# Supplementary material for: Smchd1 is a maternal effect gene required for genomic imprinting
Source: eLife. 2020 Nov 13;9:e55529. doi: 10.7554/eLife.55529 (PMC7665889; doi:10.7554/eLife.55529)
Supplement: Supplementary file 1. — (a) Differential imprinted expression in male E14.5 B6Cast placentae, Smchd1 matΔ versus wt. A gene is called differentially imprinted if the multiple-testing corrected p-value is below 0.05 and the absolute difference in silent allele proportion greater than 0.05 (b) Differential imprinted expression in male E14.5 CastB6 placentae, Smchd1 het versus wt. A gene is called differentially imprinted if the multiple-testing corrected p-value is below 0.05 and the absolute difference in silent allele proportion greater than 0.05 (c) Differential imprinted expression in male E9.5 B6Cast embryos, Smchd1 matΔ versus wt. A gene is called differentially imprinted if the multiple-testing corrected p-value is below 0.05 and the absolute difference in silent allele proportion greater than 0.05. Gnas is likely a false positive because in the second dataset of E9.5 embryos (maternal and zygotic deletions) it did not display imprinted expression in the wt samples (d) Differential imprinted expression in male E2.75 B6Cast embryos, Smchd1 matΔ versus wt. A gene is called differentially imprinted if the multiple-testing corrected p-value is below 0.05 and the absolute difference in silent allele proportion greater than 0.05 (e) Differential imprinted expression in male E14.5 B6(CastB6) placentae, Smchd1 matΔ versus wt. A gene is called differentially imprinted if the multiple-testing corrected p-value is below 0.05 and the absolute difference in silent allele proportion greater than 0.05 (f) Differential imprinted expression in male E14.5 B6(CastB6) placentae, Smchd1 zygΔ versus wt. A gene is called differentially imprinted if the multiple-testing corrected p-value is below 0.05 and the absolute difference in silent allele proportion greater than 0.05 (g) Differential imprinted expression in male E14.5 B6(CastB6) placentae, Smchd1 matzygΔ versus wt. A gene is called differentially imprinted if the multiple-testing corrected p-value is below 0.05 and the absolute difference in silent al [file elife-55529-supp1.xlsx]

## Sheet: E14.5_maternal
Supplementary file 1a. Differential imprinted expression in male E14.5 B6Cast placentae, Smchd1 matΔ vs wt. A gene is called differentiallly imprinted if the multiple-testing corrected p-value is below 0.05 and the absolute difference in silent allele proportion greater than 0.05
ensembl_gene_id	gene	chromosome_name	start_position	strand	location	locus	cluster	expressed_allele	expressed	imprinted	sufficient_counts	oo_minus_wt	padj	diff_imprinted
ENSMUSG00000056972	Magel2	7	62377010	1	7 C-B5	NA	cent_7	P	TRUE	TRUE	TRUE	0.257567	9.14725e-61	TRUE
ENSMUSG00000033585	Ndn	7	62346569	1	7 C-B5	NA	cent_7	P	TRUE	TRUE	TRUE	0.17174	4.58065e-17	TRUE
ENSMUSG00000070526	Peg12	7	62461871	-1	7 C-B5	NA	cent_7	P	TRUE	TRUE	TRUE	0.210862	1.22115e-08	TRUE
ENSMUSG00000009248	Ascl2	7	142966829	-1	7 F5	NA	dist_7	M	TRUE	TRUE	TRUE	0.141665	1.30812e-07	TRUE
ENSMUSG00000021136	Smoc1	12	81026808	1	12 D1	NA	misc_12	P	TRUE	TRUE	TRUE	0.143896	1.21811e-06	TRUE
ENSMUSG00000025764	Jade1	3	41555731	1	3 B	NA	cent_3	P	TRUE	TRUE	TRUE	0.0834394	1.29016e-05	TRUE
ENSMUSG00000023868	Pde10a	17	8525372	1	17A1	NA	prox_17	M	TRUE	TRUE	TRUE	0.0739696	2.07614e-05	TRUE
ENSMUSG00000061186	Sfmbt2	2	10370510	1	2 A1	NA	prox_2	P	TRUE	TRUE	TRUE	0.0777009	7.55046e-05	TRUE
ENSMUSG00000023828	Slc22a3	17	12418960	-1	17 A1	NA	prox_17	M	TRUE	TRUE	TRUE	0.087986	0.00141772	TRUE
ENSMUSG00000045752	Tssc4	7	143069249	1	7 F5	NA	dist_7	M	TRUE	TRUE	TRUE	0.0696075	0.00180329	TRUE
ENSMUSG00000097639	Platr4	3	41484024	-1	3 B	NA	cent_3	P	TRUE	TRUE	TRUE	0.123143	0.00324014	TRUE
ENSMUSG00000043439	Epop	11	97627389	-1	NA	NA	misc_11	P	TRUE	TRUE	TRUE	0.0511608	0.00717477	TRUE
ENSMUSG00000029304	Spp1	5	104435118	1	NA	NA	misc_5	M	TRUE	TRUE	TRUE	0.0290528	0.0356984	TRUE
ENSMUSG00000021268	Meg3	12	109541001	1	12 F1	NA	dist_12	M	TRUE	TRUE	TRUE	0.00862267	0.00255374	FALSE
ENSMUSG00000037664	Cdkn1c	7	143458339	-1	7 F5	NA	dist_7	M	TRUE	TRUE	TRUE	0.00945183	0.00368276	FALSE
ENSMUSG00000023830	Igf2r	17	12682406	-1	17 A1	NA	prox_17	M	TRUE	TRUE	TRUE	-0.0248287	0.0299966	FALSE
ENSMUSG00000040013	Fkbp6	5	135291704	-1	5 G2	NA	misc_5	P	TRUE	TRUE	TRUE	0.0362596	0.0367054	FALSE
ENSMUSG00000031665	Sall1	8	89027235	-1	NA	NA	misc_8	P	TRUE	TRUE	TRUE	0.0457188	0.0450424	FALSE
ENSMUSG00000028078	Dclk2	3	86786151	-1	NA	NA	misc_3	M	TRUE	TRUE	TRUE	0.130331	0.0510204	FALSE
ENSMUSG00000020176	Grb10	11	11930508	-1	11 A1	NA	prox_11	isoform-specific	TRUE	TRUE	TRUE	0.0250119	0.0510204	FALSE
ENSMUSG00000085860	2410003L11Rik	11	97598511	1	11 D	NA	misc_11	P	TRUE	TRUE	TRUE	0.140429	0.0575959	FALSE
ENSMUSG00000059256	Gzmd	14	56129556	-1	NA	NA	prox_14	M	TRUE	TRUE	TRUE	-0.00615091	0.0575959	FALSE
ENSMUSG00000037280	Galnt6	15	100691813	-1	15 F1	NA	misc_15	P	TRUE	TRUE	TRUE	-0.0865094	0.0592275	FALSE
ENSMUSG00000027551	Zfp64	2	168893331	-1	2 H3	NA	dist_2	P	TRUE	TRUE	TRUE	0.0819291	0.0899186	FALSE
ENSMUSG00000028581	Laptm5	4	130913125	1	NA	NA	misc_4	M	TRUE	TRUE	TRUE	0.0822712	0.0899186	FALSE
ENSMUSG00000037606	Osbpl5	7	143688762	-1	7 F5	NA	dist_7	M	TRUE	TRUE	TRUE	0.0663801	0.0899186	FALSE
ENSMUSG00000004631	Sgce	6	4674350	-1	6 A1	NA	prox_6	P	TRUE	TRUE	TRUE	-0.0201962	0.108205	FALSE
ENSMUSG00000000031	H19	7	142575529	-1	7 F5	NA	dist_7	M	TRUE	TRUE	TRUE	0.00947709	0.1377	FALSE
ENSMUSG00000031962	Cdh15	8	122847966	1	8 E1	NA	misc_8	isoform-specific	TRUE	TRUE	TRUE	0.0197023	0.1377	FALSE
ENSMUSG00000100826	Snhg14	7	59307924	-1	7 C-B5	NA	cent_7	P	TRUE	TRUE	TRUE	0.0089341	0.144909	FALSE
ENSMUSG00000073209	Klf14	6	30956023	-1	6 A3	NA	prox_6	M	TRUE	TRUE	TRUE	-0.00760122	0.1566	FALSE
ENSMUSG00000102252	Snrpn	7	59982495	-1	7 C-B5	SNURF-SNRPN	cent_7	P	TRUE	TRUE	TRUE	0.00867021	0.161905	FALSE
ENSMUSG00000029096	Htra3	5	35652023	-1	5 B3	NA	prox_5	M	TRUE	TRUE	TRUE	0.100054	0.170442	FALSE
ENSMUSG00000032827	Ppp1r9a	6	4902917	1	6 A1	NA	prox_6	M	TRUE	TRUE	TRUE	-0.0101972	0.177819	FALSE
ENSMUSG00000086748	Gm13261	2	10339283	-1	NA	NA	prox_2	P	TRUE	TRUE	TRUE	0.10183	0.194673	FALSE
ENSMUSG00000037202	Prf1	10	61297833	1	NA	NA	mid_10	M	TRUE	TRUE	TRUE	-0.00164224	0.194673	FALSE
ENSMUSG00000101609	Kcnq1ot1	7	143203458	-1	7 F5	NA	dist_7	P	TRUE	TRUE	TRUE	0.0684034	0.208441	FALSE
ENSMUSG00000024610	Cd74	18	60803848	1	NA	NA	misc_18	M	TRUE	TRUE	TRUE	-0.0378177	0.208799	FALSE
ENSMUSG00000042814	Mcts2	2	152687035	1	2 H1	NA	dist_2	P	TRUE	TRUE	TRUE	0.0334803	0.210523	FALSE
ENSMUSG00000031714	Gab1	8	80764438	-1	8 C2	NA	misc_8	P	TRUE	TRUE	TRUE	0.0149845	0.250867	FALSE
ENSMUSG00000073460	Pnldc1	17	12888902	-1	NA	NA	prox_17	M	TRUE	TRUE	TRUE	-0.0332762	0.258976	FALSE
ENSMUSG00000023826	Prkn	17	10840384	1	17 A1	NA	prox_17	M	TRUE	TRUE	TRUE	0.0347693	0.283375	FALSE
ENSMUSG00000022156	Gzme	14	56117626	-1	NA	NA	prox_14	M	TRUE	TRUE	TRUE	-0.0154364	0.292779	FALSE
ENSMUSG00000000948	Gm38393	7	59974149	-1	7 C-B5	NA	cent_7	P	TRUE	TRUE	TRUE	-0.015739	0.299886	FALSE
ENSMUSG00000040856	Dlk1	12	109452823	1	12 F1	NA	dist_12	P	TRUE	TRUE	TRUE	0.00228086	0.299886	FALSE
ENSMUSG00000097451	Rian	12	109603940	1	12 F1	NA	dist_12	M	TRUE	TRUE	TRUE	0.00216386	0.299886	FALSE
ENSMUSG00000106847	Peg13	15	72805600	-1	15 D3	NA	cent_15	P	TRUE	TRUE	TRUE	-0.00421119	0.353905	FALSE
ENSMUSG00000029664	Tfpi2	6	3962595	-1	6 A1	NA	prox_6	M	TRUE	TRUE	TRUE	0.0992189	0.359984	FALSE
ENSMUSG00000026395	Ptprc	1	138062861	-1	NA	NA	misc_1	M	TRUE	TRUE	TRUE	0.0327643	0.49861	FALSE
ENSMUSG00000028339	Col15a1	4	47208161	1	NA	NA	misc_4	M	TRUE	TRUE	TRUE	0.0494739	0.49861	FALSE
ENSMUSG00000025607	Copg2	6	30747554	-1	6 A3	NA	prox_6	M	TRUE	TRUE	TRUE	-0.0116982	0.49861	FALSE
ENSMUSG00000081833	Gm13669	2	75808358	1	NA	NA	prox_2	M	TRUE	TRUE	TRUE	0.0148289	0.5228	FALSE
ENSMUSG00000019817	Plagl1	10	13060504	1	10 A2	NA	cent_10	P	TRUE	TRUE	TRUE	0.00916548	0.5228	FALSE
ENSMUSG00000075707	Dio3	12	110279068	1	12 F1	NA	dist_12	P	TRUE	TRUE	TRUE	0.0365359	0.559796	FALSE
ENSMUSG00000079186	Gzmc	14	56231441	-1	NA	NA	prox_14	M	TRUE	TRUE	TRUE	-0.000688067	0.603071	FALSE
ENSMUSG00000002265	Peg3	7	6703892	-1	7 A2-B1	NA	prox_7	P	TRUE	TRUE	TRUE	0.0238129	0.621053	FALSE
ENSMUSG00000078247	Airn	17	12741311	1	17 A1	NA	prox_17	P	TRUE	TRUE	TRUE	0.0117909	0.621053	FALSE
ENSMUSG00000092035	Peg10	6	4747306	1	6 A1	NA	prox_6	P	TRUE	TRUE	TRUE	0.000252737	0.670391	FALSE
ENSMUSG00000044068	Zrsr1	11	22972005	1	11 A3	NA	prox_11	P	TRUE	TRUE	TRUE	-0.0147498	0.682268	FALSE
ENSMUSG00000037613	Tnfrsf23	7	143665809	-1	7 F5	NA	dist_7	M	TRUE	TRUE	TRUE	-0.00638273	0.689047	FALSE
ENSMUSG00000027520	Zdbf2	1	63273265	1	1 C2	GPR1	cent_1	P	TRUE	TRUE	TRUE	-0.0184633	0.715213	FALSE
ENSMUSG00000010751	Tnfrsf22	7	143634806	-1	7 F5	NA	dist_7	M	TRUE	TRUE	TRUE	-0.00445713	0.72229	FALSE
ENSMUSG00000087119	Atg4a-ps	3	103643954	-1	NA	NA	misc_3	M	TRUE	TRUE	TRUE	-0.00297619	0.729391	FALSE
ENSMUSG00000009545	Kcnq1	7	143106362	1	7 F5	NA	dist_7	M	TRUE	TRUE	TRUE	-0.0321895	0.729391	FALSE
ENSMUSG00000019814	Ltv1	10	13178140	-1	NA	NA	cent_10	M	TRUE	TRUE	TRUE	7.6364e-05	0.734475	FALSE
ENSMUSG00000018259	Prl8a2	13	27345673	1	NA	NA	cent_13	M	TRUE	TRUE	TRUE	-0.0530104	0.734475	FALSE
ENSMUSG00000069729	Arid1b	17	4994332	1	17 A1	NA	prox_17	M	TRUE	TRUE	TRUE	-0.00930215	0.742033	FALSE
ENSMUSG00000062866	Phactr2	10	13207717	-1	10 A1	NA	cent_10	M	TRUE	TRUE	TRUE	0.00558646	0.820746	FALSE
ENSMUSG00000024423	Impact	18	12955852	1	18 A2-B2	NA	cent_18	P	TRUE	TRUE	TRUE	0.00633598	0.820746	FALSE
ENSMUSG00000075010	AW112010	19	11047617	-1	NA	NA	misc_19	M	TRUE	TRUE	TRUE	-0.00190924	0.820746	FALSE
ENSMUSG00000083219	Gm11410	4	80003989	1	NA	NA	misc_4	M	TRUE	TRUE	TRUE	0.00490079	0.839698	FALSE
ENSMUSG00000000290	Itgb2	10	77530252	1	NA	NA	mid_10	M	TRUE	TRUE	TRUE	0.00295382	0.8413	FALSE
ENSMUSG00000051355	Commd1	11	22896136	-1	11 A3	NA	prox_11	isoform-specific	TRUE	TRUE	TRUE	0.0199914	0.8413	FALSE
ENSMUSG00000023886	Smoc2	17	14279506	1	17 A2	NA	prox_17	M	TRUE	TRUE	TRUE	0.00711591	0.875693	FALSE
ENSMUSG00000034265	Zdhhc14	17	5492557	1	17A1	NA	prox_17	M	TRUE	TRUE	TRUE	0.0167225	0.878166	FALSE
ENSMUSG00000073471	Rsph3a	17	7945614	1	17A1	NA	prox_17	M	TRUE	TRUE	TRUE	0.0123065	0.898154	FALSE
ENSMUSG00000056071	S100a9	3	90692632	-1	NA	NA	misc_3	M	TRUE	TRUE	TRUE	0.0185867	0.905687	FALSE
ENSMUSG00000000154	Slc22a18	7	143473736	1	7 F5	NA	dist_7	M	TRUE	TRUE	TRUE	0.0187236	0.905687	FALSE
ENSMUSG00000010760	Phlda2	7	143501545	-1	7 F5	NA	dist_7	M	TRUE	TRUE	TRUE	0.0509752	0.905687	FALSE
ENSMUSG00000040284	Gzmg	14	56156582	-1	NA	NA	prox_14	M	TRUE	TRUE	TRUE	0.000145754	0.905687	FALSE
ENSMUSG00000048583	Igf2	7	142650766	-1	7 F5	NA	dist_7	P	TRUE	TRUE	TRUE	-4.319e-05	0.969089	FALSE
ENSMUSG00000009876	Cox4i2	2	152754173	1	2 H1	NA	dist_2	P	TRUE	TRUE	TRUE	0.00321834	0.971089	FALSE
ENSMUSG00000027523	Gnas	2	174284320	1	2 H4	Gnas	dist_2	M	TRUE	TRUE	TRUE	0.0160432	0.971089	FALSE
ENSMUSG00000042607	Asb4	6	5383386	1	6 A1	NA	prox_6	M	TRUE	TRUE	TRUE	0.011853	0.971089	FALSE
ENSMUSG00000051855	Mest	6	30723547	1	6 A3	NA	prox_6	isoform-specific	TRUE	TRUE	TRUE	0.000668025	0.971089	FALSE
ENSMUSG00000002266	Zim1	7	6671269	-1	7 A2-B1	NA	prox_7	M	TRUE	TRUE	TRUE	0.00181557	0.971089	FALSE
ENSMUSG00000051527	Usp29	7	6730578	1	7 A2-B1	NA	prox_7	P	TRUE	TRUE	TRUE	0.00378869	0.971089	FALSE
ENSMUSG00000032359	Ctsh	9	90054152	1	9 E3.1	NA	dist_9	P	TRUE	TRUE	TRUE	-0.00644795	0.971089	FALSE
ENSMUSG00000085925	Rtl1	12	109589193	-1	12 F1	NA	dist_12	P	TRUE	TRUE	TRUE	-0.00287004	0.971089	FALSE
ENSMUSG00000097391	Mirg	12	109729764	1	12 F1	Mirg	dist_12	M	TRUE	TRUE	TRUE	-0.0138333	0.971089	FALSE
ENSMUSG00000068391	Chrac1	15	73090392	1	15 D3	NA	cent_15	M	TRUE	TRUE	TRUE	0.0167356	0.971089	FALSE
ENSMUSG00000089817	Gm7162	17	12819819	-1	NA	NA	prox_17	P	TRUE	TRUE	TRUE	0.00610134	0.971089	FALSE
ENSMUSG00000048826	Dact2	17	14195052	-1	17 A2	NA	prox_17	M	TRUE	TRUE	TRUE	0.0145366	0.971089	FALSE
ENSMUSG00000082536	Gm13456	2	40555752	1	NA	NA	prox_2	M	TRUE	TRUE	TRUE	0.000410531	0.975324	FALSE
ENSMUSG00000031075	Ano1	7	144588549	-1	7 F5	NA	dist_7	M	TRUE	TRUE	TRUE	0.00797592	0.975324	FALSE
ENSMUSG00000022464	Slc38a4	15	96994820	-1	15 F1	NA	misc_15	P	TRUE	TRUE	TRUE	-0.00666566	0.975324	FALSE
ENSMUSG00000086266	Igf2os	7	142659693	1	7 F5	NA	dist_7	P	TRUE	TRUE	TRUE	-0.000659177	0.988504	FALSE
ENSMUSG00000025967	Eef1b2	1	63176825	1	1 C2	GPR1	cent_1	P	TRUE	FALSE	FALSE	0.00650209	NA	FALSE
ENSMUSG00000046856	Gpr1	1	63182691	-1	1 C2	GPR1	cent_1	P	TRUE	FALSE	FALSE	-0.0133304	NA	FALSE
ENSMUSG00000025964	Adam23	1	63445891	1	1 C2	GPR1	cent_1	P	TRUE	FALSE	FALSE	0.00560383	NA	FALSE
ENSMUSG00000026471	Mr1	1	155127277	-1	1 G3	NA	misc_1	M	TRUE	FALSE	FALSE	-0.0340435	NA	FALSE
ENSMUSG00000026470	Stx6	1	155158715	1	1 G3	NA	misc_1	M	TRUE	FALSE	FALSE	0.00725404	NA	FALSE
ENSMUSG00000033722	BC034090	1	155212471	-1	1 G3	NA	misc_1	M	TRUE	FALSE	FALSE	-0.0068363	NA	FALSE
ENSMUSG00000087701	Gm13493	2	51871126	-1	NA	NA	prox_2	M	TRUE	TRUE	FALSE	-0.483333	NA	FALSE
ENSMUSG00000026970	Rbms1	2	60750193	-1	2 C1.2	NA	prox_2	P	TRUE	FALSE	FALSE	0.008641	NA	FALSE
ENSMUSG00000016458	Wt1	2	105126529	1	2 E2-E3	NA	prox_2	M	TRUE	TRUE	FALSE	0.0994748	NA	FALSE
ENSMUSG00000040093	Bmf	2	118528757	-1	NA	NA	prox_2	M	TRUE	TRUE	FALSE	0.0296972	NA	FALSE
ENSMUSG00000019188	H13	2	152669461	1	2 H1	NA	dist_2	isoform-specific	TRUE	FALSE	FALSE	0.0762731	NA	FALSE
ENSMUSG00000042745	Id1	2	152736251	1	2 H1	NA	dist_2	P	TRUE	FALSE	FALSE	-0.0299147	NA	FALSE
ENSMUSG00000007659	Bcl2l1	2	152780668	-1	2 H1	NA	dist_2	P	TRUE	FALSE	FALSE	0.000440114	NA	FALSE
ENSMUSG00000027469	Tpx2	2	152847964	1	2 H1	NA	dist_2	P	TRUE	FALSE	FALSE	-0.00600553	NA	FALSE
ENSMUSG00000067787	Blcap	2	157556362	-1	2 H1	NA	dist_2	isoform-specific	TRUE	FALSE	FALSE	0.0128347	NA	FALSE
ENSMUSG00000067786	Nnat	2	157560078	1	2 H1	NA	dist_2	P	TRUE	TRUE	FALSE	0.645833	NA	FALSE
ENSMUSG00000008999	Bmp7	2	172868012	-1	2 H3	NA	dist_2	P	TRUE	FALSE	FALSE	-0.0208986	NA	FALSE
ENSMUSG00000027522	Stx16	2	174076308	1	2 H4	NA	dist_2	M	TRUE	FALSE	FALSE	-0.00411561	NA	FALSE
ENSMUSG00000039263	Npepl1	2	174110349	1	2 H4	NA	dist_2	M	TRUE	TRUE	FALSE	-0.0307587	NA	FALSE
ENSMUSG00000105260	Gm40040	3	41477577	-1	NA	NA	cent_3	P	TRUE	TRUE	FALSE	0.305848	NA	FALSE
ENSMUSG00000106223	2400006e01Rik	3	41521247	-1	3 B	NA	cent_3	P	TRUE	TRUE	FALSE	0.13261	NA	FALSE
ENSMUSG00000027955	Gask1b	3	79884533	1	3 E3	NA	misc_3	P	TRUE	FALSE	FALSE	-0.026879	NA	FALSE
ENSMUSG00000037221	Mospd3	5	137596645	-1	5 G2	NA	misc_5	P	TRUE	FALSE	FALSE	0.0210199	NA	FALSE
ENSMUSG00000042817	Flt3	5	147330741	-1	NA	NA	misc_5	P	TRUE	FALSE	FALSE	0.0751514	NA	FALSE
ENSMUSG00000015189	Casd1	6	4600839	1	6 A1	NA	prox_6	M	TRUE	FALSE	FALSE	-0.00162211	NA	FALSE
ENSMUSG00000029775	Klhdc10	6	30401868	1	6 A3	NA	prox_6	M	TRUE	TRUE	FALSE	-0.0134975	NA	FALSE
ENSMUSG00000029804	Herc3	6	58831465	1	6 B3	NA	prox_6	isoform-specific	TRUE	FALSE	FALSE	-0.0247673	NA	FALSE
ENSMUSG00000025889	Snca	6	60731575	-1	NA	NA	prox_6	M	TRUE	TRUE	FALSE	-0.0364912	NA	FALSE
ENSMUSG00000030199	Etv6	6	134035700	1	6 G1	NA	dist_6	P	TRUE	TRUE	FALSE	0.0175279	NA	FALSE
ENSMUSG00000002602	Axl	7	25757273	-1	7 A3-B1	NA	misc_7	M	TRUE	FALSE	FALSE	-0.0272377	NA	FALSE
ENSMUSG00000030579	Tyrobp	7	30413760	1	NA	NA	misc_7	M	TRUE	TRUE	FALSE	0.0839953	NA	FALSE
ENSMUSG00000025326	Ube3a	7	59228750	1	7 C-B5	NA	cent_7	M	TRUE	FALSE	FALSE	-0.00806039	NA	FALSE
ENSMUSG00000070527	Mkrn3	7	62417593	-1	7 C-B5	NA	cent_7	P	TRUE	TRUE	FALSE	0.0758889	NA	FALSE
ENSMUSG00000030638	Sh3gl3	7	82173840	1	7 D3	NA	misc_7	P	TRUE	FALSE	FALSE	0.00279295	NA	FALSE
ENSMUSG00000030782	Tgfb1i1	7	128246812	1	7 F3	NA	distcent_7	M	TRUE	FALSE	FALSE	-0.00574483	NA	FALSE
ENSMUSG00000030847	Bag3	7	128523616	1	7 F3	NA	distcent_7	M	TRUE	TRUE	FALSE	-0.0242319	NA	FALSE
ENSMUSG00000042105	Inpp5f	7	128611328	1	7 F3	NA	distcent_7	P	TRUE	FALSE	FALSE	-0.038278	NA	FALSE
ENSMUSG00000045777	Ifitm10	7	142325837	-1	7 F5	NA	dist_7	M	TRUE	FALSE	FALSE	-0.0137253	NA	FALSE
ENSMUSG00000018819	Lsp1	7	142460809	1	7 F5	NA	dist_7	M	TRUE	FALSE	FALSE	-0.0156507	NA	FALSE
ENSMUSG00000000214	Th	7	142892752	-1	7 F5	NA	dist_7	M	TRUE	FALSE	FALSE	0.154664	NA	FALSE
ENSMUSG00000037706	Cd81	7	143052739	1	7 F5	NA	dist_7	M	TRUE	FALSE	FALSE	0.0206722	NA	FALSE
ENSMUSG00000059119	Nap1l4	7	143513579	-1	7 F5	NA	dist_7	M	TRUE	FALSE	FALSE	0.0106422	NA	FALSE
ENSMUSG00000040111	Gramd1b	9	40293233	-1	9 A5.1	NA	misc_9	P	TRUE	TRUE	FALSE	0.0431423	NA	FALSE
ENSMUSG00000032299	Commd4	9	57155035	-1	NA	NA	misc_9	P	TRUE	FALSE	FALSE	0.0198855	NA	FALSE
ENSMUSG00000032280	Tle3	9	61372366	1	9 B	NA	misc_9	P	TRUE	FALSE	FALSE	-0.00149348	NA	FALSE
ENSMUSG00000040204	Pclaf	9	65890237	1	NA	NA	misc_9	P	TRUE	FALSE	FALSE	-0.0467359	NA	FALSE
ENSMUSG00000032422	Snx14	9	88376750	-1	9 E3.1	NA	dist_9	P	TRUE	FALSE	FALSE	-0.00272949	NA	FALSE
ENSMUSG00000032356	Rasgrf1	9	89909908	1	9 E3.1	NA	dist_9	P	TRUE	TRUE	FALSE	0.11241	NA	FALSE
ENSMUSG00000019795	Pcmt1	10	7629373	-1	10 A1	NA	misc_10	P	TRUE	FALSE	FALSE	-0.0118789	NA	FALSE
ENSMUSG00000025348	Itga7	10	128933818	1	NA	NA	dist_10	M	TRUE	TRUE	FALSE	0.0704246	NA	FALSE
ENSMUSG00000020182	Ddc	11	11814101	-1	11 A1	NA	prox_11	P	TRUE	FALSE	FALSE	-0.0449315	NA	FALSE
ENSMUSG00000020173	Cobl	11	12236608	-1	11 A1	NA	prox_11	M	TRUE	FALSE	FALSE	0.0775842	NA	FALSE
ENSMUSG00000051650	B3gnt2	11	22759738	-1	11 A3.2	NA	prox_11	M	TRUE	FALSE	FALSE	0.00174132	NA	FALSE
ENSMUSG00000036545	Adamts2	11	50602084	1	11 B1.3	NA	misc_11	P	TRUE	TRUE	FALSE	0.0757283	NA	FALSE
ENSMUSG00000086646	Platr20	11	51189833	-1	11 B1.3	NA	misc_11	P	TRUE	TRUE	FALSE	0.0202806	NA	FALSE
ENSMUSG00000061469	Gm12569	11	51220473	1	11 B1.3	NA	misc_11	P	TRUE	FALSE	FALSE	0.0161463	NA	FALSE
ENSMUSG00000045942	BC049762	11	51253651	-1	11 B1.3	NA	misc_11	P	TRUE	TRUE	FALSE	-0.0363128	NA	FALSE
ENSMUSG00000035112	Wnk4	11	101260567	1	11 D	NA	misc_11	M	TRUE	TRUE	FALSE	0.0138097	NA	FALSE
ENSMUSG00000039963	Ccdc40	11	119228572	1	11 E2	NA	misc_11	P	TRUE	FALSE	FALSE	-0.0282994	NA	FALSE
ENSMUSG00000020634	Ubxn2a	12	4879032	-1	NA	NA	prox_12	P	TRUE	FALSE	FALSE	0.0404729	NA	FALSE
ENSMUSG00000015143	Actn1	12	80167547	-1	12 C3	NA	misc_12	P	TRUE	FALSE	FALSE	-0.0025491	NA	FALSE
ENSMUSG00000021266	Wars	12	108860030	-1	12 F1	NA	dist_12	P	TRUE	FALSE	FALSE	-0.00307264	NA	FALSE
ENSMUSG00000017843	Ppp2r5c	12	110447120	1	12 F1	NA	dist_12	P	TRUE	FALSE	FALSE	-0.00517669	NA	FALSE
ENSMUSG00000018707	Dync1h1	12	110601452	1	12 F1	NA	dist_12	P	TRUE	FALSE	FALSE	-0.0171918	NA	FALSE
ENSMUSG00000016477	E2f3	13	29906575	-1	13 A3.2	NA	cent_13	P	TRUE	FALSE	FALSE	-0.0129978	NA	FALSE
ENSMUSG00000047842	Diras2	13	52504380	-1	NA	NA	cent_13	M	TRUE	TRUE	FALSE	0.0621021	NA	FALSE
ENSMUSG00000041773	Enc1	13	97241105	1	13 D1	NA	dist_13	P	TRUE	FALSE	FALSE	0.00584209	NA	FALSE
ENSMUSG00000021699	Pde4d	13	108449948	1	13 D2	NA	dist_13	P	TRUE	FALSE	FALSE	0.00221069	NA	FALSE
ENSMUSG00000040314	Ctsg	14	56099881	-1	NA	NA	prox_14	M	TRUE	TRUE	FALSE	0.0300437	NA	FALSE
ENSMUSG00000015441	Gzmf	14	56205263	-1	NA	NA	prox_14	M	TRUE	TRUE	FALSE	0.0159322	NA	FALSE
ENSMUSG00000061517	Sox21	14	118233232	-1	14 E4	NA	misc_14	P	TRUE	FALSE	FALSE	0.138258	NA	FALSE
ENSMUSG00000022139	Mbnl2	14	120275669	1	14 E4	NA	misc_14	P	TRUE	FALSE	FALSE	-0.0110954	NA	FALSE
ENSMUSG00000047921	Trappc9	15	72589620	-1	15 D3	NA	cent_15	isoform-specific	TRUE	FALSE	FALSE	-0.0131389	NA	FALSE
ENSMUSG00000036698	Ago2	15	73095844	-1	15 D3	NA	cent_15	M	TRUE	TRUE	FALSE	-0.00209171	NA	FALSE
ENSMUSG00000000489	Pdgfb	15	79995874	-1	15 E1	NA	cent_15	P	TRUE	TRUE	FALSE	0.0745014	NA	FALSE
ENSMUSG00000023169	Slc38a1	15	96571418	-1	15 F1	NA	misc_15	P	TRUE	FALSE	FALSE	-0.00505344	NA	FALSE
ENSMUSG00000022462	Slc38a2	15	96687392	-1	15 F1	NA	misc_15	P	TRUE	FALSE	FALSE	-0.00989316	NA	FALSE
ENSMUSG00000022641	Bbx	16	50191844	-1	16 B5	NA	cent_16	P	TRUE	FALSE	FALSE	0.0109694	NA	FALSE
ENSMUSG00000022639	Dubr	16	50719294	-1	NA	NA	cent_16	P	TRUE	FALSE	FALSE	0.0402858	NA	FALSE
ENSMUSG00000022952	Runx1	16	92601466	-1	16 C4	NA	misc_16	P	TRUE	TRUE	FALSE	-0.00250265	NA	FALSE
ENSMUSG00000023861	Mpc1	17	8282904	1	17A1	NA	prox_17	M	TRUE	TRUE	FALSE	-0.0300588	NA	FALSE
ENSMUSG00000062078	Qk	17	10202601	-1	17 A1	NA	prox_17	M	TRUE	FALSE	FALSE	-0.00187238	NA	FALSE
ENSMUSG00000023885	Thbs2	17	14665500	-1	17 A2	NA	prox_17	M	TRUE	TRUE	FALSE	-0.00302811	NA	FALSE
ENSMUSG00000036594	H2-Aa	17	34282744	-1	NA	NA	misc_17	M	TRUE	TRUE	FALSE	0.153335	NA	FALSE
ENSMUSG00000024140	Epas1	17	86753700	1	17 E4	NA	cent_17	P	TRUE	FALSE	FALSE	-0.000473284	NA	FALSE
ENSMUSG00000044906	4930503L19Rik	18	70452212	-1	NA	NA	misc_18	P	TRUE	FALSE	FALSE	0.0236361	NA	FALSE
ENSMUSG00000048720	Tbc1d12	19	38836579	1	19 C3	NA	cent_19	P	TRUE	FALSE	FALSE	0.0126951	NA	FALSE
ENSMUSG00000026358	Rgs1	1	144242296	-1	NA	NA	misc_1	M	FALSE	NA	FALSE	NA	NA	NA
ENSMUSG00000026581	Sell	1	164061982	1	NA	NA	misc_1	M	FALSE	NA	FALSE	NA	NA	NA
ENSMUSG00000073494	Sh2d1b2	1	170232749	1	NA	NA	misc_1	M	FALSE	NA	FALSE	NA	NA	NA
ENSMUSG00000038421	Fcrla	1	170917576	-1	NA	NA	misc_1	M	FALSE	NA	FALSE	NA	NA	NA
NA	Zdbf2linc	1	NA	NA	1 C2	GPR1	cent_1	P	FALSE	NA	FALSE	NA	NA	NA
NA	XLOC_047844	2	10308628	-1	2	NA	prox_2	P	FALSE	NA	FALSE	NA	NA	NA
ENSMUSG00000026770	Il2ra	2	11642807	1	NA	NA	prox_2	M	FALSE	NA	FALSE	NA	NA	NA
ENSMUSG00000068129	Cst7	2	150570415	1	NA	NA	dist_2	M	FALSE	NA	FALSE	NA	NA	NA
ENSMUSG00000074622	Mafb	2	160363703	-1	2 H2	NA	dist_2	M	FALSE	NA	FALSE	NA	NA	NA
ENSMUSG00000065521	Mir296	2	174267047	-1	2 H4	Gnas	dist_2	P	FALSE	NA	FALSE	NA	NA	NA
ENSMUSG00000065410	Mir298	2	174267504	-1	2 H4	Gnas	dist_2	P	FALSE	NA	FALSE	NA	NA	NA
ENSMUSG00000086537	Nespas	2	174281237	-1	2 H4	Gnas	dist_2	P	FALSE	NA	FALSE	NA	NA	NA
ENSMUSG00000027524	Edn3	2	174760619	1	2 H4	Gnas	dist_2	P	FALSE	NA	FALSE	NA	NA	NA
NA	NESP55	2	NA	NA	2 H4	Gnas	dist_2	M	FALSE	NA	FALSE	NA	NA	NA
NA	GNASXL	2	NA	NA	2 H4	Gnas	dist_2	P	FALSE	NA	FALSE	NA	NA	NA
NA	Exon-1A	2	NA	NA	2 H4	Gnas	dist_2	P	FALSE	NA	FALSE	NA	NA	NA
NA	GS-alpha	2	NA	NA	2 H4	Gnas	dist_2	M	FALSE	NA	FALSE	NA	NA	NA
NA	F7	2	NA	NA	2 H4	Gnas	dist_2	M	FALSE	NA	FALSE	NA	NA	NA
ENSMUSG00000001865	Cpa3	3	20215620	-1	NA	NA	misc_3	M	FALSE	NA	FALSE	NA	NA	NA
ENSMUSG00000028859	Csf3r	4	126024550	1	NA	NA	misc_4	M	FALSE	NA	FALSE	NA	NA	NA
ENSMUSG00000097287	D130017N08Rik	5	143758354	1	5 G2	NA	misc_5	P	FALSE	NA	FALSE	NA	NA	NA
ENSMUSG00000023964	Calcr	6	3685680	-1	6 A1	NA	prox_6	M	FALSE	NA	FALSE	NA	NA	NA
ENSMUSG00000065501	Mir335	6	30741299	1	6 A3	NA	prox_6	P	FALSE	NA	FALSE	NA	NA	NA
ENSMUSG00000039032	Tsga13	6	30896981	-1	6 A3.3	NA	prox_6	M	FALSE	NA	FALSE	NA	NA	NA
ENSMUSG00000076490	Trbc1	6	41538218	1	NA	NA	prox_6	M	FALSE	NA	FALSE	NA	NA	NA
ENSMUSG00000055430	Nap1l5	6	58905233	-1	6 C1	NA	prox_6	P	FALSE	NA	FALSE	NA	NA	NA
ENSMUSG00000030114	Klrg1	6	122270596	-1	NA	NA	dist_6	M	FALSE	NA	FALSE	NA	NA	NA
ENSMUSG00000108090	Gm6637	6	122295664	1	NA	NA	dist_6	M	FALSE	NA	FALSE	NA	NA	NA
NA	Copg2os1	6	NA	NA	6 A3	NA	prox_6	P	FALSE	NA	FALSE	NA	NA	NA
ENSMUSG00000108113	Zim2	7	6651748	-1	7 A2-B1	NA	prox_7	M	FALSE	NA	FALSE	NA	NA	NA
ENSMUSG00000108043	Zim3	7	6955685	-1	7 A2-B1	NA	prox_7	M	FALSE	NA	FALSE	NA	NA	NA
ENSMUSG00000109176	Zfp264	7	6977246	1	7 A2-B1	NA	prox_7	P	FALSE	NA	FALSE	NA	NA	NA
ENSMUSG00000077191	Snord64	7	59978808	-1	7C-B5	SNURF-SNRPN	cent_7	P	FALSE	NA	FALSE	NA	NA	NA
ENSMUSG00000089375	Snord107	7	59980876	-1	7C-B5	SNURF-SNRPN	cent_7	P	FALSE	NA	FALSE	NA	NA	NA
ENSMUSG00000102627	Snurf	7	59995449	-1	7 C-B5	SNURF-SNRPN	cent_7	P	FALSE	NA	FALSE	NA	NA	NA
NA	XLOC_075991	7	60641818	-1	7	NA	cent_7	P	FALSE	NA	FALSE	NA	NA	NA
ENSMUSG00000109006	B230209E15Rik	7	61529871	-1	7 C-B5	NA	cent_7	P	FALSE	NA	FALSE	NA	NA	NA
ENSMUSG00000109394	A230057D06Rik	7	61704519	-1	7 C-B5	NA	cent_7	P	FALSE	NA	FALSE	NA	NA	NA
ENSMUSG00000109321	A330076H08Rik	7	61930137	-1	7 C-B5	NA	cent_7	P	FALSE	NA	FALSE	NA	NA	NA
ENSMUSG00000045813	Gm9801	7	62094506	-1	7 C-B5	NA	cent_7	P	FALSE	NA	FALSE	NA	NA	NA
ENSMUSG00000030724	Cd19	7	126408450	-1	NA	NA	distcent_7	M	FALSE	NA	FALSE	NA	NA	NA
ENSMUSG00000087090	Nctc1	7	142544609	-1	7 F5	NA	dist_7	P	FALSE	NA	FALSE	NA	NA	NA
ENSMUSG00000000215	Ins2	7	142678656	-1	7 F5	NA	dist_7	P	FALSE	NA	FALSE	NA	NA	NA
ENSMUSG00000059277	R74862	7	143021784	-1	7 F5	NA	dist_7	M	FALSE	NA	FALSE	NA	NA	NA
NA	AF313042	7	143462528	NA	7 F5	NA	dist_7	M	FALSE	NA	FALSE	NA	NA	NA
ENSMUSG00000045362	Tnfrsf26	7	143607659	-1	7 F5	NA	dist_7	M	FALSE	NA	FALSE	NA	NA	NA
ENSMUSG00000109251	E230032D23Rik	7	143628024	1	7	NA	dist_7	M	FALSE	NA	FALSE	NA	NA	NA
NA	Peg3os	7	NA	NA	7 A1	NA	prox_7	P	FALSE	NA	FALSE	NA	NA	NA
NA	Mkrn3os	7	NA	NA	7C-B5	NA	cent_7	P	FALSE	NA	FALSE	NA	NA	NA
NA	BM117114	7	NA	NA	7C-B5	NA	cent_7	P	FALSE	NA	FALSE	NA	NA	NA
NA	Pec2	7	NA	NA	7C-B5	NA	cent_7	P	FALSE	NA	FALSE	NA	NA	NA
NA	BB077283	7	NA	NA	7C-B5	NA	cent_7	P	FALSE	NA	FALSE	NA	NA	NA
NA	Pec3	7	NA	NA	7C-B5	NA	cent_7	P	FALSE	NA	FALSE	NA	NA	NA
NA	Snord116_cluster	7	NA	NA	7C-B5	pwcr1	cent_7	P	FALSE	NA	FALSE	NA	NA	NA
NA	Snord115_cluster	7	NA	NA	7C-B5	pwcr1	cent_7	P	FALSE	NA	FALSE	NA	NA	NA
NA	U80893	7	NA	NA	7C-B5	NA	cent_7	P	FALSE	NA	FALSE	NA	NA	NA
NA	PIHit	7	NA	NA	7 F5	NA	dist_7	P	FALSE	NA	FALSE	NA	NA	NA
NA	Tsci1	8	80859408	1	8	NA	misc_8	P	FALSE	NA	FALSE	NA	NA	NA
ENSMUSG00000032094	Cd3d	9	44981786	1	NA	NA	misc_9	M	FALSE	NA	FALSE	NA	NA	NA
ENSMUSG00000065596	Mir184	9	89802260	-1	9 E3.1	NA	dist_9	P	FALSE	NA	FALSE	NA	NA	NA
ENSMUSG00000098627	4930524O08Rik	9	89826519	1	9 E3.1	NA	dist_9	P	FALSE	NA	FALSE	NA	NA	NA
ENSMUSG00000032454	Rbp2	9	98486115	1	9 E3.3	NA	dist_9	P	FALSE	NA	FALSE	NA	NA	NA
NA	AS4	9	NA	1	9 E3.1	NA	dist_9	P	FALSE	NA	FALSE	NA	NA	NA
ENSMUSG00000025383	Il23a	10	128296139	-1	NA	NA	dist_10	M	FALSE	NA	FALSE	NA	NA	NA
NA	XLOC_011039	11	12037523	1	11	NA	misc_11	M	FALSE	NA	FALSE	NA	NA	NA
NA	Tsci2	11	12151320	1	11	NA	misc_11	M	FALSE	NA	FALSE	NA	NA	NA
ENSMUSG00000020399	Havcr2	11	46454935	1	NA	NA	misc_11	M	FALSE	NA	FALSE	NA	NA	NA
ENSMUSG00000066632	Pgk1-rs7	12	10898986	-1	NA	NA	misc_12	M	FALSE	NA	FALSE	NA	NA	NA
ENSMUSG00000112546	Gm6992	12	31018218	1	NA	NA	misc_12	P	FALSE	NA	FALSE	NA	NA	NA
NA	Tsci4	12	81007809	-1	12	NA	misc_12	P	FALSE	NA	FALSE	NA	NA	NA
ENSMUSG00000047415	Gpr68	12	100876682	-1	12 F1	NA	dist_12	M	FALSE	NA	FALSE	NA	NA	NA
ENSMUSG00000040867	Begain	12	109032187	-1	12 F1	NA	dist_12	P	FALSE	NA	FALSE	NA	NA	NA
ENSMUSG00000112977	Gm34081	12	109493529	-1	12	NA	dist_12	M	FALSE	NA	FALSE	NA	NA	NA
ENSMUSG00000065526	Mir337	12	109585789	1	12 F1	NA	dist_12	M	FALSE	NA	FALSE	NA	NA	NA
ENSMUSG00000070080	Mir431	12	109590447	1	12 F1	anti-Rtl1	dist_12	M	FALSE	NA	FALSE	NA	NA	NA
ENSMUSG00000070072	Mir433	12	109591715	1	12 F1	anti-Rtl1	dist_12	M	FALSE	NA	FALSE	NA	NA	NA
ENSMUSG00000070076	Mir127	12	109592846	1	12 F1	anti-Rtl1	dist_12	M	FALSE	NA	FALSE	NA	NA	NA
ENSMUSG00000070133	Mir434	12	109594506	1	12 F1	anti-Rtl1	dist_12	M	FALSE	NA	FALSE	NA	NA	NA
ENSMUSG00000087855	Mir432	12	109594956	1	12 F1	anti-Rtl1	dist_12	M	FALSE	NA	FALSE	NA	NA	NA
ENSMUSG00000104858	Mir136	12	109595327	1	12 F1	anti-Rtl1	dist_12	M	FALSE	NA	FALSE	NA	NA	NA
ENSMUSG00000065433	Mir370	12	109618258	1	12 F1	Rian	dist_12	M	FALSE	NA	FALSE	NA	NA	NA
ENSMUSG00000088294	AF357425	12	109636012	1	12 F1	Rian	dist_12	M	FALSE	NA	FALSE	NA	NA	NA
NA	AF357426	12	109642838	1	12 F1	Rian	dist_12	M	FALSE	NA	FALSE	NA	NA	NA
NA	AF357359	12	109650709	1	12 F1	Rian	dist_12	M	FALSE	NA	FALSE	NA	NA	NA
ENSMUSG00000064621	Gm26922	12	109654627	1	12 F1	Rian	dist_12	M	FALSE	NA	FALSE	NA	NA	NA
ENSMUSG00000065749	AF357428	12	109679945	1	12 F1	Rian	dist_12	M	FALSE	NA	FALSE	NA	NA	NA
ENSMUSG00000065022	AF357341	12	109681519	1	12 F1	Rian	dist_12	M	FALSE	NA	FALSE	NA	NA	NA
ENSMUSG00000065477	Mir411	12	109710175	1	12 F1	Mirg	dist_12	M	FALSE	NA	FALSE	NA	NA	NA
ENSMUSG00000104582	Mir380	12	109711803	1	12 F1	Mirg	dist_12	M	FALSE	NA	FALSE	NA	NA	NA
ENSMUSG00000105853	Mir376b	12	109723458	1	12 F1	Mirg	dist_12	M	FALSE	NA	FALSE	NA	NA	NA
ENSMUSG00000065426	Mir134	12	109734139	1	12 F1	Mirg	dist_12	M	FALSE	NA	FALSE	NA	NA	NA
ENSMUSG00000065448	Mir154	12	109738433	1	12 F1	Mirg	dist_12	M	FALSE	NA	FALSE	NA	NA	NA
ENSMUSG00000065497	Mir410	12	109743715	1	12 F1	Mirg	dist_12	M	FALSE	NA	FALSE	NA	NA	NA
ENSMUSG00000104213	Ighd	12	113406604	-1	NA	NA	dist_12	M	FALSE	NA	FALSE	NA	NA	NA
NA	DLK1 downstream transcripts	12	NA	NA	12 F1	NA	NA	P	FALSE	NA	FALSE	NA	NA	NA
NA	Mico1	12	NA	NA	12 F1	NA	NA	M	FALSE	NA	FALSE	NA	NA	NA
NA	Mico1os	12	NA	NA	12 F1	NA	NA	M	FALSE	NA	FALSE	NA	NA	NA
NA	anti-Rtl1	12	NA	NA	12 F1	anti-Rtl1	dist_12	M	FALSE	NA	FALSE	NA	NA	NA
ENSMUSG00000053101	Gpr141	13	19749682	-1	NA	NA	misc_13	M	FALSE	NA	FALSE	NA	NA	NA
ENSMUSG00000044231	Nhlrc1	13	47012557	-1	13 A5	NA	cent_13	P	FALSE	NA	FALSE	NA	NA	NA
ENSMUSG00000046082	Tmem174	13	98634978	-1	13 D1	NA	dist_13	P	FALSE	NA	FALSE	NA	NA	NA
ENSMUSG00000021848	Otx2	14	48657677	-1	14 C1	NA	prox_14	P	FALSE	NA	FALSE	NA	NA	NA
ENSMUSG00000098682	Otx2os1	14	48668708	1	14 C1	NA	prox_14	P	FALSE	NA	FALSE	NA	NA	NA
ENSMUSG00000033470	Cysltr2	14	73025603	-1	NA	NA	cent_14	M	FALSE	NA	FALSE	NA	NA	NA
ENSMUSG00000034997	Htr2a	14	74640840	1	14 D2	NA	cent_14	M	FALSE	NA	FALSE	NA	NA	NA
ENSMUSG00000036760	Kcnk9	15	72501089	-1	15 D3	NA	cent_15	M	FALSE	NA	FALSE	NA	NA	NA
ENSMUSG00000116295	Gm32885	15	97157029	-1	15	NA	misc_15	P	FALSE	NA	FALSE	NA	NA	NA
ENSMUSG00000022657	Cd96	16	46035657	-1	NA	NA	cent_16	M	FALSE	NA	FALSE	NA	NA	NA
ENSMUSG00000022651	Retnlg	16	48872621	1	NA	NA	cent_16	M	FALSE	NA	FALSE	NA	NA	NA
ENSMUSG00000097694	G730013B05Rik	16	50526245	1	16 B5	NA	cent_16	P	FALSE	NA	FALSE	NA	NA	NA
NA	XLOC_037414	17	4983739	-1	17	NA	prox_17	M	FALSE	NA	FALSE	NA	NA	NA
ENSMUSG00000023873	1700010I14Rik	17	8988333	1	17 A1	NA	prox_17	M	FALSE	NA	FALSE	NA	NA	NA
ENSMUSG00000037196	Pacrg	17	10403012	-1	17 A1	NA	prox_17	M	FALSE	NA	FALSE	NA	NA	NA
NA	XLOC_037615	17	12356364	-1	17	NA	prox_17	M	FALSE	NA	FALSE	NA	NA	NA
ENSMUSG00000040966	Slc22a2	17	12584132	1	17 A1	NA	prox_17	M	FALSE	NA	FALSE	NA	NA	NA
ENSMUSG00000089769	Gm16574	17	12818793	1	NA	NA	prox_17	P	FALSE	NA	FALSE	NA	NA	NA
ENSMUSG00000067049	Unc93a	17	13108617	-1	NA	NA	prox_17	M	FALSE	NA	FALSE	NA	NA	NA
NA	CrossFirre	17	NA	NA	X A5	NA	NA	M	FALSE	NA	FALSE	NA	NA	NA
ENSMUSG00000043458	Pcdhb12	18	37435621	1	18 B3	NA	misc_18	M	FALSE	NA	FALSE	NA	NA	NA
ENSMUSG00000024673	Ms4a1	19	11249675	-1	NA	NA	misc_19	M	FALSE	NA	FALSE	NA	NA	NA
ENSMUSG00000052387	Trpm3	19	22139119	1	NA	NA	misc_19	M	FALSE	NA	FALSE	NA	NA	NA
ENSMUSG00000089679	Gm16299	19	53819354	-1	19 D2	NA	cent_19	P	FALSE	NA	FALSE	NA	NA	NA
ENSMUSG00000095180	Rhox5	X	37804842	1	X A3.3	NA	cent_X	M	FALSE	NA	FALSE	NA	NA	NA
ENSMUSG00000073125	Xlr3b	X	73192207	1	X A7	NA	dist_X	M	FALSE	NA	FALSE	NA	NA	NA
ENSMUSG00000067768	Xlr4b	X	73214333	1	X A7	NA	dist_X	M	FALSE	NA	FALSE	NA	NA	NA
ENSMUSG00000031362	Xlr4c	X	73233688	-1	X A7	NA	dist_X	M	FALSE	NA	FALSE	NA	NA	NA
ENSMUSG00000085715	Tsix	X	103431517	1	X D	NA	dist_X	P	FALSE	NA	FALSE	NA	NA	NA
ENSMUSG00000086503	Xist	X	103460366	-1	X D	NA	dist_X	P	FALSE	NA	FALSE	NA	NA	NA
ENSMUSG00000097571	Jpx	X	103493556	1	X D	NA	dist_X	P	FALSE	NA	FALSE	NA	NA	NA
ENSMUSG00000086370	Ftx	X	103560907	-1	X D	NA	dist_X	M	FALSE	NA	FALSE	NA	NA	NA
ENSMUSG00000031330	Zcchc13	X	103630586	1	X D	NA	dist_X	M	FALSE	NA	FALSE	NA	NA	NA

## Sheet: E14.5_het
Supplementary file 1b. Differential imprinted expression in male E14.5 CastB6 placentae, Smchd1 het vs wt. A gene is called differentiallly imprinted if the multiple-testing corrected p-value is below 0.05 and the absolute difference in silent allele proportion greater than 0.05
ensembl_gene_id	gene	chromosome_name	start_position	strand	location	locus	cluster	expressed_allele	expressed	imprinted	sufficient_counts	patdel_minus_wt	padj	diff_imprinted
ENSMUSG00000056972	Magel2	7	62377010	1	7 C-B5	NA	cent_7	P	TRUE	TRUE	TRUE	0.192692	8.23004e-15	TRUE
ENSMUSG00000023828	Slc22a3	17	12418960	-1	17 A1	NA	prox_17	M	TRUE	TRUE	TRUE	0.0773104	7.385e-05	TRUE
ENSMUSG00000033585	Ndn	7	62346569	1	7 C-B5	NA	cent_7	P	TRUE	TRUE	TRUE	0.18707	9.43239e-05	TRUE
ENSMUSG00000070526	Peg12	7	62461871	-1	7 C-B5	NA	cent_7	P	TRUE	TRUE	TRUE	0.414081	0.000904625	TRUE
ENSMUSG00000023868	Pde10a	17	8525372	1	17A1	NA	prox_17	M	TRUE	TRUE	TRUE	0.0566864	0.00246819	TRUE
ENSMUSG00000009248	Ascl2	7	142966829	-1	7 F5	NA	dist_7	M	TRUE	TRUE	TRUE	0.176824	0.0093395	TRUE
ENSMUSG00000073209	Klf14	6	30956023	-1	6 A3	NA	prox_6	M	TRUE	TRUE	TRUE	0.0292723	0.011679	FALSE
ENSMUSG00000037664	Cdkn1c	7	143458339	-1	7 F5	NA	dist_7	M	TRUE	TRUE	TRUE	0.00553973	0.0231568	FALSE
ENSMUSG00000023886	Smoc2	17	14279506	1	17 A2	NA	prox_17	M	TRUE	TRUE	TRUE	0.0738874	0.0661046	FALSE
ENSMUSG00000085860	2410003L11Rik	11	97598511	1	11 D	NA	misc_11	P	TRUE	TRUE	TRUE	0.0212816	0.0712598	FALSE
ENSMUSG00000023885	Thbs2	17	14665500	-1	17 A2	NA	prox_17	M	TRUE	TRUE	TRUE	0.0513326	0.124934	FALSE
ENSMUSG00000040284	Gzmg	14	56156582	-1	NA	NA	prox_14	M	TRUE	TRUE	TRUE	0.00663825	0.139388	FALSE
ENSMUSG00000028339	Col15a1	4	47208161	1	NA	NA	misc_4	M	TRUE	TRUE	TRUE	0.131898	0.293444	FALSE
ENSMUSG00000037202	Prf1	10	61297833	1	NA	NA	mid_10	M	TRUE	TRUE	TRUE	0.00332376	0.3424	FALSE
ENSMUSG00000061186	Sfmbt2	2	10370510	1	2 A1	NA	prox_2	P	TRUE	TRUE	TRUE	0.029889	0.345726	FALSE
ENSMUSG00000092035	Peg10	6	4747306	1	6 A1	NA	prox_6	P	TRUE	TRUE	TRUE	0.000271755	0.345726	FALSE
ENSMUSG00000042607	Asb4	6	5383386	1	6 A1	NA	prox_6	M	TRUE	TRUE	TRUE	0.0338078	0.345726	FALSE
ENSMUSG00000061469	Gm12569	11	51220473	1	11 B1.3	NA	misc_11	P	TRUE	TRUE	TRUE	0.163294	0.345726	FALSE
ENSMUSG00000027955	Gask1b	3	79884533	1	3 E3	NA	misc_3	P	TRUE	TRUE	TRUE	0.127514	0.349727	FALSE
ENSMUSG00000020399	Havcr2	11	46454935	1	NA	NA	misc_11	M	TRUE	TRUE	TRUE	-0.0482498	0.349727	FALSE
ENSMUSG00000075010	AW112010	19	11047617	-1	NA	NA	misc_19	M	TRUE	TRUE	TRUE	0.182805	0.349727	FALSE
ENSMUSG00000030579	Tyrobp	7	30413760	1	NA	NA	misc_7	M	TRUE	TRUE	TRUE	0.138761	0.386243	FALSE
ENSMUSG00000027520	Zdbf2	1	63273265	1	1 C2	GPR1	cent_1	P	TRUE	TRUE	TRUE	0.0447074	0.411207	FALSE
ENSMUSG00000016458	Wt1	2	105126529	1	2 E2-E3	NA	prox_2	M	TRUE	TRUE	TRUE	0.0602654	0.411207	FALSE
ENSMUSG00000002266	Zim1	7	6671269	-1	7 A2-B1	NA	prox_7	M	TRUE	TRUE	TRUE	0.00166762	0.411207	FALSE
ENSMUSG00000000031	H19	7	142575529	-1	7 F5	NA	dist_7	M	TRUE	TRUE	TRUE	0.000658389	0.411207	FALSE
ENSMUSG00000000154	Slc22a18	7	143473736	1	7 F5	NA	dist_7	M	TRUE	TRUE	TRUE	0.0208865	0.426895	FALSE
ENSMUSG00000000290	Itgb2	10	77530252	1	NA	NA	mid_10	M	TRUE	TRUE	TRUE	0.0931692	0.539046	FALSE
ENSMUSG00000027551	Zfp64	2	168893331	-1	2 H3	NA	dist_2	P	TRUE	TRUE	TRUE	0.0764951	0.56174	FALSE
ENSMUSG00000029304	Spp1	5	104435118	1	NA	NA	misc_5	M	TRUE	TRUE	TRUE	-0.00164932	0.56174	FALSE
ENSMUSG00000021136	Smoc1	12	81026808	1	12 D1	NA	misc_12	P	TRUE	TRUE	TRUE	-0.012268	0.56174	FALSE
ENSMUSG00000023861	Mpc1	17	8282904	1	17A1	NA	prox_17	M	TRUE	TRUE	TRUE	0.0283147	0.56174	FALSE
ENSMUSG00000083219	Gm11410	4	80003989	1	NA	NA	misc_4	M	TRUE	TRUE	TRUE	-0.00973876	0.567087	FALSE
ENSMUSG00000032827	Ppp1r9a	6	4902917	1	6 A1	NA	prox_6	M	TRUE	TRUE	TRUE	0.0148547	0.567087	FALSE
ENSMUSG00000019817	Plagl1	10	13060504	1	10 A2	NA	cent_10	P	TRUE	TRUE	TRUE	-0.00167829	0.567087	FALSE
ENSMUSG00000022156	Gzme	14	56117626	-1	NA	NA	prox_14	M	TRUE	TRUE	TRUE	0.0172109	0.567087	FALSE
ENSMUSG00000023830	Igf2r	17	12682406	-1	17 A1	NA	prox_17	M	TRUE	TRUE	TRUE	0.00725553	0.567087	FALSE
ENSMUSG00000040856	Dlk1	12	109452823	1	12 F1	NA	dist_12	P	TRUE	TRUE	TRUE	-0.00176098	0.59162	FALSE
ENSMUSG00000022952	Runx1	16	92601466	-1	16 C4	NA	misc_16	P	TRUE	TRUE	TRUE	0.115512	0.597217	FALSE
ENSMUSG00000051855	Mest	6	30723547	1	6 A3	NA	prox_6	isoform-specific	TRUE	TRUE	TRUE	-0.000384785	0.599846	FALSE
ENSMUSG00000073494	Sh2d1b2	1	170232749	1	NA	NA	misc_1	M	TRUE	TRUE	TRUE	0.0238095	0.616858	FALSE
ENSMUSG00000002265	Peg3	7	6703892	-1	7 A2-B1	NA	prox_7	P	TRUE	TRUE	TRUE	0.000306343	0.616858	FALSE
ENSMUSG00000045752	Tssc4	7	143069249	1	7 F5	NA	dist_7	M	TRUE	TRUE	TRUE	-0.0516215	0.616858	FALSE
ENSMUSG00000079186	Gzmc	14	56231441	-1	NA	NA	prox_14	M	TRUE	TRUE	TRUE	0.00157233	0.616858	FALSE
ENSMUSG00000097694	G730013B05Rik	16	50526245	1	16 B5	NA	cent_16	P	TRUE	TRUE	TRUE	0.0279029	0.616858	FALSE
ENSMUSG00000004631	Sgce	6	4674350	-1	6 A1	NA	prox_6	P	TRUE	TRUE	TRUE	-0.00428343	0.621371	FALSE
ENSMUSG00000085925	Rtl1	12	109589193	-1	12 F1	NA	dist_12	P	TRUE	TRUE	TRUE	0.00346212	0.704405	FALSE
ENSMUSG00000041773	Enc1	13	97241105	1	13 D1	NA	dist_13	P	TRUE	TRUE	TRUE	-0.00271216	0.708979	FALSE
ENSMUSG00000045362	Tnfrsf26	7	143607659	-1	7 F5	NA	dist_7	M	TRUE	TRUE	TRUE	0.0303151	0.710584	FALSE
ENSMUSG00000042814	Mcts2	2	152687035	1	2 H1	NA	dist_2	P	TRUE	TRUE	TRUE	0.0310348	0.728678	FALSE
ENSMUSG00000048583	Igf2	7	142650766	-1	7 F5	NA	dist_7	P	TRUE	TRUE	TRUE	0.00107412	0.728678	FALSE
ENSMUSG00000086748	Gm13261	2	10339283	-1	NA	NA	prox_2	P	TRUE	TRUE	TRUE	0.0821668	0.729475	FALSE
ENSMUSG00000019188	H13	2	152669461	1	2 H1	NA	dist_2	isoform-specific	TRUE	TRUE	TRUE	-0.00473572	0.729475	FALSE
ENSMUSG00000024423	Impact	18	12955852	1	18 A2-B2	NA	cent_18	P	TRUE	TRUE	TRUE	0.0216461	0.729475	FALSE
ENSMUSG00000024610	Cd74	18	60803848	1	NA	NA	misc_18	M	TRUE	TRUE	TRUE	0.0911827	0.743982	FALSE
ENSMUSG00000081833	Gm13669	2	75808358	1	NA	NA	prox_2	M	TRUE	TRUE	TRUE	0.00504961	0.752901	FALSE
ENSMUSG00000028581	Laptm5	4	130913125	1	NA	NA	misc_4	M	TRUE	TRUE	TRUE	-0.0570283	0.752901	FALSE
ENSMUSG00000051527	Usp29	7	6730578	1	7 A2-B1	NA	prox_7	P	TRUE	TRUE	TRUE	-0.00488905	0.752901	FALSE
ENSMUSG00000000948	Gm38393	7	59974149	-1	7 C-B5	NA	cent_7	P	TRUE	TRUE	TRUE	-0.0209159	0.752901	FALSE
ENSMUSG00000102252	Snrpn	7	59982495	-1	7 C-B5	SNURF-SNRPN	cent_7	P	TRUE	TRUE	TRUE	-0.00965835	0.752901	FALSE
ENSMUSG00000086266	Igf2os	7	142659693	1	7 F5	NA	dist_7	P	TRUE	TRUE	TRUE	0.00450776	0.752901	FALSE
ENSMUSG00000031714	Gab1	8	80764438	-1	8 C2	NA	misc_8	P	TRUE	TRUE	TRUE	0.000617534	0.752901	FALSE
ENSMUSG00000059256	Gzmd	14	56129556	-1	NA	NA	prox_14	M	TRUE	TRUE	TRUE	-0.0044005	0.752901	FALSE
ENSMUSG00000069729	Arid1b	17	4994332	1	17 A1	NA	prox_17	M	TRUE	TRUE	TRUE	0.00441418	0.752901	FALSE
ENSMUSG00000001865	Cpa3	3	20215620	-1	NA	NA	misc_3	M	TRUE	TRUE	TRUE	-0.0510862	0.768947	FALSE
ENSMUSG00000000214	Th	7	142892752	-1	7 F5	NA	dist_7	M	TRUE	TRUE	TRUE	-0.0465826	0.768947	FALSE
ENSMUSG00000025764	Jade1	3	41555731	1	3 B	NA	cent_3	P	TRUE	TRUE	TRUE	-0.00133819	0.771675	FALSE
ENSMUSG00000010760	Phlda2	7	143501545	-1	7 F5	NA	dist_7	M	TRUE	TRUE	TRUE	0.0364922	0.793415	FALSE
ENSMUSG00000106847	Peg13	15	72805600	-1	15 D3	NA	cent_15	P	TRUE	TRUE	TRUE	0.0013207	0.875754	FALSE
ENSMUSG00000029664	Tfpi2	6	3962595	-1	6 A1	NA	prox_6	M	TRUE	TRUE	TRUE	-0.0380246	0.875871	FALSE
ENSMUSG00000044068	Zrsr1	11	22972005	1	11 A3	NA	prox_11	P	TRUE	TRUE	TRUE	0.00488669	0.875871	FALSE
ENSMUSG00000097451	Rian	12	109603940	1	12 F1	NA	dist_12	M	TRUE	TRUE	TRUE	0.000857169	0.875871	FALSE
ENSMUSG00000015189	Casd1	6	4600839	1	6 A1	NA	prox_6	M	TRUE	TRUE	TRUE	-0.0246167	0.890332	FALSE
ENSMUSG00000021268	Meg3	12	109541001	1	12 F1	NA	dist_12	M	TRUE	TRUE	TRUE	0.00121057	0.890332	FALSE
ENSMUSG00000089769	Gm16574	17	12818793	1	NA	NA	prox_17	P	TRUE	TRUE	TRUE	-0.017507	0.890332	FALSE
ENSMUSG00000031075	Ano1	7	144588549	-1	7 F5	NA	dist_7	M	TRUE	TRUE	TRUE	-0.00496619	0.916215	FALSE
ENSMUSG00000018259	Prl8a2	13	27345673	1	NA	NA	cent_13	M	TRUE	TRUE	TRUE	-0.00868508	0.916215	FALSE
ENSMUSG00000037280	Galnt6	15	100691813	-1	15 F1	NA	misc_15	P	TRUE	TRUE	TRUE	-0.00495413	0.93235	FALSE
ENSMUSG00000062866	Phactr2	10	13207717	-1	10 A1	NA	cent_10	M	TRUE	TRUE	TRUE	-0.00723253	0.945713	FALSE
ENSMUSG00000026395	Ptprc	1	138062861	-1	NA	NA	misc_1	M	TRUE	TRUE	TRUE	-0.0059916	0.96573	FALSE
ENSMUSG00000020176	Grb10	11	11930508	-1	11 A1	NA	prox_11	isoform-specific	TRUE	TRUE	TRUE	0.00652717	0.96573	FALSE
ENSMUSG00000043439	Epop	11	97627389	-1	NA	NA	misc_11	P	TRUE	TRUE	TRUE	0.0226854	0.969392	FALSE
ENSMUSG00000029096	Htra3	5	35652023	-1	5 B3	NA	prox_5	M	TRUE	TRUE	TRUE	-0.0225161	0.974194	FALSE
ENSMUSG00000029775	Klhdc10	6	30401868	1	6 A3	NA	prox_6	M	TRUE	TRUE	TRUE	-0.0112682	0.974194	FALSE
ENSMUSG00000022464	Slc38a4	15	96994820	-1	15 F1	NA	misc_15	P	TRUE	TRUE	TRUE	0.00944724	0.974194	FALSE
ENSMUSG00000056071	S100a9	3	90692632	-1	NA	NA	misc_3	M	TRUE	TRUE	TRUE	-0.061882	0.992689	FALSE
ENSMUSG00000009545	Kcnq1	7	143106362	1	7 F5	NA	dist_7	M	TRUE	TRUE	TRUE	-0.01146	0.992689	FALSE
ENSMUSG00000032359	Ctsh	9	90054152	1	9 E3.1	NA	dist_9	P	TRUE	TRUE	TRUE	0.0120863	0.992689	FALSE
ENSMUSG00000097391	Mirg	12	109729764	1	12 F1	Mirg	dist_12	M	TRUE	TRUE	TRUE	-0.00347762	0.992689	FALSE
ENSMUSG00000082536	Gm13456	2	40555752	1	NA	NA	prox_2	M	TRUE	TRUE	TRUE	0.00186945	0.99516	FALSE
ENSMUSG00000105260	Gm40040	3	41477577	-1	NA	NA	cent_3	P	TRUE	TRUE	TRUE	0.028059	0.99516	FALSE
ENSMUSG00000040013	Fkbp6	5	135291704	-1	5 G2	NA	misc_5	P	TRUE	TRUE	TRUE	-0.0340956	0.99516	FALSE
ENSMUSG00000100826	Snhg14	7	59307924	-1	7 C-B5	NA	cent_7	P	TRUE	TRUE	TRUE	0.0135065	0.99516	FALSE
ENSMUSG00000045777	Ifitm10	7	142325837	-1	7 F5	NA	dist_7	M	TRUE	TRUE	TRUE	-0.0155848	0.99516	FALSE
ENSMUSG00000023826	Prkn	17	10840384	1	17 A1	NA	prox_17	M	TRUE	TRUE	TRUE	-0.0548086	0.99516	FALSE
ENSMUSG00000078247	Airn	17	12741311	1	17 A1	NA	prox_17	P	TRUE	TRUE	TRUE	0.00143989	0.99516	FALSE
ENSMUSG00000087119	Atg4a-ps	3	103643954	-1	NA	NA	misc_3	M	TRUE	TRUE	TRUE	0	1	FALSE
ENSMUSG00000101609	Kcnq1ot1	7	143203458	-1	7 F5	NA	dist_7	P	TRUE	TRUE	TRUE	0	1	FALSE
ENSMUSG00000025967	Eef1b2	1	63176825	1	1 C2	GPR1	cent_1	P	TRUE	FALSE	FALSE	-0.000576438	NA	FALSE
ENSMUSG00000046856	Gpr1	1	63182691	-1	1 C2	GPR1	cent_1	P	TRUE	FALSE	FALSE	-0.00712664	NA	FALSE
ENSMUSG00000025964	Adam23	1	63445891	1	1 C2	GPR1	cent_1	P	TRUE	FALSE	FALSE	-0.00569727	NA	FALSE
ENSMUSG00000026470	Stx6	1	155158715	1	1 G3	NA	misc_1	M	TRUE	FALSE	FALSE	0.0131511	NA	FALSE
ENSMUSG00000033722	BC034090	1	155212471	-1	1 G3	NA	misc_1	M	TRUE	FALSE	FALSE	-0.0462237	NA	FALSE
ENSMUSG00000026970	Rbms1	2	60750193	-1	2 C1.2	NA	prox_2	P	TRUE	FALSE	FALSE	-0.00853027	NA	FALSE
ENSMUSG00000040093	Bmf	2	118528757	-1	NA	NA	prox_2	M	TRUE	FALSE	FALSE	0.0163951	NA	FALSE
ENSMUSG00000042745	Id1	2	152736251	1	2 H1	NA	dist_2	P	TRUE	FALSE	FALSE	-0.0136352	NA	FALSE
ENSMUSG00000009876	Cox4i2	2	152754173	1	2 H1	NA	dist_2	P	TRUE	FALSE	FALSE	0.0150137	NA	FALSE
ENSMUSG00000007659	Bcl2l1	2	152780668	-1	2 H1	NA	dist_2	P	TRUE	FALSE	FALSE	0.00355236	NA	FALSE
ENSMUSG00000027469	Tpx2	2	152847964	1	2 H1	NA	dist_2	P	TRUE	FALSE	FALSE	-0.0126994	NA	FALSE
ENSMUSG00000067787	Blcap	2	157556362	-1	2 H1	NA	dist_2	isoform-specific	TRUE	FALSE	FALSE	3.6768e-05	NA	FALSE
ENSMUSG00000027522	Stx16	2	174076308	1	2 H4	NA	dist_2	M	TRUE	FALSE	FALSE	-0.00399469	NA	FALSE
ENSMUSG00000039263	Npepl1	2	174110349	1	2 H4	NA	dist_2	M	TRUE	FALSE	FALSE	0.0164325	NA	FALSE
ENSMUSG00000086537	Nespas	2	174281237	-1	2 H4	Gnas	dist_2	P	TRUE	TRUE	FALSE	0.0416667	NA	FALSE
ENSMUSG00000027523	Gnas	2	174284320	1	2 H4	Gnas	dist_2	M	TRUE	FALSE	FALSE	0.0271863	NA	FALSE
ENSMUSG00000028078	Dclk2	3	86786151	-1	NA	NA	misc_3	M	TRUE	FALSE	FALSE	-0.044895	NA	FALSE
ENSMUSG00000028859	Csf3r	4	126024550	1	NA	NA	misc_4	M	TRUE	TRUE	FALSE	-0.0291667	NA	FALSE
ENSMUSG00000037221	Mospd3	5	137596645	-1	5 G2	NA	misc_5	P	TRUE	FALSE	FALSE	-0.0364066	NA	FALSE
ENSMUSG00000042817	Flt3	5	147330741	-1	NA	NA	misc_5	P	TRUE	FALSE	FALSE	0.00802146	NA	FALSE
ENSMUSG00000025607	Copg2	6	30747554	-1	6 A3	NA	prox_6	M	TRUE	FALSE	FALSE	0.0292274	NA	FALSE
ENSMUSG00000029804	Herc3	6	58831465	1	6 B3	NA	prox_6	isoform-specific	TRUE	FALSE	FALSE	0.0103789	NA	FALSE
ENSMUSG00000025889	Snca	6	60731575	-1	NA	NA	prox_6	M	TRUE	FALSE	FALSE	0.0190412	NA	FALSE
ENSMUSG00000030199	Etv6	6	134035700	1	6 G1	NA	dist_6	P	TRUE	FALSE	FALSE	-0.0148916	NA	FALSE
ENSMUSG00000002602	Axl	7	25757273	-1	7 A3-B1	NA	misc_7	M	TRUE	FALSE	FALSE	0.0166008	NA	FALSE
ENSMUSG00000025326	Ube3a	7	59228750	1	7 C-B5	NA	cent_7	M	TRUE	FALSE	FALSE	-0.00978492	NA	FALSE
ENSMUSG00000070527	Mkrn3	7	62417593	-1	7 C-B5	NA	cent_7	P	TRUE	FALSE	FALSE	0.0380952	NA	FALSE
ENSMUSG00000030638	Sh3gl3	7	82173840	1	7 D3	NA	misc_7	P	TRUE	FALSE	FALSE	-0.0265873	NA	FALSE
ENSMUSG00000030782	Tgfb1i1	7	128246812	1	7 F3	NA	distcent_7	M	TRUE	FALSE	FALSE	-0.0494246	NA	FALSE
ENSMUSG00000030847	Bag3	7	128523616	1	7 F3	NA	distcent_7	M	TRUE	FALSE	FALSE	0.00456599	NA	FALSE
ENSMUSG00000042105	Inpp5f	7	128611328	1	7 F3	NA	distcent_7	P	TRUE	FALSE	FALSE	-0.0109315	NA	FALSE
ENSMUSG00000037706	Cd81	7	143052739	1	7 F5	NA	dist_7	M	TRUE	FALSE	FALSE	-0.0034141	NA	FALSE
ENSMUSG00000059119	Nap1l4	7	143513579	-1	7 F5	NA	dist_7	M	TRUE	FALSE	FALSE	-0.0167447	NA	FALSE
ENSMUSG00000037606	Osbpl5	7	143688762	-1	7 F5	NA	dist_7	M	TRUE	FALSE	FALSE	0.0118716	NA	FALSE
ENSMUSG00000031665	Sall1	8	89027235	-1	NA	NA	misc_8	P	TRUE	FALSE	FALSE	0.0490909	NA	FALSE
ENSMUSG00000040111	Gramd1b	9	40293233	-1	9 A5.1	NA	misc_9	P	TRUE	FALSE	FALSE	0.019006	NA	FALSE
ENSMUSG00000032299	Commd4	9	57155035	-1	NA	NA	misc_9	P	TRUE	FALSE	FALSE	-0.022458	NA	FALSE
ENSMUSG00000032280	Tle3	9	61372366	1	9 B	NA	misc_9	P	TRUE	FALSE	FALSE	0.0029929	NA	FALSE
ENSMUSG00000032422	Snx14	9	88376750	-1	9 E3.1	NA	dist_9	P	TRUE	FALSE	FALSE	0.0187948	NA	FALSE
ENSMUSG00000019795	Pcmt1	10	7629373	-1	10 A1	NA	misc_10	P	TRUE	FALSE	FALSE	-0.00912835	NA	FALSE
ENSMUSG00000019814	Ltv1	10	13178140	-1	NA	NA	cent_10	M	TRUE	FALSE	FALSE	-0.00853034	NA	FALSE
ENSMUSG00000025383	Il23a	10	128296139	-1	NA	NA	dist_10	M	TRUE	TRUE	FALSE	-0.0404549	NA	FALSE
ENSMUSG00000025348	Itga7	10	128933818	1	NA	NA	dist_10	M	TRUE	FALSE	FALSE	0.0336638	NA	FALSE
ENSMUSG00000020173	Cobl	11	12236608	-1	11 A1	NA	prox_11	M	TRUE	FALSE	FALSE	-0.0168091	NA	FALSE
ENSMUSG00000051355	Commd1	11	22896136	-1	11 A3	NA	prox_11	isoform-specific	TRUE	FALSE	FALSE	-0.013955	NA	FALSE
ENSMUSG00000086646	Platr20	11	51189833	-1	11 B1.3	NA	misc_11	P	TRUE	FALSE	FALSE	-0.0260535	NA	FALSE
ENSMUSG00000045942	BC049762	11	51253651	-1	11 B1.3	NA	misc_11	P	TRUE	FALSE	FALSE	-0.0239151	NA	FALSE
ENSMUSG00000020634	Ubxn2a	12	4879032	-1	NA	NA	prox_12	P	TRUE	FALSE	FALSE	0.0167729	NA	FALSE
ENSMUSG00000015143	Actn1	12	80167547	-1	12 C3	NA	misc_12	P	TRUE	FALSE	FALSE	0.0156956	NA	FALSE
ENSMUSG00000021266	Wars	12	108860030	-1	12 F1	NA	dist_12	P	TRUE	FALSE	FALSE	-0.0205479	NA	FALSE
ENSMUSG00000075707	Dio3	12	110279068	1	12 F1	NA	dist_12	P	TRUE	FALSE	FALSE	0.0182756	NA	FALSE
ENSMUSG00000017843	Ppp2r5c	12	110447120	1	12 F1	NA	dist_12	P	TRUE	FALSE	FALSE	0.00330106	NA	FALSE
ENSMUSG00000018707	Dync1h1	12	110601452	1	12 F1	NA	dist_12	P	TRUE	FALSE	FALSE	-0.00101575	NA	FALSE
ENSMUSG00000104213	Ighd	12	113406604	-1	NA	NA	dist_12	M	TRUE	TRUE	FALSE	-0.00833333	NA	FALSE
ENSMUSG00000016477	E2f3	13	29906575	-1	13 A3.2	NA	cent_13	P	TRUE	FALSE	FALSE	0.0211956	NA	FALSE
ENSMUSG00000047842	Diras2	13	52504380	-1	NA	NA	cent_13	M	TRUE	FALSE	FALSE	0.0230481	NA	FALSE
ENSMUSG00000021699	Pde4d	13	108449948	1	13 D2	NA	dist_13	P	TRUE	FALSE	FALSE	0.00223215	NA	FALSE
ENSMUSG00000022139	Mbnl2	14	120275669	1	14 E4	NA	misc_14	P	TRUE	FALSE	FALSE	-0.0165525	NA	FALSE
ENSMUSG00000068391	Chrac1	15	73090392	1	15 D3	NA	cent_15	M	TRUE	FALSE	FALSE	0.031898	NA	FALSE
ENSMUSG00000036698	Ago2	15	73095844	-1	15 D3	NA	cent_15	M	TRUE	FALSE	FALSE	0.00354748	NA	FALSE
ENSMUSG00000000489	Pdgfb	15	79995874	-1	15 E1	NA	cent_15	P	TRUE	FALSE	FALSE	0.0334477	NA	FALSE
ENSMUSG00000023169	Slc38a1	15	96571418	-1	15 F1	NA	misc_15	P	TRUE	FALSE	FALSE	0.00593895	NA	FALSE
ENSMUSG00000022462	Slc38a2	15	96687392	-1	15 F1	NA	misc_15	P	TRUE	FALSE	FALSE	-0.00939088	NA	FALSE
ENSMUSG00000022641	Bbx	16	50191844	-1	16 B5	NA	cent_16	P	TRUE	FALSE	FALSE	-0.00280555	NA	FALSE
ENSMUSG00000022639	Dubr	16	50719294	-1	NA	NA	cent_16	P	TRUE	FALSE	FALSE	0.0020271	NA	FALSE
ENSMUSG00000034265	Zdhhc14	17	5492557	1	17A1	NA	prox_17	M	TRUE	FALSE	FALSE	-0.00376248	NA	FALSE
ENSMUSG00000062078	Qk	17	10202601	-1	17 A1	NA	prox_17	M	TRUE	FALSE	FALSE	-0.0115266	NA	FALSE
ENSMUSG00000073460	Pnldc1	17	12888902	-1	NA	NA	prox_17	M	TRUE	TRUE	FALSE	0.0389881	NA	FALSE
ENSMUSG00000024140	Epas1	17	86753700	1	17 E4	NA	cent_17	P	TRUE	FALSE	FALSE	-0.000267909	NA	FALSE
ENSMUSG00000048720	Tbc1d12	19	38836579	1	19 C3	NA	cent_19	P	TRUE	FALSE	FALSE	-0.0186247	NA	FALSE
ENSMUSG00000026358	Rgs1	1	144242296	-1	NA	NA	misc_1	M	FALSE	NA	FALSE	NA	NA	NA
ENSMUSG00000026471	Mr1	1	155127277	-1	1 G3	NA	misc_1	M	TRUE	FALSE	FALSE	-0.0514558	NA	NA
ENSMUSG00000026581	Sell	1	164061982	1	NA	NA	misc_1	M	FALSE	NA	FALSE	NA	NA	NA
ENSMUSG00000038421	Fcrla	1	170917576	-1	NA	NA	misc_1	M	FALSE	NA	FALSE	NA	NA	NA
NA	Zdbf2linc	1	NA	NA	1 C2	GPR1	cent_1	P	FALSE	NA	FALSE	NA	NA	NA
NA	XLOC_047844	2	10308628	-1	2	NA	prox_2	P	FALSE	NA	FALSE	NA	NA	NA
ENSMUSG00000026770	Il2ra	2	11642807	1	NA	NA	prox_2	M	FALSE	NA	FALSE	NA	NA	NA
ENSMUSG00000087701	Gm13493	2	51871126	-1	NA	NA	prox_2	M	TRUE	NA	FALSE	NaN	NA	NA
ENSMUSG00000027199	Gatm	2	122594467	-1	2 E5	NA	prox_2	M	FALSE	NA	FALSE	NA	NA	NA
ENSMUSG00000068129	Cst7	2	150570415	1	NA	NA	dist_2	M	FALSE	NA	FALSE	NA	NA	NA
ENSMUSG00000067786	Nnat	2	157560078	1	2 H1	NA	dist_2	P	TRUE	NA	FALSE	NaN	NA	NA
ENSMUSG00000074622	Mafb	2	160363703	-1	2 H2	NA	dist_2	M	FALSE	NA	FALSE	NA	NA	NA
ENSMUSG00000008999	Bmp7	2	172868012	-1	2 H3	NA	dist_2	P	TRUE	FALSE	FALSE	0.0934123	NA	NA
ENSMUSG00000065521	Mir296	2	174267047	-1	2 H4	Gnas	dist_2	P	FALSE	NA	FALSE	NA	NA	NA
ENSMUSG00000065410	Mir298	2	174267504	-1	2 H4	Gnas	dist_2	P	FALSE	NA	FALSE	NA	NA	NA
ENSMUSG00000027524	Edn3	2	174760619	1	2 H4	Gnas	dist_2	P	FALSE	NA	FALSE	NA	NA	NA
NA	NESP55	2	NA	NA	2 H4	Gnas	dist_2	M	FALSE	NA	FALSE	NA	NA	NA
NA	GNASXL	2	NA	NA	2 H4	Gnas	dist_2	P	FALSE	NA	FALSE	NA	NA	NA
NA	Exon-1A	2	NA	NA	2 H4	Gnas	dist_2	P	FALSE	NA	FALSE	NA	NA	NA
NA	GS-alpha	2	NA	NA	2 H4	Gnas	dist_2	M	FALSE	NA	FALSE	NA	NA	NA
NA	F7	2	NA	NA	2 H4	Gnas	dist_2	M	FALSE	NA	FALSE	NA	NA	NA
ENSMUSG00000097639	Platr4	3	41484024	-1	3 B	NA	cent_3	P	TRUE	FALSE	FALSE	-0.133039	NA	NA
ENSMUSG00000106223	2400006e01Rik	3	41521247	-1	3 B	NA	cent_3	P	FALSE	NA	FALSE	NA	NA	NA
ENSMUSG00000097287	D130017N08Rik	5	143758354	1	5 G2	NA	misc_5	P	FALSE	NA	FALSE	NA	NA	NA
ENSMUSG00000023964	Calcr	6	3685680	-1	6 A1	NA	prox_6	M	FALSE	NA	FALSE	NA	NA	NA
ENSMUSG00000065501	Mir335	6	30741299	1	6 A3	NA	prox_6	P	FALSE	NA	FALSE	NA	NA	NA
ENSMUSG00000039032	Tsga13	6	30896981	-1	6 A3.3	NA	prox_6	M	FALSE	NA	FALSE	NA	NA	NA
ENSMUSG00000076490	Trbc1	6	41538218	1	NA	NA	prox_6	M	FALSE	NA	FALSE	NA	NA	NA
ENSMUSG00000055430	Nap1l5	6	58905233	-1	6 C1	NA	prox_6	P	FALSE	NA	FALSE	NA	NA	NA
ENSMUSG00000030114	Klrg1	6	122270596	-1	NA	NA	dist_6	M	FALSE	NA	FALSE	NA	NA	NA
ENSMUSG00000108090	Gm6637	6	122295664	1	NA	NA	dist_6	M	FALSE	NA	FALSE	NA	NA	NA
NA	Copg2os1	6	NA	NA	6 A3	NA	prox_6	P	FALSE	NA	FALSE	NA	NA	NA
ENSMUSG00000108113	Zim2	7	6651748	-1	7 A2-B1	NA	prox_7	M	FALSE	NA	FALSE	NA	NA	NA
ENSMUSG00000108043	Zim3	7	6955685	-1	7 A2-B1	NA	prox_7	M	FALSE	NA	FALSE	NA	NA	NA
ENSMUSG00000109176	Zfp264	7	6977246	1	7 A2-B1	NA	prox_7	P	FALSE	NA	FALSE	NA	NA	NA
ENSMUSG00000077191	Snord64	7	59978808	-1	7C-B5	SNURF-SNRPN	cent_7	P	FALSE	NA	FALSE	NA	NA	NA
ENSMUSG00000089375	Snord107	7	59980876	-1	7C-B5	SNURF-SNRPN	cent_7	P	FALSE	NA	FALSE	NA	NA	NA
ENSMUSG00000102627	Snurf	7	59995449	-1	7 C-B5	SNURF-SNRPN	cent_7	P	FALSE	NA	FALSE	NA	NA	NA
NA	XLOC_075991	7	60641818	-1	7	NA	cent_7	P	FALSE	NA	FALSE	NA	NA	NA
ENSMUSG00000109006	B230209E15Rik	7	61529871	-1	7 C-B5	NA	cent_7	P	FALSE	NA	FALSE	NA	NA	NA
ENSMUSG00000109394	A230057D06Rik	7	61704519	-1	7 C-B5	NA	cent_7	P	FALSE	NA	FALSE	NA	NA	NA
ENSMUSG00000109321	A330076H08Rik	7	61930137	-1	7 C-B5	NA	cent_7	P	FALSE	NA	FALSE	NA	NA	NA
ENSMUSG00000045813	Gm9801	7	62094506	-1	7 C-B5	NA	cent_7	P	FALSE	NA	FALSE	NA	NA	NA
ENSMUSG00000030724	Cd19	7	126408450	-1	NA	NA	distcent_7	M	FALSE	NA	FALSE	NA	NA	NA
ENSMUSG00000018819	Lsp1	7	142460809	1	7 F5	NA	dist_7	M	TRUE	FALSE	FALSE	0.0829762	NA	NA
ENSMUSG00000087090	Nctc1	7	142544609	-1	7 F5	NA	dist_7	P	FALSE	NA	FALSE	NA	NA	NA
ENSMUSG00000000215	Ins2	7	142678656	-1	7 F5	NA	dist_7	P	FALSE	NA	FALSE	NA	NA	NA
ENSMUSG00000059277	R74862	7	143021784	-1	7 F5	NA	dist_7	M	FALSE	NA	FALSE	NA	NA	NA
NA	AF313042	7	143462528	NA	7 F5	NA	dist_7	M	FALSE	NA	FALSE	NA	NA	NA
ENSMUSG00000109251	E230032D23Rik	7	143628024	1	7	NA	dist_7	M	FALSE	NA	FALSE	NA	NA	NA
ENSMUSG00000010751	Tnfrsf22	7	143634806	-1	7 F5	NA	dist_7	M	TRUE	FALSE	FALSE	-0.0700831	NA	NA
ENSMUSG00000037613	Tnfrsf23	7	143665809	-1	7 F5	NA	dist_7	M	TRUE	FALSE	FALSE	-0.0530652	NA	NA
NA	Peg3os	7	NA	NA	7 A1	NA	prox_7	P	FALSE	NA	FALSE	NA	NA	NA
NA	Mkrn3os	7	NA	NA	7C-B5	NA	cent_7	P	FALSE	NA	FALSE	NA	NA	NA
NA	BM117114	7	NA	NA	7C-B5	NA	cent_7	P	FALSE	NA	FALSE	NA	NA	NA
NA	Pec2	7	NA	NA	7C-B5	NA	cent_7	P	FALSE	NA	FALSE	NA	NA	NA
NA	BB077283	7	NA	NA	7C-B5	NA	cent_7	P	FALSE	NA	FALSE	NA	NA	NA
NA	Pec3	7	NA	NA	7C-B5	NA	cent_7	P	FALSE	NA	FALSE	NA	NA	NA
NA	Snord116_cluster	7	NA	NA	7C-B5	pwcr1	cent_7	P	FALSE	NA	FALSE	NA	NA	NA
NA	Snord115_cluster	7	NA	NA	7C-B5	pwcr1	cent_7	P	FALSE	NA	FALSE	NA	NA	NA
NA	U80893	7	NA	NA	7C-B5	NA	cent_7	P	FALSE	NA	FALSE	NA	NA	NA
NA	PIHit	7	NA	NA	7 F5	NA	dist_7	P	FALSE	NA	FALSE	NA	NA	NA
NA	Tsci1	8	80859408	1	8	NA	misc_8	P	FALSE	NA	FALSE	NA	NA	NA
ENSMUSG00000031962	Cdh15	8	122847966	1	8 E1	NA	misc_8	isoform-specific	FALSE	NA	FALSE	NA	NA	NA
ENSMUSG00000032094	Cd3d	9	44981786	1	NA	NA	misc_9	M	FALSE	NA	FALSE	NA	NA	NA
ENSMUSG00000040204	Pclaf	9	65890237	1	NA	NA	misc_9	P	TRUE	FALSE	FALSE	0.0548967	NA	NA
ENSMUSG00000065596	Mir184	9	89802260	-1	9 E3.1	NA	dist_9	P	FALSE	NA	FALSE	NA	NA	NA
ENSMUSG00000098627	4930524O08Rik	9	89826519	1	9 E3.1	NA	dist_9	P	FALSE	NA	FALSE	NA	NA	NA
ENSMUSG00000032356	Rasgrf1	9	89909908	1	9 E3.1	NA	dist_9	P	TRUE	TRUE	FALSE	-0.140146	NA	NA
ENSMUSG00000032454	Rbp2	9	98486115	1	9 E3.3	NA	dist_9	P	FALSE	NA	FALSE	NA	NA	NA
NA	AS4	9	NA	1	9 E3.1	NA	dist_9	P	FALSE	NA	FALSE	NA	NA	NA
ENSMUSG00000020182	Ddc	11	11814101	-1	11 A1	NA	prox_11	P	TRUE	TRUE	FALSE	-0.251768	NA	NA
NA	XLOC_011039	11	12037523	1	11	NA	misc_11	M	FALSE	NA	FALSE	NA	NA	NA
NA	Tsci2	11	12151320	1	11	NA	misc_11	M	FALSE	NA	FALSE	NA	NA	NA
ENSMUSG00000051650	B3gnt2	11	22759738	-1	11 A3.2	NA	prox_11	M	FALSE	NA	FALSE	NA	NA	NA
ENSMUSG00000036545	Adamts2	11	50602084	1	11 B1.3	NA	misc_11	P	TRUE	FALSE	FALSE	0.1549	NA	NA
ENSMUSG00000035112	Wnk4	11	101260567	1	11 D	NA	misc_11	M	TRUE	FALSE	FALSE	0.0699815	NA	NA
ENSMUSG00000039963	Ccdc40	11	119228572	1	11 E2	NA	misc_11	P	FALSE	NA	FALSE	NA	NA	NA
ENSMUSG00000066632	Pgk1-rs7	12	10898986	-1	NA	NA	misc_12	M	FALSE	NA	FALSE	NA	NA	NA
ENSMUSG00000112546	Gm6992	12	31018218	1	NA	NA	misc_12	P	FALSE	NA	FALSE	NA	NA	NA
NA	Tsci4	12	81007809	-1	12	NA	misc_12	P	FALSE	NA	FALSE	NA	NA	NA
ENSMUSG00000047415	Gpr68	12	100876682	-1	12 F1	NA	dist_12	M	FALSE	NA	FALSE	NA	NA	NA
ENSMUSG00000040867	Begain	12	109032187	-1	12 F1	NA	dist_12	P	FALSE	NA	FALSE	NA	NA	NA
ENSMUSG00000112977	Gm34081	12	109493529	-1	12	NA	dist_12	M	FALSE	NA	FALSE	NA	NA	NA
ENSMUSG00000065526	Mir337	12	109585789	1	12 F1	NA	dist_12	M	FALSE	NA	FALSE	NA	NA	NA
ENSMUSG00000070080	Mir431	12	109590447	1	12 F1	anti-Rtl1	dist_12	M	FALSE	NA	FALSE	NA	NA	NA
ENSMUSG00000070072	Mir433	12	109591715	1	12 F1	anti-Rtl1	dist_12	M	FALSE	NA	FALSE	NA	NA	NA
ENSMUSG00000070076	Mir127	12	109592846	1	12 F1	anti-Rtl1	dist_12	M	FALSE	NA	FALSE	NA	NA	NA
ENSMUSG00000070133	Mir434	12	109594506	1	12 F1	anti-Rtl1	dist_12	M	FALSE	NA	FALSE	NA	NA	NA
ENSMUSG00000087855	Mir432	12	109594956	1	12 F1	anti-Rtl1	dist_12	M	FALSE	NA	FALSE	NA	NA	NA
ENSMUSG00000104858	Mir136	12	109595327	1	12 F1	anti-Rtl1	dist_12	M	FALSE	NA	FALSE	NA	NA	NA
ENSMUSG00000065433	Mir370	12	109618258	1	12 F1	Rian	dist_12	M	FALSE	NA	FALSE	NA	NA	NA
ENSMUSG00000088294	AF357425	12	109636012	1	12 F1	Rian	dist_12	M	FALSE	NA	FALSE	NA	NA	NA
NA	AF357426	12	109642838	1	12 F1	Rian	dist_12	M	FALSE	NA	FALSE	NA	NA	NA
NA	AF357359	12	109650709	1	12 F1	Rian	dist_12	M	FALSE	NA	FALSE	NA	NA	NA
ENSMUSG00000064621	Gm26922	12	109654627	1	12 F1	Rian	dist_12	M	FALSE	NA	FALSE	NA	NA	NA
ENSMUSG00000065749	AF357428	12	109679945	1	12 F1	Rian	dist_12	M	FALSE	NA	FALSE	NA	NA	NA
ENSMUSG00000065022	AF357341	12	109681519	1	12 F1	Rian	dist_12	M	FALSE	NA	FALSE	NA	NA	NA
ENSMUSG00000065477	Mir411	12	109710175	1	12 F1	Mirg	dist_12	M	FALSE	NA	FALSE	NA	NA	NA
ENSMUSG00000104582	Mir380	12	109711803	1	12 F1	Mirg	dist_12	M	FALSE	NA	FALSE	NA	NA	NA
ENSMUSG00000105853	Mir376b	12	109723458	1	12 F1	Mirg	dist_12	M	FALSE	NA	FALSE	NA	NA	NA
ENSMUSG00000065426	Mir134	12	109734139	1	12 F1	Mirg	dist_12	M	FALSE	NA	FALSE	NA	NA	NA
ENSMUSG00000065448	Mir154	12	109738433	1	12 F1	Mirg	dist_12	M	FALSE	NA	FALSE	NA	NA	NA
ENSMUSG00000065497	Mir410	12	109743715	1	12 F1	Mirg	dist_12	M	FALSE	NA	FALSE	NA	NA	NA
NA	DLK1 downstream transcripts	12	NA	NA	12 F1	NA	NA	P	FALSE	NA	FALSE	NA	NA	NA
NA	Mico1	12	NA	NA	12 F1	NA	NA	M	FALSE	NA	FALSE	NA	NA	NA
NA	Mico1os	12	NA	NA	12 F1	NA	NA	M	FALSE	NA	FALSE	NA	NA	NA
NA	anti-Rtl1	12	NA	NA	12 F1	anti-Rtl1	dist_12	M	FALSE	NA	FALSE	NA	NA	NA
ENSMUSG00000053101	Gpr141	13	19749682	-1	NA	NA	misc_13	M	FALSE	NA	FALSE	NA	NA	NA
ENSMUSG00000044231	Nhlrc1	13	47012557	-1	13 A5	NA	cent_13	P	FALSE	NA	FALSE	NA	NA	NA
ENSMUSG00000046082	Tmem174	13	98634978	-1	13 D1	NA	dist_13	P	FALSE	NA	FALSE	NA	NA	NA
ENSMUSG00000021848	Otx2	14	48657677	-1	14 C1	NA	prox_14	P	FALSE	NA	FALSE	NA	NA	NA
ENSMUSG00000098682	Otx2os1	14	48668708	1	14 C1	NA	prox_14	P	FALSE	NA	FALSE	NA	NA	NA
ENSMUSG00000040314	Ctsg	14	56099881	-1	NA	NA	prox_14	M	FALSE	NA	FALSE	NA	NA	NA
ENSMUSG00000015441	Gzmf	14	56205263	-1	NA	NA	prox_14	M	TRUE	TRUE	FALSE	0.0520833	NA	NA
ENSMUSG00000033470	Cysltr2	14	73025603	-1	NA	NA	cent_14	M	FALSE	NA	FALSE	NA	NA	NA
ENSMUSG00000034997	Htr2a	14	74640840	1	14 D2	NA	cent_14	M	FALSE	NA	FALSE	NA	NA	NA
ENSMUSG00000061517	Sox21	14	118233232	-1	14 E4	NA	misc_14	P	TRUE	FALSE	FALSE	0.0514263	NA	NA
ENSMUSG00000036760	Kcnk9	15	72501089	-1	15 D3	NA	cent_15	M	FALSE	NA	FALSE	NA	NA	NA
ENSMUSG00000047921	Trappc9	15	72589620	-1	15 D3	NA	cent_15	isoform-specific	TRUE	FALSE	FALSE	-0.0666482	NA	NA
ENSMUSG00000116295	Gm32885	15	97157029	-1	15	NA	misc_15	P	FALSE	NA	FALSE	NA	NA	NA
ENSMUSG00000022657	Cd96	16	46035657	-1	NA	NA	cent_16	M	FALSE	NA	FALSE	NA	NA	NA
ENSMUSG00000022651	Retnlg	16	48872621	1	NA	NA	cent_16	M	FALSE	NA	FALSE	NA	NA	NA
NA	XLOC_037414	17	4983739	-1	17	NA	prox_17	M	FALSE	NA	FALSE	NA	NA	NA
ENSMUSG00000073471	Rsph3a	17	7945614	1	17A1	NA	prox_17	M	TRUE	FALSE	FALSE	0.0589865	NA	NA
ENSMUSG00000023873	1700010I14Rik	17	8988333	1	17 A1	NA	prox_17	M	FALSE	NA	FALSE	NA	NA	NA
ENSMUSG00000037196	Pacrg	17	10403012	-1	17 A1	NA	prox_17	M	FALSE	NA	FALSE	NA	NA	NA
NA	XLOC_037615	17	12356364	-1	17	NA	prox_17	M	FALSE	NA	FALSE	NA	NA	NA
ENSMUSG00000040966	Slc22a2	17	12584132	1	17 A1	NA	prox_17	M	FALSE	NA	FALSE	NA	NA	NA
ENSMUSG00000089817	Gm7162	17	12819819	-1	NA	NA	prox_17	P	FALSE	NA	FALSE	NA	NA	NA
ENSMUSG00000067049	Unc93a	17	13108617	-1	NA	NA	prox_17	M	FALSE	NA	FALSE	NA	NA	NA
ENSMUSG00000048826	Dact2	17	14195052	-1	17 A2	NA	prox_17	M	FALSE	NA	FALSE	NA	NA	NA
ENSMUSG00000036594	H2-Aa	17	34282744	-1	NA	NA	misc_17	M	FALSE	NA	FALSE	NA	NA	NA
NA	CrossFirre	17	NA	NA	X A5	NA	NA	M	FALSE	NA	FALSE	NA	NA	NA
ENSMUSG00000043458	Pcdhb12	18	37435621	1	18 B3	NA	misc_18	M	FALSE	NA	FALSE	NA	NA	NA
ENSMUSG00000044906	4930503L19Rik	18	70452212	-1	NA	NA	misc_18	P	TRUE	FALSE	FALSE	0.0536239	NA	NA
ENSMUSG00000024673	Ms4a1	19	11249675	-1	NA	NA	misc_19	M	FALSE	NA	FALSE	NA	NA	NA
ENSMUSG00000052387	Trpm3	19	22139119	1	NA	NA	misc_19	M	FALSE	NA	FALSE	NA	NA	NA
ENSMUSG00000089679	Gm16299	19	53819354	-1	19 D2	NA	cent_19	P	FALSE	NA	FALSE	NA	NA	NA
ENSMUSG00000095180	Rhox5	X	37804842	1	X A3.3	NA	cent_X	M	FALSE	NA	FALSE	NA	NA	NA
ENSMUSG00000073125	Xlr3b	X	73192207	1	X A7	NA	dist_X	M	FALSE	NA	FALSE	NA	NA	NA
ENSMUSG00000067768	Xlr4b	X	73214333	1	X A7	NA	dist_X	M	FALSE	NA	FALSE	NA	NA	NA
ENSMUSG00000031362	Xlr4c	X	73233688	-1	X A7	NA	dist_X	M	FALSE	NA	FALSE	NA	NA	NA
ENSMUSG00000085715	Tsix	X	103431517	1	X D	NA	dist_X	P	FALSE	NA	FALSE	NA	NA	NA
ENSMUSG00000086503	Xist	X	103460366	-1	X D	NA	dist_X	P	FALSE	NA	FALSE	NA	NA	NA
ENSMUSG00000097571	Jpx	X	103493556	1	X D	NA	dist_X	P	FALSE	NA	FALSE	NA	NA	NA
ENSMUSG00000086370	Ftx	X	103560907	-1	X D	NA	dist_X	M	FALSE	NA	FALSE	NA	NA	NA
ENSMUSG00000031330	Zcchc13	X	103630586	1	X D	NA	dist_X	M	FALSE	NA	FALSE	NA	NA	NA

## Sheet: E9.5_maternal
Supplementary file 1c. Differential imprinted expression in male E9.5 B6Cast embryos, Smchd1 matΔ vs wt. A gene is called differentiallly imprinted if the multiple-testing corrected p-value is below 0.05 and the absolute difference in silent allele proportion greater than 0.05. Gnas is likely a false positive because in the second dataset of E9.5 embryos (maternal and zygotic deletions) it did no…
ensembl_gene_id	gene	chromosome_name	start_position	strand	location	locus	cluster	expressed_allele	expressed	imprinted	sufficient_counts	oo_minus_wt	padj	diff_imprinted	note
ENSMUSG00000070526	Peg12	7	62461871	-1	7 C-B5	NA	cent_7	P	TRUE	TRUE	TRUE	0.131619	8.46716e-12	TRUE
ENSMUSG00000033585	Ndn	7	62346569	1	7 C-B5	NA	cent_7	P	TRUE	TRUE	TRUE	0.0855869	1.26385e-06	TRUE
ENSMUSG00000027523	Gnas	2	174284320	1	2 H4	Gnas	dist_2	M	TRUE	TRUE	TRUE	-0.359024	0.00881251	TRUE	excluded (not imprinted in second data set)
ENSMUSG00000024423	Impact	18	12955852	1	18 A2-B2	NA	cent_18	P	TRUE	TRUE	TRUE	0.0294349	0.0640371	FALSE
ENSMUSG00000042814	Mcts2	2	152687035	1	2 H1	NA	dist_2	P	TRUE	TRUE	TRUE	0.047844	0.350089	FALSE
ENSMUSG00000039263	Npepl1	2	174110349	1	2 H4	NA	dist_2	M	TRUE	TRUE	TRUE	0.125714	0.350089	FALSE
ENSMUSG00000029096	Htra3	5	35652023	-1	5 B3	NA	prox_5	M	TRUE	TRUE	TRUE	0.176193	0.350089	FALSE
ENSMUSG00000070527	Mkrn3	7	62417593	-1	7 C-B5	NA	cent_7	P	TRUE	TRUE	TRUE	0.0917535	0.350089	FALSE
ENSMUSG00000037664	Cdkn1c	7	143458339	-1	7 F5	NA	dist_7	M	TRUE	TRUE	TRUE	0.00541335	0.350089	FALSE
ENSMUSG00000019817	Plagl1	10	13060504	1	10 A2	NA	cent_10	P	TRUE	TRUE	TRUE	0.00794277	0.350089	FALSE
ENSMUSG00000022639	Dubr	16	50719294	-1	NA	NA	cent_16	P	TRUE	TRUE	TRUE	-0.0957982	0.350089	FALSE
ENSMUSG00000023861	Mpc1	17	8282904	1	17A1	NA	prox_17	M	TRUE	TRUE	TRUE	-0.141047	0.350089	FALSE
ENSMUSG00000102252	Snrpn	7	59982495	-1	7 C-B5	SNURF-SNRPN	cent_7	P	TRUE	TRUE	TRUE	0.00494597	0.370574	FALSE
ENSMUSG00000022464	Slc38a4	15	96994820	-1	15 F1	NA	misc_15	P	TRUE	TRUE	TRUE	0.0719393	0.370574	FALSE
ENSMUSG00000023868	Pde10a	17	8525372	1	17A1	NA	prox_17	M	TRUE	TRUE	TRUE	0.0940776	0.370574	FALSE
ENSMUSG00000100826	Snhg14	7	59307924	-1	7 C-B5	NA	cent_7	P	TRUE	TRUE	TRUE	-0.0114943	0.399079	FALSE
ENSMUSG00000020176	Grb10	11	11930508	-1	11 A1	NA	prox_11	isoform-specific	TRUE	TRUE	TRUE	-0.00202563	0.399079	FALSE
ENSMUSG00000015189	Casd1	6	4600839	1	6 A1	NA	prox_6	M	TRUE	TRUE	TRUE	0.0380803	0.40849	FALSE
ENSMUSG00000004631	Sgce	6	4674350	-1	6 A1	NA	prox_6	P	TRUE	TRUE	TRUE	-0.0283487	0.512719	FALSE
ENSMUSG00000028581	Laptm5	4	130913125	1	NA	NA	misc_4	M	TRUE	TRUE	TRUE	0.0666516	0.51507	FALSE
ENSMUSG00000023830	Igf2r	17	12682406	-1	17 A1	NA	prox_17	M	TRUE	TRUE	TRUE	-0.0584276	0.51507	FALSE
ENSMUSG00000019188	H13	2	152669461	1	2 H1	NA	dist_2	isoform-specific	TRUE	TRUE	TRUE	-0.0855533	0.537339	FALSE
ENSMUSG00000097391	Mirg	12	109729764	1	12 F1	Mirg	dist_12	M	TRUE	TRUE	TRUE	-0.0571833	0.537339	FALSE
ENSMUSG00000106847	Peg13	15	72805600	-1	15 D3	NA	cent_15	P	TRUE	TRUE	TRUE	0.000715649	0.596468	FALSE
ENSMUSG00000021268	Meg3	12	109541001	1	12 F1	NA	dist_12	M	TRUE	TRUE	TRUE	-0.012065	0.614851	FALSE
ENSMUSG00000002266	Zim1	7	6671269	-1	7 A2-B1	NA	prox_7	M	TRUE	TRUE	TRUE	-0.00742114	0.640913	FALSE
ENSMUSG00000042105	Inpp5f	7	128611328	1	7 F3	NA	distcent_7	P	TRUE	TRUE	TRUE	-0.0327859	0.640913	FALSE
ENSMUSG00000010751	Tnfrsf22	7	143634806	-1	7 F5	NA	dist_7	M	TRUE	TRUE	TRUE	0.0220962	0.640913	FALSE
ENSMUSG00000023885	Thbs2	17	14665500	-1	17 A2	NA	prox_17	M	TRUE	TRUE	TRUE	0.101536	0.640913	FALSE
ENSMUSG00000073209	Klf14	6	30956023	-1	6 A3	NA	prox_6	M	TRUE	TRUE	TRUE	0.0208333	0.753065	FALSE
ENSMUSG00000086266	Igf2os	7	142659693	1	7 F5	NA	dist_7	P	TRUE	TRUE	TRUE	-0.00563023	0.758582	FALSE
ENSMUSG00000082536	Gm13456	2	40555752	1	NA	NA	prox_2	M	TRUE	TRUE	TRUE	-0.01456	0.762987	FALSE
ENSMUSG00000061186	Sfmbt2	2	10370510	1	2 A1	NA	prox_2	P	TRUE	TRUE	TRUE	-0.0507862	0.781216	FALSE
ENSMUSG00000044068	Zrsr1	11	22972005	1	11 A3	NA	prox_11	P	TRUE	TRUE	TRUE	0.0208333	0.827051	FALSE
ENSMUSG00000051855	Mest	6	30723547	1	6 A3	NA	prox_6	isoform-specific	TRUE	TRUE	TRUE	-0.00057284	0.842891	FALSE
ENSMUSG00000067787	Blcap	2	157556362	-1	2 H1	NA	dist_2	isoform-specific	TRUE	TRUE	TRUE	-0.00915861	0.855259	FALSE
ENSMUSG00000092035	Peg10	6	4747306	1	6 A1	NA	prox_6	P	TRUE	TRUE	TRUE	0.00524316	0.855259	FALSE
ENSMUSG00000030638	Sh3gl3	7	82173840	1	7 D3	NA	misc_7	P	TRUE	TRUE	TRUE	0.0792371	0.855259	FALSE
ENSMUSG00000037221	Mospd3	5	137596645	-1	5 G2	NA	misc_5	P	TRUE	TRUE	TRUE	-0.0145637	0.886342	FALSE
ENSMUSG00000081833	Gm13669	2	75808358	1	NA	NA	prox_2	M	TRUE	TRUE	TRUE	-0.0590278	0.962409	FALSE
ENSMUSG00000027520	Zdbf2	1	63273265	1	1 C2	GPR1	cent_1	P	TRUE	TRUE	TRUE	0.00764951	0.97352	FALSE
ENSMUSG00000051527	Usp29	7	6730578	1	7 A2-B1	NA	prox_7	P	TRUE	TRUE	TRUE	0.000866101	0.97352	FALSE
ENSMUSG00000042607	Asb4	6	5383386	1	6 A1	NA	prox_6	M	TRUE	TRUE	TRUE	-0.0010161	0.987575	FALSE
ENSMUSG00000009876	Cox4i2	2	152754173	1	2 H1	NA	dist_2	P	TRUE	TRUE	TRUE	0.0186431	0.999926	FALSE
ENSMUSG00000007659	Bcl2l1	2	152780668	-1	2 H1	NA	dist_2	P	TRUE	TRUE	TRUE	0.00363361	0.999926	FALSE
ENSMUSG00000028078	Dclk2	3	86786151	-1	NA	NA	misc_3	M	TRUE	TRUE	TRUE	-0.0327587	0.999926	FALSE
ENSMUSG00000029775	Klhdc10	6	30401868	1	6 A3	NA	prox_6	M	TRUE	TRUE	TRUE	-0.00838503	0.999926	FALSE
ENSMUSG00000025607	Copg2	6	30747554	-1	6 A3	NA	prox_6	M	TRUE	TRUE	TRUE	-0.0156855	0.999926	FALSE
ENSMUSG00000002265	Peg3	7	6703892	-1	7 A2-B1	NA	prox_7	P	TRUE	TRUE	TRUE	0.00087425	0.999926	FALSE
ENSMUSG00000000948	Gm38393	7	59974149	-1	7 C-B5	NA	cent_7	P	TRUE	TRUE	TRUE	0	0.999926	FALSE
ENSMUSG00000000031	H19	7	142575529	-1	7 F5	NA	dist_7	M	TRUE	TRUE	TRUE	-0.00370667	0.999926	FALSE
ENSMUSG00000048583	Igf2	7	142650766	-1	7 F5	NA	dist_7	P	TRUE	TRUE	TRUE	0.000318337	0.999926	FALSE
ENSMUSG00000009545	Kcnq1	7	143106362	1	7 F5	NA	dist_7	M	TRUE	TRUE	TRUE	0.0633013	0.999926	FALSE
ENSMUSG00000037606	Osbpl5	7	143688762	-1	7 F5	NA	dist_7	M	TRUE	TRUE	TRUE	-0.00935603	0.999926	FALSE
ENSMUSG00000031962	Cdh15	8	122847966	1	8 E1	NA	misc_8	isoform-specific	TRUE	TRUE	TRUE	0.0267717	0.999926	FALSE
ENSMUSG00000032359	Ctsh	9	90054152	1	9 E3.1	NA	dist_9	P	TRUE	TRUE	TRUE	0.00628509	0.999926	FALSE
ENSMUSG00000062866	Phactr2	10	13207717	-1	10 A1	NA	cent_10	M	TRUE	TRUE	TRUE	-0.017144	0.999926	FALSE
ENSMUSG00000020182	Ddc	11	11814101	-1	11 A1	NA	prox_11	P	TRUE	TRUE	TRUE	-0.00728443	0.999926	FALSE
ENSMUSG00000035112	Wnk4	11	101260567	1	11 D	NA	misc_11	M	TRUE	TRUE	TRUE	0.0561022	0.999926	FALSE
ENSMUSG00000039963	Ccdc40	11	119228572	1	11 E2	NA	misc_11	P	TRUE	TRUE	TRUE	0.0267557	0.999926	FALSE
ENSMUSG00000112546	Gm6992	12	31018218	1	NA	NA	misc_12	P	TRUE	TRUE	TRUE	-0.00100756	0.999926	FALSE
ENSMUSG00000040856	Dlk1	12	109452823	1	12 F1	NA	dist_12	P	TRUE	TRUE	TRUE	0.00561514	0.999926	FALSE
ENSMUSG00000097451	Rian	12	109603940	1	12 F1	NA	dist_12	M	TRUE	TRUE	TRUE	-0.000522223	0.999926	FALSE
ENSMUSG00000018259	Prl8a2	13	27345673	1	NA	NA	cent_13	M	TRUE	TRUE	TRUE	-0.0037037	0.999926	FALSE
ENSMUSG00000047842	Diras2	13	52504380	-1	NA	NA	cent_13	M	TRUE	TRUE	TRUE	-0.0249204	0.999926	FALSE
ENSMUSG00000078247	Airn	17	12741311	1	17 A1	NA	prox_17	P	TRUE	TRUE	TRUE	0	0.999926	FALSE
ENSMUSG00000025967	Eef1b2	1	63176825	1	1 C2	GPR1	cent_1	P	TRUE	FALSE	FALSE	0.000174236	NA	FALSE
ENSMUSG00000026470	Stx6	1	155158715	1	1 G3	NA	misc_1	M	TRUE	FALSE	FALSE	0.0188649	NA	FALSE
ENSMUSG00000033722	BC034090	1	155212471	-1	1 G3	NA	misc_1	M	TRUE	FALSE	FALSE	-2.22358e-05	NA	FALSE
ENSMUSG00000026970	Rbms1	2	60750193	-1	2 C1.2	NA	prox_2	P	TRUE	FALSE	FALSE	0.00667043	NA	FALSE
ENSMUSG00000016458	Wt1	2	105126529	1	2 E2-E3	NA	prox_2	M	TRUE	FALSE	FALSE	0.0364671	NA	FALSE
ENSMUSG00000040093	Bmf	2	118528757	-1	NA	NA	prox_2	M	TRUE	FALSE	FALSE	0.0116249	NA	FALSE
ENSMUSG00000042745	Id1	2	152736251	1	2 H1	NA	dist_2	P	TRUE	FALSE	FALSE	0.0375182	NA	FALSE
ENSMUSG00000027469	Tpx2	2	152847964	1	2 H1	NA	dist_2	P	TRUE	FALSE	FALSE	-0.0209015	NA	FALSE
ENSMUSG00000008999	Bmp7	2	172868012	-1	2 H3	NA	dist_2	P	TRUE	FALSE	FALSE	0.0129539	NA	FALSE
ENSMUSG00000027522	Stx16	2	174076308	1	2 H4	NA	dist_2	M	TRUE	FALSE	FALSE	-0.0479974	NA	FALSE
ENSMUSG00000027524	Edn3	2	174760619	1	2 H4	Gnas	dist_2	P	TRUE	FALSE	FALSE	-0.0474162	NA	FALSE
ENSMUSG00000025764	Jade1	3	41555731	1	3 B	NA	cent_3	P	TRUE	FALSE	FALSE	0.0211549	NA	FALSE
ENSMUSG00000027955	Gask1b	3	79884533	1	3 E3	NA	misc_3	P	TRUE	FALSE	FALSE	0.000248309	NA	FALSE
ENSMUSG00000028339	Col15a1	4	47208161	1	NA	NA	misc_4	M	TRUE	FALSE	FALSE	-0.0206898	NA	FALSE
ENSMUSG00000083219	Gm11410	4	80003989	1	NA	NA	misc_4	M	TRUE	TRUE	FALSE	0	NA	FALSE
ENSMUSG00000032827	Ppp1r9a	6	4902917	1	6 A1	NA	prox_6	M	TRUE	FALSE	FALSE	0.0205216	NA	FALSE
ENSMUSG00000029804	Herc3	6	58831465	1	6 B3	NA	prox_6	isoform-specific	TRUE	FALSE	FALSE	-0.0494752	NA	FALSE
ENSMUSG00000055430	Nap1l5	6	58905233	-1	6 C1	NA	prox_6	P	TRUE	TRUE	FALSE	0	NA	FALSE
ENSMUSG00000025889	Snca	6	60731575	-1	NA	NA	prox_6	M	TRUE	FALSE	FALSE	-0.024139	NA	FALSE
ENSMUSG00000030199	Etv6	6	134035700	1	6 G1	NA	dist_6	P	TRUE	FALSE	FALSE	-0.0321593	NA	FALSE
ENSMUSG00000002602	Axl	7	25757273	-1	7 A3-B1	NA	misc_7	M	TRUE	FALSE	FALSE	-0.0259532	NA	FALSE
ENSMUSG00000030579	Tyrobp	7	30413760	1	NA	NA	misc_7	M	TRUE	TRUE	FALSE	-0.0132584	NA	FALSE
ENSMUSG00000025326	Ube3a	7	59228750	1	7 C-B5	NA	cent_7	M	TRUE	FALSE	FALSE	-0.0093215	NA	FALSE
ENSMUSG00000045813	Gm9801	7	62094506	-1	7 C-B5	NA	cent_7	P	TRUE	TRUE	FALSE	0.030303	NA	FALSE
ENSMUSG00000030782	Tgfb1i1	7	128246812	1	7 F3	NA	distcent_7	M	TRUE	FALSE	FALSE	0.0159646	NA	FALSE
ENSMUSG00000030847	Bag3	7	128523616	1	7 F3	NA	distcent_7	M	TRUE	FALSE	FALSE	-0.0360624	NA	FALSE
ENSMUSG00000059277	R74862	7	143021784	-1	7 F5	NA	dist_7	M	TRUE	FALSE	FALSE	-0.0470115	NA	FALSE
ENSMUSG00000037706	Cd81	7	143052739	1	7 F5	NA	dist_7	M	TRUE	FALSE	FALSE	0.0257407	NA	FALSE
ENSMUSG00000045752	Tssc4	7	143069249	1	7 F5	NA	dist_7	M	TRUE	FALSE	FALSE	-0.0222336	NA	FALSE
ENSMUSG00000101609	Kcnq1ot1	7	143203458	-1	7 F5	NA	dist_7	P	TRUE	TRUE	FALSE	0.00543478	NA	FALSE
ENSMUSG00000059119	Nap1l4	7	143513579	-1	7 F5	NA	dist_7	M	TRUE	FALSE	FALSE	-0.00476487	NA	FALSE
ENSMUSG00000031075	Ano1	7	144588549	-1	7 F5	NA	dist_7	M	TRUE	FALSE	FALSE	0.0209042	NA	FALSE
ENSMUSG00000031714	Gab1	8	80764438	-1	8 C2	NA	misc_8	P	TRUE	FALSE	FALSE	-0.00416829	NA	FALSE
ENSMUSG00000040111	Gramd1b	9	40293233	-1	9 A5.1	NA	misc_9	P	TRUE	FALSE	FALSE	-0.042384	NA	FALSE
ENSMUSG00000032299	Commd4	9	57155035	-1	NA	NA	misc_9	P	TRUE	FALSE	FALSE	-0.0154484	NA	FALSE
ENSMUSG00000032280	Tle3	9	61372366	1	9 B	NA	misc_9	P	TRUE	FALSE	FALSE	0.0180294	NA	FALSE
ENSMUSG00000032422	Snx14	9	88376750	-1	9 E3.1	NA	dist_9	P	TRUE	FALSE	FALSE	-0.0403258	NA	FALSE
ENSMUSG00000019795	Pcmt1	10	7629373	-1	10 A1	NA	misc_10	P	TRUE	FALSE	FALSE	0.0250579	NA	FALSE
ENSMUSG00000019814	Ltv1	10	13178140	-1	NA	NA	cent_10	M	TRUE	FALSE	FALSE	-0.0412949	NA	FALSE
ENSMUSG00000020173	Cobl	11	12236608	-1	11 A1	NA	prox_11	M	TRUE	FALSE	FALSE	-0.00395157	NA	FALSE
ENSMUSG00000051355	Commd1	11	22896136	-1	11 A3	NA	prox_11	isoform-specific	TRUE	FALSE	FALSE	-0.0366286	NA	FALSE
ENSMUSG00000043439	Epop	11	97627389	-1	NA	NA	misc_11	P	TRUE	FALSE	FALSE	-0.0148605	NA	FALSE
ENSMUSG00000020634	Ubxn2a	12	4879032	-1	NA	NA	prox_12	P	TRUE	FALSE	FALSE	0.0147364	NA	FALSE
ENSMUSG00000015143	Actn1	12	80167547	-1	12 C3	NA	misc_12	P	TRUE	FALSE	FALSE	-0.00349265	NA	FALSE
ENSMUSG00000021136	Smoc1	12	81026808	1	12 D1	NA	misc_12	P	TRUE	FALSE	FALSE	-0.0293636	NA	FALSE
ENSMUSG00000047415	Gpr68	12	100876682	-1	12 F1	NA	dist_12	M	TRUE	FALSE	FALSE	-0.0415133	NA	FALSE
ENSMUSG00000021266	Wars	12	108860030	-1	12 F1	NA	dist_12	P	TRUE	FALSE	FALSE	0.0123052	NA	FALSE
ENSMUSG00000040867	Begain	12	109032187	-1	12 F1	NA	dist_12	P	TRUE	FALSE	FALSE	0.00940066	NA	FALSE
ENSMUSG00000017843	Ppp2r5c	12	110447120	1	12 F1	NA	dist_12	P	TRUE	FALSE	FALSE	-0.0118927	NA	FALSE
ENSMUSG00000018707	Dync1h1	12	110601452	1	12 F1	NA	dist_12	P	TRUE	FALSE	FALSE	0.0100653	NA	FALSE
ENSMUSG00000016477	E2f3	13	29906575	-1	13 A3.2	NA	cent_13	P	TRUE	FALSE	FALSE	0.00130993	NA	FALSE
ENSMUSG00000044231	Nhlrc1	13	47012557	-1	13 A5	NA	cent_13	P	TRUE	FALSE	FALSE	-0.00606127	NA	FALSE
ENSMUSG00000041773	Enc1	13	97241105	1	13 D1	NA	dist_13	P	TRUE	FALSE	FALSE	0.00437587	NA	FALSE
ENSMUSG00000021699	Pde4d	13	108449948	1	13 D2	NA	dist_13	P	TRUE	FALSE	FALSE	0.0217688	NA	FALSE
ENSMUSG00000021848	Otx2	14	48657677	-1	14 C1	NA	prox_14	P	TRUE	FALSE	FALSE	-0.0422315	NA	FALSE
ENSMUSG00000061517	Sox21	14	118233232	-1	14 E4	NA	misc_14	P	TRUE	FALSE	FALSE	-0.0392458	NA	FALSE
ENSMUSG00000022139	Mbnl2	14	120275669	1	14 E4	NA	misc_14	P	TRUE	FALSE	FALSE	-0.00126977	NA	FALSE
ENSMUSG00000047921	Trappc9	15	72589620	-1	15 D3	NA	cent_15	isoform-specific	TRUE	FALSE	FALSE	-0.00577653	NA	FALSE
ENSMUSG00000036698	Ago2	15	73095844	-1	15 D3	NA	cent_15	M	TRUE	FALSE	FALSE	-0.0157752	NA	FALSE
ENSMUSG00000000489	Pdgfb	15	79995874	-1	15 E1	NA	cent_15	P	TRUE	FALSE	FALSE	-0.0251172	NA	FALSE
ENSMUSG00000023169	Slc38a1	15	96571418	-1	15 F1	NA	misc_15	P	TRUE	FALSE	FALSE	-0.00320671	NA	FALSE
ENSMUSG00000022462	Slc38a2	15	96687392	-1	15 F1	NA	misc_15	P	TRUE	FALSE	FALSE	0.0105131	NA	FALSE
ENSMUSG00000022641	Bbx	16	50191844	-1	16 B5	NA	cent_16	P	TRUE	FALSE	FALSE	0.0175391	NA	FALSE
ENSMUSG00000022952	Runx1	16	92601466	-1	16 C4	NA	misc_16	P	TRUE	FALSE	FALSE	0.0265553	NA	FALSE
ENSMUSG00000069729	Arid1b	17	4994332	1	17 A1	NA	prox_17	M	TRUE	FALSE	FALSE	-0.0382215	NA	FALSE
ENSMUSG00000034265	Zdhhc14	17	5492557	1	17A1	NA	prox_17	M	TRUE	TRUE	FALSE	-0.010482	NA	FALSE
ENSMUSG00000062078	Qk	17	10202601	-1	17 A1	NA	prox_17	M	TRUE	FALSE	FALSE	0.00340469	NA	FALSE
ENSMUSG00000037196	Pacrg	17	10403012	-1	17 A1	NA	prox_17	M	TRUE	FALSE	FALSE	0.0291667	NA	FALSE
ENSMUSG00000048826	Dact2	17	14195052	-1	17 A2	NA	prox_17	M	TRUE	FALSE	FALSE	0.0254053	NA	FALSE
ENSMUSG00000023886	Smoc2	17	14279506	1	17 A2	NA	prox_17	M	TRUE	FALSE	FALSE	0.00940742	NA	FALSE
ENSMUSG00000024140	Epas1	17	86753700	1	17 E4	NA	cent_17	P	TRUE	FALSE	FALSE	0.00152695	NA	FALSE
ENSMUSG00000044906	4930503L19Rik	18	70452212	-1	NA	NA	misc_18	P	TRUE	FALSE	FALSE	0.0208745	NA	FALSE
ENSMUSG00000048720	Tbc1d12	19	38836579	1	19 C3	NA	cent_19	P	TRUE	FALSE	FALSE	-0.0232881	NA	FALSE
ENSMUSG00000046856	Gpr1	1	63182691	-1	1 C2	GPR1	cent_1	P	FALSE	NA	FALSE	NA	NA	NA
ENSMUSG00000025964	Adam23	1	63445891	1	1 C2	GPR1	cent_1	P	TRUE	FALSE	FALSE	-0.116743	NA	NA
ENSMUSG00000026395	Ptprc	1	138062861	-1	NA	NA	misc_1	M	TRUE	TRUE	FALSE	0.12777	NA	NA
ENSMUSG00000026358	Rgs1	1	144242296	-1	NA	NA	misc_1	M	FALSE	NA	FALSE	NA	NA	NA
ENSMUSG00000026471	Mr1	1	155127277	-1	1 G3	NA	misc_1	M	TRUE	TRUE	FALSE	0.0850694	NA	NA
ENSMUSG00000026581	Sell	1	164061982	1	NA	NA	misc_1	M	FALSE	NA	FALSE	NA	NA	NA
ENSMUSG00000073494	Sh2d1b2	1	170232749	1	NA	NA	misc_1	M	FALSE	NA	FALSE	NA	NA	NA
ENSMUSG00000038421	Fcrla	1	170917576	-1	NA	NA	misc_1	M	FALSE	NA	FALSE	NA	NA	NA
NA	Zdbf2linc	1	NA	NA	1 C2	GPR1	cent_1	P	FALSE	NA	FALSE	NA	NA	NA
NA	XLOC_047844	2	10308628	-1	2	NA	prox_2	P	FALSE	NA	FALSE	NA	NA	NA
ENSMUSG00000086748	Gm13261	2	10339283	-1	NA	NA	prox_2	P	FALSE	NA	FALSE	NA	NA	NA
ENSMUSG00000026770	Il2ra	2	11642807	1	NA	NA	prox_2	M	FALSE	NA	FALSE	NA	NA	NA
ENSMUSG00000087701	Gm13493	2	51871126	-1	NA	NA	prox_2	M	FALSE	NA	FALSE	NA	NA	NA
ENSMUSG00000068129	Cst7	2	150570415	1	NA	NA	dist_2	M	FALSE	NA	FALSE	NA	NA	NA
ENSMUSG00000067786	Nnat	2	157560078	1	2 H1	NA	dist_2	P	FALSE	NA	FALSE	NA	NA	NA
ENSMUSG00000074622	Mafb	2	160363703	-1	2 H2	NA	dist_2	M	TRUE	FALSE	FALSE	0.0536074	NA	NA
ENSMUSG00000027551	Zfp64	2	168893331	-1	2 H3	NA	dist_2	P	TRUE	FALSE	FALSE	-0.11182	NA	NA
ENSMUSG00000065521	Mir296	2	174267047	-1	2 H4	Gnas	dist_2	P	FALSE	NA	FALSE	NA	NA	NA
ENSMUSG00000065410	Mir298	2	174267504	-1	2 H4	Gnas	dist_2	P	FALSE	NA	FALSE	NA	NA	NA
ENSMUSG00000086537	Nespas	2	174281237	-1	2 H4	Gnas	dist_2	P	FALSE	NA	FALSE	NA	NA	NA
NA	NESP55	2	NA	NA	2 H4	Gnas	dist_2	M	FALSE	NA	FALSE	NA	NA	NA
NA	GNASXL	2	NA	NA	2 H4	Gnas	dist_2	P	FALSE	NA	FALSE	NA	NA	NA
NA	Exon-1A	2	NA	NA	2 H4	Gnas	dist_2	P	FALSE	NA	FALSE	NA	NA	NA
NA	GS-alpha	2	NA	NA	2 H4	Gnas	dist_2	M	FALSE	NA	FALSE	NA	NA	NA
NA	F7	2	NA	NA	2 H4	Gnas	dist_2	M	FALSE	NA	FALSE	NA	NA	NA
ENSMUSG00000001865	Cpa3	3	20215620	-1	NA	NA	misc_3	M	FALSE	NA	FALSE	NA	NA	NA
ENSMUSG00000105260	Gm40040	3	41477577	-1	NA	NA	cent_3	P	FALSE	NA	FALSE	NA	NA	NA
ENSMUSG00000097639	Platr4	3	41484024	-1	3 B	NA	cent_3	P	FALSE	NA	FALSE	NA	NA	NA
ENSMUSG00000106223	2400006e01Rik	3	41521247	-1	3 B	NA	cent_3	P	FALSE	NA	FALSE	NA	NA	NA
ENSMUSG00000056071	S100a9	3	90692632	-1	NA	NA	misc_3	M	FALSE	NA	FALSE	NA	NA	NA
ENSMUSG00000087119	Atg4a-ps	3	103643954	-1	NA	NA	misc_3	M	FALSE	NA	FALSE	NA	NA	NA
ENSMUSG00000028859	Csf3r	4	126024550	1	NA	NA	misc_4	M	TRUE	TRUE	FALSE	0.210069	NA	NA
ENSMUSG00000029304	Spp1	5	104435118	1	NA	NA	misc_5	M	TRUE	FALSE	FALSE	0.0810733	NA	NA
ENSMUSG00000040013	Fkbp6	5	135291704	-1	5 G2	NA	misc_5	P	TRUE	TRUE	FALSE	0.05	NA	NA
ENSMUSG00000097287	D130017N08Rik	5	143758354	1	5 G2	NA	misc_5	P	TRUE	FALSE	FALSE	-0.191238	NA	NA
ENSMUSG00000042817	Flt3	5	147330741	-1	NA	NA	misc_5	P	FALSE	NA	FALSE	NA	NA	NA
ENSMUSG00000023964	Calcr	6	3685680	-1	6 A1	NA	prox_6	M	TRUE	TRUE	FALSE	-0.372917	NA	NA
ENSMUSG00000029664	Tfpi2	6	3962595	-1	6 A1	NA	prox_6	M	TRUE	FALSE	FALSE	0.0695252	NA	NA
ENSMUSG00000065501	Mir335	6	30741299	1	6 A3	NA	prox_6	P	FALSE	NA	FALSE	NA	NA	NA
ENSMUSG00000039032	Tsga13	6	30896981	-1	6 A3.3	NA	prox_6	M	FALSE	NA	FALSE	NA	NA	NA
ENSMUSG00000076490	Trbc1	6	41538218	1	NA	NA	prox_6	M	FALSE	NA	FALSE	NA	NA	NA
ENSMUSG00000030114	Klrg1	6	122270596	-1	NA	NA	dist_6	M	FALSE	NA	FALSE	NA	NA	NA
ENSMUSG00000108090	Gm6637	6	122295664	1	NA	NA	dist_6	M	FALSE	NA	FALSE	NA	NA	NA
NA	Copg2os1	6	NA	NA	6 A3	NA	prox_6	P	FALSE	NA	FALSE	NA	NA	NA
ENSMUSG00000108113	Zim2	7	6651748	-1	7 A2-B1	NA	prox_7	M	FALSE	NA	FALSE	NA	NA	NA
ENSMUSG00000108043	Zim3	7	6955685	-1	7 A2-B1	NA	prox_7	M	FALSE	NA	FALSE	NA	NA	NA
ENSMUSG00000109176	Zfp264	7	6977246	1	7 A2-B1	NA	prox_7	P	FALSE	NA	FALSE	NA	NA	NA
ENSMUSG00000077191	Snord64	7	59978808	-1	7C-B5	SNURF-SNRPN	cent_7	P	FALSE	NA	FALSE	NA	NA	NA
ENSMUSG00000089375	Snord107	7	59980876	-1	7C-B5	SNURF-SNRPN	cent_7	P	FALSE	NA	FALSE	NA	NA	NA
ENSMUSG00000102627	Snurf	7	59995449	-1	7 C-B5	SNURF-SNRPN	cent_7	P	FALSE	NA	FALSE	NA	NA	NA
NA	XLOC_075991	7	60641818	-1	7	NA	cent_7	P	FALSE	NA	FALSE	NA	NA	NA
ENSMUSG00000109006	B230209E15Rik	7	61529871	-1	7 C-B5	NA	cent_7	P	FALSE	NA	FALSE	NA	NA	NA
ENSMUSG00000109394	A230057D06Rik	7	61704519	-1	7 C-B5	NA	cent_7	P	FALSE	NA	FALSE	NA	NA	NA
ENSMUSG00000109321	A330076H08Rik	7	61930137	-1	7 C-B5	NA	cent_7	P	FALSE	NA	FALSE	NA	NA	NA
ENSMUSG00000056972	Magel2	7	62377010	1	7 C-B5	NA	cent_7	P	TRUE	TRUE	FALSE	0.0961425	NA	NA
ENSMUSG00000030724	Cd19	7	126408450	-1	NA	NA	distcent_7	M	FALSE	NA	FALSE	NA	NA	NA
ENSMUSG00000045777	Ifitm10	7	142325837	-1	7 F5	NA	dist_7	M	TRUE	FALSE	FALSE	0.243947	NA	NA
ENSMUSG00000018819	Lsp1	7	142460809	1	7 F5	NA	dist_7	M	TRUE	FALSE	FALSE	0.0511456	NA	NA
ENSMUSG00000087090	Nctc1	7	142544609	-1	7 F5	NA	dist_7	P	FALSE	NA	FALSE	NA	NA	NA
ENSMUSG00000000215	Ins2	7	142678656	-1	7 F5	NA	dist_7	P	FALSE	NA	FALSE	NA	NA	NA
ENSMUSG00000000214	Th	7	142892752	-1	7 F5	NA	dist_7	M	TRUE	FALSE	FALSE	-0.124657	NA	NA
ENSMUSG00000009248	Ascl2	7	142966829	-1	7 F5	NA	dist_7	M	FALSE	NA	FALSE	NA	NA	NA
NA	AF313042	7	143462528	NA	7 F5	NA	dist_7	M	FALSE	NA	FALSE	NA	NA	NA
ENSMUSG00000000154	Slc22a18	7	143473736	1	7 F5	NA	dist_7	M	FALSE	NA	FALSE	NA	NA	NA
ENSMUSG00000010760	Phlda2	7	143501545	-1	7 F5	NA	dist_7	M	TRUE	TRUE	FALSE	0.128649	NA	NA
ENSMUSG00000045362	Tnfrsf26	7	143607659	-1	7 F5	NA	dist_7	M	TRUE	FALSE	FALSE	0.0618056	NA	NA
ENSMUSG00000109251	E230032D23Rik	7	143628024	1	7	NA	dist_7	M	FALSE	NA	FALSE	NA	NA	NA
ENSMUSG00000037613	Tnfrsf23	7	143665809	-1	7 F5	NA	dist_7	M	TRUE	TRUE	FALSE	0.42619	NA	NA
NA	Peg3os	7	NA	NA	7 A1	NA	prox_7	P	FALSE	NA	FALSE	NA	NA	NA
NA	Mkrn3os	7	NA	NA	7C-B5	NA	cent_7	P	FALSE	NA	FALSE	NA	NA	NA
NA	BM117114	7	NA	NA	7C-B5	NA	cent_7	P	FALSE	NA	FALSE	NA	NA	NA
NA	Pec2	7	NA	NA	7C-B5	NA	cent_7	P	FALSE	NA	FALSE	NA	NA	NA
NA	BB077283	7	NA	NA	7C-B5	NA	cent_7	P	FALSE	NA	FALSE	NA	NA	NA
NA	Pec3	7	NA	NA	7C-B5	NA	cent_7	P	FALSE	NA	FALSE	NA	NA	NA
NA	Snord116_cluster	7	NA	NA	7C-B5	pwcr1	cent_7	P	FALSE	NA	FALSE	NA	NA	NA
NA	Snord115_cluster	7	NA	NA	7C-B5	pwcr1	cent_7	P	FALSE	NA	FALSE	NA	NA	NA
NA	U80893	7	NA	NA	7C-B5	NA	cent_7	P	FALSE	NA	FALSE	NA	NA	NA
NA	PIHit	7	NA	NA	7 F5	NA	dist_7	P	FALSE	NA	FALSE	NA	NA	NA
NA	Tsci1	8	80859408	1	8	NA	misc_8	P	FALSE	NA	FALSE	NA	NA	NA
ENSMUSG00000031665	Sall1	8	89027235	-1	NA	NA	misc_8	P	TRUE	FALSE	FALSE	-0.0509335	NA	NA
ENSMUSG00000032094	Cd3d	9	44981786	1	NA	NA	misc_9	M	FALSE	NA	FALSE	NA	NA	NA
ENSMUSG00000040204	Pclaf	9	65890237	1	NA	NA	misc_9	P	TRUE	FALSE	FALSE	0.0534612	NA	NA
ENSMUSG00000065596	Mir184	9	89802260	-1	9 E3.1	NA	dist_9	P	FALSE	NA	FALSE	NA	NA	NA
ENSMUSG00000098627	4930524O08Rik	9	89826519	1	9 E3.1	NA	dist_9	P	FALSE	NA	FALSE	NA	NA	NA
ENSMUSG00000032356	Rasgrf1	9	89909908	1	9 E3.1	NA	dist_9	P	FALSE	NA	FALSE	NA	NA	NA
ENSMUSG00000032454	Rbp2	9	98486115	1	9 E3.3	NA	dist_9	P	FALSE	NA	FALSE	NA	NA	NA
NA	AS4	9	NA	1	9 E3.1	NA	dist_9	P	FALSE	NA	FALSE	NA	NA	NA
ENSMUSG00000037202	Prf1	10	61297833	1	NA	NA	mid_10	M	FALSE	NA	FALSE	NA	NA	NA
ENSMUSG00000000290	Itgb2	10	77530252	1	NA	NA	mid_10	M	TRUE	FALSE	FALSE	0.062004	NA	NA
ENSMUSG00000025383	Il23a	10	128296139	-1	NA	NA	dist_10	M	FALSE	NA	FALSE	NA	NA	NA
ENSMUSG00000025348	Itga7	10	128933818	1	NA	NA	dist_10	M	TRUE	TRUE	FALSE	-0.288055	NA	NA
NA	XLOC_011039	11	12037523	1	11	NA	misc_11	M	FALSE	NA	FALSE	NA	NA	NA
NA	Tsci2	11	12151320	1	11	NA	misc_11	M	FALSE	NA	FALSE	NA	NA	NA
ENSMUSG00000051650	B3gnt2	11	22759738	-1	11 A3.2	NA	prox_11	M	TRUE	TRUE	FALSE	0.263095	NA	NA
ENSMUSG00000020399	Havcr2	11	46454935	1	NA	NA	misc_11	M	FALSE	NA	FALSE	NA	NA	NA
ENSMUSG00000036545	Adamts2	11	50602084	1	11 B1.3	NA	misc_11	P	TRUE	FALSE	FALSE	-0.0923561	NA	NA
ENSMUSG00000086646	Platr20	11	51189833	-1	11 B1.3	NA	misc_11	P	FALSE	NA	FALSE	NA	NA	NA
ENSMUSG00000061469	Gm12569	11	51220473	1	11 B1.3	NA	misc_11	P	FALSE	NA	FALSE	NA	NA	NA
ENSMUSG00000045942	BC049762	11	51253651	-1	11 B1.3	NA	misc_11	P	FALSE	NA	FALSE	NA	NA	NA
ENSMUSG00000085860	2410003L11Rik	11	97598511	1	11 D	NA	misc_11	P	FALSE	NA	FALSE	NA	NA	NA
ENSMUSG00000066632	Pgk1-rs7	12	10898986	-1	NA	NA	misc_12	M	FALSE	NA	FALSE	NA	NA	NA
NA	Tsci4	12	81007809	-1	12	NA	misc_12	P	FALSE	NA	FALSE	NA	NA	NA
ENSMUSG00000112977	Gm34081	12	109493529	-1	12	NA	dist_12	M	FALSE	NA	FALSE	NA	NA	NA
ENSMUSG00000065526	Mir337	12	109585789	1	12 F1	NA	dist_12	M	FALSE	NA	FALSE	NA	NA	NA
ENSMUSG00000085925	Rtl1	12	109589193	-1	12 F1	NA	dist_12	P	TRUE	TRUE	FALSE	-0.0560516	NA	NA
ENSMUSG00000070080	Mir431	12	109590447	1	12 F1	anti-Rtl1	dist_12	M	FALSE	NA	FALSE	NA	NA	NA
ENSMUSG00000070072	Mir433	12	109591715	1	12 F1	anti-Rtl1	dist_12	M	FALSE	NA	FALSE	NA	NA	NA
ENSMUSG00000070076	Mir127	12	109592846	1	12 F1	anti-Rtl1	dist_12	M	FALSE	NA	FALSE	NA	NA	NA
ENSMUSG00000070133	Mir434	12	109594506	1	12 F1	anti-Rtl1	dist_12	M	FALSE	NA	FALSE	NA	NA	NA
ENSMUSG00000087855	Mir432	12	109594956	1	12 F1	anti-Rtl1	dist_12	M	FALSE	NA	FALSE	NA	NA	NA
ENSMUSG00000104858	Mir136	12	109595327	1	12 F1	anti-Rtl1	dist_12	M	FALSE	NA	FALSE	NA	NA	NA
ENSMUSG00000065433	Mir370	12	109618258	1	12 F1	Rian	dist_12	M	FALSE	NA	FALSE	NA	NA	NA
ENSMUSG00000088294	AF357425	12	109636012	1	12 F1	Rian	dist_12	M	FALSE	NA	FALSE	NA	NA	NA
NA	AF357426	12	109642838	1	12 F1	Rian	dist_12	M	FALSE	NA	FALSE	NA	NA	NA
NA	AF357359	12	109650709	1	12 F1	Rian	dist_12	M	FALSE	NA	FALSE	NA	NA	NA
ENSMUSG00000064621	Gm26922	12	109654627	1	12 F1	Rian	dist_12	M	FALSE	NA	FALSE	NA	NA	NA
ENSMUSG00000065749	AF357428	12	109679945	1	12 F1	Rian	dist_12	M	FALSE	NA	FALSE	NA	NA	NA
ENSMUSG00000065022	AF357341	12	109681519	1	12 F1	Rian	dist_12	M	FALSE	NA	FALSE	NA	NA	NA
ENSMUSG00000065477	Mir411	12	109710175	1	12 F1	Mirg	dist_12	M	FALSE	NA	FALSE	NA	NA	NA
ENSMUSG00000104582	Mir380	12	109711803	1	12 F1	Mirg	dist_12	M	FALSE	NA	FALSE	NA	NA	NA
ENSMUSG00000105853	Mir376b	12	109723458	1	12 F1	Mirg	dist_12	M	FALSE	NA	FALSE	NA	NA	NA
ENSMUSG00000065426	Mir134	12	109734139	1	12 F1	Mirg	dist_12	M	FALSE	NA	FALSE	NA	NA	NA
ENSMUSG00000065448	Mir154	12	109738433	1	12 F1	Mirg	dist_12	M	FALSE	NA	FALSE	NA	NA	NA
ENSMUSG00000065497	Mir410	12	109743715	1	12 F1	Mirg	dist_12	M	FALSE	NA	FALSE	NA	NA	NA
ENSMUSG00000075707	Dio3	12	110279068	1	12 F1	NA	dist_12	P	TRUE	FALSE	FALSE	-0.238988	NA	NA
ENSMUSG00000104213	Ighd	12	113406604	-1	NA	NA	dist_12	M	FALSE	NA	FALSE	NA	NA	NA
NA	DLK1 downstream transcripts	12	NA	NA	12 F1	NA	NA	P	FALSE	NA	FALSE	NA	NA	NA
NA	Mico1	12	NA	NA	12 F1	NA	NA	M	FALSE	NA	FALSE	NA	NA	NA
NA	Mico1os	12	NA	NA	12 F1	NA	NA	M	FALSE	NA	FALSE	NA	NA	NA
NA	anti-Rtl1	12	NA	NA	12 F1	anti-Rtl1	dist_12	M	FALSE	NA	FALSE	NA	NA	NA
ENSMUSG00000053101	Gpr141	13	19749682	-1	NA	NA	misc_13	M	FALSE	NA	FALSE	NA	NA	NA
ENSMUSG00000046082	Tmem174	13	98634978	-1	13 D1	NA	dist_13	P	FALSE	NA	FALSE	NA	NA	NA
ENSMUSG00000098682	Otx2os1	14	48668708	1	14 C1	NA	prox_14	P	FALSE	NA	FALSE	NA	NA	NA
ENSMUSG00000040314	Ctsg	14	56099881	-1	NA	NA	prox_14	M	FALSE	NA	FALSE	NA	NA	NA
ENSMUSG00000022156	Gzme	14	56117626	-1	NA	NA	prox_14	M	FALSE	NA	FALSE	NA	NA	NA
ENSMUSG00000059256	Gzmd	14	56129556	-1	NA	NA	prox_14	M	FALSE	NA	FALSE	NA	NA	NA
ENSMUSG00000040284	Gzmg	14	56156582	-1	NA	NA	prox_14	M	FALSE	NA	FALSE	NA	NA	NA
ENSMUSG00000015441	Gzmf	14	56205263	-1	NA	NA	prox_14	M	FALSE	NA	FALSE	NA	NA	NA
ENSMUSG00000079186	Gzmc	14	56231441	-1	NA	NA	prox_14	M	FALSE	NA	FALSE	NA	NA	NA
ENSMUSG00000033470	Cysltr2	14	73025603	-1	NA	NA	cent_14	M	FALSE	NA	FALSE	NA	NA	NA
ENSMUSG00000034997	Htr2a	14	74640840	1	14 D2	NA	cent_14	M	FALSE	NA	FALSE	NA	NA	NA
ENSMUSG00000036760	Kcnk9	15	72501089	-1	15 D3	NA	cent_15	M	FALSE	NA	FALSE	NA	NA	NA
ENSMUSG00000068391	Chrac1	15	73090392	1	15 D3	NA	cent_15	M	TRUE	FALSE	FALSE	-0.0598413	NA	NA
ENSMUSG00000116295	Gm32885	15	97157029	-1	15	NA	misc_15	P	FALSE	NA	FALSE	NA	NA	NA
ENSMUSG00000037280	Galnt6	15	100691813	-1	15 F1	NA	misc_15	P	TRUE	TRUE	FALSE	0.0736284	NA	NA
ENSMUSG00000022657	Cd96	16	46035657	-1	NA	NA	cent_16	M	FALSE	NA	FALSE	NA	NA	NA
ENSMUSG00000022651	Retnlg	16	48872621	1	NA	NA	cent_16	M	FALSE	NA	FALSE	NA	NA	NA
ENSMUSG00000097694	G730013B05Rik	16	50526245	1	16 B5	NA	cent_16	P	FALSE	NA	FALSE	NA	NA	NA
NA	XLOC_037414	17	4983739	-1	17	NA	prox_17	M	FALSE	NA	FALSE	NA	NA	NA
ENSMUSG00000073471	Rsph3a	17	7945614	1	17A1	NA	prox_17	M	TRUE	FALSE	FALSE	-0.0586909	NA	NA
ENSMUSG00000023873	1700010I14Rik	17	8988333	1	17 A1	NA	prox_17	M	TRUE	FALSE	FALSE	0.0951159	NA	NA
ENSMUSG00000023826	Prkn	17	10840384	1	17 A1	NA	prox_17	M	FALSE	NA	FALSE	NA	NA	NA
NA	XLOC_037615	17	12356364	-1	17	NA	prox_17	M	FALSE	NA	FALSE	NA	NA	NA
ENSMUSG00000023828	Slc22a3	17	12418960	-1	17 A1	NA	prox_17	M	TRUE	FALSE	FALSE	-0.425861	NA	NA
ENSMUSG00000040966	Slc22a2	17	12584132	1	17 A1	NA	prox_17	M	FALSE	NA	FALSE	NA	NA	NA
ENSMUSG00000089769	Gm16574	17	12818793	1	NA	NA	prox_17	P	TRUE	TRUE	FALSE	-0.0714286	NA	NA
ENSMUSG00000089817	Gm7162	17	12819819	-1	NA	NA	prox_17	P	TRUE	TRUE	FALSE	-0.0753968	NA	NA
ENSMUSG00000073460	Pnldc1	17	12888902	-1	NA	NA	prox_17	M	TRUE	TRUE	FALSE	0.052381	NA	NA
ENSMUSG00000067049	Unc93a	17	13108617	-1	NA	NA	prox_17	M	FALSE	NA	FALSE	NA	NA	NA
ENSMUSG00000036594	H2-Aa	17	34282744	-1	NA	NA	misc_17	M	FALSE	NA	FALSE	NA	NA	NA
NA	CrossFirre	17	NA	NA	X A5	NA	NA	M	FALSE	NA	FALSE	NA	NA	NA
ENSMUSG00000043458	Pcdhb12	18	37435621	1	18 B3	NA	misc_18	M	FALSE	NA	FALSE	NA	NA	NA
ENSMUSG00000024610	Cd74	18	60803848	1	NA	NA	misc_18	M	FALSE	NA	FALSE	NA	NA	NA
ENSMUSG00000075010	AW112010	19	11047617	-1	NA	NA	misc_19	M	FALSE	NA	FALSE	NA	NA	NA
ENSMUSG00000024673	Ms4a1	19	11249675	-1	NA	NA	misc_19	M	FALSE	NA	FALSE	NA	NA	NA
ENSMUSG00000052387	Trpm3	19	22139119	1	NA	NA	misc_19	M	FALSE	NA	FALSE	NA	NA	NA
ENSMUSG00000089679	Gm16299	19	53819354	-1	19 D2	NA	cent_19	P	FALSE	NA	FALSE	NA	NA	NA
ENSMUSG00000095180	Rhox5	X	37804842	1	X A3.3	NA	cent_X	M	FALSE	NA	FALSE	NA	NA	NA
ENSMUSG00000073125	Xlr3b	X	73192207	1	X A7	NA	dist_X	M	FALSE	NA	FALSE	NA	NA	NA
ENSMUSG00000067768	Xlr4b	X	73214333	1	X A7	NA	dist_X	M	FALSE	NA	FALSE	NA	NA	NA
ENSMUSG00000031362	Xlr4c	X	73233688	-1	X A7	NA	dist_X	M	FALSE	NA	FALSE	NA	NA	NA
ENSMUSG00000085715	Tsix	X	103431517	1	X D	NA	dist_X	P	FALSE	NA	FALSE	NA	NA	NA
ENSMUSG00000086503	Xist	X	103460366	-1	X D	NA	dist_X	P	FALSE	NA	FALSE	NA	NA	NA
ENSMUSG00000097571	Jpx	X	103493556	1	X D	NA	dist_X	P	FALSE	NA	FALSE	NA	NA	NA
ENSMUSG00000086370	Ftx	X	103560907	-1	X D	NA	dist_X	M	FALSE	NA	FALSE	NA	NA	NA
ENSMUSG00000031330	Zcchc13	X	103630586	1	X D	NA	dist_X	M	FALSE	NA	FALSE	NA	NA	NA

## Sheet: E2.75_maternal
Supplementary file 1d. Differential imprinted expression in male E2.75 B6Cast embryos, Smchd1 matΔ vs wt. A gene is called differentiallly imprinted if the multiple-testing corrected p-value is below 0.05 and the absolute difference in silent allele proportion greater than 0.05
ensembl_gene_id	gene	chromosome_name	start_position	strand	location	locus	cluster	expressed_allele	expressed	imprinted	sufficient_counts	oo_minus_wt	padj	diff_imprinted
ENSMUSG00000030199	Etv6	6	134035700	1	6 G1	NA	dist_6	P	TRUE	TRUE	TRUE	0.298642	4.63966e-05	TRUE
ENSMUSG00000025764	Jade1	3	41555731	1	3 B	NA	cent_3	P	TRUE	TRUE	TRUE	0.162151	7.71948e-05	TRUE
ENSMUSG00000100826	Snhg14	7	59307924	-1	7 C-B5	NA	cent_7	P	TRUE	TRUE	TRUE	0.0630357	0.0356943	TRUE
ENSMUSG00000019188	H13	2	152669461	1	2 H1	NA	dist_2	isoform-specific	TRUE	TRUE	TRUE	-0.237398	0.0421766	TRUE
ENSMUSG00000040013	Fkbp6	5	135291704	-1	5 G2	NA	misc_5	P	TRUE	TRUE	TRUE	-0.03611	0.000291215	FALSE
ENSMUSG00000024140	Epas1	17	86753700	1	17 E4	NA	cent_17	P	TRUE	TRUE	TRUE	0.0127588	0.0216621	FALSE
ENSMUSG00000068129	Cst7	2	150570415	1	NA	NA	dist_2	M	TRUE	TRUE	TRUE	0.10906	0.0685807	FALSE
ENSMUSG00000000948	Gm38393	7	59974149	-1	7 C-B5	NA	cent_7	P	TRUE	TRUE	TRUE	-0.00579365	0.208533	FALSE
ENSMUSG00000037280	Galnt6	15	100691813	-1	15 F1	NA	misc_15	P	TRUE	TRUE	TRUE	0.115836	0.260034	FALSE
ENSMUSG00000021848	Otx2	14	48657677	-1	14 C1	NA	prox_14	P	TRUE	TRUE	TRUE	0.013961	0.693991	FALSE
ENSMUSG00000061186	Sfmbt2	2	10370510	1	2 A1	NA	prox_2	P	TRUE	TRUE	TRUE	0.00416667	0.778615	FALSE
ENSMUSG00000082536	Gm13456	2	40555752	1	NA	NA	prox_2	M	TRUE	TRUE	TRUE	-0.0126596	0.778615	FALSE
ENSMUSG00000042814	Mcts2	2	152687035	1	2 H1	NA	dist_2	P	TRUE	TRUE	TRUE	0.00416667	0.778615	FALSE
ENSMUSG00000032359	Ctsh	9	90054152	1	9 E3.1	NA	dist_9	P	TRUE	TRUE	TRUE	0.0372037	0.778615	FALSE
ENSMUSG00000020634	Ubxn2a	12	4879032	-1	NA	NA	prox_12	P	TRUE	TRUE	TRUE	-0.0457703	0.778615	FALSE
ENSMUSG00000015143	Actn1	12	80167547	-1	12 C3	NA	misc_12	P	TRUE	TRUE	TRUE	-0.102073	0.778615	FALSE
ENSMUSG00000022641	Bbx	16	50191844	-1	16 B5	NA	cent_16	P	TRUE	TRUE	TRUE	0.00311727	0.778615	FALSE
ENSMUSG00000023861	Mpc1	17	8282904	1	17A1	NA	prox_17	M	TRUE	TRUE	TRUE	0.0433859	0.778615	FALSE
ENSMUSG00000062078	Qk	17	10202601	-1	17 A1	NA	prox_17	M	TRUE	TRUE	TRUE	0.0811069	0.778615	FALSE
ENSMUSG00000024423	Impact	18	12955852	1	18 A2-B2	NA	cent_18	P	TRUE	TRUE	TRUE	0.0029573	0.778615	FALSE
ENSMUSG00000017843	Ppp2r5c	12	110447120	1	12 F1	NA	dist_12	P	TRUE	TRUE	TRUE	-0.06899	0.833044	FALSE
ENSMUSG00000028859	Csf3r	4	126024550	1	NA	NA	misc_4	M	TRUE	TRUE	TRUE	0.0700824	0.856989	FALSE
ENSMUSG00000031665	Sall1	8	89027235	-1	NA	NA	misc_8	P	TRUE	TRUE	TRUE	-0.000910931	0.895466	FALSE
ENSMUSG00000037221	Mospd3	5	137596645	-1	5 G2	NA	misc_5	P	TRUE	TRUE	TRUE	0.00370334	1	FALSE
ENSMUSG00000002265	Peg3	7	6703892	-1	7 A2-B1	NA	prox_7	P	TRUE	TRUE	TRUE	-0.00166667	1	FALSE
ENSMUSG00000102252	Snrpn	7	59982495	-1	7 C-B5	SNURF-SNRPN	cent_7	P	TRUE	TRUE	TRUE	0	1	FALSE
ENSMUSG00000101609	Kcnq1ot1	7	143203458	-1	7 F5	NA	dist_7	P	TRUE	TRUE	TRUE	0	1	FALSE
ENSMUSG00000031714	Gab1	8	80764438	-1	8 C2	NA	misc_8	P	TRUE	TRUE	TRUE	0	1	FALSE
ENSMUSG00000018707	Dync1h1	12	110601452	1	12 F1	NA	dist_12	P	TRUE	TRUE	TRUE	-0.00626845	1	FALSE
ENSMUSG00000022464	Slc38a4	15	96994820	-1	15 F1	NA	misc_15	P	TRUE	TRUE	TRUE	0	1	FALSE
ENSMUSG00000023830	Igf2r	17	12682406	-1	17 A1	NA	prox_17	M	TRUE	TRUE	TRUE	0.0269267	1	FALSE
ENSMUSG00000025967	Eef1b2	1	63176825	1	1 C2	GPR1	cent_1	P	TRUE	FALSE	FALSE	-0.0240557	NA	FALSE
ENSMUSG00000027520	Zdbf2	1	63273265	1	1 C2	GPR1	cent_1	P	TRUE	TRUE	FALSE	-0.0166667	NA	FALSE
ENSMUSG00000009876	Cox4i2	2	152754173	1	2 H1	NA	dist_2	P	TRUE	TRUE	FALSE	0.0285714	NA	FALSE
ENSMUSG00000027523	Gnas	2	174284320	1	2 H4	Gnas	dist_2	M	TRUE	TRUE	FALSE	0	NA	FALSE
ENSMUSG00000051855	Mest	6	30723547	1	6 A3	NA	prox_6	isoform-specific	TRUE	TRUE	FALSE	0	NA	FALSE
ENSMUSG00000025607	Copg2	6	30747554	-1	6 A3	NA	prox_6	M	TRUE	FALSE	FALSE	0.0357921	NA	FALSE
ENSMUSG00000045752	Tssc4	7	143069249	1	7 F5	NA	dist_7	M	TRUE	FALSE	FALSE	0.0185511	NA	FALSE
ENSMUSG00000010760	Phlda2	7	143501545	-1	7 F5	NA	dist_7	M	TRUE	FALSE	FALSE	-0.0178571	NA	FALSE
ENSMUSG00000040111	Gramd1b	9	40293233	-1	9 A5.1	NA	misc_9	P	TRUE	TRUE	FALSE	0.0178571	NA	FALSE
ENSMUSG00000019795	Pcmt1	10	7629373	-1	10 A1	NA	misc_10	P	TRUE	FALSE	FALSE	-0.0494589	NA	FALSE
ENSMUSG00000019814	Ltv1	10	13178140	-1	NA	NA	cent_10	M	TRUE	FALSE	FALSE	-0.0384964	NA	FALSE
ENSMUSG00000025348	Itga7	10	128933818	1	NA	NA	dist_10	M	TRUE	TRUE	FALSE	0.0244451	NA	FALSE
ENSMUSG00000061469	Gm12569	11	51220473	1	11 B1.3	NA	misc_11	P	TRUE	TRUE	FALSE	0	NA	FALSE
ENSMUSG00000021266	Wars	12	108860030	-1	12 F1	NA	dist_12	P	TRUE	FALSE	FALSE	-0.0332156	NA	FALSE
ENSMUSG00000061517	Sox21	14	118233232	-1	14 E4	NA	misc_14	P	TRUE	TRUE	FALSE	0.0292208	NA	FALSE
ENSMUSG00000022139	Mbnl2	14	120275669	1	14 E4	NA	misc_14	P	TRUE	TRUE	FALSE	0	NA	FALSE
ENSMUSG00000068391	Chrac1	15	73090392	1	15 D3	NA	cent_15	M	TRUE	FALSE	FALSE	-0.00660498	NA	FALSE
ENSMUSG00000036698	Ago2	15	73095844	-1	15 D3	NA	cent_15	M	TRUE	FALSE	FALSE	0.000826546	NA	FALSE
ENSMUSG00000023169	Slc38a1	15	96571418	-1	15 F1	NA	misc_15	P	TRUE	TRUE	FALSE	0	NA	FALSE
ENSMUSG00000022462	Slc38a2	15	96687392	-1	15 F1	NA	misc_15	P	TRUE	TRUE	FALSE	0	NA	FALSE
ENSMUSG00000022952	Runx1	16	92601466	-1	16 C4	NA	misc_16	P	TRUE	TRUE	FALSE	0	NA	FALSE
ENSMUSG00000073460	Pnldc1	17	12888902	-1	NA	NA	prox_17	M	TRUE	FALSE	FALSE	0	NA	FALSE
ENSMUSG00000067049	Unc93a	17	13108617	-1	NA	NA	prox_17	M	TRUE	TRUE	FALSE	0	NA	FALSE
ENSMUSG00000046856	Gpr1	1	63182691	-1	1 C2	GPR1	cent_1	P	FALSE	NA	FALSE	NA	NA	NA
ENSMUSG00000025964	Adam23	1	63445891	1	1 C2	GPR1	cent_1	P	FALSE	NA	FALSE	NA	NA	NA
ENSMUSG00000026395	Ptprc	1	138062861	-1	NA	NA	misc_1	M	FALSE	NA	FALSE	NA	NA	NA
ENSMUSG00000026358	Rgs1	1	144242296	-1	NA	NA	misc_1	M	FALSE	NA	FALSE	NA	NA	NA
ENSMUSG00000026471	Mr1	1	155127277	-1	1 G3	NA	misc_1	M	FALSE	NA	FALSE	NA	NA	NA
ENSMUSG00000026470	Stx6	1	155158715	1	1 G3	NA	misc_1	M	TRUE	TRUE	FALSE	0.100397	NA	NA
ENSMUSG00000033722	BC034090	1	155212471	-1	1 G3	NA	misc_1	M	FALSE	NA	FALSE	NA	NA	NA
ENSMUSG00000026581	Sell	1	164061982	1	NA	NA	misc_1	M	FALSE	NA	FALSE	NA	NA	NA
ENSMUSG00000073494	Sh2d1b2	1	170232749	1	NA	NA	misc_1	M	FALSE	NA	FALSE	NA	NA	NA
ENSMUSG00000038421	Fcrla	1	170917576	-1	NA	NA	misc_1	M	FALSE	NA	FALSE	NA	NA	NA
NA	Zdbf2linc	1	NA	NA	1 C2	GPR1	cent_1	P	FALSE	NA	FALSE	NA	NA	NA
NA	XLOC_047844	2	10308628	-1	2	NA	prox_2	P	FALSE	NA	FALSE	NA	NA	NA
ENSMUSG00000086748	Gm13261	2	10339283	-1	NA	NA	prox_2	P	FALSE	NA	FALSE	NA	NA	NA
ENSMUSG00000026770	Il2ra	2	11642807	1	NA	NA	prox_2	M	FALSE	NA	FALSE	NA	NA	NA
ENSMUSG00000087701	Gm13493	2	51871126	-1	NA	NA	prox_2	M	TRUE	NA	FALSE	NaN	NA	NA
ENSMUSG00000026970	Rbms1	2	60750193	-1	2 C1.2	NA	prox_2	P	TRUE	TRUE	FALSE	0.355299	NA	NA
ENSMUSG00000081833	Gm13669	2	75808358	1	NA	NA	prox_2	M	TRUE	TRUE	FALSE	0.110565	NA	NA
ENSMUSG00000016458	Wt1	2	105126529	1	2 E2-E3	NA	prox_2	M	FALSE	NA	FALSE	NA	NA	NA
ENSMUSG00000040093	Bmf	2	118528757	-1	NA	NA	prox_2	M	TRUE	FALSE	FALSE	0.0595238	NA	NA
ENSMUSG00000042745	Id1	2	152736251	1	2 H1	NA	dist_2	P	TRUE	TRUE	FALSE	0.112753	NA	NA
ENSMUSG00000007659	Bcl2l1	2	152780668	-1	2 H1	NA	dist_2	P	TRUE	FALSE	FALSE	0.0648929	NA	NA
ENSMUSG00000027469	Tpx2	2	152847964	1	2 H1	NA	dist_2	P	TRUE	FALSE	FALSE	-0.0683408	NA	NA
ENSMUSG00000067787	Blcap	2	157556362	-1	2 H1	NA	dist_2	isoform-specific	TRUE	TRUE	FALSE	-0.08125	NA	NA
ENSMUSG00000067786	Nnat	2	157560078	1	2 H1	NA	dist_2	P	TRUE	NA	FALSE	NaN	NA	NA
ENSMUSG00000074622	Mafb	2	160363703	-1	2 H2	NA	dist_2	M	FALSE	NA	FALSE	NA	NA	NA
ENSMUSG00000027551	Zfp64	2	168893331	-1	2 H3	NA	dist_2	P	TRUE	TRUE	FALSE	-0.248117	NA	NA
ENSMUSG00000008999	Bmp7	2	172868012	-1	2 H3	NA	dist_2	P	FALSE	NA	FALSE	NA	NA	NA
ENSMUSG00000027522	Stx16	2	174076308	1	2 H4	NA	dist_2	M	TRUE	TRUE	FALSE	0.113753	NA	NA
ENSMUSG00000039263	Npepl1	2	174110349	1	2 H4	NA	dist_2	M	TRUE	TRUE	FALSE	-0.0753968	NA	NA
ENSMUSG00000065521	Mir296	2	174267047	-1	2 H4	Gnas	dist_2	P	FALSE	NA	FALSE	NA	NA	NA
ENSMUSG00000065410	Mir298	2	174267504	-1	2 H4	Gnas	dist_2	P	FALSE	NA	FALSE	NA	NA	NA
ENSMUSG00000086537	Nespas	2	174281237	-1	2 H4	Gnas	dist_2	P	TRUE	NA	FALSE	NaN	NA	NA
ENSMUSG00000027524	Edn3	2	174760619	1	2 H4	Gnas	dist_2	P	FALSE	NA	FALSE	NA	NA	NA
NA	NESP55	2	NA	NA	2 H4	Gnas	dist_2	M	FALSE	NA	FALSE	NA	NA	NA
NA	GNASXL	2	NA	NA	2 H4	Gnas	dist_2	P	FALSE	NA	FALSE	NA	NA	NA
NA	Exon-1A	2	NA	NA	2 H4	Gnas	dist_2	P	FALSE	NA	FALSE	NA	NA	NA
NA	GS-alpha	2	NA	NA	2 H4	Gnas	dist_2	M	FALSE	NA	FALSE	NA	NA	NA
NA	F7	2	NA	NA	2 H4	Gnas	dist_2	M	FALSE	NA	FALSE	NA	NA	NA
ENSMUSG00000001865	Cpa3	3	20215620	-1	NA	NA	misc_3	M	FALSE	NA	FALSE	NA	NA	NA
ENSMUSG00000105260	Gm40040	3	41477577	-1	NA	NA	cent_3	P	TRUE	TRUE	FALSE	-0.1	NA	NA
ENSMUSG00000097639	Platr4	3	41484024	-1	3 B	NA	cent_3	P	TRUE	TRUE	FALSE	0.266667	NA	NA
ENSMUSG00000106223	2400006e01Rik	3	41521247	-1	3 B	NA	cent_3	P	TRUE	TRUE	FALSE	0.157761	NA	NA
ENSMUSG00000027955	Gask1b	3	79884533	1	3 E3	NA	misc_3	P	TRUE	TRUE	FALSE	0.210317	NA	NA
ENSMUSG00000028078	Dclk2	3	86786151	-1	NA	NA	misc_3	M	TRUE	TRUE	FALSE	0.321429	NA	NA
ENSMUSG00000056071	S100a9	3	90692632	-1	NA	NA	misc_3	M	FALSE	NA	FALSE	NA	NA	NA
ENSMUSG00000087119	Atg4a-ps	3	103643954	-1	NA	NA	misc_3	M	FALSE	NA	FALSE	NA	NA	NA
ENSMUSG00000028339	Col15a1	4	47208161	1	NA	NA	misc_4	M	FALSE	NA	FALSE	NA	NA	NA
ENSMUSG00000083219	Gm11410	4	80003989	1	NA	NA	misc_4	M	TRUE	TRUE	FALSE	0.0555556	NA	NA
ENSMUSG00000028581	Laptm5	4	130913125	1	NA	NA	misc_4	M	FALSE	NA	FALSE	NA	NA	NA
ENSMUSG00000029096	Htra3	5	35652023	-1	5 B3	NA	prox_5	M	FALSE	NA	FALSE	NA	NA	NA
ENSMUSG00000029304	Spp1	5	104435118	1	NA	NA	misc_5	M	FALSE	NA	FALSE	NA	NA	NA
ENSMUSG00000097287	D130017N08Rik	5	143758354	1	5 G2	NA	misc_5	P	FALSE	NA	FALSE	NA	NA	NA
ENSMUSG00000042817	Flt3	5	147330741	-1	NA	NA	misc_5	P	FALSE	NA	FALSE	NA	NA	NA
ENSMUSG00000023964	Calcr	6	3685680	-1	6 A1	NA	prox_6	M	FALSE	NA	FALSE	NA	NA	NA
ENSMUSG00000029664	Tfpi2	6	3962595	-1	6 A1	NA	prox_6	M	FALSE	NA	FALSE	NA	NA	NA
ENSMUSG00000015189	Casd1	6	4600839	1	6 A1	NA	prox_6	M	TRUE	TRUE	FALSE	0.333333	NA	NA
ENSMUSG00000004631	Sgce	6	4674350	-1	6 A1	NA	prox_6	P	TRUE	TRUE	FALSE	-0.17197	NA	NA
ENSMUSG00000092035	Peg10	6	4747306	1	6 A1	NA	prox_6	P	FALSE	NA	FALSE	NA	NA	NA
ENSMUSG00000032827	Ppp1r9a	6	4902917	1	6 A1	NA	prox_6	M	TRUE	TRUE	FALSE	0.163154	NA	NA
ENSMUSG00000042607	Asb4	6	5383386	1	6 A1	NA	prox_6	M	FALSE	NA	FALSE	NA	NA	NA
ENSMUSG00000029775	Klhdc10	6	30401868	1	6 A3	NA	prox_6	M	TRUE	TRUE	FALSE	0.0744792	NA	NA
ENSMUSG00000065501	Mir335	6	30741299	1	6 A3	NA	prox_6	P	FALSE	NA	FALSE	NA	NA	NA
ENSMUSG00000039032	Tsga13	6	30896981	-1	6 A3.3	NA	prox_6	M	FALSE	NA	FALSE	NA	NA	NA
ENSMUSG00000073209	Klf14	6	30956023	-1	6 A3	NA	prox_6	M	FALSE	NA	FALSE	NA	NA	NA
ENSMUSG00000076490	Trbc1	6	41538218	1	NA	NA	prox_6	M	FALSE	NA	FALSE	NA	NA	NA
ENSMUSG00000029804	Herc3	6	58831465	1	6 B3	NA	prox_6	isoform-specific	TRUE	TRUE	FALSE	-0.3	NA	NA
ENSMUSG00000055430	Nap1l5	6	58905233	-1	6 C1	NA	prox_6	P	FALSE	NA	FALSE	NA	NA	NA
ENSMUSG00000025889	Snca	6	60731575	-1	NA	NA	prox_6	M	FALSE	NA	FALSE	NA	NA	NA
ENSMUSG00000030114	Klrg1	6	122270596	-1	NA	NA	dist_6	M	FALSE	NA	FALSE	NA	NA	NA
ENSMUSG00000108090	Gm6637	6	122295664	1	NA	NA	dist_6	M	FALSE	NA	FALSE	NA	NA	NA
NA	Copg2os1	6	NA	NA	6 A3	NA	prox_6	P	FALSE	NA	FALSE	NA	NA	NA
ENSMUSG00000108113	Zim2	7	6651748	-1	7 A2-B1	NA	prox_7	M	FALSE	NA	FALSE	NA	NA	NA
ENSMUSG00000002266	Zim1	7	6671269	-1	7 A2-B1	NA	prox_7	M	FALSE	NA	FALSE	NA	NA	NA
ENSMUSG00000051527	Usp29	7	6730578	1	7 A2-B1	NA	prox_7	P	TRUE	FALSE	FALSE	-0.329976	NA	NA
ENSMUSG00000108043	Zim3	7	6955685	-1	7 A2-B1	NA	prox_7	M	FALSE	NA	FALSE	NA	NA	NA
ENSMUSG00000109176	Zfp264	7	6977246	1	7 A2-B1	NA	prox_7	P	TRUE	TRUE	FALSE	-0.42	NA	NA
ENSMUSG00000002602	Axl	7	25757273	-1	7 A3-B1	NA	misc_7	M	FALSE	NA	FALSE	NA	NA	NA
ENSMUSG00000030579	Tyrobp	7	30413760	1	NA	NA	misc_7	M	FALSE	NA	FALSE	NA	NA	NA
ENSMUSG00000025326	Ube3a	7	59228750	1	7 C-B5	NA	cent_7	M	TRUE	FALSE	FALSE	-0.163088	NA	NA
ENSMUSG00000077191	Snord64	7	59978808	-1	7C-B5	SNURF-SNRPN	cent_7	P	FALSE	NA	FALSE	NA	NA	NA
ENSMUSG00000089375	Snord107	7	59980876	-1	7C-B5	SNURF-SNRPN	cent_7	P	FALSE	NA	FALSE	NA	NA	NA
ENSMUSG00000102627	Snurf	7	59995449	-1	7 C-B5	SNURF-SNRPN	cent_7	P	FALSE	NA	FALSE	NA	NA	NA
NA	XLOC_075991	7	60641818	-1	7	NA	cent_7	P	FALSE	NA	FALSE	NA	NA	NA
ENSMUSG00000109006	B230209E15Rik	7	61529871	-1	7 C-B5	NA	cent_7	P	FALSE	NA	FALSE	NA	NA	NA
ENSMUSG00000109394	A230057D06Rik	7	61704519	-1	7 C-B5	NA	cent_7	P	FALSE	NA	FALSE	NA	NA	NA
ENSMUSG00000109321	A330076H08Rik	7	61930137	-1	7 C-B5	NA	cent_7	P	FALSE	NA	FALSE	NA	NA	NA
ENSMUSG00000045813	Gm9801	7	62094506	-1	7 C-B5	NA	cent_7	P	FALSE	NA	FALSE	NA	NA	NA
ENSMUSG00000033585	Ndn	7	62346569	1	7 C-B5	NA	cent_7	P	TRUE	TRUE	FALSE	NaN	NA	NA
ENSMUSG00000056972	Magel2	7	62377010	1	7 C-B5	NA	cent_7	P	FALSE	NA	FALSE	NA	NA	NA
ENSMUSG00000070527	Mkrn3	7	62417593	-1	7 C-B5	NA	cent_7	P	TRUE	TRUE	FALSE	0.916667	NA	NA
ENSMUSG00000070526	Peg12	7	62461871	-1	7 C-B5	NA	cent_7	P	FALSE	NA	FALSE	NA	NA	NA
ENSMUSG00000030638	Sh3gl3	7	82173840	1	7 D3	NA	misc_7	P	FALSE	NA	FALSE	NA	NA	NA
ENSMUSG00000030724	Cd19	7	126408450	-1	NA	NA	distcent_7	M	FALSE	NA	FALSE	NA	NA	NA
ENSMUSG00000030782	Tgfb1i1	7	128246812	1	7 F3	NA	distcent_7	M	FALSE	NA	FALSE	NA	NA	NA
ENSMUSG00000030847	Bag3	7	128523616	1	7 F3	NA	distcent_7	M	TRUE	FALSE	FALSE	0.0741057	NA	NA
ENSMUSG00000042105	Inpp5f	7	128611328	1	7 F3	NA	distcent_7	P	TRUE	TRUE	FALSE	-0.121796	NA	NA
ENSMUSG00000045777	Ifitm10	7	142325837	-1	7 F5	NA	dist_7	M	FALSE	NA	FALSE	NA	NA	NA
ENSMUSG00000018819	Lsp1	7	142460809	1	7 F5	NA	dist_7	M	FALSE	NA	FALSE	NA	NA	NA
ENSMUSG00000087090	Nctc1	7	142544609	-1	7 F5	NA	dist_7	P	FALSE	NA	FALSE	NA	NA	NA
ENSMUSG00000000031	H19	7	142575529	-1	7 F5	NA	dist_7	M	FALSE	NA	FALSE	NA	NA	NA
ENSMUSG00000048583	Igf2	7	142650766	-1	7 F5	NA	dist_7	P	FALSE	NA	FALSE	NA	NA	NA
ENSMUSG00000086266	Igf2os	7	142659693	1	7 F5	NA	dist_7	P	FALSE	NA	FALSE	NA	NA	NA
ENSMUSG00000000215	Ins2	7	142678656	-1	7 F5	NA	dist_7	P	FALSE	NA	FALSE	NA	NA	NA
ENSMUSG00000000214	Th	7	142892752	-1	7 F5	NA	dist_7	M	FALSE	NA	FALSE	NA	NA	NA
ENSMUSG00000009248	Ascl2	7	142966829	-1	7 F5	NA	dist_7	M	FALSE	NA	FALSE	NA	NA	NA
ENSMUSG00000059277	R74862	7	143021784	-1	7 F5	NA	dist_7	M	FALSE	NA	FALSE	NA	NA	NA
ENSMUSG00000037706	Cd81	7	143052739	1	7 F5	NA	dist_7	M	FALSE	NA	FALSE	NA	NA	NA
ENSMUSG00000009545	Kcnq1	7	143106362	1	7 F5	NA	dist_7	M	FALSE	NA	FALSE	NA	NA	NA
ENSMUSG00000037664	Cdkn1c	7	143458339	-1	7 F5	NA	dist_7	M	TRUE	TRUE	FALSE	-0.104762	NA	NA
NA	AF313042	7	143462528	NA	7 F5	NA	dist_7	M	FALSE	NA	FALSE	NA	NA	NA
ENSMUSG00000000154	Slc22a18	7	143473736	1	7 F5	NA	dist_7	M	FALSE	NA	FALSE	NA	NA	NA
ENSMUSG00000059119	Nap1l4	7	143513579	-1	7 F5	NA	dist_7	M	TRUE	FALSE	FALSE	-0.100982	NA	NA
ENSMUSG00000045362	Tnfrsf26	7	143607659	-1	7 F5	NA	dist_7	M	FALSE	NA	FALSE	NA	NA	NA
ENSMUSG00000109251	E230032D23Rik	7	143628024	1	7	NA	dist_7	M	FALSE	NA	FALSE	NA	NA	NA
ENSMUSG00000010751	Tnfrsf22	7	143634806	-1	7 F5	NA	dist_7	M	TRUE	TRUE	FALSE	0.0833333	NA	NA
ENSMUSG00000037613	Tnfrsf23	7	143665809	-1	7 F5	NA	dist_7	M	TRUE	TRUE	FALSE	0.0833333	NA	NA
ENSMUSG00000037606	Osbpl5	7	143688762	-1	7 F5	NA	dist_7	M	TRUE	TRUE	FALSE	-0.0833333	NA	NA
ENSMUSG00000031075	Ano1	7	144588549	-1	7 F5	NA	dist_7	M	FALSE	NA	FALSE	NA	NA	NA
NA	Peg3os	7	NA	NA	7 A1	NA	prox_7	P	FALSE	NA	FALSE	NA	NA	NA
NA	Mkrn3os	7	NA	NA	7C-B5	NA	cent_7	P	FALSE	NA	FALSE	NA	NA	NA
NA	BM117114	7	NA	NA	7C-B5	NA	cent_7	P	FALSE	NA	FALSE	NA	NA	NA
NA	Pec2	7	NA	NA	7C-B5	NA	cent_7	P	FALSE	NA	FALSE	NA	NA	NA
NA	BB077283	7	NA	NA	7C-B5	NA	cent_7	P	FALSE	NA	FALSE	NA	NA	NA
NA	Pec3	7	NA	NA	7C-B5	NA	cent_7	P	FALSE	NA	FALSE	NA	NA	NA
NA	Snord116_cluster	7	NA	NA	7C-B5	pwcr1	cent_7	P	FALSE	NA	FALSE	NA	NA	NA
NA	Snord115_cluster	7	NA	NA	7C-B5	pwcr1	cent_7	P	FALSE	NA	FALSE	NA	NA	NA
NA	U80893	7	NA	NA	7C-B5	NA	cent_7	P	FALSE	NA	FALSE	NA	NA	NA
NA	PIHit	7	NA	NA	7 F5	NA	dist_7	P	FALSE	NA	FALSE	NA	NA	NA
NA	Tsci1	8	80859408	1	8	NA	misc_8	P	FALSE	NA	FALSE	NA	NA	NA
ENSMUSG00000031962	Cdh15	8	122847966	1	8 E1	NA	misc_8	isoform-specific	FALSE	NA	FALSE	NA	NA	NA
ENSMUSG00000032094	Cd3d	9	44981786	1	NA	NA	misc_9	M	FALSE	NA	FALSE	NA	NA	NA
ENSMUSG00000032299	Commd4	9	57155035	-1	NA	NA	misc_9	P	TRUE	FALSE	FALSE	0.0507712	NA	NA
ENSMUSG00000032280	Tle3	9	61372366	1	9 B	NA	misc_9	P	TRUE	TRUE	FALSE	0.335301	NA	NA
ENSMUSG00000040204	Pclaf	9	65890237	1	NA	NA	misc_9	P	FALSE	NA	FALSE	NA	NA	NA
ENSMUSG00000032422	Snx14	9	88376750	-1	9 E3.1	NA	dist_9	P	TRUE	TRUE	FALSE	-0.0671938	NA	NA
ENSMUSG00000065596	Mir184	9	89802260	-1	9 E3.1	NA	dist_9	P	FALSE	NA	FALSE	NA	NA	NA
ENSMUSG00000098627	4930524O08Rik	9	89826519	1	9 E3.1	NA	dist_9	P	FALSE	NA	FALSE	NA	NA	NA
ENSMUSG00000032356	Rasgrf1	9	89909908	1	9 E3.1	NA	dist_9	P	TRUE	TRUE	FALSE	0.166667	NA	NA
ENSMUSG00000032454	Rbp2	9	98486115	1	9 E3.3	NA	dist_9	P	FALSE	NA	FALSE	NA	NA	NA
NA	AS4	9	NA	1	9 E3.1	NA	dist_9	P	FALSE	NA	FALSE	NA	NA	NA
ENSMUSG00000019817	Plagl1	10	13060504	1	10 A2	NA	cent_10	P	FALSE	NA	FALSE	NA	NA	NA
ENSMUSG00000062866	Phactr2	10	13207717	-1	10 A1	NA	cent_10	M	FALSE	NA	FALSE	NA	NA	NA
ENSMUSG00000037202	Prf1	10	61297833	1	NA	NA	mid_10	M	FALSE	NA	FALSE	NA	NA	NA
ENSMUSG00000000290	Itgb2	10	77530252	1	NA	NA	mid_10	M	FALSE	NA	FALSE	NA	NA	NA
ENSMUSG00000025383	Il23a	10	128296139	-1	NA	NA	dist_10	M	TRUE	TRUE	FALSE	-0.10352	NA	NA
ENSMUSG00000020182	Ddc	11	11814101	-1	11 A1	NA	prox_11	P	TRUE	FALSE	FALSE	-0.201705	NA	NA
ENSMUSG00000020176	Grb10	11	11930508	-1	11 A1	NA	prox_11	isoform-specific	TRUE	TRUE	FALSE	-0.306997	NA	NA
NA	XLOC_011039	11	12037523	1	11	NA	misc_11	M	FALSE	NA	FALSE	NA	NA	NA
NA	Tsci2	11	12151320	1	11	NA	misc_11	M	FALSE	NA	FALSE	NA	NA	NA
ENSMUSG00000020173	Cobl	11	12236608	-1	11 A1	NA	prox_11	M	FALSE	NA	FALSE	NA	NA	NA
ENSMUSG00000051650	B3gnt2	11	22759738	-1	11 A3.2	NA	prox_11	M	FALSE	NA	FALSE	NA	NA	NA
ENSMUSG00000051355	Commd1	11	22896136	-1	11 A3	NA	prox_11	isoform-specific	TRUE	FALSE	FALSE	-0.213853	NA	NA
ENSMUSG00000044068	Zrsr1	11	22972005	1	11 A3	NA	prox_11	P	TRUE	TRUE	FALSE	-0.0733333	NA	NA
ENSMUSG00000020399	Havcr2	11	46454935	1	NA	NA	misc_11	M	FALSE	NA	FALSE	NA	NA	NA
ENSMUSG00000036545	Adamts2	11	50602084	1	11 B1.3	NA	misc_11	P	TRUE	TRUE	FALSE	0.416667	NA	NA
ENSMUSG00000086646	Platr20	11	51189833	-1	11 B1.3	NA	misc_11	P	FALSE	NA	FALSE	NA	NA	NA
ENSMUSG00000045942	BC049762	11	51253651	-1	11 B1.3	NA	misc_11	P	FALSE	NA	FALSE	NA	NA	NA
ENSMUSG00000085860	2410003L11Rik	11	97598511	1	11 D	NA	misc_11	P	TRUE	TRUE	FALSE	0.0666667	NA	NA
ENSMUSG00000043439	Epop	11	97627389	-1	NA	NA	misc_11	P	TRUE	TRUE	FALSE	0.0839744	NA	NA
ENSMUSG00000035112	Wnk4	11	101260567	1	11 D	NA	misc_11	M	FALSE	NA	FALSE	NA	NA	NA
ENSMUSG00000039963	Ccdc40	11	119228572	1	11 E2	NA	misc_11	P	TRUE	FALSE	FALSE	0.157923	NA	NA
ENSMUSG00000066632	Pgk1-rs7	12	10898986	-1	NA	NA	misc_12	M	FALSE	NA	FALSE	NA	NA	NA
ENSMUSG00000112546	Gm6992	12	31018218	1	NA	NA	misc_12	P	FALSE	NA	FALSE	NA	NA	NA
NA	Tsci4	12	81007809	-1	12	NA	misc_12	P	FALSE	NA	FALSE	NA	NA	NA
ENSMUSG00000021136	Smoc1	12	81026808	1	12 D1	NA	misc_12	P	TRUE	TRUE	FALSE	0.0666667	NA	NA
ENSMUSG00000047415	Gpr68	12	100876682	-1	12 F1	NA	dist_12	M	FALSE	NA	FALSE	NA	NA	NA
ENSMUSG00000040867	Begain	12	109032187	-1	12 F1	NA	dist_12	P	FALSE	NA	FALSE	NA	NA	NA
ENSMUSG00000040856	Dlk1	12	109452823	1	12 F1	NA	dist_12	P	FALSE	NA	FALSE	NA	NA	NA
ENSMUSG00000112977	Gm34081	12	109493529	-1	12	NA	dist_12	M	FALSE	NA	FALSE	NA	NA	NA
ENSMUSG00000021268	Meg3	12	109541001	1	12 F1	NA	dist_12	M	FALSE	NA	FALSE	NA	NA	NA
ENSMUSG00000065526	Mir337	12	109585789	1	12 F1	NA	dist_12	M	FALSE	NA	FALSE	NA	NA	NA
ENSMUSG00000085925	Rtl1	12	109589193	-1	12 F1	NA	dist_12	P	FALSE	NA	FALSE	NA	NA	NA
ENSMUSG00000070080	Mir431	12	109590447	1	12 F1	anti-Rtl1	dist_12	M	FALSE	NA	FALSE	NA	NA	NA
ENSMUSG00000070072	Mir433	12	109591715	1	12 F1	anti-Rtl1	dist_12	M	FALSE	NA	FALSE	NA	NA	NA
ENSMUSG00000070076	Mir127	12	109592846	1	12 F1	anti-Rtl1	dist_12	M	FALSE	NA	FALSE	NA	NA	NA
ENSMUSG00000070133	Mir434	12	109594506	1	12 F1	anti-Rtl1	dist_12	M	FALSE	NA	FALSE	NA	NA	NA
ENSMUSG00000087855	Mir432	12	109594956	1	12 F1	anti-Rtl1	dist_12	M	FALSE	NA	FALSE	NA	NA	NA
ENSMUSG00000104858	Mir136	12	109595327	1	12 F1	anti-Rtl1	dist_12	M	FALSE	NA	FALSE	NA	NA	NA
ENSMUSG00000097451	Rian	12	109603940	1	12 F1	NA	dist_12	M	FALSE	NA	FALSE	NA	NA	NA
ENSMUSG00000065433	Mir370	12	109618258	1	12 F1	Rian	dist_12	M	FALSE	NA	FALSE	NA	NA	NA
ENSMUSG00000088294	AF357425	12	109636012	1	12 F1	Rian	dist_12	M	FALSE	NA	FALSE	NA	NA	NA
NA	AF357426	12	109642838	1	12 F1	Rian	dist_12	M	FALSE	NA	FALSE	NA	NA	NA
NA	AF357359	12	109650709	1	12 F1	Rian	dist_12	M	FALSE	NA	FALSE	NA	NA	NA
ENSMUSG00000064621	Gm26922	12	109654627	1	12 F1	Rian	dist_12	M	FALSE	NA	FALSE	NA	NA	NA
ENSMUSG00000065749	AF357428	12	109679945	1	12 F1	Rian	dist_12	M	FALSE	NA	FALSE	NA	NA	NA
ENSMUSG00000065022	AF357341	12	109681519	1	12 F1	Rian	dist_12	M	FALSE	NA	FALSE	NA	NA	NA
ENSMUSG00000065477	Mir411	12	109710175	1	12 F1	Mirg	dist_12	M	FALSE	NA	FALSE	NA	NA	NA
ENSMUSG00000104582	Mir380	12	109711803	1	12 F1	Mirg	dist_12	M	FALSE	NA	FALSE	NA	NA	NA
ENSMUSG00000105853	Mir376b	12	109723458	1	12 F1	Mirg	dist_12	M	FALSE	NA	FALSE	NA	NA	NA
ENSMUSG00000097391	Mirg	12	109729764	1	12 F1	Mirg	dist_12	M	FALSE	NA	FALSE	NA	NA	NA
ENSMUSG00000065426	Mir134	12	109734139	1	12 F1	Mirg	dist_12	M	FALSE	NA	FALSE	NA	NA	NA
ENSMUSG00000065448	Mir154	12	109738433	1	12 F1	Mirg	dist_12	M	FALSE	NA	FALSE	NA	NA	NA
ENSMUSG00000065497	Mir410	12	109743715	1	12 F1	Mirg	dist_12	M	FALSE	NA	FALSE	NA	NA	NA
ENSMUSG00000075707	Dio3	12	110279068	1	12 F1	NA	dist_12	P	FALSE	NA	FALSE	NA	NA	NA
ENSMUSG00000104213	Ighd	12	113406604	-1	NA	NA	dist_12	M	FALSE	NA	FALSE	NA	NA	NA
NA	DLK1 downstream transcripts	12	NA	NA	12 F1	NA	NA	P	FALSE	NA	FALSE	NA	NA	NA
NA	Mico1	12	NA	NA	12 F1	NA	NA	M	FALSE	NA	FALSE	NA	NA	NA
NA	Mico1os	12	NA	NA	12 F1	NA	NA	M	FALSE	NA	FALSE	NA	NA	NA
NA	anti-Rtl1	12	NA	NA	12 F1	anti-Rtl1	dist_12	M	FALSE	NA	FALSE	NA	NA	NA
ENSMUSG00000053101	Gpr141	13	19749682	-1	NA	NA	misc_13	M	FALSE	NA	FALSE	NA	NA	NA
ENSMUSG00000018259	Prl8a2	13	27345673	1	NA	NA	cent_13	M	FALSE	NA	FALSE	NA	NA	NA
ENSMUSG00000016477	E2f3	13	29906575	-1	13 A3.2	NA	cent_13	P	TRUE	TRUE	FALSE	0.0888889	NA	NA
ENSMUSG00000044231	Nhlrc1	13	47012557	-1	13 A5	NA	cent_13	P	FALSE	NA	FALSE	NA	NA	NA
ENSMUSG00000047842	Diras2	13	52504380	-1	NA	NA	cent_13	M	FALSE	NA	FALSE	NA	NA	NA
ENSMUSG00000041773	Enc1	13	97241105	1	13 D1	NA	dist_13	P	TRUE	TRUE	FALSE	0.203739	NA	NA
ENSMUSG00000046082	Tmem174	13	98634978	-1	13 D1	NA	dist_13	P	FALSE	NA	FALSE	NA	NA	NA
ENSMUSG00000021699	Pde4d	13	108449948	1	13 D2	NA	dist_13	P	FALSE	NA	FALSE	NA	NA	NA
ENSMUSG00000098682	Otx2os1	14	48668708	1	14 C1	NA	prox_14	P	FALSE	NA	FALSE	NA	NA	NA
ENSMUSG00000040314	Ctsg	14	56099881	-1	NA	NA	prox_14	M	FALSE	NA	FALSE	NA	NA	NA
ENSMUSG00000022156	Gzme	14	56117626	-1	NA	NA	prox_14	M	FALSE	NA	FALSE	NA	NA	NA
ENSMUSG00000059256	Gzmd	14	56129556	-1	NA	NA	prox_14	M	FALSE	NA	FALSE	NA	NA	NA
ENSMUSG00000040284	Gzmg	14	56156582	-1	NA	NA	prox_14	M	FALSE	NA	FALSE	NA	NA	NA
ENSMUSG00000015441	Gzmf	14	56205263	-1	NA	NA	prox_14	M	FALSE	NA	FALSE	NA	NA	NA
ENSMUSG00000079186	Gzmc	14	56231441	-1	NA	NA	prox_14	M	FALSE	NA	FALSE	NA	NA	NA
ENSMUSG00000033470	Cysltr2	14	73025603	-1	NA	NA	cent_14	M	FALSE	NA	FALSE	NA	NA	NA
ENSMUSG00000034997	Htr2a	14	74640840	1	14 D2	NA	cent_14	M	FALSE	NA	FALSE	NA	NA	NA
ENSMUSG00000036760	Kcnk9	15	72501089	-1	15 D3	NA	cent_15	M	FALSE	NA	FALSE	NA	NA	NA
ENSMUSG00000047921	Trappc9	15	72589620	-1	15 D3	NA	cent_15	isoform-specific	TRUE	TRUE	FALSE	-0.07069	NA	NA
ENSMUSG00000106847	Peg13	15	72805600	-1	15 D3	NA	cent_15	P	FALSE	NA	FALSE	NA	NA	NA
ENSMUSG00000000489	Pdgfb	15	79995874	-1	15 E1	NA	cent_15	P	FALSE	NA	FALSE	NA	NA	NA
ENSMUSG00000116295	Gm32885	15	97157029	-1	15	NA	misc_15	P	FALSE	NA	FALSE	NA	NA	NA
ENSMUSG00000022657	Cd96	16	46035657	-1	NA	NA	cent_16	M	FALSE	NA	FALSE	NA	NA	NA
ENSMUSG00000022651	Retnlg	16	48872621	1	NA	NA	cent_16	M	FALSE	NA	FALSE	NA	NA	NA
ENSMUSG00000097694	G730013B05Rik	16	50526245	1	16 B5	NA	cent_16	P	FALSE	NA	FALSE	NA	NA	NA
ENSMUSG00000022639	Dubr	16	50719294	-1	NA	NA	cent_16	P	TRUE	TRUE	FALSE	0.0714286	NA	NA
NA	XLOC_037414	17	4983739	-1	17	NA	prox_17	M	FALSE	NA	FALSE	NA	NA	NA
ENSMUSG00000069729	Arid1b	17	4994332	1	17 A1	NA	prox_17	M	TRUE	FALSE	FALSE	-0.094393	NA	NA
ENSMUSG00000034265	Zdhhc14	17	5492557	1	17A1	NA	prox_17	M	FALSE	NA	FALSE	NA	NA	NA
ENSMUSG00000073471	Rsph3a	17	7945614	1	17A1	NA	prox_17	M	FALSE	NA	FALSE	NA	NA	NA
ENSMUSG00000023868	Pde10a	17	8525372	1	17A1	NA	prox_17	M	FALSE	NA	FALSE	NA	NA	NA
ENSMUSG00000023873	1700010I14Rik	17	8988333	1	17 A1	NA	prox_17	M	FALSE	NA	FALSE	NA	NA	NA
ENSMUSG00000037196	Pacrg	17	10403012	-1	17 A1	NA	prox_17	M	FALSE	NA	FALSE	NA	NA	NA
ENSMUSG00000023826	Prkn	17	10840384	1	17 A1	NA	prox_17	M	TRUE	TRUE	FALSE	0.9	NA	NA
NA	XLOC_037615	17	12356364	-1	17	NA	prox_17	M	FALSE	NA	FALSE	NA	NA	NA
ENSMUSG00000023828	Slc22a3	17	12418960	-1	17 A1	NA	prox_17	M	FALSE	NA	FALSE	NA	NA	NA
ENSMUSG00000040966	Slc22a2	17	12584132	1	17 A1	NA	prox_17	M	FALSE	NA	FALSE	NA	NA	NA
ENSMUSG00000078247	Airn	17	12741311	1	17 A1	NA	prox_17	P	FALSE	NA	FALSE	NA	NA	NA
ENSMUSG00000089769	Gm16574	17	12818793	1	NA	NA	prox_17	P	FALSE	NA	FALSE	NA	NA	NA
ENSMUSG00000089817	Gm7162	17	12819819	-1	NA	NA	prox_17	P	FALSE	NA	FALSE	NA	NA	NA
ENSMUSG00000048826	Dact2	17	14195052	-1	17 A2	NA	prox_17	M	FALSE	NA	FALSE	NA	NA	NA
ENSMUSG00000023886	Smoc2	17	14279506	1	17 A2	NA	prox_17	M	FALSE	NA	FALSE	NA	NA	NA
ENSMUSG00000023885	Thbs2	17	14665500	-1	17 A2	NA	prox_17	M	FALSE	NA	FALSE	NA	NA	NA
ENSMUSG00000036594	H2-Aa	17	34282744	-1	NA	NA	misc_17	M	TRUE	TRUE	FALSE	0.125	NA	NA
NA	CrossFirre	17	NA	NA	X A5	NA	NA	M	FALSE	NA	FALSE	NA	NA	NA
ENSMUSG00000043458	Pcdhb12	18	37435621	1	18 B3	NA	misc_18	M	FALSE	NA	FALSE	NA	NA	NA
ENSMUSG00000024610	Cd74	18	60803848	1	NA	NA	misc_18	M	TRUE	TRUE	FALSE	-0.0833333	NA	NA
ENSMUSG00000044906	4930503L19Rik	18	70452212	-1	NA	NA	misc_18	P	TRUE	TRUE	FALSE	-0.375	NA	NA
ENSMUSG00000075010	AW112010	19	11047617	-1	NA	NA	misc_19	M	FALSE	NA	FALSE	NA	NA	NA
ENSMUSG00000024673	Ms4a1	19	11249675	-1	NA	NA	misc_19	M	FALSE	NA	FALSE	NA	NA	NA
ENSMUSG00000052387	Trpm3	19	22139119	1	NA	NA	misc_19	M	FALSE	NA	FALSE	NA	NA	NA
ENSMUSG00000048720	Tbc1d12	19	38836579	1	19 C3	NA	cent_19	P	FALSE	NA	FALSE	NA	NA	NA
ENSMUSG00000089679	Gm16299	19	53819354	-1	19 D2	NA	cent_19	P	FALSE	NA	FALSE	NA	NA	NA
ENSMUSG00000095180	Rhox5	X	37804842	1	X A3.3	NA	cent_X	M	FALSE	NA	FALSE	NA	NA	NA
ENSMUSG00000073125	Xlr3b	X	73192207	1	X A7	NA	dist_X	M	FALSE	NA	FALSE	NA	NA	NA
ENSMUSG00000067768	Xlr4b	X	73214333	1	X A7	NA	dist_X	M	FALSE	NA	FALSE	NA	NA	NA
ENSMUSG00000031362	Xlr4c	X	73233688	-1	X A7	NA	dist_X	M	FALSE	NA	FALSE	NA	NA	NA
ENSMUSG00000085715	Tsix	X	103431517	1	X D	NA	dist_X	P	FALSE	NA	FALSE	NA	NA	NA
ENSMUSG00000086503	Xist	X	103460366	-1	X D	NA	dist_X	P	FALSE	NA	FALSE	NA	NA	NA
ENSMUSG00000097571	Jpx	X	103493556	1	X D	NA	dist_X	P	FALSE	NA	FALSE	NA	NA	NA
ENSMUSG00000086370	Ftx	X	103560907	-1	X D	NA	dist_X	M	FALSE	NA	FALSE	NA	NA	NA
ENSMUSG00000031330	Zcchc13	X	103630586	1	X D	NA	dist_X	M	FALSE	NA	FALSE	NA	NA	NA

## Sheet: E14.5_matzyg_matvswt
Supplementary file 1e. Differential imprinted expression in male E14.5 B6(CastB6) placentae, Smchd1 matΔ vs wt. A gene is called differentiallly imprinted if the multiple-testing corrected p-value is below 0.05 and the absolute difference in silent allele proportion greater than 0.05
ensembl_gene_id	gene	chromosome_name	start_position	strand	location	locus	cluster	expressed_allele	expressed	imprinted	sufficient_counts	oo_minus_wt	padj	diff_imprinted
ENSMUSG00000002265	Peg3	7	6703892	-1	7 A2-B1	NA	prox_7	P	TRUE	TRUE	TRUE	0.308109	3.07378e-10	TRUE
ENSMUSG00000022464	Slc38a4	15	96994820	-1	15 F1	NA	misc_15	P	TRUE	TRUE	TRUE	0.222041	8.29882e-10	TRUE
ENSMUSG00000056972	Magel2	7	62377010	1	7 C-B5	NA	cent_7	P	TRUE	TRUE	TRUE	0.169933	1.13074e-09	TRUE
ENSMUSG00000009248	Ascl2	7	142966829	-1	7 F5	NA	dist_7	M	TRUE	TRUE	TRUE	0.136231	2.52107e-07	TRUE
ENSMUSG00000051855	Mest	6	30723547	1	6 A3	NA	prox_6	isoform-specific	TRUE	TRUE	TRUE	0.120737	7.31135e-07	TRUE
ENSMUSG00000033585	Ndn	7	62346569	1	7 C-B5	NA	cent_7	P	TRUE	TRUE	TRUE	0.215336	4.02357e-06	TRUE
ENSMUSG00000023828	Slc22a3	17	12418960	-1	17 A1	NA	prox_17	M	TRUE	TRUE	TRUE	0.104782	8.38557e-06	TRUE
ENSMUSG00000023868	Pde10a	17	8525372	1	17A1	NA	prox_17	M	TRUE	TRUE	TRUE	0.112032	1.03373e-05	TRUE
ENSMUSG00000070526	Peg12	7	62461871	-1	7 C-B5	NA	cent_7	P	TRUE	TRUE	TRUE	0.235156	0.000131096	TRUE
ENSMUSG00000097639	Platr4	3	41484024	-1	3 B	NA	cent_3	P	TRUE	TRUE	TRUE	0.249695	0.00173482	TRUE
ENSMUSG00000085860	2410003L11Rik	11	97598511	1	11 D	NA	misc_11	P	TRUE	TRUE	TRUE	0.172603	0.00173482	TRUE
ENSMUSG00000027551	Zfp64	2	168893331	-1	2 H3	NA	dist_2	P	TRUE	TRUE	TRUE	0.108033	0.00527742	TRUE
ENSMUSG00000024423	Impact	18	12955852	1	18 A2-B2	NA	cent_18	P	TRUE	TRUE	TRUE	0.103581	0.0202369	TRUE
ENSMUSG00000051527	Usp29	7	6730578	1	7 A2-B1	NA	prox_7	P	TRUE	TRUE	TRUE	0.0947572	0.0261545	TRUE
ENSMUSG00000043439	Epop	11	97627389	-1	NA	NA	misc_11	P	TRUE	TRUE	TRUE	0.09425	0.148554	FALSE
ENSMUSG00000037664	Cdkn1c	7	143458339	-1	7 F5	NA	dist_7	M	TRUE	TRUE	TRUE	0.00866196	0.19505	FALSE
ENSMUSG00000028339	Col15a1	4	47208161	1	NA	NA	misc_4	M	TRUE	TRUE	TRUE	-0.0814868	0.197183	FALSE
ENSMUSG00000027520	Zdbf2	1	63273265	1	1 C2	GPR1	cent_1	P	TRUE	TRUE	TRUE	0.0711554	0.237198	FALSE
ENSMUSG00000000031	H19	7	142575529	-1	7 F5	NA	dist_7	M	TRUE	TRUE	TRUE	0.0292514	0.244977	FALSE
ENSMUSG00000025764	Jade1	3	41555731	1	3 B	NA	cent_3	P	TRUE	TRUE	TRUE	0.0747743	0.293386	FALSE
ENSMUSG00000056071	S100a9	3	90692632	-1	NA	NA	misc_3	M	TRUE	TRUE	TRUE	-0.14972	0.340391	FALSE
ENSMUSG00000010760	Phlda2	7	143501545	-1	7 F5	NA	dist_7	M	TRUE	TRUE	TRUE	0.0718546	0.345077	FALSE
ENSMUSG00000059256	Gzmd	14	56129556	-1	NA	NA	prox_14	M	TRUE	TRUE	TRUE	0.0326224	0.345077	FALSE
ENSMUSG00000036594	H2-Aa	17	34282744	-1	NA	NA	misc_17	M	TRUE	TRUE	TRUE	-0.0535249	0.345077	FALSE
ENSMUSG00000061186	Sfmbt2	2	10370510	1	2 A1	NA	prox_2	P	TRUE	TRUE	TRUE	0.02765	0.389948	FALSE
ENSMUSG00000070527	Mkrn3	7	62417593	-1	7 C-B5	NA	cent_7	P	TRUE	TRUE	TRUE	0.118153	0.389948	FALSE
ENSMUSG00000019814	Ltv1	10	13178140	-1	NA	NA	cent_10	M	TRUE	TRUE	TRUE	0.056377	0.389948	FALSE
ENSMUSG00000062866	Phactr2	10	13207717	-1	10 A1	NA	cent_10	M	TRUE	TRUE	TRUE	-0.055513	0.389948	FALSE
ENSMUSG00000000290	Itgb2	10	77530252	1	NA	NA	mid_10	M	TRUE	TRUE	TRUE	0.0783456	0.400168	FALSE
ENSMUSG00000016458	Wt1	2	105126529	1	2 E2-E3	NA	prox_2	M	TRUE	TRUE	TRUE	-0.0697135	0.443695	FALSE
ENSMUSG00000019817	Plagl1	10	13060504	1	10 A2	NA	cent_10	P	TRUE	TRUE	TRUE	0.0195947	0.454204	FALSE
ENSMUSG00000025607	Copg2	6	30747554	-1	6 A3	NA	prox_6	M	TRUE	TRUE	TRUE	0.0960666	0.531251	FALSE
ENSMUSG00000073460	Pnldc1	17	12888902	-1	NA	NA	prox_17	M	TRUE	TRUE	TRUE	0.136104	0.531251	FALSE
ENSMUSG00000023885	Thbs2	17	14665500	-1	17 A2	NA	prox_17	M	TRUE	TRUE	TRUE	0.034838	0.606396	FALSE
ENSMUSG00000023830	Igf2r	17	12682406	-1	17 A1	NA	prox_17	M	TRUE	TRUE	TRUE	0.0223399	0.617811	FALSE
ENSMUSG00000028581	Laptm5	4	130913125	1	NA	NA	misc_4	M	TRUE	TRUE	TRUE	-0.0485176	0.686742	FALSE
ENSMUSG00000032359	Ctsh	9	90054152	1	9 E3.1	NA	dist_9	P	TRUE	TRUE	TRUE	0.0320195	0.687691	FALSE
ENSMUSG00000044068	Zrsr1	11	22972005	1	11 A3	NA	prox_11	P	TRUE	TRUE	TRUE	0.0207051	0.691925	FALSE
ENSMUSG00000022156	Gzme	14	56117626	-1	NA	NA	prox_14	M	TRUE	TRUE	TRUE	0.022307	0.691925	FALSE
ENSMUSG00000083219	Gm11410	4	80003989	1	NA	NA	misc_4	M	TRUE	TRUE	TRUE	0.0109319	0.748405	FALSE
ENSMUSG00000092035	Peg10	6	4747306	1	6 A1	NA	prox_6	P	TRUE	TRUE	TRUE	0.00407757	0.822907	FALSE
ENSMUSG00000082536	Gm13456	2	40555752	1	NA	NA	prox_2	M	TRUE	TRUE	TRUE	0.0102006	0.831493	FALSE
ENSMUSG00000045942	BC049762	11	51253651	-1	11 B1.3	NA	misc_11	P	TRUE	TRUE	TRUE	-0.0738769	0.831493	FALSE
ENSMUSG00000075707	Dio3	12	110279068	1	12 F1	NA	dist_12	P	TRUE	TRUE	TRUE	0.0974216	0.831493	FALSE
ENSMUSG00000069729	Arid1b	17	4994332	1	17 A1	NA	prox_17	M	TRUE	TRUE	TRUE	0.0150028	0.831493	FALSE
ENSMUSG00000000154	Slc22a18	7	143473736	1	7 F5	NA	dist_7	M	TRUE	TRUE	TRUE	0.0246163	0.876799	FALSE
ENSMUSG00000037606	Osbpl5	7	143688762	-1	7 F5	NA	dist_7	M	TRUE	TRUE	TRUE	-0.0234657	0.876799	FALSE
ENSMUSG00000097391	Mirg	12	109729764	1	12 F1	Mirg	dist_12	M	TRUE	TRUE	TRUE	0.00945861	0.876799	FALSE
ENSMUSG00000048583	Igf2	7	142650766	-1	7 F5	NA	dist_7	P	TRUE	TRUE	TRUE	0.00417432	0.879043	FALSE
ENSMUSG00000034265	Zdhhc14	17	5492557	1	17A1	NA	prox_17	M	TRUE	TRUE	TRUE	0.0222025	0.879043	FALSE
ENSMUSG00000081833	Gm13669	2	75808358	1	NA	NA	prox_2	M	TRUE	TRUE	TRUE	-0.0281013	0.891621	FALSE
ENSMUSG00000019188	H13	2	152669461	1	2 H1	NA	dist_2	isoform-specific	TRUE	TRUE	TRUE	-0.0146333	0.891621	FALSE
ENSMUSG00000008999	Bmp7	2	172868012	-1	2 H3	NA	dist_2	P	TRUE	TRUE	TRUE	0.0452386	0.891621	FALSE
ENSMUSG00000040013	Fkbp6	5	135291704	-1	5 G2	NA	misc_5	P	TRUE	TRUE	TRUE	0.00109072	0.891621	FALSE
ENSMUSG00000032827	Ppp1r9a	6	4902917	1	6 A1	NA	prox_6	M	TRUE	TRUE	TRUE	-0.022815	0.891621	FALSE
ENSMUSG00000029775	Klhdc10	6	30401868	1	6 A3	NA	prox_6	M	TRUE	TRUE	TRUE	0.0290016	0.891621	FALSE
ENSMUSG00000002266	Zim1	7	6671269	-1	7 A2-B1	NA	prox_7	M	TRUE	TRUE	TRUE	0.00256341	0.891621	FALSE
ENSMUSG00000100826	Snhg14	7	59307924	-1	7 C-B5	NA	cent_7	P	TRUE	TRUE	TRUE	-0.00716009	0.891621	FALSE
ENSMUSG00000000948	Gm38393	7	59974149	-1	7 C-B5	NA	cent_7	P	TRUE	TRUE	TRUE	-0.00451178	0.891621	FALSE
ENSMUSG00000102252	Snrpn	7	59982495	-1	7 C-B5	SNURF-SNRPN	cent_7	P	TRUE	TRUE	TRUE	-0.00304559	0.891621	FALSE
ENSMUSG00000086266	Igf2os	7	142659693	1	7 F5	NA	dist_7	P	TRUE	TRUE	TRUE	0.0035027	0.891621	FALSE
ENSMUSG00000101609	Kcnq1ot1	7	143203458	-1	7 F5	NA	dist_7	P	TRUE	TRUE	TRUE	0.000757444	0.891621	FALSE
ENSMUSG00000045362	Tnfrsf26	7	143607659	-1	7 F5	NA	dist_7	M	TRUE	TRUE	TRUE	0.0274223	0.891621	FALSE
ENSMUSG00000037613	Tnfrsf23	7	143665809	-1	7 F5	NA	dist_7	M	TRUE	TRUE	TRUE	0.0149091	0.891621	FALSE
ENSMUSG00000031075	Ano1	7	144588549	-1	7 F5	NA	dist_7	M	TRUE	TRUE	TRUE	-0.0132527	0.891621	FALSE
ENSMUSG00000031714	Gab1	8	80764438	-1	8 C2	NA	misc_8	P	TRUE	TRUE	TRUE	-0.0107578	0.891621	FALSE
ENSMUSG00000020176	Grb10	11	11930508	-1	11 A1	NA	prox_11	isoform-specific	TRUE	TRUE	TRUE	-0.0213285	0.891621	FALSE
ENSMUSG00000021136	Smoc1	12	81026808	1	12 D1	NA	misc_12	P	TRUE	TRUE	TRUE	0.013611	0.891621	FALSE
ENSMUSG00000021268	Meg3	12	109541001	1	12 F1	NA	dist_12	M	TRUE	TRUE	TRUE	0.00166949	0.891621	FALSE
ENSMUSG00000079186	Gzmc	14	56231441	-1	NA	NA	prox_14	M	TRUE	TRUE	TRUE	0	0.891621	FALSE
ENSMUSG00000106847	Peg13	15	72805600	-1	15 D3	NA	cent_15	P	TRUE	TRUE	TRUE	0.00965138	0.891621	FALSE
ENSMUSG00000036698	Ago2	15	73095844	-1	15 D3	NA	cent_15	M	TRUE	TRUE	TRUE	0.0202632	0.891621	FALSE
ENSMUSG00000097694	G730013B05Rik	16	50526245	1	16 B5	NA	cent_16	P	TRUE	TRUE	TRUE	0.111859	0.891621	FALSE
ENSMUSG00000023861	Mpc1	17	8282904	1	17A1	NA	prox_17	M	TRUE	TRUE	TRUE	-0.0145397	0.891621	FALSE
ENSMUSG00000078247	Airn	17	12741311	1	17 A1	NA	prox_17	P	TRUE	TRUE	TRUE	0.0183356	0.891621	FALSE
ENSMUSG00000089817	Gm7162	17	12819819	-1	NA	NA	prox_17	P	TRUE	TRUE	TRUE	0.0073499	0.891621	FALSE
ENSMUSG00000048826	Dact2	17	14195052	-1	17 A2	NA	prox_17	M	TRUE	TRUE	TRUE	0.0112459	0.891621	FALSE
ENSMUSG00000024610	Cd74	18	60803848	1	NA	NA	misc_18	M	TRUE	TRUE	TRUE	-0.0055914	0.891621	FALSE
ENSMUSG00000075010	AW112010	19	11047617	-1	NA	NA	misc_19	M	TRUE	TRUE	TRUE	0.0124904	0.891621	FALSE
ENSMUSG00000097451	Rian	12	109603940	1	12 F1	NA	dist_12	M	TRUE	TRUE	TRUE	0.00242071	0.896816	FALSE
ENSMUSG00000085925	Rtl1	12	109589193	-1	12 F1	NA	dist_12	P	TRUE	TRUE	TRUE	-0.00721216	0.8995	FALSE
ENSMUSG00000029096	Htra3	5	35652023	-1	5 B3	NA	prox_5	M	TRUE	TRUE	TRUE	0.0544488	0.905153	FALSE
ENSMUSG00000027523	Gnas	2	174284320	1	2 H4	Gnas	dist_2	M	TRUE	TRUE	TRUE	-0.0298779	0.912699	FALSE
ENSMUSG00000086748	Gm13261	2	10339283	-1	NA	NA	prox_2	P	TRUE	TRUE	TRUE	0.0082122	0.915635	FALSE
ENSMUSG00000004631	Sgce	6	4674350	-1	6 A1	NA	prox_6	P	TRUE	TRUE	TRUE	-0.00888784	0.932065	FALSE
ENSMUSG00000042607	Asb4	6	5383386	1	6 A1	NA	prox_6	M	TRUE	TRUE	TRUE	0.0108627	0.933218	FALSE
ENSMUSG00000045752	Tssc4	7	143069249	1	7 F5	NA	dist_7	M	TRUE	TRUE	TRUE	0.0121206	0.933218	FALSE
ENSMUSG00000040856	Dlk1	12	109452823	1	12 F1	NA	dist_12	P	TRUE	TRUE	TRUE	0.00317692	0.933218	FALSE
ENSMUSG00000029304	Spp1	5	104435118	1	NA	NA	misc_5	M	TRUE	TRUE	TRUE	0.0168586	0.94812	FALSE
ENSMUSG00000073209	Klf14	6	30956023	-1	6 A3	NA	prox_6	M	TRUE	TRUE	TRUE	-0.00587544	0.94812	FALSE
ENSMUSG00000040284	Gzmg	14	56156582	-1	NA	NA	prox_14	M	TRUE	TRUE	TRUE	-0.00352113	0.94812	FALSE
ENSMUSG00000042814	Mcts2	2	152687035	1	2 H1	NA	dist_2	P	TRUE	TRUE	TRUE	-0.00629454	0.956505	FALSE
ENSMUSG00000031962	Cdh15	8	122847966	1	8 E1	NA	misc_8	isoform-specific	TRUE	TRUE	TRUE	0.0142443	0.956505	FALSE
ENSMUSG00000026395	Ptprc	1	138062861	-1	NA	NA	misc_1	M	TRUE	TRUE	TRUE	0.0132648	0.987528	FALSE
ENSMUSG00000009545	Kcnq1	7	143106362	1	7 F5	NA	dist_7	M	TRUE	TRUE	TRUE	-0.0354356	0.987528	FALSE
ENSMUSG00000037202	Prf1	10	61297833	1	NA	NA	mid_10	M	TRUE	TRUE	TRUE	0	0.987528	FALSE
ENSMUSG00000073471	Rsph3a	17	7945614	1	17A1	NA	prox_17	M	TRUE	TRUE	TRUE	-0.00555375	0.987528	FALSE
ENSMUSG00000023886	Smoc2	17	14279506	1	17 A2	NA	prox_17	M	TRUE	TRUE	TRUE	0.00538791	0.987528	FALSE
ENSMUSG00000087119	Atg4a-ps	3	103643954	-1	NA	NA	misc_3	M	TRUE	TRUE	TRUE	0	0.991142	FALSE
ENSMUSG00000086646	Platr20	11	51189833	-1	11 B1.3	NA	misc_11	P	TRUE	TRUE	TRUE	-0.0277732	0.991142	FALSE
ENSMUSG00000023826	Prkn	17	10840384	1	17 A1	NA	prox_17	M	TRUE	TRUE	TRUE	-0.0139698	0.991142	FALSE
ENSMUSG00000025967	Eef1b2	1	63176825	1	1 C2	GPR1	cent_1	P	TRUE	FALSE	FALSE	0.0119075	NA	FALSE
ENSMUSG00000046856	Gpr1	1	63182691	-1	1 C2	GPR1	cent_1	P	TRUE	FALSE	FALSE	0.0385662	NA	FALSE
ENSMUSG00000025964	Adam23	1	63445891	1	1 C2	GPR1	cent_1	P	TRUE	FALSE	FALSE	0.0266344	NA	FALSE
ENSMUSG00000026470	Stx6	1	155158715	1	1 G3	NA	misc_1	M	TRUE	FALSE	FALSE	-0.0092039	NA	FALSE
ENSMUSG00000033722	BC034090	1	155212471	-1	1 G3	NA	misc_1	M	TRUE	FALSE	FALSE	-0.00299751	NA	FALSE
ENSMUSG00000026970	Rbms1	2	60750193	-1	2 C1.2	NA	prox_2	P	TRUE	FALSE	FALSE	0.000775558	NA	FALSE
ENSMUSG00000040093	Bmf	2	118528757	-1	NA	NA	prox_2	M	TRUE	FALSE	FALSE	-0.0382038	NA	FALSE
ENSMUSG00000042745	Id1	2	152736251	1	2 H1	NA	dist_2	P	TRUE	FALSE	FALSE	0.0240905	NA	FALSE
ENSMUSG00000007659	Bcl2l1	2	152780668	-1	2 H1	NA	dist_2	P	TRUE	FALSE	FALSE	-0.0136228	NA	FALSE
ENSMUSG00000027469	Tpx2	2	152847964	1	2 H1	NA	dist_2	P	TRUE	FALSE	FALSE	0.033036	NA	FALSE
ENSMUSG00000067787	Blcap	2	157556362	-1	2 H1	NA	dist_2	isoform-specific	TRUE	FALSE	FALSE	-0.00315438	NA	FALSE
ENSMUSG00000074622	Mafb	2	160363703	-1	2 H2	NA	dist_2	M	TRUE	FALSE	FALSE	-0.0143565	NA	FALSE
ENSMUSG00000027522	Stx16	2	174076308	1	2 H4	NA	dist_2	M	TRUE	FALSE	FALSE	0.0108424	NA	FALSE
ENSMUSG00000039263	Npepl1	2	174110349	1	2 H4	NA	dist_2	M	TRUE	FALSE	FALSE	0.00953613	NA	FALSE
ENSMUSG00000106223	2400006e01Rik	3	41521247	-1	3 B	NA	cent_3	P	TRUE	TRUE	FALSE	0.0254552	NA	FALSE
ENSMUSG00000027955	Gask1b	3	79884533	1	3 E3	NA	misc_3	P	TRUE	FALSE	FALSE	0.0212778	NA	FALSE
ENSMUSG00000037221	Mospd3	5	137596645	-1	5 G2	NA	misc_5	P	TRUE	FALSE	FALSE	0.00923379	NA	FALSE
ENSMUSG00000015189	Casd1	6	4600839	1	6 A1	NA	prox_6	M	TRUE	FALSE	FALSE	0.0073697	NA	FALSE
ENSMUSG00000029804	Herc3	6	58831465	1	6 B3	NA	prox_6	isoform-specific	TRUE	FALSE	FALSE	-0.0171816	NA	FALSE
ENSMUSG00000025889	Snca	6	60731575	-1	NA	NA	prox_6	M	TRUE	FALSE	FALSE	-0.00843235	NA	FALSE
ENSMUSG00000030199	Etv6	6	134035700	1	6 G1	NA	dist_6	P	TRUE	FALSE	FALSE	0.0428148	NA	FALSE
ENSMUSG00000002602	Axl	7	25757273	-1	7 A3-B1	NA	misc_7	M	TRUE	FALSE	FALSE	0.00460184	NA	FALSE
ENSMUSG00000025326	Ube3a	7	59228750	1	7 C-B5	NA	cent_7	M	TRUE	FALSE	FALSE	-0.000343908	NA	FALSE
ENSMUSG00000030782	Tgfb1i1	7	128246812	1	7 F3	NA	distcent_7	M	TRUE	FALSE	FALSE	-0.0400353	NA	FALSE
ENSMUSG00000030847	Bag3	7	128523616	1	7 F3	NA	distcent_7	M	TRUE	FALSE	FALSE	0.00654194	NA	FALSE
ENSMUSG00000042105	Inpp5f	7	128611328	1	7 F3	NA	distcent_7	P	TRUE	FALSE	FALSE	-0.00364149	NA	FALSE
ENSMUSG00000045777	Ifitm10	7	142325837	-1	7 F5	NA	dist_7	M	TRUE	FALSE	FALSE	0.0052676	NA	FALSE
ENSMUSG00000018819	Lsp1	7	142460809	1	7 F5	NA	dist_7	M	TRUE	FALSE	FALSE	0.0151212	NA	FALSE
ENSMUSG00000000214	Th	7	142892752	-1	7 F5	NA	dist_7	M	TRUE	FALSE	FALSE	0.0495816	NA	FALSE
ENSMUSG00000037706	Cd81	7	143052739	1	7 F5	NA	dist_7	M	TRUE	FALSE	FALSE	-0.0112029	NA	FALSE
ENSMUSG00000059119	Nap1l4	7	143513579	-1	7 F5	NA	dist_7	M	TRUE	FALSE	FALSE	-0.00517964	NA	FALSE
ENSMUSG00000040111	Gramd1b	9	40293233	-1	9 A5.1	NA	misc_9	P	TRUE	FALSE	FALSE	-0.00137888	NA	FALSE
ENSMUSG00000032299	Commd4	9	57155035	-1	NA	NA	misc_9	P	TRUE	FALSE	FALSE	-0.0332993	NA	FALSE
ENSMUSG00000032280	Tle3	9	61372366	1	9 B	NA	misc_9	P	TRUE	FALSE	FALSE	-0.00791156	NA	FALSE
ENSMUSG00000040204	Pclaf	9	65890237	1	NA	NA	misc_9	P	TRUE	FALSE	FALSE	0.0180475	NA	FALSE
ENSMUSG00000032422	Snx14	9	88376750	-1	9 E3.1	NA	dist_9	P	TRUE	FALSE	FALSE	-0.00152309	NA	FALSE
ENSMUSG00000019795	Pcmt1	10	7629373	-1	10 A1	NA	misc_10	P	TRUE	FALSE	FALSE	-0.00974343	NA	FALSE
ENSMUSG00000020173	Cobl	11	12236608	-1	11 A1	NA	prox_11	M	TRUE	FALSE	FALSE	0.0245346	NA	FALSE
ENSMUSG00000036545	Adamts2	11	50602084	1	11 B1.3	NA	misc_11	P	TRUE	FALSE	FALSE	-0.019746	NA	FALSE
ENSMUSG00000061469	Gm12569	11	51220473	1	11 B1.3	NA	misc_11	P	TRUE	FALSE	FALSE	-0.0231027	NA	FALSE
ENSMUSG00000020634	Ubxn2a	12	4879032	-1	NA	NA	prox_12	P	TRUE	FALSE	FALSE	-0.037213	NA	FALSE
ENSMUSG00000015143	Actn1	12	80167547	-1	12 C3	NA	misc_12	P	TRUE	FALSE	FALSE	0.00262199	NA	FALSE
ENSMUSG00000021266	Wars	12	108860030	-1	12 F1	NA	dist_12	P	TRUE	FALSE	FALSE	0.0177914	NA	FALSE
ENSMUSG00000017843	Ppp2r5c	12	110447120	1	12 F1	NA	dist_12	P	TRUE	FALSE	FALSE	-0.0214745	NA	FALSE
ENSMUSG00000018707	Dync1h1	12	110601452	1	12 F1	NA	dist_12	P	TRUE	FALSE	FALSE	0.0128847	NA	FALSE
ENSMUSG00000016477	E2f3	13	29906575	-1	13 A3.2	NA	cent_13	P	TRUE	FALSE	FALSE	-0.00474099	NA	FALSE
ENSMUSG00000041773	Enc1	13	97241105	1	13 D1	NA	dist_13	P	TRUE	FALSE	FALSE	-0.0033868	NA	FALSE
ENSMUSG00000022139	Mbnl2	14	120275669	1	14 E4	NA	misc_14	P	TRUE	FALSE	FALSE	0.00460473	NA	FALSE
ENSMUSG00000047921	Trappc9	15	72589620	-1	15 D3	NA	cent_15	isoform-specific	TRUE	FALSE	FALSE	-0.0433836	NA	FALSE
ENSMUSG00000068391	Chrac1	15	73090392	1	15 D3	NA	cent_15	M	TRUE	FALSE	FALSE	0.0249591	NA	FALSE
ENSMUSG00000000489	Pdgfb	15	79995874	-1	15 E1	NA	cent_15	P	TRUE	FALSE	FALSE	-0.00103248	NA	FALSE
ENSMUSG00000023169	Slc38a1	15	96571418	-1	15 F1	NA	misc_15	P	TRUE	FALSE	FALSE	0.0174327	NA	FALSE
ENSMUSG00000022462	Slc38a2	15	96687392	-1	15 F1	NA	misc_15	P	TRUE	FALSE	FALSE	0.00608233	NA	FALSE
ENSMUSG00000022641	Bbx	16	50191844	-1	16 B5	NA	cent_16	P	TRUE	FALSE	FALSE	-0.00319611	NA	FALSE
ENSMUSG00000022639	Dubr	16	50719294	-1	NA	NA	cent_16	P	TRUE	FALSE	FALSE	-0.00739149	NA	FALSE
ENSMUSG00000022952	Runx1	16	92601466	-1	16 C4	NA	misc_16	P	TRUE	FALSE	FALSE	-0.0274613	NA	FALSE
ENSMUSG00000062078	Qk	17	10202601	-1	17 A1	NA	prox_17	M	TRUE	FALSE	FALSE	-0.00276309	NA	FALSE
ENSMUSG00000024140	Epas1	17	86753700	1	17 E4	NA	cent_17	P	TRUE	FALSE	FALSE	0.00460779	NA	FALSE
ENSMUSG00000044906	4930503L19Rik	18	70452212	-1	NA	NA	misc_18	P	TRUE	FALSE	FALSE	-0.0334103	NA	FALSE
ENSMUSG00000048720	Tbc1d12	19	38836579	1	19 C3	NA	cent_19	P	TRUE	FALSE	FALSE	-0.0449939	NA	FALSE
ENSMUSG00000026358	Rgs1	1	144242296	-1	NA	NA	misc_1	M	FALSE	NA	FALSE	NA	NA	NA
ENSMUSG00000026471	Mr1	1	155127277	-1	1 G3	NA	misc_1	M	TRUE	FALSE	FALSE	0.313935	NA	NA
ENSMUSG00000026581	Sell	1	164061982	1	NA	NA	misc_1	M	FALSE	NA	FALSE	NA	NA	NA
ENSMUSG00000073494	Sh2d1b2	1	170232749	1	NA	NA	misc_1	M	FALSE	NA	FALSE	NA	NA	NA
ENSMUSG00000038421	Fcrla	1	170917576	-1	NA	NA	misc_1	M	FALSE	NA	FALSE	NA	NA	NA
NA	Zdbf2linc	1	NA	NA	1 C2	GPR1	cent_1	P	FALSE	NA	FALSE	NA	NA	NA
NA	XLOC_047844	2	10308628	-1	2	NA	prox_2	P	FALSE	NA	FALSE	NA	NA	NA
ENSMUSG00000026770	Il2ra	2	11642807	1	NA	NA	prox_2	M	FALSE	NA	FALSE	NA	NA	NA
ENSMUSG00000087701	Gm13493	2	51871126	-1	NA	NA	prox_2	M	TRUE	TRUE	FALSE	-0.166667	NA	NA
ENSMUSG00000068129	Cst7	2	150570415	1	NA	NA	dist_2	M	FALSE	NA	FALSE	NA	NA	NA
ENSMUSG00000009876	Cox4i2	2	152754173	1	2 H1	NA	dist_2	P	TRUE	FALSE	FALSE	-0.0593821	NA	NA
ENSMUSG00000067786	Nnat	2	157560078	1	2 H1	NA	dist_2	P	TRUE	TRUE	FALSE	NaN	NA	NA
ENSMUSG00000065521	Mir296	2	174267047	-1	2 H4	Gnas	dist_2	P	FALSE	NA	FALSE	NA	NA	NA
ENSMUSG00000065410	Mir298	2	174267504	-1	2 H4	Gnas	dist_2	P	FALSE	NA	FALSE	NA	NA	NA
ENSMUSG00000086537	Nespas	2	174281237	-1	2 H4	Gnas	dist_2	P	TRUE	TRUE	FALSE	-0.05	NA	NA
ENSMUSG00000027524	Edn3	2	174760619	1	2 H4	Gnas	dist_2	P	FALSE	NA	FALSE	NA	NA	NA
NA	NESP55	2	NA	NA	2 H4	Gnas	dist_2	M	FALSE	NA	FALSE	NA	NA	NA
NA	GNASXL	2	NA	NA	2 H4	Gnas	dist_2	P	FALSE	NA	FALSE	NA	NA	NA
NA	Exon-1A	2	NA	NA	2 H4	Gnas	dist_2	P	FALSE	NA	FALSE	NA	NA	NA
NA	GS-alpha	2	NA	NA	2 H4	Gnas	dist_2	M	FALSE	NA	FALSE	NA	NA	NA
NA	F7	2	NA	NA	2 H4	Gnas	dist_2	M	FALSE	NA	FALSE	NA	NA	NA
ENSMUSG00000001865	Cpa3	3	20215620	-1	NA	NA	misc_3	M	FALSE	NA	FALSE	NA	NA	NA
ENSMUSG00000105260	Gm40040	3	41477577	-1	NA	NA	cent_3	P	TRUE	FALSE	FALSE	0.0987144	NA	NA
ENSMUSG00000028078	Dclk2	3	86786151	-1	NA	NA	misc_3	M	TRUE	FALSE	FALSE	-0.112194	NA	NA
ENSMUSG00000028859	Csf3r	4	126024550	1	NA	NA	misc_4	M	TRUE	TRUE	FALSE	-0.08674	NA	NA
ENSMUSG00000097287	D130017N08Rik	5	143758354	1	5 G2	NA	misc_5	P	FALSE	NA	FALSE	NA	NA	NA
ENSMUSG00000042817	Flt3	5	147330741	-1	NA	NA	misc_5	P	TRUE	FALSE	FALSE	-0.0937425	NA	NA
ENSMUSG00000023964	Calcr	6	3685680	-1	6 A1	NA	prox_6	M	FALSE	NA	FALSE	NA	NA	NA
ENSMUSG00000029664	Tfpi2	6	3962595	-1	6 A1	NA	prox_6	M	TRUE	FALSE	FALSE	-0.443591	NA	NA
ENSMUSG00000065501	Mir335	6	30741299	1	6 A3	NA	prox_6	P	FALSE	NA	FALSE	NA	NA	NA
ENSMUSG00000039032	Tsga13	6	30896981	-1	6 A3.3	NA	prox_6	M	FALSE	NA	FALSE	NA	NA	NA
ENSMUSG00000076490	Trbc1	6	41538218	1	NA	NA	prox_6	M	FALSE	NA	FALSE	NA	NA	NA
ENSMUSG00000055430	Nap1l5	6	58905233	-1	6 C1	NA	prox_6	P	FALSE	NA	FALSE	NA	NA	NA
ENSMUSG00000030114	Klrg1	6	122270596	-1	NA	NA	dist_6	M	FALSE	NA	FALSE	NA	NA	NA
ENSMUSG00000108090	Gm6637	6	122295664	1	NA	NA	dist_6	M	FALSE	NA	FALSE	NA	NA	NA
NA	Copg2os1	6	NA	NA	6 A3	NA	prox_6	P	FALSE	NA	FALSE	NA	NA	NA
ENSMUSG00000108113	Zim2	7	6651748	-1	7 A2-B1	NA	prox_7	M	FALSE	NA	FALSE	NA	NA	NA
ENSMUSG00000108043	Zim3	7	6955685	-1	7 A2-B1	NA	prox_7	M	FALSE	NA	FALSE	NA	NA	NA
ENSMUSG00000109176	Zfp264	7	6977246	1	7 A2-B1	NA	prox_7	P	FALSE	NA	FALSE	NA	NA	NA
ENSMUSG00000030579	Tyrobp	7	30413760	1	NA	NA	misc_7	M	TRUE	FALSE	FALSE	-0.228491	NA	NA
ENSMUSG00000077191	Snord64	7	59978808	-1	7C-B5	SNURF-SNRPN	cent_7	P	FALSE	NA	FALSE	NA	NA	NA
ENSMUSG00000089375	Snord107	7	59980876	-1	7C-B5	SNURF-SNRPN	cent_7	P	FALSE	NA	FALSE	NA	NA	NA
ENSMUSG00000102627	Snurf	7	59995449	-1	7 C-B5	SNURF-SNRPN	cent_7	P	FALSE	NA	FALSE	NA	NA	NA
NA	XLOC_075991	7	60641818	-1	7	NA	cent_7	P	FALSE	NA	FALSE	NA	NA	NA
ENSMUSG00000109006	B230209E15Rik	7	61529871	-1	7 C-B5	NA	cent_7	P	FALSE	NA	FALSE	NA	NA	NA
ENSMUSG00000109394	A230057D06Rik	7	61704519	-1	7 C-B5	NA	cent_7	P	FALSE	NA	FALSE	NA	NA	NA
ENSMUSG00000109321	A330076H08Rik	7	61930137	-1	7 C-B5	NA	cent_7	P	FALSE	NA	FALSE	NA	NA	NA
ENSMUSG00000045813	Gm9801	7	62094506	-1	7 C-B5	NA	cent_7	P	FALSE	NA	FALSE	NA	NA	NA
ENSMUSG00000030638	Sh3gl3	7	82173840	1	7 D3	NA	misc_7	P	TRUE	FALSE	FALSE	0.138404	NA	NA
ENSMUSG00000030724	Cd19	7	126408450	-1	NA	NA	distcent_7	M	FALSE	NA	FALSE	NA	NA	NA
ENSMUSG00000087090	Nctc1	7	142544609	-1	7 F5	NA	dist_7	P	FALSE	NA	FALSE	NA	NA	NA
ENSMUSG00000000215	Ins2	7	142678656	-1	7 F5	NA	dist_7	P	FALSE	NA	FALSE	NA	NA	NA
ENSMUSG00000059277	R74862	7	143021784	-1	7 F5	NA	dist_7	M	FALSE	NA	FALSE	NA	NA	NA
NA	AF313042	7	143462528	NA	7 F5	NA	dist_7	M	FALSE	NA	FALSE	NA	NA	NA
ENSMUSG00000109251	E230032D23Rik	7	143628024	1	7	NA	dist_7	M	FALSE	NA	FALSE	NA	NA	NA
ENSMUSG00000010751	Tnfrsf22	7	143634806	-1	7 F5	NA	dist_7	M	TRUE	TRUE	FALSE	0.0703376	NA	NA
NA	Peg3os	7	NA	NA	7 A1	NA	prox_7	P	FALSE	NA	FALSE	NA	NA	NA
NA	Mkrn3os	7	NA	NA	7C-B5	NA	cent_7	P	FALSE	NA	FALSE	NA	NA	NA
NA	BM117114	7	NA	NA	7C-B5	NA	cent_7	P	FALSE	NA	FALSE	NA	NA	NA
NA	Pec2	7	NA	NA	7C-B5	NA	cent_7	P	FALSE	NA	FALSE	NA	NA	NA
NA	BB077283	7	NA	NA	7C-B5	NA	cent_7	P	FALSE	NA	FALSE	NA	NA	NA
NA	Pec3	7	NA	NA	7C-B5	NA	cent_7	P	FALSE	NA	FALSE	NA	NA	NA
NA	Snord116_cluster	7	NA	NA	7C-B5	pwcr1	cent_7	P	FALSE	NA	FALSE	NA	NA	NA
NA	Snord115_cluster	7	NA	NA	7C-B5	pwcr1	cent_7	P	FALSE	NA	FALSE	NA	NA	NA
NA	U80893	7	NA	NA	7C-B5	NA	cent_7	P	FALSE	NA	FALSE	NA	NA	NA
NA	PIHit	7	NA	NA	7 F5	NA	dist_7	P	FALSE	NA	FALSE	NA	NA	NA
NA	Tsci1	8	80859408	1	8	NA	misc_8	P	FALSE	NA	FALSE	NA	NA	NA
ENSMUSG00000031665	Sall1	8	89027235	-1	NA	NA	misc_8	P	TRUE	FALSE	FALSE	0.054692	NA	NA
ENSMUSG00000032094	Cd3d	9	44981786	1	NA	NA	misc_9	M	FALSE	NA	FALSE	NA	NA	NA
ENSMUSG00000065596	Mir184	9	89802260	-1	9 E3.1	NA	dist_9	P	FALSE	NA	FALSE	NA	NA	NA
ENSMUSG00000098627	4930524O08Rik	9	89826519	1	9 E3.1	NA	dist_9	P	FALSE	NA	FALSE	NA	NA	NA
ENSMUSG00000032356	Rasgrf1	9	89909908	1	9 E3.1	NA	dist_9	P	TRUE	TRUE	FALSE	0.100637	NA	NA
ENSMUSG00000032454	Rbp2	9	98486115	1	9 E3.3	NA	dist_9	P	TRUE	TRUE	FALSE	-0.235229	NA	NA
NA	AS4	9	NA	1	9 E3.1	NA	dist_9	P	FALSE	NA	FALSE	NA	NA	NA
ENSMUSG00000025383	Il23a	10	128296139	-1	NA	NA	dist_10	M	FALSE	NA	FALSE	NA	NA	NA
ENSMUSG00000025348	Itga7	10	128933818	1	NA	NA	dist_10	M	TRUE	FALSE	FALSE	-0.0747142	NA	NA
ENSMUSG00000020182	Ddc	11	11814101	-1	11 A1	NA	prox_11	P	TRUE	FALSE	FALSE	-0.119235	NA	NA
NA	XLOC_011039	11	12037523	1	11	NA	misc_11	M	FALSE	NA	FALSE	NA	NA	NA
NA	Tsci2	11	12151320	1	11	NA	misc_11	M	FALSE	NA	FALSE	NA	NA	NA
ENSMUSG00000051650	B3gnt2	11	22759738	-1	11 A3.2	NA	prox_11	M	TRUE	FALSE	FALSE	0.0590765	NA	NA
ENSMUSG00000051355	Commd1	11	22896136	-1	11 A3	NA	prox_11	isoform-specific	TRUE	FALSE	FALSE	-0.100145	NA	NA
ENSMUSG00000020399	Havcr2	11	46454935	1	NA	NA	misc_11	M	FALSE	NA	FALSE	NA	NA	NA
ENSMUSG00000035112	Wnk4	11	101260567	1	11 D	NA	misc_11	M	TRUE	FALSE	FALSE	-0.130138	NA	NA
ENSMUSG00000039963	Ccdc40	11	119228572	1	11 E2	NA	misc_11	P	TRUE	TRUE	FALSE	0.154081	NA	NA
ENSMUSG00000066632	Pgk1-rs7	12	10898986	-1	NA	NA	misc_12	M	FALSE	NA	FALSE	NA	NA	NA
ENSMUSG00000112546	Gm6992	12	31018218	1	NA	NA	misc_12	P	FALSE	NA	FALSE	NA	NA	NA
NA	Tsci4	12	81007809	-1	12	NA	misc_12	P	FALSE	NA	FALSE	NA	NA	NA
ENSMUSG00000047415	Gpr68	12	100876682	-1	12 F1	NA	dist_12	M	FALSE	NA	FALSE	NA	NA	NA
ENSMUSG00000040867	Begain	12	109032187	-1	12 F1	NA	dist_12	P	FALSE	NA	FALSE	NA	NA	NA
ENSMUSG00000112977	Gm34081	12	109493529	-1	12	NA	dist_12	M	FALSE	NA	FALSE	NA	NA	NA
ENSMUSG00000065526	Mir337	12	109585789	1	12 F1	NA	dist_12	M	FALSE	NA	FALSE	NA	NA	NA
ENSMUSG00000070080	Mir431	12	109590447	1	12 F1	anti-Rtl1	dist_12	M	FALSE	NA	FALSE	NA	NA	NA
ENSMUSG00000070072	Mir433	12	109591715	1	12 F1	anti-Rtl1	dist_12	M	FALSE	NA	FALSE	NA	NA	NA
ENSMUSG00000070076	Mir127	12	109592846	1	12 F1	anti-Rtl1	dist_12	M	FALSE	NA	FALSE	NA	NA	NA
ENSMUSG00000070133	Mir434	12	109594506	1	12 F1	anti-Rtl1	dist_12	M	FALSE	NA	FALSE	NA	NA	NA
ENSMUSG00000087855	Mir432	12	109594956	1	12 F1	anti-Rtl1	dist_12	M	FALSE	NA	FALSE	NA	NA	NA
ENSMUSG00000104858	Mir136	12	109595327	1	12 F1	anti-Rtl1	dist_12	M	FALSE	NA	FALSE	NA	NA	NA
ENSMUSG00000065433	Mir370	12	109618258	1	12 F1	Rian	dist_12	M	FALSE	NA	FALSE	NA	NA	NA
ENSMUSG00000088294	AF357425	12	109636012	1	12 F1	Rian	dist_12	M	FALSE	NA	FALSE	NA	NA	NA
NA	AF357426	12	109642838	1	12 F1	Rian	dist_12	M	FALSE	NA	FALSE	NA	NA	NA
NA	AF357359	12	109650709	1	12 F1	Rian	dist_12	M	FALSE	NA	FALSE	NA	NA	NA
ENSMUSG00000064621	Gm26922	12	109654627	1	12 F1	Rian	dist_12	M	FALSE	NA	FALSE	NA	NA	NA
ENSMUSG00000065749	AF357428	12	109679945	1	12 F1	Rian	dist_12	M	FALSE	NA	FALSE	NA	NA	NA
ENSMUSG00000065022	AF357341	12	109681519	1	12 F1	Rian	dist_12	M	FALSE	NA	FALSE	NA	NA	NA
ENSMUSG00000065477	Mir411	12	109710175	1	12 F1	Mirg	dist_12	M	FALSE	NA	FALSE	NA	NA	NA
ENSMUSG00000104582	Mir380	12	109711803	1	12 F1	Mirg	dist_12	M	FALSE	NA	FALSE	NA	NA	NA
ENSMUSG00000105853	Mir376b	12	109723458	1	12 F1	Mirg	dist_12	M	FALSE	NA	FALSE	NA	NA	NA
ENSMUSG00000065426	Mir134	12	109734139	1	12 F1	Mirg	dist_12	M	FALSE	NA	FALSE	NA	NA	NA
ENSMUSG00000065448	Mir154	12	109738433	1	12 F1	Mirg	dist_12	M	FALSE	NA	FALSE	NA	NA	NA
ENSMUSG00000065497	Mir410	12	109743715	1	12 F1	Mirg	dist_12	M	FALSE	NA	FALSE	NA	NA	NA
ENSMUSG00000104213	Ighd	12	113406604	-1	NA	NA	dist_12	M	FALSE	NA	FALSE	NA	NA	NA
NA	DLK1 downstream transcripts	12	NA	NA	12 F1	NA	NA	P	FALSE	NA	FALSE	NA	NA	NA
NA	Mico1	12	NA	NA	12 F1	NA	NA	M	FALSE	NA	FALSE	NA	NA	NA
NA	Mico1os	12	NA	NA	12 F1	NA	NA	M	FALSE	NA	FALSE	NA	NA	NA
NA	anti-Rtl1	12	NA	NA	12 F1	anti-Rtl1	dist_12	M	FALSE	NA	FALSE	NA	NA	NA
ENSMUSG00000053101	Gpr141	13	19749682	-1	NA	NA	misc_13	M	FALSE	NA	FALSE	NA	NA	NA
ENSMUSG00000018259	Prl8a2	13	27345673	1	NA	NA	cent_13	M	TRUE	TRUE	FALSE	-0.127406	NA	NA
ENSMUSG00000044231	Nhlrc1	13	47012557	-1	13 A5	NA	cent_13	P	TRUE	TRUE	FALSE	0.364496	NA	NA
ENSMUSG00000047842	Diras2	13	52504380	-1	NA	NA	cent_13	M	TRUE	FALSE	FALSE	-0.166887	NA	NA
ENSMUSG00000046082	Tmem174	13	98634978	-1	13 D1	NA	dist_13	P	FALSE	NA	FALSE	NA	NA	NA
ENSMUSG00000021699	Pde4d	13	108449948	1	13 D2	NA	dist_13	P	TRUE	FALSE	FALSE	0.0645282	NA	NA
ENSMUSG00000021848	Otx2	14	48657677	-1	14 C1	NA	prox_14	P	FALSE	NA	FALSE	NA	NA	NA
ENSMUSG00000098682	Otx2os1	14	48668708	1	14 C1	NA	prox_14	P	FALSE	NA	FALSE	NA	NA	NA
ENSMUSG00000040314	Ctsg	14	56099881	-1	NA	NA	prox_14	M	FALSE	NA	FALSE	NA	NA	NA
ENSMUSG00000015441	Gzmf	14	56205263	-1	NA	NA	prox_14	M	TRUE	TRUE	FALSE	-0.0625	NA	NA
ENSMUSG00000033470	Cysltr2	14	73025603	-1	NA	NA	cent_14	M	FALSE	NA	FALSE	NA	NA	NA
ENSMUSG00000034997	Htr2a	14	74640840	1	14 D2	NA	cent_14	M	FALSE	NA	FALSE	NA	NA	NA
ENSMUSG00000061517	Sox21	14	118233232	-1	14 E4	NA	misc_14	P	TRUE	FALSE	FALSE	-0.0901499	NA	NA
ENSMUSG00000036760	Kcnk9	15	72501089	-1	15 D3	NA	cent_15	M	FALSE	NA	FALSE	NA	NA	NA
ENSMUSG00000116295	Gm32885	15	97157029	-1	15	NA	misc_15	P	FALSE	NA	FALSE	NA	NA	NA
ENSMUSG00000037280	Galnt6	15	100691813	-1	15 F1	NA	misc_15	P	TRUE	FALSE	FALSE	0.115668	NA	NA
ENSMUSG00000022657	Cd96	16	46035657	-1	NA	NA	cent_16	M	FALSE	NA	FALSE	NA	NA	NA
ENSMUSG00000022651	Retnlg	16	48872621	1	NA	NA	cent_16	M	FALSE	NA	FALSE	NA	NA	NA
NA	XLOC_037414	17	4983739	-1	17	NA	prox_17	M	FALSE	NA	FALSE	NA	NA	NA
ENSMUSG00000023873	1700010I14Rik	17	8988333	1	17 A1	NA	prox_17	M	FALSE	NA	FALSE	NA	NA	NA
ENSMUSG00000037196	Pacrg	17	10403012	-1	17 A1	NA	prox_17	M	FALSE	NA	FALSE	NA	NA	NA
NA	XLOC_037615	17	12356364	-1	17	NA	prox_17	M	FALSE	NA	FALSE	NA	NA	NA
ENSMUSG00000040966	Slc22a2	17	12584132	1	17 A1	NA	prox_17	M	FALSE	NA	FALSE	NA	NA	NA
ENSMUSG00000089769	Gm16574	17	12818793	1	NA	NA	prox_17	P	FALSE	NA	FALSE	NA	NA	NA
ENSMUSG00000067049	Unc93a	17	13108617	-1	NA	NA	prox_17	M	FALSE	NA	FALSE	NA	NA	NA
NA	CrossFirre	17	NA	NA	X A5	NA	NA	M	FALSE	NA	FALSE	NA	NA	NA
ENSMUSG00000043458	Pcdhb12	18	37435621	1	18 B3	NA	misc_18	M	FALSE	NA	FALSE	NA	NA	NA
ENSMUSG00000024673	Ms4a1	19	11249675	-1	NA	NA	misc_19	M	FALSE	NA	FALSE	NA	NA	NA
ENSMUSG00000052387	Trpm3	19	22139119	1	NA	NA	misc_19	M	FALSE	NA	FALSE	NA	NA	NA
ENSMUSG00000089679	Gm16299	19	53819354	-1	19 D2	NA	cent_19	P	FALSE	NA	FALSE	NA	NA	NA
ENSMUSG00000095180	Rhox5	X	37804842	1	X A3.3	NA	cent_X	M	FALSE	NA	FALSE	NA	NA	NA
ENSMUSG00000073125	Xlr3b	X	73192207	1	X A7	NA	dist_X	M	FALSE	NA	FALSE	NA	NA	NA
ENSMUSG00000067768	Xlr4b	X	73214333	1	X A7	NA	dist_X	M	FALSE	NA	FALSE	NA	NA	NA
ENSMUSG00000031362	Xlr4c	X	73233688	-1	X A7	NA	dist_X	M	FALSE	NA	FALSE	NA	NA	NA
ENSMUSG00000085715	Tsix	X	103431517	1	X D	NA	dist_X	P	FALSE	NA	FALSE	NA	NA	NA
ENSMUSG00000086503	Xist	X	103460366	-1	X D	NA	dist_X	P	FALSE	NA	FALSE	NA	NA	NA
ENSMUSG00000097571	Jpx	X	103493556	1	X D	NA	dist_X	P	FALSE	NA	FALSE	NA	NA	NA
ENSMUSG00000086370	Ftx	X	103560907	-1	X D	NA	dist_X	M	FALSE	NA	FALSE	NA	NA	NA
ENSMUSG00000031330	Zcchc13	X	103630586	1	X D	NA	dist_X	M	FALSE	NA	FALSE	NA	NA	NA

## Sheet: E14.5_matzyg_zygvswt
Supplementary file 1f. Differential imprinted expression in male E14.5 B6(CastB6) placentae, Smchd1 zygΔ vs wt. A gene is called differentiallly imprinted if the multiple-testing corrected p-value is below 0.05 and the absolute difference in silent allele proportion greater than 0.05
ensembl_gene_id	gene	chromosome_name	start_position	strand	location	locus	cluster	expressed_allele	expressed	imprinted	sufficient_counts	zyg_minus_wt	padj	diff_imprinted
ENSMUSG00000061186	Sfmbt2	2	10370510	1	2 A1	NA	prox_2	P	TRUE	TRUE	TRUE	0.294372	0	TRUE
ENSMUSG00000033585	Ndn	7	62346569	1	7 C-B5	NA	cent_7	P	TRUE	TRUE	TRUE	0.44584	0	TRUE
ENSMUSG00000056972	Magel2	7	62377010	1	7 C-B5	NA	cent_7	P	TRUE	TRUE	TRUE	0.458032	0	TRUE
ENSMUSG00000023828	Slc22a3	17	12418960	-1	17 A1	NA	prox_17	M	TRUE	TRUE	TRUE	0.313363	0	TRUE
ENSMUSG00000023868	Pde10a	17	8525372	1	17A1	NA	prox_17	M	TRUE	TRUE	TRUE	0.202556	3.09903e-10	TRUE
ENSMUSG00000070526	Peg12	7	62461871	-1	7 C-B5	NA	cent_7	P	TRUE	TRUE	TRUE	0.39622	1.67229e-08	TRUE
ENSMUSG00000029096	Htra3	5	35652023	-1	5 B3	NA	prox_5	M	TRUE	TRUE	TRUE	0.294544	7.01463e-06	TRUE
ENSMUSG00000022464	Slc38a4	15	96994820	-1	15 F1	NA	misc_15	P	TRUE	TRUE	TRUE	0.128302	1.38003e-05	TRUE
ENSMUSG00000044068	Zrsr1	11	22972005	1	11 A3	NA	prox_11	P	TRUE	TRUE	TRUE	0.143517	8.33037e-05	TRUE
ENSMUSG00000085860	2410003L11Rik	11	97598511	1	11 D	NA	misc_11	P	TRUE	TRUE	TRUE	0.135481	0.000279767	TRUE
ENSMUSG00000086748	Gm13261	2	10339283	-1	NA	NA	prox_2	P	TRUE	TRUE	TRUE	0.243142	0.000294127	TRUE
ENSMUSG00000097639	Platr4	3	41484024	-1	3 B	NA	cent_3	P	TRUE	TRUE	TRUE	0.248006	0.0014665	TRUE
ENSMUSG00000028339	Col15a1	4	47208161	1	NA	NA	misc_4	M	TRUE	TRUE	TRUE	0.26347	0.0220856	TRUE
ENSMUSG00000032454	Rbp2	9	98486115	1	9 E3.3	NA	dist_9	P	TRUE	TRUE	TRUE	-0.179866	0.0220856	TRUE
ENSMUSG00000070527	Mkrn3	7	62417593	-1	7 C-B5	NA	cent_7	P	TRUE	TRUE	TRUE	0.190967	0.0252199	TRUE
ENSMUSG00000025764	Jade1	3	41555731	1	3 B	NA	cent_3	P	TRUE	TRUE	TRUE	0.108562	0.0364759	TRUE
ENSMUSG00000032359	Ctsh	9	90054152	1	9 E3.1	NA	dist_9	P	TRUE	TRUE	TRUE	-0.0525118	0.0447586	TRUE
ENSMUSG00000044231	Nhlrc1	13	47012557	-1	13 A5	NA	cent_13	P	TRUE	TRUE	TRUE	0.416865	0.0447586	TRUE
ENSMUSG00000031714	Gab1	8	80764438	-1	8 C2	NA	misc_8	P	TRUE	TRUE	TRUE	0.0749593	0.0501551	FALSE
ENSMUSG00000043439	Epop	11	97627389	-1	NA	NA	misc_11	P	TRUE	TRUE	TRUE	0.07483	0.0517425	FALSE
ENSMUSG00000021136	Smoc1	12	81026808	1	12 D1	NA	misc_12	P	TRUE	TRUE	TRUE	0.0852159	0.0561049	FALSE
ENSMUSG00000029304	Spp1	5	104435118	1	NA	NA	misc_5	M	TRUE	TRUE	TRUE	0.0765852	0.0575834	FALSE
ENSMUSG00000023885	Thbs2	17	14665500	-1	17 A2	NA	prox_17	M	TRUE	TRUE	TRUE	0.0858496	0.086414	FALSE
ENSMUSG00000000290	Itgb2	10	77530252	1	NA	NA	mid_10	M	TRUE	TRUE	TRUE	0.171723	0.0983406	FALSE
ENSMUSG00000069729	Arid1b	17	4994332	1	17 A1	NA	prox_17	M	TRUE	TRUE	TRUE	0.0787944	0.103718	FALSE
ENSMUSG00000027523	Gnas	2	174284320	1	2 H4	Gnas	dist_2	M	TRUE	TRUE	TRUE	-0.114311	0.186339	FALSE
ENSMUSG00000075707	Dio3	12	110279068	1	12 F1	NA	dist_12	P	TRUE	TRUE	TRUE	0.101431	0.203668	FALSE
ENSMUSG00000016458	Wt1	2	105126529	1	2 E2-E3	NA	prox_2	M	TRUE	TRUE	TRUE	0.09999	0.223555	FALSE
ENSMUSG00000024423	Impact	18	12955852	1	18 A2-B2	NA	cent_18	P	TRUE	TRUE	TRUE	0.0598093	0.246648	FALSE
ENSMUSG00000039963	Ccdc40	11	119228572	1	11 E2	NA	misc_11	P	TRUE	TRUE	TRUE	0.153552	0.38324	FALSE
ENSMUSG00000056071	S100a9	3	90692632	-1	NA	NA	misc_3	M	TRUE	TRUE	TRUE	-0.118182	0.410454	FALSE
ENSMUSG00000097694	G730013B05Rik	16	50526245	1	16 B5	NA	cent_16	P	TRUE	TRUE	TRUE	0.165135	0.410454	FALSE
ENSMUSG00000085925	Rtl1	12	109589193	-1	12 F1	NA	dist_12	P	TRUE	TRUE	TRUE	-0.0195002	0.458016	FALSE
ENSMUSG00000023886	Smoc2	17	14279506	1	17 A2	NA	prox_17	M	TRUE	TRUE	TRUE	0.0246298	0.549661	FALSE
ENSMUSG00000000948	Gm38393	7	59974149	-1	7 C-B5	NA	cent_7	P	TRUE	TRUE	TRUE	-0.0169192	0.581815	FALSE
ENSMUSG00000045942	BC049762	11	51253651	-1	11 B1.3	NA	misc_11	P	TRUE	TRUE	TRUE	-0.125859	0.581815	FALSE
ENSMUSG00000034265	Zdhhc14	17	5492557	1	17A1	NA	prox_17	M	TRUE	TRUE	TRUE	0.0447408	0.581815	FALSE
ENSMUSG00000040013	Fkbp6	5	135291704	-1	5 G2	NA	misc_5	P	TRUE	TRUE	TRUE	-0.0230213	0.654614	FALSE
ENSMUSG00000051527	Usp29	7	6730578	1	7 A2-B1	NA	prox_7	P	TRUE	TRUE	TRUE	0.0256148	0.689578	FALSE
ENSMUSG00000031962	Cdh15	8	122847966	1	8 E1	NA	misc_8	isoform-specific	TRUE	TRUE	TRUE	-0.0357557	0.732381	FALSE
ENSMUSG00000024610	Cd74	18	60803848	1	NA	NA	misc_18	M	TRUE	TRUE	TRUE	0.0394607	0.733983	FALSE
ENSMUSG00000008999	Bmp7	2	172868012	-1	2 H3	NA	dist_2	P	TRUE	TRUE	TRUE	-0.123004	0.742453	FALSE
ENSMUSG00000079186	Gzmc	14	56231441	-1	NA	NA	prox_14	M	TRUE	TRUE	TRUE	0.00397351	0.742453	FALSE
ENSMUSG00000028581	Laptm5	4	130913125	1	NA	NA	misc_4	M	TRUE	TRUE	TRUE	0.0539302	0.780262	FALSE
ENSMUSG00000027520	Zdbf2	1	63273265	1	1 C2	GPR1	cent_1	P	TRUE	TRUE	TRUE	-0.018106	0.815686	FALSE
ENSMUSG00000081833	Gm13669	2	75808358	1	NA	NA	prox_2	M	TRUE	TRUE	TRUE	-0.0210688	0.815686	FALSE
ENSMUSG00000032827	Ppp1r9a	6	4902917	1	6 A1	NA	prox_6	M	TRUE	TRUE	TRUE	0.0151202	0.815686	FALSE
ENSMUSG00000029775	Klhdc10	6	30401868	1	6 A3	NA	prox_6	M	TRUE	TRUE	TRUE	-0.0198361	0.815686	FALSE
ENSMUSG00000051855	Mest	6	30723547	1	6 A3	NA	prox_6	isoform-specific	TRUE	TRUE	TRUE	0.0033848	0.815686	FALSE
ENSMUSG00000002266	Zim1	7	6671269	-1	7 A2-B1	NA	prox_7	M	TRUE	TRUE	TRUE	0.00542057	0.815686	FALSE
ENSMUSG00000102252	Snrpn	7	59982495	-1	7 C-B5	SNURF-SNRPN	cent_7	P	TRUE	TRUE	TRUE	0.00561937	0.815686	FALSE
ENSMUSG00000019814	Ltv1	10	13178140	-1	NA	NA	cent_10	M	TRUE	TRUE	TRUE	0.0173584	0.815686	FALSE
ENSMUSG00000086646	Platr20	11	51189833	-1	11 B1.3	NA	misc_11	P	TRUE	TRUE	TRUE	-0.0534458	0.815686	FALSE
ENSMUSG00000040856	Dlk1	12	109452823	1	12 F1	NA	dist_12	P	TRUE	TRUE	TRUE	-0.00658774	0.815686	FALSE
ENSMUSG00000021268	Meg3	12	109541001	1	12 F1	NA	dist_12	M	TRUE	TRUE	TRUE	0.00319004	0.815686	FALSE
ENSMUSG00000097451	Rian	12	109603940	1	12 F1	NA	dist_12	M	TRUE	TRUE	TRUE	0.00410119	0.815686	FALSE
ENSMUSG00000059256	Gzmd	14	56129556	-1	NA	NA	prox_14	M	TRUE	TRUE	TRUE	0.0131981	0.815686	FALSE
ENSMUSG00000106847	Peg13	15	72805600	-1	15 D3	NA	cent_15	P	TRUE	TRUE	TRUE	-0.00129508	0.815686	FALSE
ENSMUSG00000023826	Prkn	17	10840384	1	17 A1	NA	prox_17	M	TRUE	TRUE	TRUE	0.0648886	0.815686	FALSE
ENSMUSG00000036594	H2-Aa	17	34282744	-1	NA	NA	misc_17	M	TRUE	TRUE	TRUE	-0.0601868	0.815686	FALSE
ENSMUSG00000082536	Gm13456	2	40555752	1	NA	NA	prox_2	M	TRUE	TRUE	TRUE	-0.00900394	0.839565	FALSE
ENSMUSG00000089817	Gm7162	17	12819819	-1	NA	NA	prox_17	P	TRUE	TRUE	TRUE	0.0150794	0.872082	FALSE
ENSMUSG00000073209	Klf14	6	30956023	-1	6 A3	NA	prox_6	M	TRUE	TRUE	TRUE	-0.00073192	0.935663	FALSE
ENSMUSG00000020176	Grb10	11	11930508	-1	11 A1	NA	prox_11	isoform-specific	TRUE	TRUE	TRUE	0.0118562	0.955632	FALSE
ENSMUSG00000048826	Dact2	17	14195052	-1	17 A2	NA	prox_17	M	TRUE	TRUE	TRUE	0.0129779	0.978051	FALSE
ENSMUSG00000002265	Peg3	7	6703892	-1	7 A2-B1	NA	prox_7	P	TRUE	TRUE	TRUE	-0.00155389	0.991742	FALSE
ENSMUSG00000022156	Gzme	14	56117626	-1	NA	NA	prox_14	M	TRUE	TRUE	TRUE	0.00229092	0.991742	FALSE
ENSMUSG00000073471	Rsph3a	17	7945614	1	17A1	NA	prox_17	M	TRUE	TRUE	TRUE	0.00816868	0.991742	FALSE
ENSMUSG00000026395	Ptprc	1	138062861	-1	NA	NA	misc_1	M	TRUE	TRUE	TRUE	0.033388	0.997138	FALSE
ENSMUSG00000019188	H13	2	152669461	1	2 H1	NA	dist_2	isoform-specific	TRUE	TRUE	TRUE	-0.00597624	0.997138	FALSE
ENSMUSG00000042814	Mcts2	2	152687035	1	2 H1	NA	dist_2	P	TRUE	TRUE	TRUE	-0.0047924	0.997138	FALSE
ENSMUSG00000027551	Zfp64	2	168893331	-1	2 H3	NA	dist_2	P	TRUE	TRUE	TRUE	0.0144504	0.997138	FALSE
ENSMUSG00000087119	Atg4a-ps	3	103643954	-1	NA	NA	misc_3	M	TRUE	TRUE	TRUE	0	0.997138	FALSE
ENSMUSG00000083219	Gm11410	4	80003989	1	NA	NA	misc_4	M	TRUE	TRUE	TRUE	0	0.997138	FALSE
ENSMUSG00000004631	Sgce	6	4674350	-1	6 A1	NA	prox_6	P	TRUE	TRUE	TRUE	0.00273795	0.997138	FALSE
ENSMUSG00000092035	Peg10	6	4747306	1	6 A1	NA	prox_6	P	TRUE	TRUE	TRUE	-0.00122497	0.997138	FALSE
ENSMUSG00000042607	Asb4	6	5383386	1	6 A1	NA	prox_6	M	TRUE	TRUE	TRUE	0.00663073	0.997138	FALSE
ENSMUSG00000025607	Copg2	6	30747554	-1	6 A3	NA	prox_6	M	TRUE	TRUE	TRUE	0.00516254	0.997138	FALSE
ENSMUSG00000100826	Snhg14	7	59307924	-1	7 C-B5	NA	cent_7	P	TRUE	TRUE	TRUE	-0.00294659	0.997138	FALSE
ENSMUSG00000019817	Plagl1	10	13060504	1	10 A2	NA	cent_10	P	TRUE	TRUE	TRUE	-0.00085631	0.997138	FALSE
ENSMUSG00000062866	Phactr2	10	13207717	-1	10 A1	NA	cent_10	M	TRUE	TRUE	TRUE	0.000532524	0.997138	FALSE
ENSMUSG00000037202	Prf1	10	61297833	1	NA	NA	mid_10	M	TRUE	TRUE	TRUE	0	0.997138	FALSE
ENSMUSG00000097391	Mirg	12	109729764	1	12 F1	Mirg	dist_12	M	TRUE	TRUE	TRUE	-0.00224955	0.997138	FALSE
ENSMUSG00000040284	Gzmg	14	56156582	-1	NA	NA	prox_14	M	TRUE	TRUE	TRUE	0.00253948	0.997138	FALSE
ENSMUSG00000036698	Ago2	15	73095844	-1	15 D3	NA	cent_15	M	TRUE	TRUE	TRUE	-0.00734522	0.997138	FALSE
ENSMUSG00000023861	Mpc1	17	8282904	1	17A1	NA	prox_17	M	TRUE	TRUE	TRUE	0.0053229	0.997138	FALSE
ENSMUSG00000023830	Igf2r	17	12682406	-1	17 A1	NA	prox_17	M	TRUE	TRUE	TRUE	-0.00178554	0.997138	FALSE
ENSMUSG00000078247	Airn	17	12741311	1	17 A1	NA	prox_17	P	TRUE	TRUE	TRUE	0.00606845	0.997138	FALSE
ENSMUSG00000025967	Eef1b2	1	63176825	1	1 C2	GPR1	cent_1	P	TRUE	FALSE	FALSE	0.0136109	NA	FALSE
ENSMUSG00000046856	Gpr1	1	63182691	-1	1 C2	GPR1	cent_1	P	TRUE	FALSE	FALSE	0.0180054	NA	FALSE
ENSMUSG00000025964	Adam23	1	63445891	1	1 C2	GPR1	cent_1	P	TRUE	FALSE	FALSE	0.0264338	NA	FALSE
ENSMUSG00000026470	Stx6	1	155158715	1	1 G3	NA	misc_1	M	TRUE	FALSE	FALSE	-0.00652664	NA	FALSE
ENSMUSG00000033722	BC034090	1	155212471	-1	1 G3	NA	misc_1	M	TRUE	FALSE	FALSE	-0.00406011	NA	FALSE
ENSMUSG00000026970	Rbms1	2	60750193	-1	2 C1.2	NA	prox_2	P	TRUE	FALSE	FALSE	0.0130414	NA	FALSE
ENSMUSG00000042745	Id1	2	152736251	1	2 H1	NA	dist_2	P	TRUE	FALSE	FALSE	0.0259836	NA	FALSE
ENSMUSG00000007659	Bcl2l1	2	152780668	-1	2 H1	NA	dist_2	P	TRUE	FALSE	FALSE	-0.0312519	NA	FALSE
ENSMUSG00000027469	Tpx2	2	152847964	1	2 H1	NA	dist_2	P	TRUE	FALSE	FALSE	0.0286237	NA	FALSE
ENSMUSG00000067787	Blcap	2	157556362	-1	2 H1	NA	dist_2	isoform-specific	TRUE	FALSE	FALSE	0.0181021	NA	FALSE
ENSMUSG00000027522	Stx16	2	174076308	1	2 H4	NA	dist_2	M	TRUE	FALSE	FALSE	0.000227213	NA	FALSE
ENSMUSG00000039263	Npepl1	2	174110349	1	2 H4	NA	dist_2	M	TRUE	FALSE	FALSE	0.0206205	NA	FALSE
ENSMUSG00000037221	Mospd3	5	137596645	-1	5 G2	NA	misc_5	P	TRUE	FALSE	FALSE	-0.0451232	NA	FALSE
ENSMUSG00000029664	Tfpi2	6	3962595	-1	6 A1	NA	prox_6	M	TRUE	FALSE	FALSE	0.0418069	NA	FALSE
ENSMUSG00000015189	Casd1	6	4600839	1	6 A1	NA	prox_6	M	TRUE	FALSE	FALSE	-0.0217898	NA	FALSE
ENSMUSG00000029804	Herc3	6	58831465	1	6 B3	NA	prox_6	isoform-specific	TRUE	FALSE	FALSE	-0.0240188	NA	FALSE
ENSMUSG00000030199	Etv6	6	134035700	1	6 G1	NA	dist_6	P	TRUE	FALSE	FALSE	-0.0201033	NA	FALSE
ENSMUSG00000002602	Axl	7	25757273	-1	7 A3-B1	NA	misc_7	M	TRUE	FALSE	FALSE	-0.0114624	NA	FALSE
ENSMUSG00000025326	Ube3a	7	59228750	1	7 C-B5	NA	cent_7	M	TRUE	FALSE	FALSE	0.036006	NA	FALSE
ENSMUSG00000031665	Sall1	8	89027235	-1	NA	NA	misc_8	P	TRUE	FALSE	FALSE	0.0183912	NA	FALSE
ENSMUSG00000040111	Gramd1b	9	40293233	-1	9 A5.1	NA	misc_9	P	TRUE	FALSE	FALSE	0.0236593	NA	FALSE
ENSMUSG00000032299	Commd4	9	57155035	-1	NA	NA	misc_9	P	TRUE	FALSE	FALSE	-0.0117502	NA	FALSE
ENSMUSG00000032280	Tle3	9	61372366	1	9 B	NA	misc_9	P	TRUE	FALSE	FALSE	0.00879561	NA	FALSE
ENSMUSG00000040204	Pclaf	9	65890237	1	NA	NA	misc_9	P	TRUE	FALSE	FALSE	0.00396105	NA	FALSE
ENSMUSG00000032422	Snx14	9	88376750	-1	9 E3.1	NA	dist_9	P	TRUE	FALSE	FALSE	0.011236	NA	FALSE
ENSMUSG00000019795	Pcmt1	10	7629373	-1	10 A1	NA	misc_10	P	TRUE	FALSE	FALSE	-0.00642849	NA	FALSE
ENSMUSG00000051355	Commd1	11	22896136	-1	11 A3	NA	prox_11	isoform-specific	TRUE	FALSE	FALSE	0.0286149	NA	FALSE
ENSMUSG00000036545	Adamts2	11	50602084	1	11 B1.3	NA	misc_11	P	TRUE	FALSE	FALSE	-0.00266058	NA	FALSE
ENSMUSG00000020634	Ubxn2a	12	4879032	-1	NA	NA	prox_12	P	TRUE	FALSE	FALSE	-0.0299342	NA	FALSE
ENSMUSG00000015143	Actn1	12	80167547	-1	12 C3	NA	misc_12	P	TRUE	FALSE	FALSE	0.00903642	NA	FALSE
ENSMUSG00000021266	Wars	12	108860030	-1	12 F1	NA	dist_12	P	TRUE	FALSE	FALSE	-0.0248417	NA	FALSE
ENSMUSG00000017843	Ppp2r5c	12	110447120	1	12 F1	NA	dist_12	P	TRUE	FALSE	FALSE	-0.0114433	NA	FALSE
ENSMUSG00000018707	Dync1h1	12	110601452	1	12 F1	NA	dist_12	P	TRUE	FALSE	FALSE	0.00525972	NA	FALSE
ENSMUSG00000016477	E2f3	13	29906575	-1	13 A3.2	NA	cent_13	P	TRUE	FALSE	FALSE	-0.0228924	NA	FALSE
ENSMUSG00000041773	Enc1	13	97241105	1	13 D1	NA	dist_13	P	TRUE	FALSE	FALSE	-0.0053961	NA	FALSE
ENSMUSG00000021699	Pde4d	13	108449948	1	13 D2	NA	dist_13	P	TRUE	FALSE	FALSE	-0.00611315	NA	FALSE
ENSMUSG00000061517	Sox21	14	118233232	-1	14 E4	NA	misc_14	P	TRUE	FALSE	FALSE	-0.0137271	NA	FALSE
ENSMUSG00000022139	Mbnl2	14	120275669	1	14 E4	NA	misc_14	P	TRUE	FALSE	FALSE	0.0117061	NA	FALSE
ENSMUSG00000047921	Trappc9	15	72589620	-1	15 D3	NA	cent_15	isoform-specific	TRUE	FALSE	FALSE	-0.0425843	NA	FALSE
ENSMUSG00000000489	Pdgfb	15	79995874	-1	15 E1	NA	cent_15	P	TRUE	FALSE	FALSE	0.00397991	NA	FALSE
ENSMUSG00000023169	Slc38a1	15	96571418	-1	15 F1	NA	misc_15	P	TRUE	FALSE	FALSE	0.00618723	NA	FALSE
ENSMUSG00000022462	Slc38a2	15	96687392	-1	15 F1	NA	misc_15	P	TRUE	FALSE	FALSE	-0.0228755	NA	FALSE
ENSMUSG00000022641	Bbx	16	50191844	-1	16 B5	NA	cent_16	P	TRUE	FALSE	FALSE	0.0135228	NA	FALSE
ENSMUSG00000022639	Dubr	16	50719294	-1	NA	NA	cent_16	P	TRUE	FALSE	FALSE	0.00924493	NA	FALSE
ENSMUSG00000062078	Qk	17	10202601	-1	17 A1	NA	prox_17	M	TRUE	FALSE	FALSE	-0.0127401	NA	FALSE
ENSMUSG00000024140	Epas1	17	86753700	1	17 E4	NA	cent_17	P	TRUE	FALSE	FALSE	-0.00664488	NA	FALSE
ENSMUSG00000044906	4930503L19Rik	18	70452212	-1	NA	NA	misc_18	P	TRUE	FALSE	FALSE	0.00393569	NA	FALSE
ENSMUSG00000048720	Tbc1d12	19	38836579	1	19 C3	NA	cent_19	P	TRUE	FALSE	FALSE	-0.0353391	NA	FALSE
ENSMUSG00000026358	Rgs1	1	144242296	-1	NA	NA	misc_1	M	FALSE	NA	FALSE	NA	NA	NA
ENSMUSG00000026471	Mr1	1	155127277	-1	1 G3	NA	misc_1	M	TRUE	FALSE	FALSE	0.0724445	NA	NA
ENSMUSG00000026581	Sell	1	164061982	1	NA	NA	misc_1	M	FALSE	NA	FALSE	NA	NA	NA
ENSMUSG00000073494	Sh2d1b2	1	170232749	1	NA	NA	misc_1	M	FALSE	NA	FALSE	NA	NA	NA
ENSMUSG00000038421	Fcrla	1	170917576	-1	NA	NA	misc_1	M	FALSE	NA	FALSE	NA	NA	NA
NA	Zdbf2linc	1	NA	NA	1 C2	GPR1	cent_1	P	FALSE	NA	FALSE	NA	NA	NA
NA	XLOC_047844	2	10308628	-1	2	NA	prox_2	P	FALSE	NA	FALSE	NA	NA	NA
ENSMUSG00000026770	Il2ra	2	11642807	1	NA	NA	prox_2	M	FALSE	NA	FALSE	NA	NA	NA
ENSMUSG00000087701	Gm13493	2	51871126	-1	NA	NA	prox_2	M	TRUE	TRUE	FALSE	NaN	NA	NA
ENSMUSG00000040093	Bmf	2	118528757	-1	NA	NA	prox_2	M	TRUE	FALSE	FALSE	0.124079	NA	NA
ENSMUSG00000068129	Cst7	2	150570415	1	NA	NA	dist_2	M	FALSE	NA	FALSE	NA	NA	NA
ENSMUSG00000009876	Cox4i2	2	152754173	1	2 H1	NA	dist_2	P	TRUE	FALSE	FALSE	-0.0951065	NA	NA
ENSMUSG00000067786	Nnat	2	157560078	1	2 H1	NA	dist_2	P	TRUE	TRUE	FALSE	-0.25	NA	NA
ENSMUSG00000074622	Mafb	2	160363703	-1	2 H2	NA	dist_2	M	TRUE	FALSE	FALSE	0.0870441	NA	NA
ENSMUSG00000065521	Mir296	2	174267047	-1	2 H4	Gnas	dist_2	P	FALSE	NA	FALSE	NA	NA	NA
ENSMUSG00000065410	Mir298	2	174267504	-1	2 H4	Gnas	dist_2	P	FALSE	NA	FALSE	NA	NA	NA
ENSMUSG00000086537	Nespas	2	174281237	-1	2 H4	Gnas	dist_2	P	TRUE	TRUE	FALSE	0.158333	NA	NA
ENSMUSG00000027524	Edn3	2	174760619	1	2 H4	Gnas	dist_2	P	FALSE	NA	FALSE	NA	NA	NA
NA	NESP55	2	NA	NA	2 H4	Gnas	dist_2	M	FALSE	NA	FALSE	NA	NA	NA
NA	GNASXL	2	NA	NA	2 H4	Gnas	dist_2	P	FALSE	NA	FALSE	NA	NA	NA
NA	Exon-1A	2	NA	NA	2 H4	Gnas	dist_2	P	FALSE	NA	FALSE	NA	NA	NA
NA	GS-alpha	2	NA	NA	2 H4	Gnas	dist_2	M	FALSE	NA	FALSE	NA	NA	NA
NA	F7	2	NA	NA	2 H4	Gnas	dist_2	M	FALSE	NA	FALSE	NA	NA	NA
ENSMUSG00000001865	Cpa3	3	20215620	-1	NA	NA	misc_3	M	FALSE	NA	FALSE	NA	NA	NA
ENSMUSG00000105260	Gm40040	3	41477577	-1	NA	NA	cent_3	P	TRUE	FALSE	FALSE	0.165778	NA	NA
ENSMUSG00000106223	2400006e01Rik	3	41521247	-1	3 B	NA	cent_3	P	TRUE	TRUE	FALSE	-0.087963	NA	NA
ENSMUSG00000027955	Gask1b	3	79884533	1	3 E3	NA	misc_3	P	TRUE	FALSE	FALSE	-0.0514649	NA	NA
ENSMUSG00000028078	Dclk2	3	86786151	-1	NA	NA	misc_3	M	TRUE	FALSE	FALSE	-0.0568458	NA	NA
ENSMUSG00000028859	Csf3r	4	126024550	1	NA	NA	misc_4	M	TRUE	TRUE	FALSE	0.175155	NA	NA
ENSMUSG00000097287	D130017N08Rik	5	143758354	1	5 G2	NA	misc_5	P	FALSE	NA	FALSE	NA	NA	NA
ENSMUSG00000042817	Flt3	5	147330741	-1	NA	NA	misc_5	P	TRUE	FALSE	FALSE	NA	NA	NA
ENSMUSG00000023964	Calcr	6	3685680	-1	6 A1	NA	prox_6	M	FALSE	NA	FALSE	NA	NA	NA
ENSMUSG00000065501	Mir335	6	30741299	1	6 A3	NA	prox_6	P	FALSE	NA	FALSE	NA	NA	NA
ENSMUSG00000039032	Tsga13	6	30896981	-1	6 A3.3	NA	prox_6	M	FALSE	NA	FALSE	NA	NA	NA
ENSMUSG00000076490	Trbc1	6	41538218	1	NA	NA	prox_6	M	FALSE	NA	FALSE	NA	NA	NA
ENSMUSG00000055430	Nap1l5	6	58905233	-1	6 C1	NA	prox_6	P	FALSE	NA	FALSE	NA	NA	NA
ENSMUSG00000025889	Snca	6	60731575	-1	NA	NA	prox_6	M	TRUE	FALSE	FALSE	-0.058923	NA	NA
ENSMUSG00000030114	Klrg1	6	122270596	-1	NA	NA	dist_6	M	FALSE	NA	FALSE	NA	NA	NA
ENSMUSG00000108090	Gm6637	6	122295664	1	NA	NA	dist_6	M	FALSE	NA	FALSE	NA	NA	NA
NA	Copg2os1	6	NA	NA	6 A3	NA	prox_6	P	FALSE	NA	FALSE	NA	NA	NA
ENSMUSG00000108113	Zim2	7	6651748	-1	7 A2-B1	NA	prox_7	M	FALSE	NA	FALSE	NA	NA	NA
ENSMUSG00000108043	Zim3	7	6955685	-1	7 A2-B1	NA	prox_7	M	FALSE	NA	FALSE	NA	NA	NA
ENSMUSG00000109176	Zfp264	7	6977246	1	7 A2-B1	NA	prox_7	P	FALSE	NA	FALSE	NA	NA	NA
ENSMUSG00000030579	Tyrobp	7	30413760	1	NA	NA	misc_7	M	TRUE	FALSE	FALSE	-0.173057	NA	NA
ENSMUSG00000077191	Snord64	7	59978808	-1	7C-B5	SNURF-SNRPN	cent_7	P	FALSE	NA	FALSE	NA	NA	NA
ENSMUSG00000089375	Snord107	7	59980876	-1	7C-B5	SNURF-SNRPN	cent_7	P	FALSE	NA	FALSE	NA	NA	NA
ENSMUSG00000102627	Snurf	7	59995449	-1	7 C-B5	SNURF-SNRPN	cent_7	P	FALSE	NA	FALSE	NA	NA	NA
NA	XLOC_075991	7	60641818	-1	7	NA	cent_7	P	FALSE	NA	FALSE	NA	NA	NA
ENSMUSG00000109006	B230209E15Rik	7	61529871	-1	7 C-B5	NA	cent_7	P	FALSE	NA	FALSE	NA	NA	NA
ENSMUSG00000109394	A230057D06Rik	7	61704519	-1	7 C-B5	NA	cent_7	P	FALSE	NA	FALSE	NA	NA	NA
ENSMUSG00000109321	A330076H08Rik	7	61930137	-1	7 C-B5	NA	cent_7	P	FALSE	NA	FALSE	NA	NA	NA
ENSMUSG00000045813	Gm9801	7	62094506	-1	7 C-B5	NA	cent_7	P	FALSE	NA	FALSE	NA	NA	NA
ENSMUSG00000030638	Sh3gl3	7	82173840	1	7 D3	NA	misc_7	P	TRUE	FALSE	FALSE	-0.101339	NA	NA
ENSMUSG00000030724	Cd19	7	126408450	-1	NA	NA	distcent_7	M	FALSE	NA	FALSE	NA	NA	NA
ENSMUSG00000030782	Tgfb1i1	7	128246812	1	7 F3	NA	distcent_7	M	TRUE	FALSE	FALSE	NA	NA	NA
ENSMUSG00000030847	Bag3	7	128523616	1	7 F3	NA	distcent_7	M	TRUE	FALSE	FALSE	NA	NA	NA
ENSMUSG00000042105	Inpp5f	7	128611328	1	7 F3	NA	distcent_7	P	TRUE	FALSE	FALSE	NA	NA	NA
ENSMUSG00000045777	Ifitm10	7	142325837	-1	7 F5	NA	dist_7	M	TRUE	FALSE	FALSE	NA	NA	NA
ENSMUSG00000018819	Lsp1	7	142460809	1	7 F5	NA	dist_7	M	TRUE	FALSE	FALSE	NA	NA	NA
ENSMUSG00000087090	Nctc1	7	142544609	-1	7 F5	NA	dist_7	P	FALSE	NA	FALSE	NA	NA	NA
ENSMUSG00000000031	H19	7	142575529	-1	7 F5	NA	dist_7	M	TRUE	TRUE	FALSE	NA	NA	NA
ENSMUSG00000048583	Igf2	7	142650766	-1	7 F5	NA	dist_7	P	TRUE	TRUE	FALSE	NA	NA	NA
ENSMUSG00000086266	Igf2os	7	142659693	1	7 F5	NA	dist_7	P	TRUE	TRUE	FALSE	NA	NA	NA
ENSMUSG00000000215	Ins2	7	142678656	-1	7 F5	NA	dist_7	P	FALSE	NA	FALSE	NA	NA	NA
ENSMUSG00000000214	Th	7	142892752	-1	7 F5	NA	dist_7	M	TRUE	FALSE	FALSE	NA	NA	NA
ENSMUSG00000009248	Ascl2	7	142966829	-1	7 F5	NA	dist_7	M	TRUE	TRUE	FALSE	NA	NA	NA
ENSMUSG00000059277	R74862	7	143021784	-1	7 F5	NA	dist_7	M	FALSE	NA	FALSE	NA	NA	NA
ENSMUSG00000037706	Cd81	7	143052739	1	7 F5	NA	dist_7	M	TRUE	FALSE	FALSE	NA	NA	NA
ENSMUSG00000045752	Tssc4	7	143069249	1	7 F5	NA	dist_7	M	TRUE	TRUE	FALSE	NA	NA	NA
ENSMUSG00000009545	Kcnq1	7	143106362	1	7 F5	NA	dist_7	M	TRUE	TRUE	FALSE	NA	NA	NA
ENSMUSG00000101609	Kcnq1ot1	7	143203458	-1	7 F5	NA	dist_7	P	TRUE	TRUE	FALSE	NA	NA	NA
ENSMUSG00000037664	Cdkn1c	7	143458339	-1	7 F5	NA	dist_7	M	TRUE	TRUE	FALSE	NA	NA	NA
NA	AF313042	7	143462528	NA	7 F5	NA	dist_7	M	FALSE	NA	FALSE	NA	NA	NA
ENSMUSG00000000154	Slc22a18	7	143473736	1	7 F5	NA	dist_7	M	TRUE	TRUE	FALSE	NA	NA	NA
ENSMUSG00000010760	Phlda2	7	143501545	-1	7 F5	NA	dist_7	M	TRUE	TRUE	FALSE	NA	NA	NA
ENSMUSG00000059119	Nap1l4	7	143513579	-1	7 F5	NA	dist_7	M	TRUE	FALSE	FALSE	NA	NA	NA
ENSMUSG00000045362	Tnfrsf26	7	143607659	-1	7 F5	NA	dist_7	M	TRUE	TRUE	FALSE	NA	NA	NA
ENSMUSG00000109251	E230032D23Rik	7	143628024	1	7	NA	dist_7	M	FALSE	NA	FALSE	NA	NA	NA
ENSMUSG00000010751	Tnfrsf22	7	143634806	-1	7 F5	NA	dist_7	M	TRUE	TRUE	FALSE	NA	NA	NA
ENSMUSG00000037613	Tnfrsf23	7	143665809	-1	7 F5	NA	dist_7	M	TRUE	TRUE	FALSE	NA	NA	NA
ENSMUSG00000037606	Osbpl5	7	143688762	-1	7 F5	NA	dist_7	M	TRUE	TRUE	FALSE	NA	NA	NA
ENSMUSG00000031075	Ano1	7	144588549	-1	7 F5	NA	dist_7	M	TRUE	TRUE	FALSE	NA	NA	NA
NA	Peg3os	7	NA	NA	7 A1	NA	prox_7	P	FALSE	NA	FALSE	NA	NA	NA
NA	Mkrn3os	7	NA	NA	7C-B5	NA	cent_7	P	FALSE	NA	FALSE	NA	NA	NA
NA	BM117114	7	NA	NA	7C-B5	NA	cent_7	P	FALSE	NA	FALSE	NA	NA	NA
NA	Pec2	7	NA	NA	7C-B5	NA	cent_7	P	FALSE	NA	FALSE	NA	NA	NA
NA	BB077283	7	NA	NA	7C-B5	NA	cent_7	P	FALSE	NA	FALSE	NA	NA	NA
NA	Pec3	7	NA	NA	7C-B5	NA	cent_7	P	FALSE	NA	FALSE	NA	NA	NA
NA	Snord116_cluster	7	NA	NA	7C-B5	pwcr1	cent_7	P	FALSE	NA	FALSE	NA	NA	NA
NA	Snord115_cluster	7	NA	NA	7C-B5	pwcr1	cent_7	P	FALSE	NA	FALSE	NA	NA	NA
NA	U80893	7	NA	NA	7C-B5	NA	cent_7	P	FALSE	NA	FALSE	NA	NA	NA
NA	PIHit	7	NA	NA	7 F5	NA	dist_7	P	FALSE	NA	FALSE	NA	NA	NA
NA	Tsci1	8	80859408	1	8	NA	misc_8	P	FALSE	NA	FALSE	NA	NA	NA
ENSMUSG00000032094	Cd3d	9	44981786	1	NA	NA	misc_9	M	FALSE	NA	FALSE	NA	NA	NA
ENSMUSG00000065596	Mir184	9	89802260	-1	9 E3.1	NA	dist_9	P	FALSE	NA	FALSE	NA	NA	NA
ENSMUSG00000098627	4930524O08Rik	9	89826519	1	9 E3.1	NA	dist_9	P	FALSE	NA	FALSE	NA	NA	NA
ENSMUSG00000032356	Rasgrf1	9	89909908	1	9 E3.1	NA	dist_9	P	TRUE	TRUE	FALSE	0.0544502	NA	NA
NA	AS4	9	NA	1	9 E3.1	NA	dist_9	P	FALSE	NA	FALSE	NA	NA	NA
ENSMUSG00000025383	Il23a	10	128296139	-1	NA	NA	dist_10	M	FALSE	NA	FALSE	NA	NA	NA
ENSMUSG00000025348	Itga7	10	128933818	1	NA	NA	dist_10	M	TRUE	FALSE	FALSE	0.0520127	NA	NA
ENSMUSG00000020182	Ddc	11	11814101	-1	11 A1	NA	prox_11	P	TRUE	FALSE	FALSE	-0.119235	NA	NA
NA	XLOC_011039	11	12037523	1	11	NA	misc_11	M	FALSE	NA	FALSE	NA	NA	NA
NA	Tsci2	11	12151320	1	11	NA	misc_11	M	FALSE	NA	FALSE	NA	NA	NA
ENSMUSG00000020173	Cobl	11	12236608	-1	11 A1	NA	prox_11	M	TRUE	FALSE	FALSE	-0.0992112	NA	NA
ENSMUSG00000051650	B3gnt2	11	22759738	-1	11 A3.2	NA	prox_11	M	TRUE	FALSE	FALSE	0.0937971	NA	NA
ENSMUSG00000020399	Havcr2	11	46454935	1	NA	NA	misc_11	M	FALSE	NA	FALSE	NA	NA	NA
ENSMUSG00000061469	Gm12569	11	51220473	1	11 B1.3	NA	misc_11	P	TRUE	FALSE	FALSE	-0.129775	NA	NA
ENSMUSG00000035112	Wnk4	11	101260567	1	11 D	NA	misc_11	M	TRUE	FALSE	FALSE	-0.0561646	NA	NA
ENSMUSG00000066632	Pgk1-rs7	12	10898986	-1	NA	NA	misc_12	M	FALSE	NA	FALSE	NA	NA	NA
ENSMUSG00000112546	Gm6992	12	31018218	1	NA	NA	misc_12	P	FALSE	NA	FALSE	NA	NA	NA
NA	Tsci4	12	81007809	-1	12	NA	misc_12	P	FALSE	NA	FALSE	NA	NA	NA
ENSMUSG00000047415	Gpr68	12	100876682	-1	12 F1	NA	dist_12	M	FALSE	NA	FALSE	NA	NA	NA
ENSMUSG00000040867	Begain	12	109032187	-1	12 F1	NA	dist_12	P	FALSE	NA	FALSE	NA	NA	NA
ENSMUSG00000112977	Gm34081	12	109493529	-1	12	NA	dist_12	M	FALSE	NA	FALSE	NA	NA	NA
ENSMUSG00000065526	Mir337	12	109585789	1	12 F1	NA	dist_12	M	FALSE	NA	FALSE	NA	NA	NA
ENSMUSG00000070080	Mir431	12	109590447	1	12 F1	anti-Rtl1	dist_12	M	FALSE	NA	FALSE	NA	NA	NA
ENSMUSG00000070072	Mir433	12	109591715	1	12 F1	anti-Rtl1	dist_12	M	FALSE	NA	FALSE	NA	NA	NA
ENSMUSG00000070076	Mir127	12	109592846	1	12 F1	anti-Rtl1	dist_12	M	FALSE	NA	FALSE	NA	NA	NA
ENSMUSG00000070133	Mir434	12	109594506	1	12 F1	anti-Rtl1	dist_12	M	FALSE	NA	FALSE	NA	NA	NA
ENSMUSG00000087855	Mir432	12	109594956	1	12 F1	anti-Rtl1	dist_12	M	FALSE	NA	FALSE	NA	NA	NA
ENSMUSG00000104858	Mir136	12	109595327	1	12 F1	anti-Rtl1	dist_12	M	FALSE	NA	FALSE	NA	NA	NA
ENSMUSG00000065433	Mir370	12	109618258	1	12 F1	Rian	dist_12	M	FALSE	NA	FALSE	NA	NA	NA
ENSMUSG00000088294	AF357425	12	109636012	1	12 F1	Rian	dist_12	M	FALSE	NA	FALSE	NA	NA	NA
NA	AF357426	12	109642838	1	12 F1	Rian	dist_12	M	FALSE	NA	FALSE	NA	NA	NA
NA	AF357359	12	109650709	1	12 F1	Rian	dist_12	M	FALSE	NA	FALSE	NA	NA	NA
ENSMUSG00000064621	Gm26922	12	109654627	1	12 F1	Rian	dist_12	M	FALSE	NA	FALSE	NA	NA	NA
ENSMUSG00000065749	AF357428	12	109679945	1	12 F1	Rian	dist_12	M	FALSE	NA	FALSE	NA	NA	NA
ENSMUSG00000065022	AF357341	12	109681519	1	12 F1	Rian	dist_12	M	FALSE	NA	FALSE	NA	NA	NA
ENSMUSG00000065477	Mir411	12	109710175	1	12 F1	Mirg	dist_12	M	FALSE	NA	FALSE	NA	NA	NA
ENSMUSG00000104582	Mir380	12	109711803	1	12 F1	Mirg	dist_12	M	FALSE	NA	FALSE	NA	NA	NA
ENSMUSG00000105853	Mir376b	12	109723458	1	12 F1	Mirg	dist_12	M	FALSE	NA	FALSE	NA	NA	NA
ENSMUSG00000065426	Mir134	12	109734139	1	12 F1	Mirg	dist_12	M	FALSE	NA	FALSE	NA	NA	NA
ENSMUSG00000065448	Mir154	12	109738433	1	12 F1	Mirg	dist_12	M	FALSE	NA	FALSE	NA	NA	NA
ENSMUSG00000065497	Mir410	12	109743715	1	12 F1	Mirg	dist_12	M	FALSE	NA	FALSE	NA	NA	NA
ENSMUSG00000104213	Ighd	12	113406604	-1	NA	NA	dist_12	M	FALSE	NA	FALSE	NA	NA	NA
NA	DLK1 downstream transcripts	12	NA	NA	12 F1	NA	NA	P	FALSE	NA	FALSE	NA	NA	NA
NA	Mico1	12	NA	NA	12 F1	NA	NA	M	FALSE	NA	FALSE	NA	NA	NA
NA	Mico1os	12	NA	NA	12 F1	NA	NA	M	FALSE	NA	FALSE	NA	NA	NA
NA	anti-Rtl1	12	NA	NA	12 F1	anti-Rtl1	dist_12	M	FALSE	NA	FALSE	NA	NA	NA
ENSMUSG00000053101	Gpr141	13	19749682	-1	NA	NA	misc_13	M	FALSE	NA	FALSE	NA	NA	NA
ENSMUSG00000018259	Prl8a2	13	27345673	1	NA	NA	cent_13	M	TRUE	TRUE	FALSE	-0.120202	NA	NA
ENSMUSG00000047842	Diras2	13	52504380	-1	NA	NA	cent_13	M	TRUE	FALSE	FALSE	-0.0552433	NA	NA
ENSMUSG00000046082	Tmem174	13	98634978	-1	13 D1	NA	dist_13	P	FALSE	NA	FALSE	NA	NA	NA
ENSMUSG00000021848	Otx2	14	48657677	-1	14 C1	NA	prox_14	P	FALSE	NA	FALSE	NA	NA	NA
ENSMUSG00000098682	Otx2os1	14	48668708	1	14 C1	NA	prox_14	P	FALSE	NA	FALSE	NA	NA	NA
ENSMUSG00000040314	Ctsg	14	56099881	-1	NA	NA	prox_14	M	FALSE	NA	FALSE	NA	NA	NA
ENSMUSG00000015441	Gzmf	14	56205263	-1	NA	NA	prox_14	M	TRUE	TRUE	FALSE	-0.0625	NA	NA
ENSMUSG00000033470	Cysltr2	14	73025603	-1	NA	NA	cent_14	M	FALSE	NA	FALSE	NA	NA	NA
ENSMUSG00000034997	Htr2a	14	74640840	1	14 D2	NA	cent_14	M	FALSE	NA	FALSE	NA	NA	NA
ENSMUSG00000036760	Kcnk9	15	72501089	-1	15 D3	NA	cent_15	M	FALSE	NA	FALSE	NA	NA	NA
ENSMUSG00000068391	Chrac1	15	73090392	1	15 D3	NA	cent_15	M	TRUE	FALSE	FALSE	-0.0906682	NA	NA
ENSMUSG00000116295	Gm32885	15	97157029	-1	15	NA	misc_15	P	FALSE	NA	FALSE	NA	NA	NA
ENSMUSG00000037280	Galnt6	15	100691813	-1	15 F1	NA	misc_15	P	TRUE	FALSE	FALSE	-0.0888892	NA	NA
ENSMUSG00000022657	Cd96	16	46035657	-1	NA	NA	cent_16	M	FALSE	NA	FALSE	NA	NA	NA
ENSMUSG00000022651	Retnlg	16	48872621	1	NA	NA	cent_16	M	FALSE	NA	FALSE	NA	NA	NA
ENSMUSG00000022952	Runx1	16	92601466	-1	16 C4	NA	misc_16	P	TRUE	FALSE	FALSE	0.212185	NA	NA
NA	XLOC_037414	17	4983739	-1	17	NA	prox_17	M	FALSE	NA	FALSE	NA	NA	NA
ENSMUSG00000023873	1700010I14Rik	17	8988333	1	17 A1	NA	prox_17	M	FALSE	NA	FALSE	NA	NA	NA
ENSMUSG00000037196	Pacrg	17	10403012	-1	17 A1	NA	prox_17	M	FALSE	NA	FALSE	NA	NA	NA
NA	XLOC_037615	17	12356364	-1	17	NA	prox_17	M	FALSE	NA	FALSE	NA	NA	NA
ENSMUSG00000040966	Slc22a2	17	12584132	1	17 A1	NA	prox_17	M	FALSE	NA	FALSE	NA	NA	NA
ENSMUSG00000089769	Gm16574	17	12818793	1	NA	NA	prox_17	P	FALSE	NA	FALSE	NA	NA	NA
ENSMUSG00000073460	Pnldc1	17	12888902	-1	NA	NA	prox_17	M	TRUE	TRUE	FALSE	0.174165	NA	NA
ENSMUSG00000067049	Unc93a	17	13108617	-1	NA	NA	prox_17	M	FALSE	NA	FALSE	NA	NA	NA
NA	CrossFirre	17	NA	NA	X A5	NA	NA	M	FALSE	NA	FALSE	NA	NA	NA
ENSMUSG00000043458	Pcdhb12	18	37435621	1	18 B3	NA	misc_18	M	FALSE	NA	FALSE	NA	NA	NA
ENSMUSG00000075010	AW112010	19	11047617	-1	NA	NA	misc_19	M	TRUE	TRUE	FALSE	NA	NA	NA
ENSMUSG00000024673	Ms4a1	19	11249675	-1	NA	NA	misc_19	M	FALSE	NA	FALSE	NA	NA	NA
ENSMUSG00000052387	Trpm3	19	22139119	1	NA	NA	misc_19	M	FALSE	NA	FALSE	NA	NA	NA
ENSMUSG00000089679	Gm16299	19	53819354	-1	19 D2	NA	cent_19	P	FALSE	NA	FALSE	NA	NA	NA
ENSMUSG00000095180	Rhox5	X	37804842	1	X A3.3	NA	cent_X	M	FALSE	NA	FALSE	NA	NA	NA
ENSMUSG00000073125	Xlr3b	X	73192207	1	X A7	NA	dist_X	M	FALSE	NA	FALSE	NA	NA	NA
ENSMUSG00000067768	Xlr4b	X	73214333	1	X A7	NA	dist_X	M	FALSE	NA	FALSE	NA	NA	NA
ENSMUSG00000031362	Xlr4c	X	73233688	-1	X A7	NA	dist_X	M	FALSE	NA	FALSE	NA	NA	NA
ENSMUSG00000085715	Tsix	X	103431517	1	X D	NA	dist_X	P	FALSE	NA	FALSE	NA	NA	NA
ENSMUSG00000086503	Xist	X	103460366	-1	X D	NA	dist_X	P	FALSE	NA	FALSE	NA	NA	NA
ENSMUSG00000097571	Jpx	X	103493556	1	X D	NA	dist_X	P	FALSE	NA	FALSE	NA	NA	NA
ENSMUSG00000086370	Ftx	X	103560907	-1	X D	NA	dist_X	M	FALSE	NA	FALSE	NA	NA	NA
ENSMUSG00000031330	Zcchc13	X	103630586	1	X D	NA	dist_X	M	FALSE	NA	FALSE	NA	NA	NA

## Sheet: E14.5_matzyg_matzygvswt
Supplementary file 1g. Differential imprinted expression in male E14.5 B6(CastB6) placentae, Smchd1 matzygΔ vs wt. A gene is called differentiallly imprinted if the multiple-testing corrected p-value is below 0.05 and the absolute difference in silent allele proportion greater than 0.05
ensembl_gene_id	gene	chromosome_name	start_position	strand	location	locus	cluster	expressed_allele	expressed	imprinted	sufficient_counts	zygoo_minus_wt	padj	diff_imprinted
ENSMUSG00000061186	Sfmbt2	2	10370510	1	2 A1	NA	prox_2	P	TRUE	TRUE	TRUE	0.222923	0	TRUE
ENSMUSG00000056972	Magel2	7	62377010	1	7 C-B5	NA	cent_7	P	TRUE	TRUE	TRUE	0.44633	0	TRUE
ENSMUSG00000009248	Ascl2	7	142966829	-1	7 F5	NA	dist_7	M	TRUE	TRUE	TRUE	0.241252	9.3933e-10	TRUE
ENSMUSG00000033585	Ndn	7	62346569	1	7 C-B5	NA	cent_7	P	TRUE	TRUE	TRUE	0.350979	1.17603e-09	TRUE
ENSMUSG00000085860	2410003L11Rik	11	97598511	1	11 D	NA	misc_11	P	TRUE	TRUE	TRUE	0.284319	1.17603e-09	TRUE
ENSMUSG00000045752	Tssc4	7	143069249	1	7 F5	NA	dist_7	M	TRUE	TRUE	TRUE	0.271796	2.37065e-06	TRUE
ENSMUSG00000022464	Slc38a4	15	96994820	-1	15 F1	NA	misc_15	P	TRUE	TRUE	TRUE	0.0981535	0.00017588	TRUE
ENSMUSG00000025764	Jade1	3	41555731	1	3 B	NA	cent_3	P	TRUE	TRUE	TRUE	0.137801	0.00129393	TRUE
ENSMUSG00000070526	Peg12	7	62461871	-1	7 C-B5	NA	cent_7	P	TRUE	TRUE	TRUE	0.235506	0.00143307	TRUE
ENSMUSG00000043439	Epop	11	97627389	-1	NA	NA	misc_11	P	TRUE	TRUE	TRUE	0.108616	0.00226357	TRUE
ENSMUSG00000097639	Platr4	3	41484024	-1	3 B	NA	cent_3	P	TRUE	TRUE	TRUE	0.212645	0.00414108	TRUE
ENSMUSG00000086748	Gm13261	2	10339283	-1	NA	NA	prox_2	P	TRUE	TRUE	TRUE	0.172811	0.0109454	TRUE
ENSMUSG00000010760	Phlda2	7	143501545	-1	7 F5	NA	dist_7	M	TRUE	TRUE	TRUE	0.171329	0.0217639	TRUE
ENSMUSG00000037664	Cdkn1c	7	143458339	-1	7 F5	NA	dist_7	M	TRUE	TRUE	TRUE	0.0381761	0.00129393	FALSE
ENSMUSG00000082536	Gm13456	2	40555752	1	NA	NA	prox_2	M	TRUE	TRUE	TRUE	0.0185952	0.091044	FALSE
ENSMUSG00000039963	Ccdc40	11	119228572	1	11 E2	NA	misc_11	P	TRUE	TRUE	TRUE	0.245748	0.120898	FALSE
ENSMUSG00000070527	Mkrn3	7	62417593	-1	7 C-B5	NA	cent_7	P	TRUE	TRUE	TRUE	0.196981	0.143486	FALSE
ENSMUSG00000000290	Itgb2	10	77530252	1	NA	NA	mid_10	M	TRUE	TRUE	TRUE	0.175667	0.17634	FALSE
ENSMUSG00000097391	Mirg	12	109729764	1	12 F1	Mirg	dist_12	M	TRUE	TRUE	TRUE	0.04547	0.268387	FALSE
ENSMUSG00000044231	Nhlrc1	13	47012557	-1	13 A5	NA	cent_13	P	TRUE	TRUE	TRUE	0.24069	0.302351	FALSE
ENSMUSG00000042607	Asb4	6	5383386	1	6 A1	NA	prox_6	M	TRUE	TRUE	TRUE	0.0531677	0.378792	FALSE
ENSMUSG00000021268	Meg3	12	109541001	1	12 F1	NA	dist_12	M	TRUE	TRUE	TRUE	0.0126577	0.378792	FALSE
ENSMUSG00000037613	Tnfrsf23	7	143665809	-1	7 F5	NA	dist_7	M	TRUE	TRUE	TRUE	0.0598724	0.38579	FALSE
ENSMUSG00000045362	Tnfrsf26	7	143607659	-1	7 F5	NA	dist_7	M	TRUE	TRUE	TRUE	0.137774	0.530502	FALSE
ENSMUSG00000097694	G730013B05Rik	16	50526245	1	16 B5	NA	cent_16	P	TRUE	TRUE	TRUE	0.160713	0.530502	FALSE
ENSMUSG00000056071	S100a9	3	90692632	-1	NA	NA	misc_3	M	TRUE	TRUE	TRUE	-0.0601035	0.593141	FALSE
ENSMUSG00000028339	Col15a1	4	47208161	1	NA	NA	misc_4	M	TRUE	TRUE	TRUE	0.0704575	0.593141	FALSE
ENSMUSG00000086266	Igf2os	7	142659693	1	7 F5	NA	dist_7	P	TRUE	TRUE	TRUE	0.014801	0.593141	FALSE
ENSMUSG00000045942	BC049762	11	51253651	-1	11 B1.3	NA	misc_11	P	TRUE	TRUE	TRUE	-0.128482	0.593141	FALSE
ENSMUSG00000083219	Gm11410	4	80003989	1	NA	NA	misc_4	M	TRUE	TRUE	TRUE	0.017652	0.637883	FALSE
ENSMUSG00000051527	Usp29	7	6730578	1	7 A2-B1	NA	prox_7	P	TRUE	TRUE	TRUE	0.0197551	0.65136	FALSE
ENSMUSG00000000154	Slc22a18	7	143473736	1	7 F5	NA	dist_7	M	TRUE	TRUE	TRUE	0.0459289	0.65136	FALSE
ENSMUSG00000097451	Rian	12	109603940	1	12 F1	NA	dist_12	M	TRUE	TRUE	TRUE	0.0104241	0.65136	FALSE
ENSMUSG00000075707	Dio3	12	110279068	1	12 F1	NA	dist_12	P	TRUE	TRUE	TRUE	0.111209	0.65136	FALSE
ENSMUSG00000031962	Cdh15	8	122847966	1	8 E1	NA	misc_8	isoform-specific	TRUE	TRUE	TRUE	-0.0357557	0.667957	FALSE
ENSMUSG00000086646	Platr20	11	51189833	-1	11 B1.3	NA	misc_11	P	TRUE	TRUE	TRUE	0.0587462	0.737284	FALSE
ENSMUSG00000016458	Wt1	2	105126529	1	2 E2-E3	NA	prox_2	M	TRUE	TRUE	TRUE	-0.0874814	0.743358	FALSE
ENSMUSG00000029096	Htra3	5	35652023	-1	5 B3	NA	prox_5	M	TRUE	TRUE	TRUE	0.130335	0.743358	FALSE
ENSMUSG00000009545	Kcnq1	7	143106362	1	7 F5	NA	dist_7	M	TRUE	TRUE	TRUE	0.0606824	0.743358	FALSE
ENSMUSG00000042814	Mcts2	2	152687035	1	2 H1	NA	dist_2	P	TRUE	TRUE	TRUE	0.0213934	0.799496	FALSE
ENSMUSG00000000031	H19	7	142575529	-1	7 F5	NA	dist_7	M	TRUE	TRUE	TRUE	0.011227	0.799496	FALSE
ENSMUSG00000101609	Kcnq1ot1	7	143203458	-1	7 F5	NA	dist_7	P	TRUE	TRUE	TRUE	0.00723847	0.856701	FALSE
ENSMUSG00000081833	Gm13669	2	75808358	1	NA	NA	prox_2	M	TRUE	TRUE	TRUE	0.027065	0.864378	FALSE
ENSMUSG00000027523	Gnas	2	174284320	1	2 H4	Gnas	dist_2	M	TRUE	TRUE	TRUE	-0.078735	0.864378	FALSE
ENSMUSG00000051855	Mest	6	30723547	1	6 A3	NA	prox_6	isoform-specific	TRUE	TRUE	TRUE	0.00212786	0.864378	FALSE
ENSMUSG00000002265	Peg3	7	6703892	-1	7 A2-B1	NA	prox_7	P	TRUE	TRUE	TRUE	-0.00659417	0.864378	FALSE
ENSMUSG00000037606	Osbpl5	7	143688762	-1	7 F5	NA	dist_7	M	TRUE	TRUE	TRUE	0.0554467	0.864378	FALSE
ENSMUSG00000019817	Plagl1	10	13060504	1	10 A2	NA	cent_10	P	TRUE	TRUE	TRUE	0.00778948	0.864378	FALSE
ENSMUSG00000019814	Ltv1	10	13178140	-1	NA	NA	cent_10	M	TRUE	TRUE	TRUE	-0.0236018	0.864378	FALSE
ENSMUSG00000040284	Gzmg	14	56156582	-1	NA	NA	prox_14	M	TRUE	TRUE	TRUE	0.00657988	0.864378	FALSE
ENSMUSG00000024423	Impact	18	12955852	1	18 A2-B2	NA	cent_18	P	TRUE	TRUE	TRUE	0.0241128	0.864378	FALSE
ENSMUSG00000024610	Cd74	18	60803848	1	NA	NA	misc_18	M	TRUE	TRUE	TRUE	0.00230008	0.864378	FALSE
ENSMUSG00000008999	Bmp7	2	172868012	-1	2 H3	NA	dist_2	P	TRUE	TRUE	TRUE	0.0938724	0.887508	FALSE
ENSMUSG00000092035	Peg10	6	4747306	1	6 A1	NA	prox_6	P	TRUE	TRUE	TRUE	0.00174967	0.887508	FALSE
ENSMUSG00000100826	Snhg14	7	59307924	-1	7 C-B5	NA	cent_7	P	TRUE	TRUE	TRUE	0.000922788	0.887508	FALSE
ENSMUSG00000010751	Tnfrsf22	7	143634806	-1	7 F5	NA	dist_7	M	TRUE	TRUE	TRUE	-0.0826206	0.887508	FALSE
ENSMUSG00000031075	Ano1	7	144588549	-1	7 F5	NA	dist_7	M	TRUE	TRUE	TRUE	0.0320922	0.887508	FALSE
ENSMUSG00000031714	Gab1	8	80764438	-1	8 C2	NA	misc_8	P	TRUE	TRUE	TRUE	0.0238326	0.887508	FALSE
ENSMUSG00000022156	Gzme	14	56117626	-1	NA	NA	prox_14	M	TRUE	TRUE	TRUE	0.0101054	0.887508	FALSE
ENSMUSG00000106847	Peg13	15	72805600	-1	15 D3	NA	cent_15	P	TRUE	TRUE	TRUE	-0.0152419	0.887508	FALSE
ENSMUSG00000027551	Zfp64	2	168893331	-1	2 H3	NA	dist_2	P	TRUE	TRUE	TRUE	-0.0208947	0.896017	FALSE
ENSMUSG00000040013	Fkbp6	5	135291704	-1	5 G2	NA	misc_5	P	TRUE	TRUE	TRUE	-0.0052655	0.896017	FALSE
ENSMUSG00000085925	Rtl1	12	109589193	-1	12 F1	NA	dist_12	P	TRUE	TRUE	TRUE	-0.00755567	0.896017	FALSE
ENSMUSG00000020176	Grb10	11	11930508	-1	11 A1	NA	prox_11	isoform-specific	TRUE	TRUE	TRUE	-0.0130541	0.901513	FALSE
ENSMUSG00000032359	Ctsh	9	90054152	1	9 E3.1	NA	dist_9	P	TRUE	TRUE	TRUE	0.0252671	0.903791	FALSE
ENSMUSG00000029304	Spp1	5	104435118	1	NA	NA	misc_5	M	TRUE	TRUE	TRUE	0.0427165	0.94847	FALSE
ENSMUSG00000025607	Copg2	6	30747554	-1	6 A3	NA	prox_6	M	TRUE	TRUE	TRUE	0.0148721	0.94847	FALSE
ENSMUSG00000048583	Igf2	7	142650766	-1	7 F5	NA	dist_7	P	TRUE	TRUE	TRUE	0.00181111	0.94847	FALSE
ENSMUSG00000059256	Gzmd	14	56129556	-1	NA	NA	prox_14	M	TRUE	TRUE	TRUE	-0.00354519	0.94847	FALSE
ENSMUSG00000027520	Zdbf2	1	63273265	1	1 C2	GPR1	cent_1	P	TRUE	TRUE	TRUE	0.0102058	0.964721	FALSE
ENSMUSG00000019188	H13	2	152669461	1	2 H1	NA	dist_2	isoform-specific	TRUE	TRUE	TRUE	-0.00975865	0.964721	FALSE
ENSMUSG00000021136	Smoc1	12	81026808	1	12 D1	NA	misc_12	P	TRUE	TRUE	TRUE	-0.0121135	0.964721	FALSE
ENSMUSG00000036698	Ago2	15	73095844	-1	15 D3	NA	cent_15	M	TRUE	TRUE	TRUE	0.013468	0.967687	FALSE
ENSMUSG00000044068	Zrsr1	11	22972005	1	11 A3	NA	prox_11	P	TRUE	TRUE	TRUE	0.000353173	0.968962	FALSE
ENSMUSG00000026395	Ptprc	1	138062861	-1	NA	NA	misc_1	M	TRUE	TRUE	TRUE	0.0215301	0.980584	FALSE
ENSMUSG00000087119	Atg4a-ps	3	103643954	-1	NA	NA	misc_3	M	TRUE	TRUE	TRUE	0	0.980584	FALSE
ENSMUSG00000028581	Laptm5	4	130913125	1	NA	NA	misc_4	M	TRUE	TRUE	TRUE	0.0197777	0.980584	FALSE
ENSMUSG00000004631	Sgce	6	4674350	-1	6 A1	NA	prox_6	P	TRUE	TRUE	TRUE	-0.000875619	0.980584	FALSE
ENSMUSG00000032827	Ppp1r9a	6	4902917	1	6 A1	NA	prox_6	M	TRUE	TRUE	TRUE	0.00224315	0.980584	FALSE
ENSMUSG00000029775	Klhdc10	6	30401868	1	6 A3	NA	prox_6	M	TRUE	TRUE	TRUE	-0.00026255	0.980584	FALSE
ENSMUSG00000073209	Klf14	6	30956023	-1	6 A3	NA	prox_6	M	TRUE	TRUE	TRUE	-0.0035225	0.980584	FALSE
ENSMUSG00000002266	Zim1	7	6671269	-1	7 A2-B1	NA	prox_7	M	TRUE	TRUE	TRUE	3.01346e-05	0.980584	FALSE
ENSMUSG00000000948	Gm38393	7	59974149	-1	7 C-B5	NA	cent_7	P	TRUE	TRUE	TRUE	0.0164141	0.980584	FALSE
ENSMUSG00000102252	Snrpn	7	59982495	-1	7 C-B5	SNURF-SNRPN	cent_7	P	TRUE	TRUE	TRUE	0.000373771	0.980584	FALSE
ENSMUSG00000062866	Phactr2	10	13207717	-1	10 A1	NA	cent_10	M	TRUE	TRUE	TRUE	0.00509971	0.980584	FALSE
ENSMUSG00000037202	Prf1	10	61297833	1	NA	NA	mid_10	M	TRUE	TRUE	TRUE	0	0.980584	FALSE
ENSMUSG00000040856	Dlk1	12	109452823	1	12 F1	NA	dist_12	P	TRUE	TRUE	TRUE	0.000638905	0.980584	FALSE
ENSMUSG00000079186	Gzmc	14	56231441	-1	NA	NA	prox_14	M	TRUE	TRUE	TRUE	0	0.980584	FALSE
ENSMUSG00000025967	Eef1b2	1	63176825	1	1 C2	GPR1	cent_1	P	TRUE	FALSE	FALSE	0.00900554	NA	FALSE
ENSMUSG00000046856	Gpr1	1	63182691	-1	1 C2	GPR1	cent_1	P	TRUE	FALSE	FALSE	0.0418875	NA	FALSE
ENSMUSG00000026470	Stx6	1	155158715	1	1 G3	NA	misc_1	M	TRUE	FALSE	FALSE	0.00845219	NA	FALSE
ENSMUSG00000033722	BC034090	1	155212471	-1	1 G3	NA	misc_1	M	TRUE	FALSE	FALSE	-0.0136362	NA	FALSE
ENSMUSG00000026970	Rbms1	2	60750193	-1	2 C1.2	NA	prox_2	P	TRUE	FALSE	FALSE	0.0033215	NA	FALSE
ENSMUSG00000040093	Bmf	2	118528757	-1	NA	NA	prox_2	M	TRUE	FALSE	FALSE	0.0216941	NA	FALSE
ENSMUSG00000042745	Id1	2	152736251	1	2 H1	NA	dist_2	P	TRUE	FALSE	FALSE	-0.0282236	NA	FALSE
ENSMUSG00000007659	Bcl2l1	2	152780668	-1	2 H1	NA	dist_2	P	TRUE	FALSE	FALSE	0.00693497	NA	FALSE
ENSMUSG00000027469	Tpx2	2	152847964	1	2 H1	NA	dist_2	P	TRUE	FALSE	FALSE	-0.0427203	NA	FALSE
ENSMUSG00000067787	Blcap	2	157556362	-1	2 H1	NA	dist_2	isoform-specific	TRUE	FALSE	FALSE	0.0155924	NA	FALSE
ENSMUSG00000027522	Stx16	2	174076308	1	2 H4	NA	dist_2	M	TRUE	FALSE	FALSE	-0.0403466	NA	FALSE
ENSMUSG00000039263	Npepl1	2	174110349	1	2 H4	NA	dist_2	M	TRUE	FALSE	FALSE	0.0252502	NA	FALSE
ENSMUSG00000037221	Mospd3	5	137596645	-1	5 G2	NA	misc_5	P	TRUE	FALSE	FALSE	0.0409848	NA	FALSE
ENSMUSG00000015189	Casd1	6	4600839	1	6 A1	NA	prox_6	M	TRUE	FALSE	FALSE	-0.00890092	NA	FALSE
ENSMUSG00000029804	Herc3	6	58831465	1	6 B3	NA	prox_6	isoform-specific	TRUE	FALSE	FALSE	-0.0189678	NA	FALSE
ENSMUSG00000025889	Snca	6	60731575	-1	NA	NA	prox_6	M	TRUE	FALSE	FALSE	-0.018445	NA	FALSE
ENSMUSG00000030199	Etv6	6	134035700	1	6 G1	NA	dist_6	P	TRUE	FALSE	FALSE	0.00655861	NA	FALSE
ENSMUSG00000002602	Axl	7	25757273	-1	7 A3-B1	NA	misc_7	M	TRUE	FALSE	FALSE	-0.00299416	NA	FALSE
ENSMUSG00000025326	Ube3a	7	59228750	1	7 C-B5	NA	cent_7	M	TRUE	FALSE	FALSE	0.00568898	NA	FALSE
ENSMUSG00000030847	Bag3	7	128523616	1	7 F3	NA	distcent_7	M	TRUE	FALSE	FALSE	0.00092558	NA	FALSE
ENSMUSG00000042105	Inpp5f	7	128611328	1	7 F3	NA	distcent_7	P	TRUE	FALSE	FALSE	-0.0066075	NA	FALSE
ENSMUSG00000045777	Ifitm10	7	142325837	-1	7 F5	NA	dist_7	M	TRUE	FALSE	FALSE	-0.0406263	NA	FALSE
ENSMUSG00000018819	Lsp1	7	142460809	1	7 F5	NA	dist_7	M	TRUE	FALSE	FALSE	-0.00350823	NA	FALSE
ENSMUSG00000037706	Cd81	7	143052739	1	7 F5	NA	dist_7	M	TRUE	FALSE	FALSE	0.0180441	NA	FALSE
ENSMUSG00000059119	Nap1l4	7	143513579	-1	7 F5	NA	dist_7	M	TRUE	FALSE	FALSE	-0.00639394	NA	FALSE
ENSMUSG00000031665	Sall1	8	89027235	-1	NA	NA	misc_8	P	TRUE	FALSE	FALSE	0.00959401	NA	FALSE
ENSMUSG00000032422	Snx14	9	88376750	-1	9 E3.1	NA	dist_9	P	TRUE	FALSE	FALSE	0.0112314	NA	FALSE
ENSMUSG00000019795	Pcmt1	10	7629373	-1	10 A1	NA	misc_10	P	TRUE	FALSE	FALSE	0.0161453	NA	FALSE
ENSMUSG00000025348	Itga7	10	128933818	1	NA	NA	dist_10	M	TRUE	FALSE	FALSE	0.0195875	NA	FALSE
ENSMUSG00000020173	Cobl	11	12236608	-1	11 A1	NA	prox_11	M	TRUE	FALSE	FALSE	0.0455027	NA	FALSE
ENSMUSG00000051650	B3gnt2	11	22759738	-1	11 A3.2	NA	prox_11	M	TRUE	FALSE	FALSE	0.00293471	NA	FALSE
ENSMUSG00000051355	Commd1	11	22896136	-1	11 A3	NA	prox_11	isoform-specific	TRUE	FALSE	FALSE	-0.00904679	NA	FALSE
ENSMUSG00000061469	Gm12569	11	51220473	1	11 B1.3	NA	misc_11	P	TRUE	FALSE	FALSE	0.0422428	NA	FALSE
ENSMUSG00000020634	Ubxn2a	12	4879032	-1	NA	NA	prox_12	P	TRUE	FALSE	FALSE	-0.00959377	NA	FALSE
ENSMUSG00000015143	Actn1	12	80167547	-1	12 C3	NA	misc_12	P	TRUE	FALSE	FALSE	0.00259493	NA	FALSE
ENSMUSG00000021266	Wars	12	108860030	-1	12 F1	NA	dist_12	P	TRUE	FALSE	FALSE	-0.00858529	NA	FALSE
ENSMUSG00000017843	Ppp2r5c	12	110447120	1	12 F1	NA	dist_12	P	TRUE	FALSE	FALSE	-0.00325195	NA	FALSE
ENSMUSG00000018707	Dync1h1	12	110601452	1	12 F1	NA	dist_12	P	TRUE	FALSE	FALSE	0.00547981	NA	FALSE
ENSMUSG00000016477	E2f3	13	29906575	-1	13 A3.2	NA	cent_13	P	TRUE	FALSE	FALSE	-0.0229131	NA	FALSE
ENSMUSG00000041773	Enc1	13	97241105	1	13 D1	NA	dist_13	P	TRUE	FALSE	FALSE	-0.0232446	NA	FALSE
ENSMUSG00000021699	Pde4d	13	108449948	1	13 D2	NA	dist_13	P	TRUE	FALSE	FALSE	-0.020614	NA	FALSE
ENSMUSG00000022139	Mbnl2	14	120275669	1	14 E4	NA	misc_14	P	TRUE	FALSE	FALSE	0.0161445	NA	FALSE
ENSMUSG00000047921	Trappc9	15	72589620	-1	15 D3	NA	cent_15	isoform-specific	TRUE	FALSE	FALSE	0.0483861	NA	FALSE
ENSMUSG00000000489	Pdgfb	15	79995874	-1	15 E1	NA	cent_15	P	TRUE	FALSE	FALSE	0.0495065	NA	FALSE
ENSMUSG00000023169	Slc38a1	15	96571418	-1	15 F1	NA	misc_15	P	TRUE	FALSE	FALSE	0.0144195	NA	FALSE
ENSMUSG00000022462	Slc38a2	15	96687392	-1	15 F1	NA	misc_15	P	TRUE	FALSE	FALSE	-0.00151192	NA	FALSE
ENSMUSG00000022641	Bbx	16	50191844	-1	16 B5	NA	cent_16	P	TRUE	FALSE	FALSE	0.00562346	NA	FALSE
ENSMUSG00000022639	Dubr	16	50719294	-1	NA	NA	cent_16	P	TRUE	FALSE	FALSE	-0.00423509	NA	FALSE
ENSMUSG00000024140	Epas1	17	86753700	1	17 E4	NA	cent_17	P	TRUE	FALSE	FALSE	0.0458047	NA	FALSE
ENSMUSG00000044906	4930503L19Rik	18	70452212	-1	NA	NA	misc_18	P	TRUE	FALSE	FALSE	-0.0157262	NA	FALSE
ENSMUSG00000025964	Adam23	1	63445891	1	1 C2	GPR1	cent_1	P	TRUE	FALSE	FALSE	0.0707259	NA	NA
ENSMUSG00000026358	Rgs1	1	144242296	-1	NA	NA	misc_1	M	FALSE	NA	FALSE	NA	NA	NA
ENSMUSG00000026471	Mr1	1	155127277	-1	1 G3	NA	misc_1	M	TRUE	FALSE	FALSE	0.056068	NA	NA
ENSMUSG00000026581	Sell	1	164061982	1	NA	NA	misc_1	M	FALSE	NA	FALSE	NA	NA	NA
ENSMUSG00000073494	Sh2d1b2	1	170232749	1	NA	NA	misc_1	M	FALSE	NA	FALSE	NA	NA	NA
ENSMUSG00000038421	Fcrla	1	170917576	-1	NA	NA	misc_1	M	FALSE	NA	FALSE	NA	NA	NA
NA	Zdbf2linc	1	NA	NA	1 C2	GPR1	cent_1	P	FALSE	NA	FALSE	NA	NA	NA
NA	XLOC_047844	2	10308628	-1	2	NA	prox_2	P	FALSE	NA	FALSE	NA	NA	NA
ENSMUSG00000026770	Il2ra	2	11642807	1	NA	NA	prox_2	M	FALSE	NA	FALSE	NA	NA	NA
ENSMUSG00000087701	Gm13493	2	51871126	-1	NA	NA	prox_2	M	TRUE	TRUE	FALSE	-1	NA	NA
ENSMUSG00000068129	Cst7	2	150570415	1	NA	NA	dist_2	M	FALSE	NA	FALSE	NA	NA	NA
ENSMUSG00000009876	Cox4i2	2	152754173	1	2 H1	NA	dist_2	P	TRUE	FALSE	FALSE	-0.0880706	NA	NA
ENSMUSG00000067786	Nnat	2	157560078	1	2 H1	NA	dist_2	P	TRUE	TRUE	FALSE	-0.25	NA	NA
ENSMUSG00000074622	Mafb	2	160363703	-1	2 H2	NA	dist_2	M	TRUE	FALSE	FALSE	-0.192134	NA	NA
ENSMUSG00000065521	Mir296	2	174267047	-1	2 H4	Gnas	dist_2	P	FALSE	NA	FALSE	NA	NA	NA
ENSMUSG00000065410	Mir298	2	174267504	-1	2 H4	Gnas	dist_2	P	FALSE	NA	FALSE	NA	NA	NA
ENSMUSG00000086537	Nespas	2	174281237	-1	2 H4	Gnas	dist_2	P	TRUE	TRUE	FALSE	-0.216667	NA	NA
ENSMUSG00000027524	Edn3	2	174760619	1	2 H4	Gnas	dist_2	P	FALSE	NA	FALSE	NA	NA	NA
NA	NESP55	2	NA	NA	2 H4	Gnas	dist_2	M	FALSE	NA	FALSE	NA	NA	NA
NA	GNASXL	2	NA	NA	2 H4	Gnas	dist_2	P	FALSE	NA	FALSE	NA	NA	NA
NA	Exon-1A	2	NA	NA	2 H4	Gnas	dist_2	P	FALSE	NA	FALSE	NA	NA	NA
NA	GS-alpha	2	NA	NA	2 H4	Gnas	dist_2	M	FALSE	NA	FALSE	NA	NA	NA
NA	F7	2	NA	NA	2 H4	Gnas	dist_2	M	FALSE	NA	FALSE	NA	NA	NA
ENSMUSG00000001865	Cpa3	3	20215620	-1	NA	NA	misc_3	M	FALSE	NA	FALSE	NA	NA	NA
ENSMUSG00000105260	Gm40040	3	41477577	-1	NA	NA	cent_3	P	TRUE	FALSE	FALSE	0.137433	NA	NA
ENSMUSG00000106223	2400006e01Rik	3	41521247	-1	3 B	NA	cent_3	P	TRUE	TRUE	FALSE	-0.148117	NA	NA
ENSMUSG00000027955	Gask1b	3	79884533	1	3 E3	NA	misc_3	P	TRUE	FALSE	FALSE	-0.113484	NA	NA
ENSMUSG00000028078	Dclk2	3	86786151	-1	NA	NA	misc_3	M	TRUE	FALSE	FALSE	-0.0702359	NA	NA
ENSMUSG00000028859	Csf3r	4	126024550	1	NA	NA	misc_4	M	TRUE	TRUE	FALSE	0.0604621	NA	NA
ENSMUSG00000097287	D130017N08Rik	5	143758354	1	5 G2	NA	misc_5	P	FALSE	NA	FALSE	NA	NA	NA
ENSMUSG00000042817	Flt3	5	147330741	-1	NA	NA	misc_5	P	TRUE	FALSE	FALSE	-0.0763645	NA	NA
ENSMUSG00000023964	Calcr	6	3685680	-1	6 A1	NA	prox_6	M	FALSE	NA	FALSE	NA	NA	NA
ENSMUSG00000029664	Tfpi2	6	3962595	-1	6 A1	NA	prox_6	M	TRUE	FALSE	FALSE	-0.0786339	NA	NA
ENSMUSG00000065501	Mir335	6	30741299	1	6 A3	NA	prox_6	P	FALSE	NA	FALSE	NA	NA	NA
ENSMUSG00000039032	Tsga13	6	30896981	-1	6 A3.3	NA	prox_6	M	FALSE	NA	FALSE	NA	NA	NA
ENSMUSG00000076490	Trbc1	6	41538218	1	NA	NA	prox_6	M	FALSE	NA	FALSE	NA	NA	NA
ENSMUSG00000055430	Nap1l5	6	58905233	-1	6 C1	NA	prox_6	P	FALSE	NA	FALSE	NA	NA	NA
ENSMUSG00000030114	Klrg1	6	122270596	-1	NA	NA	dist_6	M	FALSE	NA	FALSE	NA	NA	NA
ENSMUSG00000108090	Gm6637	6	122295664	1	NA	NA	dist_6	M	FALSE	NA	FALSE	NA	NA	NA
NA	Copg2os1	6	NA	NA	6 A3	NA	prox_6	P	FALSE	NA	FALSE	NA	NA	NA
ENSMUSG00000108113	Zim2	7	6651748	-1	7 A2-B1	NA	prox_7	M	FALSE	NA	FALSE	NA	NA	NA
ENSMUSG00000108043	Zim3	7	6955685	-1	7 A2-B1	NA	prox_7	M	FALSE	NA	FALSE	NA	NA	NA
ENSMUSG00000109176	Zfp264	7	6977246	1	7 A2-B1	NA	prox_7	P	FALSE	NA	FALSE	NA	NA	NA
ENSMUSG00000030579	Tyrobp	7	30413760	1	NA	NA	misc_7	M	TRUE	FALSE	FALSE	-0.208931	NA	NA
ENSMUSG00000077191	Snord64	7	59978808	-1	7C-B5	SNURF-SNRPN	cent_7	P	FALSE	NA	FALSE	NA	NA	NA
ENSMUSG00000089375	Snord107	7	59980876	-1	7C-B5	SNURF-SNRPN	cent_7	P	FALSE	NA	FALSE	NA	NA	NA
ENSMUSG00000102627	Snurf	7	59995449	-1	7 C-B5	SNURF-SNRPN	cent_7	P	FALSE	NA	FALSE	NA	NA	NA
NA	XLOC_075991	7	60641818	-1	7	NA	cent_7	P	FALSE	NA	FALSE	NA	NA	NA
ENSMUSG00000109006	B230209E15Rik	7	61529871	-1	7 C-B5	NA	cent_7	P	FALSE	NA	FALSE	NA	NA	NA
ENSMUSG00000109394	A230057D06Rik	7	61704519	-1	7 C-B5	NA	cent_7	P	FALSE	NA	FALSE	NA	NA	NA
ENSMUSG00000109321	A330076H08Rik	7	61930137	-1	7 C-B5	NA	cent_7	P	FALSE	NA	FALSE	NA	NA	NA
ENSMUSG00000045813	Gm9801	7	62094506	-1	7 C-B5	NA	cent_7	P	FALSE	NA	FALSE	NA	NA	NA
ENSMUSG00000030638	Sh3gl3	7	82173840	1	7 D3	NA	misc_7	P	TRUE	FALSE	FALSE	-0.143006	NA	NA
ENSMUSG00000030724	Cd19	7	126408450	-1	NA	NA	distcent_7	M	FALSE	NA	FALSE	NA	NA	NA
ENSMUSG00000030782	Tgfb1i1	7	128246812	1	7 F3	NA	distcent_7	M	TRUE	FALSE	FALSE	-0.0785143	NA	NA
ENSMUSG00000087090	Nctc1	7	142544609	-1	7 F5	NA	dist_7	P	FALSE	NA	FALSE	NA	NA	NA
ENSMUSG00000000215	Ins2	7	142678656	-1	7 F5	NA	dist_7	P	FALSE	NA	FALSE	NA	NA	NA
ENSMUSG00000000214	Th	7	142892752	-1	7 F5	NA	dist_7	M	TRUE	FALSE	FALSE	-0.21544	NA	NA
ENSMUSG00000059277	R74862	7	143021784	-1	7 F5	NA	dist_7	M	FALSE	NA	FALSE	NA	NA	NA
NA	AF313042	7	143462528	NA	7 F5	NA	dist_7	M	FALSE	NA	FALSE	NA	NA	NA
ENSMUSG00000109251	E230032D23Rik	7	143628024	1	7	NA	dist_7	M	FALSE	NA	FALSE	NA	NA	NA
NA	Peg3os	7	NA	NA	7 A1	NA	prox_7	P	FALSE	NA	FALSE	NA	NA	NA
NA	Mkrn3os	7	NA	NA	7C-B5	NA	cent_7	P	FALSE	NA	FALSE	NA	NA	NA
NA	BM117114	7	NA	NA	7C-B5	NA	cent_7	P	FALSE	NA	FALSE	NA	NA	NA
NA	Pec2	7	NA	NA	7C-B5	NA	cent_7	P	FALSE	NA	FALSE	NA	NA	NA
NA	BB077283	7	NA	NA	7C-B5	NA	cent_7	P	FALSE	NA	FALSE	NA	NA	NA
NA	Pec3	7	NA	NA	7C-B5	NA	cent_7	P	FALSE	NA	FALSE	NA	NA	NA
NA	Snord116_cluster	7	NA	NA	7C-B5	pwcr1	cent_7	P	FALSE	NA	FALSE	NA	NA	NA
NA	Snord115_cluster	7	NA	NA	7C-B5	pwcr1	cent_7	P	FALSE	NA	FALSE	NA	NA	NA
NA	U80893	7	NA	NA	7C-B5	NA	cent_7	P	FALSE	NA	FALSE	NA	NA	NA
NA	PIHit	7	NA	NA	7 F5	NA	dist_7	P	FALSE	NA	FALSE	NA	NA	NA
NA	Tsci1	8	80859408	1	8	NA	misc_8	P	FALSE	NA	FALSE	NA	NA	NA
ENSMUSG00000040111	Gramd1b	9	40293233	-1	9 A5.1	NA	misc_9	P	TRUE	FALSE	FALSE	-0.110824	NA	NA
ENSMUSG00000032094	Cd3d	9	44981786	1	NA	NA	misc_9	M	FALSE	NA	FALSE	NA	NA	NA
ENSMUSG00000032299	Commd4	9	57155035	-1	NA	NA	misc_9	P	TRUE	FALSE	FALSE	NA	NA	NA
ENSMUSG00000032280	Tle3	9	61372366	1	9 B	NA	misc_9	P	TRUE	FALSE	FALSE	NA	NA	NA
ENSMUSG00000040204	Pclaf	9	65890237	1	NA	NA	misc_9	P	TRUE	FALSE	FALSE	NA	NA	NA
ENSMUSG00000065596	Mir184	9	89802260	-1	9 E3.1	NA	dist_9	P	FALSE	NA	FALSE	NA	NA	NA
ENSMUSG00000098627	4930524O08Rik	9	89826519	1	9 E3.1	NA	dist_9	P	FALSE	NA	FALSE	NA	NA	NA
ENSMUSG00000032356	Rasgrf1	9	89909908	1	9 E3.1	NA	dist_9	P	TRUE	TRUE	FALSE	0.173901	NA	NA
ENSMUSG00000032454	Rbp2	9	98486115	1	9 E3.3	NA	dist_9	P	TRUE	TRUE	FALSE	NaN	NA	NA
NA	AS4	9	NA	1	9 E3.1	NA	dist_9	P	FALSE	NA	FALSE	NA	NA	NA
ENSMUSG00000025383	Il23a	10	128296139	-1	NA	NA	dist_10	M	FALSE	NA	FALSE	NA	NA	NA
ENSMUSG00000020182	Ddc	11	11814101	-1	11 A1	NA	prox_11	P	TRUE	FALSE	FALSE	0.0620056	NA	NA
NA	XLOC_011039	11	12037523	1	11	NA	misc_11	M	FALSE	NA	FALSE	NA	NA	NA
NA	Tsci2	11	12151320	1	11	NA	misc_11	M	FALSE	NA	FALSE	NA	NA	NA
ENSMUSG00000020399	Havcr2	11	46454935	1	NA	NA	misc_11	M	FALSE	NA	FALSE	NA	NA	NA
ENSMUSG00000036545	Adamts2	11	50602084	1	11 B1.3	NA	misc_11	P	TRUE	FALSE	FALSE	-0.126489	NA	NA
ENSMUSG00000035112	Wnk4	11	101260567	1	11 D	NA	misc_11	M	TRUE	FALSE	FALSE	-0.075585	NA	NA
ENSMUSG00000066632	Pgk1-rs7	12	10898986	-1	NA	NA	misc_12	M	FALSE	NA	FALSE	NA	NA	NA
ENSMUSG00000112546	Gm6992	12	31018218	1	NA	NA	misc_12	P	FALSE	NA	FALSE	NA	NA	NA
NA	Tsci4	12	81007809	-1	12	NA	misc_12	P	FALSE	NA	FALSE	NA	NA	NA
ENSMUSG00000047415	Gpr68	12	100876682	-1	12 F1	NA	dist_12	M	FALSE	NA	FALSE	NA	NA	NA
ENSMUSG00000040867	Begain	12	109032187	-1	12 F1	NA	dist_12	P	FALSE	NA	FALSE	NA	NA	NA
ENSMUSG00000112977	Gm34081	12	109493529	-1	12	NA	dist_12	M	FALSE	NA	FALSE	NA	NA	NA
ENSMUSG00000065526	Mir337	12	109585789	1	12 F1	NA	dist_12	M	FALSE	NA	FALSE	NA	NA	NA
ENSMUSG00000070080	Mir431	12	109590447	1	12 F1	anti-Rtl1	dist_12	M	FALSE	NA	FALSE	NA	NA	NA
ENSMUSG00000070072	Mir433	12	109591715	1	12 F1	anti-Rtl1	dist_12	M	FALSE	NA	FALSE	NA	NA	NA
ENSMUSG00000070076	Mir127	12	109592846	1	12 F1	anti-Rtl1	dist_12	M	FALSE	NA	FALSE	NA	NA	NA
ENSMUSG00000070133	Mir434	12	109594506	1	12 F1	anti-Rtl1	dist_12	M	FALSE	NA	FALSE	NA	NA	NA
ENSMUSG00000087855	Mir432	12	109594956	1	12 F1	anti-Rtl1	dist_12	M	FALSE	NA	FALSE	NA	NA	NA
ENSMUSG00000104858	Mir136	12	109595327	1	12 F1	anti-Rtl1	dist_12	M	FALSE	NA	FALSE	NA	NA	NA
ENSMUSG00000065433	Mir370	12	109618258	1	12 F1	Rian	dist_12	M	FALSE	NA	FALSE	NA	NA	NA
ENSMUSG00000088294	AF357425	12	109636012	1	12 F1	Rian	dist_12	M	FALSE	NA	FALSE	NA	NA	NA
NA	AF357426	12	109642838	1	12 F1	Rian	dist_12	M	FALSE	NA	FALSE	NA	NA	NA
NA	AF357359	12	109650709	1	12 F1	Rian	dist_12	M	FALSE	NA	FALSE	NA	NA	NA
ENSMUSG00000064621	Gm26922	12	109654627	1	12 F1	Rian	dist_12	M	FALSE	NA	FALSE	NA	NA	NA
ENSMUSG00000065749	AF357428	12	109679945	1	12 F1	Rian	dist_12	M	FALSE	NA	FALSE	NA	NA	NA
ENSMUSG00000065022	AF357341	12	109681519	1	12 F1	Rian	dist_12	M	FALSE	NA	FALSE	NA	NA	NA
ENSMUSG00000065477	Mir411	12	109710175	1	12 F1	Mirg	dist_12	M	FALSE	NA	FALSE	NA	NA	NA
ENSMUSG00000104582	Mir380	12	109711803	1	12 F1	Mirg	dist_12	M	FALSE	NA	FALSE	NA	NA	NA
ENSMUSG00000105853	Mir376b	12	109723458	1	12 F1	Mirg	dist_12	M	FALSE	NA	FALSE	NA	NA	NA
ENSMUSG00000065426	Mir134	12	109734139	1	12 F1	Mirg	dist_12	M	FALSE	NA	FALSE	NA	NA	NA
ENSMUSG00000065448	Mir154	12	109738433	1	12 F1	Mirg	dist_12	M	FALSE	NA	FALSE	NA	NA	NA
ENSMUSG00000065497	Mir410	12	109743715	1	12 F1	Mirg	dist_12	M	FALSE	NA	FALSE	NA	NA	NA
ENSMUSG00000104213	Ighd	12	113406604	-1	NA	NA	dist_12	M	FALSE	NA	FALSE	NA	NA	NA
NA	DLK1 downstream transcripts	12	NA	NA	12 F1	NA	NA	P	FALSE	NA	FALSE	NA	NA	NA
NA	Mico1	12	NA	NA	12 F1	NA	NA	M	FALSE	NA	FALSE	NA	NA	NA
NA	Mico1os	12	NA	NA	12 F1	NA	NA	M	FALSE	NA	FALSE	NA	NA	NA
NA	anti-Rtl1	12	NA	NA	12 F1	anti-Rtl1	dist_12	M	FALSE	NA	FALSE	NA	NA	NA
ENSMUSG00000053101	Gpr141	13	19749682	-1	NA	NA	misc_13	M	FALSE	NA	FALSE	NA	NA	NA
ENSMUSG00000018259	Prl8a2	13	27345673	1	NA	NA	cent_13	M	TRUE	TRUE	FALSE	-0.344641	NA	NA
ENSMUSG00000047842	Diras2	13	52504380	-1	NA	NA	cent_13	M	TRUE	FALSE	FALSE	-0.189797	NA	NA
ENSMUSG00000046082	Tmem174	13	98634978	-1	13 D1	NA	dist_13	P	FALSE	NA	FALSE	NA	NA	NA
ENSMUSG00000021848	Otx2	14	48657677	-1	14 C1	NA	prox_14	P	FALSE	NA	FALSE	NA	NA	NA
ENSMUSG00000098682	Otx2os1	14	48668708	1	14 C1	NA	prox_14	P	FALSE	NA	FALSE	NA	NA	NA
ENSMUSG00000040314	Ctsg	14	56099881	-1	NA	NA	prox_14	M	FALSE	NA	FALSE	NA	NA	NA
ENSMUSG00000015441	Gzmf	14	56205263	-1	NA	NA	prox_14	M	TRUE	TRUE	FALSE	-0.0625	NA	NA
ENSMUSG00000033470	Cysltr2	14	73025603	-1	NA	NA	cent_14	M	FALSE	NA	FALSE	NA	NA	NA
ENSMUSG00000034997	Htr2a	14	74640840	1	14 D2	NA	cent_14	M	FALSE	NA	FALSE	NA	NA	NA
ENSMUSG00000061517	Sox21	14	118233232	-1	14 E4	NA	misc_14	P	TRUE	FALSE	FALSE	-0.0905	NA	NA
ENSMUSG00000036760	Kcnk9	15	72501089	-1	15 D3	NA	cent_15	M	FALSE	NA	FALSE	NA	NA	NA
ENSMUSG00000068391	Chrac1	15	73090392	1	15 D3	NA	cent_15	M	TRUE	FALSE	FALSE	0.0510825	NA	NA
ENSMUSG00000116295	Gm32885	15	97157029	-1	15	NA	misc_15	P	FALSE	NA	FALSE	NA	NA	NA
ENSMUSG00000037280	Galnt6	15	100691813	-1	15 F1	NA	misc_15	P	TRUE	FALSE	FALSE	0.0739597	NA	NA
ENSMUSG00000022657	Cd96	16	46035657	-1	NA	NA	cent_16	M	FALSE	NA	FALSE	NA	NA	NA
ENSMUSG00000022651	Retnlg	16	48872621	1	NA	NA	cent_16	M	FALSE	NA	FALSE	NA	NA	NA
ENSMUSG00000022952	Runx1	16	92601466	-1	16 C4	NA	misc_16	P	TRUE	FALSE	FALSE	0.291093	NA	NA
NA	XLOC_037414	17	4983739	-1	17	NA	prox_17	M	FALSE	NA	FALSE	NA	NA	NA
ENSMUSG00000069729	Arid1b	17	4994332	1	17 A1	NA	prox_17	M	TRUE	TRUE	FALSE	NA	NA	NA
ENSMUSG00000034265	Zdhhc14	17	5492557	1	17A1	NA	prox_17	M	TRUE	TRUE	FALSE	NA	NA	NA
ENSMUSG00000073471	Rsph3a	17	7945614	1	17A1	NA	prox_17	M	TRUE	TRUE	FALSE	NA	NA	NA
ENSMUSG00000023861	Mpc1	17	8282904	1	17A1	NA	prox_17	M	TRUE	TRUE	FALSE	NA	NA	NA
ENSMUSG00000023868	Pde10a	17	8525372	1	17A1	NA	prox_17	M	TRUE	TRUE	FALSE	NA	NA	NA
ENSMUSG00000023873	1700010I14Rik	17	8988333	1	17 A1	NA	prox_17	M	FALSE	NA	FALSE	NA	NA	NA
ENSMUSG00000062078	Qk	17	10202601	-1	17 A1	NA	prox_17	M	TRUE	FALSE	FALSE	NA	NA	NA
ENSMUSG00000037196	Pacrg	17	10403012	-1	17 A1	NA	prox_17	M	FALSE	NA	FALSE	NA	NA	NA
ENSMUSG00000023826	Prkn	17	10840384	1	17 A1	NA	prox_17	M	TRUE	TRUE	FALSE	NA	NA	NA
NA	XLOC_037615	17	12356364	-1	17	NA	prox_17	M	FALSE	NA	FALSE	NA	NA	NA
ENSMUSG00000023828	Slc22a3	17	12418960	-1	17 A1	NA	prox_17	M	TRUE	TRUE	FALSE	NA	NA	NA
ENSMUSG00000040966	Slc22a2	17	12584132	1	17 A1	NA	prox_17	M	FALSE	NA	FALSE	NA	NA	NA
ENSMUSG00000023830	Igf2r	17	12682406	-1	17 A1	NA	prox_17	M	TRUE	TRUE	FALSE	NA	NA	NA
ENSMUSG00000078247	Airn	17	12741311	1	17 A1	NA	prox_17	P	TRUE	TRUE	FALSE	NA	NA	NA
ENSMUSG00000089769	Gm16574	17	12818793	1	NA	NA	prox_17	P	FALSE	NA	FALSE	NA	NA	NA
ENSMUSG00000089817	Gm7162	17	12819819	-1	NA	NA	prox_17	P	TRUE	TRUE	FALSE	NA	NA	NA
ENSMUSG00000073460	Pnldc1	17	12888902	-1	NA	NA	prox_17	M	TRUE	TRUE	FALSE	NA	NA	NA
ENSMUSG00000067049	Unc93a	17	13108617	-1	NA	NA	prox_17	M	FALSE	NA	FALSE	NA	NA	NA
ENSMUSG00000048826	Dact2	17	14195052	-1	17 A2	NA	prox_17	M	TRUE	TRUE	FALSE	NA	NA	NA
ENSMUSG00000023886	Smoc2	17	14279506	1	17 A2	NA	prox_17	M	TRUE	TRUE	FALSE	NA	NA	NA
ENSMUSG00000023885	Thbs2	17	14665500	-1	17 A2	NA	prox_17	M	TRUE	TRUE	FALSE	NA	NA	NA
ENSMUSG00000036594	H2-Aa	17	34282744	-1	NA	NA	misc_17	M	TRUE	TRUE	FALSE	NA	NA	NA
NA	CrossFirre	17	NA	NA	X A5	NA	NA	M	FALSE	NA	FALSE	NA	NA	NA
ENSMUSG00000043458	Pcdhb12	18	37435621	1	18 B3	NA	misc_18	M	FALSE	NA	FALSE	NA	NA	NA
ENSMUSG00000075010	AW112010	19	11047617	-1	NA	NA	misc_19	M	TRUE	TRUE	FALSE	NA	NA	NA
ENSMUSG00000024673	Ms4a1	19	11249675	-1	NA	NA	misc_19	M	FALSE	NA	FALSE	NA	NA	NA
ENSMUSG00000052387	Trpm3	19	22139119	1	NA	NA	misc_19	M	FALSE	NA	FALSE	NA	NA	NA
ENSMUSG00000048720	Tbc1d12	19	38836579	1	19 C3	NA	cent_19	P	TRUE	FALSE	FALSE	NA	NA	NA
ENSMUSG00000089679	Gm16299	19	53819354	-1	19 D2	NA	cent_19	P	FALSE	NA	FALSE	NA	NA	NA
ENSMUSG00000095180	Rhox5	X	37804842	1	X A3.3	NA	cent_X	M	FALSE	NA	FALSE	NA	NA	NA
ENSMUSG00000073125	Xlr3b	X	73192207	1	X A7	NA	dist_X	M	FALSE	NA	FALSE	NA	NA	NA
ENSMUSG00000067768	Xlr4b	X	73214333	1	X A7	NA	dist_X	M	FALSE	NA	FALSE	NA	NA	NA
ENSMUSG00000031362	Xlr4c	X	73233688	-1	X A7	NA	dist_X	M	FALSE	NA	FALSE	NA	NA	NA
ENSMUSG00000085715	Tsix	X	103431517	1	X D	NA	dist_X	P	FALSE	NA	FALSE	NA	NA	NA
ENSMUSG00000086503	Xist	X	103460366	-1	X D	NA	dist_X	P	FALSE	NA	FALSE	NA	NA	NA
ENSMUSG00000097571	Jpx	X	103493556	1	X D	NA	dist_X	P	FALSE	NA	FALSE	NA	NA	NA
ENSMUSG00000086370	Ftx	X	103560907	-1	X D	NA	dist_X	M	FALSE	NA	FALSE	NA	NA	NA
ENSMUSG00000031330	Zcchc13	X	103630586	1	X D	NA	dist_X	M	FALSE	NA	FALSE	NA	NA	NA

## Sheet: E14.5_matzyg_zygvsmat
Supplementary file 1h. Differential imprinted expression in male E14.5 B6(CastB6) placentae, Smchd1 zygΔ vs matΔ. A gene is called differentiallly imprinted if the multiple-testing corrected p-value is below 0.05 and the absolute difference in silent allele proportion greater than 0.05
ensembl_gene_id	gene	chromosome_name	start_position	strand	location	locus	cluster	expressed_allele	expressed	imprinted	sufficient_counts	zyg_minus_oo	padj	diff_imprinted
ENSMUSG00000002265	Peg3	7	6703892	-1	7 A2-B1	NA	prox_7	P	TRUE	TRUE	TRUE	-0.309663	0	TRUE
ENSMUSG00000056972	Magel2	7	62377010	1	7 C-B5	NA	cent_7	P	TRUE	TRUE	TRUE	0.288099	1.93179e-14	TRUE
ENSMUSG00000023828	Slc22a3	17	12418960	-1	17 A1	NA	prox_17	M	TRUE	TRUE	TRUE	0.208581	2.41408e-09	TRUE
ENSMUSG00000061186	Sfmbt2	2	10370510	1	2 A1	NA	prox_2	P	TRUE	TRUE	TRUE	0.266722	3.32963e-09	TRUE
ENSMUSG00000051855	Mest	6	30723547	1	6 A3	NA	prox_6	isoform-specific	TRUE	TRUE	TRUE	-0.117352	3.96861e-06	TRUE
ENSMUSG00000028339	Col15a1	4	47208161	1	NA	NA	misc_4	M	TRUE	TRUE	TRUE	0.344957	9.6244e-05	TRUE
ENSMUSG00000033585	Ndn	7	62346569	1	7 C-B5	NA	cent_7	P	TRUE	TRUE	TRUE	0.230503	0.00112829	TRUE
ENSMUSG00000029096	Htra3	5	35652023	-1	5 B3	NA	prox_5	M	TRUE	TRUE	TRUE	0.240095	0.0103002	TRUE
ENSMUSG00000032359	Ctsh	9	90054152	1	9 E3.1	NA	dist_9	P	TRUE	TRUE	TRUE	-0.0845313	0.0103002	TRUE
ENSMUSG00000028859	Csf3r	4	126024550	1	NA	NA	misc_4	M	TRUE	TRUE	TRUE	0.261895	0.010883	TRUE
ENSMUSG00000016458	Wt1	2	105126529	1	2 E2-E3	NA	prox_2	M	TRUE	TRUE	TRUE	0.169704	0.0117238	TRUE
ENSMUSG00000027551	Zfp64	2	168893331	-1	2 H3	NA	dist_2	P	TRUE	TRUE	TRUE	-0.0935822	0.0117238	TRUE
ENSMUSG00000086748	Gm13261	2	10339283	-1	NA	NA	prox_2	P	TRUE	TRUE	TRUE	0.23493	0.021015	TRUE
ENSMUSG00000023868	Pde10a	17	8525372	1	17A1	NA	prox_17	M	TRUE	TRUE	TRUE	0.0905243	0.0383045	TRUE
ENSMUSG00000031714	Gab1	8	80764438	-1	8 C2	NA	misc_8	P	TRUE	TRUE	TRUE	0.0857172	0.0663183	FALSE
ENSMUSG00000022464	Slc38a4	15	96994820	-1	15 F1	NA	misc_15	P	TRUE	TRUE	TRUE	-0.0937388	0.0663183	FALSE
ENSMUSG00000044068	Zrsr1	11	22972005	1	11 A3	NA	prox_11	P	TRUE	TRUE	TRUE	0.122812	0.0840013	FALSE
ENSMUSG00000027520	Zdbf2	1	63273265	1	1 C2	GPR1	cent_1	P	TRUE	TRUE	TRUE	-0.0892614	0.0895159	FALSE
ENSMUSG00000051527	Usp29	7	6730578	1	7 A2-B1	NA	prox_7	P	TRUE	TRUE	TRUE	-0.0691424	0.0895159	FALSE
ENSMUSG00000029304	Spp1	5	104435118	1	NA	NA	misc_5	M	TRUE	TRUE	TRUE	0.0597266	0.098049	FALSE
ENSMUSG00000070526	Peg12	7	62461871	-1	7 C-B5	NA	cent_7	P	TRUE	TRUE	TRUE	0.161064	0.100547	FALSE
ENSMUSG00000028581	Laptm5	4	130913125	1	NA	NA	misc_4	M	TRUE	TRUE	TRUE	0.102448	0.197044	FALSE
ENSMUSG00000021136	Smoc1	12	81026808	1	12 D1	NA	misc_12	P	TRUE	TRUE	TRUE	0.0716049	0.241514	FALSE
ENSMUSG00000018259	Prl8a2	13	27345673	1	NA	NA	cent_13	M	TRUE	TRUE	TRUE	0.00720424	0.341027	FALSE
ENSMUSG00000062866	Phactr2	10	13207717	-1	10 A1	NA	cent_10	M	TRUE	TRUE	TRUE	0.0560455	0.446581	FALSE
ENSMUSG00000008999	Bmp7	2	172868012	-1	2 H3	NA	dist_2	P	TRUE	TRUE	TRUE	-0.168243	0.493719	FALSE
ENSMUSG00000027523	Gnas	2	174284320	1	2 H4	Gnas	dist_2	M	TRUE	TRUE	TRUE	-0.0844327	0.493719	FALSE
ENSMUSG00000069729	Arid1b	17	4994332	1	17 A1	NA	prox_17	M	TRUE	TRUE	TRUE	0.0637915	0.493719	FALSE
ENSMUSG00000019817	Plagl1	10	13060504	1	10 A2	NA	cent_10	P	TRUE	TRUE	TRUE	-0.020451	0.501707	FALSE
ENSMUSG00000025607	Copg2	6	30747554	-1	6 A3	NA	prox_6	M	TRUE	TRUE	TRUE	-0.0909041	0.509373	FALSE
ENSMUSG00000002266	Zim1	7	6671269	-1	7 A2-B1	NA	prox_7	M	TRUE	TRUE	TRUE	0.00285716	0.509373	FALSE
ENSMUSG00000023885	Thbs2	17	14665500	-1	17 A2	NA	prox_17	M	TRUE	TRUE	TRUE	0.0510115	0.519962	FALSE
ENSMUSG00000023886	Smoc2	17	14279506	1	17 A2	NA	prox_17	M	TRUE	TRUE	TRUE	0.0192419	0.54422	FALSE
ENSMUSG00000082536	Gm13456	2	40555752	1	NA	NA	prox_2	M	TRUE	TRUE	TRUE	-0.0192045	0.558028	FALSE
ENSMUSG00000102252	Snrpn	7	59982495	-1	7 C-B5	SNURF-SNRPN	cent_7	P	TRUE	TRUE	TRUE	0.00866496	0.558028	FALSE
ENSMUSG00000059256	Gzmd	14	56129556	-1	NA	NA	prox_14	M	TRUE	TRUE	TRUE	-0.0194243	0.606372	FALSE
ENSMUSG00000024423	Impact	18	12955852	1	18 A2-B2	NA	cent_18	P	TRUE	TRUE	TRUE	-0.0437718	0.612473	FALSE
ENSMUSG00000070527	Mkrn3	7	62417593	-1	7 C-B5	NA	cent_7	P	TRUE	TRUE	TRUE	0.0728145	0.615192	FALSE
ENSMUSG00000092035	Peg10	6	4747306	1	6 A1	NA	prox_6	P	TRUE	TRUE	TRUE	-0.00530255	0.647183	FALSE
ENSMUSG00000019814	Ltv1	10	13178140	-1	NA	NA	cent_10	M	TRUE	TRUE	TRUE	-0.0390186	0.647183	FALSE
ENSMUSG00000097391	Mirg	12	109729764	1	12 F1	Mirg	dist_12	M	TRUE	TRUE	TRUE	-0.0117082	0.647183	FALSE
ENSMUSG00000023830	Igf2r	17	12682406	-1	17 A1	NA	prox_17	M	TRUE	TRUE	TRUE	-0.0241254	0.647183	FALSE
ENSMUSG00000024610	Cd74	18	60803848	1	NA	NA	misc_18	M	TRUE	TRUE	TRUE	0.0450521	0.647183	FALSE
ENSMUSG00000097694	G730013B05Rik	16	50526245	1	16 B5	NA	cent_16	P	TRUE	TRUE	TRUE	0.0532764	0.657701	FALSE
ENSMUSG00000020176	Grb10	11	11930508	-1	11 A1	NA	prox_11	isoform-specific	TRUE	TRUE	TRUE	0.0331846	0.682346	FALSE
ENSMUSG00000040856	Dlk1	12	109452823	1	12 F1	NA	dist_12	P	TRUE	TRUE	TRUE	-0.00976466	0.682346	FALSE
ENSMUSG00000022156	Gzme	14	56117626	-1	NA	NA	prox_14	M	TRUE	TRUE	TRUE	-0.0200161	0.682346	FALSE
ENSMUSG00000040013	Fkbp6	5	135291704	-1	5 G2	NA	misc_5	P	TRUE	TRUE	TRUE	-0.024112	0.701085	FALSE
ENSMUSG00000032827	Ppp1r9a	6	4902917	1	6 A1	NA	prox_6	M	TRUE	TRUE	TRUE	0.0379352	0.701085	FALSE
ENSMUSG00000029775	Klhdc10	6	30401868	1	6 A3	NA	prox_6	M	TRUE	TRUE	TRUE	-0.0488377	0.701085	FALSE
ENSMUSG00000031962	Cdh15	8	122847966	1	8 E1	NA	misc_8	isoform-specific	TRUE	TRUE	TRUE	-0.05	0.707005	FALSE
ENSMUSG00000083219	Gm11410	4	80003989	1	NA	NA	misc_4	M	TRUE	TRUE	TRUE	-0.0109319	0.725341	FALSE
ENSMUSG00000025764	Jade1	3	41555731	1	3 B	NA	cent_3	P	TRUE	TRUE	TRUE	0.0337872	0.743011	FALSE
ENSMUSG00000085925	Rtl1	12	109589193	-1	12 F1	NA	dist_12	P	TRUE	TRUE	TRUE	-0.0122881	0.750919	FALSE
ENSMUSG00000085860	2410003L11Rik	11	97598511	1	11 D	NA	misc_11	P	TRUE	TRUE	TRUE	-0.0371226	0.770361	FALSE
ENSMUSG00000023826	Prkn	17	10840384	1	17 A1	NA	prox_17	M	TRUE	TRUE	TRUE	0.0788584	0.780914	FALSE
ENSMUSG00000000948	Gm38393	7	59974149	-1	7 C-B5	NA	cent_7	P	TRUE	TRUE	TRUE	-0.0124074	0.814622	FALSE
ENSMUSG00000036698	Ago2	15	73095844	-1	15 D3	NA	cent_15	M	TRUE	TRUE	TRUE	-0.0276084	0.821759	FALSE
ENSMUSG00000086646	Platr20	11	51189833	-1	11 B1.3	NA	misc_11	P	TRUE	TRUE	TRUE	-0.0256725	0.827033	FALSE
ENSMUSG00000034265	Zdhhc14	17	5492557	1	17A1	NA	prox_17	M	TRUE	TRUE	TRUE	0.0225384	0.827033	FALSE
ENSMUSG00000023861	Mpc1	17	8282904	1	17A1	NA	prox_17	M	TRUE	TRUE	TRUE	0.0198626	0.827033	FALSE
ENSMUSG00000100826	Snhg14	7	59307924	-1	7 C-B5	NA	cent_7	P	TRUE	TRUE	TRUE	0.00421351	0.839939	FALSE
ENSMUSG00000043439	Epop	11	97627389	-1	NA	NA	misc_11	P	TRUE	TRUE	TRUE	-0.01942	0.921362	FALSE
ENSMUSG00000004631	Sgce	6	4674350	-1	6 A1	NA	prox_6	P	TRUE	TRUE	TRUE	0.0116258	0.953894	FALSE
ENSMUSG00000073209	Klf14	6	30956023	-1	6 A3	NA	prox_6	M	TRUE	TRUE	TRUE	0.00514352	0.953894	FALSE
ENSMUSG00000075707	Dio3	12	110279068	1	12 F1	NA	dist_12	P	TRUE	TRUE	TRUE	0.004009	0.953894	FALSE
ENSMUSG00000073471	Rsph3a	17	7945614	1	17A1	NA	prox_17	M	TRUE	TRUE	TRUE	0.0137224	0.953894	FALSE
ENSMUSG00000036594	H2-Aa	17	34282744	-1	NA	NA	misc_17	M	TRUE	TRUE	TRUE	-0.00666186	0.953894	FALSE
ENSMUSG00000019188	H13	2	152669461	1	2 H1	NA	dist_2	isoform-specific	TRUE	TRUE	TRUE	0.00865703	0.960742	FALSE
ENSMUSG00000097639	Platr4	3	41484024	-1	3 B	NA	cent_3	P	TRUE	TRUE	TRUE	-0.00168874	0.960742	FALSE
ENSMUSG00000056071	S100a9	3	90692632	-1	NA	NA	misc_3	M	TRUE	TRUE	TRUE	0.0315377	0.960742	FALSE
ENSMUSG00000037202	Prf1	10	61297833	1	NA	NA	mid_10	M	TRUE	TRUE	TRUE	0	0.960742	FALSE
ENSMUSG00000079186	Gzmc	14	56231441	-1	NA	NA	prox_14	M	TRUE	TRUE	TRUE	0.00397351	0.960742	FALSE
ENSMUSG00000078247	Airn	17	12741311	1	17 A1	NA	prox_17	P	TRUE	TRUE	TRUE	-0.0122672	0.960742	FALSE
ENSMUSG00000026395	Ptprc	1	138062861	-1	NA	NA	misc_1	M	TRUE	TRUE	TRUE	0.0201232	0.972113	FALSE
ENSMUSG00000042814	Mcts2	2	152687035	1	2 H1	NA	dist_2	P	TRUE	TRUE	TRUE	0.00150214	0.972113	FALSE
ENSMUSG00000000290	Itgb2	10	77530252	1	NA	NA	mid_10	M	TRUE	TRUE	TRUE	0.0933775	0.972113	FALSE
ENSMUSG00000045942	BC049762	11	51253651	-1	11 B1.3	NA	misc_11	P	TRUE	TRUE	TRUE	-0.0519818	0.972113	FALSE
ENSMUSG00000021268	Meg3	12	109541001	1	12 F1	NA	dist_12	M	TRUE	TRUE	TRUE	0.00152055	0.972113	FALSE
ENSMUSG00000042607	Asb4	6	5383386	1	6 A1	NA	prox_6	M	TRUE	TRUE	TRUE	-0.00423195	0.974069	FALSE
ENSMUSG00000097451	Rian	12	109603940	1	12 F1	NA	dist_12	M	TRUE	TRUE	TRUE	0.00168048	0.974069	FALSE
ENSMUSG00000040284	Gzmg	14	56156582	-1	NA	NA	prox_14	M	TRUE	TRUE	TRUE	0.00606061	0.974069	FALSE
ENSMUSG00000081833	Gm13669	2	75808358	1	NA	NA	prox_2	M	TRUE	TRUE	TRUE	0.00703247	0.985295	FALSE
ENSMUSG00000087119	Atg4a-ps	3	103643954	-1	NA	NA	misc_3	M	TRUE	TRUE	TRUE	0	0.985295	FALSE
ENSMUSG00000106847	Peg13	15	72805600	-1	15 D3	NA	cent_15	P	TRUE	TRUE	TRUE	-0.0109465	0.985295	FALSE
ENSMUSG00000089817	Gm7162	17	12819819	-1	NA	NA	prox_17	P	TRUE	TRUE	TRUE	0.00772947	0.985295	FALSE
ENSMUSG00000048826	Dact2	17	14195052	-1	17 A2	NA	prox_17	M	TRUE	TRUE	TRUE	0.00173205	0.985295	FALSE
ENSMUSG00000025967	Eef1b2	1	63176825	1	1 C2	GPR1	cent_1	P	TRUE	FALSE	FALSE	0.00170342	NA	FALSE
ENSMUSG00000046856	Gpr1	1	63182691	-1	1 C2	GPR1	cent_1	P	TRUE	FALSE	FALSE	-0.0205608	NA	FALSE
ENSMUSG00000025964	Adam23	1	63445891	1	1 C2	GPR1	cent_1	P	TRUE	FALSE	FALSE	-0.000200695	NA	FALSE
ENSMUSG00000026470	Stx6	1	155158715	1	1 G3	NA	misc_1	M	TRUE	FALSE	FALSE	0.00267726	NA	FALSE
ENSMUSG00000033722	BC034090	1	155212471	-1	1 G3	NA	misc_1	M	TRUE	FALSE	FALSE	-0.00106259	NA	FALSE
ENSMUSG00000026970	Rbms1	2	60750193	-1	2 C1.2	NA	prox_2	P	TRUE	FALSE	FALSE	0.0122658	NA	FALSE
ENSMUSG00000042745	Id1	2	152736251	1	2 H1	NA	dist_2	P	TRUE	FALSE	FALSE	0.00189312	NA	FALSE
ENSMUSG00000009876	Cox4i2	2	152754173	1	2 H1	NA	dist_2	P	TRUE	FALSE	FALSE	-0.0357244	NA	FALSE
ENSMUSG00000007659	Bcl2l1	2	152780668	-1	2 H1	NA	dist_2	P	TRUE	FALSE	FALSE	-0.0176292	NA	FALSE
ENSMUSG00000027469	Tpx2	2	152847964	1	2 H1	NA	dist_2	P	TRUE	FALSE	FALSE	-0.00441233	NA	FALSE
ENSMUSG00000067787	Blcap	2	157556362	-1	2 H1	NA	dist_2	isoform-specific	TRUE	FALSE	FALSE	0.0212565	NA	FALSE
ENSMUSG00000027522	Stx16	2	174076308	1	2 H4	NA	dist_2	M	TRUE	FALSE	FALSE	-0.0106152	NA	FALSE
ENSMUSG00000039263	Npepl1	2	174110349	1	2 H4	NA	dist_2	M	TRUE	FALSE	FALSE	0.0110843	NA	FALSE
ENSMUSG00000015189	Casd1	6	4600839	1	6 A1	NA	prox_6	M	TRUE	FALSE	FALSE	-0.0291595	NA	FALSE
ENSMUSG00000029804	Herc3	6	58831465	1	6 B3	NA	prox_6	isoform-specific	TRUE	FALSE	FALSE	-0.00683725	NA	FALSE
ENSMUSG00000002602	Axl	7	25757273	-1	7 A3-B1	NA	misc_7	M	TRUE	FALSE	FALSE	-0.0160643	NA	FALSE
ENSMUSG00000025326	Ube3a	7	59228750	1	7 C-B5	NA	cent_7	M	TRUE	FALSE	FALSE	0.0363499	NA	FALSE
ENSMUSG00000031665	Sall1	8	89027235	-1	NA	NA	misc_8	P	TRUE	FALSE	FALSE	-0.0363008	NA	FALSE
ENSMUSG00000040111	Gramd1b	9	40293233	-1	9 A5.1	NA	misc_9	P	TRUE	FALSE	FALSE	0.0250382	NA	FALSE
ENSMUSG00000032299	Commd4	9	57155035	-1	NA	NA	misc_9	P	TRUE	FALSE	FALSE	0.0215491	NA	FALSE
ENSMUSG00000032280	Tle3	9	61372366	1	9 B	NA	misc_9	P	TRUE	FALSE	FALSE	0.0167072	NA	FALSE
ENSMUSG00000040204	Pclaf	9	65890237	1	NA	NA	misc_9	P	TRUE	FALSE	FALSE	-0.0140865	NA	FALSE
ENSMUSG00000032422	Snx14	9	88376750	-1	9 E3.1	NA	dist_9	P	TRUE	FALSE	FALSE	0.0127591	NA	FALSE
ENSMUSG00000032356	Rasgrf1	9	89909908	1	9 E3.1	NA	dist_9	P	TRUE	TRUE	FALSE	-0.0461871	NA	FALSE
ENSMUSG00000019795	Pcmt1	10	7629373	-1	10 A1	NA	misc_10	P	TRUE	FALSE	FALSE	0.00331494	NA	FALSE
ENSMUSG00000020182	Ddc	11	11814101	-1	11 A1	NA	prox_11	P	TRUE	FALSE	FALSE	0	NA	FALSE
ENSMUSG00000051650	B3gnt2	11	22759738	-1	11 A3.2	NA	prox_11	M	TRUE	FALSE	FALSE	0.0347206	NA	FALSE
ENSMUSG00000036545	Adamts2	11	50602084	1	11 B1.3	NA	misc_11	P	TRUE	FALSE	FALSE	0.0170854	NA	FALSE
ENSMUSG00000039963	Ccdc40	11	119228572	1	11 E2	NA	misc_11	P	TRUE	TRUE	FALSE	-0.000529829	NA	FALSE
ENSMUSG00000020634	Ubxn2a	12	4879032	-1	NA	NA	prox_12	P	TRUE	FALSE	FALSE	0.0072788	NA	FALSE
ENSMUSG00000015143	Actn1	12	80167547	-1	12 C3	NA	misc_12	P	TRUE	FALSE	FALSE	0.00641443	NA	FALSE
ENSMUSG00000021266	Wars	12	108860030	-1	12 F1	NA	dist_12	P	TRUE	FALSE	FALSE	-0.0426331	NA	FALSE
ENSMUSG00000017843	Ppp2r5c	12	110447120	1	12 F1	NA	dist_12	P	TRUE	FALSE	FALSE	0.0100313	NA	FALSE
ENSMUSG00000018707	Dync1h1	12	110601452	1	12 F1	NA	dist_12	P	TRUE	FALSE	FALSE	-0.00762502	NA	FALSE
ENSMUSG00000016477	E2f3	13	29906575	-1	13 A3.2	NA	cent_13	P	TRUE	FALSE	FALSE	-0.0181514	NA	FALSE
ENSMUSG00000041773	Enc1	13	97241105	1	13 D1	NA	dist_13	P	TRUE	FALSE	FALSE	-0.0020093	NA	FALSE
ENSMUSG00000015441	Gzmf	14	56205263	-1	NA	NA	prox_14	M	TRUE	TRUE	FALSE	0	NA	FALSE
ENSMUSG00000022139	Mbnl2	14	120275669	1	14 E4	NA	misc_14	P	TRUE	FALSE	FALSE	0.00710139	NA	FALSE
ENSMUSG00000047921	Trappc9	15	72589620	-1	15 D3	NA	cent_15	isoform-specific	TRUE	FALSE	FALSE	0.000799289	NA	FALSE
ENSMUSG00000000489	Pdgfb	15	79995874	-1	15 E1	NA	cent_15	P	TRUE	FALSE	FALSE	0.00501239	NA	FALSE
ENSMUSG00000023169	Slc38a1	15	96571418	-1	15 F1	NA	misc_15	P	TRUE	FALSE	FALSE	-0.0112455	NA	FALSE
ENSMUSG00000022462	Slc38a2	15	96687392	-1	15 F1	NA	misc_15	P	TRUE	FALSE	FALSE	-0.0289578	NA	FALSE
ENSMUSG00000022641	Bbx	16	50191844	-1	16 B5	NA	cent_16	P	TRUE	FALSE	FALSE	0.0167189	NA	FALSE
ENSMUSG00000022639	Dubr	16	50719294	-1	NA	NA	cent_16	P	TRUE	FALSE	FALSE	0.0166364	NA	FALSE
ENSMUSG00000062078	Qk	17	10202601	-1	17 A1	NA	prox_17	M	TRUE	FALSE	FALSE	-0.00997698	NA	FALSE
ENSMUSG00000073460	Pnldc1	17	12888902	-1	NA	NA	prox_17	M	TRUE	TRUE	FALSE	0.0380609	NA	FALSE
ENSMUSG00000024140	Epas1	17	86753700	1	17 E4	NA	cent_17	P	TRUE	FALSE	FALSE	-0.0112527	NA	FALSE
ENSMUSG00000044906	4930503L19Rik	18	70452212	-1	NA	NA	misc_18	P	TRUE	FALSE	FALSE	0.037346	NA	FALSE
ENSMUSG00000048720	Tbc1d12	19	38836579	1	19 C3	NA	cent_19	P	TRUE	FALSE	FALSE	0.00965482	NA	FALSE
ENSMUSG00000026358	Rgs1	1	144242296	-1	NA	NA	misc_1	M	FALSE	NA	FALSE	NA	NA	NA
ENSMUSG00000026471	Mr1	1	155127277	-1	1 G3	NA	misc_1	M	TRUE	FALSE	FALSE	-0.241491	NA	NA
ENSMUSG00000026581	Sell	1	164061982	1	NA	NA	misc_1	M	FALSE	NA	FALSE	NA	NA	NA
ENSMUSG00000073494	Sh2d1b2	1	170232749	1	NA	NA	misc_1	M	FALSE	NA	FALSE	NA	NA	NA
ENSMUSG00000038421	Fcrla	1	170917576	-1	NA	NA	misc_1	M	FALSE	NA	FALSE	NA	NA	NA
NA	Zdbf2linc	1	NA	NA	1 C2	GPR1	cent_1	P	FALSE	NA	FALSE	NA	NA	NA
NA	XLOC_047844	2	10308628	-1	2	NA	prox_2	P	FALSE	NA	FALSE	NA	NA	NA
ENSMUSG00000026770	Il2ra	2	11642807	1	NA	NA	prox_2	M	FALSE	NA	FALSE	NA	NA	NA
ENSMUSG00000087701	Gm13493	2	51871126	-1	NA	NA	prox_2	M	TRUE	TRUE	FALSE	NaN	NA	NA
ENSMUSG00000040093	Bmf	2	118528757	-1	NA	NA	prox_2	M	TRUE	FALSE	FALSE	0.162283	NA	NA
ENSMUSG00000068129	Cst7	2	150570415	1	NA	NA	dist_2	M	FALSE	NA	FALSE	NA	NA	NA
ENSMUSG00000067786	Nnat	2	157560078	1	2 H1	NA	dist_2	P	TRUE	TRUE	FALSE	NaN	NA	NA
ENSMUSG00000074622	Mafb	2	160363703	-1	2 H2	NA	dist_2	M	TRUE	FALSE	FALSE	0.101401	NA	NA
ENSMUSG00000065521	Mir296	2	174267047	-1	2 H4	Gnas	dist_2	P	FALSE	NA	FALSE	NA	NA	NA
ENSMUSG00000065410	Mir298	2	174267504	-1	2 H4	Gnas	dist_2	P	FALSE	NA	FALSE	NA	NA	NA
ENSMUSG00000086537	Nespas	2	174281237	-1	2 H4	Gnas	dist_2	P	TRUE	TRUE	FALSE	0.208333	NA	NA
ENSMUSG00000027524	Edn3	2	174760619	1	2 H4	Gnas	dist_2	P	FALSE	NA	FALSE	NA	NA	NA
NA	NESP55	2	NA	NA	2 H4	Gnas	dist_2	M	FALSE	NA	FALSE	NA	NA	NA
NA	GNASXL	2	NA	NA	2 H4	Gnas	dist_2	P	FALSE	NA	FALSE	NA	NA	NA
NA	Exon-1A	2	NA	NA	2 H4	Gnas	dist_2	P	FALSE	NA	FALSE	NA	NA	NA
NA	GS-alpha	2	NA	NA	2 H4	Gnas	dist_2	M	FALSE	NA	FALSE	NA	NA	NA
NA	F7	2	NA	NA	2 H4	Gnas	dist_2	M	FALSE	NA	FALSE	NA	NA	NA
ENSMUSG00000001865	Cpa3	3	20215620	-1	NA	NA	misc_3	M	FALSE	NA	FALSE	NA	NA	NA
ENSMUSG00000105260	Gm40040	3	41477577	-1	NA	NA	cent_3	P	TRUE	FALSE	FALSE	0.0670638	NA	NA
ENSMUSG00000106223	2400006e01Rik	3	41521247	-1	3 B	NA	cent_3	P	TRUE	TRUE	FALSE	-0.113418	NA	NA
ENSMUSG00000027955	Gask1b	3	79884533	1	3 E3	NA	misc_3	P	TRUE	FALSE	FALSE	-0.0727427	NA	NA
ENSMUSG00000028078	Dclk2	3	86786151	-1	NA	NA	misc_3	M	TRUE	FALSE	FALSE	0.0553486	NA	NA
ENSMUSG00000037221	Mospd3	5	137596645	-1	5 G2	NA	misc_5	P	TRUE	FALSE	FALSE	-0.0543569	NA	NA
ENSMUSG00000097287	D130017N08Rik	5	143758354	1	5 G2	NA	misc_5	P	FALSE	NA	FALSE	NA	NA	NA
ENSMUSG00000042817	Flt3	5	147330741	-1	NA	NA	misc_5	P	TRUE	FALSE	FALSE	NA	NA	NA
ENSMUSG00000023964	Calcr	6	3685680	-1	6 A1	NA	prox_6	M	FALSE	NA	FALSE	NA	NA	NA
ENSMUSG00000029664	Tfpi2	6	3962595	-1	6 A1	NA	prox_6	M	TRUE	FALSE	FALSE	0.485398	NA	NA
ENSMUSG00000065501	Mir335	6	30741299	1	6 A3	NA	prox_6	P	FALSE	NA	FALSE	NA	NA	NA
ENSMUSG00000039032	Tsga13	6	30896981	-1	6 A3.3	NA	prox_6	M	FALSE	NA	FALSE	NA	NA	NA
ENSMUSG00000076490	Trbc1	6	41538218	1	NA	NA	prox_6	M	FALSE	NA	FALSE	NA	NA	NA
ENSMUSG00000055430	Nap1l5	6	58905233	-1	6 C1	NA	prox_6	P	FALSE	NA	FALSE	NA	NA	NA
ENSMUSG00000025889	Snca	6	60731575	-1	NA	NA	prox_6	M	TRUE	FALSE	FALSE	-0.0504906	NA	NA
ENSMUSG00000030114	Klrg1	6	122270596	-1	NA	NA	dist_6	M	FALSE	NA	FALSE	NA	NA	NA
ENSMUSG00000108090	Gm6637	6	122295664	1	NA	NA	dist_6	M	FALSE	NA	FALSE	NA	NA	NA
ENSMUSG00000030199	Etv6	6	134035700	1	6 G1	NA	dist_6	P	TRUE	FALSE	FALSE	-0.0629181	NA	NA
NA	Copg2os1	6	NA	NA	6 A3	NA	prox_6	P	FALSE	NA	FALSE	NA	NA	NA
ENSMUSG00000108113	Zim2	7	6651748	-1	7 A2-B1	NA	prox_7	M	FALSE	NA	FALSE	NA	NA	NA
ENSMUSG00000108043	Zim3	7	6955685	-1	7 A2-B1	NA	prox_7	M	FALSE	NA	FALSE	NA	NA	NA
ENSMUSG00000109176	Zfp264	7	6977246	1	7 A2-B1	NA	prox_7	P	FALSE	NA	FALSE	NA	NA	NA
ENSMUSG00000030579	Tyrobp	7	30413760	1	NA	NA	misc_7	M	TRUE	FALSE	FALSE	0.0554346	NA	NA
ENSMUSG00000077191	Snord64	7	59978808	-1	7C-B5	SNURF-SNRPN	cent_7	P	FALSE	NA	FALSE	NA	NA	NA
ENSMUSG00000089375	Snord107	7	59980876	-1	7C-B5	SNURF-SNRPN	cent_7	P	FALSE	NA	FALSE	NA	NA	NA
ENSMUSG00000102627	Snurf	7	59995449	-1	7 C-B5	SNURF-SNRPN	cent_7	P	FALSE	NA	FALSE	NA	NA	NA
NA	XLOC_075991	7	60641818	-1	7	NA	cent_7	P	FALSE	NA	FALSE	NA	NA	NA
ENSMUSG00000109006	B230209E15Rik	7	61529871	-1	7 C-B5	NA	cent_7	P	FALSE	NA	FALSE	NA	NA	NA
ENSMUSG00000109394	A230057D06Rik	7	61704519	-1	7 C-B5	NA	cent_7	P	FALSE	NA	FALSE	NA	NA	NA
ENSMUSG00000109321	A330076H08Rik	7	61930137	-1	7 C-B5	NA	cent_7	P	FALSE	NA	FALSE	NA	NA	NA
ENSMUSG00000045813	Gm9801	7	62094506	-1	7 C-B5	NA	cent_7	P	FALSE	NA	FALSE	NA	NA	NA
ENSMUSG00000030638	Sh3gl3	7	82173840	1	7 D3	NA	misc_7	P	TRUE	FALSE	FALSE	-0.239744	NA	NA
ENSMUSG00000030724	Cd19	7	126408450	-1	NA	NA	distcent_7	M	FALSE	NA	FALSE	NA	NA	NA
ENSMUSG00000030782	Tgfb1i1	7	128246812	1	7 F3	NA	distcent_7	M	TRUE	FALSE	FALSE	NA	NA	NA
ENSMUSG00000030847	Bag3	7	128523616	1	7 F3	NA	distcent_7	M	TRUE	FALSE	FALSE	NA	NA	NA
ENSMUSG00000042105	Inpp5f	7	128611328	1	7 F3	NA	distcent_7	P	TRUE	FALSE	FALSE	NA	NA	NA
ENSMUSG00000045777	Ifitm10	7	142325837	-1	7 F5	NA	dist_7	M	TRUE	FALSE	FALSE	NA	NA	NA
ENSMUSG00000018819	Lsp1	7	142460809	1	7 F5	NA	dist_7	M	TRUE	FALSE	FALSE	NA	NA	NA
ENSMUSG00000087090	Nctc1	7	142544609	-1	7 F5	NA	dist_7	P	FALSE	NA	FALSE	NA	NA	NA
ENSMUSG00000000031	H19	7	142575529	-1	7 F5	NA	dist_7	M	TRUE	TRUE	FALSE	NA	NA	NA
ENSMUSG00000048583	Igf2	7	142650766	-1	7 F5	NA	dist_7	P	TRUE	TRUE	FALSE	NA	NA	NA
ENSMUSG00000086266	Igf2os	7	142659693	1	7 F5	NA	dist_7	P	TRUE	TRUE	FALSE	NA	NA	NA
ENSMUSG00000000215	Ins2	7	142678656	-1	7 F5	NA	dist_7	P	FALSE	NA	FALSE	NA	NA	NA
ENSMUSG00000000214	Th	7	142892752	-1	7 F5	NA	dist_7	M	TRUE	FALSE	FALSE	NA	NA	NA
ENSMUSG00000009248	Ascl2	7	142966829	-1	7 F5	NA	dist_7	M	TRUE	TRUE	FALSE	NA	NA	NA
ENSMUSG00000059277	R74862	7	143021784	-1	7 F5	NA	dist_7	M	FALSE	NA	FALSE	NA	NA	NA
ENSMUSG00000037706	Cd81	7	143052739	1	7 F5	NA	dist_7	M	TRUE	FALSE	FALSE	NA	NA	NA
ENSMUSG00000045752	Tssc4	7	143069249	1	7 F5	NA	dist_7	M	TRUE	TRUE	FALSE	NA	NA	NA
ENSMUSG00000009545	Kcnq1	7	143106362	1	7 F5	NA	dist_7	M	TRUE	TRUE	FALSE	NA	NA	NA
ENSMUSG00000101609	Kcnq1ot1	7	143203458	-1	7 F5	NA	dist_7	P	TRUE	TRUE	FALSE	NA	NA	NA
ENSMUSG00000037664	Cdkn1c	7	143458339	-1	7 F5	NA	dist_7	M	TRUE	TRUE	FALSE	NA	NA	NA
NA	AF313042	7	143462528	NA	7 F5	NA	dist_7	M	FALSE	NA	FALSE	NA	NA	NA
ENSMUSG00000000154	Slc22a18	7	143473736	1	7 F5	NA	dist_7	M	TRUE	TRUE	FALSE	NA	NA	NA
ENSMUSG00000010760	Phlda2	7	143501545	-1	7 F5	NA	dist_7	M	TRUE	TRUE	FALSE	NA	NA	NA
ENSMUSG00000059119	Nap1l4	7	143513579	-1	7 F5	NA	dist_7	M	TRUE	FALSE	FALSE	NA	NA	NA
ENSMUSG00000045362	Tnfrsf26	7	143607659	-1	7 F5	NA	dist_7	M	TRUE	TRUE	FALSE	NA	NA	NA
ENSMUSG00000109251	E230032D23Rik	7	143628024	1	7	NA	dist_7	M	FALSE	NA	FALSE	NA	NA	NA
ENSMUSG00000010751	Tnfrsf22	7	143634806	-1	7 F5	NA	dist_7	M	TRUE	TRUE	FALSE	NA	NA	NA
ENSMUSG00000037613	Tnfrsf23	7	143665809	-1	7 F5	NA	dist_7	M	TRUE	TRUE	FALSE	NA	NA	NA
ENSMUSG00000037606	Osbpl5	7	143688762	-1	7 F5	NA	dist_7	M	TRUE	TRUE	FALSE	NA	NA	NA
ENSMUSG00000031075	Ano1	7	144588549	-1	7 F5	NA	dist_7	M	TRUE	TRUE	FALSE	NA	NA	NA
NA	Peg3os	7	NA	NA	7 A1	NA	prox_7	P	FALSE	NA	FALSE	NA	NA	NA
NA	Mkrn3os	7	NA	NA	7C-B5	NA	cent_7	P	FALSE	NA	FALSE	NA	NA	NA
NA	BM117114	7	NA	NA	7C-B5	NA	cent_7	P	FALSE	NA	FALSE	NA	NA	NA
NA	Pec2	7	NA	NA	7C-B5	NA	cent_7	P	FALSE	NA	FALSE	NA	NA	NA
NA	BB077283	7	NA	NA	7C-B5	NA	cent_7	P	FALSE	NA	FALSE	NA	NA	NA
NA	Pec3	7	NA	NA	7C-B5	NA	cent_7	P	FALSE	NA	FALSE	NA	NA	NA
NA	Snord116_cluster	7	NA	NA	7C-B5	pwcr1	cent_7	P	FALSE	NA	FALSE	NA	NA	NA
NA	Snord115_cluster	7	NA	NA	7C-B5	pwcr1	cent_7	P	FALSE	NA	FALSE	NA	NA	NA
NA	U80893	7	NA	NA	7C-B5	NA	cent_7	P	FALSE	NA	FALSE	NA	NA	NA
NA	PIHit	7	NA	NA	7 F5	NA	dist_7	P	FALSE	NA	FALSE	NA	NA	NA
NA	Tsci1	8	80859408	1	8	NA	misc_8	P	FALSE	NA	FALSE	NA	NA	NA
ENSMUSG00000032094	Cd3d	9	44981786	1	NA	NA	misc_9	M	FALSE	NA	FALSE	NA	NA	NA
ENSMUSG00000065596	Mir184	9	89802260	-1	9 E3.1	NA	dist_9	P	FALSE	NA	FALSE	NA	NA	NA
ENSMUSG00000098627	4930524O08Rik	9	89826519	1	9 E3.1	NA	dist_9	P	FALSE	NA	FALSE	NA	NA	NA
ENSMUSG00000032454	Rbp2	9	98486115	1	9 E3.3	NA	dist_9	P	TRUE	TRUE	FALSE	0.0553632	NA	NA
NA	AS4	9	NA	1	9 E3.1	NA	dist_9	P	FALSE	NA	FALSE	NA	NA	NA
ENSMUSG00000025383	Il23a	10	128296139	-1	NA	NA	dist_10	M	FALSE	NA	FALSE	NA	NA	NA
ENSMUSG00000025348	Itga7	10	128933818	1	NA	NA	dist_10	M	TRUE	FALSE	FALSE	0.126727	NA	NA
NA	XLOC_011039	11	12037523	1	11	NA	misc_11	M	FALSE	NA	FALSE	NA	NA	NA
NA	Tsci2	11	12151320	1	11	NA	misc_11	M	FALSE	NA	FALSE	NA	NA	NA
ENSMUSG00000020173	Cobl	11	12236608	-1	11 A1	NA	prox_11	M	TRUE	FALSE	FALSE	-0.123746	NA	NA
ENSMUSG00000051355	Commd1	11	22896136	-1	11 A3	NA	prox_11	isoform-specific	TRUE	FALSE	FALSE	0.12876	NA	NA
ENSMUSG00000020399	Havcr2	11	46454935	1	NA	NA	misc_11	M	FALSE	NA	FALSE	NA	NA	NA
ENSMUSG00000061469	Gm12569	11	51220473	1	11 B1.3	NA	misc_11	P	TRUE	FALSE	FALSE	-0.106672	NA	NA
ENSMUSG00000035112	Wnk4	11	101260567	1	11 D	NA	misc_11	M	TRUE	FALSE	FALSE	0.0739736	NA	NA
ENSMUSG00000066632	Pgk1-rs7	12	10898986	-1	NA	NA	misc_12	M	FALSE	NA	FALSE	NA	NA	NA
ENSMUSG00000112546	Gm6992	12	31018218	1	NA	NA	misc_12	P	FALSE	NA	FALSE	NA	NA	NA
NA	Tsci4	12	81007809	-1	12	NA	misc_12	P	FALSE	NA	FALSE	NA	NA	NA
ENSMUSG00000047415	Gpr68	12	100876682	-1	12 F1	NA	dist_12	M	FALSE	NA	FALSE	NA	NA	NA
ENSMUSG00000040867	Begain	12	109032187	-1	12 F1	NA	dist_12	P	FALSE	NA	FALSE	NA	NA	NA
ENSMUSG00000112977	Gm34081	12	109493529	-1	12	NA	dist_12	M	FALSE	NA	FALSE	NA	NA	NA
ENSMUSG00000065526	Mir337	12	109585789	1	12 F1	NA	dist_12	M	FALSE	NA	FALSE	NA	NA	NA
ENSMUSG00000070080	Mir431	12	109590447	1	12 F1	anti-Rtl1	dist_12	M	FALSE	NA	FALSE	NA	NA	NA
ENSMUSG00000070072	Mir433	12	109591715	1	12 F1	anti-Rtl1	dist_12	M	FALSE	NA	FALSE	NA	NA	NA
ENSMUSG00000070076	Mir127	12	109592846	1	12 F1	anti-Rtl1	dist_12	M	FALSE	NA	FALSE	NA	NA	NA
ENSMUSG00000070133	Mir434	12	109594506	1	12 F1	anti-Rtl1	dist_12	M	FALSE	NA	FALSE	NA	NA	NA
ENSMUSG00000087855	Mir432	12	109594956	1	12 F1	anti-Rtl1	dist_12	M	FALSE	NA	FALSE	NA	NA	NA
ENSMUSG00000104858	Mir136	12	109595327	1	12 F1	anti-Rtl1	dist_12	M	FALSE	NA	FALSE	NA	NA	NA
ENSMUSG00000065433	Mir370	12	109618258	1	12 F1	Rian	dist_12	M	FALSE	NA	FALSE	NA	NA	NA
ENSMUSG00000088294	AF357425	12	109636012	1	12 F1	Rian	dist_12	M	FALSE	NA	FALSE	NA	NA	NA
NA	AF357426	12	109642838	1	12 F1	Rian	dist_12	M	FALSE	NA	FALSE	NA	NA	NA
NA	AF357359	12	109650709	1	12 F1	Rian	dist_12	M	FALSE	NA	FALSE	NA	NA	NA
ENSMUSG00000064621	Gm26922	12	109654627	1	12 F1	Rian	dist_12	M	FALSE	NA	FALSE	NA	NA	NA
ENSMUSG00000065749	AF357428	12	109679945	1	12 F1	Rian	dist_12	M	FALSE	NA	FALSE	NA	NA	NA
ENSMUSG00000065022	AF357341	12	109681519	1	12 F1	Rian	dist_12	M	FALSE	NA	FALSE	NA	NA	NA
ENSMUSG00000065477	Mir411	12	109710175	1	12 F1	Mirg	dist_12	M	FALSE	NA	FALSE	NA	NA	NA
ENSMUSG00000104582	Mir380	12	109711803	1	12 F1	Mirg	dist_12	M	FALSE	NA	FALSE	NA	NA	NA
ENSMUSG00000105853	Mir376b	12	109723458	1	12 F1	Mirg	dist_12	M	FALSE	NA	FALSE	NA	NA	NA
ENSMUSG00000065426	Mir134	12	109734139	1	12 F1	Mirg	dist_12	M	FALSE	NA	FALSE	NA	NA	NA
ENSMUSG00000065448	Mir154	12	109738433	1	12 F1	Mirg	dist_12	M	FALSE	NA	FALSE	NA	NA	NA
ENSMUSG00000065497	Mir410	12	109743715	1	12 F1	Mirg	dist_12	M	FALSE	NA	FALSE	NA	NA	NA
ENSMUSG00000104213	Ighd	12	113406604	-1	NA	NA	dist_12	M	FALSE	NA	FALSE	NA	NA	NA
NA	DLK1 downstream transcripts	12	NA	NA	12 F1	NA	NA	P	FALSE	NA	FALSE	NA	NA	NA
NA	Mico1	12	NA	NA	12 F1	NA	NA	M	FALSE	NA	FALSE	NA	NA	NA
NA	Mico1os	12	NA	NA	12 F1	NA	NA	M	FALSE	NA	FALSE	NA	NA	NA
NA	anti-Rtl1	12	NA	NA	12 F1	anti-Rtl1	dist_12	M	FALSE	NA	FALSE	NA	NA	NA
ENSMUSG00000053101	Gpr141	13	19749682	-1	NA	NA	misc_13	M	FALSE	NA	FALSE	NA	NA	NA
ENSMUSG00000044231	Nhlrc1	13	47012557	-1	13 A5	NA	cent_13	P	TRUE	TRUE	FALSE	0.0523693	NA	NA
ENSMUSG00000047842	Diras2	13	52504380	-1	NA	NA	cent_13	M	TRUE	FALSE	FALSE	0.111644	NA	NA
ENSMUSG00000046082	Tmem174	13	98634978	-1	13 D1	NA	dist_13	P	FALSE	NA	FALSE	NA	NA	NA
ENSMUSG00000021699	Pde4d	13	108449948	1	13 D2	NA	dist_13	P	TRUE	FALSE	FALSE	-0.0706413	NA	NA
ENSMUSG00000021848	Otx2	14	48657677	-1	14 C1	NA	prox_14	P	FALSE	NA	FALSE	NA	NA	NA
ENSMUSG00000098682	Otx2os1	14	48668708	1	14 C1	NA	prox_14	P	FALSE	NA	FALSE	NA	NA	NA
ENSMUSG00000040314	Ctsg	14	56099881	-1	NA	NA	prox_14	M	FALSE	NA	FALSE	NA	NA	NA
ENSMUSG00000033470	Cysltr2	14	73025603	-1	NA	NA	cent_14	M	FALSE	NA	FALSE	NA	NA	NA
ENSMUSG00000034997	Htr2a	14	74640840	1	14 D2	NA	cent_14	M	FALSE	NA	FALSE	NA	NA	NA
ENSMUSG00000061517	Sox21	14	118233232	-1	14 E4	NA	misc_14	P	TRUE	FALSE	FALSE	0.0764227	NA	NA
ENSMUSG00000036760	Kcnk9	15	72501089	-1	15 D3	NA	cent_15	M	FALSE	NA	FALSE	NA	NA	NA
ENSMUSG00000068391	Chrac1	15	73090392	1	15 D3	NA	cent_15	M	TRUE	FALSE	FALSE	-0.115627	NA	NA
ENSMUSG00000116295	Gm32885	15	97157029	-1	15	NA	misc_15	P	FALSE	NA	FALSE	NA	NA	NA
ENSMUSG00000037280	Galnt6	15	100691813	-1	15 F1	NA	misc_15	P	TRUE	FALSE	FALSE	-0.204558	NA	NA
ENSMUSG00000022657	Cd96	16	46035657	-1	NA	NA	cent_16	M	FALSE	NA	FALSE	NA	NA	NA
ENSMUSG00000022651	Retnlg	16	48872621	1	NA	NA	cent_16	M	FALSE	NA	FALSE	NA	NA	NA
ENSMUSG00000022952	Runx1	16	92601466	-1	16 C4	NA	misc_16	P	TRUE	FALSE	FALSE	0.239646	NA	NA
NA	XLOC_037414	17	4983739	-1	17	NA	prox_17	M	FALSE	NA	FALSE	NA	NA	NA
ENSMUSG00000023873	1700010I14Rik	17	8988333	1	17 A1	NA	prox_17	M	FALSE	NA	FALSE	NA	NA	NA
ENSMUSG00000037196	Pacrg	17	10403012	-1	17 A1	NA	prox_17	M	FALSE	NA	FALSE	NA	NA	NA
NA	XLOC_037615	17	12356364	-1	17	NA	prox_17	M	FALSE	NA	FALSE	NA	NA	NA
ENSMUSG00000040966	Slc22a2	17	12584132	1	17 A1	NA	prox_17	M	FALSE	NA	FALSE	NA	NA	NA
ENSMUSG00000089769	Gm16574	17	12818793	1	NA	NA	prox_17	P	FALSE	NA	FALSE	NA	NA	NA
ENSMUSG00000067049	Unc93a	17	13108617	-1	NA	NA	prox_17	M	FALSE	NA	FALSE	NA	NA	NA
NA	CrossFirre	17	NA	NA	X A5	NA	NA	M	FALSE	NA	FALSE	NA	NA	NA
ENSMUSG00000043458	Pcdhb12	18	37435621	1	18 B3	NA	misc_18	M	FALSE	NA	FALSE	NA	NA	NA
ENSMUSG00000075010	AW112010	19	11047617	-1	NA	NA	misc_19	M	TRUE	TRUE	FALSE	NA	NA	NA
ENSMUSG00000024673	Ms4a1	19	11249675	-1	NA	NA	misc_19	M	FALSE	NA	FALSE	NA	NA	NA
ENSMUSG00000052387	Trpm3	19	22139119	1	NA	NA	misc_19	M	FALSE	NA	FALSE	NA	NA	NA
ENSMUSG00000089679	Gm16299	19	53819354	-1	19 D2	NA	cent_19	P	FALSE	NA	FALSE	NA	NA	NA
ENSMUSG00000095180	Rhox5	X	37804842	1	X A3.3	NA	cent_X	M	FALSE	NA	FALSE	NA	NA	NA
ENSMUSG00000073125	Xlr3b	X	73192207	1	X A7	NA	dist_X	M	FALSE	NA	FALSE	NA	NA	NA
ENSMUSG00000067768	Xlr4b	X	73214333	1	X A7	NA	dist_X	M	FALSE	NA	FALSE	NA	NA	NA
ENSMUSG00000031362	Xlr4c	X	73233688	-1	X A7	NA	dist_X	M	FALSE	NA	FALSE	NA	NA	NA
ENSMUSG00000085715	Tsix	X	103431517	1	X D	NA	dist_X	P	FALSE	NA	FALSE	NA	NA	NA
ENSMUSG00000086503	Xist	X	103460366	-1	X D	NA	dist_X	P	FALSE	NA	FALSE	NA	NA	NA
ENSMUSG00000097571	Jpx	X	103493556	1	X D	NA	dist_X	P	FALSE	NA	FALSE	NA	NA	NA
ENSMUSG00000086370	Ftx	X	103560907	-1	X D	NA	dist_X	M	FALSE	NA	FALSE	NA	NA	NA
ENSMUSG00000031330	Zcchc13	X	103630586	1	X D	NA	dist_X	M	FALSE	NA	FALSE	NA	NA	NA

## Sheet: E14.5_matzyg_matzygvsmat
Supplementary file 1i. Differential imprinted expression in male E14.5 B6(CastB6) placentae, Smchd1 matzygΔ vs matΔ. A gene is called differentiallly imprinted if the multiple-testing corrected p-value is below 0.05 and the absolute difference in silent allele proportion greater than 0.05
ensembl_gene_id	gene	chromosome_name	start_position	strand	location	locus	cluster	expressed_allele	expressed	imprinted	sufficient_counts	zygoo_minus_oo	padj	diff_imprinted
ENSMUSG00000056972	Magel2	7	62377010	1	7 C-B5	NA	cent_7	P	TRUE	TRUE	TRUE	0.276397	5.55761e-08	TRUE
ENSMUSG00000061186	Sfmbt2	2	10370510	1	2 A1	NA	prox_2	P	TRUE	TRUE	TRUE	0.195273	6.82356e-08	TRUE
ENSMUSG00000002265	Peg3	7	6703892	-1	7 A2-B1	NA	prox_7	P	TRUE	TRUE	TRUE	-0.314703	9.96641e-08	TRUE
ENSMUSG00000051855	Mest	6	30723547	1	6 A3	NA	prox_6	isoform-specific	TRUE	TRUE	TRUE	-0.118609	1.3023e-05	TRUE
ENSMUSG00000045752	Tssc4	7	143069249	1	7 F5	NA	dist_7	M	TRUE	TRUE	TRUE	0.259676	0.0001327	TRUE
ENSMUSG00000028339	Col15a1	4	47208161	1	NA	NA	misc_4	M	TRUE	TRUE	TRUE	0.151944	0.00589686	TRUE
ENSMUSG00000027551	Zfp64	2	168893331	-1	2 H3	NA	dist_2	P	TRUE	TRUE	TRUE	-0.128927	0.0313583	TRUE
ENSMUSG00000028859	Csf3r	4	126024550	1	NA	NA	misc_4	M	TRUE	TRUE	TRUE	0.147202	0.11453	FALSE
ENSMUSG00000022464	Slc38a4	15	96994820	-1	15 F1	NA	misc_15	P	TRUE	TRUE	TRUE	-0.123887	0.122052	FALSE
ENSMUSG00000024423	Impact	18	12955852	1	18 A2-B2	NA	cent_18	P	TRUE	TRUE	TRUE	-0.0794683	0.206066	FALSE
ENSMUSG00000086748	Gm13261	2	10339283	-1	NA	NA	prox_2	P	TRUE	TRUE	TRUE	0.164599	0.245324	FALSE
ENSMUSG00000033585	Ndn	7	62346569	1	7 C-B5	NA	cent_7	P	TRUE	TRUE	TRUE	0.135643	0.245324	FALSE
ENSMUSG00000009248	Ascl2	7	142966829	-1	7 F5	NA	dist_7	M	TRUE	TRUE	TRUE	0.105021	0.245324	FALSE
ENSMUSG00000019814	Ltv1	10	13178140	-1	NA	NA	cent_10	M	TRUE	TRUE	TRUE	-0.0799787	0.245324	FALSE
ENSMUSG00000037664	Cdkn1c	7	143458339	-1	7 F5	NA	dist_7	M	TRUE	TRUE	TRUE	0.0295142	0.330201	FALSE
ENSMUSG00000059256	Gzmd	14	56129556	-1	NA	NA	prox_14	M	TRUE	TRUE	TRUE	-0.0361676	0.353685	FALSE
ENSMUSG00000027520	Zdbf2	1	63273265	1	1 C2	GPR1	cent_1	P	TRUE	TRUE	TRUE	-0.0609496	0.426688	FALSE
ENSMUSG00000025764	Jade1	3	41555731	1	3 B	NA	cent_3	P	TRUE	TRUE	TRUE	0.063027	0.480555	FALSE
ENSMUSG00000051527	Usp29	7	6730578	1	7 A2-B1	NA	prox_7	P	TRUE	TRUE	TRUE	-0.0750021	0.480555	FALSE
ENSMUSG00000010760	Phlda2	7	143501545	-1	7 F5	NA	dist_7	M	TRUE	TRUE	TRUE	0.0994745	0.480555	FALSE
ENSMUSG00000045362	Tnfrsf26	7	143607659	-1	7 F5	NA	dist_7	M	TRUE	TRUE	TRUE	0.110352	0.505419	FALSE
ENSMUSG00000062866	Phactr2	10	13207717	-1	10 A1	NA	cent_10	M	TRUE	TRUE	TRUE	0.0606127	0.505419	FALSE
ENSMUSG00000082536	Gm13456	2	40555752	1	NA	NA	prox_2	M	TRUE	TRUE	TRUE	0.00839462	0.597774	FALSE
ENSMUSG00000028581	Laptm5	4	130913125	1	NA	NA	misc_4	M	TRUE	TRUE	TRUE	0.0682953	0.643613	FALSE
ENSMUSG00000037606	Osbpl5	7	143688762	-1	7 F5	NA	dist_7	M	TRUE	TRUE	TRUE	0.0789125	0.79612	FALSE
ENSMUSG00000018259	Prl8a2	13	27345673	1	NA	NA	cent_13	M	TRUE	TRUE	TRUE	-0.217235	0.79612	FALSE
ENSMUSG00000025607	Copg2	6	30747554	-1	6 A3	NA	prox_6	M	TRUE	TRUE	TRUE	-0.0811945	0.799189	FALSE
ENSMUSG00000037613	Tnfrsf23	7	143665809	-1	7 F5	NA	dist_7	M	TRUE	TRUE	TRUE	0.0449633	0.835074	FALSE
ENSMUSG00000021268	Meg3	12	109541001	1	12 F1	NA	dist_12	M	TRUE	TRUE	TRUE	0.0109883	0.87138	FALSE
ENSMUSG00000081833	Gm13669	2	75808358	1	NA	NA	prox_2	M	TRUE	TRUE	TRUE	0.0551663	0.874445	FALSE
ENSMUSG00000042814	Mcts2	2	152687035	1	2 H1	NA	dist_2	P	TRUE	TRUE	TRUE	0.0276879	0.874445	FALSE
ENSMUSG00000097639	Platr4	3	41484024	-1	3 B	NA	cent_3	P	TRUE	TRUE	TRUE	-0.0370498	0.874445	FALSE
ENSMUSG00000056071	S100a9	3	90692632	-1	NA	NA	misc_3	M	TRUE	TRUE	TRUE	0.089616	0.874445	FALSE
ENSMUSG00000100826	Snhg14	7	59307924	-1	7 C-B5	NA	cent_7	P	TRUE	TRUE	TRUE	0.00808288	0.874445	FALSE
ENSMUSG00000070527	Mkrn3	7	62417593	-1	7 C-B5	NA	cent_7	P	TRUE	TRUE	TRUE	0.0788278	0.874445	FALSE
ENSMUSG00000086266	Igf2os	7	142659693	1	7 F5	NA	dist_7	P	TRUE	TRUE	TRUE	0.0112983	0.874445	FALSE
ENSMUSG00000009545	Kcnq1	7	143106362	1	7 F5	NA	dist_7	M	TRUE	TRUE	TRUE	0.096118	0.874445	FALSE
ENSMUSG00000101609	Kcnq1ot1	7	143203458	-1	7 F5	NA	dist_7	P	TRUE	TRUE	TRUE	0.00648102	0.874445	FALSE
ENSMUSG00000031075	Ano1	7	144588549	-1	7 F5	NA	dist_7	M	TRUE	TRUE	TRUE	0.0453449	0.874445	FALSE
ENSMUSG00000031714	Gab1	8	80764438	-1	8 C2	NA	misc_8	P	TRUE	TRUE	TRUE	0.0345904	0.874445	FALSE
ENSMUSG00000031962	Cdh15	8	122847966	1	8 E1	NA	misc_8	isoform-specific	TRUE	TRUE	TRUE	-0.05	0.874445	FALSE
ENSMUSG00000044068	Zrsr1	11	22972005	1	11 A3	NA	prox_11	P	TRUE	TRUE	TRUE	-0.0203519	0.874445	FALSE
ENSMUSG00000086646	Platr20	11	51189833	-1	11 B1.3	NA	misc_11	P	TRUE	TRUE	TRUE	0.0865195	0.874445	FALSE
ENSMUSG00000085860	2410003L11Rik	11	97598511	1	11 D	NA	misc_11	P	TRUE	TRUE	TRUE	0.111715	0.874445	FALSE
ENSMUSG00000097391	Mirg	12	109729764	1	12 F1	Mirg	dist_12	M	TRUE	TRUE	TRUE	0.0360114	0.874445	FALSE
ENSMUSG00000106847	Peg13	15	72805600	-1	15 D3	NA	cent_15	P	TRUE	TRUE	TRUE	-0.0248933	0.874445	FALSE
ENSMUSG00000097694	G730013B05Rik	16	50526245	1	16 B5	NA	cent_16	P	TRUE	TRUE	TRUE	0.0488537	0.874445	FALSE
ENSMUSG00000092035	Peg10	6	4747306	1	6 A1	NA	prox_6	P	TRUE	TRUE	TRUE	-0.0023279	0.885266	FALSE
ENSMUSG00000042607	Asb4	6	5383386	1	6 A1	NA	prox_6	M	TRUE	TRUE	TRUE	0.042305	0.885266	FALSE
ENSMUSG00000002266	Zim1	7	6671269	-1	7 A2-B1	NA	prox_7	M	TRUE	TRUE	TRUE	-0.00253327	0.885266	FALSE
ENSMUSG00000019817	Plagl1	10	13060504	1	10 A2	NA	cent_10	P	TRUE	TRUE	TRUE	-0.0118052	0.885266	FALSE
ENSMUSG00000021136	Smoc1	12	81026808	1	12 D1	NA	misc_12	P	TRUE	TRUE	TRUE	-0.0257245	0.885266	FALSE
ENSMUSG00000097451	Rian	12	109603940	1	12 F1	NA	dist_12	M	TRUE	TRUE	TRUE	0.00800339	0.885266	FALSE
ENSMUSG00000000154	Slc22a18	7	143473736	1	7 F5	NA	dist_7	M	TRUE	TRUE	TRUE	0.0213126	0.888547	FALSE
ENSMUSG00000102252	Snrpn	7	59982495	-1	7 C-B5	SNURF-SNRPN	cent_7	P	TRUE	TRUE	TRUE	0.00341936	0.893421	FALSE
ENSMUSG00000032827	Ppp1r9a	6	4902917	1	6 A1	NA	prox_6	M	TRUE	TRUE	TRUE	0.0250582	0.909707	FALSE
ENSMUSG00000016458	Wt1	2	105126529	1	2 E2-E3	NA	prox_2	M	TRUE	TRUE	TRUE	-0.0177679	0.914392	FALSE
ENSMUSG00000029775	Klhdc10	6	30401868	1	6 A3	NA	prox_6	M	TRUE	TRUE	TRUE	-0.0292642	0.914392	FALSE
ENSMUSG00000022156	Gzme	14	56117626	-1	NA	NA	prox_14	M	TRUE	TRUE	TRUE	-0.0122016	0.919318	FALSE
ENSMUSG00000029304	Spp1	5	104435118	1	NA	NA	misc_5	M	TRUE	TRUE	TRUE	0.0258579	0.958649	FALSE
ENSMUSG00000027523	Gnas	2	174284320	1	2 H4	Gnas	dist_2	M	TRUE	TRUE	TRUE	-0.0488571	0.974938	FALSE
ENSMUSG00000029096	Htra3	5	35652023	-1	5 B3	NA	prox_5	M	TRUE	TRUE	TRUE	0.0758858	0.974938	FALSE
ENSMUSG00000000948	Gm38393	7	59974149	-1	7 C-B5	NA	cent_7	P	TRUE	TRUE	TRUE	0.0209259	0.974938	FALSE
ENSMUSG00000070526	Peg12	7	62461871	-1	7 C-B5	NA	cent_7	P	TRUE	TRUE	TRUE	0.00034965	0.974938	FALSE
ENSMUSG00000043439	Epop	11	97627389	-1	NA	NA	misc_11	P	TRUE	TRUE	TRUE	0.0143656	0.974938	FALSE
ENSMUSG00000040284	Gzmg	14	56156582	-1	NA	NA	prox_14	M	TRUE	TRUE	TRUE	0.010101	0.974938	FALSE
ENSMUSG00000079186	Gzmc	14	56231441	-1	NA	NA	prox_14	M	TRUE	TRUE	TRUE	0	0.976221	FALSE
ENSMUSG00000004631	Sgce	6	4674350	-1	6 A1	NA	prox_6	P	TRUE	TRUE	TRUE	0.00801222	0.977162	FALSE
ENSMUSG00000032356	Rasgrf1	9	89909908	1	9 E3.1	NA	dist_9	P	TRUE	TRUE	TRUE	0.0732634	0.977162	FALSE
ENSMUSG00000045942	BC049762	11	51253651	-1	11 B1.3	NA	misc_11	P	TRUE	TRUE	TRUE	-0.0546053	0.977162	FALSE
ENSMUSG00000040856	Dlk1	12	109452823	1	12 F1	NA	dist_12	P	TRUE	TRUE	TRUE	-0.00253801	0.977162	FALSE
ENSMUSG00000024610	Cd74	18	60803848	1	NA	NA	misc_18	M	TRUE	TRUE	TRUE	0.00789148	0.977162	FALSE
ENSMUSG00000000031	H19	7	142575529	-1	7 F5	NA	dist_7	M	TRUE	TRUE	TRUE	-0.0180244	0.977604	FALSE
ENSMUSG00000020176	Grb10	11	11930508	-1	11 A1	NA	prox_11	isoform-specific	TRUE	TRUE	TRUE	0.00827436	0.977604	FALSE
ENSMUSG00000083219	Gm11410	4	80003989	1	NA	NA	misc_4	M	TRUE	TRUE	TRUE	0.0067201	0.980796	FALSE
ENSMUSG00000032359	Ctsh	9	90054152	1	9 E3.1	NA	dist_9	P	TRUE	TRUE	TRUE	-0.00675236	0.980796	FALSE
ENSMUSG00000019188	H13	2	152669461	1	2 H1	NA	dist_2	isoform-specific	TRUE	TRUE	TRUE	0.00487462	0.984746	FALSE
ENSMUSG00000040013	Fkbp6	5	135291704	-1	5 G2	NA	misc_5	P	TRUE	TRUE	TRUE	-0.00635621	0.984746	FALSE
ENSMUSG00000073209	Klf14	6	30956023	-1	6 A3	NA	prox_6	M	TRUE	TRUE	TRUE	0.00235294	0.984746	FALSE
ENSMUSG00000048583	Igf2	7	142650766	-1	7 F5	NA	dist_7	P	TRUE	TRUE	TRUE	-0.00236321	0.984746	FALSE
ENSMUSG00000037202	Prf1	10	61297833	1	NA	NA	mid_10	M	TRUE	TRUE	TRUE	0	0.984746	FALSE
ENSMUSG00000000290	Itgb2	10	77530252	1	NA	NA	mid_10	M	TRUE	TRUE	TRUE	0.0973214	0.984746	FALSE
ENSMUSG00000036698	Ago2	15	73095844	-1	15 D3	NA	cent_15	M	TRUE	TRUE	TRUE	-0.00679522	0.984746	FALSE
ENSMUSG00000026395	Ptprc	1	138062861	-1	NA	NA	misc_1	M	TRUE	TRUE	TRUE	0.00826535	0.998522	FALSE
ENSMUSG00000008999	Bmp7	2	172868012	-1	2 H3	NA	dist_2	P	TRUE	TRUE	TRUE	0.0486338	0.998522	FALSE
ENSMUSG00000087119	Atg4a-ps	3	103643954	-1	NA	NA	misc_3	M	TRUE	TRUE	TRUE	0	0.998522	FALSE
ENSMUSG00000085925	Rtl1	12	109589193	-1	12 F1	NA	dist_12	P	TRUE	TRUE	TRUE	-0.000343508	0.998522	FALSE
ENSMUSG00000075707	Dio3	12	110279068	1	12 F1	NA	dist_12	P	TRUE	TRUE	TRUE	0.0137876	0.998522	FALSE
ENSMUSG00000025967	Eef1b2	1	63176825	1	1 C2	GPR1	cent_1	P	TRUE	FALSE	FALSE	-0.00290199	NA	FALSE
ENSMUSG00000046856	Gpr1	1	63182691	-1	1 C2	GPR1	cent_1	P	TRUE	FALSE	FALSE	0.00332128	NA	FALSE
ENSMUSG00000025964	Adam23	1	63445891	1	1 C2	GPR1	cent_1	P	TRUE	FALSE	FALSE	0.0440915	NA	FALSE
ENSMUSG00000026470	Stx6	1	155158715	1	1 G3	NA	misc_1	M	TRUE	FALSE	FALSE	0.0176561	NA	FALSE
ENSMUSG00000033722	BC034090	1	155212471	-1	1 G3	NA	misc_1	M	TRUE	FALSE	FALSE	-0.0106386	NA	FALSE
ENSMUSG00000026970	Rbms1	2	60750193	-1	2 C1.2	NA	prox_2	P	TRUE	FALSE	FALSE	0.00254594	NA	FALSE
ENSMUSG00000009876	Cox4i2	2	152754173	1	2 H1	NA	dist_2	P	TRUE	FALSE	FALSE	-0.0286885	NA	FALSE
ENSMUSG00000007659	Bcl2l1	2	152780668	-1	2 H1	NA	dist_2	P	TRUE	FALSE	FALSE	0.0205577	NA	FALSE
ENSMUSG00000067787	Blcap	2	157556362	-1	2 H1	NA	dist_2	isoform-specific	TRUE	FALSE	FALSE	0.0187468	NA	FALSE
ENSMUSG00000039263	Npepl1	2	174110349	1	2 H4	NA	dist_2	M	TRUE	FALSE	FALSE	0.0157141	NA	FALSE
ENSMUSG00000105260	Gm40040	3	41477577	-1	NA	NA	cent_3	P	TRUE	FALSE	FALSE	0.0387187	NA	FALSE
ENSMUSG00000028078	Dclk2	3	86786151	-1	NA	NA	misc_3	M	TRUE	FALSE	FALSE	0.0419585	NA	FALSE
ENSMUSG00000037221	Mospd3	5	137596645	-1	5 G2	NA	misc_5	P	TRUE	FALSE	FALSE	0.031751	NA	FALSE
ENSMUSG00000042817	Flt3	5	147330741	-1	NA	NA	misc_5	P	TRUE	FALSE	FALSE	0.017378	NA	FALSE
ENSMUSG00000015189	Casd1	6	4600839	1	6 A1	NA	prox_6	M	TRUE	FALSE	FALSE	-0.0162706	NA	FALSE
ENSMUSG00000029804	Herc3	6	58831465	1	6 B3	NA	prox_6	isoform-specific	TRUE	FALSE	FALSE	-0.00178626	NA	FALSE
ENSMUSG00000025889	Snca	6	60731575	-1	NA	NA	prox_6	M	TRUE	FALSE	FALSE	-0.0100127	NA	FALSE
ENSMUSG00000030199	Etv6	6	134035700	1	6 G1	NA	dist_6	P	TRUE	FALSE	FALSE	-0.0362562	NA	FALSE
ENSMUSG00000002602	Axl	7	25757273	-1	7 A3-B1	NA	misc_7	M	TRUE	FALSE	FALSE	-0.00759601	NA	FALSE
ENSMUSG00000030579	Tyrobp	7	30413760	1	NA	NA	misc_7	M	TRUE	FALSE	FALSE	0.0195601	NA	FALSE
ENSMUSG00000025326	Ube3a	7	59228750	1	7 C-B5	NA	cent_7	M	TRUE	FALSE	FALSE	0.00603289	NA	FALSE
ENSMUSG00000030782	Tgfb1i1	7	128246812	1	7 F3	NA	distcent_7	M	TRUE	FALSE	FALSE	-0.038479	NA	FALSE
ENSMUSG00000030847	Bag3	7	128523616	1	7 F3	NA	distcent_7	M	TRUE	FALSE	FALSE	-0.00561636	NA	FALSE
ENSMUSG00000042105	Inpp5f	7	128611328	1	7 F3	NA	distcent_7	P	TRUE	FALSE	FALSE	-0.00296601	NA	FALSE
ENSMUSG00000045777	Ifitm10	7	142325837	-1	7 F5	NA	dist_7	M	TRUE	FALSE	FALSE	-0.0458939	NA	FALSE
ENSMUSG00000018819	Lsp1	7	142460809	1	7 F5	NA	dist_7	M	TRUE	FALSE	FALSE	-0.0186294	NA	FALSE
ENSMUSG00000037706	Cd81	7	143052739	1	7 F5	NA	dist_7	M	TRUE	FALSE	FALSE	0.029247	NA	FALSE
ENSMUSG00000059119	Nap1l4	7	143513579	-1	7 F5	NA	dist_7	M	TRUE	FALSE	FALSE	-0.00121429	NA	FALSE
ENSMUSG00000031665	Sall1	8	89027235	-1	NA	NA	misc_8	P	TRUE	FALSE	FALSE	-0.045098	NA	FALSE
ENSMUSG00000032422	Snx14	9	88376750	-1	9 E3.1	NA	dist_9	P	TRUE	FALSE	FALSE	0.0127545	NA	FALSE
ENSMUSG00000019795	Pcmt1	10	7629373	-1	10 A1	NA	misc_10	P	TRUE	FALSE	FALSE	0.0258887	NA	FALSE
ENSMUSG00000020173	Cobl	11	12236608	-1	11 A1	NA	prox_11	M	TRUE	FALSE	FALSE	0.0209681	NA	FALSE
ENSMUSG00000020634	Ubxn2a	12	4879032	-1	NA	NA	prox_12	P	TRUE	FALSE	FALSE	0.0276192	NA	FALSE
ENSMUSG00000015143	Actn1	12	80167547	-1	12 C3	NA	misc_12	P	TRUE	FALSE	FALSE	-2.70627e-05	NA	FALSE
ENSMUSG00000021266	Wars	12	108860030	-1	12 F1	NA	dist_12	P	TRUE	FALSE	FALSE	-0.0263767	NA	FALSE
ENSMUSG00000017843	Ppp2r5c	12	110447120	1	12 F1	NA	dist_12	P	TRUE	FALSE	FALSE	0.0182226	NA	FALSE
ENSMUSG00000018707	Dync1h1	12	110601452	1	12 F1	NA	dist_12	P	TRUE	FALSE	FALSE	-0.00740493	NA	FALSE
ENSMUSG00000016477	E2f3	13	29906575	-1	13 A3.2	NA	cent_13	P	TRUE	FALSE	FALSE	-0.0181721	NA	FALSE
ENSMUSG00000047842	Diras2	13	52504380	-1	NA	NA	cent_13	M	TRUE	FALSE	FALSE	-0.0229096	NA	FALSE
ENSMUSG00000041773	Enc1	13	97241105	1	13 D1	NA	dist_13	P	TRUE	FALSE	FALSE	-0.0198578	NA	FALSE
ENSMUSG00000015441	Gzmf	14	56205263	-1	NA	NA	prox_14	M	TRUE	TRUE	FALSE	0	NA	FALSE
ENSMUSG00000061517	Sox21	14	118233232	-1	14 E4	NA	misc_14	P	TRUE	FALSE	FALSE	-0.00035014	NA	FALSE
ENSMUSG00000022139	Mbnl2	14	120275669	1	14 E4	NA	misc_14	P	TRUE	FALSE	FALSE	0.0115398	NA	FALSE
ENSMUSG00000068391	Chrac1	15	73090392	1	15 D3	NA	cent_15	M	TRUE	FALSE	FALSE	0.0261234	NA	FALSE
ENSMUSG00000023169	Slc38a1	15	96571418	-1	15 F1	NA	misc_15	P	TRUE	FALSE	FALSE	-0.00301315	NA	FALSE
ENSMUSG00000022462	Slc38a2	15	96687392	-1	15 F1	NA	misc_15	P	TRUE	FALSE	FALSE	-0.00759425	NA	FALSE
ENSMUSG00000037280	Galnt6	15	100691813	-1	15 F1	NA	misc_15	P	TRUE	FALSE	FALSE	-0.0417087	NA	FALSE
ENSMUSG00000022641	Bbx	16	50191844	-1	16 B5	NA	cent_16	P	TRUE	FALSE	FALSE	0.00881957	NA	FALSE
ENSMUSG00000022639	Dubr	16	50719294	-1	NA	NA	cent_16	P	TRUE	FALSE	FALSE	0.0031564	NA	FALSE
ENSMUSG00000024140	Epas1	17	86753700	1	17 E4	NA	cent_17	P	TRUE	FALSE	FALSE	0.041197	NA	FALSE
ENSMUSG00000044906	4930503L19Rik	18	70452212	-1	NA	NA	misc_18	P	TRUE	FALSE	FALSE	0.017684	NA	FALSE
ENSMUSG00000026358	Rgs1	1	144242296	-1	NA	NA	misc_1	M	FALSE	NA	FALSE	NA	NA	NA
ENSMUSG00000026471	Mr1	1	155127277	-1	1 G3	NA	misc_1	M	TRUE	FALSE	FALSE	-0.257867	NA	NA
ENSMUSG00000026581	Sell	1	164061982	1	NA	NA	misc_1	M	FALSE	NA	FALSE	NA	NA	NA
ENSMUSG00000073494	Sh2d1b2	1	170232749	1	NA	NA	misc_1	M	FALSE	NA	FALSE	NA	NA	NA
ENSMUSG00000038421	Fcrla	1	170917576	-1	NA	NA	misc_1	M	FALSE	NA	FALSE	NA	NA	NA
NA	Zdbf2linc	1	NA	NA	1 C2	GPR1	cent_1	P	FALSE	NA	FALSE	NA	NA	NA
NA	XLOC_047844	2	10308628	-1	2	NA	prox_2	P	FALSE	NA	FALSE	NA	NA	NA
ENSMUSG00000026770	Il2ra	2	11642807	1	NA	NA	prox_2	M	FALSE	NA	FALSE	NA	NA	NA
ENSMUSG00000087701	Gm13493	2	51871126	-1	NA	NA	prox_2	M	TRUE	TRUE	FALSE	-0.833333	NA	NA
ENSMUSG00000040093	Bmf	2	118528757	-1	NA	NA	prox_2	M	TRUE	FALSE	FALSE	0.0598979	NA	NA
ENSMUSG00000068129	Cst7	2	150570415	1	NA	NA	dist_2	M	FALSE	NA	FALSE	NA	NA	NA
ENSMUSG00000042745	Id1	2	152736251	1	2 H1	NA	dist_2	P	TRUE	FALSE	FALSE	-0.052314	NA	NA
ENSMUSG00000027469	Tpx2	2	152847964	1	2 H1	NA	dist_2	P	TRUE	FALSE	FALSE	-0.0757563	NA	NA
ENSMUSG00000067786	Nnat	2	157560078	1	2 H1	NA	dist_2	P	TRUE	TRUE	FALSE	NaN	NA	NA
ENSMUSG00000074622	Mafb	2	160363703	-1	2 H2	NA	dist_2	M	TRUE	FALSE	FALSE	-0.177778	NA	NA
ENSMUSG00000027522	Stx16	2	174076308	1	2 H4	NA	dist_2	M	TRUE	FALSE	FALSE	-0.0511891	NA	NA
ENSMUSG00000065521	Mir296	2	174267047	-1	2 H4	Gnas	dist_2	P	FALSE	NA	FALSE	NA	NA	NA
ENSMUSG00000065410	Mir298	2	174267504	-1	2 H4	Gnas	dist_2	P	FALSE	NA	FALSE	NA	NA	NA
ENSMUSG00000086537	Nespas	2	174281237	-1	2 H4	Gnas	dist_2	P	TRUE	TRUE	FALSE	-0.166667	NA	NA
ENSMUSG00000027524	Edn3	2	174760619	1	2 H4	Gnas	dist_2	P	FALSE	NA	FALSE	NA	NA	NA
NA	NESP55	2	NA	NA	2 H4	Gnas	dist_2	M	FALSE	NA	FALSE	NA	NA	NA
NA	GNASXL	2	NA	NA	2 H4	Gnas	dist_2	P	FALSE	NA	FALSE	NA	NA	NA
NA	Exon-1A	2	NA	NA	2 H4	Gnas	dist_2	P	FALSE	NA	FALSE	NA	NA	NA
NA	GS-alpha	2	NA	NA	2 H4	Gnas	dist_2	M	FALSE	NA	FALSE	NA	NA	NA
NA	F7	2	NA	NA	2 H4	Gnas	dist_2	M	FALSE	NA	FALSE	NA	NA	NA
ENSMUSG00000001865	Cpa3	3	20215620	-1	NA	NA	misc_3	M	FALSE	NA	FALSE	NA	NA	NA
ENSMUSG00000106223	2400006e01Rik	3	41521247	-1	3 B	NA	cent_3	P	TRUE	TRUE	FALSE	-0.173572	NA	NA
ENSMUSG00000027955	Gask1b	3	79884533	1	3 E3	NA	misc_3	P	TRUE	FALSE	FALSE	-0.134762	NA	NA
ENSMUSG00000097287	D130017N08Rik	5	143758354	1	5 G2	NA	misc_5	P	FALSE	NA	FALSE	NA	NA	NA
ENSMUSG00000023964	Calcr	6	3685680	-1	6 A1	NA	prox_6	M	FALSE	NA	FALSE	NA	NA	NA
ENSMUSG00000029664	Tfpi2	6	3962595	-1	6 A1	NA	prox_6	M	TRUE	FALSE	FALSE	0.364957	NA	NA
ENSMUSG00000065501	Mir335	6	30741299	1	6 A3	NA	prox_6	P	FALSE	NA	FALSE	NA	NA	NA
ENSMUSG00000039032	Tsga13	6	30896981	-1	6 A3.3	NA	prox_6	M	FALSE	NA	FALSE	NA	NA	NA
ENSMUSG00000076490	Trbc1	6	41538218	1	NA	NA	prox_6	M	FALSE	NA	FALSE	NA	NA	NA
ENSMUSG00000055430	Nap1l5	6	58905233	-1	6 C1	NA	prox_6	P	FALSE	NA	FALSE	NA	NA	NA
ENSMUSG00000030114	Klrg1	6	122270596	-1	NA	NA	dist_6	M	FALSE	NA	FALSE	NA	NA	NA
ENSMUSG00000108090	Gm6637	6	122295664	1	NA	NA	dist_6	M	FALSE	NA	FALSE	NA	NA	NA
NA	Copg2os1	6	NA	NA	6 A3	NA	prox_6	P	FALSE	NA	FALSE	NA	NA	NA
ENSMUSG00000108113	Zim2	7	6651748	-1	7 A2-B1	NA	prox_7	M	FALSE	NA	FALSE	NA	NA	NA
ENSMUSG00000108043	Zim3	7	6955685	-1	7 A2-B1	NA	prox_7	M	FALSE	NA	FALSE	NA	NA	NA
ENSMUSG00000109176	Zfp264	7	6977246	1	7 A2-B1	NA	prox_7	P	FALSE	NA	FALSE	NA	NA	NA
ENSMUSG00000077191	Snord64	7	59978808	-1	7C-B5	SNURF-SNRPN	cent_7	P	FALSE	NA	FALSE	NA	NA	NA
ENSMUSG00000089375	Snord107	7	59980876	-1	7C-B5	SNURF-SNRPN	cent_7	P	FALSE	NA	FALSE	NA	NA	NA
ENSMUSG00000102627	Snurf	7	59995449	-1	7 C-B5	SNURF-SNRPN	cent_7	P	FALSE	NA	FALSE	NA	NA	NA
NA	XLOC_075991	7	60641818	-1	7	NA	cent_7	P	FALSE	NA	FALSE	NA	NA	NA
ENSMUSG00000109006	B230209E15Rik	7	61529871	-1	7 C-B5	NA	cent_7	P	FALSE	NA	FALSE	NA	NA	NA
ENSMUSG00000109394	A230057D06Rik	7	61704519	-1	7 C-B5	NA	cent_7	P	FALSE	NA	FALSE	NA	NA	NA
ENSMUSG00000109321	A330076H08Rik	7	61930137	-1	7 C-B5	NA	cent_7	P	FALSE	NA	FALSE	NA	NA	NA
ENSMUSG00000045813	Gm9801	7	62094506	-1	7 C-B5	NA	cent_7	P	FALSE	NA	FALSE	NA	NA	NA
ENSMUSG00000030638	Sh3gl3	7	82173840	1	7 D3	NA	misc_7	P	TRUE	FALSE	FALSE	-0.28141	NA	NA
ENSMUSG00000030724	Cd19	7	126408450	-1	NA	NA	distcent_7	M	FALSE	NA	FALSE	NA	NA	NA
ENSMUSG00000087090	Nctc1	7	142544609	-1	7 F5	NA	dist_7	P	FALSE	NA	FALSE	NA	NA	NA
ENSMUSG00000000215	Ins2	7	142678656	-1	7 F5	NA	dist_7	P	FALSE	NA	FALSE	NA	NA	NA
ENSMUSG00000000214	Th	7	142892752	-1	7 F5	NA	dist_7	M	TRUE	FALSE	FALSE	-0.265022	NA	NA
ENSMUSG00000059277	R74862	7	143021784	-1	7 F5	NA	dist_7	M	FALSE	NA	FALSE	NA	NA	NA
NA	AF313042	7	143462528	NA	7 F5	NA	dist_7	M	FALSE	NA	FALSE	NA	NA	NA
ENSMUSG00000109251	E230032D23Rik	7	143628024	1	7	NA	dist_7	M	FALSE	NA	FALSE	NA	NA	NA
ENSMUSG00000010751	Tnfrsf22	7	143634806	-1	7 F5	NA	dist_7	M	TRUE	TRUE	FALSE	-0.152958	NA	NA
NA	Peg3os	7	NA	NA	7 A1	NA	prox_7	P	FALSE	NA	FALSE	NA	NA	NA
NA	Mkrn3os	7	NA	NA	7C-B5	NA	cent_7	P	FALSE	NA	FALSE	NA	NA	NA
NA	BM117114	7	NA	NA	7C-B5	NA	cent_7	P	FALSE	NA	FALSE	NA	NA	NA
NA	Pec2	7	NA	NA	7C-B5	NA	cent_7	P	FALSE	NA	FALSE	NA	NA	NA
NA	BB077283	7	NA	NA	7C-B5	NA	cent_7	P	FALSE	NA	FALSE	NA	NA	NA
NA	Pec3	7	NA	NA	7C-B5	NA	cent_7	P	FALSE	NA	FALSE	NA	NA	NA
NA	Snord116_cluster	7	NA	NA	7C-B5	pwcr1	cent_7	P	FALSE	NA	FALSE	NA	NA	NA
NA	Snord115_cluster	7	NA	NA	7C-B5	pwcr1	cent_7	P	FALSE	NA	FALSE	NA	NA	NA
NA	U80893	7	NA	NA	7C-B5	NA	cent_7	P	FALSE	NA	FALSE	NA	NA	NA
NA	PIHit	7	NA	NA	7 F5	NA	dist_7	P	FALSE	NA	FALSE	NA	NA	NA
NA	Tsci1	8	80859408	1	8	NA	misc_8	P	FALSE	NA	FALSE	NA	NA	NA
ENSMUSG00000040111	Gramd1b	9	40293233	-1	9 A5.1	NA	misc_9	P	TRUE	FALSE	FALSE	-0.109445	NA	NA
ENSMUSG00000032094	Cd3d	9	44981786	1	NA	NA	misc_9	M	FALSE	NA	FALSE	NA	NA	NA
ENSMUSG00000032299	Commd4	9	57155035	-1	NA	NA	misc_9	P	TRUE	FALSE	FALSE	NA	NA	NA
ENSMUSG00000032280	Tle3	9	61372366	1	9 B	NA	misc_9	P	TRUE	FALSE	FALSE	NA	NA	NA
ENSMUSG00000040204	Pclaf	9	65890237	1	NA	NA	misc_9	P	TRUE	FALSE	FALSE	NA	NA	NA
ENSMUSG00000065596	Mir184	9	89802260	-1	9 E3.1	NA	dist_9	P	FALSE	NA	FALSE	NA	NA	NA
ENSMUSG00000098627	4930524O08Rik	9	89826519	1	9 E3.1	NA	dist_9	P	FALSE	NA	FALSE	NA	NA	NA
ENSMUSG00000032454	Rbp2	9	98486115	1	9 E3.3	NA	dist_9	P	TRUE	TRUE	FALSE	NaN	NA	NA
NA	AS4	9	NA	1	9 E3.1	NA	dist_9	P	FALSE	NA	FALSE	NA	NA	NA
ENSMUSG00000025383	Il23a	10	128296139	-1	NA	NA	dist_10	M	FALSE	NA	FALSE	NA	NA	NA
ENSMUSG00000025348	Itga7	10	128933818	1	NA	NA	dist_10	M	TRUE	FALSE	FALSE	0.0943017	NA	NA
ENSMUSG00000020182	Ddc	11	11814101	-1	11 A1	NA	prox_11	P	TRUE	FALSE	FALSE	0.181241	NA	NA
NA	XLOC_011039	11	12037523	1	11	NA	misc_11	M	FALSE	NA	FALSE	NA	NA	NA
NA	Tsci2	11	12151320	1	11	NA	misc_11	M	FALSE	NA	FALSE	NA	NA	NA
ENSMUSG00000051650	B3gnt2	11	22759738	-1	11 A3.2	NA	prox_11	M	TRUE	FALSE	FALSE	-0.0561418	NA	NA
ENSMUSG00000051355	Commd1	11	22896136	-1	11 A3	NA	prox_11	isoform-specific	TRUE	FALSE	FALSE	0.0910981	NA	NA
ENSMUSG00000020399	Havcr2	11	46454935	1	NA	NA	misc_11	M	FALSE	NA	FALSE	NA	NA	NA
ENSMUSG00000036545	Adamts2	11	50602084	1	11 B1.3	NA	misc_11	P	TRUE	FALSE	FALSE	-0.106744	NA	NA
ENSMUSG00000061469	Gm12569	11	51220473	1	11 B1.3	NA	misc_11	P	TRUE	FALSE	FALSE	0.0653455	NA	NA
ENSMUSG00000035112	Wnk4	11	101260567	1	11 D	NA	misc_11	M	TRUE	FALSE	FALSE	0.0545532	NA	NA
ENSMUSG00000039963	Ccdc40	11	119228572	1	11 E2	NA	misc_11	P	TRUE	TRUE	FALSE	0.0916667	NA	NA
ENSMUSG00000066632	Pgk1-rs7	12	10898986	-1	NA	NA	misc_12	M	FALSE	NA	FALSE	NA	NA	NA
ENSMUSG00000112546	Gm6992	12	31018218	1	NA	NA	misc_12	P	FALSE	NA	FALSE	NA	NA	NA
NA	Tsci4	12	81007809	-1	12	NA	misc_12	P	FALSE	NA	FALSE	NA	NA	NA
ENSMUSG00000047415	Gpr68	12	100876682	-1	12 F1	NA	dist_12	M	FALSE	NA	FALSE	NA	NA	NA
ENSMUSG00000040867	Begain	12	109032187	-1	12 F1	NA	dist_12	P	FALSE	NA	FALSE	NA	NA	NA
ENSMUSG00000112977	Gm34081	12	109493529	-1	12	NA	dist_12	M	FALSE	NA	FALSE	NA	NA	NA
ENSMUSG00000065526	Mir337	12	109585789	1	12 F1	NA	dist_12	M	FALSE	NA	FALSE	NA	NA	NA
ENSMUSG00000070080	Mir431	12	109590447	1	12 F1	anti-Rtl1	dist_12	M	FALSE	NA	FALSE	NA	NA	NA
ENSMUSG00000070072	Mir433	12	109591715	1	12 F1	anti-Rtl1	dist_12	M	FALSE	NA	FALSE	NA	NA	NA
ENSMUSG00000070076	Mir127	12	109592846	1	12 F1	anti-Rtl1	dist_12	M	FALSE	NA	FALSE	NA	NA	NA
ENSMUSG00000070133	Mir434	12	109594506	1	12 F1	anti-Rtl1	dist_12	M	FALSE	NA	FALSE	NA	NA	NA
ENSMUSG00000087855	Mir432	12	109594956	1	12 F1	anti-Rtl1	dist_12	M	FALSE	NA	FALSE	NA	NA	NA
ENSMUSG00000104858	Mir136	12	109595327	1	12 F1	anti-Rtl1	dist_12	M	FALSE	NA	FALSE	NA	NA	NA
ENSMUSG00000065433	Mir370	12	109618258	1	12 F1	Rian	dist_12	M	FALSE	NA	FALSE	NA	NA	NA
ENSMUSG00000088294	AF357425	12	109636012	1	12 F1	Rian	dist_12	M	FALSE	NA	FALSE	NA	NA	NA
NA	AF357426	12	109642838	1	12 F1	Rian	dist_12	M	FALSE	NA	FALSE	NA	NA	NA
NA	AF357359	12	109650709	1	12 F1	Rian	dist_12	M	FALSE	NA	FALSE	NA	NA	NA
ENSMUSG00000064621	Gm26922	12	109654627	1	12 F1	Rian	dist_12	M	FALSE	NA	FALSE	NA	NA	NA
ENSMUSG00000065749	AF357428	12	109679945	1	12 F1	Rian	dist_12	M	FALSE	NA	FALSE	NA	NA	NA
ENSMUSG00000065022	AF357341	12	109681519	1	12 F1	Rian	dist_12	M	FALSE	NA	FALSE	NA	NA	NA
ENSMUSG00000065477	Mir411	12	109710175	1	12 F1	Mirg	dist_12	M	FALSE	NA	FALSE	NA	NA	NA
ENSMUSG00000104582	Mir380	12	109711803	1	12 F1	Mirg	dist_12	M	FALSE	NA	FALSE	NA	NA	NA
ENSMUSG00000105853	Mir376b	12	109723458	1	12 F1	Mirg	dist_12	M	FALSE	NA	FALSE	NA	NA	NA
ENSMUSG00000065426	Mir134	12	109734139	1	12 F1	Mirg	dist_12	M	FALSE	NA	FALSE	NA	NA	NA
ENSMUSG00000065448	Mir154	12	109738433	1	12 F1	Mirg	dist_12	M	FALSE	NA	FALSE	NA	NA	NA
ENSMUSG00000065497	Mir410	12	109743715	1	12 F1	Mirg	dist_12	M	FALSE	NA	FALSE	NA	NA	NA
ENSMUSG00000104213	Ighd	12	113406604	-1	NA	NA	dist_12	M	FALSE	NA	FALSE	NA	NA	NA
NA	DLK1 downstream transcripts	12	NA	NA	12 F1	NA	NA	P	FALSE	NA	FALSE	NA	NA	NA
NA	Mico1	12	NA	NA	12 F1	NA	NA	M	FALSE	NA	FALSE	NA	NA	NA
NA	Mico1os	12	NA	NA	12 F1	NA	NA	M	FALSE	NA	FALSE	NA	NA	NA
NA	anti-Rtl1	12	NA	NA	12 F1	anti-Rtl1	dist_12	M	FALSE	NA	FALSE	NA	NA	NA
ENSMUSG00000053101	Gpr141	13	19749682	-1	NA	NA	misc_13	M	FALSE	NA	FALSE	NA	NA	NA
ENSMUSG00000044231	Nhlrc1	13	47012557	-1	13 A5	NA	cent_13	P	TRUE	TRUE	FALSE	-0.123806	NA	NA
ENSMUSG00000046082	Tmem174	13	98634978	-1	13 D1	NA	dist_13	P	FALSE	NA	FALSE	NA	NA	NA
ENSMUSG00000021699	Pde4d	13	108449948	1	13 D2	NA	dist_13	P	TRUE	FALSE	FALSE	-0.0851422	NA	NA
ENSMUSG00000021848	Otx2	14	48657677	-1	14 C1	NA	prox_14	P	FALSE	NA	FALSE	NA	NA	NA
ENSMUSG00000098682	Otx2os1	14	48668708	1	14 C1	NA	prox_14	P	FALSE	NA	FALSE	NA	NA	NA
ENSMUSG00000040314	Ctsg	14	56099881	-1	NA	NA	prox_14	M	FALSE	NA	FALSE	NA	NA	NA
ENSMUSG00000033470	Cysltr2	14	73025603	-1	NA	NA	cent_14	M	FALSE	NA	FALSE	NA	NA	NA
ENSMUSG00000034997	Htr2a	14	74640840	1	14 D2	NA	cent_14	M	FALSE	NA	FALSE	NA	NA	NA
ENSMUSG00000036760	Kcnk9	15	72501089	-1	15 D3	NA	cent_15	M	FALSE	NA	FALSE	NA	NA	NA
ENSMUSG00000047921	Trappc9	15	72589620	-1	15 D3	NA	cent_15	isoform-specific	TRUE	FALSE	FALSE	0.0917697	NA	NA
ENSMUSG00000000489	Pdgfb	15	79995874	-1	15 E1	NA	cent_15	P	TRUE	FALSE	FALSE	0.0505389	NA	NA
ENSMUSG00000116295	Gm32885	15	97157029	-1	15	NA	misc_15	P	FALSE	NA	FALSE	NA	NA	NA
ENSMUSG00000022657	Cd96	16	46035657	-1	NA	NA	cent_16	M	FALSE	NA	FALSE	NA	NA	NA
ENSMUSG00000022651	Retnlg	16	48872621	1	NA	NA	cent_16	M	FALSE	NA	FALSE	NA	NA	NA
ENSMUSG00000022952	Runx1	16	92601466	-1	16 C4	NA	misc_16	P	TRUE	FALSE	FALSE	0.318555	NA	NA
NA	XLOC_037414	17	4983739	-1	17	NA	prox_17	M	FALSE	NA	FALSE	NA	NA	NA
ENSMUSG00000069729	Arid1b	17	4994332	1	17 A1	NA	prox_17	M	TRUE	TRUE	FALSE	NA	NA	NA
ENSMUSG00000034265	Zdhhc14	17	5492557	1	17A1	NA	prox_17	M	TRUE	TRUE	FALSE	NA	NA	NA
ENSMUSG00000073471	Rsph3a	17	7945614	1	17A1	NA	prox_17	M	TRUE	TRUE	FALSE	NA	NA	NA
ENSMUSG00000023861	Mpc1	17	8282904	1	17A1	NA	prox_17	M	TRUE	TRUE	FALSE	NA	NA	NA
ENSMUSG00000023868	Pde10a	17	8525372	1	17A1	NA	prox_17	M	TRUE	TRUE	FALSE	NA	NA	NA
ENSMUSG00000023873	1700010I14Rik	17	8988333	1	17 A1	NA	prox_17	M	FALSE	NA	FALSE	NA	NA	NA
ENSMUSG00000062078	Qk	17	10202601	-1	17 A1	NA	prox_17	M	TRUE	FALSE	FALSE	NA	NA	NA
ENSMUSG00000037196	Pacrg	17	10403012	-1	17 A1	NA	prox_17	M	FALSE	NA	FALSE	NA	NA	NA
ENSMUSG00000023826	Prkn	17	10840384	1	17 A1	NA	prox_17	M	TRUE	TRUE	FALSE	NA	NA	NA
NA	XLOC_037615	17	12356364	-1	17	NA	prox_17	M	FALSE	NA	FALSE	NA	NA	NA
ENSMUSG00000023828	Slc22a3	17	12418960	-1	17 A1	NA	prox_17	M	TRUE	TRUE	FALSE	NA	NA	NA
ENSMUSG00000040966	Slc22a2	17	12584132	1	17 A1	NA	prox_17	M	FALSE	NA	FALSE	NA	NA	NA
ENSMUSG00000023830	Igf2r	17	12682406	-1	17 A1	NA	prox_17	M	TRUE	TRUE	FALSE	NA	NA	NA
ENSMUSG00000078247	Airn	17	12741311	1	17 A1	NA	prox_17	P	TRUE	TRUE	FALSE	NA	NA	NA
ENSMUSG00000089769	Gm16574	17	12818793	1	NA	NA	prox_17	P	FALSE	NA	FALSE	NA	NA	NA
ENSMUSG00000089817	Gm7162	17	12819819	-1	NA	NA	prox_17	P	TRUE	TRUE	FALSE	NA	NA	NA
ENSMUSG00000073460	Pnldc1	17	12888902	-1	NA	NA	prox_17	M	TRUE	TRUE	FALSE	NA	NA	NA
ENSMUSG00000067049	Unc93a	17	13108617	-1	NA	NA	prox_17	M	FALSE	NA	FALSE	NA	NA	NA
ENSMUSG00000048826	Dact2	17	14195052	-1	17 A2	NA	prox_17	M	TRUE	TRUE	FALSE	NA	NA	NA
ENSMUSG00000023886	Smoc2	17	14279506	1	17 A2	NA	prox_17	M	TRUE	TRUE	FALSE	NA	NA	NA
ENSMUSG00000023885	Thbs2	17	14665500	-1	17 A2	NA	prox_17	M	TRUE	TRUE	FALSE	NA	NA	NA
ENSMUSG00000036594	H2-Aa	17	34282744	-1	NA	NA	misc_17	M	TRUE	TRUE	FALSE	NA	NA	NA
NA	CrossFirre	17	NA	NA	X A5	NA	NA	M	FALSE	NA	FALSE	NA	NA	NA
ENSMUSG00000043458	Pcdhb12	18	37435621	1	18 B3	NA	misc_18	M	FALSE	NA	FALSE	NA	NA	NA
ENSMUSG00000075010	AW112010	19	11047617	-1	NA	NA	misc_19	M	TRUE	TRUE	FALSE	NA	NA	NA
ENSMUSG00000024673	Ms4a1	19	11249675	-1	NA	NA	misc_19	M	FALSE	NA	FALSE	NA	NA	NA
ENSMUSG00000052387	Trpm3	19	22139119	1	NA	NA	misc_19	M	FALSE	NA	FALSE	NA	NA	NA
ENSMUSG00000048720	Tbc1d12	19	38836579	1	19 C3	NA	cent_19	P	TRUE	FALSE	FALSE	NA	NA	NA
ENSMUSG00000089679	Gm16299	19	53819354	-1	19 D2	NA	cent_19	P	FALSE	NA	FALSE	NA	NA	NA
ENSMUSG00000095180	Rhox5	X	37804842	1	X A3.3	NA	cent_X	M	FALSE	NA	FALSE	NA	NA	NA
ENSMUSG00000073125	Xlr3b	X	73192207	1	X A7	NA	dist_X	M	FALSE	NA	FALSE	NA	NA	NA
ENSMUSG00000067768	Xlr4b	X	73214333	1	X A7	NA	dist_X	M	FALSE	NA	FALSE	NA	NA	NA
ENSMUSG00000031362	Xlr4c	X	73233688	-1	X A7	NA	dist_X	M	FALSE	NA	FALSE	NA	NA	NA
ENSMUSG00000085715	Tsix	X	103431517	1	X D	NA	dist_X	P	FALSE	NA	FALSE	NA	NA	NA
ENSMUSG00000086503	Xist	X	103460366	-1	X D	NA	dist_X	P	FALSE	NA	FALSE	NA	NA	NA
ENSMUSG00000097571	Jpx	X	103493556	1	X D	NA	dist_X	P	FALSE	NA	FALSE	NA	NA	NA
ENSMUSG00000086370	Ftx	X	103560907	-1	X D	NA	dist_X	M	FALSE	NA	FALSE	NA	NA	NA
ENSMUSG00000031330	Zcchc13	X	103630586	1	X D	NA	dist_X	M	FALSE	NA	FALSE	NA	NA	NA

## Sheet: E14.5_matzyg_matzygvszyg
Supplementary file 1j. Differential imprinted expression in male E14.5 B6(CastB6) placentae, Smchd1 matzygΔ vs zygΔ. A gene is called differentiallly imprinted if the multiple-testing corrected p-value is below 0.05 and the absolute difference in silent allele proportion greater than 0.05
ensembl_gene_id	gene	chromosome_name	start_position	strand	location	locus	cluster	expressed_allele	expressed	imprinted	sufficient_counts	zygoo_minus_zyg	padj	diff_imprinted
ENSMUSG00000029096	Htra3	5	35652023	-1	5 B3	NA	prox_5	M	TRUE	TRUE	TRUE	-0.16421	0.00553085	TRUE
ENSMUSG00000044068	Zrsr1	11	22972005	1	11 A3	NA	prox_11	P	TRUE	TRUE	TRUE	-0.143164	0.0381321	TRUE
ENSMUSG00000016458	Wt1	2	105126529	1	2 E2-E3	NA	prox_2	M	TRUE	TRUE	TRUE	-0.187471	0.122941	FALSE
ENSMUSG00000021136	Smoc1	12	81026808	1	12 D1	NA	misc_12	P	TRUE	TRUE	TRUE	-0.0973294	0.122941	FALSE
ENSMUSG00000018259	Prl8a2	13	27345673	1	NA	NA	cent_13	M	TRUE	TRUE	TRUE	-0.224439	0.145031	FALSE
ENSMUSG00000082536	Gm13456	2	40555752	1	NA	NA	prox_2	M	TRUE	TRUE	TRUE	0.0275991	0.151009	FALSE
ENSMUSG00000097391	Mirg	12	109729764	1	12 F1	Mirg	dist_12	M	TRUE	TRUE	TRUE	0.0477196	0.208553	FALSE
ENSMUSG00000070526	Peg12	7	62461871	-1	7 C-B5	NA	cent_7	P	TRUE	TRUE	TRUE	-0.160715	0.275283	FALSE
ENSMUSG00000028339	Col15a1	4	47208161	1	NA	NA	misc_4	M	TRUE	TRUE	TRUE	-0.193013	0.297159	FALSE
ENSMUSG00000085860	2410003L11Rik	11	97598511	1	11 D	NA	misc_11	P	TRUE	TRUE	TRUE	0.148838	0.297159	FALSE
ENSMUSG00000029304	Spp1	5	104435118	1	NA	NA	misc_5	M	TRUE	TRUE	TRUE	-0.0338687	0.540315	FALSE
ENSMUSG00000032359	Ctsh	9	90054152	1	9 E3.1	NA	dist_9	P	TRUE	TRUE	TRUE	0.0777789	0.616365	FALSE
ENSMUSG00000086748	Gm13261	2	10339283	-1	NA	NA	prox_2	P	TRUE	TRUE	TRUE	-0.0703309	0.659985	FALSE
ENSMUSG00000086646	Platr20	11	51189833	-1	11 B1.3	NA	misc_11	P	TRUE	TRUE	TRUE	0.112192	0.659985	FALSE
ENSMUSG00000042607	Asb4	6	5383386	1	6 A1	NA	prox_6	M	TRUE	TRUE	TRUE	0.046537	0.801315	FALSE
ENSMUSG00000027520	Zdbf2	1	63273265	1	1 C2	GPR1	cent_1	P	TRUE	TRUE	TRUE	0.0283118	0.814019	FALSE
ENSMUSG00000061186	Sfmbt2	2	10370510	1	2 A1	NA	prox_2	P	TRUE	TRUE	TRUE	-0.0714492	0.814019	FALSE
ENSMUSG00000081833	Gm13669	2	75808358	1	NA	NA	prox_2	M	TRUE	TRUE	TRUE	0.0481338	0.814019	FALSE
ENSMUSG00000042814	Mcts2	2	152687035	1	2 H1	NA	dist_2	P	TRUE	TRUE	TRUE	0.0261858	0.814019	FALSE
ENSMUSG00000008999	Bmp7	2	172868012	-1	2 H3	NA	dist_2	P	TRUE	TRUE	TRUE	0.216877	0.814019	FALSE
ENSMUSG00000083219	Gm11410	4	80003989	1	NA	NA	misc_4	M	TRUE	TRUE	TRUE	0.017652	0.814019	FALSE
ENSMUSG00000028859	Csf3r	4	126024550	1	NA	NA	misc_4	M	TRUE	TRUE	TRUE	-0.114693	0.814019	FALSE
ENSMUSG00000040013	Fkbp6	5	135291704	-1	5 G2	NA	misc_5	P	TRUE	TRUE	TRUE	0.0177558	0.814019	FALSE
ENSMUSG00000002265	Peg3	7	6703892	-1	7 A2-B1	NA	prox_7	P	TRUE	TRUE	TRUE	-0.00504028	0.814019	FALSE
ENSMUSG00000000948	Gm38393	7	59974149	-1	7 C-B5	NA	cent_7	P	TRUE	TRUE	TRUE	0.0333333	0.814019	FALSE
ENSMUSG00000033585	Ndn	7	62346569	1	7 C-B5	NA	cent_7	P	TRUE	TRUE	TRUE	-0.0948601	0.814019	FALSE
ENSMUSG00000031714	Gab1	8	80764438	-1	8 C2	NA	misc_8	P	TRUE	TRUE	TRUE	-0.0511267	0.814019	FALSE
ENSMUSG00000019814	Ltv1	10	13178140	-1	NA	NA	cent_10	M	TRUE	TRUE	TRUE	-0.0409601	0.814019	FALSE
ENSMUSG00000043439	Epop	11	97627389	-1	NA	NA	misc_11	P	TRUE	TRUE	TRUE	0.0337857	0.814019	FALSE
ENSMUSG00000039963	Ccdc40	11	119228572	1	11 E2	NA	misc_11	P	TRUE	TRUE	TRUE	0.0921965	0.814019	FALSE
ENSMUSG00000021268	Meg3	12	109541001	1	12 F1	NA	dist_12	M	TRUE	TRUE	TRUE	0.0094677	0.814019	FALSE
ENSMUSG00000085925	Rtl1	12	109589193	-1	12 F1	NA	dist_12	P	TRUE	TRUE	TRUE	0.0119446	0.814019	FALSE
ENSMUSG00000044231	Nhlrc1	13	47012557	-1	13 A5	NA	cent_13	P	TRUE	TRUE	TRUE	-0.176175	0.814019	FALSE
ENSMUSG00000059256	Gzmd	14	56129556	-1	NA	NA	prox_14	M	TRUE	TRUE	TRUE	-0.0167433	0.814019	FALSE
ENSMUSG00000106847	Peg13	15	72805600	-1	15 D3	NA	cent_15	P	TRUE	TRUE	TRUE	-0.0139469	0.814019	FALSE
ENSMUSG00000024423	Impact	18	12955852	1	18 A2-B2	NA	cent_18	P	TRUE	TRUE	TRUE	-0.0356965	0.814019	FALSE
ENSMUSG00000024610	Cd74	18	60803848	1	NA	NA	misc_18	M	TRUE	TRUE	TRUE	-0.0371606	0.814019	FALSE
ENSMUSG00000025764	Jade1	3	41555731	1	3 B	NA	cent_3	P	TRUE	TRUE	TRUE	0.0292398	0.826949	FALSE
ENSMUSG00000027551	Zfp64	2	168893331	-1	2 H3	NA	dist_2	P	TRUE	TRUE	TRUE	-0.0353452	0.853124	FALSE
ENSMUSG00000027523	Gnas	2	174284320	1	2 H4	Gnas	dist_2	M	TRUE	TRUE	TRUE	0.0355757	0.853124	FALSE
ENSMUSG00000097639	Platr4	3	41484024	-1	3 B	NA	cent_3	P	TRUE	TRUE	TRUE	-0.0353611	0.853124	FALSE
ENSMUSG00000028581	Laptm5	4	130913125	1	NA	NA	misc_4	M	TRUE	TRUE	TRUE	-0.0341526	0.853124	FALSE
ENSMUSG00000092035	Peg10	6	4747306	1	6 A1	NA	prox_6	P	TRUE	TRUE	TRUE	0.00297465	0.853124	FALSE
ENSMUSG00000032827	Ppp1r9a	6	4902917	1	6 A1	NA	prox_6	M	TRUE	TRUE	TRUE	-0.012877	0.853124	FALSE
ENSMUSG00000029775	Klhdc10	6	30401868	1	6 A3	NA	prox_6	M	TRUE	TRUE	TRUE	0.0195735	0.853124	FALSE
ENSMUSG00000073209	Klf14	6	30956023	-1	6 A3	NA	prox_6	M	TRUE	TRUE	TRUE	-0.00279058	0.853124	FALSE
ENSMUSG00000002266	Zim1	7	6671269	-1	7 A2-B1	NA	prox_7	M	TRUE	TRUE	TRUE	-0.00539044	0.853124	FALSE
ENSMUSG00000100826	Snhg14	7	59307924	-1	7 C-B5	NA	cent_7	P	TRUE	TRUE	TRUE	0.00386937	0.853124	FALSE
ENSMUSG00000019817	Plagl1	10	13060504	1	10 A2	NA	cent_10	P	TRUE	TRUE	TRUE	0.00864579	0.853124	FALSE
ENSMUSG00000020176	Grb10	11	11930508	-1	11 A1	NA	prox_11	isoform-specific	TRUE	TRUE	TRUE	-0.0249103	0.853124	FALSE
ENSMUSG00000040856	Dlk1	12	109452823	1	12 F1	NA	dist_12	P	TRUE	TRUE	TRUE	0.00722665	0.853124	FALSE
ENSMUSG00000097451	Rian	12	109603940	1	12 F1	NA	dist_12	M	TRUE	TRUE	TRUE	0.00632291	0.853124	FALSE
ENSMUSG00000040284	Gzmg	14	56156582	-1	NA	NA	prox_14	M	TRUE	TRUE	TRUE	0.0040404	0.853124	FALSE
ENSMUSG00000079186	Gzmc	14	56231441	-1	NA	NA	prox_14	M	TRUE	TRUE	TRUE	-0.00397351	0.853124	FALSE
ENSMUSG00000075707	Dio3	12	110279068	1	12 F1	NA	dist_12	P	TRUE	TRUE	TRUE	0.00977862	0.876982	FALSE
ENSMUSG00000106223	2400006e01Rik	3	41521247	-1	3 B	NA	cent_3	P	TRUE	TRUE	TRUE	-0.0601538	0.91592	FALSE
ENSMUSG00000056071	S100a9	3	90692632	-1	NA	NA	misc_3	M	TRUE	TRUE	TRUE	0.0580783	0.91592	FALSE
ENSMUSG00000102252	Snrpn	7	59982495	-1	7 C-B5	SNURF-SNRPN	cent_7	P	TRUE	TRUE	TRUE	-0.0052456	0.91592	FALSE
ENSMUSG00000022156	Gzme	14	56117626	-1	NA	NA	prox_14	M	TRUE	TRUE	TRUE	0.00781449	0.91592	FALSE
ENSMUSG00000036698	Ago2	15	73095844	-1	15 D3	NA	cent_15	M	TRUE	TRUE	TRUE	0.0208132	0.91592	FALSE
ENSMUSG00000025607	Copg2	6	30747554	-1	6 A3	NA	prox_6	M	TRUE	TRUE	TRUE	0.00970958	0.942164	FALSE
ENSMUSG00000051527	Usp29	7	6730578	1	7 A2-B1	NA	prox_7	P	TRUE	TRUE	TRUE	-0.00585975	0.942164	FALSE
ENSMUSG00000056972	Magel2	7	62377010	1	7 C-B5	NA	cent_7	P	TRUE	TRUE	TRUE	-0.0117018	0.967323	FALSE
ENSMUSG00000026395	Ptprc	1	138062861	-1	NA	NA	misc_1	M	TRUE	TRUE	TRUE	-0.0118579	0.984328	FALSE
ENSMUSG00000019188	H13	2	152669461	1	2 H1	NA	dist_2	isoform-specific	TRUE	TRUE	TRUE	-0.00378241	0.984328	FALSE
ENSMUSG00000004631	Sgce	6	4674350	-1	6 A1	NA	prox_6	P	TRUE	TRUE	TRUE	-0.00361357	0.984328	FALSE
ENSMUSG00000070527	Mkrn3	7	62417593	-1	7 C-B5	NA	cent_7	P	TRUE	TRUE	TRUE	0.00601334	0.984328	FALSE
ENSMUSG00000062866	Phactr2	10	13207717	-1	10 A1	NA	cent_10	M	TRUE	TRUE	TRUE	0.00456718	0.984328	FALSE
ENSMUSG00000037202	Prf1	10	61297833	1	NA	NA	mid_10	M	TRUE	TRUE	TRUE	0	0.984328	FALSE
ENSMUSG00000045942	BC049762	11	51253651	-1	11 B1.3	NA	misc_11	P	TRUE	TRUE	TRUE	-0.00262346	0.984328	FALSE
ENSMUSG00000022464	Slc38a4	15	96994820	-1	15 F1	NA	misc_15	P	TRUE	TRUE	TRUE	-0.0301485	0.984328	FALSE
ENSMUSG00000087119	Atg4a-ps	3	103643954	-1	NA	NA	misc_3	M	TRUE	TRUE	TRUE	0	0.987379	FALSE
ENSMUSG00000097694	G730013B05Rik	16	50526245	1	16 B5	NA	cent_16	P	TRUE	TRUE	TRUE	-0.00442266	0.988809	FALSE
ENSMUSG00000051855	Mest	6	30723547	1	6 A3	NA	prox_6	isoform-specific	TRUE	TRUE	TRUE	-0.00125694	0.991139	FALSE
ENSMUSG00000031962	Cdh15	8	122847966	1	8 E1	NA	misc_8	isoform-specific	TRUE	TRUE	TRUE	0	0.991272	FALSE
ENSMUSG00000000290	Itgb2	10	77530252	1	NA	NA	mid_10	M	TRUE	TRUE	TRUE	0.00394389	0.991272	FALSE
ENSMUSG00000025967	Eef1b2	1	63176825	1	1 C2	GPR1	cent_1	P	TRUE	FALSE	FALSE	-0.00460541	NA	FALSE
ENSMUSG00000046856	Gpr1	1	63182691	-1	1 C2	GPR1	cent_1	P	TRUE	FALSE	FALSE	0.0238821	NA	FALSE
ENSMUSG00000025964	Adam23	1	63445891	1	1 C2	GPR1	cent_1	P	TRUE	FALSE	FALSE	0.0442922	NA	FALSE
ENSMUSG00000026471	Mr1	1	155127277	-1	1 G3	NA	misc_1	M	TRUE	FALSE	FALSE	-0.0163765	NA	FALSE
ENSMUSG00000026470	Stx6	1	155158715	1	1 G3	NA	misc_1	M	TRUE	FALSE	FALSE	0.0149788	NA	FALSE
ENSMUSG00000033722	BC034090	1	155212471	-1	1 G3	NA	misc_1	M	TRUE	FALSE	FALSE	-0.00957605	NA	FALSE
ENSMUSG00000026970	Rbms1	2	60750193	-1	2 C1.2	NA	prox_2	P	TRUE	FALSE	FALSE	-0.00971988	NA	FALSE
ENSMUSG00000009876	Cox4i2	2	152754173	1	2 H1	NA	dist_2	P	TRUE	FALSE	FALSE	0.00703591	NA	FALSE
ENSMUSG00000007659	Bcl2l1	2	152780668	-1	2 H1	NA	dist_2	P	TRUE	FALSE	FALSE	0.0381869	NA	FALSE
ENSMUSG00000067787	Blcap	2	157556362	-1	2 H1	NA	dist_2	isoform-specific	TRUE	FALSE	FALSE	-0.00250973	NA	FALSE
ENSMUSG00000067786	Nnat	2	157560078	1	2 H1	NA	dist_2	P	TRUE	TRUE	FALSE	0	NA	FALSE
ENSMUSG00000027522	Stx16	2	174076308	1	2 H4	NA	dist_2	M	TRUE	FALSE	FALSE	-0.0405739	NA	FALSE
ENSMUSG00000039263	Npepl1	2	174110349	1	2 H4	NA	dist_2	M	TRUE	FALSE	FALSE	0.00462971	NA	FALSE
ENSMUSG00000105260	Gm40040	3	41477577	-1	NA	NA	cent_3	P	TRUE	FALSE	FALSE	-0.0283451	NA	FALSE
ENSMUSG00000028078	Dclk2	3	86786151	-1	NA	NA	misc_3	M	TRUE	FALSE	FALSE	-0.0133901	NA	FALSE
ENSMUSG00000015189	Casd1	6	4600839	1	6 A1	NA	prox_6	M	TRUE	FALSE	FALSE	0.0128889	NA	FALSE
ENSMUSG00000029804	Herc3	6	58831465	1	6 B3	NA	prox_6	isoform-specific	TRUE	FALSE	FALSE	0.00505099	NA	FALSE
ENSMUSG00000025889	Snca	6	60731575	-1	NA	NA	prox_6	M	TRUE	FALSE	FALSE	0.0404779	NA	FALSE
ENSMUSG00000030199	Etv6	6	134035700	1	6 G1	NA	dist_6	P	TRUE	FALSE	FALSE	0.0266619	NA	FALSE
ENSMUSG00000002602	Axl	7	25757273	-1	7 A3-B1	NA	misc_7	M	TRUE	FALSE	FALSE	0.00846825	NA	FALSE
ENSMUSG00000030579	Tyrobp	7	30413760	1	NA	NA	misc_7	M	TRUE	FALSE	FALSE	-0.0358745	NA	FALSE
ENSMUSG00000025326	Ube3a	7	59228750	1	7 C-B5	NA	cent_7	M	TRUE	FALSE	FALSE	-0.030317	NA	FALSE
ENSMUSG00000030638	Sh3gl3	7	82173840	1	7 D3	NA	misc_7	P	TRUE	FALSE	FALSE	-0.0416667	NA	FALSE
ENSMUSG00000031665	Sall1	8	89027235	-1	NA	NA	misc_8	P	TRUE	FALSE	FALSE	-0.00879719	NA	FALSE
ENSMUSG00000032422	Snx14	9	88376750	-1	9 E3.1	NA	dist_9	P	TRUE	FALSE	FALSE	-4.63215e-06	NA	FALSE
ENSMUSG00000019795	Pcmt1	10	7629373	-1	10 A1	NA	misc_10	P	TRUE	FALSE	FALSE	0.0225738	NA	FALSE
ENSMUSG00000025348	Itga7	10	128933818	1	NA	NA	dist_10	M	TRUE	FALSE	FALSE	-0.0324252	NA	FALSE
ENSMUSG00000051355	Commd1	11	22896136	-1	11 A3	NA	prox_11	isoform-specific	TRUE	FALSE	FALSE	-0.0376617	NA	FALSE
ENSMUSG00000035112	Wnk4	11	101260567	1	11 D	NA	misc_11	M	TRUE	FALSE	FALSE	-0.0194204	NA	FALSE
ENSMUSG00000020634	Ubxn2a	12	4879032	-1	NA	NA	prox_12	P	TRUE	FALSE	FALSE	0.0203404	NA	FALSE
ENSMUSG00000015143	Actn1	12	80167547	-1	12 C3	NA	misc_12	P	TRUE	FALSE	FALSE	-0.00644149	NA	FALSE
ENSMUSG00000021266	Wars	12	108860030	-1	12 F1	NA	dist_12	P	TRUE	FALSE	FALSE	0.0162564	NA	FALSE
ENSMUSG00000017843	Ppp2r5c	12	110447120	1	12 F1	NA	dist_12	P	TRUE	FALSE	FALSE	0.00819132	NA	FALSE
ENSMUSG00000018707	Dync1h1	12	110601452	1	12 F1	NA	dist_12	P	TRUE	FALSE	FALSE	0.000220092	NA	FALSE
ENSMUSG00000016477	E2f3	13	29906575	-1	13 A3.2	NA	cent_13	P	TRUE	FALSE	FALSE	-2.06973e-05	NA	FALSE
ENSMUSG00000041773	Enc1	13	97241105	1	13 D1	NA	dist_13	P	TRUE	FALSE	FALSE	-0.0178485	NA	FALSE
ENSMUSG00000021699	Pde4d	13	108449948	1	13 D2	NA	dist_13	P	TRUE	FALSE	FALSE	-0.0145009	NA	FALSE
ENSMUSG00000015441	Gzmf	14	56205263	-1	NA	NA	prox_14	M	TRUE	TRUE	FALSE	0	NA	FALSE
ENSMUSG00000022139	Mbnl2	14	120275669	1	14 E4	NA	misc_14	P	TRUE	FALSE	FALSE	0.00443837	NA	FALSE
ENSMUSG00000000489	Pdgfb	15	79995874	-1	15 E1	NA	cent_15	P	TRUE	FALSE	FALSE	0.0455265	NA	FALSE
ENSMUSG00000023169	Slc38a1	15	96571418	-1	15 F1	NA	misc_15	P	TRUE	FALSE	FALSE	0.0082323	NA	FALSE
ENSMUSG00000022462	Slc38a2	15	96687392	-1	15 F1	NA	misc_15	P	TRUE	FALSE	FALSE	0.0213635	NA	FALSE
ENSMUSG00000022641	Bbx	16	50191844	-1	16 B5	NA	cent_16	P	TRUE	FALSE	FALSE	-0.00789938	NA	FALSE
ENSMUSG00000022639	Dubr	16	50719294	-1	NA	NA	cent_16	P	TRUE	FALSE	FALSE	-0.01348	NA	FALSE
ENSMUSG00000044906	4930503L19Rik	18	70452212	-1	NA	NA	misc_18	P	TRUE	FALSE	FALSE	-0.0196619	NA	FALSE
ENSMUSG00000026358	Rgs1	1	144242296	-1	NA	NA	misc_1	M	FALSE	NA	FALSE	NA	NA	NA
ENSMUSG00000026581	Sell	1	164061982	1	NA	NA	misc_1	M	FALSE	NA	FALSE	NA	NA	NA
ENSMUSG00000073494	Sh2d1b2	1	170232749	1	NA	NA	misc_1	M	FALSE	NA	FALSE	NA	NA	NA
ENSMUSG00000038421	Fcrla	1	170917576	-1	NA	NA	misc_1	M	FALSE	NA	FALSE	NA	NA	NA
NA	Zdbf2linc	1	NA	NA	1 C2	GPR1	cent_1	P	FALSE	NA	FALSE	NA	NA	NA
NA	XLOC_047844	2	10308628	-1	2	NA	prox_2	P	FALSE	NA	FALSE	NA	NA	NA
ENSMUSG00000026770	Il2ra	2	11642807	1	NA	NA	prox_2	M	FALSE	NA	FALSE	NA	NA	NA
ENSMUSG00000087701	Gm13493	2	51871126	-1	NA	NA	prox_2	M	TRUE	TRUE	FALSE	NaN	NA	NA
ENSMUSG00000040093	Bmf	2	118528757	-1	NA	NA	prox_2	M	TRUE	FALSE	FALSE	-0.102385	NA	NA
ENSMUSG00000068129	Cst7	2	150570415	1	NA	NA	dist_2	M	FALSE	NA	FALSE	NA	NA	NA
ENSMUSG00000042745	Id1	2	152736251	1	2 H1	NA	dist_2	P	TRUE	FALSE	FALSE	-0.0542072	NA	NA
ENSMUSG00000027469	Tpx2	2	152847964	1	2 H1	NA	dist_2	P	TRUE	FALSE	FALSE	-0.071344	NA	NA
ENSMUSG00000074622	Mafb	2	160363703	-1	2 H2	NA	dist_2	M	TRUE	FALSE	FALSE	-0.279178	NA	NA
ENSMUSG00000065521	Mir296	2	174267047	-1	2 H4	Gnas	dist_2	P	FALSE	NA	FALSE	NA	NA	NA
ENSMUSG00000065410	Mir298	2	174267504	-1	2 H4	Gnas	dist_2	P	FALSE	NA	FALSE	NA	NA	NA
ENSMUSG00000086537	Nespas	2	174281237	-1	2 H4	Gnas	dist_2	P	TRUE	TRUE	FALSE	-0.375	NA	NA
ENSMUSG00000027524	Edn3	2	174760619	1	2 H4	Gnas	dist_2	P	FALSE	NA	FALSE	NA	NA	NA
NA	NESP55	2	NA	NA	2 H4	Gnas	dist_2	M	FALSE	NA	FALSE	NA	NA	NA
NA	GNASXL	2	NA	NA	2 H4	Gnas	dist_2	P	FALSE	NA	FALSE	NA	NA	NA
NA	Exon-1A	2	NA	NA	2 H4	Gnas	dist_2	P	FALSE	NA	FALSE	NA	NA	NA
NA	GS-alpha	2	NA	NA	2 H4	Gnas	dist_2	M	FALSE	NA	FALSE	NA	NA	NA
NA	F7	2	NA	NA	2 H4	Gnas	dist_2	M	FALSE	NA	FALSE	NA	NA	NA
ENSMUSG00000001865	Cpa3	3	20215620	-1	NA	NA	misc_3	M	FALSE	NA	FALSE	NA	NA	NA
ENSMUSG00000027955	Gask1b	3	79884533	1	3 E3	NA	misc_3	P	TRUE	FALSE	FALSE	-0.0620192	NA	NA
ENSMUSG00000037221	Mospd3	5	137596645	-1	5 G2	NA	misc_5	P	TRUE	FALSE	FALSE	0.0861079	NA	NA
ENSMUSG00000097287	D130017N08Rik	5	143758354	1	5 G2	NA	misc_5	P	FALSE	NA	FALSE	NA	NA	NA
ENSMUSG00000042817	Flt3	5	147330741	-1	NA	NA	misc_5	P	TRUE	FALSE	FALSE	NA	NA	NA
ENSMUSG00000023964	Calcr	6	3685680	-1	6 A1	NA	prox_6	M	FALSE	NA	FALSE	NA	NA	NA
ENSMUSG00000029664	Tfpi2	6	3962595	-1	6 A1	NA	prox_6	M	TRUE	FALSE	FALSE	-0.120441	NA	NA
ENSMUSG00000065501	Mir335	6	30741299	1	6 A3	NA	prox_6	P	FALSE	NA	FALSE	NA	NA	NA
ENSMUSG00000039032	Tsga13	6	30896981	-1	6 A3.3	NA	prox_6	M	FALSE	NA	FALSE	NA	NA	NA
ENSMUSG00000076490	Trbc1	6	41538218	1	NA	NA	prox_6	M	FALSE	NA	FALSE	NA	NA	NA
ENSMUSG00000055430	Nap1l5	6	58905233	-1	6 C1	NA	prox_6	P	FALSE	NA	FALSE	NA	NA	NA
ENSMUSG00000030114	Klrg1	6	122270596	-1	NA	NA	dist_6	M	FALSE	NA	FALSE	NA	NA	NA
ENSMUSG00000108090	Gm6637	6	122295664	1	NA	NA	dist_6	M	FALSE	NA	FALSE	NA	NA	NA
NA	Copg2os1	6	NA	NA	6 A3	NA	prox_6	P	FALSE	NA	FALSE	NA	NA	NA
ENSMUSG00000108113	Zim2	7	6651748	-1	7 A2-B1	NA	prox_7	M	FALSE	NA	FALSE	NA	NA	NA
ENSMUSG00000108043	Zim3	7	6955685	-1	7 A2-B1	NA	prox_7	M	FALSE	NA	FALSE	NA	NA	NA
ENSMUSG00000109176	Zfp264	7	6977246	1	7 A2-B1	NA	prox_7	P	FALSE	NA	FALSE	NA	NA	NA
ENSMUSG00000077191	Snord64	7	59978808	-1	7C-B5	SNURF-SNRPN	cent_7	P	FALSE	NA	FALSE	NA	NA	NA
ENSMUSG00000089375	Snord107	7	59980876	-1	7C-B5	SNURF-SNRPN	cent_7	P	FALSE	NA	FALSE	NA	NA	NA
ENSMUSG00000102627	Snurf	7	59995449	-1	7 C-B5	SNURF-SNRPN	cent_7	P	FALSE	NA	FALSE	NA	NA	NA
NA	XLOC_075991	7	60641818	-1	7	NA	cent_7	P	FALSE	NA	FALSE	NA	NA	NA
ENSMUSG00000109006	B230209E15Rik	7	61529871	-1	7 C-B5	NA	cent_7	P	FALSE	NA	FALSE	NA	NA	NA
ENSMUSG00000109394	A230057D06Rik	7	61704519	-1	7 C-B5	NA	cent_7	P	FALSE	NA	FALSE	NA	NA	NA
ENSMUSG00000109321	A330076H08Rik	7	61930137	-1	7 C-B5	NA	cent_7	P	FALSE	NA	FALSE	NA	NA	NA
ENSMUSG00000045813	Gm9801	7	62094506	-1	7 C-B5	NA	cent_7	P	FALSE	NA	FALSE	NA	NA	NA
ENSMUSG00000030724	Cd19	7	126408450	-1	NA	NA	distcent_7	M	FALSE	NA	FALSE	NA	NA	NA
ENSMUSG00000030782	Tgfb1i1	7	128246812	1	7 F3	NA	distcent_7	M	TRUE	FALSE	FALSE	NA	NA	NA
ENSMUSG00000030847	Bag3	7	128523616	1	7 F3	NA	distcent_7	M	TRUE	FALSE	FALSE	NA	NA	NA
ENSMUSG00000042105	Inpp5f	7	128611328	1	7 F3	NA	distcent_7	P	TRUE	FALSE	FALSE	NA	NA	NA
ENSMUSG00000045777	Ifitm10	7	142325837	-1	7 F5	NA	dist_7	M	TRUE	FALSE	FALSE	NA	NA	NA
ENSMUSG00000018819	Lsp1	7	142460809	1	7 F5	NA	dist_7	M	TRUE	FALSE	FALSE	NA	NA	NA
ENSMUSG00000087090	Nctc1	7	142544609	-1	7 F5	NA	dist_7	P	FALSE	NA	FALSE	NA	NA	NA
ENSMUSG00000000031	H19	7	142575529	-1	7 F5	NA	dist_7	M	TRUE	TRUE	FALSE	NA	NA	NA
ENSMUSG00000048583	Igf2	7	142650766	-1	7 F5	NA	dist_7	P	TRUE	TRUE	FALSE	NA	NA	NA
ENSMUSG00000086266	Igf2os	7	142659693	1	7 F5	NA	dist_7	P	TRUE	TRUE	FALSE	NA	NA	NA
ENSMUSG00000000215	Ins2	7	142678656	-1	7 F5	NA	dist_7	P	FALSE	NA	FALSE	NA	NA	NA
ENSMUSG00000000214	Th	7	142892752	-1	7 F5	NA	dist_7	M	TRUE	FALSE	FALSE	NA	NA	NA
ENSMUSG00000009248	Ascl2	7	142966829	-1	7 F5	NA	dist_7	M	TRUE	TRUE	FALSE	NA	NA	NA
ENSMUSG00000059277	R74862	7	143021784	-1	7 F5	NA	dist_7	M	FALSE	NA	FALSE	NA	NA	NA
ENSMUSG00000037706	Cd81	7	143052739	1	7 F5	NA	dist_7	M	TRUE	FALSE	FALSE	NA	NA	NA
ENSMUSG00000045752	Tssc4	7	143069249	1	7 F5	NA	dist_7	M	TRUE	TRUE	FALSE	NA	NA	NA
ENSMUSG00000009545	Kcnq1	7	143106362	1	7 F5	NA	dist_7	M	TRUE	TRUE	FALSE	NA	NA	NA
ENSMUSG00000101609	Kcnq1ot1	7	143203458	-1	7 F5	NA	dist_7	P	TRUE	TRUE	FALSE	NA	NA	NA
ENSMUSG00000037664	Cdkn1c	7	143458339	-1	7 F5	NA	dist_7	M	TRUE	TRUE	FALSE	NA	NA	NA
NA	AF313042	7	143462528	NA	7 F5	NA	dist_7	M	FALSE	NA	FALSE	NA	NA	NA
ENSMUSG00000000154	Slc22a18	7	143473736	1	7 F5	NA	dist_7	M	TRUE	TRUE	FALSE	NA	NA	NA
ENSMUSG00000010760	Phlda2	7	143501545	-1	7 F5	NA	dist_7	M	TRUE	TRUE	FALSE	NA	NA	NA
ENSMUSG00000059119	Nap1l4	7	143513579	-1	7 F5	NA	dist_7	M	TRUE	FALSE	FALSE	NA	NA	NA
ENSMUSG00000045362	Tnfrsf26	7	143607659	-1	7 F5	NA	dist_7	M	TRUE	TRUE	FALSE	NA	NA	NA
ENSMUSG00000109251	E230032D23Rik	7	143628024	1	7	NA	dist_7	M	FALSE	NA	FALSE	NA	NA	NA
ENSMUSG00000010751	Tnfrsf22	7	143634806	-1	7 F5	NA	dist_7	M	TRUE	TRUE	FALSE	NA	NA	NA
ENSMUSG00000037613	Tnfrsf23	7	143665809	-1	7 F5	NA	dist_7	M	TRUE	TRUE	FALSE	NA	NA	NA
ENSMUSG00000037606	Osbpl5	7	143688762	-1	7 F5	NA	dist_7	M	TRUE	TRUE	FALSE	NA	NA	NA
ENSMUSG00000031075	Ano1	7	144588549	-1	7 F5	NA	dist_7	M	TRUE	TRUE	FALSE	NA	NA	NA
NA	Peg3os	7	NA	NA	7 A1	NA	prox_7	P	FALSE	NA	FALSE	NA	NA	NA
NA	Mkrn3os	7	NA	NA	7C-B5	NA	cent_7	P	FALSE	NA	FALSE	NA	NA	NA
NA	BM117114	7	NA	NA	7C-B5	NA	cent_7	P	FALSE	NA	FALSE	NA	NA	NA
NA	Pec2	7	NA	NA	7C-B5	NA	cent_7	P	FALSE	NA	FALSE	NA	NA	NA
NA	BB077283	7	NA	NA	7C-B5	NA	cent_7	P	FALSE	NA	FALSE	NA	NA	NA
NA	Pec3	7	NA	NA	7C-B5	NA	cent_7	P	FALSE	NA	FALSE	NA	NA	NA
NA	Snord116_cluster	7	NA	NA	7C-B5	pwcr1	cent_7	P	FALSE	NA	FALSE	NA	NA	NA
NA	Snord115_cluster	7	NA	NA	7C-B5	pwcr1	cent_7	P	FALSE	NA	FALSE	NA	NA	NA
NA	U80893	7	NA	NA	7C-B5	NA	cent_7	P	FALSE	NA	FALSE	NA	NA	NA
NA	PIHit	7	NA	NA	7 F5	NA	dist_7	P	FALSE	NA	FALSE	NA	NA	NA
NA	Tsci1	8	80859408	1	8	NA	misc_8	P	FALSE	NA	FALSE	NA	NA	NA
ENSMUSG00000040111	Gramd1b	9	40293233	-1	9 A5.1	NA	misc_9	P	TRUE	FALSE	FALSE	-0.134483	NA	NA
ENSMUSG00000032094	Cd3d	9	44981786	1	NA	NA	misc_9	M	FALSE	NA	FALSE	NA	NA	NA
ENSMUSG00000032299	Commd4	9	57155035	-1	NA	NA	misc_9	P	TRUE	FALSE	FALSE	NA	NA	NA
ENSMUSG00000032280	Tle3	9	61372366	1	9 B	NA	misc_9	P	TRUE	FALSE	FALSE	NA	NA	NA
ENSMUSG00000040204	Pclaf	9	65890237	1	NA	NA	misc_9	P	TRUE	FALSE	FALSE	NA	NA	NA
ENSMUSG00000065596	Mir184	9	89802260	-1	9 E3.1	NA	dist_9	P	FALSE	NA	FALSE	NA	NA	NA
ENSMUSG00000098627	4930524O08Rik	9	89826519	1	9 E3.1	NA	dist_9	P	FALSE	NA	FALSE	NA	NA	NA
ENSMUSG00000032356	Rasgrf1	9	89909908	1	9 E3.1	NA	dist_9	P	TRUE	TRUE	FALSE	0.119451	NA	NA
ENSMUSG00000032454	Rbp2	9	98486115	1	9 E3.3	NA	dist_9	P	TRUE	TRUE	FALSE	NaN	NA	NA
NA	AS4	9	NA	1	9 E3.1	NA	dist_9	P	FALSE	NA	FALSE	NA	NA	NA
ENSMUSG00000025383	Il23a	10	128296139	-1	NA	NA	dist_10	M	FALSE	NA	FALSE	NA	NA	NA
ENSMUSG00000020182	Ddc	11	11814101	-1	11 A1	NA	prox_11	P	TRUE	FALSE	FALSE	0.181241	NA	NA
NA	XLOC_011039	11	12037523	1	11	NA	misc_11	M	FALSE	NA	FALSE	NA	NA	NA
NA	Tsci2	11	12151320	1	11	NA	misc_11	M	FALSE	NA	FALSE	NA	NA	NA
ENSMUSG00000020173	Cobl	11	12236608	-1	11 A1	NA	prox_11	M	TRUE	FALSE	FALSE	0.144714	NA	NA
ENSMUSG00000051650	B3gnt2	11	22759738	-1	11 A3.2	NA	prox_11	M	TRUE	FALSE	FALSE	-0.0908624	NA	NA
ENSMUSG00000020399	Havcr2	11	46454935	1	NA	NA	misc_11	M	FALSE	NA	FALSE	NA	NA	NA
ENSMUSG00000036545	Adamts2	11	50602084	1	11 B1.3	NA	misc_11	P	TRUE	FALSE	FALSE	-0.123829	NA	NA
ENSMUSG00000061469	Gm12569	11	51220473	1	11 B1.3	NA	misc_11	P	TRUE	FALSE	FALSE	0.172018	NA	NA
ENSMUSG00000066632	Pgk1-rs7	12	10898986	-1	NA	NA	misc_12	M	FALSE	NA	FALSE	NA	NA	NA
ENSMUSG00000112546	Gm6992	12	31018218	1	NA	NA	misc_12	P	FALSE	NA	FALSE	NA	NA	NA
NA	Tsci4	12	81007809	-1	12	NA	misc_12	P	FALSE	NA	FALSE	NA	NA	NA
ENSMUSG00000047415	Gpr68	12	100876682	-1	12 F1	NA	dist_12	M	FALSE	NA	FALSE	NA	NA	NA
ENSMUSG00000040867	Begain	12	109032187	-1	12 F1	NA	dist_12	P	FALSE	NA	FALSE	NA	NA	NA
ENSMUSG00000112977	Gm34081	12	109493529	-1	12	NA	dist_12	M	FALSE	NA	FALSE	NA	NA	NA
ENSMUSG00000065526	Mir337	12	109585789	1	12 F1	NA	dist_12	M	FALSE	NA	FALSE	NA	NA	NA
ENSMUSG00000070080	Mir431	12	109590447	1	12 F1	anti-Rtl1	dist_12	M	FALSE	NA	FALSE	NA	NA	NA
ENSMUSG00000070072	Mir433	12	109591715	1	12 F1	anti-Rtl1	dist_12	M	FALSE	NA	FALSE	NA	NA	NA
ENSMUSG00000070076	Mir127	12	109592846	1	12 F1	anti-Rtl1	dist_12	M	FALSE	NA	FALSE	NA	NA	NA
ENSMUSG00000070133	Mir434	12	109594506	1	12 F1	anti-Rtl1	dist_12	M	FALSE	NA	FALSE	NA	NA	NA
ENSMUSG00000087855	Mir432	12	109594956	1	12 F1	anti-Rtl1	dist_12	M	FALSE	NA	FALSE	NA	NA	NA
ENSMUSG00000104858	Mir136	12	109595327	1	12 F1	anti-Rtl1	dist_12	M	FALSE	NA	FALSE	NA	NA	NA
ENSMUSG00000065433	Mir370	12	109618258	1	12 F1	Rian	dist_12	M	FALSE	NA	FALSE	NA	NA	NA
ENSMUSG00000088294	AF357425	12	109636012	1	12 F1	Rian	dist_12	M	FALSE	NA	FALSE	NA	NA	NA
NA	AF357426	12	109642838	1	12 F1	Rian	dist_12	M	FALSE	NA	FALSE	NA	NA	NA
NA	AF357359	12	109650709	1	12 F1	Rian	dist_12	M	FALSE	NA	FALSE	NA	NA	NA
ENSMUSG00000064621	Gm26922	12	109654627	1	12 F1	Rian	dist_12	M	FALSE	NA	FALSE	NA	NA	NA
ENSMUSG00000065749	AF357428	12	109679945	1	12 F1	Rian	dist_12	M	FALSE	NA	FALSE	NA	NA	NA
ENSMUSG00000065022	AF357341	12	109681519	1	12 F1	Rian	dist_12	M	FALSE	NA	FALSE	NA	NA	NA
ENSMUSG00000065477	Mir411	12	109710175	1	12 F1	Mirg	dist_12	M	FALSE	NA	FALSE	NA	NA	NA
ENSMUSG00000104582	Mir380	12	109711803	1	12 F1	Mirg	dist_12	M	FALSE	NA	FALSE	NA	NA	NA
ENSMUSG00000105853	Mir376b	12	109723458	1	12 F1	Mirg	dist_12	M	FALSE	NA	FALSE	NA	NA	NA
ENSMUSG00000065426	Mir134	12	109734139	1	12 F1	Mirg	dist_12	M	FALSE	NA	FALSE	NA	NA	NA
ENSMUSG00000065448	Mir154	12	109738433	1	12 F1	Mirg	dist_12	M	FALSE	NA	FALSE	NA	NA	NA
ENSMUSG00000065497	Mir410	12	109743715	1	12 F1	Mirg	dist_12	M	FALSE	NA	FALSE	NA	NA	NA
ENSMUSG00000104213	Ighd	12	113406604	-1	NA	NA	dist_12	M	FALSE	NA	FALSE	NA	NA	NA
NA	DLK1 downstream transcripts	12	NA	NA	12 F1	NA	NA	P	FALSE	NA	FALSE	NA	NA	NA
NA	Mico1	12	NA	NA	12 F1	NA	NA	M	FALSE	NA	FALSE	NA	NA	NA
NA	Mico1os	12	NA	NA	12 F1	NA	NA	M	FALSE	NA	FALSE	NA	NA	NA
NA	anti-Rtl1	12	NA	NA	12 F1	anti-Rtl1	dist_12	M	FALSE	NA	FALSE	NA	NA	NA
ENSMUSG00000053101	Gpr141	13	19749682	-1	NA	NA	misc_13	M	FALSE	NA	FALSE	NA	NA	NA
ENSMUSG00000047842	Diras2	13	52504380	-1	NA	NA	cent_13	M	TRUE	FALSE	FALSE	-0.134554	NA	NA
ENSMUSG00000046082	Tmem174	13	98634978	-1	13 D1	NA	dist_13	P	FALSE	NA	FALSE	NA	NA	NA
ENSMUSG00000021848	Otx2	14	48657677	-1	14 C1	NA	prox_14	P	FALSE	NA	FALSE	NA	NA	NA
ENSMUSG00000098682	Otx2os1	14	48668708	1	14 C1	NA	prox_14	P	FALSE	NA	FALSE	NA	NA	NA
ENSMUSG00000040314	Ctsg	14	56099881	-1	NA	NA	prox_14	M	FALSE	NA	FALSE	NA	NA	NA
ENSMUSG00000033470	Cysltr2	14	73025603	-1	NA	NA	cent_14	M	FALSE	NA	FALSE	NA	NA	NA
ENSMUSG00000034997	Htr2a	14	74640840	1	14 D2	NA	cent_14	M	FALSE	NA	FALSE	NA	NA	NA
ENSMUSG00000061517	Sox21	14	118233232	-1	14 E4	NA	misc_14	P	TRUE	FALSE	FALSE	-0.0767729	NA	NA
ENSMUSG00000036760	Kcnk9	15	72501089	-1	15 D3	NA	cent_15	M	FALSE	NA	FALSE	NA	NA	NA
ENSMUSG00000047921	Trappc9	15	72589620	-1	15 D3	NA	cent_15	isoform-specific	TRUE	FALSE	FALSE	0.0909704	NA	NA
ENSMUSG00000068391	Chrac1	15	73090392	1	15 D3	NA	cent_15	M	TRUE	FALSE	FALSE	0.141751	NA	NA
ENSMUSG00000116295	Gm32885	15	97157029	-1	15	NA	misc_15	P	FALSE	NA	FALSE	NA	NA	NA
ENSMUSG00000037280	Galnt6	15	100691813	-1	15 F1	NA	misc_15	P	TRUE	FALSE	FALSE	0.162849	NA	NA
ENSMUSG00000022657	Cd96	16	46035657	-1	NA	NA	cent_16	M	FALSE	NA	FALSE	NA	NA	NA
ENSMUSG00000022651	Retnlg	16	48872621	1	NA	NA	cent_16	M	FALSE	NA	FALSE	NA	NA	NA
ENSMUSG00000022952	Runx1	16	92601466	-1	16 C4	NA	misc_16	P	TRUE	FALSE	FALSE	0.0789081	NA	NA
NA	XLOC_037414	17	4983739	-1	17	NA	prox_17	M	FALSE	NA	FALSE	NA	NA	NA
ENSMUSG00000069729	Arid1b	17	4994332	1	17 A1	NA	prox_17	M	TRUE	TRUE	FALSE	NA	NA	NA
ENSMUSG00000034265	Zdhhc14	17	5492557	1	17A1	NA	prox_17	M	TRUE	TRUE	FALSE	NA	NA	NA
ENSMUSG00000073471	Rsph3a	17	7945614	1	17A1	NA	prox_17	M	TRUE	TRUE	FALSE	NA	NA	NA
ENSMUSG00000023861	Mpc1	17	8282904	1	17A1	NA	prox_17	M	TRUE	TRUE	FALSE	NA	NA	NA
ENSMUSG00000023868	Pde10a	17	8525372	1	17A1	NA	prox_17	M	TRUE	TRUE	FALSE	NA	NA	NA
ENSMUSG00000023873	1700010I14Rik	17	8988333	1	17 A1	NA	prox_17	M	FALSE	NA	FALSE	NA	NA	NA
ENSMUSG00000062078	Qk	17	10202601	-1	17 A1	NA	prox_17	M	TRUE	FALSE	FALSE	NA	NA	NA
ENSMUSG00000037196	Pacrg	17	10403012	-1	17 A1	NA	prox_17	M	FALSE	NA	FALSE	NA	NA	NA
ENSMUSG00000023826	Prkn	17	10840384	1	17 A1	NA	prox_17	M	TRUE	TRUE	FALSE	NA	NA	NA
NA	XLOC_037615	17	12356364	-1	17	NA	prox_17	M	FALSE	NA	FALSE	NA	NA	NA
ENSMUSG00000023828	Slc22a3	17	12418960	-1	17 A1	NA	prox_17	M	TRUE	TRUE	FALSE	NA	NA	NA
ENSMUSG00000040966	Slc22a2	17	12584132	1	17 A1	NA	prox_17	M	FALSE	NA	FALSE	NA	NA	NA
ENSMUSG00000023830	Igf2r	17	12682406	-1	17 A1	NA	prox_17	M	TRUE	TRUE	FALSE	NA	NA	NA
ENSMUSG00000078247	Airn	17	12741311	1	17 A1	NA	prox_17	P	TRUE	TRUE	FALSE	NA	NA	NA
ENSMUSG00000089769	Gm16574	17	12818793	1	NA	NA	prox_17	P	FALSE	NA	FALSE	NA	NA	NA
ENSMUSG00000089817	Gm7162	17	12819819	-1	NA	NA	prox_17	P	TRUE	TRUE	FALSE	NA	NA	NA
ENSMUSG00000073460	Pnldc1	17	12888902	-1	NA	NA	prox_17	M	TRUE	TRUE	FALSE	NA	NA	NA
ENSMUSG00000067049	Unc93a	17	13108617	-1	NA	NA	prox_17	M	FALSE	NA	FALSE	NA	NA	NA
ENSMUSG00000048826	Dact2	17	14195052	-1	17 A2	NA	prox_17	M	TRUE	TRUE	FALSE	NA	NA	NA
ENSMUSG00000023886	Smoc2	17	14279506	1	17 A2	NA	prox_17	M	TRUE	TRUE	FALSE	NA	NA	NA
ENSMUSG00000023885	Thbs2	17	14665500	-1	17 A2	NA	prox_17	M	TRUE	TRUE	FALSE	NA	NA	NA
ENSMUSG00000036594	H2-Aa	17	34282744	-1	NA	NA	misc_17	M	TRUE	TRUE	FALSE	NA	NA	NA
ENSMUSG00000024140	Epas1	17	86753700	1	17 E4	NA	cent_17	P	TRUE	FALSE	FALSE	0.0524496	NA	NA
NA	CrossFirre	17	NA	NA	X A5	NA	NA	M	FALSE	NA	FALSE	NA	NA	NA
ENSMUSG00000043458	Pcdhb12	18	37435621	1	18 B3	NA	misc_18	M	FALSE	NA	FALSE	NA	NA	NA
ENSMUSG00000075010	AW112010	19	11047617	-1	NA	NA	misc_19	M	TRUE	TRUE	FALSE	NA	NA	NA
ENSMUSG00000024673	Ms4a1	19	11249675	-1	NA	NA	misc_19	M	FALSE	NA	FALSE	NA	NA	NA
ENSMUSG00000052387	Trpm3	19	22139119	1	NA	NA	misc_19	M	FALSE	NA	FALSE	NA	NA	NA
ENSMUSG00000048720	Tbc1d12	19	38836579	1	19 C3	NA	cent_19	P	TRUE	FALSE	FALSE	NA	NA	NA
ENSMUSG00000089679	Gm16299	19	53819354	-1	19 D2	NA	cent_19	P	FALSE	NA	FALSE	NA	NA	NA
ENSMUSG00000095180	Rhox5	X	37804842	1	X A3.3	NA	cent_X	M	FALSE	NA	FALSE	NA	NA	NA
ENSMUSG00000073125	Xlr3b	X	73192207	1	X A7	NA	dist_X	M	FALSE	NA	FALSE	NA	NA	NA
ENSMUSG00000067768	Xlr4b	X	73214333	1	X A7	NA	dist_X	M	FALSE	NA	FALSE	NA	NA	NA
ENSMUSG00000031362	Xlr4c	X	73233688	-1	X A7	NA	dist_X	M	FALSE	NA	FALSE	NA	NA	NA
ENSMUSG00000085715	Tsix	X	103431517	1	X D	NA	dist_X	P	FALSE	NA	FALSE	NA	NA	NA
ENSMUSG00000086503	Xist	X	103460366	-1	X D	NA	dist_X	P	FALSE	NA	FALSE	NA	NA	NA
ENSMUSG00000097571	Jpx	X	103493556	1	X D	NA	dist_X	P	FALSE	NA	FALSE	NA	NA	NA
ENSMUSG00000086370	Ftx	X	103560907	-1	X D	NA	dist_X	M	FALSE	NA	FALSE	NA	NA	NA
ENSMUSG00000031330	Zcchc13	X	103630586	1	X D	NA	dist_X	M	FALSE	NA	FALSE	NA	NA	NA

[truncated: 6 more sheets: E9.5_matzyg_matvswt, E9.5_matzyg_zygvswt, E9.5_matzyg_matzygvswt, E9.5_matzyg_zygvsmat, E9.5_matzyg_matzygvsmat, E9.5_matzyg_matzygvszyg]
