# Supplementary material for: Smchd1 is a maternal effect gene required for genomic imprinting
Source: eLife. 2020 Nov 13;9:e55529. doi: 10.7554/eLife.55529 (PMC7665889; doi:10.7554/eLife.55529)
Supplement: Supplementary file 2. — (a) Differential expression (non-split counts) in male E9.5 B6Cast embryos, Smchd1 matΔ versus wt. A gene is called differentially expressed if the q-value is below 0.05 and the fold change is greater than 2. (b) Differential expression (non-split counts) in male E14.5 B6Cast embryonic placentae, Smchd1 matΔ versus wt (MMTV-Cre). A gene is called differentially expressed if the q-value is below 0.05 and the fold change is greater than 2. (c) Differential expression (non-split counts) in male E14.5 B6Cast embryonic placentae, Smchd1 matΔ versus wt (Zp3-Cre). A gene is called differentially expressed if the q-value is below 0.05 and the fold change is greater than 2. (d) Differential expression (non-split counts) in male E14.5 CastB6 embryonic placentae, Smchd1 het versus wt. A gene is called differentially expressed if the q-value is below 0.05 and the fold change is greater than 2. (e) Differential expression (non-split counts) in male E2.75 B6Cast embryos, Smchd1 matΔ versus wt. A gene is called differentially expressed if the q-value is below 0.05 and the fold change is greater than 2. [file elife-55529-supp2.xlsx]

## Sheet: matdel_E9.5e_totDE_results
Supplementary file 2a. Differential expression (non-split counts) in male E9.5 B6Cast embryos, Smchd1 matΔ vs wt. A gene is called differentially expressed if the q-value is below 0.05 and the fold change is greater than 2.
ensembl_gene_id	logFC	logCPM	LR	PValue	FDR	mgi_symbol	chromosome_name	strand	start_position	end_position	status
ENSMUSG00000073489	6.4719	0.746947	16.6869	4.4084e-05	0.000609424	Ifi204	1	-1	173747293	173766943	DE
ENSMUSG00000021441	3.93755	4.06367	7.82756	0.00514556	0.0204497	Cts6	13	-1	61195132	61203410	DE
ENSMUSG00000021439	3.60485	5.49492	7.335	0.00676248	0.0253098	Ctsq	13	-1	61035024	61040631	DE
ENSMUSG00000055298	3.41566	5.42091	6.47073	0.0109665	0.0365153	Ctsj	13	-1	61000179	61005959	DE
ENSMUSG00000053228	3.36785	2.96865	6.91097	0.00856687	0.0302335	Ceacam3	7	1	17150282	17164253	DE
ENSMUSG00000057195	3.32658	2.74898	6.22901	0.0125674	0.0404161	Ceacam13	7	1	18009889	18019221	DE
ENSMUSG00000030366	3.29977	2.91375	6.40615	0.0113725	0.0375829	Ceacam12	7	1	18065929	18077986	DE
ENSMUSG00000074870	3.24838	4.15263	6.18069	0.0129152	0.0412332	Cts3	13	-1	61564630	61570127	DE
ENSMUSG00000021348	3.22984	3.43678	6.08384	0.0136424	0.0430589	Prl7d1	13	-1	27706337	27716736	DE
ENSMUSG00000004540	3.19937	2.58188	5.82417	0.0158074	0.0481558	Psg17	7	-1	18813937	18821607	DE
ENSMUSG00000006490	3.19921	5.43208	6.17913	0.0129266	0.0412521	Prl8a9	13	-1	27557995	27564606	DE
ENSMUSG00000021346	3.17197	3.96546	5.9433	0.0147734	0.0457223	Prl8a8	13	-1	27506968	27513217	DE
ENSMUSG00000046899	3.15314	5.22217	5.8676	0.0154221	0.0473064	Prl7a2	13	-1	27658584	27668036	DE
ENSMUSG00000062705	3.07813	5.01786	5.83072	0.0157487	0.0480358	Tpbpb	13	-1	60901188	60904880	DE
ENSMUSG00000068048	3.06589	2.47903	5.864	0.0154536	0.0473285	Rhox9	X	-1	37899097	37901770	DE
ENSMUSG00000047661	2.98777	4.17113	5.75987	0.0163963	0.0495665	1600012P17Rik	1	-1	158967701	158980463	DE
ENSMUSG00000039153	2.92192	0.0306458	31.92	1.60654e-08	2.07333e-06	Runx2	17	-1	44495987	44814797	DE
ENSMUSG00000073530	2.64667	3.97869	7.37875	0.0065999	0.0248693	Pappa2	1	-1	158711727	158980490	DE
ENSMUSG00000044022	2.54136	0.182922	36.1838	1.79553e-09	4.64997e-07	Pcdhb21	18	1	37513621	37518325	DE
ENSMUSG00000073012	2.29889	1.93197	6.5097	0.0107287	0.0359877	Fnd3c2	X	-1	106235246	106255376	DE
ENSMUSG00000043313	2.23512	1.26168	30.6107	3.15354e-08	3.27771e-06	Pcdhb19	18	1	37496991	37504128	DE
ENSMUSG00000057722	2.21414	3.69725	6.15437	0.0131088	0.0417547	Lepr	4	1	101717404	101815352	DE
ENSMUSG00000048347	2.17296	0.426965	36.5533	1.48552e-09	4.44675e-07	Pcdhb18	18	1	37489465	37494505	DE
ENSMUSG00000046191	2.05449	0.400442	15.8791	6.7522e-05	0.00082633	Pcdhb20	18	1	37504264	37507822	DE
ENSMUSG00000024621	2.01026	3.01888	7.40979	0.00648699	0.0245635	Csf1r	18	1	61105572	61132149	DE
ENSMUSG00000046387	1.97662	1.02762	27.9491	1.2455e-07	9.27431e-06	Pcdhb17	18	1	37484795	37489454	DE
ENSMUSG00000031133	1.97015	3.02124	6.19337	0.0128229	0.041	Arhgef6	X	-1	57231485	57338729	DE
ENSMUSG00000048251	1.90346	2.8387	11.2703	0.000787566	0.00492171	Bcl11b	12	-1	107910403	108003602	DE
ENSMUSG00000027947	1.8507	0.77946	7.10489	0.0076874	0.0278501	Il6ra	3	-1	89864059	89913196	DE
ENSMUSG00000097023	1.83177	1.76204	14.4889	0.000140985	0.00139558	Mir9-3hg	7	1	79500026	79534403	DE
ENSMUSG00000073591	1.83144	1.91733	40.4027	2.06654e-10	1.18961e-07	Pcdhb22	18	1	37517871	37524479	DE
ENSMUSG00000048865	1.80337	0.470655	14.4431	0.000144462	0.00141781	Arhgap30	1	1	171388954	171410298	DE
ENSMUSG00000033377	1.79522	0.983836	20.9173	4.79548e-06	0.000127034	Palmd	3	-1	116918258	116968987	DE
ENSMUSG00000027596	1.73967	1.51288	12.7551	0.000355049	0.00271817	a	2	1	154791402	155051012	DE
ENSMUSG00000032128	1.73572	1.54962	6.79896	0.00912108	0.0316961	Robo3	9	-1	37415669	37433246	DE
ENSMUSG00000045518	1.71696	1.3258	13.7021	0.000214214	0.00188063	Onecut3	10	1	80494835	80517276	DE
ENSMUSG00000047810	1.70279	0.333631	12.4929	0.000408492	0.00301731	Ccdc88b	19	-1	6844623	6858211	DE
ENSMUSG00000008658	1.69649	1.3776	16.1681	5.79633e-05	0.000742754	Rbfox1	16	1	5885355	7411526	DE
ENSMUSG00000050334	1.67833	3.8469	9.87251	0.00167766	0.00871558	C130071C03Rik	13	1	83721381	83884194	DE
ENSMUSG00000020374	1.6654	0.249687	14.1391	0.000169778	0.00160421	Rasgef1c	11	1	49901835	49980994	DE
ENSMUSG00000030302	1.65657	0.433083	10.2885	0.0013386	0.00739856	Atp2b2	6	-1	113743831	114042613	DE
ENSMUSG00000000263	1.65461	0.650488	22.3388	2.28543e-06	7.58162e-05	Glra1	11	-1	55514238	55608198	DE
ENSMUSG00000036915	1.64423	1.22916	15.7989	7.04443e-05	0.000844824	Kirrel2	7	-1	30447534	30457690	DE
ENSMUSG00000022766	1.63822	0.226844	11.7601	0.000605146	0.00403492	Serpind1	16	1	17331371	17343575	DE
ENSMUSG00000030500	1.63658	1.23748	10.1513	0.00144197	0.00783278	Slc17a6	7	1	51622006	51671119	DE
ENSMUSG00000053693	1.62759	0.543065	12.5127	0.000404192	0.00299038	Mast1	8	-1	84911903	84937359	DE
ENSMUSG00000059481	1.62305	0.123394	9.41687	0.00214998	0.010509	Plg	17	1	12378608	12419385	DE
ENSMUSG00000060807	1.62194	1.46371	10.0228	0.00154615	0.00824412	Serpina6	12	-1	103646630	103657212	DE
ENSMUSG00000051506	1.61617	0.318313	12.4829	0.000410704	0.00302212	Wdfy4	14	-1	32959547	33185508	DE
ENSMUSG00000113600	1.61096	0.965173	8.78963	0.00302948	0.0137027	Gm7868	12	1	69123101	69123780	DE
ENSMUSG00000008496	1.60606	2.49898	10.4176	0.00124819	0.00700476	Pou2f2	7	-1	25087344	25179726	DE
ENSMUSG00000047793	1.58262	1.68461	11.7239	0.000617018	0.0040953	Sned1	1	1	93235841	93301065	DE
ENSMUSG00000000861	1.57184	3.68319	12.8043	0.000345823	0.00266638	Bcl11a	11	1	24078056	24174123	DE
ENSMUSG00000079065	1.56075	3.44627	12.6713	0.000371319	0.00280967	BC005561	5	1	104508352	104522611	DE
ENSMUSG00000111594	1.5518	0.431819	21.1961	4.14605e-06	0.000114915	Gm3365	8	-1	69554802	69585162	DE
ENSMUSG00000026712	1.5428	1.51753	8.72791	0.00313375	0.0140827	Mrc1	2	1	14229392	14332057	DE
ENSMUSG00000031285	1.53126	5.6797	15.3681	8.84704e-05	0.000989136	Dcx	X	-1	143855842	143933311	DE
ENSMUSG00000036913	1.529	0.626128	6.25061	0.012415	0.0400811	Trim67	8	1	124793092	124834713	DE
ENSMUSG00000113411	1.52014	0.507681	7.34694	0.0067177	0.0252152	Gm48643	12	-1	19865126	19865495	DE
ENSMUSG00000057716	1.52008	1.68167	15.1319	0.000100254	0.00108835	Tmem178b	6	1	39873271	40255150	DE
ENSMUSG00000048385	1.51795	2.35786	10.5378	0.0011696	0.0066535	Scrt1	15	-1	76516203	76522499	DE
ENSMUSG00000085224	1.51435	0.445081	15.7367	7.27997e-05	0.000864756	Gm13425	2	-1	31633453	31640589	DE
ENSMUSG00000040840	1.49568	0.584248	11.3028	0.000773911	0.00485666	4930579G18Rik	14	1	54650511	54654607	DE
ENSMUSG00000085069	1.48555	0.83916	11.7839	0.000597456	0.00400321	Gm13111	4	1	154637576	154644724	DE
ENSMUSG00000060534	1.48298	2.72266	12.8254	0.000341937	0.00264621	Dcc	18	-1	71258738	72351069	DE
ENSMUSG00000021700	1.48149	1.80029	10.1453	0.00144667	0.00784506	Rab3c	13	-1	110054187	110280996	DE
ENSMUSG00000020159	1.47132	1.32876	5.98381	0.0144378	0.0450268	Gabrp	11	-1	33550781	33578959	DE
ENSMUSG00000036905	1.46699	0.952255	5.80647	0.0159673	0.048564	C1qb	4	-1	136880129	136886187	DE
ENSMUSG00000025083	1.46482	2.5187	7.70225	0.00551521	0.0216033	Afap1l2	19	-1	56912361	57008228	DE
ENSMUSG00000053024	1.46303	4.96067	23.2336	1.43469e-06	5.45682e-05	Cntn2	1	-1	132509427	132543256	DE
ENSMUSG00000024897	1.4497	1.01299	8.41111	0.00372936	0.0160027	Apba1	19	1	23758876	23949597	DE
ENSMUSG00000002341	1.4336	2.88872	10.933	0.000944646	0.00563207	Ncan	8	-1	70093085	70120873	DE
ENSMUSG00000026395	1.42973	0.40786	7.85325	0.00507295	0.0202472	Ptprc	1	-1	138062861	138175708	DE
ENSMUSG00000018698	1.4235	2.44444	13.5502	0.000232273	0.00200255	Lhx1	11	-1	84518284	84525535	DE
ENSMUSG00000009739	1.42234	2.21313	10.2885	0.00133861	0.00739856	Pou6f1	15	-1	100575318	100599984	DE
ENSMUSG00000035459	1.41726	0.458194	8.90292	0.00284715	0.0130276	Stab2	10	-1	86841198	87008025	DE
ENSMUSG00000041596	1.3986	0.733908	8.36601	0.00382304	0.0162787	Nlrp5-ps	7	-1	14530652	14622479	DE
ENSMUSG00000053835	1.39533	0.559638	20.497	5.97238e-06	0.00014923	H2-T24	17	-1	36005695	36020560	DE
ENSMUSG00000079157	1.38725	0.434647	14.931	0.000111515	0.0011854	Fam155a	8	-1	9205902	9771161	DE
ENSMUSG00000028001	1.38132	0.290481	8.71241	0.00316051	0.0141515	Fga	3	1	83026076	83033627	DE
ENSMUSG00000021685	1.37671	1.23737	6.5491	0.0104937	0.0353674	Otp	13	1	94875602	94885130	DE
ENSMUSG00000060257	1.36355	2.97232	18.9711	1.32714e-05	0.000253359	Scrt2	2	1	152081529	152095802	DE
ENSMUSG00000015950	1.36208	0.772215	13.6716	0.000217718	0.0019056	Ncf1	5	-1	134220053	134229625	DE
ENSMUSG00000053129	1.35927	0.761386	15.02	0.000106376	0.00114377	Gsx1	5	1	147188696	147190947	DE
ENSMUSG00000027977	1.35633	1.1818	13.6254	0.000223151	0.00193937	Ndst3	3	-1	123526166	123690853	DE
ENSMUSG00000049100	1.35347	2.96136	24.6842	6.75365e-07	3.08449e-05	Pcdh10	3	1	45378398	45435623	DE
ENSMUSG00000049281	1.34654	1.1167	12.1262	0.000497189	0.00346257	Scn3b	9	1	40269217	40291618	DE
ENSMUSG00000070942	1.34055	0.452117	16.5664	4.69756e-05	0.00063398	Il1rl2	1	1	40324610	40367562	DE
ENSMUSG00000016346	1.34021	2.01714	12.517	0.000403267	0.00299011	Kcnq2	2	-1	181075579	181135300	DE
ENSMUSG00000021301	1.33438	1.23903	9.51014	0.0020434	0.0101136	Hecw1	13	-1	14226438	14523228	DE
ENSMUSG00000046805	1.32959	0.935022	6.37342	0.0115842	0.0381477	Mpeg1	19	1	12460779	12465284	DE
ENSMUSG00000034116	1.32876	0.32443	13.7019	0.000214236	0.00188063	Vav1	17	1	57279100	57328031	DE
ENSMUSG00000030077	1.3257	1.80255	22.3088	2.32145e-06	7.65312e-05	Chl1	6	1	103510586	103750211	DE
ENSMUSG00000039116	1.32168	2.90667	14.0747	0.000175689	0.00164224	Adgrg6	10	-1	14402583	14545659	DE
ENSMUSG00000008575	1.31679	3.43003	13.6234	0.000223389	0.00193937	Nfib	4	-1	82290173	82705750	DE
ENSMUSG00000026247	1.30259	1.36828	8.73541	0.00312089	0.0140355	Ecel1	1	-1	87147655	87156521	DE
ENSMUSG00000033597	1.30091	2.72887	7.17881	0.00737695	0.0270217	Caskin1	17	1	24488601	24508671	DE
ENSMUSG00000094410	1.28695	2.44207	23.7214	1.1134e-06	4.61614e-05	Gm38394	1	-1	133619940	133661318	DE
ENSMUSG00000046182	1.27835	1.29646	14.2974	0.000156077	0.00150904	Gsg1l	7	-1	125878420	126082411	DE
ENSMUSG00000033705	1.27802	2.5219	9.49333	0.0020622	0.0101932	Stard9	2	1	120629121	120731895	DE
ENSMUSG00000072294	1.27449	2.38619	8.91404	0.00282987	0.0129723	Klf12	14	-1	99870632	100284679	DE
ENSMUSG00000028565	1.25169	1.75309	10.1566	0.00143788	0.00782289	Nfia	4	1	97772734	98118874	DE
ENSMUSG00000052336	1.24485	1.41779	6.37535	0.0115716	0.0381145	Cx3cr1	9	-1	119901616	120069879	DE
ENSMUSG00000091562	1.24372	2.45234	14.1442	0.000169317	0.00160188	NA	NA	NA	NA	NA	DE
ENSMUSG00000042564	1.23835	0.813094	10.4518	0.00122532	0.00691271	Fam227a	15	-1	79609576	79658956	DE
ENSMUSG00000021198	1.23619	0.700604	9.04906	0.0026283	0.0122167	Unc79	12	1	102948859	103184065	DE
ENSMUSG00000103585	1.23556	2.06492	28.5664	9.05393e-08	7.61293e-06	Pcdhgb4	18	1	37720369	37841870	DE
ENSMUSG00000055805	1.2351	0.498728	10.9722	0.000924909	0.00554834	Fmnl1	11	1	103171107	103198901	DE
ENSMUSG00000032452	1.23439	2.24351	17.3908	3.04288e-05	0.000466316	Clstn2	9	-1	97444395	98033181	DE
ENSMUSG00000003410	1.22864	4.74188	21.0607	4.4497e-06	0.00012065	Elavl3	9	-1	22015005	22052023	DE
ENSMUSG00000028116	1.22395	-0.0425932	10.0868	0.00149336	0.00802555	Myoz2	3	-1	123006206	123035015	DE
ENSMUSG00000024900	1.22282	2.71348	6.72293	0.00951809	0.0328242	Cpt1a	19	1	3323301	3385732	DE
ENSMUSG00000031189	1.22074	3.34709	25.7794	3.8276e-07	2.05332e-05	Aff2	X	1	69360294	69868037	DE
ENSMUSG00000020061	1.21089	1.88673	12.3909	0.000431439	0.0031309	Mybpc1	10	-1	88518279	88605152	DE
ENSMUSG00000034098	1.20937	0.660104	8.79048	0.00302807	0.0137027	Fstl5	3	1	76074270	76710019	DE
ENSMUSG00000057182	1.20248	2.02654	9.74986	0.00179336	0.00917024	Scn3a	2	-1	65457118	65567627	DE
ENSMUSG00000023473	1.20214	3.03449	9.61175	0.00193336	0.00971352	Celsr3	9	1	108826320	108852969	DE
ENSMUSG00000022708	1.1984	2.27739	7.5833	0.00589116	0.0227779	Zbtb20	16	1	42875881	43642602	DE
ENSMUSG00000040035	1.19324	1.15263	12.1328	0.000495436	0.00345536	Disp2	2	1	118779719	118811293	DE
ENSMUSG00000042425	1.19321	0.890555	8.36785	0.00381918	0.0162742	Frmpd3	X	1	140342263	140435467	DE
ENSMUSG00000034413	1.19265	0.439984	13.662	0.000218841	0.00190985	Neurl1b	17	1	26414829	26446349	DE
ENSMUSG00000020908	1.18972	3.96243	19.6708	9.19984e-06	0.000200208	Myh3	11	1	67078300	67102291	DE
ENSMUSG00000097743	1.17834	2.03974	11.1131	0.000857191	0.0052386	Gm16973	14	-1	56696280	56701268	DE
ENSMUSG00000061436	1.17733	5.9909	19.73	8.91898e-06	0.000195688	Hipk2	6	-1	38694390	38876165	DE
ENSMUSG00000053199	1.17707	2.10231	16.7993	4.15492e-05	0.000581184	Arhgap20	9	1	51765337	51853856	DE
ENSMUSG00000027939	1.17693	-0.0222312	7.75284	0.00536281	0.021128	Nup210l	3	1	90104132	90212048	DE
ENSMUSG00000055761	1.17613	0.735512	13.4501	0.000244998	0.00207991	Nkain3	4	-1	20118874	20778866	DE
ENSMUSG00000046709	1.16925	2.16482	7.53257	0.00605936	0.0232958	Mapk10	5	-1	102907948	103211334	DE
ENSMUSG00000078190	1.16751	1.94468	6.65473	0.0098893	0.0337698	Dnm3os	1	1	162217623	162225550	DE
ENSMUSG00000005580	1.16685	0.78354	14.8581	0.000115908	0.00121569	Adcy9	16	-1	4287529	4420498	DE
ENSMUSG00000042581	1.16571	2.01886	18.3488	1.83932e-05	0.000325403	Thsd7b	1	1	129273302	130219278	DE
ENSMUSG00000051243	1.16249	3.38008	12.321	0.000447899	0.00321212	Islr2	9	-1	58196297	58204319	DE
ENSMUSG00000027833	1.16155	3.93241	17.2604	3.25915e-05	0.000489265	Shox2	3	-1	66971727	66981771	DE
ENSMUSG00000027273	1.15809	2.2123	12.4923	0.000408639	0.00301731	Snap25	2	1	136713453	136782428	DE
ENSMUSG00000030854	1.15217	1.69243	18.0238	2.18162e-05	0.000364423	Ptpn5	7	-1	47077795	47133684	DE
ENSMUSG00000018411	1.15201	3.0578	14.8018	0.000119422	0.00124211	Mapt	11	1	104231390	104332090	DE
ENSMUSG00000030592	1.15031	1.69483	15.7826	7.10534e-05	0.000849324	Ryr1	7	-1	29003344	29125179	DE
ENSMUSG00000025017	1.1483	0.620425	14.013	0.000181554	0.00167812	Pik3ap1	19	-1	41274218	41385070	DE
ENSMUSG00000049148	1.14817	0.102644	5.95973	0.0146363	0.0454017	Plcxd3	15	1	4375491	4575553	DE
ENSMUSG00000046169	1.14634	2.65783	15.7289	7.30972e-05	0.000866228	Adamts6	13	1	104287835	104496695	DE
ENSMUSG00000010505	1.14589	4.07011	12.6949	0.00036666	0.00278427	Myt1	2	1	181763332	181827797	DE
ENSMUSG00000085936	1.14368	1.20138	16.9942	3.7494e-05	0.000544122	2610307P16Rik	13	-1	28460034	28885620	DE
ENSMUSG00000025019	1.14243	4.04873	10.3713	0.00127989	0.00712921	Lcor	19	1	41482645	41562246	DE
ENSMUSG00000023795	1.14137	2.84137	18.4778	1.71894e-05	0.000309969	Pisd-ps2	17	-1	3076578	3084183	DE
ENSMUSG00000025255	1.14019	5.84468	18.8016	1.45047e-05	0.000271704	Zfhx4	3	1	5218526	5415857	DE
ENSMUSG00000027868	1.13894	3.3433	10.7745	0.00102907	0.00603292	Tbx15	3	1	99240381	99354259	DE
ENSMUSG00000048747	1.13653	0.816443	10.6926	0.00107564	0.00624237	E130114P18Rik	4	-1	97568133	97778078	DE
ENSMUSG00000059401	1.13069	1.1731	12.5674	0.000392537	0.00293315	Mamld1	X	1	71050256	71156056	DE
ENSMUSG00000022197	1.12744	2.66182	14.9086	0.000112847	0.00119447	Pdzd2	15	-1	12359711	12739924	DE
ENSMUSG00000067879	1.12542	1.62082	10.9958	0.000913184	0.00550892	Vxn	1	1	9601199	9627143	DE
ENSMUSG00000038608	1.12123	1.57365	8.30201	0.00396013	0.0167197	Dock10	1	-1	80501073	80758527	DE
ENSMUSG00000056492	1.11902	4.07542	10.3809	0.00127328	0.00710678	Adgrf5	17	1	43360451	43459557	DE
ENSMUSG00000021010	1.11772	2.51686	11.7749	0.00060034	0.00401487	Npas3	12	1	53248677	54072175	DE
ENSMUSG00000040943	1.1177	3.81909	11.7943	0.000594135	0.00399121	Tet2	3	-1	133463679	133545139	DE
ENSMUSG00000056602	1.11488	2.75325	15.833	6.9186e-05	0.000838003	Fry	5	1	150118645	150497753	DE
ENSMUSG00000027950	1.10599	2.52819	14.834	0.0001174	0.00122599	Chrnb2	3	-1	89746195	89764632	DE
ENSMUSG00000037254	1.10565	2.99224	7.30166	0.00688908	0.0256681	Itih2	2	-1	10094593	10131396	DE
ENSMUSG00000021366	1.10273	5.1118	27.8102	1.33819e-07	9.76793e-06	Hivep1	13	1	42052021	42192537	DE
ENSMUSG00000108434	1.1021	0.419996	7.08328	0.00778066	0.0281084	Gm45768	7	-1	37317899	37321100	DE
ENSMUSG00000062713	1.09517	0.982155	7.40688	0.00649749	0.0245824	Sim2	16	1	94084931	94127032	DE
ENSMUSG00000036466	1.09307	1.00116	8.25277	0.00406899	0.0170542	Megf11	9	1	64385626	64709205	DE
ENSMUSG00000071064	1.09292	4.07969	20.3343	6.50247e-06	0.000156132	Zfp827	8	1	79028437	79193766	DE
ENSMUSG00000103567	1.09149	1.54272	19.2723	1.13337e-05	0.000229272	Pcdhga5	18	1	37694380	37841873	DE
ENSMUSG00000033740	1.09121	3.15093	13.3837	0.000253815	0.00213299	St18	1	1	6487231	6860940	DE
ENSMUSG00000061603	1.08874	3.95592	10.4604	0.00121958	0.00689071	Akap6	12	1	52699383	53155599	DE
ENSMUSG00000025576	1.08607	1.5502	13.4851	0.000240471	0.00205268	Rbfox3	11	-1	118489762	118911597	DE
ENSMUSG00000009350	1.08519	1.76259	9.33643	0.00224643	0.0108529	Mpo	11	1	87793581	87804413	DE
ENSMUSG00000042631	1.08417	2.14902	16.6989	4.38059e-05	0.000607077	Xkr7	2	1	153031852	153055775	DE
ENSMUSG00000096054	1.08381	2.69044	15.1005	0.000101937	0.00110397	Syne1	10	-1	5020917	5551482	DE
ENSMUSG00000020135	1.07954	4.09494	11.5803	0.000666525	0.00433734	Apc2	10	1	80295977	80318263	DE
ENSMUSG00000063919	1.07943	3.64095	14.3126	0.000154823	0.00149983	Srrm4	5	-1	116439275	116591817	DE
ENSMUSG00000009075	1.07942	-0.0451106	7.40201	0.00651511	0.0246304	Cabp7	11	-1	4736892	4746778	DE
ENSMUSG00000026131	1.07761	5.76998	14.5571	0.000135979	0.0013577	Dst	1	1	33908225	34308661	DE
ENSMUSG00000024140	1.07462	4.17303	5.86874	0.0154121	0.0472982	Epas1	17	1	86753700	86833410	DE
ENSMUSG00000034584	1.07171	0.692812	9.20131	0.00241841	0.0114546	Exph5	9	1	53301670	53377514	DE
ENSMUSG00000023192	1.07083	2.18962	10.268	0.00135359	0.007463	Grm2	9	-1	106643095	106656082	DE
ENSMUSG00000054178	1.06975	2.59789	15.4517	8.4642e-05	0.000957028	Gm9938	19	1	23723279	23725034	DE
ENSMUSG00000029361	1.06923	0.544071	12.1274	0.000496869	0.00346257	Nos1	5	1	117781032	117958840	DE
ENSMUSG00000023845	1.0674	4.41031	21.1336	4.28345e-06	0.00011785	Lnpep	17	-1	17521410	17625050	DE
ENSMUSG00000082286	1.06699	4.43963	17.4377	2.96882e-05	0.000459507	Pisd-ps1	11	1	3125904	3131004	DE
ENSMUSG00000020053	1.06522	5.05343	14.4304	0.000145438	0.00142365	Igf1	10	1	87858265	87937042	DE
ENSMUSG00000046743	1.06506	4.91664	13.0776	0.000298852	0.00240092	Fat4	3	1	38886940	39011985	DE
ENSMUSG00000037990	1.06481	0.573272	6.06128	0.0138177	0.043484	Sh3rf3	10	1	58813359	59138916	DE
ENSMUSG00000028028	1.06374	0.9695	13.8253	0.000200616	0.00179798	Alpk1	3	-1	127670310	127780527	DE
ENSMUSG00000110669	1.06197	0.965734	8.71657	0.0031533	0.0141405	Gm10060	8	1	19784746	19784856	DE
ENSMUSG00000009628	1.06168	2.36851	19.0003	1.30699e-05	0.000250791	Tex15	8	1	33516738	33585582	DE
ENSMUSG00000003847	1.05889	5.02943	13.2851	0.000267518	0.00221212	Nfat5	8	1	107293470	107379517	DE
ENSMUSG00000039629	1.05806	0.580419	10.788	0.00102158	0.00599843	Strip2	6	1	29917012	29959681	DE
ENSMUSG00000028053	1.05441	5.40775	17.5727	2.76532e-05	0.000436316	Ash1l	3	1	88950622	89079375	DE
ENSMUSG00000029408	1.0543	0.110442	8.00199	0.00467259	0.0189679	Abcb9	5	-1	124061530	124095798	DE
ENSMUSG00000043013	1.0515	1.14305	9.43553	0.00212822	0.0104436	Onecut1	9	1	74861921	74891781	DE
ENSMUSG00000040663	1.04985	0.0539531	6.9375	0.0084407	0.0298798	Clcf1	19	1	4214238	4223490	DE
ENSMUSG00000055485	1.04974	5.73932	24.1778	8.78376e-07	3.78866e-05	Soga1	2	-1	157015799	157079254	DE
ENSMUSG00000029219	1.04751	1.22693	6.53406	0.0105828	0.0356007	Slc10a4	5	1	73006883	73012955	DE
ENSMUSG00000024298	1.04639	5.01068	10.434	0.00123719	0.00695605	Zfp871	17	-1	32765496	32788287	DE
ENSMUSG00000005089	1.04635	3.48719	14.8424	0.000116876	0.00122157	Slc1a2	2	1	102658659	102790784	DE
ENSMUSG00000006586	1.04582	4.00315	29.0249	7.14542e-08	6.11117e-06	Runx1t1	4	1	13743436	13893649	DE
ENSMUSG00000009145	1.0435	0.250387	7.73973	0.00540189	0.0212597	Dqx1	6	1	83057844	83067318	DE
ENSMUSG00000029368	1.04333	1.91929	6.42047	0.0112812	0.0373534	Alb	5	1	90460897	90476602	DE
ENSMUSG00000034958	1.04295	2.62765	11.7456	0.000609859	0.00405678	Atcay	10	-1	81204508	81230833	DE
ENSMUSG00000019899	1.04264	2.37361	10.7608	0.00103673	0.00606125	Lama2	10	-1	26980036	27619758	DE
ENSMUSG00000054932	1.03615	5.82686	9.17849	0.00244876	0.0115653	Afp	5	1	90490737	90508907	DE
ENSMUSG00000059149	1.03132	2.56172	12.8176	0.00034337	0.00265318	Mfsd4a	1	-1	132022806	132068062	DE
ENSMUSG00000095403	1.03126	0.273085	10.2037	0.00140158	0.00766747	Gm21092	8	1	20567597	20582771	DE
ENSMUSG00000027612	1.0311	1.23383	6.47464	0.0109425	0.0364838	Mmp24	2	1	155775342	155818366	DE
ENSMUSG00000038056	1.02979	5.3546	19.0344	1.28386e-05	0.000247623	Kmt2c	5	-1	25271798	25498783	DE
ENSMUSG00000113432	1.02973	-0.0758337	8.58075	0.00339735	0.0149334	8430406P12Rik	13	-1	17735985	17737054	DE
ENSMUSG00000038872	1.02496	4.31258	15.3724	8.82696e-05	0.00098844	Zfhx3	8	1	107942644	108961630	DE
ENSMUSG00000001985	1.02492	2.27612	12.8354	0.000340118	0.00263759	Grik3	4	1	125490700	125714173	DE
ENSMUSG00000032855	1.02446	4.88392	18.812	1.44258e-05	0.000270565	Pkd1	17	1	24549834	24596508	DE
ENSMUSG00000019726	1.02359	3.71366	17.8924	2.33758e-05	0.000384467	Lyst	13	1	13590397	13778803	DE
ENSMUSG00000056553	1.02351	2.41955	14.1569	0.000168178	0.00159514	Ptprn2	12	1	116485720	117276849	DE
ENSMUSG00000096780	1.02306	2.14965	12.2614	0.00046243	0.00328753	Tmem181b-ps	17	-1	6438524	6467022	DE
ENSMUSG00000035864	1.02289	1.35929	8.56235	0.00343187	0.0150542	Syt1	10	-1	108497650	109010982	DE
ENSMUSG00000019841	1.02199	6.05154	19.5785	9.65499e-06	0.000206733	Rev3l	10	1	39732118	39875211	DE
ENSMUSG00000002028	1.02166	5.60849	16.6281	4.54715e-05	0.000621527	Kmt2a	9	-1	44803355	44881296	DE
ENSMUSG00000040327	1.02098	2.02282	10.9904	0.000915839	0.00552271	Cul9	17	-1	46500572	46546388	DE
ENSMUSG00000004360	1.02097	2.71293	11.7885	0.000595991	0.00399871	9330159F19Rik	10	1	29211606	29230779	DE
ENSMUSG00000033220	1.01307	0.957503	6.85052	0.00886153	0.0310537	Rac2	15	-1	78559167	78572783	DE
ENSMUSG00000097392	1.01177	3.77537	14.4536	0.000143657	0.00141362	D930016D06Rik	5	1	104525735	104554207	DE
ENSMUSG00000052387	1.00941	0.703202	11.0026	0.000909821	0.00549084	Trpm3	19	1	22139119	22989884	DE
ENSMUSG00000047907	1.00867	1.17755	10.1115	0.0014735	0.00793877	Tshz2	2	1	169633013	170071816	DE
ENSMUSG00000040907	1.00773	2.02616	9.41093	0.00215695	0.0105278	Atp1a3	7	-1	24978167	25005958	DE
ENSMUSG00000023064	1.00498	2.97388	7.50272	0.0061606	0.0236122	Sncg	14	-1	34370274	34374789	DE
ENSMUSG00000032525	1.00458	5.7846	14.2829	0.00015729	0.00151588	Nktr	9	1	121719169	121756843	DE
ENSMUSG00000036198	1.00453	2.26881	13.7481	0.00020903	0.00185	Arhgap36	X	1	49463945	49500244	DE
ENSMUSG00000015243	1.00237	3.87924	26.9624	2.07453e-07	1.33394e-05	Abca1	4	-1	53030787	53159895	DE
ENSMUSG00000034336	1.00136	5.42558	15.7671	7.16367e-05	0.000854332	Ina	19	1	47014698	47025327	DE
ENSMUSG00000030616	1.00103	2.22492	20.2364	6.84369e-06	0.000160297	Sytl2	7	1	90302252	90410719	DE
ENSMUSG00000061848	-1.00087	4.52984	11.7835	0.000597577	0.00400321	Gm5805	15	1	81972390	81972845	DE
ENSMUSG00000060730	-1.00513	0.6977	7.72316	0.00545168	0.0213824	Gm10086	5	1	108517179	108517532	DE
ENSMUSG00000031074	-1.01452	0.917727	11.0439	0.000889776	0.00540254	Fgf3	7	1	144838083	144844436	DE
ENSMUSG00000061833	-1.01824	3.74347	18.1889	2.00037e-05	0.00034295	Gm6311	13	1	75954136	75955013	DE
ENSMUSG00000006311	-1.02817	-0.0796424	6.56614	0.0103937	0.0351316	Etv2	7	-1	30633616	30635852	DE
ENSMUSG00000083820	-1.03178	0.438114	9.80531	0.00174009	0.00897704	Ndufs6b	7	-1	81161397	81161744	DE
ENSMUSG00000051116	-1.03744	2.52557	16.9319	3.8745e-05	0.000555456	Gm8121	5	1	57608569	57609067	DE
ENSMUSG00000031762	-1.04248	4.63487	45.102	1.8703e-11	2.15329e-08	Mt2	8	1	94172664	94173568	DE
ENSMUSG00000085700	-1.05484	4.6762	7.3722	0.00662399	0.0249472	Hbb-bh0	7	-1	103850020	103850148	DE
ENSMUSG00000062284	-1.0585	1.02348	17.313	3.17014e-05	0.000479752	Gm6030	16	1	45205100	45205489	DE
ENSMUSG00000052217	-1.06228	11.9425	20.3569	6.42609e-06	0.000156055	Hbb-bh1	7	-1	103841637	103843164	DE
ENSMUSG00000083044	-1.07488	0.16973	9.65165	0.00189181	0.00955612	Gm12416	4	1	84104895	84105902	DE
ENSMUSG00000084235	-1.07609	3.0335	19.1967	1.17914e-05	0.000234997	Gm15421	5	-1	22528321	22529244	DE
ENSMUSG00000082481	-1.07857	0.856563	6.50546	0.0107544	0.0360363	Rps12-ps19	11	-1	75070814	75071213	DE
ENSMUSG00000062327	-1.09363	2.62957	7.6656	0.00562834	0.0219202	T	17	1	8434423	8442496	DE
ENSMUSG00000082792	-1.1051	0.14793	12.5977	0.00038622	0.00289607	Gm12176	11	1	47541432	47542306	DE
ENSMUSG00000106718	-1.1059	0.441623	12.9941	0.000312468	0.00247707	Gm20052	5	1	37893772	37897917	DE
ENSMUSG00000049751	-1.10861	2.15484	22.66	1.93349e-06	6.72991e-05	Rpl36al	12	-1	69182731	69184083	DE
ENSMUSG00000068324	-1.11623	0.528469	15.9237	6.59491e-05	0.000811728	Gm10029	13	-1	6662565	6662894	DE
ENSMUSG00000101939	-1.12189	2.95642	12.9692	0.000316662	0.00250104	Gm28438	1	-1	24612775	24613119	DE
ENSMUSG00000029646	-1.15817	2.57916	11.0763	0.000874401	0.00532648	Cdx2	5	-1	147300805	147307270	DE
ENSMUSG00000088246	-1.16123	0.31816	13.5154	0.00023662	0.00202834	Gm25911	1	-1	167340369	167340424	DE
ENSMUSG00000098973	-1.16841	6.28035	44.4362	2.6278e-11	2.31964e-08	Mir6236	9	1	110281287	110281409	DE
ENSMUSG00000109509	-1.17571	4.80024	25.259	5.01241e-07	2.51748e-05	Rps12-ps4	7	-1	30484701	30485097	DE
ENSMUSG00000033837	-1.1823	1.11781	16.7408	4.28489e-05	0.000596022	Foxh1	15	-1	76668225	76669948	DE
ENSMUSG00000094989	-1.21599	6.17586	26.0667	3.2982e-07	1.8628e-05	Rpl9-ps4	13	-1	72454762	72455340	DE
ENSMUSG00000064348	-1.22391	0.462231	10.898	0.000962705	0.00571098	mt-Tn	MT	-1	5089	5159	DE
ENSMUSG00000066407	-1.2461	2.41132	13.1129	0.000293262	0.0023649	Gm10263	13	1	73317844	73318143	DE
ENSMUSG00000025491	-1.28592	3.46035	24.6903	6.73222e-07	3.08449e-05	Ifitm1	7	1	140967221	140969825	DE
ENSMUSG00000098181	-1.29919	2.74499	27.4139	1.64249e-07	1.1434e-05	Rps12-ps24	8	1	36025753	36026133	DE
ENSMUSG00000106106	-1.33331	10.1265	53.9111	2.09774e-13	1.32771e-09		17	-1	39846353	39848827	DE
ENSMUSG00000091957	-1.37561	7.15704	20.2184	6.90866e-06	0.000161395	Rps2-ps10	18	-1	61259008	61259972	DE
ENSMUSG00000065037	-1.54252	1.22509	32.8772	9.81656e-09	1.49923e-06	Rn7sk	9	-1	78175303	78175633	DE
ENSMUSG00000096001	-1.54862	1.94622	19.054	1.27073e-05	0.000246041	2610528A11Rik	14	-1	37102140	37114022	DE
ENSMUSG00000032715	-1.55321	3.59129	35.5631	2.46919e-09	5.6856e-07	Trib3	2	-1	152337422	152344032	DE
ENSMUSG00000010760	-1.55449	1.53264	22.7041	1.88968e-06	6.63918e-05	Phlda2	7	-1	143501545	143503150	DE
ENSMUSG00000031326	-1.71389	2.23612	8.70284	0.00317714	0.0141954	Cdx4	X	1	103321398	103330592	DE
ENSMUSG00000088088	-1.87855	0.0943262	29.3583	6.01595e-08	5.42414e-06	Rmrp	4	-1	43492788	43493058	DE
ENSMUSG00000094344	-2.48939	5.53818	13.8275	0.000200379	0.00179693	Gm11942	4	1	32964888	32965232	DE
ENSMUSG00000108558	3.20277	2.83611	5.44533	0.0196207	0.0568344	Psg-ps1	7	1	17672292	17682060	non-DE
ENSMUSG00000070798	3.15275	2.51432	5.25944	0.021828	0.0615486	Psg25	7	-1	18519702	18532269	non-DE
ENSMUSG00000030373	3.13197	2.69524	5.57937	0.0181732	0.053633	Psg28	7	-1	18422536	18432041	non-DE
ENSMUSG00000023185	3.04556	4.06878	5.45365	0.0195275	0.0566081	Ceacam14	7	1	17812633	17815663	non-DE
ENSMUSG00000008789	3.03688	4.45654	5.61517	0.0178057	0.052751	Ceacam5	7	1	17713238	17761132	non-DE
ENSMUSG00000030368	3.03334	3.72116	5.26395	0.0217716	0.0614589	Ceacam11	7	1	17972124	17978556	non-DE
ENSMUSG00000078793	2.98	2.64757	4.80334	0.0284046	0.0755386	Gm5155	7	1	17871767	17919010	non-DE
ENSMUSG00000069258	2.96023	5.71225	5.24943	0.021954	0.0618456	Prl2b1	13	-1	27383339	27390846	non-DE
ENSMUSG00000074359	2.9367	4.20429	5.24374	0.0220259	0.0620014	Psg23	7	-1	18606343	18616501	non-DE
ENSMUSG00000038891	2.87738	6.10068	5.46135	0.0194416	0.0564685	Prl3b1	13	1	27241847	27249683	non-DE
ENSMUSG00000070797	2.86708	3.96838	4.55903	0.0327455	0.0842825	Psg27	7	-1	18556514	18567305	non-DE
ENSMUSG00000055360	2.8111	3.15595	5.30179	0.0213035	0.0605133	Prl2c5	13	1	13182715	13191923	non-DE
ENSMUSG00000070796	2.77295	4.63276	4.78165	0.0287645	0.0763061	Psg21	7	-1	18646736	18656725	non-DE
ENSMUSG00000066760	2.75222	2.83314	4.24899	0.0392737	0.0967428	Psg16	7	1	17074040	17133450	non-DE
ENSMUSG00000033834	2.7278	6.30119	4.95362	0.0260361	0.070416	Tpbpa	13	-1	60938492	60941984	non-DE
ENSMUSG00000028965	2.49733	3.08145	4.41381	0.0356491	0.0899007	Tnfrsf9	4	1	150914562	150946102	non-DE
ENSMUSG00000023159	2.19602	1.85821	3.46011	0.0628662	0.13833	Psg29	7	1	17203477	17215760	non-DE
ENSMUSG00000001123	2.08245	2.30762	4.21603	0.0400438	0.0981873	Lgals9	11	-1	78962974	78984946	non-DE
ENSMUSG00000050335	2.03931	1.61164	3.98372	0.045942	0.10918	Lgals3	14	1	47367751	47386160	non-DE
ENSMUSG00000092274	1.87572	1.16799	4.00937	0.0452481	0.107861	Neat1	19	-1	5824708	5845478	non-DE
ENSMUSG00000009281	1.78473	2.29104	4.00421	0.0453869	0.108066	Rarres2	6	-1	48569696	48572789	non-DE
ENSMUSG00000021403	1.74344	1.66573	2.20944	0.137169	0.248307	Serpinb9b	13	1	33027416	33041884	non-DE
ENSMUSG00000054753	1.70825	1.17701	4.21734	0.0400128	0.0981274	AU018091	7	-1	3154658	3169203	non-DE
ENSMUSG00000046352	1.63963	4.07786	4.67322	0.0306365	0.0800797	Gjb2	14	-1	57098600	57104702	non-DE
ENSMUSG00000038580	1.47688	2.12964	2.82061	0.0930608	0.185751	Sct	7	-1	141278330	141279133	non-DE
ENSMUSG00000021280	1.36564	1.85834	3.22186	0.072661	0.154521	Exoc3l4	12	1	111417017	111431678	non-DE
ENSMUSG00000027463	1.31549	0.906249	3.25663	0.0711352	0.151967	Slc52a3	2	1	151996511	152009258	non-DE
ENSMUSG00000061186	1.29749	2.44576	4.44701	0.0349624	0.0885268	Sfmbt2	2	1	10370510	10595253	non-DE
ENSMUSG00000026979	1.28026	1.42187	4.18809	0.040709	0.0995413	Psd4	2	1	24367580	24414954	non-DE
ENSMUSG00000018387	1.27549	1.08723	5.67787	0.0171802	0.0514067	Shroom1	11	1	53457205	53467766	non-DE
ENSMUSG00000062480	1.25874	0.871044	3.33916	0.0676493	0.146274	Acat3	17	-1	12923813	12940600	non-DE
ENSMUSG00000030214	1.25766	1.9199	2.88853	0.0892125	0.180355	Plbd1	6	-1	136612070	136661928	non-DE
ENSMUSG00000038963	1.23757	1.89445	4.22616	0.0398053	0.0977147	Slco4a1	2	1	180456245	180474867	non-DE
ENSMUSG00000020826	1.22302	1.08457	5.06174	0.0244596	0.0671104	Nos2	11	1	78920787	78960254	non-DE
ENSMUSG00000018507	1.20117	1.62623	3.9426	0.0470781	0.111261	Trpv2	11	1	62574486	62600515	non-DE
ENSMUSG00000093738	1.15923	0.809636	4.54954	0.0329275	0.0847218	AI606473	3	1	154330821	154334254	non-DE
ENSMUSG00000031179	1.12703	1.53234	1.63503	0.201008	0.329697	3830417A13Rik	X	1	64173548	64178778	non-DE
ENSMUSG00000027611	1.11295	2.14152	3.43289	0.0639101	0.140091	Procr	2	1	155751117	155755471	non-DE
ENSMUSG00000037411	1.10809	2.30642	1.81967	0.177353	0.300412	Serpine1	5	-1	137061504	137072268	non-DE
ENSMUSG00000110631	1.10063	2.41621	1.57638	0.209283	0.339622	Gm42047	8	1	121833247	121841178	non-DE
ENSMUSG00000034450	1.09672	0.782362	5.1253	0.0235795	0.0654273	Gulo	14	-1	65986786	66009207	non-DE
ENSMUSG00000021095	1.08546	1.0177	4.9204	0.0265414	0.0715629	Gsc	12	-1	104471209	104473330	non-DE
ENSMUSG00000069516	1.08086	0.908109	3.2035	0.0734808	0.155865	Lyz2	10	-1	117277331	117282321	non-DE
ENSMUSG00000043099	1.0729	1.86451	4.72075	0.0298008	0.0785122	Hic1	11	-1	75164565	75169519	non-DE
ENSMUSG00000034762	1.05915	0.822348	4.12452	0.042266	0.102544	Glis1	4	1	107434591	107635061	non-DE
ENSMUSG00000037280	1.03167	0.521133	4.98039	0.0256362	0.0695355	Galnt6	15	-1	100691813	100729376	non-DE
ENSMUSG00000027460	1.031	0.938995	4.31859	0.0376981	0.0937723	Angpt4	2	1	151911210	151945337	non-DE
ENSMUSG00000087396	1.0295	1.45517	4.36046	0.0367823	0.0920142	4933407K13Rik	X	-1	75706932	75764699	non-DE
ENSMUSG00000106874	1.02661	0.0776671	5.30793	0.0212285	0.06037	Gm20186	6	-1	18845910	18848207	non-DE
ENSMUSG00000020641	1.02554	0.888623	2.23553	0.13487	0.245125	Rsad2	12	-1	26442746	26456452	non-DE
ENSMUSG00000026672	1.02469	2.15593	4.72498	0.0297275	0.0783745	Optn	2	-1	5020642	5064051	non-DE
ENSMUSG00000066800	1.0226	2.30408	5.43128	0.0197792	0.0571828	Rnasel	1	1	153749426	153764221	non-DE
ENSMUSG00000034258	1.01969	1.11458	2.76318	0.0964563	0.190507	Flvcr2	12	1	85746539	85813585	non-DE
ENSMUSG00000004110	1.01049	0.526721	4.11368	0.0425376	0.102964	Cacna1e	1	-1	154390731	154884501	non-DE
ENSMUSG00000029330	1.00672	1.7914	2.84185	0.0918387	0.184157	Cds1	5	1	101765130	101823858	non-DE
ENSMUSG00000074657	0.998748	3.79465	12.4698	0.000413587	0.00304185	Kif5a	10	-1	127225696	127263348	non-DE
ENSMUSG00000053877	0.99808	2.67899	10.4429	0.00123123	0.00693557	Srcap	7	1	127511983	127561219	non-DE
ENSMUSG00000074817	0.997958	-0.00762262	8.10419	0.00441629	0.018154	Papolb	5	-1	142525838	142530076	non-DE
ENSMUSG00000066842	0.997579	4.16181	13.9273	0.000190022	0.00173948	Hmcn1	1	-1	150562524	150993435	non-DE
ENSMUSG00000058897	0.995656	3.45898	14.1627	0.000167662	0.00159125	Col25a1	3	1	130131501	130599877	non-DE
ENSMUSG00000052160	0.99221	0.666155	3.94991	0.0468739	0.110954	Pld4	12	1	112760655	112768990	non-DE
ENSMUSG00000049690	0.991827	2.90562	16.6165	4.57513e-05	0.000622509	Nckap5	1	-1	125913620	126830799	non-DE
ENSMUSG00000045672	0.98992	3.16777	7.58612	0.00588194	0.0227598	Col27a1	4	1	63214004	63334991	non-DE
ENSMUSG00000109115	0.987983	0.368214	7.29424	0.0069176	0.0257132	Gm44669	7	-1	67679335	67681303	non-DE
ENSMUSG00000026442	0.986237	3.5653	14.3055	0.000155407	0.00150451	Nfasc	1	-1	132564690	132741797	non-DE
ENSMUSG00000027438	0.98431	2.644	13.702	0.000214225	0.00188063	Napb	2	-1	148693985	148732467	non-DE
ENSMUSG00000015222	0.982212	5.74527	17.0712	3.60038e-05	0.000528821	Map2	1	1	66175273	66442583	non-DE
ENSMUSG00000000948	0.979544	2.26278	3.64552	0.0562201	0.127434	Gm38393	7	-1	59974149	60005064	non-DE
ENSMUSG00000068394	0.97874	3.99902	17.2231	3.32365e-05	0.000496458	Cep152	2	-1	125563088	125625113	non-DE
ENSMUSG00000022066	0.978137	0.843905	1.46658	0.225886	0.359091	Entpd4b	14	1	69555424	69585520	non-DE
ENSMUSG00000030223	0.977692	1.25677	6.73543	0.00945166	0.0326252	Ptpro	6	1	137252319	137463233	non-DE
ENSMUSG00000006411	0.97738	0.774591	6.68494	0.00972307	0.0333315	Nectin4	1	1	171370099	171388598	non-DE
ENSMUSG00000090061	0.976953	0.23771	4.03148	0.0446587	0.106757	Nwd2	5	1	63649102	63810546	non-DE
ENSMUSG00000034384	0.975288	1.03474	5.50547	0.0189571	0.0553404	Barhl2	5	-1	106452523	106458166	non-DE
ENSMUSG00000036745	0.974835	3.06381	12.2434	0.000466903	0.00330821	Ttll7	3	1	146852367	146984009	non-DE
ENSMUSG00000029843	0.974642	2.14609	1.56585	0.210811	0.341332	Slc13a4	6	-1	35267957	35308131	non-DE
ENSMUSG00000029004	0.974075	6.23347	16.3341	5.30997e-05	0.000695169	Kmt2e	5	1	23434441	23504235	non-DE
ENSMUSG00000047959	0.973515	0.750325	9.90722	0.00164631	0.00859747	Kcna3	3	1	107036169	107038070	non-DE
ENSMUSG00000102602	0.973083	0.389899	5.32008	0.021081	0.0600646	A930004J17Rik	4	1	131878628	131883237	non-DE
ENSMUSG00000028137	0.97144	3.87414	10.9067	0.000958194	0.00569099	Celf3	3	1	94478295	94492198	non-DE
ENSMUSG00000016624	0.970811	4.47909	15.6431	7.64896e-05	0.000891604	Phf21b	15	-1	84785381	84856049	non-DE
ENSMUSG00000040761	0.96867	5.76729	21.8311	2.97739e-06	9.13169e-05	Spen	4	-1	141467890	141538597	non-DE
ENSMUSG00000039410	0.966515	3.58457	13.0359	0.000305581	0.00243639	Prdm16	4	-1	154316125	154636873	non-DE
ENSMUSG00000034647	0.965624	3.21966	9.04594	0.00263279	0.0122224	Ankrd12	17	-1	65965698	66077089	non-DE
ENSMUSG00000040225	0.963285	7.77924	28.2665	1.0571e-07	8.32713e-06	Prrc2c	1	-1	162670725	162740556	non-DE
ENSMUSG00000068196	0.961402	0.862771	12.6867	0.000368257	0.00279073	Col8a1	16	-1	57624258	57754737	non-DE
ENSMUSG00000052229	0.959564	0.889663	7.44911	0.00634678	0.0241465	Gpr17	18	-1	31942997	31949636	non-DE
ENSMUSG00000024330	0.957956	0.647569	5.56544	0.0183184	0.053939	Col11a2	17	1	34039437	34066685	non-DE
ENSMUSG00000020256	0.957641	1.32849	7.18836	0.0073378	0.0269047	Aldh1l2	10	-1	83487450	83534140	non-DE
ENSMUSG00000034422	0.956559	0.434204	3.35245	0.0671052	0.145412	Parp14	16	-1	35832874	35871544	non-DE
ENSMUSG00000050558	0.955544	0.672557	11.0107	0.00090587	0.00547804	Prokr2	2	-1	132337733	132385447	non-DE
ENSMUSG00000022330	0.955293	0.356449	5.43652	0.0197199	0.0570996	Osr2	15	1	35296098	35303305	non-DE
ENSMUSG00000062760	0.95489	2.38375	13.2753	0.000268923	0.00222128	Shisal1	15	-1	84379203	84447097	non-DE
ENSMUSG00000055980	0.953855	4.94737	25.0314	5.64039e-07	2.7409e-05	Irs1	1	-1	82233101	82291416	non-DE
ENSMUSG00000033569	0.953707	1.8105	14.6063	0.000132473	0.00134058	Adgrb3	1	-1	25067476	25829707	non-DE
ENSMUSG00000048540	0.953327	4.66525	10.6783	0.00108402	0.00627398	Nhlh2	3	1	102010076	102015492	non-DE
ENSMUSG00000027861	0.952505	1.12298	7.03241	0.00800477	0.0287515	Casq2	3	1	102086415	102146514	non-DE
ENSMUSG00000046138	0.951802	5.2629	17.104	3.53876e-05	0.000520281	9930021J03Rik	19	-1	29714402	29805989	non-DE
ENSMUSG00000044912	0.950641	0.318045	6.27709	0.0122309	0.0396662	Syt16	12	1	73997661	74273267	non-DE
ENSMUSG00000023959	0.949985	1.24091	6.37075	0.0116016	0.0381966	Clic5	17	1	44188584	44280172	non-DE
ENSMUSG00000032332	0.949466	4.09022	26.0787	3.27789e-07	1.85834e-05	Col12a1	9	-1	79598991	79718831	non-DE
ENSMUSG00000114827	0.949116	1.91875	0.854623	0.355248	0.496405	Gm46432	13	-1	84281179	84281816	non-DE
ENSMUSG00000063568	0.948578	1.11561	9.07317	0.00259388	0.0121056	Jazf1	6	-1	52768797	53068631	non-DE
ENSMUSG00000039860	0.947848	1.43305	6.75468	0.0093502	0.032345	Srrm3	5	1	135806890	135874772	non-DE
ENSMUSG00000049658	0.945918	5.6321	15.0566	0.000104335	0.00112749	Bdp1	13	-1	100017994	100104070	non-DE
ENSMUSG00000020181	0.943263	2.57627	14.0789	0.000175298	0.00164224	Nav3	10	-1	109681259	110456204	non-DE
ENSMUSG00000040253	0.943089	0.862503	4.30911	0.0379088	0.09414	Gbp7	3	1	142530342	142550149	non-DE
ENSMUSG00000051166	0.942511	3.14843	11.6113	0.000655506	0.00428613	Eml5	12	-1	98786805	98901484	non-DE
ENSMUSG00000038831	0.941437	3.02837	11.1632	0.000834345	0.00512629	Ralgps1	2	-1	33133417	33371486	non-DE
ENSMUSG00000105265	0.940387	2.29718	5.9865	0.0144158	0.0449971	Sox2ot	3	1	34104270	34682619	non-DE
ENSMUSG00000025777	0.939821	2.2998	8.72711	0.00313514	0.0140827	Gdap1	1	1	17145362	17164271	non-DE
ENSMUSG00000064369	0.937832	0.0931492	2.3532	0.125026	0.231846	mt-Te	MT	-1	14071	14139	non-DE
ENSMUSG00000052504	0.936346	5.48582	12.8324	0.000340667	0.00263911	Epha3	16	-1	63543534	63864175	non-DE
ENSMUSG00000091754	0.936275	0.582548	8.6188	0.00332711	0.0147067	Gm3636	14	-1	6735685	6742332	non-DE
ENSMUSG00000040481	0.934267	6.93201	26.9492	2.08879e-07	1.33394e-05	Bptf	11	-1	107033081	107132127	non-DE
ENSMUSG00000047787	0.934171	1.31746	10.623	0.00111691	0.0064246	Flrt1	19	-1	7092014	7105729	non-DE
ENSMUSG00000059326	0.933321	1.77663	10.4131	0.00125123	0.0070104	Csf2ra	19	-1	61224402	61228418	non-DE
ENSMUSG00000038473	0.932957	1.79004	16.4987	4.8683e-05	0.00065209	Nos1ap	1	-1	170302668	170589861	non-DE
ENSMUSG00000087620	0.932307	0.416315	5.18274	0.0228123	0.0636643	5330434G04Rik	X	-1	105348282	105391776	non-DE
ENSMUSG00000063681	0.932172	1.34519	6.52349	0.0106459	0.0357498	Crb1	1	-1	139197056	139377100	non-DE
ENSMUSG00000052920	0.931711	2.62659	11.3076	0.000771885	0.00484597	Prkg1	19	-1	30567551	31765033	non-DE
ENSMUSG00000061601	0.931059	1.26665	3.52332	0.060511	0.134612	Pclo	5	1	14514918	14863459	non-DE
ENSMUSG00000034310	0.931027	0.587073	8.70012	0.0031819	0.0142032	Tmem132d	5	-1	127781630	128433077	non-DE
ENSMUSG00000034161	0.930314	1.52684	5.04164	0.0247451	0.067695	Scx	15	1	76457452	76459458	non-DE
ENSMUSG00000061755	0.928124	5.39406	17.9826	2.22935e-05	0.000370325	Bod1l	5	-1	41787538	41844315	non-DE
ENSMUSG00000035298	0.924053	0.870847	5.60258	0.0179341	0.0530495	Klhl35	7	1	99466004	99474022	non-DE
ENSMUSG00000036256	0.92336	1.26872	1.92175	0.165664	0.285656	Igfbp7	5	-1	77349240	77408041	non-DE
ENSMUSG00000000197	0.922151	0.772586	10.2049	0.00140068	0.00766747	Nalcn	14	-1	123276634	123627144	non-DE
ENSMUSG00000052854	0.921844	5.01225	4.49761	0.0339423	0.0867659	Nrk	X	1	138914430	139010532	non-DE
ENSMUSG00000044037	0.920623	0.924064	7.03942	0.0079735	0.0286615	Als2cl	9	1	110879870	110900530	non-DE
ENSMUSG00000000416	0.919826	2.97219	14.1203	0.000171479	0.00161518	Cttnbp2	6	-1	18366478	18514843	non-DE
ENSMUSG00000081739	0.919781	0.166656	7.27658	0.00698592	0.0259257	Mdm4-ps	X	1	128261411	128267924	non-DE
ENSMUSG00000033510	0.919239	0.573435	7.44675	0.0063551	0.024172	Otud7a	7	1	63444751	63759028	non-DE
ENSMUSG00000033419	0.918611	2.89978	4.42927	0.0353276	0.0892251	Snap91	9	-1	86765923	86880654	non-DE
ENSMUSG00000057110	0.91813	5.86989	19.7566	8.79554e-06	0.000194233	Cntrl	2	1	35109492	35178822	non-DE
ENSMUSG00000056972	0.917985	2.35625	8.14869	0.00430922	0.0178314	Magel2	7	1	62377010	62381640	non-DE
ENSMUSG00000069793	0.917829	3.8554	27.2658	1.77317e-07	1.19825e-05	Slfn9	11	-1	82978390	82991830	non-DE
ENSMUSG00000027386	0.917744	2.23572	2.31344	0.12826	0.235987	Fbln7	2	1	128862981	128897034	non-DE
ENSMUSG00000040372	0.917477	1.41068	8.07156	0.00449654	0.0183829	Gpr63	4	1	24966407	25009233	non-DE
ENSMUSG00000020941	0.916178	1.88717	10.0022	0.00156354	0.00831637	Map3k14	11	-1	103219762	103267472	non-DE
ENSMUSG00000019230	0.915768	3.8192	12.8237	0.000342253	0.00264729	Lhx9	1	-1	138825186	138848577	non-DE
ENSMUSG00000042759	0.915718	0.848976	1.47523	0.224523	0.357911	Apobr	7	1	126584942	126589112	non-DE
ENSMUSG00000052302	0.915556	1.82691	7.35984	0.00666967	0.0250628	Tbc1d30	10	-1	121263820	121351278	non-DE
ENSMUSG00000053580	0.915458	4.70355	17.5588	2.78565e-05	0.00043841	Tanc2	11	1	105589986	105929304	non-DE
ENSMUSG00000026987	0.914202	5.72981	14.198	0.000164549	0.00156766	Baz2b	2	-1	59899363	60209839	non-DE
ENSMUSG00000031540	0.909528	6.8075	29.418	5.83319e-08	5.3235e-06	Kat6a	8	1	22859535	22943259	non-DE
ENSMUSG00000025959	0.90889	3.26977	15.7638	7.17628e-05	0.000854474	Klf7	1	-1	64029447	64122282	non-DE
ENSMUSG00000028337	0.908607	2.18402	13.1583	0.000286246	0.00232713	Coro2a	4	-1	46536937	46602202	non-DE
ENSMUSG00000035356	0.908064	1.6134	9.49215	0.00206353	0.0101964	Nfkbiz	16	-1	55811375	55838899	non-DE
ENSMUSG00000000183	0.90776	0.339495	4.38051	0.0363521	0.0912276	Fgf6	6	1	127015586	127028187	non-DE
ENSMUSG00000085433	0.907087	-0.0180468	4.84215	0.0277723	0.0741998	Gm16001	5	-1	124111109	124112264	non-DE
ENSMUSG00000052783	0.906626	0.205717	7.77434	0.00529936	0.0209166	Grk4	5	1	34660379	34755305	non-DE
ENSMUSG00000030411	0.903026	3.38735	13.8325	0.000199847	0.00179431	Nova2	7	1	18925888	18965319	non-DE
ENSMUSG00000037386	0.90282	2.90045	19.04	1.28007e-05	0.000247211	Rims2	15	1	39198261	39684372	non-DE
ENSMUSG00000107182	0.902393	0.629047	5.68599	0.0171009	0.0512	Gm43268	5	1	53905164	53909218	non-DE
ENSMUSG00000108866	0.901729	0.125302	0.278656	0.597583	0.711029	Gm35082	7	1	100675088	100677760	non-DE
ENSMUSG00000032625	0.901525	3.50515	11.9012	0.000560988	0.00379408	Thsd7a	6	-1	12311610	12749410	non-DE
ENSMUSG00000046607	0.900862	0.386542	4.50377	0.0338203	0.0865131	Hrk	5	1	118164648	118189478	non-DE
ENSMUSG00000047747	0.900687	4.31514	14.7095	0.000125411	0.00128652	Rnf150	8	1	82863356	83091268	non-DE
ENSMUSG00000019913	0.89974	2.60433	10.142	0.0014493	0.00785363	Sim1	10	1	50894754	50989152	non-DE
ENSMUSG00000023912	0.897899	1.66686	10.9197	0.000951466	0.00566001	Slc25a27	17	-1	43641891	43667214	non-DE
ENSMUSG00000010461	0.897642	3.42732	17.7969	2.45785e-05	0.000398261	Eya4	10	-1	23102963	23350786	non-DE
ENSMUSG00000052557	0.897332	4.56196	16.1388	5.88645e-05	0.000745995	Gan	8	1	117158135	117215997	non-DE
ENSMUSG00000051177	0.896868	2.44596	14.4246	0.000145883	0.00142708	Plcb1	2	1	134786067	135475258	non-DE
ENSMUSG00000026365	0.896136	0.416188	5.76131	0.0163829	0.0495358	Cfh	1	-1	140084708	140183764	non-DE
ENSMUSG00000082381	0.894128	0.135652	7.18555	0.00734929	0.0269402	Gm12928	4	-1	126476727	126477299	non-DE
ENSMUSG00000029553	0.893242	0.254545	5.75277	0.0164626	0.0497106	Tfec	6	-1	16833373	16898441	non-DE
ENSMUSG00000095180	0.892546	1.60413	1.75021	0.185851	0.311214	Rhox5	X	1	37804842	37808876	non-DE
ENSMUSG00000017692	0.892399	4.49883	20.4633	6.07864e-06	0.000150877	Rhbdl3	11	1	80300912	80355955	non-DE
ENSMUSG00000046961	0.891938	0.809984	6.36103	0.0116654	0.0383558	Gpr156	16	1	37916496	38007530	non-DE
ENSMUSG00000038708	0.891267	6.21263	19.4407	1.03774e-05	0.000217229	Golga4	9	1	118506267	118582519	non-DE
ENSMUSG00000102189	0.890951	0.670299	4.37692	0.0364287	0.0913299	Gm37194	14	1	50061360	50064390	non-DE
ENSMUSG00000041482	0.890606	3.42813	13.4435	0.00024586	0.00208467	Piezo2	18	-1	63010213	63387183	non-DE
ENSMUSG00000016239	0.889649	0.967293	2.05592	0.151616	0.266906	Lonrf3	X	1	36328353	36362341	non-DE
ENSMUSG00000052707	0.888651	6.97617	25.9053	3.58585e-07	1.95783e-05	Tnrc6a	7	1	123123885	123195296	non-DE
ENSMUSG00000031391	0.88722	2.74362	10.7238	0.00105766	0.00615477	L1cam	X	-1	73853778	73896105	non-DE
ENSMUSG00000022237	0.886323	1.36584	3.03138	0.0816687	0.168406	Ankrd33b	15	-1	31291478	31367726	non-DE
ENSMUSG00000027009	0.885744	4.96214	26.2643	2.97737e-07	1.73394e-05	Itga4	2	1	79255426	79333123	non-DE
ENSMUSG00000028358	0.885456	5.62727	23.884	1.02319e-06	4.28964e-05	Zfp618	4	1	62965573	63139708	non-DE
ENSMUSG00000090053	0.885053	0.893054	10.8191	0.0010046	0.00592431	Palm2	4	1	57434247	57712016	non-DE
ENSMUSG00000034949	0.884245	0.46676	5.41332	0.0199836	0.0576291	Zfr2	10	1	81233155	81252123	non-DE
ENSMUSG00000024548	0.883378	5.16307	14.3637	0.000150683	0.00146351	Setbp1	18	-1	78750380	79109391	non-DE
ENSMUSG00000052085	0.883149	2.68113	8.06298	0.00451789	0.0184399	Dock8	19	1	24999529	25202432	non-DE
ENSMUSG00000029675	0.882859	1.71074	5.02778	0.0249438	0.0681017	Eln	5	-1	134702593	134747323	non-DE
ENSMUSG00000041073	0.88243	2.15143	7.739	0.00540407	0.0212609	Nacad	11	-1	6597823	6606053	non-DE
ENSMUSG00000036972	0.879849	3.47715	14.5445	0.000136887	0.00136484	Zic4	9	1	91362413	91389348	non-DE
ENSMUSG00000045991	0.879463	3.74462	12.1248	0.000497548	0.00346257	Onecut2	18	1	64340364	64398488	non-DE
ENSMUSG00000113570	0.878539	0.0482178	5.23046	0.0221946	0.0623943	Gm5953	12	1	19288562	19291177	non-DE
ENSMUSG00000020848	0.877206	0.94401	5.99619	0.0143368	0.0447879	Doc2b	11	-1	75768966	75796049	non-DE
ENSMUSG00000042589	0.876996	3.20044	13.8111	0.000202137	0.00180313	Cux2	5	-1	121856366	122050102	non-DE
ENSMUSG00000032265	0.876893	2.74402	5.70061	0.016959	0.0508567	Tent5a	9	-1	85320439	85327348	non-DE
ENSMUSG00000023764	0.876458	4.53668	7.81387	0.00518468	0.020556	Sfi1	11	-1	3131850	3193463	non-DE
ENSMUSG00000036218	0.874628	1.36372	7.16733	0.00742432	0.0271156	Pdzrn4	15	1	92396881	92771819	non-DE
ENSMUSG00000018474	0.87404	7.1357	17.2468	3.28247e-05	0.000491477	Chd3	11	-1	69343273	69369406	non-DE
ENSMUSG00000103332	0.873939	1.45964	11.096	0.000865162	0.00527879	Pcdhga2	18	1	37668953	37841870	non-DE
ENSMUSG00000002266	0.873399	5.3162	12.2202	0.000472749	0.00333599	Zim1	7	-1	6671269	6696450	non-DE
ENSMUSG00000035954	0.872603	3.81377	16.9925	3.75283e-05	0.000544122	Dock4	12	1	40445952	40846874	non-DE
ENSMUSG00000066406	0.872429	5.29577	16.1118	5.97123e-05	0.000754827	Akap13	7	1	75455534	75754609	non-DE
ENSMUSG00000043456	0.870994	2.6761	8.76529	0.00307017	0.0138491	Zfp536	7	-1	37472135	37773641	non-DE
ENSMUSG00000030257	0.870714	5.87738	17.7107	2.57171e-05	0.000412548	Srgap3	6	-1	112717971	112947266	non-DE
ENSMUSG00000039109	0.870037	2.00282	3.72032	0.0537541	0.123019	F13a1	13	-1	36867178	37050244	non-DE
ENSMUSG00000020154	0.869823	2.92581	12.9174	0.000325535	0.00255227	Ptprb	10	1	116275523	116389535	non-DE
ENSMUSG00000020715	0.869698	3.66138	15.6433	7.64812e-05	0.000891604	Ern1	11	-1	106394650	106487852	non-DE
ENSMUSG00000020143	0.869185	0.108368	5.91358	0.0150246	0.0463656	Dock2	11	-1	34226815	34783892	non-DE
ENSMUSG00000052373	0.86887	2.57145	10.0044	0.00156167	0.00831204	Mpp3	11	-1	101999652	102028461	non-DE
ENSMUSG00000029245	0.868422	2.11188	6.26766	0.0122961	0.0398003	Epha5	5	-1	84054761	84417382	non-DE
ENSMUSG00000087543	0.868063	-0.00639172	6.49315	0.0108291	0.036235	Gm16576	15	1	79742698	79757394	non-DE
ENSMUSG00000027674	0.867313	0.818835	5.16109	0.0230984	0.0643427	Pex5l	3	-1	32949408	33143247	non-DE
ENSMUSG00000045215	0.867308	4.62848	20.9052	4.82574e-06	0.000127609	Asxl3	18	1	22344883	22530227	non-DE
ENSMUSG00000037112	0.866786	3.43386	21.5679	3.41515e-06	9.95589e-05	Sik2	9	-1	50892801	51009073	non-DE
ENSMUSG00000041757	0.863176	3.97615	10.9069	0.000958092	0.00569099	Plekha6	1	1	133164210	133303435	non-DE
ENSMUSG00000065947	0.862099	-0.0493274	3.04974	0.0807503	0.167117	mt-Nd4l	MT	1	9877	10173	non-DE
ENSMUSG00000034858	0.861932	2.82497	11.677	0.000632761	0.00417535	Fam214a	9	1	74952884	75032468	non-DE
ENSMUSG00000047013	0.861565	0.39196	6.24087	0.0124835	0.0402155	Fbxo41	6	-1	85469574	85502994	non-DE
ENSMUSG00000028773	0.860888	2.83074	2.5123	0.112961	0.21499	Fabp3	4	1	130308595	130315463	non-DE
ENSMUSG00000071796	0.860642	2.88535	11.6841	0.000630348	0.00416347	6820431F20Rik	8	-1	20262613	20297432	non-DE
ENSMUSG00000037270	0.859294	5.0826	13.2233	0.000276489	0.00226627	4932438A13Rik	3	1	36863104	37053033	non-DE
ENSMUSG00000097156	0.858665	0.611912	2.4129	0.120339	0.225394	Gm3764	3	1	88206813	88229959	non-DE
ENSMUSG00000022594	0.858367	0.525928	5.31024	0.0212005	0.0603017	Lynx1	15	-1	74747852	74753046	non-DE
ENSMUSG00000053046	0.85795	3.81969	16.9337	3.8708e-05	0.000555456	Brsk2	7	1	141949751	142004247	non-DE
ENSMUSG00000039716	0.857431	2.15044	8.57111	0.00341539	0.0149995	Dock3	9	-1	106892825	107231909	non-DE
ENSMUSG00000033618	0.856233	2.39807	5.95033	0.0147145	0.0455843	Map3k13	16	1	21794346	21933439	non-DE
ENSMUSG00000029510	0.855367	2.22766	4.23616	0.0395716	0.0972686	Gpc2	5	-1	138273655	138280005	non-DE
ENSMUSG00000019971	0.855206	4.2383	8.21543	0.00415357	0.0173214	Cep290	10	1	100487558	100574840	non-DE
ENSMUSG00000103472	0.855023	2.33041	15.2056	9.64147e-05	0.0010595	Pcdhga7	18	1	37714764	37841873	non-DE
ENSMUSG00000022629	0.854945	6.03289	18.7152	1.5177e-05	0.00028253	Kif21a	15	-1	90933276	91049948	non-DE
ENSMUSG00000031229	0.853581	7.51121	20.9781	4.6457e-06	0.000124387	Atrx	X	-1	105797615	105929403	non-DE
ENSMUSG00000067629	0.853512	4.37247	9.61406	0.00193093	0.00971005	Syngap1	17	1	26941253	26972434	non-DE
ENSMUSG00000084911	0.853324	0.538102	3.54992	0.0595483	0.133123	Gm16185	9	1	97085326	97088610	non-DE
ENSMUSG00000032740	0.853201	6.11194	16.5058	4.85015e-05	0.000650689	Ccdc88a	11	1	29373658	29510808	non-DE
ENSMUSG00000007682	0.851718	0.867192	6.03981	0.0139868	0.0439236	Dio2	12	-1	90724552	90738438	non-DE
ENSMUSG00000101609	0.849362	0.635616	5.03944	0.0247764	0.0677509	Kcnq1ot1	7	-1	143203458	143296549	non-DE
ENSMUSG00000053117	0.84927	1.07725	8.16097	0.00428015	0.0177258	E330013P04Rik	19	1	60144675	60162591	non-DE
ENSMUSG00000040855	0.848529	1.0145	4.12507	0.0422524	0.102528	Reps2	X	-1	162411954	162643649	non-DE
ENSMUSG00000005148	0.84834	0.759915	5.92947	0.0148897	0.0460444	Klf5	14	1	99298691	99315036	non-DE
ENSMUSG00000102976	0.847928	3.49206	13.3268	0.000261639	0.00217673	Zc3h11a	1	-1	133619862	133661380	non-DE
ENSMUSG00000028469	0.847156	3.58481	11.7784	0.000599208	0.00400909	Npr2	4	1	43631935	43651244	non-DE
ENSMUSG00000015599	0.846631	2.48531	5.1927	0.022682	0.0633875	Ttbk1	17	-1	46442448	46487675	non-DE
ENSMUSG00000045348	0.846255	3.08372	9.65319	0.00189023	0.00955134	Nyap1	5	-1	137729899	137741607	non-DE
ENSMUSG00000033831	0.843328	1.69647	3.5776	0.0585638	0.131393	Fgb	3	-1	83040141	83049863	non-DE
ENSMUSG00000030518	0.842981	0.781348	5.39323	0.020215	0.0581396	Fam189a1	7	-1	64756091	65156570	non-DE
ENSMUSG00000106464	0.84294	0.22648	5.31024	0.0212004	0.0603017	C130083M11Rik	5	-1	52199984	52216434	non-DE
ENSMUSG00000043219	0.842242	0.675727	8.35124	0.00385425	0.016365	Hoxa6	6	-1	52206288	52208722	non-DE
ENSMUSG00000061578	0.842216	0.561448	4.32213	0.0376199	0.0936372	Ksr2	5	1	117414000	117775003	non-DE
ENSMUSG00000025789	0.842127	4.46544	17.1751	3.40884e-05	0.00050465	St8sia2	7	-1	73939119	74013690	non-DE
ENSMUSG00000103845	0.842117	0.754996	9.45174	0.00210949	0.0103835	Gm19026	1	-1	6429655	6441296	non-DE
ENSMUSG00000074274	0.841936	3.30294	8.48779	0.00357539	0.0155065	D930028M14Rik	7	1	25152457	25156627	non-DE
ENSMUSG00000034683	0.841388	1.15029	5.12918	0.0235269	0.0653055	Ppp1r1c	2	1	79707780	79818496	non-DE
ENSMUSG00000042744	0.840985	4.89372	12.9231	0.00032456	0.00254596	Hectd4	5	1	121220219	121368577	non-DE
ENSMUSG00000041258	0.840082	5.24866	21.4656	3.60238e-06	0.000103289	Zfp236	18	-1	82593593	82692883	non-DE
ENSMUSG00000026113	0.839397	3.69557	9.56169	0.00198681	0.00990228	Inpp4a	1	1	37299865	37410736	non-DE
ENSMUSG00000048988	0.838681	0.491659	7.49855	0.00617487	0.0236608	Elfn1	5	1	139907943	139974722	non-DE
ENSMUSG00000051079	0.837398	0.00295832	4.96587	0.0258523	0.0700329	Rgs13	1	-1	144138654	144177372	non-DE
ENSMUSG00000028649	0.836521	7.71804	15.6777	7.5105e-05	0.000882336	Macf1	4	-1	123349633	123684360	non-DE
ENSMUSG00000030074	0.836373	2.67362	12.4888	0.000409404	0.00301972	Gxylt2	6	1	100704734	100810913	non-DE
ENSMUSG00000021071	0.836265	3.07931	12.023	0.000525489	0.00361609	Trim9	12	-1	70244533	70347614	non-DE
ENSMUSG00000040270	0.835808	4.7146	19.7877	8.65362e-06	0.000192736	Bach2	4	1	32238804	32586108	non-DE
ENSMUSG00000021767	0.834927	4.86566	14.8586	0.000115879	0.00121569	Kat6b	14	1	21481434	21672478	non-DE
ENSMUSG00000063450	0.833844	5.91428	10.7131	0.00106379	0.0061856	Syne2	12	1	75818134	76110926	non-DE
ENSMUSG00000104222	0.833431	2.57469	6.12615	0.0133197	0.0422453	Gm7292	6	1	117716342	117718868	non-DE
ENSMUSG00000029094	0.833359	4.8549	13.3466	0.000258896	0.00216679	Afap1	5	1	35893319	36003923	non-DE
ENSMUSG00000028842	0.833246	3.68122	13.9123	0.000191543	0.0017502	Ago3	4	-1	126331704	126429556	non-DE
ENSMUSG00000020866	0.8323	4.54914	13.203	0.000279496	0.00228502	Cacna1g	11	-1	94408391	94474198	non-DE
ENSMUSG00000022054	0.832185	6.82213	12.3507	0.000440823	0.00317967	Nefm	14	-1	68082590	68124846	non-DE
ENSMUSG00000006154	0.832091	0.743327	5.23964	0.0220779	0.0621128	Eps8l1	7	1	4460674	4480487	non-DE
ENSMUSG00000035566	0.83165	3.38192	12.4267	0.000423231	0.00308849	Pcdh17	14	1	84443563	84539002	non-DE
ENSMUSG00000074220	0.831163	1.63738	10.6855	0.00107977	0.0062542	Zfp382	7	1	30121942	30134950	non-DE
ENSMUSG00000014030	0.830358	2.81901	11.0501	0.000886822	0.0053868	Pax5	4	-1	44524757	44710487	non-DE
ENSMUSG00000020647	0.830287	3.44482	16.6501	4.49484e-05	0.000615106	Ncoa1	12	-1	4247362	4477182	non-DE
ENSMUSG00000098112	0.828307	1.89214	3.5726	0.0587402	0.13169	Bin2	15	-1	100641077	100669553	non-DE
ENSMUSG00000027376	0.826415	2.06022	10.3577	0.00128932	0.00717106	Prom2	2	-1	127526473	127541467	non-DE
ENSMUSG00000042002	0.82636	0.25188	4.32419	0.0375744	0.0935573	Foxn4	5	-1	114254164	114273807	non-DE
ENSMUSG00000036510	0.826031	1.64975	9.1888	0.002435	0.0115196	Cdh8	8	-1	99024471	99416471	non-DE
ENSMUSG00000042078	0.825983	1.74484	6.15777	0.0130836	0.0416908	Svop	5	-1	114026910	114091570	non-DE
ENSMUSG00000024112	0.824273	3.85321	10.5979	0.00113216	0.00648239	Cacna1h	17	-1	25374285	25433783	non-DE
ENSMUSG00000003233	0.823986	5.5234	21.864	2.92675e-06	9.04284e-05	Dvl3	16	1	20516982	20534010	non-DE
ENSMUSG00000024256	0.823029	0.439582	5.50186	0.0189963	0.0554116	Adcyap1	17	1	93199017	93206537	non-DE
ENSMUSG00000041852	0.822938	6.2647	23.335	1.36101e-06	5.33254e-05	Tcf20	15	-1	82808436	82987872	non-DE
ENSMUSG00000090100	0.82283	4.76313	24.1531	8.89713e-07	3.82653e-05	Ttbk2	2	-1	120732816	120850604	non-DE
ENSMUSG00000033854	0.822337	1.85933	6.8661	0.00878462	0.030842	Kcnk10	12	-1	98429437	98578310	non-DE
ENSMUSG00000062044	0.822167	2.832	6.96624	0.00830617	0.0295153	Lmtk3	7	1	45783738	45804144	non-DE
ENSMUSG00000029648	0.822005	5.12468	2.65675	0.103111	0.200149	Flt1	5	-1	147561604	147726011	non-DE
ENSMUSG00000056608	0.821942	5.42457	14.4374	0.000144894	0.0014196	Chd9	8	1	90828352	91054516	non-DE
ENSMUSG00000051343	0.821288	2.77998	5.74111	0.0165723	0.0499975	Rab11fip5	6	-1	85334962	85374634	non-DE
ENSMUSG00000063810	0.821235	4.96783	22.9315	1.67876e-06	6.09853e-05	Alms1	6	1	85587531	85702753	non-DE
ENSMUSG00000027799	0.820553	5.12486	27.4471	1.61449e-07	1.12916e-05	Nbea	3	-1	55625195	56183701	non-DE
ENSMUSG00000000560	0.82055	0.257842	6.01164	0.0142118	0.0444531	Gabra2	5	-1	70957597	71095849	non-DE
ENSMUSG00000057098	0.819256	4.32817	14.437	0.000144929	0.0014196	Ebf1	11	1	44617317	45008091	non-DE
ENSMUSG00000057133	0.818961	5.85571	16.1682	5.79594e-05	0.000742754	Chd6	2	-1	160946978	161109075	non-DE
ENSMUSG00000031732	0.818488	4.46201	21.0734	4.4202e-06	0.000120286	Phlpp2	8	1	109868542	109944671	non-DE
ENSMUSG00000039145	0.817518	0.884033	4.78522	0.028705	0.0761805	Camk1d	2	-1	5293457	5714515	non-DE
ENSMUSG00000051331	0.815726	3.05557	9.43926	0.00212389	0.0104394	Cacna1c	6	-1	118587240	119196418	non-DE
ENSMUSG00000041216	0.815623	1.18915	5.55001	0.0184805	0.0542775	Clvs1	4	1	9269293	9451691	non-DE
ENSMUSG00000033004	0.815566	5.86923	15.3393	8.98268e-05	0.00100107	Mycbp2	14	-1	103113411	103346814	non-DE
ENSMUSG00000043467	0.812434	4.11831	11.1182	0.00085486	0.00523086	Zbtb37	1	-1	161002922	161034849	non-DE
ENSMUSG00000015501	0.811545	2.82549	11.1812	0.000826308	0.00509001	Hivep2	10	1	13966075	14151374	non-DE
ENSMUSG00000068284	0.811274	5.23351	15.705	7.40266e-05	0.000873046	Usf3	16	1	44173246	44227465	non-DE
ENSMUSG00000079429	0.811121	2.6538	14.7531	0.000122544	0.00126317	Mroh2a	1	1	88226986	88262289	non-DE
ENSMUSG00000022055	0.81095	5.48061	9.37389	0.00220097	0.0106781	Nefl	14	1	68083863	68089095	non-DE
ENSMUSG00000047216	0.810595	0.894661	7.18313	0.00735922	0.0269634	Cdh19	1	-1	110888326	110977584	non-DE
ENSMUSG00000007827	0.810427	4.70041	21.3086	3.90968e-06	0.000109993	Ankrd26	6	-1	118501308	118562226	non-DE
ENSMUSG00000039585	0.810335	5.57114	15.6656	7.55875e-05	0.000885918	Myo9a	9	1	59750896	59928866	non-DE
ENSMUSG00000034206	0.807981	4.7327	16.9911	3.75545e-05	0.000544122	Polq	16	1	37011786	37095417	non-DE
ENSMUSG00000028364	0.806114	4.74477	46.822	7.7734e-12	1.16344e-08	Tnc	4	-1	63959785	64047015	non-DE
ENSMUSG00000030428	0.804887	3.40049	5.61877	0.0177692	0.052674	Ttyh1	7	1	4119408	4136708	non-DE
ENSMUSG00000038331	0.803772	2.81836	11.888	0.000564962	0.0038145	Satb2	1	-1	56793981	56978650	non-DE
ENSMUSG00000022263	0.802887	6.12322	16.9018	3.93644e-05	0.000560612	Trio	15	-1	27730651	28025848	non-DE
ENSMUSG00000036499	0.802859	5.21826	17.1789	3.40195e-05	0.000504128	Eea1	10	1	95940650	96045518	non-DE
ENSMUSG00000038916	0.801405	3.71443	14.6021	0.000132765	0.00134223	Soga3	10	1	29143839	29199630	non-DE
ENSMUSG00000037876	0.799914	5.78246	19.2453	1.14951e-05	0.000231062	Jmjd1c	10	1	67096125	67256326	non-DE
ENSMUSG00000110458	0.799512	0.926015	3.8028	0.051167	0.118476	Gm21769	8	1	20122384	20122494	non-DE
ENSMUSG00000031666	0.799464	3.01732	12.8026	0.000346147	0.00266638	Rbl2	8	1	91070057	91123844	non-DE
ENSMUSG00000026890	0.798607	2.06835	6.41925	0.011289	0.0373646	Lhx6	2	-1	36081953	36105408	non-DE
ENSMUSG00000025504	0.798074	2.62312	4.20256	0.0403629	0.0988727	Eps8l2	7	1	141338880	141363020	non-DE
ENSMUSG00000038143	0.797893	6.39044	19.0642	1.26392e-05	0.000245039	Stox2	8	-1	47180048	47446362	non-DE
ENSMUSG00000049336	0.797687	2.02297	10.548	0.00116311	0.00662414	Tenm2	11	-1	36006656	37235964	non-DE
ENSMUSG00000041439	0.795701	1.62037	6.57005	0.0103709	0.0350784	Mfsd6	1	-1	52656286	52727462	non-DE
ENSMUSG00000040009	0.795685	2.13545	10.395	0.00126355	0.00706712	Gnaz	10	1	74967177	75016907	non-DE
ENSMUSG00000032253	0.795672	7.05139	21.1036	4.35102e-06	0.000119173	Phip	9	-1	82866159	82975516	non-DE
ENSMUSG00000002111	0.795481	0.888039	4.32544	0.0375467	0.09352	Spi1	2	1	91082390	91115756	non-DE
ENSMUSG00000053411	0.79541	2.09745	2.37575	0.123232	0.229177	Cbx7	15	-1	79915807	79971119	non-DE
ENSMUSG00000036766	0.795342	1.77465	6.58659	0.010275	0.0348326	Dner	1	-1	84369839	84696221	non-DE
ENSMUSG00000025006	0.795164	3.75147	15.7238	7.32968e-05	0.00086722	Sorbs1	19	-1	40294753	40513779	non-DE
ENSMUSG00000050069	0.793935	2.58815	8.51879	0.00351498	0.0153289	Grem2	1	-1	174833785	174921819	non-DE
ENSMUSG00000021453	0.793424	4.24458	11.1191	0.000854412	0.00523026	Gadd45g	13	1	51846678	51848468	non-DE
ENSMUSG00000022829	0.793161	0.0198825	4.93308	0.0263474	0.0711679	Stxbp5l	16	-1	37114942	37384962	non-DE
ENSMUSG00000044966	0.792293	0.534955	3.77522	0.052017	0.120089	Fbxo48	11	1	16951375	16954772	non-DE
ENSMUSG00000018076	0.792067	5.49866	14.9601	0.000109806	0.0011711	Med13l	5	1	118560679	118765438	non-DE
ENSMUSG00000017950	0.791109	0.969471	3.91301	0.0479136	0.11272	Hnf4a	2	1	163506808	163572910	non-DE
ENSMUSG00000033039	0.790185	4.2711	22.9055	1.70164e-06	6.15181e-05	Micall1	15	1	79108898	79136900	non-DE
ENSMUSG00000091472	0.789918	-0.0507804	4.07634	0.0434878	0.10468	Gm3739	14	-1	7293648	7315049	non-DE
ENSMUSG00000054423	0.788887	3.24298	8.35433	0.00384769	0.0163468	Cadps	14	-1	12372563	12823079	non-DE
ENSMUSG00000022488	0.788455	1.43354	3.07189	0.0796567	0.165311	Nckap1l	15	1	103453794	103498810	non-DE
ENSMUSG00000036306	0.786781	2.87183	5.94396	0.0147678	0.0457144	Lzts1	8	-1	69132669	69184225	non-DE
ENSMUSG00000018008	0.78629	1.51187	5.27127	0.0216802	0.0613051	Cyth4	15	1	78597047	78622019	non-DE
ENSMUSG00000034297	0.785275	6.53166	23.2148	1.44881e-06	5.48972e-05	Med13	11	-1	86267033	86357602	non-DE
ENSMUSG00000000223	0.784924	1.68307	8.50171	0.00354812	0.015424	Drp2	X	1	134404551	134456573	non-DE
ENSMUSG00000031442	0.784158	3.82038	13.4426	0.000245976	0.00208467	Mcf2l	8	1	12873806	13020905	non-DE
ENSMUSG00000042826	0.783996	0.537573	3.66991	0.0554031	0.126002	Fgf11	11	-1	69796068	69801857	non-DE
ENSMUSG00000056296	0.7837	1.32974	7.64612	0.00568947	0.0221008	Synpr	14	1	13284780	13616340	non-DE
ENSMUSG00000033902	0.783539	3.91291	14.7786	0.000120902	0.00125228	Mapkbp1	2	1	119972699	120027408	non-DE
ENSMUSG00000030655	0.783317	6.71596	14.9141	0.000112521	0.00119187	Smg1	7	-1	118131308	118243670	non-DE
ENSMUSG00000030059	0.783102	5.28918	17.4662	2.92467e-05	0.000454082	Tmf1	6	-1	97152997	97179122	non-DE
ENSMUSG00000027419	0.782863	0.771219	6.01831	0.0141582	0.0443411	Pcsk2	2	1	143546156	143816285	non-DE
ENSMUSG00000015312	0.782834	1.76718	6.3166	0.0119613	0.0390628	Gadd45b	10	1	80930073	80932204	non-DE
ENSMUSG00000022129	0.782488	0.853611	4.96319	0.0258924	0.0701016	Dct	14	-1	118012790	118052244	non-DE
ENSMUSG00000032243	0.782419	1.19967	7.21289	0.0072382	0.0266899	Itga11	9	1	62677826	62783982	non-DE
ENSMUSG00000039782	0.782151	3.03051	9.50688	0.00204703	0.0101282	Cpeb2	5	1	43233170	43289724	non-DE
ENSMUSG00000026676	0.781239	0.240347	5.4562	0.019499	0.0565616	Ccdc3	2	1	5137776	5230878	non-DE
ENSMUSG00000049191	0.780098	3.3922	10.949	0.000936543	0.00559794	Rtl5	X	-1	102066544	102071304	non-DE
ENSMUSG00000027329	0.779901	2.63595	11.9318	0.000551829	0.0037372	Spef1	2	-1	131170261	131187282	non-DE
ENSMUSG00000000823	0.779747	5.0967	12.3288	0.000446019	0.003203	Zfp512b	2	-1	181582103	181592803	non-DE
ENSMUSG00000032318	0.779356	2.34695	9.98883	0.00157492	0.00834642	Isl2	9	1	55538672	55546180	non-DE
ENSMUSG00000067438	0.778671	1.92401	7.42673	0.0064262	0.0244052	Hmx1	5	1	35389108	35399730	non-DE
ENSMUSG00000074782	0.778448	0.258627	4.23996	0.0394832	0.097099	4833422C13Rik	13	-1	91701665	91741872	non-DE
ENSMUSG00000021277	0.777862	5.23992	19.4867	1.01303e-05	0.000214153	Traf3	12	1	111166370	111267153	non-DE
ENSMUSG00000043531	0.777837	1.6378	7.08501	0.00777313	0.028088	Sorcs1	19	-1	50143299	50678646	non-DE
ENSMUSG00000048612	0.777765	3.55775	6.0619	0.0138129	0.0434779	Myof	19	-1	37899036	38043577	non-DE
ENSMUSG00000037355	0.777561	2.84713	9.91021	0.00164364	0.00858855	Uvssa	5	1	33378549	33419754	non-DE
ENSMUSG00000039738	0.777147	4.73396	18.3399	1.84797e-05	0.000326548	Slx4	16	-1	3979105	4003770	non-DE
ENSMUSG00000039741	0.777133	6.30851	15.8319	6.92248e-05	0.000838003	Bahcc1	11	1	120232947	120292296	non-DE
ENSMUSG00000041695	0.777011	2.47802	6.78514	0.00919198	0.0318981	Kcnj2	11	1	111066164	111076821	non-DE
ENSMUSG00000028524	0.776808	1.39468	6.17594	0.0129499	0.0413178	Sgip1	4	1	102741297	102973628	non-DE
ENSMUSG00000034731	0.776787	1.15603	7.00732	0.0081177	0.0290525	Dgkh	14	-1	78558750	78732776	non-DE
ENSMUSG00000046449	0.776629	1.22168	5.92428	0.0149337	0.0461421	Nexmif	X	-1	104077434	104201185	non-DE
ENSMUSG00000102748	0.775801	1.37299	5.76753	0.016325	0.0493907	Pcdhgb2	18	1	37689828	37841873	non-DE
ENSMUSG00000040729	0.774302	2.8979	11.2401	0.000800484	0.00498289	Cep126	9	-1	8076461	8134294	non-DE
ENSMUSG00000031004	0.773482	8.16494	23.1956	1.46332e-06	5.51674e-05	Mki67	7	-1	135689784	135716361	non-DE
ENSMUSG00000070802	0.772225	2.43444	7.73317	0.00542154	0.0213033	Pnmal2	7	1	16944682	16948828	non-DE
ENSMUSG00000060012	0.770044	4.36921	23.1174	1.52403e-06	5.68832e-05	Kif13b	14	1	64647265	64809617	non-DE
ENSMUSG00000040407	0.767193	5.82278	10.0152	0.00155255	0.00827121	Akap9	5	1	3928054	4081310	non-DE
ENSMUSG00000036501	0.766792	4.83441	26.1819	3.10726e-07	1.79561e-05	Fam13b	18	-1	34442352	34506823	non-DE
ENSMUSG00000058975	0.766608	0.243791	4.00888	0.0452612	0.10787	Kcnc1	7	1	46396497	46438704	non-DE
ENSMUSG00000013236	0.76634	7.325	18.3359	1.85185e-05	0.000326848	Ptprs	17	-1	56412426	56476483	non-DE
ENSMUSG00000026715	0.765584	0.134475	4.08602	0.0432394	0.104314	Serpinc1	1	1	160978585	161005863	non-DE
ENSMUSG00000000632	0.765396	0.763598	4.28215	0.0385146	0.0953122	Sez6	11	1	77930800	77979048	non-DE
ENSMUSG00000033671	0.765195	5.61951	16.3706	5.2086e-05	0.000686242	Cep350	1	-1	155844964	155973255	non-DE
ENSMUSG00000026826	0.764199	2.49197	14.5677	0.000135213	0.00135457	Nr4a2	2	-1	57106830	57124003	non-DE
ENSMUSG00000051251	0.763772	3.88926	11.7165	0.000619493	0.00410627	Nhlh1	1	-1	172052292	172057573	non-DE
ENSMUSG00000040003	0.763499	1.49698	4.43563	0.0351961	0.0889832	Magi2	5	1	19227036	20704792	non-DE
ENSMUSG00000026468	0.763247	2.40275	9.5202	0.00203223	0.0100716	Lhx4	1	-1	155698031	155751684	non-DE
ENSMUSG00000036790	0.763042	2.3944	12.4675	0.000414095	0.00304408	Slitrk2	X	1	66649318	66661393	non-DE
ENSMUSG00000040296	0.760521	1.7452	5.20742	0.0224907	0.0630135	Ddx58	4	-1	40203773	40239828	non-DE
ENSMUSG00000029055	0.76	0.998203	6.02904	0.0140724	0.0441179	Plch2	4	-1	154983115	155056784	non-DE
ENSMUSG00000027254	0.759685	4.58776	16.8632	4.0174e-05	0.000569937	Map1a	2	1	121289600	121310832	non-DE
ENSMUSG00000060206	0.759203	7.1732	28.3236	1.02638e-07	8.17117e-06	Zfp462	4	1	54945048	55083563	non-DE
ENSMUSG00000044791	0.75912	6.90197	27.8627	1.30239e-07	9.55531e-06	Setd2	9	1	110532597	110618633	non-DE
ENSMUSG00000030830	0.758886	0.561067	4.11325	0.0425486	0.102964	Itgal	7	1	127296260	127335138	non-DE
ENSMUSG00000028439	0.758173	2.90384	7.83955	0.00511153	0.0203361	Fam219a	4	-1	41517691	41569538	non-DE
ENSMUSG00000029563	0.757472	4.87797	14.1508	0.000168727	0.00159762	Foxp2	6	1	14901349	15441977	non-DE
ENSMUSG00000023484	0.75721	0.910423	3.02667	0.0819059	0.168831	Prph	15	1	99055174	99058978	non-DE
ENSMUSG00000020758	0.756207	0.991725	5.5085	0.0189242	0.0552553	Itgb4	11	1	115974709	116008412	non-DE
ENSMUSG00000068263	0.756111	1.17371	3.24226	0.0717614	0.152955	Efcc1	6	1	87730869	87755908	non-DE
ENSMUSG00000047888	0.755693	5.81993	16.296	5.41775e-05	0.000704496	Tnrc6b	15	1	80711313	80941085	non-DE
ENSMUSG00000031822	0.755682	4.87335	19.756	8.79868e-06	0.000194233	Gse1	8	1	120228456	120581390	non-DE
ENSMUSG00000041144	0.755523	0.945215	3.77707	0.0519595	0.120012	Dnah7b	1	1	46066315	46373546	non-DE
ENSMUSG00000020220	0.753321	4.49914	12.3256	0.00044678	0.00320563	Vps13d	4	-1	144972622	145195005	non-DE
ENSMUSG00000028399	0.752397	5.50076	15.1178	0.000101008	0.0010947	Ptprd	4	-1	75941238	78211961	non-DE
ENSMUSG00000038025	0.750656	5.84312	23.6443	1.15887e-06	4.739e-05	Phf2	13	-1	48801750	48871119	non-DE
ENSMUSG00000028051	0.750623	1.18731	4.70463	0.0300815	0.0790344	Hcn3	3	-1	89146074	89160196	non-DE
ENSMUSG00000035158	0.749835	2.70057	8.28082	0.00400659	0.0168467	Mitf	6	1	97807052	98021349	non-DE
ENSMUSG00000024347	0.748748	2.03931	5.66585	0.0172983	0.0516773	Psd2	18	1	35964830	36014715	non-DE
ENSMUSG00000037486	0.748491	4.80701	13.8492	0.000198079	0.00178271	Asxl2	12	1	3426857	3506852	non-DE
ENSMUSG00000039219	0.748106	6.12897	19.9992	7.74745e-06	0.000177303	Arid4b	13	1	14063232	14199603	non-DE
ENSMUSG00000031027	0.747736	0.647297	4.67518	0.0306015	0.0800161	Stk33	7	-1	109279223	109439081	non-DE
ENSMUSG00000032589	0.747723	2.37274	6.52479	0.0106381	0.0357395	Bsn	9	-1	108096022	108190384	non-DE
ENSMUSG00000087034	0.7477	0.827866	6.75741	0.00933589	0.0323151	Cbfa2t2-ps1	5	1	60231483	60232212	non-DE
ENSMUSG00000022141	0.74613	6.92517	16.3504	5.26458e-05	0.000691791	Nipbl	15	-1	8290617	8444463	non-DE
ENSMUSG00000033863	0.746092	1.47057	3.07638	0.079437	0.165061	Klf9	19	1	23141226	23166911	non-DE
ENSMUSG00000035569	0.745899	7.41612	21.8413	2.96161e-06	9.10194e-05	Ankrd11	8	-1	122883822	123042277	non-DE
ENSMUSG00000079669	0.745783	0.663297	4.35834	0.0368281	0.0921092	Gm17396	9	1	117252536	117254696	non-DE
ENSMUSG00000059146	0.745469	2.37522	7.6545	0.00566308	0.0220268	Ntrk3	7	-1	78175959	78738012	non-DE
ENSMUSG00000024887	0.745453	2.02557	5.72624	0.0167133	0.0503416	Asah2	19	-1	31984654	32061469	non-DE
ENSMUSG00000025092	0.74483	4.36143	19.0151	1.29685e-05	0.000249331	Hspa12a	19	-1	58795751	58860984	non-DE
ENSMUSG00000037887	0.744575	2.61812	8.2142	0.00415639	0.0173283	Dusp8	7	-1	142079490	142095843	non-DE
ENSMUSG00000032826	0.744246	4.94725	18.2433	1.94413e-05	0.000335614	Ank2	3	-1	126921612	127499350	non-DE
ENSMUSG00000038170	0.743696	5.62876	24.9625	5.84568e-07	2.82233e-05	Pde4dip	3	-1	97689824	97888707	non-DE
ENSMUSG00000028222	0.743527	1.00612	6.46869	0.0109791	0.0365277	Calb1	4	1	15881264	15908064	non-DE
ENSMUSG00000085982	0.743023	0.078487	2.86635	0.09045	0.182227	9530051G07Rik	X	1	153037629	153072915	non-DE
ENSMUSG00000038002	0.74288	5.10979	29.2807	6.26174e-08	5.53537e-06	Cramp1l	17	-1	24961226	25015788	non-DE
ENSMUSG00000029765	0.742195	4.07125	15.3536	8.91509e-05	0.00099502	Plxna4	6	-1	32144268	32588192	non-DE
ENSMUSG00000039542	0.741857	5.3708	19.3629	1.08085e-05	0.000222519	Ncam1	9	-1	49502136	49798925	non-DE
ENSMUSG00000112823	0.741814	0.303215	3.46196	0.0627959	0.138256	Gm6125	12	-1	44619191	44622662	non-DE
ENSMUSG00000026463	0.741388	4.78592	13.7432	0.000209583	0.00185204	Atp2b4	1	-1	133699457	133801041	non-DE
ENSMUSG00000005871	0.741169	6.73962	20.3474	6.45822e-06	0.000156055	Apc	18	1	34220924	34322189	non-DE
ENSMUSG00000040852	0.74083	3.61812	16.0052	6.31697e-05	0.00078592	Plekhh2	17	1	84511895	84622138	non-DE
ENSMUSG00000073647	0.739933	3.28858	8.14805	0.00431074	0.0178327	Gm10557	18	-1	4198320	4198938	non-DE
ENSMUSG00000057335	0.739829	6.61625	18.6554	1.56605e-05	0.00028973	Cep170	1	-1	176733653	176814067	non-DE
ENSMUSG00000033253	0.739534	4.37155	13.5258	0.000235306	0.00202037	Szt2	4	-1	118362743	118409273	non-DE
ENSMUSG00000019982	0.739201	2.6604	10.7376	0.00104981	0.00612012	Myb	10	-1	21124935	21160984	non-DE
ENSMUSG00000026896	0.739014	0.566954	2.69876	0.100426	0.196429	Ifih1	2	-1	62595798	62646255	non-DE
ENSMUSG00000102440	0.737875	0.943558	4.97356	0.0257377	0.0697729	Pcdhga9	18	1	37736936	37841870	non-DE
ENSMUSG00000026490	0.737063	5.67046	17.8748	2.35924e-05	0.000387605	Cdc42bpa	1	1	179960472	180165603	non-DE
ENSMUSG00000022788	0.736639	4.40744	18.3004	1.88664e-05	0.000329876	Fgd4	16	-1	16416917	16600549	non-DE
ENSMUSG00000048070	0.736126	0.491086	4.51341	0.0336301	0.0861295	Pirt	11	1	66911981	66929876	non-DE
ENSMUSG00000043243	0.736009	0.772915	4.32757	0.0374996	0.0934183	Fam129c	8	1	71597648	71607936	non-DE
ENSMUSG00000095115	0.735791	4.05442	10.1837	0.00141687	0.00773237	Itpripl2	7	-1	118485111	118491975	non-DE
ENSMUSG00000096904	0.735635	1.02546	7.276	0.0069882	0.0259277	Gm3591	14	-1	6405827	6412482	non-DE
ENSMUSG00000073643	0.735585	5.37768	21.4307	3.66843e-06	0.000104383	Wdfy1	1	-1	79702262	79776143	non-DE
ENSMUSG00000052727	0.735503	7.73989	13.9765	0.000185108	0.00170388	Map1b	13	-1	99421446	99516540	non-DE
ENSMUSG00000024593	0.735465	4.1725	11.2339	0.000803155	0.00499411	Megf10	18	1	57133090	57297467	non-DE
ENSMUSG00000069806	0.735036	4.83881	15.0664	0.000103793	0.00112244	Cacng7	7	1	3332955	3368221	non-DE
ENSMUSG00000027200	0.734843	4.42464	21.4748	3.58515e-06	0.000102992	Sema6d	2	1	124089969	124667770	non-DE
ENSMUSG00000096975	0.734535	0.29976	4.75429	0.0292254	0.0772957	Gm16386	17	-1	22784798	22817741	non-DE
ENSMUSG00000073664	0.733718	4.59052	9.03986	0.00264156	0.0122593	Nbeal1	1	1	60180599	60338328	non-DE
ENSMUSG00000037652	0.733125	4.05678	8.29058	0.00398512	0.0167967	Phc3	3	-1	30899371	30969415	non-DE
ENSMUSG00000074818	0.7329	0.311306	3.70347	0.0542996	0.123891	Pdzd7	19	-1	45026906	45046614	non-DE
ENSMUSG00000055024	0.732893	6.35253	28.2807	1.04936e-07	8.3099e-06	Ep300	15	1	81585351	81652077	non-DE
ENSMUSG00000048960	0.731895	5.42074	10.9832	0.000919408	0.00553415	Prex2	1	1	10993465	11303681	non-DE
ENSMUSG00000034163	0.731444	5.17338	9.73763	0.00180533	0.0092157	Zfc3h1	10	1	115384959	115432772	non-DE
ENSMUSG00000043940	0.731437	6.30347	13.6242	0.000223289	0.00193937	Wdfy3	5	-1	101832956	102069921	non-DE
ENSMUSG00000021068	0.731299	5.83027	19.9147	8.09748e-06	0.000183908	Nin	12	-1	70011435	70113717	non-DE
ENSMUSG00000037940	0.730636	2.49873	11.0651	0.000879684	0.00535213	Inpp4b	8	1	81342556	82127914	non-DE
ENSMUSG00000054509	0.730483	3.13048	7.56724	0.00594386	0.0229165	Parp4	14	1	56575619	56659794	non-DE
ENSMUSG00000068270	0.729566	4.84874	15.144	9.96143e-05	0.00108352	Shroom4	X	1	6399854	6637448	non-DE
ENSMUSG00000026100	0.729488	2.6495	9.64737	0.00189623	0.00957197	Mstn	1	1	53061640	53068079	non-DE
ENSMUSG00000011171	0.728552	1.29438	7.01255	0.00809402	0.0289886	Vipr2	12	1	116077726	116146261	non-DE
ENSMUSG00000028456	0.728106	4.79759	15.1484	9.93817e-05	0.00108178	Unc13b	4	1	43058953	43264871	non-DE
ENSMUSG00000036908	0.727981	1.12676	1.95826	0.1617	0.28053	Unc93b1	19	1	3935186	3949340	non-DE
ENSMUSG00000017291	0.727067	6.50219	21.7717	3.07102e-06	9.34226e-05	Taok1	11	-1	77529162	77607815	non-DE
ENSMUSG00000026532	0.7268	4.59516	7.86679	0.00503508	0.0201336	Spta1	1	1	174172776	174248450	non-DE
ENSMUSG00000029919	0.726595	0.75948	2.75756	0.0967955	0.191	Hpgds	6	-1	65117293	65144908	non-DE
ENSMUSG00000036334	0.72611	3.64982	11.4502	0.00071486	0.00456455	Igsf10	3	-1	59316735	59344394	non-DE
ENSMUSG00000026674	0.726104	5.89106	18.212	1.97626e-05	0.000339595	Ddr2	1	-1	169972307	170110762	non-DE
ENSMUSG00000038024	0.725429	4.72373	20.3948	6.3001e-06	0.000154327	Dennd4c	4	1	86748555	86850603	non-DE
ENSMUSG00000040624	0.725085	4.35496	21.5657	3.41907e-06	9.95589e-05	Plekhg1	10	1	3740364	3967303	non-DE
ENSMUSG00000026657	0.724597	6.34059	22.8193	1.77969e-06	6.40302e-05	Frmd4a	2	1	4017717	4614043	non-DE
ENSMUSG00000046876	0.72403	1.29084	4.91316	0.0266528	0.0717469	Atxn1	13	-1	45549755	45965008	non-DE
ENSMUSG00000029638	0.723975	0.0564395	2.55729	0.109787	0.210045	Glcci1	6	1	8509600	8597548	non-DE
ENSMUSG00000025912	0.723736	3.27759	9.07775	0.00258739	0.0120791	Mybl1	1	-1	9667415	9700209	non-DE
ENSMUSG00000046807	0.723148	1.68664	5.83782	0.0156853	0.0478967	Lrrc75b	10	-1	75550123	75560330	non-DE
ENSMUSG00000033007	0.723017	2.05632	6.25654	0.0123736	0.0399903	Asic4	1	1	75450436	75474343	non-DE
ENSMUSG00000015053	0.722439	3.38952	5.0655	0.0244066	0.0670264	Gata2	6	1	88193891	88207032	non-DE
ENSMUSG00000072501	0.721767	5.47972	19.6014	9.5397e-06	0.000205145	Phf20l1	15	1	66577560	66647976	non-DE
ENSMUSG00000036591	0.721596	6.20111	23.1201	1.5219e-06	5.68832e-05	Arhgap21	2	-1	20847919	20968881	non-DE
ENSMUSG00000027525	0.721544	2.65196	11.2118	0.000812806	0.00502697	Phactr3	2	1	178118975	178338492	non-DE
ENSMUSG00000017446	0.721156	1.58177	3.16931	0.0750341	0.15838	C1qtnf1	11	1	118428203	118449963	non-DE
ENSMUSG00000052331	0.720182	4.3403	13.3099	0.000264012	0.0021904	Ankrd44	1	-1	54645340	54926387	non-DE
ENSMUSG00000091243	0.719745	2.41139	10.5806	0.00114282	0.00653848	Vgll3	16	1	65815257	65866368	non-DE
ENSMUSG00000038400	0.719669	2.79152	5.95819	0.0146491	0.0454222	Pmepa1	2	-1	173224458	173276533	non-DE
ENSMUSG00000034377	0.719191	5.81561	20.6232	5.59149e-06	0.000142501	Tulp4	17	1	6106437	6251128	non-DE
ENSMUSG00000048126	0.718818	3.83242	5.15938	0.0231211	0.0643821	Col6a3	1	-1	90765923	90843971	non-DE
ENSMUSG00000049538	0.718056	0.210865	4.69283	0.0302887	0.0794482	Adamts16	13	-1	70727802	70841811	non-DE
ENSMUSG00000023885	0.717312	1.79841	7.14293	0.00752601	0.0273934	Thbs2	17	-1	14665500	14694235	non-DE
ENSMUSG00000025128	0.717297	2.44574	8.66374	0.00324604	0.0144422	Bhlhe22	3	1	18054174	18057517	non-DE
ENSMUSG00000026447	0.717265	4.52011	10.6218	0.0011176	0.00642607	Pik3c2b	1	1	133045667	133108687	non-DE
ENSMUSG00000005893	0.717252	5.14566	13.3589	0.000257198	0.00215657	Nr2c2	6	1	92091390	92174294	non-DE
ENSMUSG00000037605	0.717214	3.44795	9.31292	0.00227543	0.0109541	Adgrl3	5	1	81020138	81825133	non-DE
ENSMUSG00000037813	0.716901	1.66875	6.24684	0.0124415	0.0401231	D630003M21Rik	2	-1	158182533	158229222	non-DE
ENSMUSG00000024036	0.716726	1.72277	5.71401	0.0168301	0.0505333	Slc37a1	17	1	31295483	31350696	non-DE
ENSMUSG00000019906	0.7166	0.755843	3.76974	0.0521879	0.120428	Lin7a	10	1	107271686	107421474	non-DE
ENSMUSG00000024769	0.715698	3.57017	8.96543	0.00275136	0.0126859	Cdc42bpg	19	1	6306456	6325652	non-DE
ENSMUSG00000097002	0.715188	0.253379	4.72504	0.0297265	0.0783745	Gm2670	14	-1	28508074	28511392	non-DE
ENSMUSG00000018427	0.715185	2.8352	6.02332	0.0141181	0.0442431	Ypel2	11	-1	86936425	86993707	non-DE
ENSMUSG00000028487	0.714968	3.04926	11.6165	0.000653704	0.00427622	Bnc2	4	-1	84275095	84675275	non-DE
ENSMUSG00000024109	0.714664	1.40941	5.46084	0.0194473	0.056474	Nrxn1	17	-1	90033631	91093071	non-DE
ENSMUSG00000031558	0.71464	5.87762	17.0475	3.64561e-05	0.000532894	Slit2	5	1	47983138	48307733	non-DE
ENSMUSG00000057378	0.714378	-0.0864681	3.81303	0.0508554	0.117972	Ryr3	2	-1	112631355	113217096	non-DE
ENSMUSG00000050954	0.713839	1.62698	7.29931	0.00689811	0.0256954	Zfp169	13	-1	48487647	48513451	non-DE
ENSMUSG00000051537	0.713182	0.354281	2.58613	0.107803	0.20715	Gm5124	X	1	21360865	21364622	non-DE
ENSMUSG00000113128	0.712695	0.20768	4.63312	0.0313605	0.0816147	Gm47813	13	-1	3899209	3900248	non-DE
ENSMUSG00000022973	0.712682	4.06877	18.6108	1.6031e-05	0.000295124	Synj1	16	-1	90936092	91011308	non-DE
ENSMUSG00000033544	0.712585	1.5345	8.22422	0.0041335	0.0172569	Angptl1	1	1	156838562	156861078	non-DE
ENSMUSG00000074925	0.71185	2.65444	6.88859	0.00867475	0.0305506	Ptar1	19	1	23687400	23721129	non-DE
ENSMUSG00000003119	0.711776	5.93766	24.478	7.5163e-07	3.31848e-05	Cdk12	11	1	98203059	98278504	non-DE
ENSMUSG00000029679	0.710898	-0.356533	0.491774	0.483137	0.615362	Hyal6	6	1	24733245	24745452	non-DE
ENSMUSG00000100005	0.7108	0.0992155	2.38103	0.122817	0.22866	B130024G19Rik	7	1	70364910	70489972	non-DE
ENSMUSG00000052512	0.71042	4.70881	27.0217	2.01187e-07	1.32068e-05	Nav2	7	1	48908716	49610090	non-DE
ENSMUSG00000078247	0.709098	1.63909	7.15142	0.00749046	0.0272906	Airn	17	1	12741311	12860136	non-DE
ENSMUSG00000063594	0.708147	0.736984	5.20706	0.0224953	0.0630147	Gng8	7	1	16891786	16895436	non-DE
ENSMUSG00000034799	0.707964	1.87889	4.53671	0.0331752	0.0852268	Unc13a	8	-1	71624417	71671757	non-DE
ENSMUSG00000033209	0.707739	5.39685	20.2556	6.7755e-06	0.000159448	Ttc28	5	1	110879803	111289780	non-DE
ENSMUSG00000032549	0.707267	3.50084	6.51691	0.0106853	0.0358662	Rab6b	9	1	103111787	103185276	non-DE
ENSMUSG00000026527	0.707063	0.424567	4.22206	0.0399018	0.0979194	Rgs7	1	-1	175059087	175492500	non-DE
ENSMUSG00000032816	0.706549	4.54461	13.8207	0.000201111	0.00180026	Igdcc4	9	1	65101486	65137940	non-DE
ENSMUSG00000078671	0.706511	5.80341	12.0195	0.000526474	0.00362101	Chd2	7	-1	73426638	73541830	non-DE
ENSMUSG00000035236	0.705836	4.78144	11.1689	0.000831781	0.00511871	Scai	2	-1	39066214	39190734	non-DE
ENSMUSG00000024558	0.705532	2.57946	9.75234	0.00179095	0.00916562	Mapk4	18	-1	73928486	74065359	non-DE
ENSMUSG00000054051	0.704563	4.63222	20.095	7.36872e-06	0.000170989	Ercc6	14	1	32513521	32580990	non-DE
ENSMUSG00000035093	0.704551	5.739	23.5535	1.21488e-06	4.91437e-05	Secisbp2l	2	-1	125736986	125782870	non-DE
ENSMUSG00000106928	0.702828	0.972156	5.47058	0.0193392	0.0562257	Gm43860	5	-1	35551260	35553964	non-DE
ENSMUSG00000030523	0.702713	2.32161	9.24733	0.00235839	0.0112414	Trpm1	7	1	64153835	64269775	non-DE
ENSMUSG00000041268	0.702249	4.19756	9.02496	0.00266317	0.012351	Dmxl2	9	-1	54365158	54501626	non-DE
ENSMUSG00000028246	0.702167	5.23809	12.547	0.000396838	0.00295666	Faxc	4	1	21931329	21996839	non-DE
ENSMUSG00000059493	0.702078	4.4114	13.6257	0.000223116	0.00193937	Nhs	X	-1	161833296	162159730	non-DE
ENSMUSG00000038048	0.701288	0.916815	6.06873	0.0137596	0.0433529	Cntnap5c	17	1	57769570	58410355	non-DE
ENSMUSG00000025321	0.701201	5.46178	13.284	0.000267674	0.00221219	Itgb8	12	-1	119158022	119238802	non-DE
ENSMUSG00000028613	0.70056	4.68538	14.1914	0.000165119	0.0015711	Lrp8	4	1	107802261	107876840	non-DE
ENSMUSG00000034218	0.700271	5.61006	13.9725	0.000185502	0.00170646	Atm	9	-1	53439149	53536740	non-DE
ENSMUSG00000056919	0.699972	4.40409	13.6633	0.000218688	0.00190985	Cep162	9	-1	87189577	87255536	non-DE
ENSMUSG00000043079	0.699781	5.2014	13.2391	0.000274173	0.00225099	Synpo	18	-1	60593973	60660142	non-DE
ENSMUSG00000038058	0.699678	1.06274	5.25754	0.0218519	0.0615926	Nod1	6	-1	54923949	54972612	non-DE
ENSMUSG00000026610	0.699468	2.69259	12.78	0.000350353	0.00269324	Esrrg	1	1	187608791	188214885	non-DE
ENSMUSG00000034832	0.698981	6.47757	18.2187	1.96932e-05	0.000338791	Tet3	6	-1	83362373	83459084	non-DE
ENSMUSG00000018501	0.69885	7.32187	24.5962	7.06915e-07	3.19311e-05	Ncor1	11	-1	62316426	62458541	non-DE
ENSMUSG00000062209	0.698774	2.41362	5.70158	0.0169496	0.050844	Erbb4	1	-1	68032186	69108059	non-DE
ENSMUSG00000031709	0.698597	4.56778	16.0618	6.13072e-05	0.000768076	Tbc1d9	8	1	83165352	83272934	non-DE
ENSMUSG00000039704	0.698556	3.93454	6.63685	0.00998907	0.0340561	Lmbrd2	15	1	9140550	9202483	non-DE
ENSMUSG00000073557	0.698369	3.70401	6.80363	0.00909726	0.031628	Ppp1r12b	1	-1	134754658	134955942	non-DE
ENSMUSG00000025216	0.697293	1.82057	4.82526	0.0280457	0.0747436	Lbx1	19	-1	45232684	45235812	non-DE
ENSMUSG00000063317	0.696982	5.20215	17.7705	2.49211e-05	0.000401501	Usp31	7	-1	121642021	121707253	non-DE
ENSMUSG00000009378	0.696865	2.01597	9.71758	0.00182513	0.00928484	Slc16a12	19	-1	34668403	34747289	non-DE
ENSMUSG00000063063	0.695906	3.81439	10.9762	0.000922913	0.00554303	Ctnna2	6	-1	76881637	77979699	non-DE
ENSMUSG00000029238	0.695709	4.63199	14.1273	0.000170849	0.00161191	Clock	5	-1	76209868	76304792	non-DE
ENSMUSG00000027171	0.695569	0.774417	2.93871	0.0864796	0.176089	Prrg4	2	-1	104830741	104849876	non-DE
ENSMUSG00000019787	0.694899	1.39124	4.66531	0.0307778	0.0803789	Trdn	10	1	33080554	33476709	non-DE
ENSMUSG00000061143	0.694139	4.75714	14.1504	0.00016876	0.00159762	Maml3	3	-1	51685907	52105076	non-DE
ENSMUSG00000091985	0.694135	0.77997	5.18845	0.0227374	0.063479	Gm17354	4	-1	108633843	108637441	non-DE
ENSMUSG00000030256	0.693582	0.932927	2.31318	0.128282	0.235987	Bhlhe41	6	-1	145858243	145865558	non-DE
ENSMUSG00000025571	0.692851	5.67781	25.5674	4.27192e-07	2.24343e-05	Tnrc6c	11	1	117654289	117763439	non-DE
ENSMUSG00000030465	0.692696	4.27049	8.42773	0.0036954	0.0158742	Psd3	8	-1	67689082	68212027	non-DE
ENSMUSG00000055322	0.692576	5.4853	16.0718	6.09843e-05	0.000767374	Tns1	1	-1	73910231	74124449	non-DE
ENSMUSG00000056457	0.6925	1.64251	0.747748	0.38719	0.52748	Prl2c3	13	-1	12790816	12800079	non-DE
ENSMUSG00000042156	0.691459	5.15854	13.7093	0.000213397	0.00187767	Dzip1	14	-1	118875520	118925460	non-DE
ENSMUSG00000068373	0.690885	2.72449	6.82755	0.00897622	0.0313119	D430041D05Rik	2	-1	104143073	104411013	non-DE
ENSMUSG00000039607	0.690855	4.60854	13.6522	0.000219988	0.00191762	Rbms3	9	-1	116572746	117629913	non-DE
ENSMUSG00000002578	0.690818	2.71674	11.6644	0.000637087	0.00419502	Ikzf4	10	-1	128630843	128645991	non-DE
ENSMUSG00000026409	0.690725	1.75938	7.55855	0.0059726	0.0230095	Pfkfb2	1	-1	130689182	130729253	non-DE
ENSMUSG00000000305	0.690384	3.36898	11.7682	0.000602525	0.00402286	Cdh4	2	1	179442431	179899373	non-DE
ENSMUSG00000036246	0.690029	3.02454	8.97065	0.00274351	0.0126618	Gmip	8	1	69808679	69821870	non-DE
ENSMUSG00000071669	0.689751	2.61995	11.5385	0.000681686	0.00439776	Snx29	16	1	11322908	11755472	non-DE
ENSMUSG00000053930	0.689372	0.265649	4.04045	0.0444219	0.106361	Shisa6	11	-1	66211725	66525964	non-DE
ENSMUSG00000010476	0.689228	5.11655	10.615	0.00112175	0.00644004	Ebf3	7	-1	137193673	137314445	non-DE
ENSMUSG00000025938	0.689205	2.91877	6.31126	0.0119974	0.0391549	Slco5a1	1	-1	12866549	12992650	non-DE
ENSMUSG00000113831	0.688831	1.52615	5.4627	0.0194266	0.0564359		12	-1	118231595	118234564	non-DE
ENSMUSG00000039578	0.688752	1.43944	5.79505	0.0160714	0.0488308	Ccser1	6	1	61180324	62382865	non-DE
ENSMUSG00000037999	0.688642	1.55859	2.8751	0.0899594	0.181532	Arap2	5	-1	62602445	62766159	non-DE
ENSMUSG00000052713	0.688531	5.59449	20.5721	5.74276e-06	0.000144739	Zfp608	18	-1	54888045	54990180	non-DE
ENSMUSG00000044042	0.688266	1.94671	8.71203	0.00316117	0.0141515	Fmn1	2	1	113327736	113716767	non-DE
ENSMUSG00000059022	0.688266	2.40372	5.55959	0.0183797	0.0540573	Kcp	6	-1	29473162	29507952	non-DE
ENSMUSG00000027071	0.687937	1.71688	6.73637	0.00944666	0.032623	P2rx3	2	-1	84998583	85037462	non-DE
ENSMUSG00000042496	0.687876	4.40676	17.4853	2.89533e-05	0.00045093	Prdm10	9	1	31280538	31381723	non-DE
ENSMUSG00000022211	0.687775	3.28097	6.22534	0.0125935	0.0404651	Carmil3	14	1	55490651	55508272	non-DE
ENSMUSG00000067336	0.687733	6.08782	13.3174	0.000262957	0.00218527	Bmpr2	1	1	59763400	59879014	non-DE
ENSMUSG00000038070	0.687563	4.36998	10.5164	0.00118321	0.00671814	Cntln	4	1	84884309	85131921	non-DE
ENSMUSG00000093846	0.687389	0.000538502	3.89325	0.0484805	0.11375	Gm4425	12	-1	22115756	22156646	non-DE
ENSMUSG00000079466	0.686961	2.58376	9.33332	0.00225024	0.0108678	Prdm12	2	1	31640037	31655795	non-DE
ENSMUSG00000061414	0.686811	0.183369	4.27064	0.0387762	0.0958487	Cracr2a	6	1	127561338	127674248	non-DE
ENSMUSG00000097103	0.686714	0.0375132	4.13545	0.041994	0.101983	Gm2885	17	-1	6798390	6827990	non-DE
ENSMUSG00000021275	0.686252	4.38661	20.8143	5.06032e-06	0.000131718	Tecpr2	12	1	110889264	110972394	non-DE
ENSMUSG00000038437	0.685645	5.66845	11.593	0.000662008	0.00431357	Mllt6	11	1	97663414	97685463	non-DE
ENSMUSG00000100252	0.684904	4.33196	5.30149	0.0213072	0.0605133	Mir124-2hg	3	1	17789921	17808970	non-DE
ENSMUSG00000030683	0.684832	1.4972	3.48449	0.0619466	0.136951	Sez6l2	7	1	126950563	126970606	non-DE
ENSMUSG00000068748	0.684165	3.7334	6.75312	0.00935841	0.0323518	Ptprz1	6	1	22875502	23052916	non-DE
ENSMUSG00000026110	0.683361	3.59929	5.3994	0.0201437	0.0579901	Mgat4a	1	-1	37439340	37541016	non-DE
ENSMUSG00000019775	0.683318	1.08905	2.00704	0.15657	0.273638	Rgs17	10	-1	5825663	5922400	non-DE
ENSMUSG00000024998	0.683206	4.2227	16.0213	6.26336e-05	0.000781849	Plce1	19	1	38481109	38785030	non-DE
ENSMUSG00000039158	0.6831	3.65205	11.9391	0.000549682	0.00372773	Akna	4	-1	63367125	63403354	non-DE
ENSMUSG00000022521	0.68308	5.18502	16.8246	4.09984e-05	0.000578343	Crebbp	16	-1	4081328	4213997	non-DE
ENSMUSG00000069045	0.682785	5.82312	11.9801	0.000537706	0.00367124	Ddx3y	Y	-1	1260771	1286629	non-DE
ENSMUSG00000039801	0.682687	5.00809	21.5341	3.47587e-06	0.000100431	Cplane1	15	1	8169106	8271158	non-DE
ENSMUSG00000027312	0.682624	5.20126	19.3674	1.07833e-05	0.000222454	Atrn	2	1	130906495	131030333	non-DE
ENSMUSG00000066392	0.681659	0.209716	2.83776	0.0920723	0.184379	Nrxn3	12	1	88722876	90334935	non-DE
ENSMUSG00000036377	0.681606	6.33411	23.6122	1.1784e-06	4.80573e-05	C530008M17Rik	5	1	76656512	76873554	non-DE
ENSMUSG00000035847	0.681472	4.69628	19.1193	1.22795e-05	0.000239931	Ids	X	-1	70343069	70365084	non-DE
ENSMUSG00000020021	0.681001	4.50511	19.6198	9.4484e-06	0.000203767	Fgd6	10	1	94036001	94145339	non-DE
ENSMUSG00000038369	0.680941	5.92132	20.3811	6.34521e-06	0.000154607	Ncoa6	2	-1	155390656	155473894	non-DE
ENSMUSG00000001065	0.680203	3.72105	15.2704	9.31661e-05	0.00102909	Zfp276	8	1	123254195	123269745	non-DE
ENSMUSG00000045515	0.679679	5.89895	16.8777	3.98669e-05	0.000566118	Pou3f3	1	1	42695768	42703176	non-DE
ENSMUSG00000055435	0.67952	3.25967	7.63799	0.00571516	0.022189	Maf	8	-1	115682942	115707794	non-DE
ENSMUSG00000035168	0.679216	5.27729	20.5683	5.75415e-06	0.000144744	Tanc1	2	1	59612042	59846149	non-DE
ENSMUSG00000021972	0.67888	5.36493	19.8463	8.39272e-06	0.000188993	Hmbox1	14	-1	64811600	64949871	non-DE
ENSMUSG00000003154	0.678847	3.25501	8.43556	0.00367954	0.0158206	Foxj2	6	1	122819914	122845366	non-DE
ENSMUSG00000026494	0.678382	5.20448	14.0738	0.000175778	0.00164224	Kif26b	1	1	178529125	178939200	non-DE
ENSMUSG00000028351	0.678353	1.42047	3.5998	0.0577865	0.129999	Brinp1	4	-1	68761514	68954397	non-DE
ENSMUSG00000033847	0.678198	0.785787	5.07578	0.0242623	0.0667648	Pla2g4c	7	1	13324655	13360672	non-DE
ENSMUSG00000031393	0.678121	5.83876	16.1607	5.81895e-05	0.000744075	Mecp2	X	-1	74026592	74135363	non-DE
ENSMUSG00000032410	0.677825	5.43073	12.3485	0.000441337	0.0031803	Xrn1	9	1	95954760	96057803	non-DE
ENSMUSG00000055670	0.677749	4.60062	21.2718	3.98547e-06	0.000111531	Zzef1	11	1	72796226	72927120	non-DE
ENSMUSG00000074971	0.677291	2.73407	4.4492	0.0349175	0.0884468	Fibin	2	-1	110360917	110363183	non-DE
ENSMUSG00000058914	0.676965	3.2582	7.47589	0.00625307	0.0238627	C1qtnf3	15	1	10952332	10980150	non-DE
ENSMUSG00000034973	0.676121	3.83162	15.9419	6.53174e-05	0.00080594	Dop1a	9	1	86467154	86555923	non-DE
ENSMUSG00000026459	0.675853	2.92845	7.38075	0.00659255	0.0248541	Myog	1	1	134289989	134292548	non-DE
ENSMUSG00000061589	0.675808	5.73341	19.6701	9.20311e-06	0.000200208	Dot1l	10	1	80755206	80795461	non-DE
ENSMUSG00000014361	0.675509	3.18865	8.46395	0.00362254	0.0156656	Mertk	2	1	128698956	128802894	non-DE
ENSMUSG00000002908	0.675211	2.32576	5.29427	0.0213957	0.0606495	Kcnn1	8	-1	70842049	70863258	non-DE
ENSMUSG00000020052	0.674847	3.851	18.3552	1.83315e-05	0.000325081	Ascl1	10	-1	87490819	87493660	non-DE
ENSMUSG00000042473	0.67472	2.64556	4.8472	0.027691	0.073996	Tbc1d8b	X	1	139684996	139753405	non-DE
ENSMUSG00000026764	0.674655	6.64622	16.1497	5.85275e-05	0.000744075	Kif5c	2	1	49619298	49774778	non-DE
ENSMUSG00000037660	0.674442	0.540622	3.89242	0.0485044	0.11378	Gdf7	12	-1	8297918	8301954	non-DE
ENSMUSG00000029673	0.673901	5.52952	19.8824	8.23556e-06	0.000186196	Auts2	5	-1	131437333	132543344	non-DE
ENSMUSG00000046982	0.673795	6.28041	26.4333	2.72798e-07	1.65302e-05	Tshz1	18	-1	84011627	84086404	non-DE
ENSMUSG00000037003	0.673685	3.76734	13.7844	0.000205035	0.00182014	Tns2	15	1	102100413	102116401	non-DE
ENSMUSG00000042500	0.673297	2.01275	4.52723	0.0333596	0.0855834	Ago4	4	-1	126489541	126533472	non-DE
ENSMUSG00000032181	0.673271	3.67861	8.62449	0.00331674	0.0146652	Scg3	9	-1	75643189	75684056	non-DE
ENSMUSG00000033949	0.673174	2.82847	6.75453	0.00935102	0.032345	Trim36	18	-1	46165302	46212607	non-DE
ENSMUSG00000059495	0.672566	6.45353	15.9426	6.5292e-05	0.00080594	Arhgef12	9	-1	42963842	43107239	non-DE
ENSMUSG00000039683	0.672464	2.93923	12.8697	0.000333942	0.00259912	Sdk1	5	1	141241490	142215586	non-DE
ENSMUSG00000032827	0.672286	5.27228	12.9622	0.000317845	0.00250906	Ppp1r9a	6	1	4902917	5165661	non-DE
ENSMUSG00000021738	0.672285	3.79177	13.3857	0.000253553	0.00213198	Atxn7	14	1	13961440	14107302	non-DE
ENSMUSG00000020231	0.672156	4.51372	16.0687	6.10847e-05	0.000767579	Dip2a	10	-1	76259429	76345291	non-DE
ENSMUSG00000036019	0.67147	4.24278	19.0213	1.29268e-05	0.000249003	Tmtc2	10	-1	105187663	105574451	non-DE
ENSMUSG00000073716	0.6712	-0.0135234	2.99638	0.0834508	0.171003	Gm13241	4	1	146475332	146476111	non-DE
ENSMUSG00000028339	0.671144	3.723	13.8913	0.000193691	0.00176515	Col15a1	4	1	47208161	47313167	non-DE
ENSMUSG00000020681	0.670414	0.581289	2.4849	0.114944	0.217684	Ace	11	1	105967945	105989964	non-DE
ENSMUSG00000000708	0.670296	3.10544	9.26094	0.00234092	0.0111653	Kat2b	17	1	53566861	53672720	non-DE
ENSMUSG00000055407	0.669256	4.38267	16.8475	4.05064e-05	0.000573024	Map6	7	1	99267447	99337137	non-DE
ENSMUSG00000005611	0.668961	1.72849	4.0079	0.0452875	0.107916	Mrvi1	7	-1	110868266	110982461	non-DE
ENSMUSG00000038538	0.668425	5.79472	13.4278	0.000247922	0.00209878	Ubn2	6	1	38433950	38524825	non-DE
ENSMUSG00000064356	0.66841	1.90635	2.19606	0.138364	0.249927	mt-Atp8	MT	1	7766	7969	non-DE
ENSMUSG00000040033	0.668371	3.34266	10.9838	0.000919122	0.00553415	Stat2	10	1	128270559	128292849	non-DE
ENSMUSG00000030451	0.668343	5.82123	14.5857	0.000133928	0.00134954	Herc2	7	1	56050196	56231800	non-DE
ENSMUSG00000022053	0.667862	4.51332	14.866	0.000115427	0.00121527	Ebf2	14	1	67233292	67430918	non-DE
ENSMUSG00000036006	0.667791	1.82593	6.08496	0.0136337	0.0430407	Ripor2	13	1	24582189	24733816	non-DE
ENSMUSG00000035184	0.667664	1.40046	6.13196	0.013276	0.0421335	Fam124a	14	1	62555737	62608486	non-DE
ENSMUSG00000038664	0.666229	6.01558	9.80478	0.00174059	0.00897704	Herc1	9	1	66350450	66508775	non-DE
ENSMUSG00000031284	0.66568	3.85591	6.90032	0.00861802	0.0303782	Pak3	X	1	143518591	143797796	non-DE
ENSMUSG00000035969	0.66549	3.3434	6.84813	0.00887341	0.0310866	Rusc2	4	1	43381979	43427088	non-DE
ENSMUSG00000108348	0.665401	2.01241	7.0513	0.00792076	0.0285045	Gm42372	7	1	16983086	16988152	non-DE
ENSMUSG00000028282	0.66491	6.65683	23.1471	1.50066e-06	5.62917e-05	Casp8ap2	4	1	32615451	32653265	non-DE
ENSMUSG00000031433	0.664153	3.6402	12.0186	0.000526721	0.00362101	Rbm41	X	-1	139889511	139998595	non-DE
ENSMUSG00000093979	0.663788	0.835387	3.70973	0.054096	0.123574	Gm2237	14	-1	19563800	19585135	non-DE
ENSMUSG00000026879	0.663738	3.96915	3.94375	0.0470458	0.11122	Gsn	2	1	35256380	35307892	non-DE
ENSMUSG00000005886	0.663674	6.1258	25.0914	5.46769e-07	2.68311e-05	Ncoa2	1	-1	13139105	13374083	non-DE
ENSMUSG00000027508	0.663629	4.7761	13.9549	0.000187245	0.00171933	Pag1	3	-1	9687479	9833679	non-DE
ENSMUSG00000068740	0.663591	5.90286	9.854	0.00169463	0.00879454	Celsr2	3	-1	108390851	108415552	non-DE
ENSMUSG00000003032	0.663418	1.8298	4.80294	0.0284112	0.0755428	Klf4	4	-1	55527143	55532466	non-DE
ENSMUSG00000048154	0.663415	5.26994	8.91724	0.00282491	0.0129575	Kmt2d	15	-1	98831669	98871204	non-DE
ENSMUSG00000020121	0.66257	4.37678	12.3509	0.000440765	0.00317967	Srgap1	10	-1	121780991	122047315	non-DE
ENSMUSG00000050132	0.662479	2.09828	7.68013	0.0055832	0.0218011	Sarm1	11	-1	78472330	78497754	non-DE
ENSMUSG00000050556	0.662071	1.7106	6.23708	0.0125103	0.0402843	Kcnb1	2	-1	167095969	167190155	non-DE
ENSMUSG00000024502	0.662016	3.91353	10.7699	0.00103163	0.00604323	Jakmip2	18	-1	43531408	43687773	non-DE
ENSMUSG00000025586	0.661959	0.410986	1.87406	0.171011	0.292383	Cpeb1	7	-1	81347026	81455465	non-DE
ENSMUSG00000096225	0.661871	2.18314	7.28151	0.00696681	0.025874	Lhx8	3	-1	154306294	154330659	non-DE
ENSMUSG00000019790	0.661861	3.83693	10.8715	0.00097655	0.00578395	Stxbp5	10	-1	9755547	9901079	non-DE
ENSMUSG00000021719	0.661506	1.09506	5.84543	0.0156175	0.0477328	Rgs7bp	13	-1	104945904	105054930	non-DE
ENSMUSG00000041444	0.660934	5.50518	15.5151	8.18487e-05	0.000933712	Arhgap32	9	1	32116136	32268446	non-DE
ENSMUSG00000045282	0.660796	1.41151	3.21031	0.0731756	0.155372	Tmem86b	7	-1	4628040	4631422	non-DE
ENSMUSG00000013076	0.660576	6.8805	20.0342	7.60685e-06	0.000174887	Amotl1	9	-1	14541966	14645056	non-DE
ENSMUSG00000070808	0.660387	4.02721	13.8506	0.000197932	0.00178246	Bicra	7	-1	15970672	16047921	non-DE
ENSMUSG00000033871	0.659783	0.940612	4.60922	0.0318005	0.0823458	Ppargc1b	18	-1	61298136	61400431	non-DE
ENSMUSG00000066894	0.65914	2.40006	9.01879	0.00267219	0.0123861	Vsig10	5	1	117319083	117355005	non-DE
ENSMUSG00000062785	0.659009	1.12535	4.83355	0.0279112	0.0744513	Kcnc3	7	1	44590664	44604754	non-DE
ENSMUSG00000043913	0.658873	0.0626581	3.93682	0.0472399	0.111538	Ccdc60	5	-1	116124641	116288985	non-DE
ENSMUSG00000057894	0.658796	4.23027	10.7682	0.00103258	0.00604643	Zfp329	7	-1	12804977	12818858	non-DE
ENSMUSG00000044636	0.658634	4.29207	21.2161	4.10295e-06	0.000114171	Csrnp2	15	-1	100479570	100495488	non-DE
ENSMUSG00000020354	0.658255	1.2069	3.86498	0.0493038	0.115158	Sgcd	11	-1	46896253	47988969	non-DE
ENSMUSG00000028760	0.658244	6.93362	27.2185	1.81712e-07	1.20875e-05	Eif4g3	4	1	137993022	138208508	non-DE
ENSMUSG00000054280	0.657968	5.62486	18.0878	2.10946e-05	0.000357152	Prr14l	5	-1	32789820	32854256	non-DE
ENSMUSG00000026153	0.65757	5.81391	16.6596	4.47241e-05	0.000614655	Fam135a	1	-1	24011093	24100341	non-DE
ENSMUSG00000073043	0.657225	1.65872	6.59772	0.0102109	0.0346626	Atoh1	6	1	64729125	64731245	non-DE
ENSMUSG00000074505	0.656741	4.35963	6.16629	0.0130207	0.0415082	Fat3	9	-1	15910189	16501285	non-DE
ENSMUSG00000018412	0.656706	6.37611	22.7927	1.80449e-06	6.45024e-05	Kansl1	11	-1	104333229	104468861	non-DE
ENSMUSG00000028546	0.656065	5.45645	13.5709	0.000229719	0.00198511	Elavl4	4	-1	110203722	110351909	non-DE
ENSMUSG00000040896	0.655929	1.57192	6.33596	0.0118314	0.0387484	Kcnd3	3	1	105452330	105674002	non-DE
ENSMUSG00000025324	0.655819	2.63147	8.7741	0.00305539	0.0137949	Atp10a	7	1	58656166	58829420	non-DE
ENSMUSG00000039834	0.655814	3.86329	16.2482	5.55616e-05	0.000719369	Zfp335	2	-1	164891882	164911757	non-DE
ENSMUSG00000030729	0.655464	5.30734	18.1792	2.01063e-05	0.000343922	Pgm2l1	7	1	100227394	100278868	non-DE
ENSMUSG00000058690	0.654782	5.25267	12.3281	0.000446199	0.003203	Ccser2	14	-1	36874936	36968777	non-DE
ENSMUSG00000052812	0.65438	6.46459	18.0526	2.14887e-05	0.000360805	Atad2b	12	1	4917353	5047394	non-DE
ENSMUSG00000038039	0.654158	5.69992	16.9291	3.88022e-05	0.000555744	Gcc2	10	1	58255497	58305599	non-DE
ENSMUSG00000070565	0.653945	4.97354	13.4194	0.000249037	0.00210703	Rasal2	1	-1	157135182	157412595	non-DE
ENSMUSG00000035011	0.653693	3.73358	8.75149	0.00309349	0.0139291	Zbtb7a	10	1	81135220	81152995	non-DE
ENSMUSG00000028838	0.653128	1.18044	3.33671	0.0677499	0.146407	Extl1	4	-1	134356372	134383850	non-DE
ENSMUSG00000070327	0.652876	2.83608	7.77613	0.0052941	0.0209068	Rnf213	11	1	119393100	119487418	non-DE
ENSMUSG00000039262	0.65264	7.95193	26.0833	3.27006e-07	1.85834e-05	Prrc2b	2	1	32151082	32234537	non-DE
ENSMUSG00000038766	0.652439	6.51589	21.0494	4.47598e-06	0.000120924	Gabpb2	3	-1	95181766	95217916	non-DE
ENSMUSG00000036792	0.65187	4.13922	12.4229	0.000424101	0.00309112	Mbd5	2	1	48949508	49325405	non-DE
ENSMUSG00000042082	0.651544	2.31398	5.77768	0.016231	0.049166	Arsb	13	1	93771630	93943016	non-DE
ENSMUSG00000030554	0.651076	2.23884	5.84912	0.0155849	0.0476601	Synm	7	-1	67730160	67759742	non-DE
ENSMUSG00000021188	0.651015	4.71177	11.607	0.000657029	0.00429268	Trip11	12	-1	101834043	101913267	non-DE
ENSMUSG00000068859	0.650657	0.825394	5.63739	0.0175813	0.05227	Sp9	2	1	73271925	73284706	non-DE
ENSMUSG00000027500	0.650368	5.95603	8.77796	0.00304892	0.013774	Stmn2	3	1	8509360	8561606	non-DE
ENSMUSG00000072962	0.650275	0.7841	2.94307	0.0862465	0.175674	Gm16401	5	1	44100442	44102515	non-DE
ENSMUSG00000029862	0.649716	0.235354	2.62444	0.10523	0.203406	Clcn1	6	1	42286685	42315756	non-DE
ENSMUSG00000028341	0.649519	0.726101	5.72639	0.0167118	0.0503416	Nr4a3	4	1	48045153	48086447	non-DE
ENSMUSG00000031079	0.649358	1.70787	5.16055	0.0231056	0.0643509	Zfp300	X	-1	21079174	21089527	non-DE
ENSMUSG00000043557	0.648835	2.11389	4.45352	0.0348293	0.0883393	Mdga1	17	-1	29827949	29970087	non-DE
ENSMUSG00000037416	0.648466	5.7748	13.3443	0.000259212	0.00216739	Dmxl1	18	1	49832670	49965473	non-DE
ENSMUSG00000026923	0.648363	5.8532	10.5525	0.00116033	0.00661337	Notch1	2	-1	26457903	26516663	non-DE
ENSMUSG00000036617	0.648059	4.86214	14.5592	0.000135827	0.00135709	Etl4	2	1	19909780	20810713	non-DE
ENSMUSG00000057286	0.648037	0.997063	1.56397	0.211085	0.341658	St6galnac2	11	-1	116675303	116694868	non-DE
ENSMUSG00000111128	0.647541	2.17062	6.20107	0.0127673	0.0408921	Gm49338	9	-1	45858604	45860682	non-DE
ENSMUSG00000023960	0.647442	2.00608	6.25328	0.0123963	0.0400293	Enpp5	17	1	44078813	44086567	non-DE
ENSMUSG00000029190	0.647434	5.94841	22.5409	2.05715e-06	7.04563e-05	D5Ertd579e	5	-1	36600485	36696024	non-DE
ENSMUSG00000033799	0.647062	6.50806	24.6581	6.84568e-07	3.11427e-05	Fam208b	13	-1	3566035	3611108	non-DE
ENSMUSG00000027350	0.646717	1.62505	5.33239	0.0209327	0.0597709	Chgb	2	1	132781278	132795079	non-DE
ENSMUSG00000025658	0.646689	3.4209	11.0971	0.000864625	0.00527767	Cnksr2	X	-1	157821436	158043294	non-DE
ENSMUSG00000083116	0.645922	0.671761	5.01891	0.0250719	0.0683144	Gm13410	2	1	24178834	24180317	non-DE
ENSMUSG00000038765	0.645887	4.36193	16.1804	5.75865e-05	0.000739825	Lmx1b	2	-1	33560965	33640511	non-DE
ENSMUSG00000035104	0.64551	1.87144	2.06073	0.151138	0.266158	Eva1a	6	1	82041043	82093099	non-DE
ENSMUSG00000036202	0.645474	7.03891	18.3767	1.81264e-05	0.000322589	Rif1	2	1	52072832	52122383	non-DE
ENSMUSG00000034525	0.645473	6.69062	20.0793	7.42949e-06	0.000171866	Ice1	13	-1	70551707	70637634	non-DE
ENSMUSG00000085282	0.645211	0.676069	4.03965	0.044443	0.106377	Gm15663	10	1	105573953	105583874	non-DE
ENSMUSG00000002910	0.64503	1.65202	6.56199	0.010418	0.0351977	Arrdc2	8	-1	70835129	70839720	non-DE
ENSMUSG00000044647	0.644739	3.96261	13.6397	0.00022145	0.001927	Csrnp3	2	1	65845767	66031546	non-DE
ENSMUSG00000039137	0.644731	3.53939	13.0656	0.000300769	0.00240985	Whrn	4	-1	63414910	63495991	non-DE
ENSMUSG00000029754	0.644477	1.66335	7.82881	0.005142	0.0204419	Dlx6	6	1	6863334	6868568	non-DE
ENSMUSG00000033952	0.644182	6.48672	19.1791	1.19008e-05	0.000236233	Aspm	1	1	139454772	139494091	non-DE
ENSMUSG00000043279	0.644024	3.92806	9.40404	0.00216508	0.0105553	Trim56	5	-1	137105644	137116209	non-DE
ENSMUSG00000029438	0.643277	6.19564	19.8067	8.56803e-06	0.000191686	Bcl7a	5	1	123343834	123374992	non-DE
ENSMUSG00000063626	0.64322	0.726662	3.05118	0.0806783	0.167036	Unc5d	8	-1	28646717	29219636	non-DE
ENSMUSG00000021782	0.64309	6.48717	16.2427	5.5724e-05	0.000720848	Dlg5	14	-1	24133953	24245920	non-DE
ENSMUSG00000036882	0.642739	4.52043	10.8501	0.000987917	0.00583971	Arhgap33	7	-1	30522226	30535060	non-DE
ENSMUSG00000025237	0.642713	4.19324	7.76642	0.00532264	0.0210029	Parp6	9	1	59617284	59650285	non-DE
ENSMUSG00000045659	0.642548	4.65917	17.3815	3.05793e-05	0.000466545	Plekha7	7	-1	116123485	116308376	non-DE
ENSMUSG00000037475	0.642456	6.59612	14.8646	0.000115508	0.00121527	Thoc2	X	-1	41794991	41920674	non-DE
ENSMUSG00000014498	0.642449	5.86853	24.6825	6.75962e-07	3.08449e-05	Ankrd52	10	1	128377115	128408704	non-DE
ENSMUSG00000021779	0.642289	0.425122	4.4361	0.0351864	0.0889737	Thrb	14	1	17660261	18038090	non-DE
ENSMUSG00000049871	0.641894	0.586772	3.35432	0.067029	0.145332	Nlrc3	16	-1	3945007	3976632	non-DE
ENSMUSG00000020074	0.641734	7.58557	53.4436	2.66128e-13	1.32771e-09	Ccar1	10	-1	62743928	62792286	non-DE
ENSMUSG00000055884	0.641617	4.92512	14.6816	0.000127284	0.00130127	Fancm	12	1	65075603	65132058	non-DE
ENSMUSG00000022408	0.641613	0.930591	3.32698	0.0681521	0.146984	Fam83f	15	1	80671847	80700425	non-DE
ENSMUSG00000041836	0.640611	0.669425	3.08502	0.0790165	0.164324	Ptpre	7	1	135537481	135686293	non-DE
ENSMUSG00000034706	0.64056	0.563382	3.43498	0.0638294	0.139976	Dnaic2	11	1	114727408	114757889	non-DE
ENSMUSG00000030657	0.640334	3.81762	10.4548	0.00122331	0.00690658	Xylt1	7	1	117380979	117673580	non-DE
ENSMUSG00000041642	0.639966	5.82464	14.1391	0.000169777	0.00160421	Kif21b	1	1	136131389	136177998	non-DE
ENSMUSG00000033860	0.639781	0.997135	3.10475	0.0780644	0.162842	Fgg	3	1	83007724	83015049	non-DE
ENSMUSG00000055053	0.639767	3.46347	11.3945	0.000736604	0.00467441	Nfic	10	-1	81396186	81455635	non-DE
ENSMUSG00000026883	0.63934	6.41473	20.4374	6.16136e-06	0.000151923	Dab2ip	2	1	35558266	35730994	non-DE
ENSMUSG00000031441	0.638873	5.3629	9.96204	0.00159801	0.00842212	Atp11a	8	1	12757014	12868728	non-DE
ENSMUSG00000028977	0.638109	2.86405	13.0241	0.000307508	0.00244672	Casz1	4	1	148804429	148954889	non-DE
ENSMUSG00000019577	0.636854	0.903394	3.51502	0.060815	0.135107	Pdk4	6	-1	5483351	5496309	non-DE
ENSMUSG00000069170	0.636851	4.30602	7.49493	0.00618728	0.0236781	Adgrv1	13	-1	81095068	81633154	non-DE
ENSMUSG00000022508	0.636625	0.115309	1.00429	0.316275	0.456831	Bcl6	16	-1	23965052	23988852	non-DE
ENSMUSG00000021140	0.636586	5.90371	18.1494	2.04238e-05	0.000348315	Pcnx	12	1	81860023	82000924	non-DE
ENSMUSG00000020827	0.636561	4.92821	12.6994	0.000365772	0.00278035	Mink1	11	1	70562881	70614483	non-DE
ENSMUSG00000085463	0.63648	0.314877	4.29186	0.0382953	0.0949108	9430024E24Rik	2	-1	33716361	33718899	non-DE
ENSMUSG00000035173	0.636456	5.2685	15.2264	9.53608e-05	0.00104869	Ccdc186	19	-1	56787481	56822190	non-DE
ENSMUSG00000048106	0.636452	4.03557	13.0351	0.000305708	0.00243639	4632415L05Rik	3	1	19894886	19898984	non-DE
ENSMUSG00000033066	0.635246	2.74411	7.97543	0.00474164	0.0191806	Gas7	11	1	67455437	67688990	non-DE
ENSMUSG00000051984	0.635134	0.252238	4.06377	0.0438126	0.105307	Sec31b	19	-1	44516957	44545864	non-DE
ENSMUSG00000005442	0.635059	6.12432	15.7915	7.07191e-05	0.000846762	Cic	7	1	25267704	25294159	non-DE
ENSMUSG00000029505	0.63504	6.7333	22.2662	2.37354e-06	7.77321e-05	Ep400	5	-1	110664373	110770717	non-DE
ENSMUSG00000068959	0.634499	2.62237	8.84867	0.00293303	0.0133837	Zfp619	7	1	39517766	39540420	non-DE
ENSMUSG00000007817	0.6344	6.89422	26.387	2.79414e-07	1.66888e-05	Zmiz1	14	1	25459185	25666743	non-DE
ENSMUSG00000040037	0.634188	2.09191	7.0085	0.00811238	0.0290474	Negr1	3	1	156561794	157316445	non-DE
ENSMUSG00000042439	0.633975	6.06057	23.246	1.42545e-06	5.45643e-05	Zfp532	18	1	65580230	65689443	non-DE
ENSMUSG00000026589	0.633894	1.04599	5.48	0.0192353	0.0559779	Sec16b	1	1	157506728	157568425	non-DE
ENSMUSG00000071856	0.63384	4.13129	13.6717	0.000217713	0.0019056	Mcc	18	-1	44425060	44812182	non-DE
ENSMUSG00000040610	0.633723	1.23403	3.40016	0.06519	0.142147	Tlx3	11	-1	33200752	33203589	non-DE
ENSMUSG00000034813	0.633349	4.38081	11.351	0.000754084	0.00475416	Grip1	10	1	119453830	120087261	non-DE
ENSMUSG00000022883	0.633158	6.28748	15.7867	7.08984e-05	0.000848231	Robo1	16	1	72308306	73046095	non-DE
ENSMUSG00000045871	0.632752	3.87431	9.63283	0.00191129	0.00963501	Slitrk6	14	-1	110748580	110755149	non-DE
ENSMUSG00000040713	0.632575	5.34829	1.30587	0.253143	0.390718	Creg1	1	1	165763746	165775308	non-DE
ENSMUSG00000021983	0.632349	1.60344	4.3794	0.0363757	0.0912717	Atp8a2	14	-1	59638540	60197179	non-DE
ENSMUSG00000041540	0.632298	4.16478	11.0432	0.000890136	0.00540254	Sox5	6	-1	143828425	144781977	non-DE
ENSMUSG00000038224	0.632201	2.29775	1.2697	0.259823	0.398154	Serpinf2	11	-1	75431732	75439591	non-DE
ENSMUSG00000026436	0.63173	3.79199	10.1122	0.00147293	0.00793856	Elk4	1	1	132007607	132032612	non-DE
ENSMUSG00000051427	0.631645	3.26737	6.86926	0.00876912	0.0308092	Ccdc157	11	-1	4141123	4160293	non-DE
ENSMUSG00000037736	0.631546	6.17393	21.2281	4.0774e-06	0.000113855	Limch1	5	1	66745827	67057158	non-DE
ENSMUSG00000060429	0.631022	1.79674	5.72148	0.0167586	0.0504049	Sntb1	15	-1	55636388	55906949	non-DE
ENSMUSG00000045589	0.630914	1.87042	6.39308	0.0114566	0.0377938	Frrs1l	4	-1	56957173	56990391	non-DE
ENSMUSG00000021611	0.630618	3.20769	8.35859	0.00383868	0.016322	Tert	13	1	73626911	73649843	non-DE
ENSMUSG00000026135	0.630549	4.28067	16.2031	5.69011e-05	0.000733382	Zfp142	1	-1	74565127	74588246	non-DE
ENSMUSG00000041362	0.630326	1.99999	5.55157	0.0184641	0.0542398	Shtn1	19	-1	58973358	59076069	non-DE
ENSMUSG00000010175	0.630316	3.63804	11.942	0.000548828	0.00372362	Prox1	1	-1	190118035	190170714	non-DE
ENSMUSG00000001248	0.630209	5.001	7.97816	0.0047345	0.019162	Gramd1a	7	-1	31130127	31155896	non-DE
ENSMUSG00000069729	0.630163	6.1788	19.662	9.24196e-06	0.000200761	Arid1b	17	1	4994332	5347656	non-DE
ENSMUSG00000053080	0.629458	6.41956	21.9613	2.78199e-06	8.6927e-05	2700081O15Rik	19	1	7417625	7425904	non-DE
ENSMUSG00000037210	0.628907	5.76057	36.0258	1.94724e-09	4.85739e-07	Fam193a	5	1	34369933	34486456	non-DE
ENSMUSG00000007279	0.628867	3.24423	11.1652	0.00083344	0.00512283	Scube2	7	-1	109798676	109865679	non-DE
ENSMUSG00000024261	0.628404	1.07773	2.81045	0.0936519	0.186618	Syt4	18	-1	31437808	31447406	non-DE
ENSMUSG00000021306	0.628272	4.2225	11.2303	0.000804742	0.0050019	Gpr137b	13	-1	13357620	13394014	non-DE
ENSMUSG00000060716	0.628213	4.47217	18.4506	1.74364e-05	0.000313666	Plekhh1	12	1	79029163	79081655	non-DE
ENSMUSG00000094595	0.627506	0.650089	4.25739	0.0390799	0.0964084	Fsbp	4	1	11579665	11587591	non-DE
ENSMUSG00000052889	0.627142	1.63892	4.14138	0.041847	0.101659	Prkcb	7	1	122288751	122634402	non-DE
ENSMUSG00000040865	0.626824	4.70921	10.5157	0.00118366	0.00671816	Ino80d	1	-1	62958418	63114667	non-DE
ENSMUSG00000034303	0.6268	2.39104	5.52933	0.0187003	0.0547937	Ccdc15	9	-1	37275835	37348432	non-DE
ENSMUSG00000059974	0.626631	2.87145	6.83128	0.00895752	0.0312802	Ntm	9	-1	28994750	29963141	non-DE
ENSMUSG00000034059	0.626498	0.538798	2.71718	0.0992735	0.194633	Ypel4	2	1	84734058	84738655	non-DE
ENSMUSG00000019820	0.626104	6.454	13.0708	0.000299928	0.00240569	Utrn	10	-1	12382188	12869365	non-DE
ENSMUSG00000019803	0.626098	3.60199	10.7851	0.00102319	0.00600551	Nr2e1	10	-1	42561963	42583632	non-DE
ENSMUSG00000027849	0.625948	0.216573	3.20142	0.0735745	0.155987	Syt6	3	1	103575231	103645569	non-DE
ENSMUSG00000035164	0.625857	4.3056	13.6159	0.000224281	0.00194517	Zc3h12c	9	-1	52111344	52168572	non-DE
ENSMUSG00000032503	0.625036	0.74147	5.24274	0.0220386	0.0620137	Arpp21	9	-1	112065091	112235938	non-DE
ENSMUSG00000042810	0.624498	4.64411	12.2606	0.000462624	0.00328753	Krba1	6	1	48395586	48419781	non-DE
ENSMUSG00000015533	0.624491	1.79497	6.84738	0.00887715	0.0310866	Itga2	13	-1	114833081	114932100	non-DE
ENSMUSG00000029291	0.624482	5.41939	12.64	0.000377579	0.00284983	Rufy3	5	1	88565040	88651392	non-DE
ENSMUSG00000027309	0.624431	4.93251	11.3848	0.000740478	0.00469268	4930402H24Rik	2	-1	130706200	130906406	non-DE
ENSMUSG00000028753	0.624126	0.173522	2.84506	0.0916549	0.183929	Vwa5b1	4	-1	138565360	138635884	non-DE
ENSMUSG00000040524	0.623873	6.42472	21.5779	3.39743e-06	9.95094e-05	Zfp609	9	-1	65692391	65827564	non-DE
ENSMUSG00000038677	0.623452	6.57345	34.0009	5.50852e-09	9.94659e-07	Scube3	17	1	28142141	28174854	non-DE
ENSMUSG00000029705	0.623372	6.25545	20.342	6.47625e-06	0.000156087	Cux1	5	-1	136248135	136567490	non-DE
ENSMUSG00000022240	0.623287	3.82813	15.3792	8.79492e-05	0.00098602	Ctnnd2	15	1	30172593	31029341	non-DE
ENSMUSG00000020658	0.623271	4.52217	18.7391	1.4988e-05	0.00027936	Efr3b	12	-1	3962554	4038915	non-DE
ENSMUSG00000002325	0.623241	2.60666	4.52797	0.0333451	0.0855609	Irf9	14	1	55603571	55610030	non-DE
ENSMUSG00000031840	0.623214	2.17624	5.63807	0.0175746	0.05227	Rab3a	8	1	70754679	70758677	non-DE
ENSMUSG00000030016	0.622936	7.37291	27.6456	1.45703e-07	1.03352e-05	Zfp638	6	1	83867109	83989550	non-DE
ENSMUSG00000020721	0.622338	5.79733	22.7379	1.85673e-06	6.55417e-05	Helz	11	1	107547930	107693826	non-DE
ENSMUSG00000059674	0.622303	4.03406	12.1245	0.000497627	0.00346257	Cdh24	14	-1	54631231	54641364	non-DE
ENSMUSG00000031101	0.622283	0.462791	2.86728	0.0903976	0.182195	Sash3	X	1	48146436	48161565	non-DE
ENSMUSG00000056342	0.622237	7.13761	13.9033	0.000192458	0.00175642	Usp34	11	1	23306895	23490560	non-DE
ENSMUSG00000021819	0.622165	6.17519	25.9215	3.55586e-07	1.94947e-05	Zswim8	14	1	20707552	20723619	non-DE
ENSMUSG00000028159	0.62186	1.47915	3.67717	0.0551624	0.125493	Dapp1	3	-1	137931007	137981545	non-DE
ENSMUSG00000021375	0.621707	5.83558	17.9009	2.32714e-05	0.000383172	Kif13a	13	-1	46749087	46929867	non-DE
ENSMUSG00000035248	0.621705	5.48893	16.2931	5.42624e-05	0.000704988	Tut7	13	-1	59771561	59823147	non-DE
ENSMUSG00000015944	0.621377	4.18655	16.5613	4.71017e-05	0.000634824	Castor2	5	1	134099711	134144343	non-DE
ENSMUSG00000022641	0.6213	5.96057	10.7564	0.00103921	0.00607096	Bbx	16	-1	50191844	50432390	non-DE
ENSMUSG00000039477	0.621279	6.71047	17.267	3.24773e-05	0.00048804	Tnrc18	5	-1	142724661	142817662	non-DE
ENSMUSG00000061751	0.62081	4.87729	8.48532	0.00358023	0.015523	Kalrn	16	-1	33969073	34573532	non-DE
ENSMUSG00000020836	0.620423	0.0342022	3.38154	0.0659306	0.143428	Coro6	11	1	77462411	77470484	non-DE
ENSMUSG00000113184	0.620383	1.04081	2.38183	0.122754	0.2286		12	-1	81717830	81720052	non-DE
ENSMUSG00000020189	0.620333	5.18546	14.2748	0.000157968	0.00152098	Osbpl8	10	1	111164752	111297249	non-DE
ENSMUSG00000032420	0.620201	1.94113	3.94157	0.0471067	0.111311	Nt5e	9	1	88327197	88372092	non-DE
ENSMUSG00000032363	0.620119	4.15818	15.4033	8.6836e-05	0.000974999	Adamts7	9	1	90163069	90208071	non-DE
ENSMUSG00000000214	0.618989	1.53876	4.26092	0.0389989	0.0962719	Th	7	-1	142892752	142931128	non-DE
ENSMUSG00000028626	0.618402	2.7361	7.03592	0.00798909	0.0287021	Col9a2	4	1	121039385	121055322	non-DE
ENSMUSG00000042249	0.618341	2.4696	5.96397	0.0146011	0.0453768	Grk3	5	-1	112910482	113015791	non-DE
ENSMUSG00000044067	0.618321	0.361835	2.8452	0.0916473	0.183929	Gpr22	12	-1	31706867	31713947	non-DE
ENSMUSG00000021699	0.618142	3.4063	14.2304	0.000161739	0.00154779	Pde4d	13	1	108449948	109953461	non-DE
ENSMUSG00000034910	0.617846	5.15712	12.5361	0.000399158	0.00296781	Pygo1	9	1	72925645	72952181	non-DE
ENSMUSG00000055204	0.617566	7.24256	34.0032	5.50207e-09	9.94659e-07	Ankrd17	5	-1	90227166	90366577	non-DE
ENSMUSG00000039908	0.617475	1.60748	5.2577	0.0218499	0.0615926	Slc26a11	11	1	119355557	119381079	non-DE
ENSMUSG00000056724	0.617214	2.23678	4.17345	0.0410621	0.100177	Nbeal2	9	-1	110624789	110654161	non-DE
ENSMUSG00000050587	0.617101	0.0665572	2.16819	0.140892	0.253271	Lrrc4c	2	1	96318169	97631666	non-DE
ENSMUSG00000029403	0.616926	0.558624	2.85678	0.0909896	0.182994	Cdkl2	5	-1	92006074	92043883	non-DE
ENSMUSG00000031398	0.616917	4.51954	12.0249	0.000524955	0.00361407	Plxna3	X	1	74329066	74344689	non-DE
ENSMUSG00000014602	0.615497	4.47787	7.34268	0.00673363	0.0252307	Kif1a	1	-1	93015464	93101951	non-DE
ENSMUSG00000097183	0.61537	0.47588	4.04124	0.0444011	0.106328	Gm17501	3	1	145650312	145677580	non-DE
ENSMUSG00000038241	0.614849	5.3516	12.5234	0.000401888	0.00298218	Cep250	2	1	155956458	155998900	non-DE
ENSMUSG00000026469	0.614731	5.68338	17.8088	2.4425e-05	0.000397357	Xpr1	1	-1	155275701	155417415	non-DE
ENSMUSG00000103144	0.614683	0.252025	2.91129	0.0879615	0.178415	Pcdhga1	18	1	37661793	37841873	non-DE
ENSMUSG00000024483	0.614655	6.44875	22.5878	2.00754e-06	6.92322e-05	Ankhd1	18	1	36559987	36665917	non-DE
ENSMUSG00000090877	0.614569	0.17908	2.76776	0.0961805	0.190163	Hspa1b	17	-1	34956436	34959238	non-DE
ENSMUSG00000038349	0.614424	1.90084	7.80443	0.00521182	0.0206473	Plcl1	1	1	55405921	55754285	non-DE
ENSMUSG00000075376	0.614404	5.37648	15.9937	6.35537e-05	0.000789385	Rc3h2	2	-1	37370069	37422903	non-DE
ENSMUSG00000037533	0.614135	5.73654	27.251	1.78682e-07	1.19825e-05	Rapgef6	11	1	54522847	54699285	non-DE
ENSMUSG00000027624	0.614068	4.65635	12.1839	0.000482045	0.00338087	Epb41l1	2	1	156420909	156543214	non-DE
ENSMUSG00000050310	0.613687	5.18541	15.8433	6.88086e-05	0.000837284	Rictor	15	1	6708379	6800401	non-DE
ENSMUSG00000024795	0.613581	6.44531	18.4683	1.7275e-05	0.000311138	Kif20b	19	1	34922361	34975745	non-DE
ENSMUSG00000066477	0.613559	2.95863	7.49194	0.00619756	0.0237114	Gm16551	9	1	74847983	74860134	non-DE
ENSMUSG00000028076	0.613435	1.7797	6.24203	0.0124753	0.0401977	Cd1d1	3	-1	86995834	86999441	non-DE
ENSMUSG00000022044	0.613201	3.006	4.07457	0.0435333	0.10477	Stmn4	14	1	66344296	66361680	non-DE
ENSMUSG00000030806	0.612747	2.76199	7.23683	0.00714228	0.0264077	Stx1b	7	-1	127803900	127824549	non-DE
ENSMUSG00000030092	0.612716	0.114705	3.65687	0.0558386	0.12678	Cntn6	6	1	104492790	104863406	non-DE
ENSMUSG00000040661	0.612673	6.63956	20.4586	6.09336e-06	0.000150992	Rad54l2	9	-1	106688082	106789194	non-DE
ENSMUSG00000041977	0.6124	5.19182	11.2825	0.000782395	0.00489963	Arhgef11	3	1	87617559	87738034	non-DE
ENSMUSG00000062444	0.612339	3.20076	9.11111	0.00254062	0.0119127	Ap3b2	7	-1	81460399	81493925	non-DE
ENSMUSG00000045962	0.61207	7.76438	20.7649	5.19249e-06	0.000134236	Wnk1	6	-1	119923969	120038672	non-DE
ENSMUSG00000036062	0.611766	0.325084	2.47676	0.11554	0.218454	Phf24	4	1	42916660	42944752	non-DE
ENSMUSG00000107962	0.611704	0.728945	1.80927	0.178596	0.301971	Gm43980	6	1	49254851	49256462	non-DE
ENSMUSG00000102742	0.611656	1.42613	5.90076	0.0151344	0.0466274	Pcdhga11	18	1	37755731	37841873	non-DE
ENSMUSG00000052133	0.611561	4.59443	12.1884	0.000480867	0.00337577	Sema5b	16	1	35541145	35664732	non-DE
ENSMUSG00000032470	0.611544	3.53496	8.44753	0.0036554	0.0157531	Mras	9	-1	99385420	99437381	non-DE
ENSMUSG00000025241	0.611542	4.48722	11.2496	0.000796392	0.00496236	Fyco1	9	-1	123789500	123851899	non-DE
ENSMUSG00000070461	0.611487	0.858444	5.46974	0.0193485	0.0562419	9230112E08Rik	2	1	180983924	180987275	non-DE
ENSMUSG00000034154	0.611434	5.21101	19.0863	1.24937e-05	0.000242848	Ino80	2	-1	119373042	119477687	non-DE
ENSMUSG00000056493	0.611382	5.35983	22.3621	2.25792e-06	7.52656e-05	Foxk1	5	1	142401497	142462011	non-DE
ENSMUSG00000028528	0.611338	1.63975	5.41827	0.0199271	0.0574993	Dnajc6	4	1	101496648	101642799	non-DE
ENSMUSG00000100241	0.611315	1.04189	3.89797	0.0483446	0.11352	Slc18a3	14	-1	32462438	32464850	non-DE
ENSMUSG00000041417	0.610757	5.10695	12.397	0.000430014	0.00312277	Pik3r1	13	-1	101680563	101768217	non-DE
ENSMUSG00000027840	0.610537	2.27252	5.96073	0.014628	0.0454017	Wnt2b	3	-1	104945272	104961921	non-DE
ENSMUSG00000020859	0.610263	7.37841	16.8389	4.0691e-05	0.000575091	Spag9	11	1	93996091	94126085	non-DE
ENSMUSG00000052726	0.609829	0.22637	2.73559	0.0981353	0.193084	Kcnt2	1	1	140246158	140612067	non-DE
ENSMUSG00000027684	0.609744	5.78741	21.4151	3.69841e-06	0.000105036	Mecom	3	-1	29951296	30548008	non-DE
ENSMUSG00000078496	0.609739	1.27207	4.8823	0.0271335	0.0728182	Zfp982	4	1	147492417	147513486	non-DE
ENSMUSG00000041235	0.609339	7.04868	27.0023	2.03214e-07	1.32817e-05	Chd7	4	1	8690406	8867659	non-DE
ENSMUSG00000031028	0.608926	3.69118	8.59425	0.00337226	0.0148547	Tub	7	1	108950338	109034460	non-DE
ENSMUSG00000025207	0.608914	3.67553	7.94581	0.00481987	0.0194131	Sema4g	19	1	44989101	45003397	non-DE
ENSMUSG00000059742	0.608894	0.782055	4.58843	0.0321886	0.0831922	Kcnh7	2	-1	62693414	63184287	non-DE
ENSMUSG00000025473	0.608513	0.473901	1.97731	0.159674	0.277856	Adam8	7	-1	139978932	139992562	non-DE
ENSMUSG00000029461	0.608087	6.19162	20.3268	6.528e-06	0.000156327	Fam168a	7	1	100706635	100841656	non-DE
ENSMUSG00000097924	0.607574	0.469798	3.21621	0.0729124	0.154945	A730020E08Rik	6	-1	61172293	61180810	non-DE
ENSMUSG00000038095	0.607565	6.67832	16.9017	3.93668e-05	0.000560612	Sbno1	5	-1	124368702	124426001	non-DE
ENSMUSG00000042644	0.606765	3.13529	9.58857	0.00195793	0.0098077	Itpr3	17	1	27057304	27122223	non-DE
ENSMUSG00000043432	0.606351	0.829526	4.76993	0.028961	0.0767456	Leng9	7	-1	4147915	4150374	non-DE
ENSMUSG00000040596	0.605712	6.26048	14.5597	0.000135791	0.00135709	Pogk	1	-1	166384622	166409863	non-DE
ENSMUSG00000038271	0.60542	3.09685	9.13336	0.00250991	0.0117946	Iffo1	6	1	125145241	125161782	non-DE
ENSMUSG00000026648	0.605154	2.25819	5.09687	0.0239691	0.0661893	Dclre1c	2	1	3424131	3464130	non-DE
ENSMUSG00000005397	0.605103	6.68475	19.5821	9.63655e-06	0.000206633	Nid1	13	1	13437551	13512269	non-DE
ENSMUSG00000070733	0.604677	5.04311	11.4546	0.000713188	0.00455971	Fryl	5	-1	73019987	73256619	non-DE
ENSMUSG00000020716	0.60449	5.56455	14.8983	0.000113465	0.00120016	Nf1	11	1	79339693	79581612	non-DE
ENSMUSG00000002885	0.604317	2.59325	6.92787	0.00848629	0.0300057	Adgre5	8	-1	83723251	83741326	non-DE
ENSMUSG00000023403	0.604307	0.996451	3.20852	0.0732559	0.155521	Stk31	6	1	49395604	49469501	non-DE
ENSMUSG00000047497	0.604196	3.42326	6.95714	0.00834854	0.0296237	Adamts12	15	1	11064790	11349231	non-DE
ENSMUSG00000039117	0.604037	4.858	26.3224	2.88921e-07	1.70093e-05	Taf4	2	-1	179912152	179976646	non-DE
ENSMUSG00000050919	0.603944	1.64186	4.54356	0.0330428	0.0849745	Zfp366	13	1	99184823	99250656	non-DE
ENSMUSG00000027692	0.603718	4.24373	9.21626	0.00239875	0.0113968	Tnik	3	1	28263214	28675858	non-DE
ENSMUSG00000056413	0.603599	0.884146	3.64792	0.0561392	0.12727	Adap1	5	-1	139271876	139325622	non-DE
ENSMUSG00000036560	0.603535	1.3585	4.70825	0.0300182	0.0789181	Lgi4	7	1	31059342	31070935	non-DE
ENSMUSG00000041115	0.603429	2.01257	6.18328	0.0128963	0.0411994	Iqsec2	X	1	152144268	152225236	non-DE
ENSMUSG00000103367	0.60336	1.18554	4.50658	0.0337646	0.0864002	Gm38158	1	1	176835724	176836062	non-DE
ENSMUSG00000045095	0.603353	5.5094	14.2054	0.000163902	0.0015625	Magi1	6	-1	93675455	94283917	non-DE
ENSMUSG00000110393	0.603275	0.511977	2.64308	0.104002	0.201501	Gm36445	13	1	65241753	65250154	non-DE
ENSMUSG00000037826	0.602954	2.76912	7.25622	0.00706559	0.0261694	Ppm1k	6	-1	57506502	57535468	non-DE
ENSMUSG00000068154	0.602872	3.95977	7.69949	0.00552363	0.0216306	Insm1	2	1	146221921	146225020	non-DE
ENSMUSG00000039967	0.602813	6.5254	12.0947	0.000505648	0.0035021	Zfp292	4	-1	34803113	34882960	non-DE
ENSMUSG00000102344	0.602711	0.161747	3.13644	0.0765608	0.160713	9430053O09Rik	16	-1	77419251	77421820	non-DE
ENSMUSG00000045103	0.602423	3.8812	17.3462	3.11524e-05	0.000472879	Dmd	X	1	82948870	85206141	non-DE
ENSMUSG00000032875	0.601771	6.43373	21.7409	3.12068e-06	9.41671e-05	Arhgef17	7	-1	100869752	100932107	non-DE
ENSMUSG00000069833	0.601745	5.49302	5.29657	0.0213675	0.0606269	Ahnak	19	1	8989284	9076919	non-DE
ENSMUSG00000040389	0.601338	4.11443	11.2714	0.000787112	0.00492093	Wdr47	3	1	108591279	108645719	non-DE
ENSMUSG00000006005	0.601156	7.85845	22.5924	2.00276e-06	6.92271e-05	Tpr	1	1	150392838	150449935	non-DE
ENSMUSG00000027215	0.601122	2.80548	2.21739	0.136464	0.24724	Cd82	2	-1	93419111	93463140	non-DE
ENSMUSG00000108852	0.600685	0.250696	3.81659	0.0507475	0.117758	Gm44911	8	1	7040157	7041218	non-DE
ENSMUSG00000053007	0.600579	1.84716	4.4936	0.034022	0.0868658	Creb5	6	1	53287270	53700376	non-DE
ENSMUSG00000020218	0.600162	1.2023	3.54053	0.0598862	0.133659	Wif1	10	1	121033960	121100650	non-DE
ENSMUSG00000043621	0.599258	0.839476	5.14259	0.0233458	0.064911	Ubxn10	4	-1	138709837	138737167	non-DE
ENSMUSG00000057637	0.599249	6.19485	23.3168	1.37396e-06	5.35522e-05	Prdm2	4	-1	143107391	143212995	non-DE
ENSMUSG00000039913	0.599196	1.25491	3.91385	0.0478897	0.112703	Pak7	2	-1	136081104	136387967	non-DE
ENSMUSG00000035284	0.599114	4.50953	10.2904	0.00133721	0.00739856	Vps13c	9	1	67840396	67995638	non-DE
ENSMUSG00000048118	0.598734	4.33045	10.4141	0.0012506	0.0070104	Arid4a	12	1	71015990	71098592	non-DE
ENSMUSG00000003228	0.598657	4.02852	20.193	7.00088e-06	0.000162705	Grk5	19	1	60889749	61092553	non-DE
ENSMUSG00000025584	0.598033	2.55271	3.8788	0.0488996	0.114517	Pde8a	7	1	81213596	81334533	non-DE
ENSMUSG00000068966	0.597903	4.7336	20.0355	7.60163e-06	0.000174887	Zbtb34	2	-1	33406108	33431324	non-DE
ENSMUSG00000026235	0.59784	5.86217	11.9756	0.000539013	0.0036742	Epha4	1	-1	77367185	77515088	non-DE
ENSMUSG00000022802	0.597723	3.36092	5.51416	0.0188632	0.0551416	Lmln	16	1	33062521	33127695	non-DE
ENSMUSG00000040021	0.597418	5.48964	16.1413	5.87881e-05	0.000745662	Lats1	10	1	7681214	7716460	non-DE
ENSMUSG00000044447	0.596967	4.20684	9.56512	0.00198309	0.00989695	Dock5	14	-1	67752135	67933442	non-DE
ENSMUSG00000062115	0.596922	5.96408	13.7198	0.000212209	0.00187162	Rai1	11	1	60105013	60199197	non-DE
ENSMUSG00000036452	0.596912	2.51295	5.09622	0.0239781	0.0661896	Arhgap26	18	1	38601534	39376284	non-DE
ENSMUSG00000046442	0.596823	3.7678	13.2493	0.000272684	0.00224245	Ppm1e	11	-1	87226906	87359023	non-DE
ENSMUSG00000098912	0.596708	1.88741	3.92915	0.047456	0.11196	1500004A13Rik	3	-1	88782943	88832547	non-DE
ENSMUSG00000029695	0.596195	2.18759	6.92598	0.00849523	0.0300232	Aass	6	-1	23072173	23132986	non-DE
ENSMUSG00000030525	0.595901	2.40132	6.19413	0.0128175	0.0409912	Chrna7	7	-1	63098692	63212569	non-DE
ENSMUSG00000073535	0.595704	0.284115	2.75938	0.0966856	0.190859	Gm5532	1	-1	155520173	155527143	non-DE
ENSMUSG00000019647	0.595226	4.62789	11.362	0.000749622	0.00473201	Sema6a	18	-1	47235598	47368870	non-DE
ENSMUSG00000006576	0.594842	3.32789	5.87458	0.015361	0.0471812	Slc4a3	1	1	75546266	75562172	non-DE
ENSMUSG00000034243	0.594838	5.83374	9.10621	0.00254744	0.0119372	Golgb1	16	1	36875140	36933085	non-DE
ENSMUSG00000013033	0.594788	5.71391	11.3502	0.000754406	0.00475419	Adgrl1	8	1	83900105	83941954	non-DE
ENSMUSG00000036097	0.594508	6.82658	22.5227	2.07677e-06	7.09659e-05	Slf2	19	1	44931119	44983787	non-DE
ENSMUSG00000079481	0.594231	5.06395	20.8296	5.02008e-06	0.000131025	Nhsl2	X	1	101849385	102092055	non-DE
ENSMUSG00000028736	0.593399	3.71779	13.8727	0.000195621	0.00177069	Pax7	4	-1	139737062	139833528	non-DE
ENSMUSG00000030306	0.593304	1.6526	3.70074	0.0543884	0.123996	Tmtc1	6	-1	148232430	148444389	non-DE
ENSMUSG00000055897	0.593238	3.79347	5.85247	0.0155552	0.0476005	Ppp4r1l-ps	2	-1	173579320	173659640	non-DE
ENSMUSG00000025927	0.593236	5.12614	22.3798	2.23717e-06	7.47796e-05	Tfap2b	1	1	19208914	19238576	non-DE
ENSMUSG00000026587	0.593049	3.79584	7.48384	0.00622551	0.023794	Astn1	1	1	158362273	158691781	non-DE
ENSMUSG00000022372	0.592901	1.10268	3.38265	0.0658861	0.143394	Sla	15	-1	66780819	66831829	non-DE
ENSMUSG00000030527	0.592817	3.82908	11.3172	0.000767923	0.0048292	Crtc3	7	-1	80586627	80688877	non-DE
ENSMUSG00000056531	0.59258	3.79225	7.1047	0.0076882	0.0278501	Ccdc18	5	1	108132875	108233628	non-DE
ENSMUSG00000042292	0.592483	4.73639	26.6834	2.39669e-07	1.48228e-05	Mkl1	15	-1	81012281	81190757	non-DE
ENSMUSG00000036273	0.592372	2.41508	5.4098	0.020024	0.0577309	Lrrk2	15	1	91673175	91816120	non-DE
ENSMUSG00000042529	0.592291	0.477168	3.05386	0.0805457	0.166878	Kcnj12	11	1	61022564	61071131	non-DE
ENSMUSG00000029406	0.591788	4.64817	14.633	0.000130606	0.00132528	Pitpnm2	5	-1	124118690	124249760	non-DE
ENSMUSG00000078716	0.591746	3.08096	6.40154	0.0114022	0.0376529	Tmem8b	4	1	43668971	43692668	non-DE
ENSMUSG00000043969	0.591727	3.75766	11.2129	0.000812297	0.00502697	Emx2	19	1	59458372	59465357	non-DE
ENSMUSG00000058006	0.591184	6.12053	21.7568	3.09495e-06	9.36752e-05	Mdn1	4	1	32657119	32775217	non-DE
ENSMUSG00000055421	0.59108	1.23586	2.9809	0.0842525	0.172339	Pcdh9	14	-1	93013410	93890679	non-DE
ENSMUSG00000063455	0.590921	5.38679	18.3507	1.8375e-05	0.000325403	D630045J12Rik	6	-1	38123174	38254009	non-DE
ENSMUSG00000038738	0.590815	1.84335	5.0083	0.0252261	0.0686346	Shank1	7	1	44310253	44360572	non-DE
ENSMUSG00000026072	0.590763	1.92422	4.91735	0.0265883	0.0716135	Il1r1	1	1	40225080	40317257	non-DE
ENSMUSG00000031906	0.590593	3.28921	8.23916	0.0040996	0.0171439	Smpd3	8	-1	106252548	106337988	non-DE
ENSMUSG00000023266	0.590444	2.05499	5.35599	0.0206512	0.059178	Frs3	17	1	47689030	47704286	non-DE
ENSMUSG00000010051	0.590293	0.982051	3.5208	0.0606031	0.134757	Hyal1	9	1	107576927	107581710	non-DE
ENSMUSG00000038679	0.590016	5.15696	9.20371	0.00241525	0.0114446	Trps1	15	-1	50654752	50890463	non-DE
ENSMUSG00000036698	0.590005	7.49979	21.3348	3.85668e-06	0.00010907	Ago2	15	-1	73095844	73184935	non-DE
ENSMUSG00000096401	0.589674	2.03005	5.24856	0.0219649	0.061853	Gm21811	8	1	20136502	20151665	non-DE
ENSMUSG00000023990	0.589622	1.71313	1.67132	0.196082	0.323711	Tfeb	17	1	47737030	47792419	non-DE
ENSMUSG00000052062	0.589147	3.308	8.46729	0.00361589	0.0156414	Pard3b	1	1	61638824	62642284	non-DE
ENSMUSG00000029651	0.589141	2.61779	7.48216	0.00623131	0.023804	Mtus2	5	1	147957320	148316065	non-DE
ENSMUSG00000024727	0.588724	0.701789	1.72272	0.189344	0.315369	Trpm6	19	1	18749983	18892510	non-DE
ENSMUSG00000097340	0.588652	2.23594	6.6919	0.00968518	0.0332244	Gm26617	X	1	94793103	94798237	non-DE
ENSMUSG00000027326	0.588111	5.93461	12.754	0.000355253	0.00271834	Knl1	2	1	119047119	119105501	non-DE
ENSMUSG00000028226	0.588047	3.72656	8.87743	0.00288718	0.0131955	Mmp16	4	1	17852893	18119145	non-DE
ENSMUSG00000041272	0.587883	3.44719	7.09607	0.00772532	0.027949	Tox	4	-1	6686353	6991557	non-DE
ENSMUSG00000026941	0.587764	1.69419	3.51805	0.0607038	0.13492	Mamdc4	2	-1	25563115	25574845	non-DE
ENSMUSG00000031342	0.58702	4.92183	6.90636	0.00858898	0.0302973	Gpm6b	X	1	166238911	166388988	non-DE
ENSMUSG00000052632	0.586686	5.39998	18.5702	1.63758e-05	0.000298647	Asap2	12	1	20990459	21270171	non-DE
ENSMUSG00000026204	0.586314	1.38138	5.06188	0.0244577	0.0671104	Ptprn	1	-1	75247027	75264502	non-DE
ENSMUSG00000030730	0.586177	1.52178	2.78473	0.0951665	0.188757	Atp2a1	7	-1	126445858	126463108	non-DE
ENSMUSG00000090115	0.586018	4.43361	15.2816	9.26137e-05	0.0010243	Usp49	17	1	47630690	47686738	non-DE
ENSMUSG00000037415	0.585983	4.97604	20.5648	5.76469e-06	0.000144765	Ranbp10	8	-1	105768308	105827350	non-DE
ENSMUSG00000019856	0.585714	2.60106	6.18539	0.0128809	0.0411589	Fam184a	10	-1	53633145	53751123	non-DE
ENSMUSG00000000804	0.585341	5.275	14.4484	0.000144053	0.00141565	Usp32	11	-1	84984442	85140161	non-DE
ENSMUSG00000026640	0.585308	6.32695	21.2717	3.98569e-06	0.000111531	Plxna2	1	1	194618218	194816869	non-DE
ENSMUSG00000041351	0.585304	2.20117	4.26651	0.0388706	0.0960185	Rap1gap	4	1	137664726	137729861	non-DE
ENSMUSG00000039501	0.585233	3.96802	11.9602	0.000543501	0.00369586	Znfx1	2	-1	167035793	167063015	non-DE
ENSMUSG00000047146	0.585187	4.81326	5.77477	0.0162578	0.0492274	Tet1	10	-1	62804570	62908996	non-DE
ENSMUSG00000047485	0.585181	1.10299	3.9024	0.0482171	0.113291	Klhl34	X	1	157818435	157820369	non-DE
ENSMUSG00000051586	0.585104	5.12985	13.5642	0.000230542	0.00198992	Mical3	6	-1	120931707	121130999	non-DE
ENSMUSG00000024299	0.584976	4.00926	7.47883	0.00624285	0.023842	Adamts10	17	1	33524204	33553782	non-DE
ENSMUSG00000062866	0.584731	5.71198	15.1567	9.89484e-05	0.00107863	Phactr2	10	-1	13207717	13474412	non-DE
ENSMUSG00000047036	0.584612	6.97735	17.1356	3.48043e-05	0.000513218	Zfp445	9	-1	122844529	122866006	non-DE
ENSMUSG00000037487	0.58412	7.68685	24.7032	6.68728e-07	3.08449e-05	Ubr5	15	-1	37967328	38078854	non-DE
ENSMUSG00000029298	0.584094	1.30175	4.92652	0.0264476	0.0713741	Gbp9	5	-1	105077630	105139539	non-DE
ENSMUSG00000042772	0.584069	6.44904	23.5298	1.22992e-06	4.9618e-05	Smg7	1	-1	152836995	152902646	non-DE
ENSMUSG00000020640	0.583889	4.97559	13.3885	0.000253169	0.00212995	Itsn2	12	1	4592638	4713962	non-DE
ENSMUSG00000040260	0.583866	4.93226	16.6048	4.60347e-05	0.000625796	Daam2	17	-1	49456022	49564343	non-DE
ENSMUSG00000038126	0.583618	4.82807	9.14752	0.00249056	0.011718	Mphosph9	5	-1	124250959	124327972	non-DE
ENSMUSG00000018263	0.583493	3.39723	7.6758	0.00559662	0.0218365	Tbx5	5	1	119832668	119885219	non-DE
ENSMUSG00000044288	0.583249	3.0364	9.40265	0.00216672	0.0105564	Cnr1	4	1	33924593	33948831	non-DE
ENSMUSG00000026475	0.582925	3.42638	10.3656	0.00128386	0.00714598	Rgs16	1	1	153740349	153745468	non-DE
ENSMUSG00000034480	0.582253	2.93418	4.98605	0.0255525	0.0693461	Diaph2	X	1	129749742	130465834	non-DE
ENSMUSG00000104346	0.581704	1.47725	4.4127	0.0356723	0.0899439	Pcdhga3	18	1	37674307	37841873	non-DE
ENSMUSG00000025261	0.581489	8.30636	13.1718	0.000284187	0.00231668	Huwe1	X	1	151800807	151935417	non-DE
ENSMUSG00000001588	0.58136	0.580787	4.31257	0.0378318	0.0939954	Acap1	11	-1	69881567	69895539	non-DE
ENSMUSG00000009569	0.581259	4.93674	14.223	0.000162371	0.00155185	Mkl2	16	1	13256481	13417529	non-DE
ENSMUSG00000022723	0.581256	4.1201	15.7813	7.11033e-05	0.000849324	Crybg3	16	-1	59490775	59600979	non-DE
ENSMUSG00000031592	0.581137	7.6135	15.722	7.33675e-05	0.000867371	Pcm1	8	1	41239752	41332344	non-DE
ENSMUSG00000030787	0.581071	0.880256	2.91043	0.0880086	0.178437	Lyve1	7	-1	110850607	110863239	non-DE
ENSMUSG00000049804	0.58059	6.97468	13.8571	0.000197248	0.00177844	Armcx4	X	1	134686519	134696757	non-DE
ENSMUSG00000039037	0.580551	2.41402	7.34403	0.00672858	0.0252307	St6galnac5	3	-1	152817081	152982246	non-DE
ENSMUSG00000026805	0.579961	1.55052	6.26698	0.0123009	0.039807	Barhl1	2	-1	28907679	28916668	non-DE
ENSMUSG00000064080	0.579957	5.04898	15.1695	9.8276e-05	0.00107296	Fbln2	6	1	91212455	91272540	non-DE
ENSMUSG00000020580	0.579792	6.51199	21.332	3.86229e-06	0.00010907	Rock2	12	1	16894895	16987823	non-DE
ENSMUSG00000033458	0.579718	3.3783	5.96477	0.0145945	0.0453657	Fan1	7	-1	64346758	64374095	non-DE
ENSMUSG00000022946	0.579677	2.79066	6.42394	0.0112592	0.037299	Dop1b	16	1	93711904	93810590	non-DE
ENSMUSG00000021379	0.579649	5.11259	8.3472	0.00386283	0.0163782	Id4	13	1	48261228	48266026	non-DE
ENSMUSG00000006307	0.579547	6.00207	14.5302	0.00013793	0.00137052	Kmt2b	7	-1	30568858	30588726	non-DE
ENSMUSG00000031825	0.578465	4.1058	14.0247	0.000180425	0.0016711	Crispld2	8	1	119992438	120052793	non-DE
ENSMUSG00000026480	0.578288	1.21953	3.90664	0.0480956	0.113041	Ncf2	1	1	152800194	152836991	non-DE
ENSMUSG00000039943	0.57802	3.29289	6.33391	0.0118451	0.0387762	Plcb4	2	1	135659011	136014593	non-DE
ENSMUSG00000035390	0.578001	3.74631	9.05189	0.00262424	0.0122092	Brsk1	7	1	4690604	4715997	non-DE
ENSMUSG00000041147	0.577652	5.57499	18.0354	2.16835e-05	0.000362917	Brca2	5	1	150522630	150570329	non-DE
ENSMUSG00000068735	0.577633	6.40197	15.5187	8.16935e-05	0.000932652	Trp53i11	2	1	93187548	93201759	non-DE
ENSMUSG00000036333	0.577535	5.86773	11.9503	0.000546379	0.00371205	Kidins220	12	1	24974925	25063152	non-DE
ENSMUSG00000034621	0.577372	6.16757	25.5812	4.2416e-07	2.23535e-05	Gpatch8	11	-1	102475915	102556392	non-DE
ENSMUSG00000039457	0.577312	3.43106	5.86598	0.0154363	0.0473238	Ppl	16	-1	5086291	5132421	non-DE
ENSMUSG00000099083	0.577306	4.35114	11.2551	0.000794044	0.00495599	Atf7	15	-1	102525946	102625464	non-DE
ENSMUSG00000049630	0.577061	0.22978	2.56192	0.109465	0.209564	C1ql3	2	-1	13003457	13011806	non-DE
ENSMUSG00000038602	0.577011	3.86136	10.563	0.00115374	0.00658332	Slc35f1	10	1	52690533	53111622	non-DE
ENSMUSG00000105741	0.576626	0.0630165	3.10526	0.0780395	0.162835	C79130	5	-1	29276002	29280297	non-DE
ENSMUSG00000075040	0.576576	3.84907	11.2138	0.000811913	0.00502697	Zfp408	2	-1	91643669	91649791	non-DE
ENSMUSG00000095139	0.576442	5.65936	14.214	0.000163149	0.0015573	Pou3f2	4	-1	22482780	22488366	non-DE
ENSMUSG00000022018	0.576442	2.18342	2.82391	0.0928697	0.185419	Rgcc	14	-1	79288756	79301645	non-DE
ENSMUSG00000024290	0.576383	6.34636	17.632	2.68035e-05	0.000426406	Rock1	18	-1	10064401	10182045	non-DE
ENSMUSG00000031788	0.576135	3.47202	11.0095	0.000906441	0.00547928	Kifc3	8	-1	95099828	95202812	non-DE
ENSMUSG00000032186	0.575507	5.07914	9.78746	0.00175706	0.00904021	Tmod2	9	-1	75565621	75611325	non-DE
ENSMUSG00000020682	0.575488	1.85355	3.15452	0.0757171	0.159479	Mmp28	11	-1	83440768	83463071	non-DE
ENSMUSG00000022139	0.575377	5.09953	14.127	0.000170872	0.00161191	Mbnl2	14	1	120275669	120431697	non-DE
ENSMUSG00000022636	0.575286	5.58507	17.5699	2.76943e-05	0.000436316	Alcam	16	-1	52248996	52454074	non-DE
ENSMUSG00000022231	0.575266	5.61251	12.8032	0.000346036	0.00266638	Sema5a	15	1	32244810	32696341	non-DE
ENSMUSG00000036568	0.575236	3.51269	9.85681	0.00169204	0.00878721	Bicral	17	-1	46798120	46858482	non-DE
ENSMUSG00000042766	0.574581	1.54684	2.53319	0.111475	0.212676	Trim46	3	-1	89234177	89246309	non-DE
ENSMUSG00000016763	0.574512	6.49637	14.2883	0.000156836	0.00151248	Scube1	15	-1	83604999	83725021	non-DE
ENSMUSG00000033316	0.574442	1.23068	3.62354	0.0569675	0.128602	Galnt9	5	1	110544355	110621380	non-DE
ENSMUSG00000004113	0.574281	2.45281	6.47648	0.0109311	0.0364541	Cacna1b	2	-1	24603887	24763152	non-DE
ENSMUSG00000058318	0.574275	5.53585	12.8738	0.000333209	0.00259612	Phf21a	2	1	92093117	92364666	non-DE
ENSMUSG00000032289	0.57427	4.43893	10.5049	0.00119058	0.00674698	Thsd4	9	-1	59966931	60522046	non-DE
ENSMUSG00000078185	0.574158	5.08266	19.6421	9.33874e-06	0.000202276	Chml	1	-1	175682237	175692901	non-DE
ENSMUSG00000011256	0.574117	5.50519	10.3508	0.00129417	0.00719264	Adam19	11	1	46055992	46147343	non-DE
ENSMUSG00000027797	0.574049	5.10256	11.2716	0.000787006	0.00492093	Dclk1	3	1	55242364	55539068	non-DE
ENSMUSG00000055296	0.573884	5.27527	9.05357	0.00262183	0.0122018	Tmem245	4	-1	56866923	56947437	non-DE
ENSMUSG00000047842	0.573196	1.05527	2.87192	0.0901374	0.181818	Diras2	13	-1	52504380	52531279	non-DE
ENSMUSG00000027678	0.572769	5.56228	21.4527	3.62671e-06	0.000103784	Ncoa3	2	1	165992636	166073242	non-DE
ENSMUSG00000052928	0.572672	4.37889	11.9753	0.00053909	0.0036742	Ctif	18	-1	75431224	75697696	non-DE
ENSMUSG00000071793	0.57263	2.32256	4.62996	0.0314183	0.0817095	2610005L07Rik	8	-1	20385782	20424814	non-DE
ENSMUSG00000006651	0.572597	4.44811	7.30188	0.00688826	0.0256681	Aplp1	7	-1	30434982	30445535	non-DE
ENSMUSG00000007653	0.572564	1.1665	3.57417	0.0586846	0.131592	Gabrb2	11	1	42419757	42629028	non-DE
ENSMUSG00000062627	0.572516	4.75534	14.3805	0.000149342	0.00145237	Mysm1	4	-1	94942040	94979100	non-DE
ENSMUSG00000019947	0.572514	3.99268	9.76316	0.00178044	0.00912596	Arid5b	10	-1	68092520	68278740	non-DE
ENSMUSG00000021217	0.572253	3.58906	12.8218	0.000342612	0.00264869	Tshz3	7	1	36698118	36773553	non-DE
ENSMUSG00000085156	0.572167	2.37984	2.65844	0.103001	0.200081	Snhg15	11	-1	6525591	6528760	non-DE
ENSMUSG00000039478	0.572117	2.6775	9.43256	0.00213166	0.01045	Micu3	8	1	40307458	40386308	non-DE
ENSMUSG00000036356	0.572076	1.46411	4.68981	0.0303421	0.0795603	Csgalnact1	8	-1	68356781	68735146	non-DE
ENSMUSG00000046463	0.57148	2.80364	5.15305	0.0232056	0.0645693	5930403N24Rik	10	1	37139402	37151315	non-DE
ENSMUSG00000049470	0.571326	7.25002	14.8567	0.000115998	0.00121579	Aff4	11	1	53350833	53421830	non-DE
ENSMUSG00000041895	0.571106	4.26262	10.5005	0.00119343	0.00675827	Wipi1	11	-1	109573331	109611967	non-DE
ENSMUSG00000038371	0.571041	6.21934	12.2455	0.000466384	0.00330821	Sbf2	7	-1	110308013	110614922	non-DE
ENSMUSG00000025369	0.570995	6.47381	21.6716	3.23544e-06	9.66418e-05	Smarcc2	10	1	128459248	128490482	non-DE
ENSMUSG00000027577	0.570827	3.98022	12.0097	0.000529247	0.00363027	Chrna4	2	-1	181018380	181043546	non-DE
ENSMUSG00000057230	0.570826	5.85761	16.9659	3.8058e-05	0.000549956	Aak1	6	1	86849517	87003223	non-DE
ENSMUSG00000068130	0.570751	3.50945	5.80931	0.0159416	0.0484954	Zfp442	2	-1	150407141	150451486	non-DE
ENSMUSG00000054008	0.570555	6.90842	19.155	1.20519e-05	0.000237704	Ndst1	18	-1	60685978	60713389	non-DE
ENSMUSG00000020333	0.570447	2.74206	8.42733	0.00369623	0.0158742	Acsl6	11	1	54303798	54364756	non-DE
ENSMUSG00000053141	0.570363	1.09736	3.8173	0.050726	0.117726	Ptprt	2	-1	161521990	162661147	non-DE
ENSMUSG00000034610	0.570303	7.29235	23.5977	1.18726e-06	4.82874e-05	Tut4	4	1	108459426	108559421	non-DE
ENSMUSG00000026812	0.570103	5.71259	16.832	4.08381e-05	0.000576626	Tsc1	2	1	28641228	28691167	non-DE
ENSMUSG00000062980	0.570071	4.33056	6.48821	0.0108592	0.0363152	Cped1	6	1	21985916	22256404	non-DE
ENSMUSG00000041308	0.570012	4.83218	18.4	1.79055e-05	0.000319799	Sntb2	8	1	106935750	107019714	non-DE
ENSMUSG00000029217	0.569696	2.04886	4.59176	0.032126	0.083088	Tec	5	-1	72755716	72868483	non-DE
ENSMUSG00000022801	0.56968	5.07396	10.6082	0.00112586	0.00645623	Lrch3	16	1	32914100	33015647	non-DE
ENSMUSG00000049807	0.569383	4.56658	14.0583	0.000177233	0.00165069	Arhgap23	11	1	97415533	97502402	non-DE
ENSMUSG00000022180	0.56927	1.27046	1.10179	0.293874	0.43484	Slc7a8	14	-1	54722209	54781946	non-DE
ENSMUSG00000023800	0.569256	3.04177	8.32075	0.00391947	0.0165714	Tiam2	17	1	3326573	3531344	non-DE
ENSMUSG00000041161	0.568643	2.73614	8.66291	0.00324753	0.0144445	Otud3	4	-1	138895379	138913945	non-DE
ENSMUSG00000021318	0.568418	6.83283	28.7986	8.031e-08	6.79096e-06	Gli3	13	1	15463235	15730026	non-DE
ENSMUSG00000031613	0.568315	2.52584	4.61568	0.0316809	0.0821393	Hpgd	8	1	56294585	56321043	non-DE
ENSMUSG00000030084	0.567949	6.95235	24.7796	6.42731e-07	3.02508e-05	Plxna1	6	-1	89316314	89362620	non-DE
ENSMUSG00000087153	0.567897	2.35517	5.20876	0.0224733	0.0629767	Gm6483	8	1	19682449	19697736	non-DE
ENSMUSG00000002413	0.567819	5.30772	14.4176	0.000146429	0.00142953	Braf	6	-1	39603237	39725463	non-DE
ENSMUSG00000042185	0.567681	4.71527	19.759	8.78456e-06	0.000194233	Nfrkb	9	1	31386192	31421333	non-DE
ENSMUSG00000093579	0.56766	0.433258	3.09088	0.0787324	0.16387	Gm20036	12	1	101913240	101915335	non-DE
ENSMUSG00000040118	0.567453	4.21348	7.94961	0.00480978	0.0193829	Cacna2d1	5	1	15934691	16374511	non-DE
ENSMUSG00000040721	0.567399	3.11383	5.72731	0.0167031	0.0503312	Zfhx2	14	-1	55060262	55092324	non-DE
ENSMUSG00000040537	0.567334	2.80781	5.05197	0.0245979	0.0674156	Adam22	5	-1	8072352	8368160	non-DE
ENSMUSG00000048349	0.56617	3.46958	7.04265	0.00795911	0.0286218	Pou4f1	14	-1	104461676	104467999	non-DE
ENSMUSG00000039813	0.566126	1.74918	3.09976	0.0783039	0.163205	Tbc1d2	4	-1	46604390	46650209	non-DE
ENSMUSG00000113836	0.565994	3.36831	11.1308	0.000849037	0.00520374	Gm3325	13	1	62015605	62050986	non-DE
ENSMUSG00000026605	0.565851	7.34835	14.8168	0.000118476	0.00123398	Cenpf	1	-1	189640606	189688086	non-DE
ENSMUSG00000066113	0.56583	1.76259	3.21446	0.0729901	0.155066	Adamtsl1	4	1	85514172	86428385	non-DE
ENSMUSG00000037754	0.56573	3.15146	8.82067	0.00297837	0.0135534	Ppp1r16b	2	1	158665398	158766334	non-DE
ENSMUSG00000038146	0.565512	6.73663	18.0922	2.10464e-05	0.000356741	Notch3	17	-1	32120820	32166880	non-DE
ENSMUSG00000074158	0.565257	3.17675	8.00398	0.00466747	0.0189574	Zfp976	7	-1	42609526	42642588	non-DE
ENSMUSG00000035246	0.565235	3.14614	5.26563	0.0217506	0.0614404	Pcyt1b	X	1	93654863	93749951	non-DE
ENSMUSG00000024073	0.564887	6.64345	12.88	0.000332106	0.00259157	Birc6	17	1	74528295	74703356	non-DE
ENSMUSG00000078349	0.564785	2.05829	4.45279	0.0348443	0.0883624	AW011738	4	1	156203304	156205151	non-DE
ENSMUSG00000089682	0.564674	3.90654	7.36176	0.00666257	0.0250485	Bcl2l2	14	1	54883377	54888234	non-DE
ENSMUSG00000007888	0.564666	2.80905	2.47735	0.115497	0.218454	Crlf1	8	1	70493158	70504081	non-DE
ENSMUSG00000020656	0.56459	0.437287	3.13382	0.076684	0.160949	Grhl1	12	1	24572283	24617391	non-DE
ENSMUSG00000025212	0.564074	2.32428	6.64883	0.00992212	0.0338587	Sfxn3	19	1	45047576	45056383	non-DE
ENSMUSG00000063952	0.563704	5.3236	23.3688	1.33728e-06	5.27959e-05	Brpf3	17	1	28801090	28839949	non-DE
ENSMUSG00000025422	0.563467	1.52427	3.76862	0.0522227	0.120453	Agap2	10	1	127075284	127093169	non-DE
ENSMUSG00000026188	0.563359	1.59576	3.46476	0.0626897	0.138132	Tmem169	1	1	72284369	72303104	non-DE
ENSMUSG00000004677	0.563201	6.03744	20.5967	5.66935e-06	0.000143819	Myo9b	8	1	71272714	71360713	non-DE
ENSMUSG00000039936	0.562996	3.18759	5.42482	0.0198525	0.0573555	Pik3cd	4	-1	149649168	149702571	non-DE
ENSMUSG00000038256	0.562985	6.32047	29.7017	5.03903e-08	4.74334e-06	Bcl9	3	-1	97203662	97297917	non-DE
ENSMUSG00000002007	0.562713	0.537414	3.06271	0.0801079	0.166155	Srpk3	X	1	73774405	73778925	non-DE
ENSMUSG00000029994	0.562659	2.9568	1.35711	0.244038	0.380541	Anxa4	6	-1	86736840	86793584	non-DE
ENSMUSG00000110945	0.562615	0.200569	2.80793	0.0937994	0.186749	Gm9856	9	-1	123018995	123021572	non-DE
ENSMUSG00000092083	0.562518	0.88972	3.62655	0.0568645	0.128428	Kcnb2	1	1	15287254	15723750	non-DE
ENSMUSG00000053477	0.562348	6.79281	14.4965	0.000140424	0.00139095	Tcf4	18	1	69343356	69689079	non-DE
ENSMUSG00000102504	0.56224	0.48265	2.97087	0.0847763	0.17315	Gm21955	4	1	42714926	42719893	non-DE
ENSMUSG00000049420	0.562224	1.70489	3.80943	0.0509647	0.118138	Tmem200a	10	-1	25912331	26079052	non-DE
ENSMUSG00000012123	0.561993	0.349099	1.61152	0.204279	0.333709	Crybg2	4	1	134060815	134092504	non-DE
ENSMUSG00000064262	0.56195	0.824234	3.23024	0.0722901	0.153907	Gimap8	6	1	48647234	48660875	non-DE
ENSMUSG00000000266	0.561761	3.53004	12.0133	0.00052821	0.00362481	Mid2	X	1	140664599	140767715	non-DE
ENSMUSG00000036403	0.561743	5.38494	15.1835	9.75526e-05	0.00106808	Cep135	5	1	76588698	76646466	non-DE
ENSMUSG00000006488	0.561725	1.2679	0.69196	0.405498	0.544069	Prl7a1	13	-1	27633366	27642493	non-DE
ENSMUSG00000021488	0.561637	7.78722	17.1406	3.47118e-05	0.000512358	Nsd1	13	1	55209782	55318325	non-DE
ENSMUSG00000029249	0.561577	6.11329	17.2991	3.1933e-05	0.000482282	Rest	5	1	77265491	77286432	non-DE
ENSMUSG00000103677	0.561369	0.845447	3.65273	0.0559773	0.126941	Pcdhga4	18	1	37685210	37841873	non-DE
ENSMUSG00000042129	0.561319	4.51032	8.41281	0.00372586	0.0159922	Rassf4	6	-1	116633008	116673952	non-DE
ENSMUSG00000033174	0.561271	2.24029	2.76081	0.0965994	0.190739	Mgll	6	1	88724412	88828360	non-DE
ENSMUSG00000092035	0.561187	9.72038	11.4707	0.000707034	0.00453004	Peg10	6	1	4747306	4760517	non-DE
ENSMUSG00000051735	0.560652	1.057	3.63212	0.0566747	0.128135	Rinl	7	1	28788969	28798963	non-DE
ENSMUSG00000021815	0.560477	0.696291	3.92713	0.047513	0.112044	Mss51	14	-1	20482867	20496901	non-DE
ENSMUSG00000043230	0.560473	0.0650213	1.89498	0.168641	0.289488	Fam124b	1	-1	80198706	80218473	non-DE
ENSMUSG00000053550	0.560462	0.908079	2.60328	0.106643	0.20565	Shisa7	7	-1	4825552	4844696	non-DE
ENSMUSG00000026872	0.560456	5.88553	13.6686	0.000218076	0.00190763	Zeb2	2	-1	44983632	45117395	non-DE
ENSMUSG00000008200	0.560377	5.92734	16.3974	5.13548e-05	0.0006796	Fnbp4	2	1	90745370	90781021	non-DE
ENSMUSG00000046230	0.560104	4.66664	13.8096	0.000202296	0.00180313	Vps13a	19	-1	16615366	16780933	non-DE
ENSMUSG00000015305	0.559966	5.27613	12.6321	0.000379188	0.00285533	Sash1	10	-1	8722219	8886070	non-DE
ENSMUSG00000027347	0.559963	0.630345	1.55037	0.213082	0.34403	Rasgrp1	2	-1	117279993	117343001	non-DE
ENSMUSG00000056427	0.559763	4.77835	18.0338	2.17018e-05	0.000362917	Slit3	11	1	35121224	35708507	non-DE
ENSMUSG00000014039	0.559506	4.32985	15.021	0.000106319	0.00114377	Prdm15	16	-1	97791467	97851850	non-DE
ENSMUSG00000053617	0.559488	6.38755	12.5259	0.000401341	0.0029796	Sh3pxd2a	19	-1	47260174	47464411	non-DE
ENSMUSG00000027580	0.559332	2.48587	6.60296	0.0101809	0.0345763	Helz2	2	-1	181227615	181242027	non-DE
ENSMUSG00000055891	0.55912	0.0823916	2.64637	0.103787	0.201163	Ubl4b	3	-1	107553687	107555073	non-DE
ENSMUSG00000023026	0.558954	5.60006	18.0363	2.16731e-05	0.000362917	Dip2b	15	1	100038664	100219473	non-DE
ENSMUSG00000047193	0.558703	4.71893	5.33094	0.0209501	0.0597825	Dync2h1	9	-1	6928503	7184446	non-DE
ENSMUSG00000034818	0.558605	0.764665	2.89847	0.0886635	0.179574	Celf5	10	-1	81459227	81482709	non-DE
ENSMUSG00000024268	0.558405	2.60995	5.03936	0.0247776	0.0677509	Celf4	18	-1	25477632	25754157	non-DE
ENSMUSG00000082179	0.558383	2.81455	2.06636	0.150581	0.265458	Gm11407	4	1	80002331	80003388	non-DE
ENSMUSG00000040712	0.558292	3.21554	8.77809	0.00304871	0.013774	Camta2	11	-1	70669463	70688105	non-DE
ENSMUSG00000095123	0.55822	0.807945	1.27504	0.258824	0.397083	Gm21781	10	1	4391587	4396424	non-DE
ENSMUSG00000019817	0.55818	7.22954	14.833	0.000117463	0.00122599	Plagl1	10	1	13060504	13131694	non-DE
ENSMUSG00000086370	0.558067	2.31167	3.34353	0.0674696	0.14598	Ftx	X	-1	103560907	103623754	non-DE
ENSMUSG00000063446	0.558066	1.34879	3.02256	0.0821139	0.169074	Plppr1	4	1	49059273	49340259	non-DE
ENSMUSG00000104814	0.558065	-0.0377755	1.67374	0.195758	0.323283	Gm42979	5	1	129556147	129558374	non-DE
ENSMUSG00000074852	0.557746	0.395171	2.00065	0.157231	0.274531	Hpse2	19	-1	42788947	43388311	non-DE
ENSMUSG00000060240	0.557383	1.70747	3.05801	0.0803398	0.166498	Cend1	7	-1	141426446	141429491	non-DE
ENSMUSG00000035045	0.556935	2.43004	6.97532	0.00826412	0.0294156	Zc3h12b	X	1	95711678	95932637	non-DE
ENSMUSG00000021009	0.556677	3.7918	13.2261	0.000276076	0.00226413	Ptpn21	12	-1	98676741	98737405	non-DE
ENSMUSG00000017550	0.556641	6.0192	16.4977	4.87096e-05	0.00065209	Atad5	11	1	80089400	80135794	non-DE
ENSMUSG00000022565	0.556609	5.16807	9.4335	0.00213057	0.0104483	Plec	15	-1	76170974	76232574	non-DE
ENSMUSG00000030681	0.556553	2.73005	1.58395	0.208192	0.338403	Mvp	7	-1	126986860	127014621	non-DE
ENSMUSG00000039904	0.556129	1.31426	3.12949	0.0768878	0.161106	Gpr37	6	-1	25665878	25690729	non-DE
ENSMUSG00000007880	0.555444	7.53275	25.092	5.46598e-07	2.68311e-05	Arid1a	4	-1	133679008	133756769	non-DE
ENSMUSG00000026620	0.555349	4.74305	17.2196	3.32989e-05	0.000496893	Mark1	1	-1	184896789	184999570	non-DE
ENSMUSG00000046179	0.554972	4.72646	21.2157	4.10397e-06	0.000114171	E2f8	7	-1	48866429	48881596	non-DE
ENSMUSG00000056211	0.55484	6.07911	17.9971	2.2124e-05	0.000368332	R3hdm1	1	1	128103301	128237736	non-DE
ENSMUSG00000068323	0.55465	1.11099	4.4577	0.0347443	0.0881834	Slc4a5	6	1	83219828	83304945	non-DE
ENSMUSG00000085562	0.554543	0.87922	4.29668	0.0381868	0.0946731	2610028E06Rik	4	-1	125887851	125922417	non-DE
ENSMUSG00000034701	0.554382	3.48263	10.7351	0.00105121	0.00612195	Neurod1	2	-1	79452521	79456751	non-DE
ENSMUSG00000037234	0.554371	6.03766	13.0595	0.000301746	0.00241381	Hook3	8	-1	26021421	26119224	non-DE
ENSMUSG00000031314	0.554145	6.48281	16.9915	3.75475e-05	0.000544122	Taf1	X	1	101532734	101601789	non-DE
ENSMUSG00000042401	0.554054	2.35317	3.11028	0.0777996	0.162561	Crtac1	19	-1	42283037	42431783	non-DE
ENSMUSG00000026074	0.55379	8.4336	23.3764	1.33203e-06	5.2742e-05	Map4k4	1	1	39900913	40026310	non-DE
ENSMUSG00000073016	0.55361	2.31607	3.069	0.0797985	0.165559	Uprt	X	1	104482818	104507490	non-DE
ENSMUSG00000025409	0.553535	4.87994	12.5661	0.000392816	0.00293377	Mbd6	10	-1	127281956	127289018	non-DE
ENSMUSG00000044730	0.5531	3.60334	10.1492	0.00144368	0.00783448	9930104L06Rik	4	1	124937048	124944656	non-DE
ENSMUSG00000024477	0.55302	4.78793	10.9525	0.000934797	0.00559197	Pggt1b	18	-1	46239949	46280850	non-DE
ENSMUSG00000032220	0.553008	4.10538	16.9144	3.91045e-05	0.000559539	Myo1e	9	1	70207350	70399766	non-DE
ENSMUSG00000063077	0.552967	7.43676	19.3731	1.07508e-05	0.000222248	Kif1b	4	-1	149176319	149307693	non-DE
ENSMUSG00000018774	0.552866	0.565388	1.63879	0.200492	0.329093	Cd68	11	-1	69664213	69666153	non-DE
ENSMUSG00000002107	0.552624	5.69473	12.9107	0.000326706	0.00255877	Celf2	2	-1	6539694	7509563	non-DE
ENSMUSG00000054752	0.552504	4.97837	10.6647	0.001092	0.0063153	Fsd1l	4	1	53631471	53707009	non-DE
ENSMUSG00000001632	0.552137	5.48001	23.2377	1.43161e-06	5.45682e-05	Brpf1	6	1	113307137	113324860	non-DE
ENSMUSG00000034156	0.551978	1.382	2.84702	0.0915434	0.183836	Tspoap1	11	1	87760541	87785928	non-DE
ENSMUSG00000042671	0.551779	3.26649	6.11996	0.0133664	0.0423576	Rgs8	1	1	153653025	153700323	non-DE
ENSMUSG00000020422	0.551482	6.57506	23.6862	1.13393e-06	4.67587e-05	Tns3	11	-1	8431652	8664535	non-DE
ENSMUSG00000108601	0.551415	0.140073	1.69487	0.19296	0.319614	Gm44645	7	1	73422250	73423902	non-DE
ENSMUSG00000020926	0.551383	3.52814	5.65806	0.0173753	0.0518247	Adam11	11	1	102761439	102780262	non-DE
ENSMUSG00000025375	0.551357	1.47434	4.62322	0.031542	0.0818984	Aatk	11	-1	120007313	120047167	non-DE
ENSMUSG00000040690	0.551192	2.89488	3.81002	0.0509469	0.118138	Col16a1	4	1	130047840	130099283	non-DE
ENSMUSG00000055692	0.551185	0.141961	2.48174	0.115175	0.217965	Tmem191c	16	1	17276077	17283229	non-DE
ENSMUSG00000029647	0.550548	4.98378	8.66742	0.0032395	0.0144302	Pan3	5	1	147430161	147548502	non-DE
ENSMUSG00000054728	0.550211	3.72183	9.20356	0.00241545	0.0114446	Phactr1	13	1	42680623	43138526	non-DE
ENSMUSG00000020486	0.550086	2.15818	1.27828	0.258219	0.396345	Sept4	11	1	87568903	87590539	non-DE
ENSMUSG00000048096	0.549934	1.36723	5.53234	0.0186681	0.0547211	Lmod1	1	1	135324807	135368065	non-DE
ENSMUSG00000113964	0.549913	-0.101712	1.7424	0.186835	0.312338	Gm48667	12	1	20196916	20197054	non-DE
ENSMUSG00000066306	0.549392	7.79567	26.7831	2.27618e-07	1.42542e-05	Numa1	7	1	101934111	102014964	non-DE
ENSMUSG00000040209	0.549319	5.57703	14.8428	0.000116851	0.00122157	Zfp704	3	-1	9427020	9610085	non-DE
ENSMUSG00000046111	0.549161	5.41284	12.4614	0.000415459	0.00304813	Cep295	9	-1	15316915	15357788	non-DE
ENSMUSG00000020812	0.54911	2.1037	5.78055	0.0162044	0.0491253	1810032O08Rik	11	1	116671660	116675799	non-DE
ENSMUSG00000053198	0.548748	3.23315	10.5419	0.00116701	0.00664383	Prx	7	1	27499324	27520214	non-DE
ENSMUSG00000034462	0.548664	5.75695	13.0943	0.000296189	0.00238593	Pkd2	5	1	104459450	104505819	non-DE
ENSMUSG00000091735	0.54861	0.256786	2.40854	0.120675	0.225796	Gpr62	9	-1	106463962	106465938	non-DE
ENSMUSG00000049092	0.548535	0.926468	3.56561	0.0589881	0.132147	Gpr137c	14	1	45219717	45282725	non-DE
ENSMUSG00000020019	0.548284	2.64227	3.23172	0.0722246	0.1538	Ntn4	10	1	93640681	93747207	non-DE
ENSMUSG00000030424	0.54795	1.65544	4.23457	0.0396087	0.0973438	Zfp939	7	1	39449518	39477413	non-DE
ENSMUSG00000072915	0.547319	2.98729	5.78764	0.0161392	0.0490071	Gm12258	11	1	58847158	58861956	non-DE
ENSMUSG00000028086	0.547168	4.88914	20.39	6.31581e-06	0.000154459	Fbxw7	3	1	84815268	84979198	non-DE
ENSMUSG00000024052	0.547063	5.85152	17.5761	2.76039e-05	0.00043627	Lpin2	17	1	71182560	71249817	non-DE
ENSMUSG00000074652	0.547059	1.12602	2.31971	0.127744	0.235374	Myh7b	2	1	155611212	155634307	non-DE
ENSMUSG00000055320	0.546863	6.89831	19.0514	1.27244e-05	0.000246054	Tead1	7	1	112679318	112906807	non-DE
ENSMUSG00000020785	0.546763	2.24862	5.96164	0.0146205	0.0454017	Camkk1	11	1	73019008	73042073	non-DE
ENSMUSG00000085642	0.546732	0.128263	1.7351	0.18776	0.313476	3110053B16Rik	12	-1	20874125	20921262	non-DE
ENSMUSG00000032413	0.546615	4.47874	10.2036	0.00140163	0.00766747	Rasa2	9	-1	96539300	96631617	non-DE
ENSMUSG00000024462	0.546565	4.16742	4.31624	0.0377502	0.0938237	Gabbr1	17	1	37045966	37075067	non-DE
ENSMUSG00000079260	0.546323	2.6534	5.32678	0.0210002	0.0599028	Tmppe	9	1	114401105	114407276	non-DE
ENSMUSG00000022687	0.546299	5.25401	16.1874	5.73748e-05	0.000737739	Boc	16	-1	44485049	44558897	non-DE
ENSMUSG00000033882	0.546128	1.26365	1.79207	0.180674	0.304556	Rbm46	3	-1	82837228	82876483	non-DE
ENSMUSG00000026028	0.545911	5.38253	20.6302	5.57101e-06	0.000142289	Trak2	1	-1	58900449	58973430	non-DE
ENSMUSG00000086290	0.54591	3.12024	3.90664	0.0480957	0.113041	Snhg12	4	1	132308623	132311024	non-DE
ENSMUSG00000000374	0.545513	5.34094	19.1412	1.21394e-05	0.000238622	Trappc10	10	-1	78186725	78244641	non-DE
ENSMUSG00000085541	0.545506	0.308272	2.92048	0.0874617	0.177521	Gm16010	9	1	97015966	97022043	non-DE
ENSMUSG00000026586	0.545427	7.14837	15.3366	8.99581e-05	0.00100143	Prrx1	1	-1	163245119	163313710	non-DE
ENSMUSG00000021338	0.54516	4.09687	13.1385	0.000289289	0.00234042	Carmil1	13	-1	24012344	24280795	non-DE
ENSMUSG00000025318	0.545085	1.53587	4.40439	0.0358466	0.0903074	Jph3	8	1	121729623	121794276	non-DE
ENSMUSG00000068327	0.54476	1.7091	3.7068	0.0541912	0.123727	Tlx2	6	-1	83068324	83070293	non-DE
ENSMUSG00000026565	0.544719	5.86179	10.3922	0.00126547	0.00707518	Pou2f1	1	-1	165865154	166002678	non-DE
ENSMUSG00000052676	0.544585	2.81973	4.26108	0.0389952	0.0962719	Zmat1	X	-1	134971372	135009209	non-DE
ENSMUSG00000030737	0.544485	1.15626	2.09728	0.147561	0.262033	Slco2b1	7	-1	99657804	99711340	non-DE
ENSMUSG00000026918	0.544471	7.74048	40.6182	1.8507e-10	1.10798e-07	Brd3	2	-1	27445579	27507662	non-DE
ENSMUSG00000039385	0.544286	3.89966	8.06412	0.00451505	0.0184384	Cdh6	15	-1	13028701	13173675	non-DE
ENSMUSG00000035713	0.544228	1.94841	4.51396	0.0336193	0.0861168	Usp35	7	-1	97309380	97332020	non-DE
ENSMUSG00000043336	0.544204	4.25322	12.1057	0.000502684	0.00348737	Filip1l	16	1	57353093	57573126	non-DE
ENSMUSG00000030000	0.544105	4.77873	7.05691	0.00789602	0.0284222	Add2	6	1	86028681	86124409	non-DE
ENSMUSG00000044071	0.544063	1.629	4.29135	0.0383067	0.0949231	Fam19a2	10	1	123263996	123741204	non-DE
ENSMUSG00000083907	0.543911	0.476308	3.52704	0.0603754	0.134489	Plk-ps1	5	1	35554184	35555970	non-DE
ENSMUSG00000060657	0.54391	6.38195	14.7301	0.000124051	0.00127519	Marf1	16	-1	14109173	14163351	non-DE
ENSMUSG00000020275	0.54356	2.42254	8.06413	0.00451501	0.0184384	Rel	11	-1	23736847	23770970	non-DE
ENSMUSG00000052981	0.543497	2.3072	3.70231	0.0543372	0.123954	Ube2ql1	13	-1	69702832	69739889	non-DE
ENSMUSG00000021268	0.543358	5.20092	1.62029	0.203052	0.332176	Meg3	12	1	109541001	109571726	non-DE
ENSMUSG00000024308	0.543307	3.51459	3.10266	0.0781643	0.162959	Tapbp	17	1	33915899	33929292	non-DE
ENSMUSG00000026384	0.543173	5.42039	14.7741	0.000121186	0.00125435	Ptpn4	1	-1	119652467	119837613	non-DE
ENSMUSG00000051149	0.542736	1.32661	3.01073	0.082715	0.169984	Adnp	2	-1	168180986	168207112	non-DE
ENSMUSG00000056854	0.542712	4.29267	6.2807	0.012206	0.0396199	Pou3f4	X	1	110814280	110817207	non-DE
ENSMUSG00000000594	0.54269	4.11954	1.30235	0.253785	0.391408	Gm2a	11	1	55098115	55113029	non-DE
ENSMUSG00000025089	0.542633	4.21551	6.39229	0.0114617	0.0378023	Gfra1	19	-1	58235604	58455909	non-DE
ENSMUSG00000039835	0.542144	5.35535	15.0447	0.000104995	0.00113218	Nhsl1	10	1	18318985	18533892	non-DE
ENSMUSG00000003282	0.541778	3.83293	5.63713	0.017584	0.05227	Plag1	4	-1	3900996	3938423	non-DE
ENSMUSG00000040836	0.541512	5.28825	15.3266	9.04342e-05	0.00100485	Gpr161	1	1	165295789	165326745	non-DE
ENSMUSG00000031925	0.541498	3.57141	6.85279	0.00885029	0.0310249	Maml2	9	1	13297957	13709388	non-DE
ENSMUSG00000021709	0.541385	7.31585	19.6471	9.31441e-06	0.000202042	Erbin	13	-1	103818787	103920514	non-DE
ENSMUSG00000038384	0.541143	5.10955	11.5561	0.00067529	0.00437504	Setd1b	5	1	123142193	123168629	non-DE
ENSMUSG00000038481	0.541074	4.81032	10.5285	0.00117548	0.00668188	Cdk19	10	1	40339564	40483818	non-DE
ENSMUSG00000074743	0.541016	3.18713	5.65227	0.0174328	0.0519651	Thbd	2	-1	148404466	148408188	non-DE
ENSMUSG00000020340	0.54101	5.20711	13.2448	0.000273343	0.0022454	Cyfip2	11	-1	46193850	46312859	non-DE
ENSMUSG00000026825	0.540733	4.6608	16.9324	3.87345e-05	0.000555456	Dnm1	2	-1	32308471	32353338	non-DE
ENSMUSG00000033880	0.54066	1.09118	1.28883	0.256264	0.394154	Lgals3bp	11	-1	118392751	118402092	non-DE
ENSMUSG00000061451	0.540373	0.837337	3.93536	0.0472809	0.111617	Tmem151a	19	-1	5070859	5085531	non-DE
ENSMUSG00000026288	0.540091	2.015	5.01586	0.0251161	0.0683975	Inpp5d	1	1	87620312	87720507	non-DE
ENSMUSG00000062257	0.539955	0.652027	3.61102	0.0573981	0.12934	Opcml	9	1	27790775	28925410	non-DE
ENSMUSG00000035401	0.539898	5.88237	16.4313	5.04457e-05	0.000671129	Emsy	7	-1	98587137	98656783	non-DE
ENSMUSG00000017943	0.539734	2.48855	6.97971	0.00824388	0.0293987	Gdap1l1	2	1	163438476	163455324	non-DE
ENSMUSG00000042605	0.539696	5.52459	21.5125	3.51526e-06	0.000101179	Atxn2	5	1	121711337	121816493	non-DE
ENSMUSG00000080316	0.539138	2.23632	1.15485	0.282536	0.422219	Spaca6	17	1	17827158	17843009	non-DE
ENSMUSG00000045328	0.538919	6.94689	15.1973	9.68398e-05	0.00106339	Cenpe	3	1	135212537	135273611	non-DE
ENSMUSG00000034275	0.538901	3.85471	7.90743	0.00492322	0.0197921	Igsf9b	9	1	27299204	27357546	non-DE
ENSMUSG00000043241	0.53876	5.96526	21.9185	2.84481e-06	8.85204e-05	Upf2	2	1	5951469	6056703	non-DE
ENSMUSG00000030201	0.538718	6.7408	19.6199	9.44775e-06	0.000203767	Lrp6	6	-1	134446476	134566965	non-DE
ENSMUSG00000037926	0.538625	4.79055	13.1242	0.000291511	0.00235398	Ssh2	11	1	77216287	77460220	non-DE
ENSMUSG00000031659	0.538426	3.4425	3.3196	0.0684587	0.147491	Adcy7	8	1	88272403	88329962	non-DE
ENSMUSG00000040428	0.538386	0.575343	2.74786	0.0973848	0.191889	Plekha4	7	1	45526330	45554229	non-DE
ENSMUSG00000041849	0.538365	0.577073	2.30946	0.128589	0.236465	Card6	15	-1	5095981	5108539	non-DE
ENSMUSG00000038594	0.538352	4.24853	9.95307	0.00160581	0.0084449	Cep85l	10	-1	53273443	53379947	non-DE
ENSMUSG00000035735	0.538343	2.45301	6.79175	0.00915802	0.0317876	Dagla	19	-1	10245265	10304877	non-DE
ENSMUSG00000033904	0.53827	6.05069	15.8722	6.77684e-05	0.000827316	Ccp110	7	1	118712552	118737024	non-DE
ENSMUSG00000112117	0.538161	1.03121	3.91591	0.0478312	0.112614	Rmst	10	-1	92071037	92165170	non-DE
ENSMUSG00000097944	0.538064	0.0569896	1.56582	0.210816	0.341332	A130014A01Rik	8	1	120101582	120103904	non-DE
ENSMUSG00000040249	0.537544	6.32513	8.2946	0.00397631	0.0167697	Lrp1	10	-1	127538161	127621148	non-DE
ENSMUSG00000039891	0.537132	2.28041	5.75558	0.0164364	0.0496675	Txlnb	10	1	17796226	17845665	non-DE
ENSMUSG00000055639	0.537028	5.9198	14.6948	0.000126397	0.00129486	Dach1	14	-1	97786853	98169765	non-DE
ENSMUSG00000020261	0.537015	3.3792	7.22469	0.00719074	0.0265607	Slc36a1	11	1	55204350	55236330	non-DE
ENSMUSG00000024079	0.53684	3.93213	6.54333	0.0105278	0.0354647	Eif2ak2	17	-1	78852564	78882573	non-DE
ENSMUSG00000004562	0.536453	6.28138	15.9114	6.63779e-05	0.000815663	Arhgef40	14	1	51984719	52006251	non-DE
ENSMUSG00000041559	0.536074	2.3679	6.32062	0.0119342	0.0389998	Fmod	1	1	134037254	134048277	non-DE
ENSMUSG00000026058	0.535929	1.29593	2.95787	0.0854607	0.174358	Khdrbs2	1	1	32172714	32658568	non-DE
ENSMUSG00000049939	0.535802	3.69469	7.89737	0.00495067	0.019881	Lrrc4	6	-1	28661831	28831747	non-DE
ENSMUSG00000021614	0.535678	7.54488	11.5037	0.000694564	0.00446352	Vcan	13	-1	89655312	89742509	non-DE
ENSMUSG00000039841	0.535663	3.91987	10.042	0.00153012	0.00817614	Zfp800	6	-1	28239927	28398005	non-DE
ENSMUSG00000063663	0.53559	5.83313	12.8538	0.000336798	0.00261591	Brwd3	X	-1	108737016	108834372	non-DE
ENSMUSG00000025262	0.535566	2.57194	5.52317	0.0187662	0.0549225	Fam120c	X	1	151344175	151471842	non-DE
ENSMUSG00000041215	0.535184	6.7092	26.591	2.51419e-07	1.54221e-05	Yeats2	16	1	20141063	20232573	non-DE
ENSMUSG00000022515	0.534932	4.28377	10.5632	0.00115363	0.00658332	Anks3	16	-1	4941436	4964205	non-DE
ENSMUSG00000015709	0.534743	6.21187	14.0642	0.000176673	0.00164752	Arnt2	7	-1	84246278	84410176	non-DE
ENSMUSG00000087403	0.534502	2.71459	3.457	0.0629844	0.138508	Kantr	X	-1	152294828	152327495	non-DE
ENSMUSG00000015968	0.53446	1.51045	3.98252	0.0459746	0.109223	Cacna1d	14	-1	30039939	30491455	non-DE
ENSMUSG00000038534	0.534395	2.82324	7.4961	0.00618327	0.0236781	Osbpl7	11	1	97050628	97068904	non-DE
ENSMUSG00000005534	0.533634	4.95904	10.4522	0.00122506	0.00691271	Insr	8	-1	3122061	3279617	non-DE
ENSMUSG00000030409	0.53348	2.51524	3.28213	0.0700381	0.150159	Dmpk	7	1	19083849	19093821	non-DE
ENSMUSG00000025892	0.533154	2.26107	5.51206	0.0188858	0.0551754	Gria4	9	-1	4417896	4796234	non-DE
ENSMUSG00000014503	0.53311	2.47081	4.24058	0.0394687	0.0970793	Pkd2l2	18	1	34409423	34442789	non-DE
ENSMUSG00000042423	0.533017	4.82171	19.35	1.08818e-05	0.000223106	Fbrs	7	1	127479199	127491711	non-DE
ENSMUSG00000048279	0.532862	5.01666	7.20414	0.00727355	0.0267552	Sacs	14	1	61138457	61240695	non-DE
ENSMUSG00000074415	0.532372	2.73759	1.92808	0.164969	0.284785	3110039I08Rik	9	1	41327077	41716994	non-DE
ENSMUSG00000025964	0.532327	2.59456	5.87326	0.0153725	0.0472057	Adam23	1	1	63445891	63596276	non-DE
ENSMUSG00000021182	0.532228	4.86021	14.6383	0.00013024	0.00132272	Ccdc88c	12	-1	100911523	101029056	non-DE
ENSMUSG00000097141	0.532156	0.375064	2.87362	0.0900421	0.18165	Gm10524	18	1	82692284	82694176	non-DE
ENSMUSG00000085917	0.531973	0.702657	2.81014	0.0936701	0.18663	Gm15899	8	-1	122683602	122683839	non-DE
ENSMUSG00000020431	0.531899	3.97472	13.451	0.000244875	0.00207991	Adcy1	11	1	7063489	7178506	non-DE
ENSMUSG00000074305	0.531761	4.29724	12.7049	0.000364701	0.00277644	Peak1	9	-1	56201126	56418067	non-DE
ENSMUSG00000026743	0.531614	6.07066	13.8673	0.000196182	0.00177203	Mllt10	2	1	18055237	18212388	non-DE
ENSMUSG00000041037	0.531489	4.95376	11.9792	0.000537973	0.00367124	Irgq	7	1	24530689	24538600	non-DE
ENSMUSG00000028111	0.53139	1.20293	3.83948	0.050059	0.116521	Ctsk	3	1	95499256	95509362	non-DE
ENSMUSG00000028354	0.531282	4.07219	6.48275	0.0108926	0.0363911	Fmn2	1	1	174501825	174822729	non-DE
ENSMUSG00000022623	0.53128	3.48148	6.8166	0.00903145	0.0314726	Shank3	15	1	89499623	89560261	non-DE
ENSMUSG00000034235	0.53121	5.26868	17.5227	2.83904e-05	0.000444476	Usp54	14	-1	20548912	20641063	non-DE
ENSMUSG00000031529	0.531161	6.73809	13.9679	0.000185962	0.00170964	Tnks	8	-1	34826460	34965690	non-DE
ENSMUSG00000020776	0.531037	5.59646	11.8139	0.000587891	0.00395104	Fbf1	11	-1	116142285	116168166	non-DE
ENSMUSG00000018849	0.530873	5.09351	16.3354	5.30638e-05	0.000695169	Wwc1	11	-1	35838400	35980527	non-DE
ENSMUSG00000039218	0.530764	7.98061	14.9271	0.000111744	0.00118615	Srrm2	17	1	23790532	23824741	non-DE
ENSMUSG00000025766	0.530078	3.67993	9.52047	0.00203193	0.0100716	D3Ertd751e	3	1	41742611	41803320	non-DE
ENSMUSG00000026004	0.529562	3.78561	8.37142	0.00381167	0.016258	Kansl1l	1	-1	66719248	66817562	non-DE
ENSMUSG00000031748	0.529329	4.25444	8.45643	0.00363755	0.0157123	Gnao1	8	1	93809966	93969388	non-DE
ENSMUSG00000072919	0.529316	0.246455	2.85375	0.0911609	0.183314	Noxred1	12	-1	87221040	87238732	non-DE
ENSMUSG00000040152	0.529315	5.68027	15.4911	8.28961e-05	0.000943503	Thbs1	2	1	118111876	118127133	non-DE
ENSMUSG00000024534	0.529066	4.43261	12.526	0.000401323	0.0029796	Sncaip	18	1	52767709	52915935	non-DE
ENSMUSG00000025427	0.529039	5.05702	9.30481	0.00228553	0.0109957	Rnf165	18	-1	77456110	77565147	non-DE
ENSMUSG00000029009	0.528951	5.10637	18.0078	2.2e-05	0.000367083	Mthfr	4	1	148039077	148059551	non-DE
ENSMUSG00000024335	0.52881	8.1856	21.5594	3.43035e-06	9.96933e-05	Brd2	17	-1	34112023	34122634	non-DE
ENSMUSG00000025983	0.528719	1.0913	3.2015	0.0735706	0.155987	Ccdc150	1	1	54250683	54368727	non-DE
ENSMUSG00000053754	0.528704	6.80402	31.7627	1.74202e-08	2.11084e-06	Chd8	14	-1	52198151	52257780	non-DE
ENSMUSG00000041245	0.528477	5.13432	8.53494	0.00348392	0.0152245	Wnk3	X	1	151198078	151320152	non-DE
ENSMUSG00000048938	0.528441	0.344399	0.962852	0.326469	0.468033	Nr1h5	3	-1	102939658	102964133	non-DE
ENSMUSG00000063564	0.528425	5.70053	13.8839	0.00019446	0.00176705	Col23a1	11	1	51289920	51583918	non-DE
ENSMUSG00000084128	0.528284	2.35098	2.84296	0.0917748	0.184078	Esrp2	8	-1	106130319	106136974	non-DE
ENSMUSG00000037098	0.528065	5.75584	20.9681	4.67005e-06	0.000124815	Rab11fip3	17	-1	25989036	26069409	non-DE
ENSMUSG00000052516	0.527989	5.0098	16.7939	4.1668e-05	0.000581705	Robo2	16	-1	73891839	74411825	non-DE
ENSMUSG00000052539	0.527819	5.07951	12.379	0.000434184	0.00314385	Magi3	3	-1	104013259	104220374	non-DE
ENSMUSG00000051786	0.52773	5.14069	16.1372	5.8914e-05	0.000745995	Tubgcp6	15	-1	89098357	89123112	non-DE
ENSMUSG00000015597	0.527665	5.58391	14.9766	0.000108851	0.00116786	Zfp318	17	1	46383731	46420920	non-DE
ENSMUSG00000021838	0.527618	4.26072	12.2735	0.000459439	0.00327693	Samd4	14	1	46882854	47105815	non-DE
ENSMUSG00000036769	0.527517	2.39633	6.97782	0.00825263	0.0294091	Wdr44	X	1	23693051	23806025	non-DE
ENSMUSG00000042202	0.527413	4.59241	12.6831	0.000368981	0.0027948	Slc35e2	4	1	155601416	155623340	non-DE
ENSMUSG00000023033	0.527365	2.83258	4.67858	0.030541	0.0799122	Scn8a	15	1	100869858	101045938	non-DE
ENSMUSG00000029714	0.527008	4.85639	5.05517	0.0245525	0.0673283	Gigyf1	5	1	137518548	137527935	non-DE
ENSMUSG00000105987	0.526862	5.76094	0.850101	0.356524	0.497538	AI506816	5	-1	23698296	23712667	non-DE
ENSMUSG00000001827	0.526819	1.56052	0.747501	0.387269	0.52748	Folr1	7	-1	101858331	101870788	non-DE
ENSMUSG00000053646	0.526656	6.49532	13.8577	0.000197189	0.00177844	Plxnb1	9	1	109095389	109119917	non-DE
ENSMUSG00000057093	0.52658	2.12729	5.43177	0.0197737	0.0571779	Zfp607b	7	1	27689340	27706484	non-DE
ENSMUSG00000029313	0.52653	4.51097	16.9977	3.74257e-05	0.000544122	Aff1	5	1	103692374	103855322	non-DE
ENSMUSG00000028073	0.52641	3.54501	7.61069	0.00580232	0.0224983	Pear1	3	-1	87747890	87824306	non-DE
ENSMUSG00000053158	0.526374	2.54093	4.50695	0.0337574	0.0863965	Fes	7	-1	80377756	80387946	non-DE
ENSMUSG00000044646	0.525542	1.016	1.72301	0.189306	0.315342	Zbtb7c	18	1	75820178	76148561	non-DE
ENSMUSG00000025221	0.525383	0.118403	2.09214	0.148059	0.262559	Kcnip2	19	-1	45791839	45816061	non-DE
ENSMUSG00000022812	0.525353	7.13019	15.5483	8.0423e-05	0.000923076	Gsk3b	16	1	38089001	38246084	non-DE
ENSMUSG00000030337	0.525245	0.689645	2.83623	0.0921604	0.184481	Vamp1	6	1	125215551	125245964	non-DE
ENSMUSG00000023284	0.525065	3.14346	5.97664	0.0144966	0.0451364	Zfp605	5	1	110110092	110129794	non-DE
ENSMUSG00000024193	0.52496	2.0831	3.65904	0.0557658	0.12673	Phf1	17	1	26933127	26937890	non-DE
ENSMUSG00000027217	0.524885	5.68724	16.1971	5.70818e-05	0.000734603	Tspan18	2	-1	93201760	93334505	non-DE
ENSMUSG00000044708	0.524647	0.435728	2.47696	0.115526	0.218454	Kcnj10	1	1	172341210	172374085	non-DE
ENSMUSG00000026380	0.524616	0.78807	3.1067	0.0779707	0.162737	Tfcp2l1	1	1	118627945	118685168	non-DE
ENSMUSG00000085327	0.5246	0.0858437	2.33176	0.126759	0.23426	Gm16104	10	1	81409575	81411579	non-DE
ENSMUSG00000062694	0.524438	0.12338	2.73157	0.0983827	0.193368	Cav3	6	1	112459505	112472872	non-DE
ENSMUSG00000042104	0.524245	4.25109	5.72833	0.0166933	0.050312	Uggt2	14	-1	118985039	119099430	non-DE
ENSMUSG00000046207	0.524104	0.75704	2.49557	0.114167	0.216644	Pik3r6	11	1	68503019	68552698	non-DE
ENSMUSG00000087408	0.523633	0.727878	2.54901	0.110364	0.211013	Cers1	8	1	70315775	70331592	non-DE
ENSMUSG00000034593	0.52361	6.57525	11.7902	0.000595428	0.0039981	Myo5a	9	1	75071015	75223688	non-DE
ENSMUSG00000013419	0.523557	4.40853	11.2121	0.000812668	0.00502697	Zfp651	9	1	121759330	121771742	non-DE
ENSMUSG00000036862	0.522904	6.30217	9.72166	0.00182109	0.00927714	Dchs1	7	-1	105752990	105787654	non-DE
ENSMUSG00000071178	0.522828	0.690203	1.50856	0.219359	0.351816	Serpina1b	12	-1	103728156	103830373	non-DE
ENSMUSG00000022974	0.52281	5.16224	11.2165	0.000810733	0.00502661	Paxbp1	16	-1	91014037	91044543	non-DE
ENSMUSG00000039852	0.522623	6.56734	27.255	1.78314e-07	1.19825e-05	Rere	4	1	150281646	150621966	non-DE
ENSMUSG00000022843	0.522583	3.16252	4.82891	0.0279864	0.0746254	Clcn2	16	-1	20702964	20717746	non-DE
ENSMUSG00000041530	0.522398	7.49558	18.588	1.62242e-05	0.000297948	Ago1	4	-1	126435012	126468583	non-DE
ENSMUSG00000058153	0.522155	0.952843	4.16759	0.0412044	0.100424	Sez6l	5	-1	112419151	112577185	non-DE
ENSMUSG00000037552	0.521693	6.10249	22.119	2.56256e-06	8.1258e-05	Plekhg2	7	-1	28359604	28372599	non-DE
ENSMUSG00000039652	0.521466	1.15052	4.01168	0.0451862	0.10776	Cpeb3	19	-1	37021291	37208601	non-DE
ENSMUSG00000042873	0.521141	3.75254	7.09102	0.00774713	0.0280143	Lhfpl4	6	-1	113168090	113195384	non-DE
ENSMUSG00000074731	0.520695	0.124184	2.42006	0.119791	0.224637	Zfp345	2	-1	150470991	150485091	non-DE
ENSMUSG00000075600	0.520537	2.74877	7.98321	0.00472132	0.0191279	Zc3h3	15	-1	75754430	75841915	non-DE
ENSMUSG00000032024	0.520517	5.67676	10.1443	0.00144749	0.00784663	Clmp	9	1	40685962	40785319	non-DE
ENSMUSG00000048895	0.520108	3.87703	4.04592	0.0442783	0.106187	Cdk5r1	11	1	80477023	80481184	non-DE
ENSMUSG00000034751	0.52007	4.81174	12.1989	0.000478177	0.00336003	Mast4	13	-1	102732486	103334497	non-DE
ENSMUSG00000090112	0.520049	5.5995	12.0403	0.00052063	0.00359091	Shprh	10	1	11149427	11217595	non-DE
ENSMUSG00000028060	0.520046	5.82259	14.8701	0.000115173	0.0012148	Khdc4	3	1	88685803	88712924	non-DE
ENSMUSG00000050666	0.520004	2.35361	1.95508	0.16204	0.280896	Vstm4	14	1	32856756	32939491	non-DE
ENSMUSG00000040651	0.51981	4.99936	7.80939	0.00519754	0.0206016	Fam208a	14	1	27428834	27483555	non-DE
ENSMUSG00000004231	0.519779	1.96671	3.42232	0.0643205	0.14079	Pax2	19	1	44756045	44837871	non-DE
ENSMUSG00000021066	0.519238	3.11422	5.77893	0.0162194	0.0491607	Atl1	12	1	69892614	69966417	non-DE
ENSMUSG00000029595	0.519218	2.50086	3.46102	0.0628316	0.138294	Lhx5	5	1	120431699	120441223	non-DE
ENSMUSG00000017412	0.519131	0.258694	2.84491	0.0916635	0.183929	Cacnb4	2	-1	52428320	52676831	non-DE
ENSMUSG00000035696	0.519073	6.50887	21.794	3.03555e-06	9.27206e-05	Rnf38	4	-1	44126210	44233789	non-DE
ENSMUSG00000033542	0.518867	4.01512	5.5868	0.0180963	0.0534637	Arhgef5	6	1	43265582	43289320	non-DE
ENSMUSG00000040606	0.518619	4.69829	8.70827	0.00316769	0.0141694	Kazn	4	-1	142102390	142239401	non-DE
ENSMUSG00000034109	0.518608	6.46436	11.5935	0.000661836	0.00431357	Golim4	3	-1	75875084	75956949	non-DE
ENSMUSG00000087141	0.518145	2.82539	5.61938	0.0177629	0.0526659	Plcxd2	16	-1	45959263	46010218	non-DE
ENSMUSG00000040111	0.518114	2.85744	4.29872	0.038141	0.0945753	Gramd1b	9	-1	40293233	40531383	non-DE
ENSMUSG00000017740	0.518104	1.69951	3.10773	0.0779217	0.162669	Slc12a5	2	1	164960802	164999731	non-DE
ENSMUSG00000064302	0.518058	6.87188	23.5658	1.20712e-06	4.89619e-05	Clasp1	1	1	118389058	118612678	non-DE
ENSMUSG00000064043	0.517942	3.99905	10.7305	0.00105383	0.00613481	Trerf1	17	1	47140875	47361958	non-DE
ENSMUSG00000047248	0.517605	5.73773	12.5583	0.000394452	0.00294452	C2cd3	7	1	100372233	100470152	non-DE
ENSMUSG00000051278	0.517459	4.76594	11.5788	0.000667089	0.00433881	Zgrf1	3	1	127553489	127618023	non-DE
ENSMUSG00000021457	0.517415	3.05194	8.2126	0.00416004	0.0173381	Syk	13	1	52583173	52648792	non-DE
ENSMUSG00000023328	0.517195	1.94889	4.51896	0.0335213	0.0859098	Ache	5	1	137287519	137294466	non-DE
ENSMUSG00000024236	0.516995	5.4557	13.5552	0.000231652	0.00199835	Svil	18	1	4920540	5119299	non-DE
ENSMUSG00000023961	0.516949	2.66995	4.29595	0.0382032	0.094698	Enpp4	17	-1	44096308	44105809	non-DE
ENSMUSG00000036281	0.516895	4.15067	9.63156	0.00191262	0.00963843	Snapc4	2	-1	26362765	26380653	non-DE
ENSMUSG00000022935	0.516178	0.315323	2.38212	0.122731	0.228586	Grik1	16	-1	87895900	88290265	non-DE
ENSMUSG00000031833	0.51613	3.74845	12.2425	0.000467126	0.00330821	Mast3	8	-1	70778117	70805054	non-DE
ENSMUSG00000028556	0.515718	6.9771	29.7618	4.88525e-08	4.62769e-06	Dock7	4	-1	98936671	99120915	non-DE
ENSMUSG00000049550	0.515464	6.16801	9.96088	0.00159901	0.00842394	Clip1	5	-1	123577795	123684618	non-DE
ENSMUSG00000020620	0.515462	0.503594	2.67383	0.10201	0.198616	Abca8b	11	-1	109932190	109995845	non-DE
ENSMUSG00000032217	0.515273	5.44578	18.4413	1.7522e-05	0.000314771	Rnf111	9	-1	70425424	70503725	non-DE
ENSMUSG00000030276	0.514727	0.409682	2.56042	0.10957	0.209699	Ttll3	6	1	113389260	113414587	non-DE
ENSMUSG00000020000	0.514507	3.89465	7.37972	0.00659635	0.0248621	Moxd1	10	1	24223517	24302790	non-DE
ENSMUSG00000047085	0.514439	3.90046	6.83624	0.00893266	0.031208	Lrrc4b	7	1	44429018	44463351	non-DE
ENSMUSG00000063632	0.514337	8.54698	22.4903	2.11204e-06	7.20068e-05	Sox11	12	-1	27334264	27342574	non-DE
ENSMUSG00000002249	0.514255	4.30202	9.07947	0.00258496	0.0120715	Tead3	17	-1	28331671	28350817	non-DE
ENSMUSG00000005237	0.514239	1.09979	3.71053	0.0540702	0.123534	Dnah2	11	-1	69420809	69549110	non-DE
ENSMUSG00000026933	0.514088	6.42558	30.5201	3.3043e-08	3.41073e-06	Camsap1	2	-1	25926838	25983282	non-DE
ENSMUSG00000045545	0.514045	1.33674	3.00042	0.0832432	0.170741	Krt14	11	-1	100203162	100207548	non-DE
ENSMUSG00000070047	0.513938	6.3012	7.17328	0.00739973	0.0270522	Fat1	8	1	44935447	45052257	non-DE
ENSMUSG00000022799	0.513856	5.13259	14.4167	0.000146496	0.00142953	Arhgap31	16	-1	38598340	38713274	non-DE
ENSMUSG00000041297	0.513638	6.33609	25.4519	4.53546e-07	2.35599e-05	Cdk13	13	-1	17710315	17805097	non-DE
ENSMUSG00000037447	0.513614	0.658143	3.25963	0.0710052	0.151728	Arid5a	1	1	36307733	36324029	non-DE
ENSMUSG00000042680	0.513417	4.05314	10.0284	0.00154141	0.00822356	Garem1	18	-1	21127201	21300138	non-DE
ENSMUSG00000031103	0.51315	3.55972	9.91121	0.00164275	0.00858855	Elf4	X	-1	48411046	48463132	non-DE
ENSMUSG00000024899	0.513077	1.07332	2.16313	0.141357	0.253893	Papss2	19	1	32620005	32667187	non-DE
ENSMUSG00000032743	0.513028	4.38568	10.9801	0.000920959	0.00553677	D430042O09Rik	7	1	125707888	125874793	non-DE
ENSMUSG00000022377	0.512843	6.3608	17.905	2.32206e-05	0.000382757	Asap1	15	-1	64086857	64382919	non-DE
ENSMUSG00000048572	0.512472	1.46432	3.74989	0.052811	0.121345	Tmem252	19	1	24674008	24679661	non-DE
ENSMUSG00000025815	0.512442	2.74487	6.30098	0.0120671	0.0393036	Dhtkd1	2	-1	5896115	5942792	non-DE
ENSMUSG00000038415	0.512298	0.310062	2.34874	0.125384	0.232279	Foxq1	13	1	31556134	31560976	non-DE
ENSMUSG00000033722	0.512153	3.39898	8.26714	0.00403691	0.0169482	BC034090	1	-1	155212471	155244444	non-DE
ENSMUSG00000068962	0.51209	0.739967	1.92319	0.165506	0.285449	Zfp114	7	1	24175060	24183188	non-DE
ENSMUSG00000041078	0.512082	0.623781	2.95227	0.0857572	0.174868	Grid1	14	1	34820108	35583379	non-DE
ENSMUSG00000040430	0.511694	5.27337	18.5671	1.64023e-05	0.000298647	Pitpnc1	11	-1	107207892	107470699	non-DE
ENSMUSG00000089810	0.510872	2.67959	3.85417	0.0496226	0.115686	Gm16536	9	-1	45856769	45858357	non-DE
ENSMUSG00000024163	0.510573	5.65152	8.54663	0.00346163	0.0151492	Mapk8ip3	17	-1	24892153	24936977	non-DE
ENSMUSG00000049739	0.51037	5.99678	20.3332	6.50606e-06	0.000156132	Zfp646	7	1	127876221	127885996	non-DE
ENSMUSG00000025867	0.510362	4.71242	10.554	0.00115936	0.00661033	Cplx2	13	1	54371349	54383917	non-DE
ENSMUSG00000024294	0.510314	7.35293	18.3027	1.88442e-05	0.000329873	Mib1	18	1	10725548	10818704	non-DE
ENSMUSG00000039286	0.510124	5.36823	8.40645	0.00373891	0.0160299	Fndc3b	3	-1	27416162	27711307	non-DE
ENSMUSG00000056116	0.509953	1.86472	0.648086	0.420798	0.558093	H2-T22	17	-1	36037128	36042747	non-DE
ENSMUSG00000048458	0.509888	1.84271	3.46063	0.0628462	0.138306	Inka2	3	1	105704599	105720842	non-DE
ENSMUSG00000044676	0.509822	2.99807	6.71655	0.00955222	0.0329041	Zfp612	8	1	110079746	110092741	non-DE
ENSMUSG00000074934	0.509708	3.38564	8.37985	0.00379404	0.0162034	Grem1	2	-1	113746164	113758646	non-DE
ENSMUSG00000024940	0.509162	2.31513	2.89772	0.0887048	0.17963	Ltbp3	19	1	5740904	5758532	non-DE
ENSMUSG00000059981	0.509123	6.32774	12.8367	0.000339892	0.00263759	Taok2	7	-1	126865678	126884703	non-DE
ENSMUSG00000021047	0.509123	4.59889	12.7078	0.000364126	0.00277347	Nova1	12	-1	46694517	46818929	non-DE
ENSMUSG00000061808	0.509016	1.63686	1.3239	0.249893	0.387299	Ttr	18	1	20665280	20674321	non-DE
ENSMUSG00000021244	0.508974	6.4719	28.1581	1.118e-07	8.53732e-06	Ylpm1	12	1	84996321	85070515	non-DE
ENSMUSG00000060862	0.508952	4.23221	13.5452	0.000232885	0.00200667	Zbtb40	4	-1	136979732	137048801	non-DE
ENSMUSG00000000567	0.508788	5.68267	17.4113	3.01032e-05	0.000464011	Sox9	11	1	112782224	112787760	non-DE
ENSMUSG00000022469	0.507859	2.26079	4.32793	0.0374918	0.0934144	Rapgef3	15	-1	97744770	97767972	non-DE
ENSMUSG00000061576	0.507738	2.38435	4.39954	0.0359487	0.0904885	Dpp6	5	1	26817203	27727505	non-DE
ENSMUSG00000033054	0.507407	5.63491	12.2312	0.000469976	0.00332426	Npat	9	1	53537047	53574342	non-DE
ENSMUSG00000038855	0.507052	4.45867	7.17541	0.00739094	0.0270495	Itpkb	1	1	180330485	180424802	non-DE
ENSMUSG00000032688	0.50677	3.17709	4.6419	0.0312005	0.0813126	Malt1	18	1	65430962	65478823	non-DE
ENSMUSG00000027878	0.506742	5.86696	10.9447	0.000938694	0.00560856	Notch2	3	1	98013527	98150361	non-DE
ENSMUSG00000062604	0.506663	6.11707	15.8879	6.72072e-05	0.000823934	Srpk2	5	-1	23503264	23684617	non-DE
ENSMUSG00000035623	0.506583	6.1931	12.7607	0.00035398	0.00271137	Rsf1	7	1	97579889	97692778	non-DE
ENSMUSG00000022272	0.506499	5.98647	20.7641	5.19474e-06	0.000134236	Myo10	15	1	25622525	25813673	non-DE
ENSMUSG00000034771	0.506461	0.760163	1.72254	0.189366	0.315372	Tle2	10	1	81574561	81590845	non-DE
ENSMUSG00000028610	0.506344	0.635111	3.11169	0.0777325	0.162484	Dmrtb1	4	-1	107676290	107684230	non-DE
ENSMUSG00000070939	0.506187	4.80046	16.5953	4.62666e-05	0.000627442	Tgfbrap1	1	-1	43047200	43098637	non-DE
ENSMUSG00000026452	0.50598	2.04167	2.19542	0.138421	0.25	Syt2	1	1	134646677	134762593	non-DE
ENSMUSG00000042284	0.505844	3.53901	6.41151	0.0113383	0.0374945	Itga1	13	-1	114953096	115101964	non-DE
ENSMUSG00000032558	0.505666	3.05763	5.38585	0.0203007	0.0583636	Nphp3	9	1	104002544	104043818	non-DE
ENSMUSG00000028197	0.505425	1.04836	2.30732	0.128766	0.236703	Col24a1	3	1	145292472	145552011	non-DE
ENSMUSG00000036391	0.505279	4.57387	14.1265	0.000170916	0.00161191	Sec24a	11	-1	51692264	51763634	non-DE
ENSMUSG00000061410	0.505086	6.49144	22.9209	1.68807e-06	6.11752e-05	Zcchc14	8	-1	121598703	121652901	non-DE
ENSMUSG00000033943	0.505006	6.6615	12.5891	0.000388	0.00290796	Mga	2	1	119897228	119969581	non-DE
ENSMUSG00000021194	0.504871	2.10052	4.12044	0.0423682	0.102742	Chga	12	1	102554969	102565028	non-DE
ENSMUSG00000020473	0.504667	3.64267	6.7033	0.00962347	0.0330866	Aebp1	11	1	5861947	5872088	non-DE
ENSMUSG00000032212	0.504495	6.57881	22.1322	2.54504e-06	8.1258e-05	Sltm	9	1	70542754	70592234	non-DE
ENSMUSG00000052572	0.504165	0.838028	3.16815	0.0750875	0.158465	Dlg2	7	1	90476672	92449247	non-DE
ENSMUSG00000037138	0.504042	5.54662	19.2961	1.11932e-05	0.000227621	Aff3	1	-1	38177326	38664955	non-DE
ENSMUSG00000024391	0.503873	0.441109	2.6762	0.101859	0.198428	Apom	17	-1	35128997	35132050	non-DE
ENSMUSG00000010608	0.503773	7.68666	12.276	0.000458824	0.00327635	Rbm25	12	1	83631236	83683123	non-DE
ENSMUSG00000074582	0.503736	5.25037	16.0787	6.07635e-05	0.000766173	Arfgef2	2	1	166805588	166898052	non-DE
ENSMUSG00000048482	0.503636	1.91331	4.03299	0.0446187	0.106679	Bdnf	2	1	109674700	109727007	non-DE
ENSMUSG00000054199	0.503141	5.21579	9.96193	0.0015981	0.00842212	Gon4l	3	1	88835231	88910103	non-DE
ENSMUSG00000061527	0.502933	2.60428	3.6351	0.0565731	0.127982	Krt5	15	-1	101707070	101712898	non-DE
ENSMUSG00000033237	0.502919	7.31592	24.2172	8.60618e-07	3.7228e-05	Arid2	15	1	96287518	96404992	non-DE
ENSMUSG00000039458	0.502829	4.71301	12.242	0.000467265	0.00330821	Mtmr12	15	1	12205028	12274496	non-DE
ENSMUSG00000020728	0.502715	3.44426	8.51156	0.00352897	0.0153682	Cep112	11	1	108425192	108860615	non-DE
ENSMUSG00000050777	0.502647	2.91774	0.934812	0.333616	0.475455	Tmem37	1	-1	120067377	120074074	non-DE
ENSMUSG00000066829	0.502541	3.81428	7.97027	0.0047552	0.0192094	Zfp810	9	-1	22276748	22307648	non-DE
ENSMUSG00000036298	0.502459	1.71	3.03974	0.0812488	0.167801	Slc2a13	15	-1	91267696	91573261	non-DE
ENSMUSG00000031438	0.502452	3.60344	1.16108	0.281241	0.420849	Rnf128	X	1	139563316	139673145	non-DE
ENSMUSG00000061411	0.502056	5.49705	15.2322	9.50689e-05	0.00104625	Nol4l	2	-1	153407462	153529971	non-DE
ENSMUSG00000023022	0.501953	6.52322	17.3843	3.05332e-05	0.000466316	Lima1	15	-1	99778470	99875456	non-DE
ENSMUSG00000042323	0.501742	7.79594	18.3314	1.85622e-05	0.000326986	Pbrm1	14	1	31019138	31121592	non-DE
ENSMUSG00000025875	0.501445	1.74738	3.84763	0.0498163	0.116065	Tspan17	13	1	54789377	54796776	non-DE
ENSMUSG00000048782	0.50114	2.35991	3.04263	0.0811047	0.16764	Insc	7	1	114743694	114850383	non-DE
ENSMUSG00000045098	0.501013	5.65245	14.7308	0.000124001	0.00127519	Kmt5b	19	1	3767421	3818303	non-DE
ENSMUSG00000037989	0.500877	4.2209	10.573	0.00114749	0.00655515	Wnk2	13	-1	49036303	49148014	non-DE
ENSMUSG00000040711	0.500837	6.70323	17.4716	2.91633e-05	0.000453257	Sh3pxd2b	11	1	32347820	32428173	non-DE
ENSMUSG00000085566	0.50068	0.61572	1.80604	0.178985	0.302491	A730017L22Rik	2	-1	130873059	130906396	non-DE
ENSMUSG00000035051	0.500666	5.09017	16.4078	5.10743e-05	0.000677685	Dhx57	17	-1	80238309	80290476	non-DE
ENSMUSG00000039298	0.500378	6.4359	14.8614	0.000115706	0.00121527	Cdk5rap2	4	-1	70216856	70410443	non-DE
ENSMUSG00000106981	0.500357	0.245774	2.10393	0.146921	0.261222	Gm45495	5	1	53281810	53283509	non-DE
ENSMUSG00000111375	0.500178	2.35082	3.89562	0.0484122	0.113643	Btbd8	5	1	107437997	107511207	non-DE
ENSMUSG00000030102	0.499855	4.98491	14.6014	0.000132815	0.00134223	Itpr1	6	1	108213096	108551109	non-DE
ENSMUSG00000001151	0.499829	5.85693	14.0297	0.000179949	0.00166974	Pcnt	10	-1	76351263	76442786	non-DE
ENSMUSG00000075028	0.499827	4.19087	6.69376	0.00967509	0.0331974	Prdm11	2	-1	92965151	93046167	non-DE
ENSMUSG00000015484	0.499599	0.846531	2.54704	0.110501	0.211249	Fam163a	1	-1	156075966	156205026	non-DE
ENSMUSG00000041298	0.499541	4.01041	6.49701	0.0108056	0.0361807	Katnal1	5	-1	148871584	148929320	non-DE
ENSMUSG00000020882	0.49946	2.37824	2.99497	0.0835235	0.171105	Cacnb1	11	-1	98001508	98023034	non-DE
ENSMUSG00000031274	0.499431	5.91767	11.8774	0.000568183	0.00383235	Col4a5	X	1	141475385	141689234	non-DE
ENSMUSG00000041592	0.499231	4.16894	9.21118	0.00240541	0.0114146	Sdk2	11	-1	113776374	114067046	non-DE
ENSMUSG00000044452	0.499158	5.71534	10.3752	0.0012772	0.00711947	Zfp507	7	-1	35772343	35803003	non-DE
ENSMUSG00000032358	0.499121	1.17523	3.77092	0.0521508	0.12038	Fam83b	9	-1	76490054	76567116	non-DE
ENSMUSG00000044312	0.499047	0.429032	2.68176	0.101503	0.197896	Neurog3	10	1	62133090	62134763	non-DE
ENSMUSG00000097379	0.499024	-0.178582	1.46786	0.225683	0.358958	Gm26873	17	-1	17389943	17411993	non-DE
ENSMUSG00000024754	0.498684	7.10351	15.8876	6.72161e-05	0.000823934	Cemip2	19	1	21778342	21858327	non-DE
ENSMUSG00000046311	0.498484	5.97453	11.6623	0.000637797	0.00419785	Zfp62	11	1	49203292	49218816	non-DE
ENSMUSG00000037492	0.498416	1.66248	2.88097	0.0896319	0.181066	Zmat4	8	1	23636019	24156585	non-DE
ENSMUSG00000033792	0.498318	5.34415	7.21553	0.00722754	0.0266637	Atp7a	X	1	106027276	106124926	non-DE
ENSMUSG00000030046	0.498123	2.20407	5.58747	0.0180894	0.0534538	Bmp10	6	1	87428994	87437677	non-DE
ENSMUSG00000036564	0.498057	3.65824	7.29405	0.00691835	0.0257132	Ndrg4	8	1	95676980	95715119	non-DE
ENSMUSG00000079575	0.498043	1.39983	3.37025	0.0663837	0.144183	Rbpj-ps3	6	-1	46529354	46530794	non-DE
ENSMUSG00000034738	0.497929	0.76279	0.997894	0.317821	0.458401	Nostrin	2	1	69135800	69189330	non-DE
ENSMUSG00000038866	0.497664	4.32332	12.6912	0.000367376	0.00278688	Zcchc2	1	1	105990406	106034074	non-DE
ENSMUSG00000026109	0.497354	1.44832	3.6171	0.0571884	0.128984	Tmeff2	1	1	50900647	51187270	non-DE
ENSMUSG00000028312	0.4972	8.05441	15.9365	6.55042e-05	0.00080758	Smc2	4	1	52439243	52488260	non-DE
ENSMUSG00000025404	0.497132	5.882	13.0222	0.000307822	0.00244672	R3hdm2	10	1	127380327	127499384	non-DE
ENSMUSG00000027272	0.496893	5.63046	12.6619	0.000373177	0.00282088	Ubr1	2	-1	120860269	120970715	non-DE
ENSMUSG00000033147	0.49627	2.38322	3.71735	0.0538496	0.123141	Slc22a15	3	-1	101855776	101924453	non-DE
ENSMUSG00000032712	0.496161	5.92418	14.862	0.000115673	0.00121527	Resf1	6	1	149309414	149335663	non-DE
ENSMUSG00000112280	0.495997	2.52303	4.09546	0.0429986	0.103824	A830082N09Rik	10	-1	33987216	33995055	non-DE
ENSMUSG00000021704	0.495949	4.51109	7.5784	0.00590718	0.0228339	Mtx3	13	1	92844760	92858230	non-DE
ENSMUSG00000035437	0.495633	6.26858	13.8388	0.000199183	0.00178989	Rabgap1	2	1	37443279	37566454	non-DE
ENSMUSG00000066036	0.495576	6.52086	8.2689	0.00403299	0.0169365	Ubr4	4	1	139352609	139489588	non-DE
ENSMUSG00000028637	0.495249	1.69348	4.63776	0.0312758	0.0814597	Ccdc30	4	-1	119322893	119415521	non-DE
ENSMUSG00000020393	0.494987	5.15578	15.7332	7.2933e-05	0.000864967	Kremen1	11	-1	5191552	5261558	non-DE
ENSMUSG00000043639	0.494583	2.2698	4.84156	0.0277818	0.0742121	Rbm20	19	1	53677306	53867080	non-DE
ENSMUSG00000019907	0.494535	6.5129	15.8742	6.76939e-05	0.000827081	Ppp1r12a	10	1	108162193	108284475	non-DE
ENSMUSG00000000631	0.494041	5.99314	15.2369	9.48307e-05	0.00104516	Myo18a	11	1	77763246	77865980	non-DE
ENSMUSG00000052430	0.493878	4.28245	7.20025	0.00728935	0.0267664	Bmpr1b	3	-1	141837136	142169425	non-DE
ENSMUSG00000068551	0.493743	3.37597	7.94713	0.00481636	0.0194042	Zfp467	6	-1	48427697	48445825	non-DE
ENSMUSG00000092341	0.493703	3.47246	3.16169	0.0753851	0.158926	Malat1	19	-1	5795690	5802672	non-DE
ENSMUSG00000054263	0.493634	5.14134	8.12661	0.00436202	0.0179951	Lifr	15	1	7090614	7197489	non-DE
ENSMUSG00000045482	0.4934	6.86622	12.4908	0.00040897	0.00301827	Trrap	5	1	144767732	144859778	non-DE
ENSMUSG00000044456	0.49332	3.03912	7.56286	0.00595833	0.0229663	Rin3	12	1	102283048	102390855	non-DE
ENSMUSG00000054640	0.493304	4.52114	9.84533	0.00170263	0.0088208	Slc8a1	17	-1	81373105	81738377	non-DE
ENSMUSG00000057069	0.493219	2.23649	3.9271	0.0475139	0.112044	Ero1lb	13	1	12565874	12611396	non-DE
ENSMUSG00000025478	0.493086	5.52892	9.21521	0.00240013	0.0113968	Dpysl4	7	1	139086001	139102704	non-DE
ENSMUSG00000026339	0.492963	5.12548	14.6646	0.000128437	0.00131216	Ccdc93	1	1	121431049	121506460	non-DE
ENSMUSG00000040310	0.492868	5.49848	10.7364	0.00105048	0.00612012	Alx4	2	1	93642384	93681339	non-DE
ENSMUSG00000063382	0.492679	5.0961	11.07	0.000877334	0.00534217	Bcl9l	9	1	44482825	44511896	non-DE
ENSMUSG00000034390	0.492553	5.32092	17.3926	3.04012e-05	0.000466316	Cmip	8	1	117257064	117459430	non-DE
ENSMUSG00000056004	0.49255	2.14683	5.3752	0.020425	0.0586197	9330182L06Rik	5	1	9266118	9481825	non-DE
ENSMUSG00000027177	0.492526	6.56498	22.6868	1.90674e-06	6.66782e-05	Hipk3	2	-1	104426481	104494446	non-DE
ENSMUSG00000059456	0.492268	1.30181	4.2814	0.0385316	0.0953226	Ptk2b	14	-1	66153257	66281052	non-DE
ENSMUSG00000041134	0.492266	3.16838	4.58938	0.0321707	0.0831891	Cyyr1	16	-1	85421533	85553397	non-DE
ENSMUSG00000048911	0.492095	4.4676	5.5171	0.0188315	0.0550598	Rnf24	2	-1	131298064	131352892	non-DE
ENSMUSG00000031292	0.49206	3.48423	7.13493	0.00755965	0.0274758	Cdkl5	X	-1	160771923	160994704	non-DE
ENSMUSG00000024240	0.492053	5.32574	13.1671	0.00028491	0.00232131	Epc1	18	-1	6435951	6516108	non-DE
ENSMUSG00000048186	0.492042	1.6921	3.59753	0.0578656	0.130118	Bend7	2	1	4717831	4802142	non-DE
ENSMUSG00000020140	0.49196	2.53136	6.46875	0.0109788	0.0365277	Lgr5	10	-1	115450311	115587780	non-DE
ENSMUSG00000030486	0.491877	0.937272	2.50063	0.113801	0.216177	Zfp108	7	1	24254794	24262445	non-DE
ENSMUSG00000026803	0.491542	4.69873	12.1893	0.000480651	0.00337577	Ttf1	2	1	29060262	29087656	non-DE
ENSMUSG00000074994	0.491383	6.67686	15.3718	8.82972e-05	0.00098844	Qser1	2	-1	104754795	104816760	non-DE
ENSMUSG00000002265	0.491349	9.60357	19.1845	1.18674e-05	0.000235882	Peg3	7	-1	6703892	6730431	non-DE
ENSMUSG00000028931	0.491343	2.80152	5.95971	0.0146364	0.0454017	Kcnab2	4	-1	152390742	152477871	non-DE
ENSMUSG00000105977	0.491336	0.168867	2.26822	0.132052	0.241233	Gm43555	3	-1	55057347	55057656	non-DE
ENSMUSG00000033016	0.49123	2.48792	5.97598	0.014502	0.0451439	Nfatc1	18	-1	80606205	80713071	non-DE
ENSMUSG00000030172	0.491141	5.79001	19.1547	1.20543e-05	0.000237704	Erc1	6	-1	119570796	119848167	non-DE
ENSMUSG00000026170	0.49114	1.18057	3.10381	0.0781092	0.16289	Cyp27a1	1	1	74713574	74737892	non-DE
ENSMUSG00000048814	0.491065	3.51918	4.39189	0.0361102	0.0907577	Lonrf2	1	-1	38793645	38836711	non-DE
ENSMUSG00000054162	0.4907	2.2186	4.05516	0.0440364	0.105709	Spock3	8	1	62951009	63357103	non-DE
ENSMUSG00000055866	0.490338	1.8809	3.72772	0.0535165	0.122624	Per2	1	-1	91415982	91459324	non-DE
ENSMUSG00000002489	0.490332	5.37024	8.43875	0.00367308	0.0158133	Tiam1	16	-1	89787111	90143769	non-DE
ENSMUSG00000037896	0.490179	5.96042	12.2537	0.000464348	0.00329692	Rcor1	12	1	111039351	111115901	non-DE
ENSMUSG00000089857	0.490153	3.73061	6.42286	0.0112661	0.0373134	Zfp882	8	1	71908608	71916354	non-DE
ENSMUSG00000037541	0.489662	2.2074	3.0945	0.0785571	0.16355	Shank2	7	1	144001928	144424494	non-DE
ENSMUSG00000022983	0.489546	5.7958	25.5008	4.42202e-07	2.30608e-05	Scaf4	16	-1	90225680	90284503	non-DE
ENSMUSG00000031166	0.489257	4.45311	8.34888	0.00385924	0.0163782	Wdr13	X	-1	8123301	8132892	non-DE
ENSMUSG00000024130	0.489233	3.91916	5.13762	0.0234128	0.065049	Abca3	17	1	24351950	24410201	non-DE
ENSMUSG00000037933	0.489049	6.14198	15.6449	7.64193e-05	0.000891604	Bicd2	13	1	49341585	49387026	non-DE
ENSMUSG00000026556	0.488973	6.61126	19.9633	7.89429e-06	0.000179838	Vangl2	1	-1	172000960	172028444	non-DE
ENSMUSG00000063146	0.488942	5.8461	15.6445	7.64344e-05	0.000891604	Clip2	5	-1	134489383	134552434	non-DE
ENSMUSG00000040570	0.488745	2.76025	4.57908	0.0323645	0.083546	Rundc3b	5	-1	8490334	8622952	non-DE
ENSMUSG00000037847	0.488289	1.59502	2.7584	0.0967449	0.190926	Nmrk1	19	1	18631950	18652194	non-DE
ENSMUSG00000035615	0.488063	2.21894	2.28706	0.130457	0.239108	Frmpd1	4	1	45184875	45285936	non-DE
ENSMUSG00000107096	0.487805	0.739723	3.30314	0.0691474	0.148621	Gm43597	5	-1	150599932	150607003	non-DE
ENSMUSG00000004085	0.487753	3.90986	6.44292	0.0111395	0.0369925	Map3k20	2	1	72285637	72442610	non-DE
ENSMUSG00000033900	0.487617	4.13347	7.5757	0.00591603	0.0228445	Map9	3	1	82358044	82395268	non-DE
ENSMUSG00000029602	0.48756	0.396065	0.91596	0.338538	0.479759	Rasal1	5	1	120648812	120679597	non-DE
ENSMUSG00000058396	0.487427	1.95323	5.06363	0.0244331	0.0670744	Gpr182	10	-1	127747276	127751732	non-DE
ENSMUSG00000020527	0.487291	4.16651	7.34261	0.00673388	0.0252307	Myo19	11	1	84880148	84911226	non-DE
ENSMUSG00000001156	0.487143	3.6014	8.02964	0.00460179	0.0187381	Mxd1	6	-1	86647042	86669161	non-DE
ENSMUSG00000022661	0.487011	2.08492	2.72029	0.0990802	0.194381	Cd200	16	-1	45382135	45409053	non-DE
ENSMUSG00000109472	0.486638	0.746005	3.16199	0.0753713	0.158926	Gm18943	7	-1	99247605	99248820	non-DE
ENSMUSG00000030213	0.486549	6.40528	19.7396	8.87429e-06	0.0001955	Atf7ip	6	1	136506167	136610862	non-DE
ENSMUSG00000058325	0.486499	6.34748	24.5052	7.41102e-07	3.29142e-05	Dock1	7	1	134670654	135173639	non-DE
ENSMUSG00000035021	0.486388	6.06722	19.5247	9.93067e-06	0.000211125	Baz1a	12	-1	54892989	55014348	non-DE
ENSMUSG00000078651	0.486326	1.65363	4.15339	0.0415514	0.101073	Aoc2	11	1	101325063	101329702	non-DE
ENSMUSG00000039278	0.48626	1.2562	2.57343	0.108672	0.208347	Pcsk1n	X	1	7919822	7924410	non-DE
ENSMUSG00000011832	0.486184	3.82722	6.07864	0.0136826	0.0431769	Evi5l	8	1	4166567	4211257	non-DE
ENSMUSG00000044317	0.485682	1.61641	2.40351	0.121063	0.226325	Gpr4	7	1	19212538	19224174	non-DE
ENSMUSG00000005533	0.485669	6.41701	12.7741	0.000351453	0.00269616	Igf1r	7	1	67952827	68233668	non-DE
ENSMUSG00000027365	0.484996	6.94028	12.5324	0.000399955	0.00297226	Trpm7	2	-1	126791565	126876230	non-DE
ENSMUSG00000092187	0.484947	0.516104	2.15843	0.14179	0.254304	Gm20457	7	-1	64337550	64345964	non-DE
ENSMUSG00000085438	0.484872	7.51608	13.7324	0.000210791	0.0018613	1700020I14Rik	2	1	119594297	119607502	non-DE
ENSMUSG00000000093	0.484767	5.02622	9.51875	0.00203383	0.0100729	Tbx2	11	1	85832551	85841948	non-DE
ENSMUSG00000058966	0.484561	1.20318	3.13146	0.076795	0.161092	Fam57b	7	1	126797668	126830219	non-DE
ENSMUSG00000037791	0.484	5.76415	13.6007	0.000226103	0.00195724	Phf12	11	1	77982754	78030539	non-DE
ENSMUSG00000055538	0.483635	5.23639	13.8817	0.000194686	0.00176705	Zcchc24	14	-1	25711642	25769039	non-DE
ENSMUSG00000031561	0.4836	7.05992	14.5695	0.000135081	0.0013544	Tenm3	8	-1	48227682	48843951	non-DE
ENSMUSG00000014599	0.483498	3.00672	6.47806	0.0109214	0.03643	Csf1	3	-1	107741048	107760469	non-DE
ENSMUSG00000051550	0.483314	3.09435	5.74445	0.0165409	0.0499228	Zfp579	7	-1	4983483	4996158	non-DE
ENSMUSG00000038375	0.483253	5.58752	9.28541	0.00230986	0.0110771	Trp53inp2	2	1	155381059	155389850	non-DE
ENSMUSG00000059049	0.483038	5.13086	8.09975	0.00442713	0.0181835	Frem1	4	-1	82897920	83052339	non-DE
ENSMUSG00000034342	0.482857	6.59199	17.6452	2.66185e-05	0.000425014	Cbl	9	-1	44142976	44234049	non-DE
ENSMUSG00000029502	0.482694	5.74988	14.9691	0.000109284	0.00117	Golga3	5	1	110176701	110226470	non-DE
ENSMUSG00000057842	0.482622	2.42423	5.41614	0.0199514	0.0575471	Zfp595	13	-1	67312998	67332570	non-DE
ENSMUSG00000034269	0.482521	7.88011	14.2151	0.000163059	0.0015573	Setd5	6	1	113077365	113153435	non-DE
ENSMUSG00000074785	0.482451	3.51134	5.62855	0.0176703	0.052464	Plxnc1	10	-1	94790866	94944835	non-DE
ENSMUSG00000038844	0.481866	4.60034	11.375	0.000744399	0.00471296	Kif16b	2	-1	142617474	142901531	non-DE
ENSMUSG00000058297	0.48177	4.1754	5.56221	0.0183522	0.0540171	Spock2	10	1	60106219	60135198	non-DE
ENSMUSG00000025352	0.481681	5.65494	13.0546	0.000302538	0.00241885	Gdf11	10	-1	128882295	128891718	non-DE
ENSMUSG00000033152	0.481584	3.48611	5.60216	0.0179384	0.0530495	Podxl2	6	-1	88842558	88875044	non-DE
ENSMUSG00000025885	0.481581	3.40772	9.72211	0.00182064	0.00927714	Myo5b	18	1	74440936	74771493	non-DE
ENSMUSG00000027238	0.481576	3.55806	7.50699	0.00614598	0.0235743	Frmd5	2	-1	121545529	121807087	non-DE
ENSMUSG00000029167	0.481193	1.81725	3.93133	0.0473946	0.111868	Ppargc1a	5	-1	51454250	51567726	non-DE
ENSMUSG00000038658	0.481123	5.69402	9.66947	0.00187355	0.00948499	Ric1	19	1	29522282	29606829	non-DE
ENSMUSG00000021133	0.481092	4.92753	10.1008	0.00148204	0.00797616	Susd6	12	1	80790510	80880835	non-DE
ENSMUSG00000091387	0.480976	1.40731	2.21895	0.136326	0.247051	Gcnt4	13	1	96924689	96950906	non-DE
ENSMUSG00000020886	0.48065	4.567	7.13709	0.00755058	0.0274495	Dlg4	11	1	70016942	70047522	non-DE
ENSMUSG00000057766	0.480649	1.40311	2.72688	0.0986718	0.193834	Ankrd29	18	-1	12252362	12305797	non-DE
ENSMUSG00000034066	0.480576	3.12202	7.00065	0.00814801	0.0291192	Farp2	1	1	93512079	93621976	non-DE
ENSMUSG00000057982	0.480486	2.9455	4.95107	0.0260745	0.0704943	Zfp809	9	1	22225714	22243354	non-DE
ENSMUSG00000041328	0.480319	5.90392	9.17599	0.0024521	0.0115738	Pcf11	7	-1	92643543	92669934	non-DE
ENSMUSG00000040258	0.479713	1.79544	3.19733	0.0737584	0.156322	Nxph4	10	-1	127525473	127534559	non-DE
ENSMUSG00000020807	0.479192	4.25986	8.45137	0.00364768	0.0157332	4933427D14Rik	11	-1	72153929	72207459	non-DE
ENSMUSG00000058706	0.47902	4.9243	11.5892	0.000663355	0.00432047	0610030E20Rik	6	1	72347317	72353148	non-DE
ENSMUSG00000051034	0.478834	2.61971	5.86738	0.015424	0.0473064	Zfp11	5	-1	129654593	129670099	non-DE
ENSMUSG00000020599	0.478649	1.73589	3.38239	0.0658966	0.143395	Rgs9	11	-1	109225355	109298129	non-DE
ENSMUSG00000036002	0.47859	3.62855	5.62538	0.0177023	0.0525173	Fam214b	4	-1	43032414	43046220	non-DE
ENSMUSG00000034863	0.478496	4.68581	9.94093	0.00161644	0.00847991	Ano8	8	-1	71476019	71485963	non-DE
ENSMUSG00000044788	0.478481	1.02555	2.01003	0.156262	0.273309	Fads6	11	-1	115279622	115297663	non-DE
ENSMUSG00000039735	0.478424	7.62667	15.85	6.85657e-05	0.000835006	Fnbp1l	3	-1	122538719	122619715	non-DE
ENSMUSG00000025949	0.47793	5.25666	9.41882	0.00214769	0.0105013	Pikfyve	1	1	65186683	65278695	non-DE
ENSMUSG00000039765	0.477699	4.10132	8.81799	0.00298275	0.0135651	Cc2d2a	5	1	43662346	43740972	non-DE
ENSMUSG00000009418	0.477695	5.54767	17.321	3.15678e-05	0.000478214	Nav1	1	-1	135434580	135607295	non-DE
ENSMUSG00000027993	0.477526	6.24079	13.3058	0.000264583	0.00219391	Trim2	3	-1	84160439	84306877	non-DE
ENSMUSG00000069769	0.477309	7.27766	10.1141	0.00147137	0.00793658	Msi2	11	-1	88339382	88718513	non-DE
ENSMUSG00000054611	0.4773	6.92643	11.5781	0.000667331	0.00433881	Kdm2a	19	-1	4314419	4398285	non-DE
ENSMUSG00000062743	0.476827	1.44456	4.0378	0.0444917	0.106477	Zfp677	17	1	21383748	21399265	non-DE
ENSMUSG00000079487	0.476734	5.36624	13.5765	0.000229034	0.00198147	Med12	X	1	101274030	101297465	non-DE
ENSMUSG00000060487	0.476706	4.15652	11.213	0.00081228	0.00502697	Samd5	10	-1	9622936	9675208	non-DE
ENSMUSG00000042390	0.476685	5.96117	14.7682	0.00012157	0.00125618	Gatad2b	3	1	90293178	90363407	non-DE
ENSMUSG00000016255	0.476488	2.11743	2.31462	0.128163	0.235917	Tubb1	2	1	174450695	174457882	non-DE
ENSMUSG00000045636	0.476425	4.45147	6.05894	0.0138361	0.0435235	Mtus1	8	-1	40990914	41133726	non-DE
ENSMUSG00000023007	0.476369	4.71921	8.25138	0.0040721	0.0170625	Prpf40b	15	1	99295087	99317018	non-DE
ENSMUSG00000006464	0.476333	4.23958	11.836	0.000580963	0.00391327	Bbs1	19	-1	4886898	4906627	non-DE
ENSMUSG00000035649	0.476313	4.15948	9.21274	0.00240337	0.0114086	Zcchc7	4	1	44755877	44932215	non-DE
ENSMUSG00000029804	0.476221	3.53065	9.27058	0.00232864	0.0111328	Herc3	6	1	58831465	58920398	non-DE
ENSMUSG00000038524	0.476128	1.8798	4.35143	0.0369778	0.092426	Fchsd1	18	-1	37957431	37969774	non-DE
ENSMUSG00000037784	0.47612	4.9986	12.3743	0.000435295	0.00314585	Dzip1l	9	1	99629496	99669256	non-DE
ENSMUSG00000021448	0.475839	1.17294	2.29554	0.129746	0.238083	Shc3	13	-1	51431041	51569419	non-DE
ENSMUSG00000043535	0.475679	6.66674	13.1464	0.000288076	0.0023344	Setx	2	1	29124181	29182471	non-DE
ENSMUSG00000021668	0.475381	2.95479	5.52853	0.0187088	0.0547975	Polk	13	-1	96480690	96542579	non-DE
ENSMUSG00000051703	0.475189	1.57412	3.93696	0.0472361	0.111538	Tmem198	1	1	75479532	75485705	non-DE
ENSMUSG00000017132	0.47491	4.42856	9.09699	0.0025603	0.0119825	Cyth1	11	-1	118132019	118248592	non-DE
ENSMUSG00000048388	0.474875	5.3153	7.19977	0.00729131	0.026767	Fam171b	2	1	83812636	83883486	non-DE
ENSMUSG00000042388	0.474824	2.09312	4.24729	0.0393129	0.0967917	Dlgap3	4	1	127169204	127237022	non-DE
ENSMUSG00000053965	0.474816	5.08318	12.4003	0.000429257	0.00311878	Pde5a	3	1	122728947	122859374	non-DE
ENSMUSG00000037624	0.474495	1.91078	4.19571	0.0405265	0.0992027	Kcnk2	1	-1	189207930	189402273	non-DE
ENSMUSG00000028514	0.474129	6.51207	14.1512	0.000168687	0.00159762	Usp24	4	1	106316213	106441322	non-DE
ENSMUSG00000004568	0.473938	4.93113	10.311	0.00132238	0.00732223	Arhgef18	8	1	3393006	3456601	non-DE
ENSMUSG00000033676	0.473881	2.59873	3.7173	0.0538513	0.123141	Gabrb3	7	1	57419692	57828802	non-DE
ENSMUSG00000032368	0.473643	6.58989	17.2175	3.33346e-05	0.000496932	Zic1	9	-1	91358058	91365810	non-DE
ENSMUSG00000022537	0.473635	3.8363	8.08577	0.00446142	0.0182592	Tmem44	16	-1	30511855	30550842	non-DE
ENSMUSG00000026821	0.473491	5.79008	12.6693	0.000371707	0.00281119	Ralgds	2	1	28513125	28553081	non-DE
ENSMUSG00000043019	0.473458	6.14556	13.7998	0.000203357	0.00180954	Edem3	1	1	151755371	151822051	non-DE
ENSMUSG00000006219	0.473451	4.97945	9.9482	0.00161007	0.00846132	Fblim1	4	-1	141576062	141606096	non-DE
ENSMUSG00000064128	0.473356	5.02024	15.8241	6.95114e-05	0.000838003	Cenpj	14	-1	56526761	56575425	non-DE
ENSMUSG00000038593	0.47324	3.37957	8.09595	0.00443643	0.0182068	Tctn1	5	-1	122237848	122264460	non-DE
ENSMUSG00000030249	0.472964	3.21798	7.24975	0.00709108	0.0262509	Abcc9	6	-1	142587862	142702315	non-DE
ENSMUSG00000035189	0.472809	1.22891	4.04239	0.0443709	0.10629	Ano4	10	-1	88948994	89344762	non-DE
ENSMUSG00000039840	0.472656	4.18247	5.9401	0.0148002	0.0457959	Epg5	18	1	77938467	78035027	non-DE
ENSMUSG00000020300	0.472635	4.46277	6.51826	0.0106772	0.0358471	Cpeb4	11	1	31872211	31935634	non-DE
ENSMUSG00000040187	0.47258	0.313472	1.64296	0.19992	0.328364	Arntl2	6	1	146796055	146833529	non-DE
ENSMUSG00000037111	0.472421	5.84349	9.0879	0.00257307	0.0120272	Setd7	3	-1	51515319	51560879	non-DE
ENSMUSG00000032854	0.472408	1.61085	3.25486	0.071212	0.152109	Ugt8a	3	-1	125865271	125938619	non-DE
ENSMUSG00000041734	0.472372	6.53926	25.9466	3.50984e-07	1.94562e-05	Kirrel	3	-1	87078593	87174747	non-DE
ENSMUSG00000019124	0.472244	4.3911	8.20081	0.00418716	0.0174239	Scrn1	6	-1	54501173	54566489	non-DE
ENSMUSG00000046139	0.47221	5.63437	15.6371	7.67329e-05	0.000892355	Patl1	19	1	11912399	11945096	non-DE
ENSMUSG00000029771	0.471967	1.32325	2.78002	0.0954468	0.189187	Irf5	6	1	29526625	29541871	non-DE
ENSMUSG00000041762	0.471926	1.22435	3.4304	0.0640067	0.140221	Gpr155	2	-1	73341506	73386572	non-DE
ENSMUSG00000010453	0.471747	6.20238	18.6354	1.58251e-05	0.000291803	Kansl3	1	-1	36335730	36369181	non-DE
ENSMUSG00000024622	0.471747	5.36906	15.2445	9.44511e-05	0.00104175	Hmgxb3	18	-1	61131279	61177050	non-DE
ENSMUSG00000043556	0.471697	2.71227	4.87404	0.0272637	0.0730496	Fbxl7	15	-1	26540459	26895580	non-DE
ENSMUSG00000043183	0.471668	4.6162	13.5677	0.000230109	0.00198733	Simc1	13	1	54503779	54551290	non-DE
ENSMUSG00000040276	0.47156	1.80331	3.86344	0.049349	0.115227	Pacsin1	17	1	27655509	27711482	non-DE
ENSMUSG00000020948	0.471395	4.29514	7.54473	0.00601857	0.0231687	Klhl28	12	-1	64938833	64965534	non-DE
ENSMUSG00000047496	0.471285	1.83905	3.1831	0.0744034	0.157376	Rnf152	1	-1	105276914	105356710	non-DE
ENSMUSG00000046591	0.471017	5.65371	13.8766	0.000195214	0.00176862	Ticrr	7	1	79660196	79698148	non-DE
ENSMUSG00000048763	0.470903	3.23047	5.59104	0.0180526	0.0533662	Hoxb3	11	1	96323326	96347930	non-DE
ENSMUSG00000078851	0.470681	1.92022	4.44377	0.0350289	0.0886637	Hist3h2a	11	1	58954685	58956830	non-DE
ENSMUSG00000031596	0.470431	3.68073	5.97812	0.0144844	0.0451191	Slc7a2	8	1	40862396	40922308	non-DE
ENSMUSG00000037646	0.470427	5.06487	7.01295	0.00809221	0.0289886	Vps13b	15	1	35371160	35931229	non-DE
ENSMUSG00000024472	0.4703	7.35774	13.8964	0.000193173	0.00176186	Dcp2	18	1	44380502	44424969	non-DE
ENSMUSG00000004952	0.470299	0.80933	2.4953	0.114187	0.216644	Rasa4	5	1	136083916	136111860	non-DE
ENSMUSG00000038914	0.470126	6.55824	20.4776	6.03328e-06	0.00015	Dido1	2	-1	180657964	180709999	non-DE
ENSMUSG00000025880	0.470076	3.8681	5.96652	0.01458	0.0453394	Smad7	18	1	75367529	75395935	non-DE
ENSMUSG00000030283	0.469981	4.3431	6.79199	0.0091568	0.0317876	St8sia1	6	-1	142821545	142964452	non-DE
ENSMUSG00000053641	0.469856	4.28079	6.8681	0.00877478	0.0308219	Dennd4a	9	1	64811340	64919667	non-DE
ENSMUSG00000039114	0.469538	1.06485	0.887893	0.346049	0.487694	Nrn1	13	-1	36725361	36735131	non-DE
ENSMUSG00000047767	0.469459	2.53021	5.9848	0.0144297	0.0450123	Atg16l2	7	-1	101263034	101302251	non-DE
[truncated: 12,969 more rows]

## Sheet: matdel_E14.5pl_MMTV_totDE
Supplementary file 2b. Differential expression (non-split counts) in male E14.5 B6Cast embryonic placentae, Smchd1 matΔ vs wt (MMTV-Cre). A gene is called differentially expressed if the q-value is below 0.05 and the fold change is greater than 2.
ensembl_gene_id	logFC	logCPM	LR	PValue	FDR	mgi_symbol	chromosome_name	strand	start_position	end_position	status
ENSMUSG00000091694	2.23157	0.0253536	65.345	6.28695e-16	2.96367e-12	Apol11b	15	-1	77633946	77643286	DE
ENSMUSG00000079491	1.99042	0.285391	28.3006	1.03865e-07	1.79129e-05	H2-T10	17	-1	36115876	36121465	DE
ENSMUSG00000029437	1.40726	-0.357701	11.7235	0.00061716	0.00739025	Il31	5	-1	123480157	123489489	DE
ENSMUSG00000078249	1.29745	3.28412	27.7995	1.34563e-07	2.23881e-05	Hmga1b	11	1	120762794	120764419	DE
ENSMUSG00000026389	1.12502	5.61298	32.4727	1.20881e-08	3.88521e-06	Steap3	1	-1	120190757	120272705	DE
ENSMUSG00000043110	1.11693	5.0791	67.3003	2.33143e-16	1.64855e-12	Lrrn4	2	-1	132868305	132880891	DE
ENSMUSG00000106028	1.08096	1.56215	36.68	1.39203e-09	7.03073e-07	Gm8493	5	-1	109551892	109554156	DE
ENSMUSG00000033618	1.06076	0.553873	29.7268	4.97429e-08	9.25611e-06	Map3k13	16	1	21794346	21933439	DE
ENSMUSG00000007209	1.04896	2.74233	7.55632	0.00598	0.0322906	Ceacam9	7	1	16721929	16726132	DE
ENSMUSG00000010064	1.04215	2.16734	19.8276	8.47493e-06	0.000430029	Slc38a3	9	-1	107650634	107669530	DE
ENSMUSG00000063430	1.03116	4.18791	30.6935	3.02176e-08	7.19647e-06	Wscd2	5	1	113490333	113589725	DE
ENSMUSG00000031891	1.00927	5.38036	15.4588	8.43221e-05	0.00197123	Hsd11b2	8	1	105518755	105523988	DE
ENSMUSG00000035509	-1.0006	2.67751	27.0405	1.99239e-07	2.83091e-05	Fbxl21	13	1	56522472	56537898	DE
ENSMUSG00000106734	-1.00404	0.125747	11.0517	0.000886071	0.00926835	Gm20559	6	-1	3333194	3346128	DE
ENSMUSG00000086306	-1.00563	0.575359	25.4734	4.48528e-07	5.0342e-05	Gm11754	11	-1	119106328	119111425	DE
ENSMUSG00000082321	-1.00596	4.74867	17.8209	2.42705e-05	0.000899709	Gm14253	2	-1	156347202	156347840	DE
ENSMUSG00000074813	-1.00623	1.52639	15.4729	8.36981e-05	0.00197123	Gm14005	2	-1	128178319	128502765	DE
ENSMUSG00000078193	-1.00653	4.93019	14.3818	0.000149235	0.00274803	Gm2000	1	1	156366040	156366484	DE
ENSMUSG00000062006	-1.00672	8.88631	17.1561	3.44295e-05	0.00113762	Rpl34	3	-1	130726831	130730398	DE
ENSMUSG00000081100	-1.00839	1.07336	14.9565	0.000110017	0.00227781	Gm14630	X	-1	57631709	57631954	DE
ENSMUSG00000020526	-1.00842	5.32073	21.3804	3.76608e-06	0.000246574	Znhit3	11	-1	84910950	84916366	DE
ENSMUSG00000075486	-1.00991	6.43072	27.1024	1.92954e-07	2.83091e-05	Commd6	14	-1	101632981	101640686	DE
ENSMUSG00000047965	-1.01287	5.82537	12.7256	0.000360685	0.00508554	Rpl9-ps7	2	1	70458982	70459560	DE
ENSMUSG00000060143	-1.01628	6.01661	12.3271	0.000446441	0.00587855	Gm10076	14	1	105681828	105682211	DE
ENSMUSG00000085395	-1.01757	0.83188	9.51961	0.00203288	0.0159363	Gm13056	4	1	141278439	141279794	DE
ENSMUSG00000047215	-1.01846	9.79975	16.1414	5.87861e-05	0.00152584	Rpl9	5	-1	65388364	65391444	DE
ENSMUSG00000074874	-1.0187	2.04052	21.6622	3.25138e-06	0.000223209	Ctla2b	13	-1	60895350	60897447	DE
ENSMUSG00000095362	-1.01895	4.74168	20.9058	4.82431e-06	0.000297453	Gm14325	2	-1	177831791	177840336	DE
ENSMUSG00000097617	-1.01939	1.07392	11.2242	0.000807368	0.00877412	Gm10687	9	-1	44122186	44134485	DE
ENSMUSG00000021905	-1.01975	5.53999	20.7892	5.12715e-06	0.000307238	Dph3	14	-1	32080566	32085729	DE
ENSMUSG00000059534	-1.02024	7.26913	20.0479	7.55279e-06	0.000401547	Uqcr10	11	-1	4701973	4704342	DE
ENSMUSG00000088609	-1.0205	6.07372	8.94375	0.0027842	0.0194536	Gm24187	13	-1	9834469	9834525	DE
ENSMUSG00000040759	-1.02057	1.75064	23.3954	1.31892e-06	0.000109077	Cmtm5	14	1	54936261	54939274	DE
ENSMUSG00000082475	-1.02083	3.50007	12.848	0.000337833	0.00486521	Gm7206	14	1	45704536	45713723	DE
ENSMUSG00000041620	-1.02111	0.932791	6.72376	0.00951368	0.0443888	Mmp1b	9	-1	7368239	7388047	DE
ENSMUSG00000032067	-1.022	5.34447	18.3309	1.85673e-05	0.000751092	Pts	9	-1	50521617	50528724	DE
ENSMUSG00000025893	-1.02266	2.66327	16.1313	5.90986e-05	0.00152792	Kbtbd3	9	1	4309833	4331732	DE
ENSMUSG00000055963	-1.02385	3.84113	19.8725	8.27808e-06	0.000425704	Triqk	4	1	12906838	12983553	DE
ENSMUSG00000070271	-1.02453	2.14849	13.0015	0.000311242	0.00461866	Gm13268	2	-1	14626889	14627321	DE
ENSMUSG00000100104	-1.02533	1.23274	12.8715	0.000333624	0.00481439	Gm5644	X	-1	145601837	145602301	DE
ENSMUSG00000084957	-1.02603	4.79256	20.8445	4.9812e-06	0.000302335	Bbip1	19	-1	53929861	53944627	DE
ENSMUSG00000067344	-1.0271	2.67843	15.1631	9.86139e-05	0.00216217	Rps25-ps1	6	1	145266400	145266777	DE
ENSMUSG00000035121	-1.02753	0.738746	27.7729	1.36421e-07	2.24333e-05	Neil2	14	-1	63182443	63193856	DE
ENSMUSG00000029019	-1.02801	1.90874	9.73536	0.00180756	0.0148576	Nppb	4	1	147985788	147987205	DE
ENSMUSG00000008668	-1.02817	9.15911	15.99	6.36772e-05	0.00161964	Rps18	17	-1	33951999	33956001	DE
ENSMUSG00000097277	-1.02909	3.35905	15.8259	6.94462e-05	0.00171677	2900076A07Rik	7	1	81523550	81531498	DE
ENSMUSG00000085156	-1.02922	2.25067	15.42	8.60737e-05	0.0019825	Snhg15	11	-1	6525591	6528760	DE
ENSMUSG00000027835	-1.03082	7.0443	18.9299	1.35614e-05	0.000585549	Pdcd10	3	-1	75516490	75556856	DE
ENSMUSG00000067058	-1.03161	5.18925	18.0682	2.13128e-05	0.00082577	Rps15a-ps5	5	-1	105797321	105797713	DE
ENSMUSG00000085114	-1.03227	6.69938	22.5516	2.04576e-06	0.000154712	1600025M17Rik	X	1	56317608	56320664	DE
ENSMUSG00000096001	-1.03427	1.65312	13.4862	0.000240319	0.0038841	2610528A11Rik	14	-1	37102140	37114022	DE
ENSMUSG00000050621	-1.03534	4.72794	15.4215	8.60057e-05	0.0019825	Rps27rt	9	-1	114982366	114982739	DE
ENSMUSG00000024479	-1.03538	1.48757	14.4777	0.000141827	0.00264957	Mal2	15	1	54571192	54602847	DE
ENSMUSG00000078887	-1.03699	2.24431	14.5727	0.000134856	0.00258418	Gm6710	2	1	175869219	175881248	DE
ENSMUSG00000087687	-1.04034	4.74924	18.2518	1.9354e-05	0.000773265	Pet100	8	1	3621548	3625848	DE
ENSMUSG00000083757	-1.04105	2.06667	16.897	3.94637e-05	0.00121855	Rps15a-ps4	4	-1	132219988	132220489	DE
ENSMUSG00000062456	-1.04176	5.67338	16.9866	3.76437e-05	0.00118039	Rpl9-ps6	19	-1	32465865	32466578	DE
ENSMUSG00000019909	-1.04319	1.9117	15.3655	8.859e-05	0.00201745	Fam162b	10	-1	51585416	51590517	DE
ENSMUSG00000079428	-1.04393	2.61867	20.9005	4.83766e-06	0.000297453	Tceal7	X	1	136214779	136226100	DE
ENSMUSG00000036781	-1.04817	7.77718	17.1023	3.54185e-05	0.00115027	Rps27l	9	1	66946086	66949516	DE
ENSMUSG00000114432	-1.04825	1.95508	15.3934	8.72937e-05	0.00199287	Gm49391	13	-1	60895350	60936571	DE
ENSMUSG00000084314	-1.05004	2.74607	14.9484	0.000110492	0.00227781	Rps15a-ps3	4	1	150847113	150847507	DE
ENSMUSG00000021187	-1.05072	1.23272	26.319	2.89421e-07	3.55912e-05	Tc2n	12	-1	101645443	101718523	DE
ENSMUSG00000103840	-1.05131	-0.106194	6.63906	0.00997666	0.045834	1700040K01Rik	1	1	152936604	152937041	DE
ENSMUSG00000095526	-1.05151	5.65145	16.6812	4.42173e-05	0.00129935	Gm10243	6	1	48523518	48523850	DE
ENSMUSG00000057195	-1.05244	11.292	30.1815	3.93435e-08	8.06371e-06	Ceacam13	7	1	18009889	18019221	DE
ENSMUSG00000062284	-1.05287	1.6721	6.66077	0.00985583	0.0455048	Gm6030	16	1	45205100	45205489	DE
ENSMUSG00000090733	-1.05475	9.18091	18.1199	2.07422e-05	0.000808087	Rps27	3	-1	90212522	90213651	DE
ENSMUSG00000021346	-1.05482	11.6411	53.0645	3.22775e-13	1.14117e-09	Prl8a8	13	-1	27506968	27513217	DE
ENSMUSG00000063754	-1.05609	2.12307	13.7533	0.000208453	0.00348457	Gm10136	19	-1	29003408	29003842	DE
ENSMUSG00000078861	-1.05788	4.22777	15.998	6.34087e-05	0.00161572	Zfp931	2	-1	178067695	178078476	DE
ENSMUSG00000114053	-1.05807	2.39826	11.9463	0.000547561	0.00681656	Gm35330	13	-1	5539279	5724510	DE
ENSMUSG00000095847	-1.05835	2.93405	14.3076	0.000155233	0.00283632	Gm5451	13	1	66874081	66874659	DE
ENSMUSG00000008822	-1.06023	3.57088	18.9271	1.35808e-05	0.000585549	Acyp1	12	-1	85272398	85288438	DE
ENSMUSG00000096842	-1.06297	3.55774	14.4217	0.000146109	0.002701	Gm10736	13	-1	111593534	111593611	DE
ENSMUSG00000006490	-1.06477	13.533	29.9281	4.48363e-08	8.65149e-06	Prl8a9	13	-1	27557995	27564606	DE
ENSMUSG00000039016	-1.06486	5.63182	22.4177	2.19345e-06	0.000163262	Timm8b	9	1	50603910	50605320	DE
ENSMUSG00000079186	-1.07039	4.57931	15.4738	8.3659e-05	0.00197123	Gzmc	14	-1	56231441	56234656	DE
ENSMUSG00000109118	-1.0721	0.0375201	11.8314	0.000582399	0.00709413	Gm32031	7	1	47008083	47009008	DE
ENSMUSG00000081087	-1.07314	3.30776	17.4103	3.01187e-05	0.00105237	Rps15a-ps7	2	-1	152185291	152185682	DE
ENSMUSG00000060636	-1.07347	8.05863	17.6776	2.61693e-05	0.000946513	Rpl35a	16	1	33056453	33060189	DE
ENSMUSG00000022820	-1.0755	5.75849	20.2312	6.86261e-06	0.000376167	Ndufb4	16	-1	37647170	37654453	DE
ENSMUSG00000062328	-1.07813	6.78761	17.5454	2.80531e-05	0.00100184	Rpl17	18	1	74998558	75003381	DE
ENSMUSG00000070394	-1.08004	5.246	18.4599	1.7352e-05	0.000713348	Tmem256	11	1	69838514	69839618	DE
ENSMUSG00000060726	-1.08069	2.39981	18.3875	1.80236e-05	0.000736674	Tmsb15a	X	-1	135718667	135725261	DE
ENSMUSG00000087497	-1.08153	2.90658	20.0292	7.62693e-06	0.00040397	2810001G20Rik	11	1	64079484	64083259	DE
ENSMUSG00000094974	-1.08187	0.341424	11.8338	0.000581649	0.0070911	Rps19-ps2	14	1	52902793	52903230	DE
ENSMUSG00000085794	-1.08317	0.476382	22.7364	1.85819e-06	0.000142955	Vax2os	6	-1	83692806	83712201	DE
ENSMUSG00000080896	-1.08382	3.48084	16.1893	5.73161e-05	0.00150943	Gm14567	X	1	38969817	38969990	DE
ENSMUSG00000041959	-1.08676	7.95202	22.6135	1.98083e-06	0.000150607	S100a10	3	1	93555080	93564643	DE
ENSMUSG00000086583	-1.08697	7.04044	17.4019	3.02519e-05	0.00105237	Gm15500	7	-1	114705217	114706235	DE
ENSMUSG00000062997	-1.08702	8.61462	19.5389	9.85699e-06	0.000472534	Rpl35	2	-1	39001580	39005624	DE
ENSMUSG00000087485	-1.089	0.788909	26.5841	2.52307e-07	3.30382e-05	Gm13383	2	-1	6255946	6257266	DE
ENSMUSG00000108414	-1.08978	4.63383	16.5309	4.78644e-05	0.0013484	Snhg1	19	1	8723475	8726443	DE
ENSMUSG00000072594	-1.08994	0.139987	13.5445	0.000232972	0.00377907	Gm16439	14	1	44596665	44597228	DE
ENSMUSG00000100131	-1.09042	3.46012	13.2271	0.000275929	0.00426062	Gm28439	1	-1	24611535	24612410	DE
ENSMUSG00000110058	-1.09152	-0.0466821	30.4931	3.35051e-08	7.51228e-06	Gm5907	8	1	13986090	14003561	DE
ENSMUSG00000024846	-1.09184	1.44908	31.7037	1.79576e-08	4.97953e-06	Cst6	19	-1	5344705	5349574	DE
ENSMUSG00000009927	-1.09326	9.56805	20.36	6.41585e-06	0.000356976	Rps25	9	1	44407139	44410427	DE
ENSMUSG00000103979	-1.09452	1.43076	16.6352	4.53033e-05	0.00131827	Gm20305	1	-1	180854282	180854458	DE
ENSMUSG00000033688	-1.09558	2.2502	20.1392	7.2005e-06	0.000388662	1300017J02Rik	9	-1	103250521	103305082	DE
ENSMUSG00000080824	-1.09782	2.92297	19.0132	1.29815e-05	0.000572235	Gm9001	6	-1	75782358	75782756	DE
ENSMUSG00000073421	-1.09846	0.69923	25.9984	3.41705e-07	4.027e-05	H2-Ab1	17	1	34257689	34269419	DE
ENSMUSG00000094989	-1.09964	4.97958	19.8256	8.48388e-06	0.000430029	Rpl9-ps4	13	-1	72454762	72455340	DE
ENSMUSG00000081562	-1.09986	1.29791	10.6609	0.00109426	0.010669	Gm11575	1	-1	60522839	60523066	DE
ENSMUSG00000051116	-1.09988	2.85711	17.6059	2.71745e-05	0.000975384	Gm8121	5	1	57608569	57609067	DE
ENSMUSG00000058558	-1.10027	9.9903	20.6215	5.59638e-06	0.000327041	Rpl5	5	1	107900502	107909005	DE
ENSMUSG00000113902	-1.10166	6.28304	19.6649	9.22825e-06	0.000454724	Ndufb1-ps	12	-1	101968090	101977068	DE
ENSMUSG00000060459	-1.10186	2.70016	21.5038	3.53129e-06	0.000235564	Kng2	16	-1	22985854	23029482	DE
ENSMUSG00000084830	-1.10206	5.71386	19.026	1.28948e-05	0.000571654	Gm14539	X	-1	20581141	20581314	DE
ENSMUSG00000004655	-1.10637	1.99909	8.01355	0.00464285	0.027461	Aqp1	6	1	55336432	55348555	DE
ENSMUSG00000086629	-1.10643	2.65529	21.6806	3.2204e-06	0.000223209	2810403D21Rik	X	1	108833800	108974906	DE
ENSMUSG00000071528	-1.10784	6.84633	19.1327	1.21936e-05	0.00055407	Usmg5	19	-1	47083464	47090647	DE
ENSMUSG00000094955	-1.10806	2.18247	15.3115	9.1162e-05	0.00206274	Gm3699	10	-1	43456427	43456501	DE
ENSMUSG00000017922	-1.1101	6.91178	25.3367	4.81454e-07	5.3612e-05	Prl3c1	13	1	27196659	27203749	DE
ENSMUSG00000016194	-1.11025	5.22051	21.8371	2.96809e-06	0.000211994	Hsd11b1	1	-1	193221634	193264075	DE
ENSMUSG00000042670	-1.1104	5.93182	19.128	1.22239e-05	0.00055407	Immp1l	2	1	105904638	105965558	DE
ENSMUSG00000089889	-1.11043	1.9477	19.1154	1.23046e-05	0.000555949	0610040B10Rik	5	1	143329247	143332704	DE
ENSMUSG00000073888	-1.11458	4.39049	27.4801	1.58722e-07	2.58006e-05	Ccl27a	4	-1	41769467	41774247	DE
ENSMUSG00000034918	-1.11704	0.493752	8.10704	0.00440937	0.0265612	Cdhr2	13	1	54701461	54736662	DE
ENSMUSG00000066809	-1.11781	1.14725	7.28738	0.00694405	0.035752	Gm10180	9	-1	25101404	25101481	DE
ENSMUSG00000113948	-1.118	4.59913	20.503	5.95374e-06	0.000340882	Rpl17-ps3	12	1	67510756	67511311	DE
ENSMUSG00000030717	-1.11833	0.106658	24.5705	7.16412e-07	6.98724e-05	Nupr1	7	-1	126623249	126630861	DE
ENSMUSG00000045996	-1.11937	5.29201	19.3741	1.07452e-05	0.000496596	Polr2k	15	1	36174010	36177010	DE
ENSMUSG00000039221	-1.12127	8.24286	18.3287	1.85888e-05	0.000751092	Rpl22l1	3	1	28805436	28807424	DE
ENSMUSG00000086429	-1.12154	3.01228	9.15347	0.00248247	0.0179911	Gt(ROSA)26Sor	6	-1	113067428	113077333	DE
ENSMUSG00000064360	-1.12463	2.76394	11.673	0.000634148	0.00751099	mt-Nd3	MT	1	9459	9806	DE
ENSMUSG00000019756	-1.1273	6.72588	8.34061	0.00387687	0.0242488	Prl8a1	13	-1	27573922	27582171	DE
ENSMUSG00000023236	-1.12801	0.682822	8.56641	0.00342421	0.0222505	Scg5	2	-1	113776362	113829121	DE
ENSMUSG00000081895	-1.12864	6.91576	16.6529	4.48806e-05	0.00130866	Rpl17-ps10	7	-1	72648757	72649311	DE
ENSMUSG00000091383	-1.13076	1.97812	17.1426	3.46758e-05	0.00113778	Hist1h2al	13	-1	51202727	51203065	DE
ENSMUSG00000044716	-1.13161	-0.212697	8.28301	0.00400177	0.0248542	Dok7	5	1	35056766	35087839	DE
ENSMUSG00000027375	-1.13521	0.735695	25.7883	3.81e-07	4.34556e-05	Mal	2	-1	127633226	127656695	DE
ENSMUSG00000102123	-1.13715	0.0173994	19.5882	9.60615e-06	0.000463371	Gm4319	1	-1	72107155	72122001	DE
ENSMUSG00000060550	-1.1394	1.43962	8.5933	0.00337403	0.0219893	H2-Q7	17	1	35439155	35443773	DE
ENSMUSG00000081855	-1.1395	5.92808	18.9612	1.33403e-05	0.000584039	Rpl17-ps5	5	-1	22612628	22613182	DE
ENSMUSG00000024208	-1.14141	5.27945	23.367	1.33858e-06	0.00011006	Uqcc2	17	-1	27122663	27133916	DE
ENSMUSG00000113346	-1.14313	3.18411	25.0085	5.70791e-07	5.97749e-05	Eprn	13	-1	73344665	73347384	DE
ENSMUSG00000001289	-1.1444	7.50389	21.5606	3.42819e-06	0.00023025	Pfdn5	15	1	102326116	102331873	DE
ENSMUSG00000106918	-1.14498	5.39114	26.2005	3.07743e-07	3.68822e-05	Mrpl33	5	1	31596935	31664384	DE
ENSMUSG00000113186	-1.14515	0.668501	16.7725	4.21393e-05	0.00127322	A330076C08Rik	13	-1	44185760	44216487	DE
ENSMUSG00000036446	-1.14573	4.20781	8.50664	0.00353852	0.0227459	Lum	10	1	97565128	97572703	DE
ENSMUSG00000081214	-1.14605	0.605569	11.2027	0.000816776	0.00881072	Rpl35a-ps2	1	-1	181241988	181242320	DE
ENSMUSG00000048473	-1.14619	2.60856	13.9201	0.000190751	0.00327017	Sult6b2	6	-1	142785204	142804502	DE
ENSMUSG00000060613	-1.14681	0.479273	34.8585	3.54551e-09	1.35515e-06	Cyp2c70	19	-1	40153353	40187333	DE
ENSMUSG00000030157	-1.14818	3.80056	17.7606	2.50513e-05	0.000920195	Clec2d	6	1	129180615	129186534	DE
ENSMUSG00000099632	-1.14855	0.407304	16.9821	3.77334e-05	0.00118059	2900093K20Rik	2	1	163419795	163420361	DE
ENSMUSG00000073616	-1.1494	6.48327	22.8075	1.79061e-06	0.000139905	Cops9	1	-1	92637145	92641985	DE
ENSMUSG00000110057	-1.15148	3.47325	21.7058	3.17828e-06	0.000221415	Gm2225	8	-1	78486034	78486410	DE
ENSMUSG00000063328	-1.15371	0.803326	7.76229	0.00533483	0.0301378	Gm9396	3	1	130068412	130068978	DE
ENSMUSG00000022512	-1.15399	1.08423	28.111	1.14554e-07	1.95183e-05	Cldn1	16	-1	26356642	26371841	DE
ENSMUSG00000020460	-1.15568	9.32941	22.449	2.158e-06	0.000162332	Rps27a	11	-1	29545846	29548109	DE
ENSMUSG00000105143	-1.1578	3.08729	18.0542	2.14709e-05	0.000827362	Gm8069	5	-1	54651968	54652121	DE
ENSMUSG00000016252	-1.15813	7.72002	20.4795	6.02719e-06	0.000342315	Atp5e	2	-1	174461072	174464105	DE
ENSMUSG00000060923	-1.16301	1.52993	16.476	4.92691e-05	0.00137012	Acyp2	11	-1	30505991	30649587	DE
ENSMUSG00000091412	-1.16501	0.783608	24.172	8.8102e-07	8.19697e-05	Gm2895	15	1	66969323	67013039	DE
ENSMUSG00000008540	-1.16738	5.16393	21.4055	3.71712e-06	0.000245642	Mgst1	6	1	138140316	138156755	DE
ENSMUSG00000032246	-1.16906	4.11851	25.1833	5.21314e-07	5.62781e-05	Calml4	9	1	62858080	62875921	DE
ENSMUSG00000059256	-1.17026	6.16038	18.8067	1.44654e-05	0.000616176	Gzmd	14	-1	56129556	56132608	DE
ENSMUSG00000051747	-1.17735	0.113743	17.4012	3.02633e-05	0.00105237	Ttn	2	-1	76703980	76982547	DE
ENSMUSG00000022013	-1.1775	5.64192	23.7154	1.11686e-06	9.63088e-05	Dnajc15	14	-1	77820681	77875125	DE
ENSMUSG00000111964	-1.17868	1.92916	8.99088	0.0027133	0.0191093	Gm8942	10	1	115269978	115270377	DE
ENSMUSG00000078713	-1.18245	6.98025	25.7726	3.84101e-07	4.34556e-05	Tomm5	4	-1	45105208	45108114	DE
ENSMUSG00000078867	-1.18651	3.02667	17.7156	2.56511e-05	0.000937358	Gm14418	2	-1	177387124	177398320	DE
ENSMUSG00000097318	-1.1875	1.81569	19.3777	1.07254e-05	0.000496596	1700007L15Rik	16	-1	33379854	33380727	DE
ENSMUSG00000023995	-1.19223	-0.15022	14.3675	0.000150374	0.00276539	Tspo2	17	-1	48447907	48451522	DE
ENSMUSG00000112474	-1.19712	3.11713	18.0145	2.19233e-05	0.000840214	Gm46209	10	1	7458356	7458908	DE
ENSMUSG00000066760	-1.20087	10.6877	30.4174	3.48392e-08	7.57994e-06	Psg16	7	1	17074040	17133450	DE
ENSMUSG00000101111	-1.20132	3.50294	14.5581	0.0001359	0.00259268	Gm28437	1	-1	24613189	24613971	DE
ENSMUSG00000099253	-1.20171	0.970444	7.7082	0.00549704	0.0306663	Gm7863	9	1	72128587	72129391	DE
ENSMUSG00000075602	-1.20323	3.1783	10.8636	0.000980735	0.00994946	Ly6a	15	-1	74994877	74998031	DE
ENSMUSG00000020469	-1.20366	0.556359	20.9034	4.83037e-06	0.000297453	Myl7	11	-1	5896637	5898782	DE
ENSMUSG00000083992	-1.20367	5.74333	20.068	7.47376e-06	0.000398845	Gm11478	11	-1	86630428	86631026	DE
ENSMUSG00000031125	-1.2079	0.39535	12.5305	0.000400362	0.00546517	3830403N18Rik	X	1	56136572	56153498	DE
ENSMUSG00000082064	-1.21051	1.65653	15.0205	0.000106348	0.00224809	Rpl5-ps2	2	1	154703809	154704699	DE
ENSMUSG00000099707	-1.2118	1.74122	18.9108	1.36973e-05	0.000588774	Gm8883	1	1	71888112	71891204	DE
ENSMUSG00000090136	-1.21308	5.39845	21.5839	3.38692e-06	0.00023025	Gm10177	9	1	37252922	37253365	DE
ENSMUSG00000041046	-1.21775	2.77416	14.9601	0.00010981	0.00227781	Ramp3	11	1	6658521	6677475	DE
ENSMUSG00000027229	-1.21782	0.369322	12.9345	0.000322584	0.00469955	Terb2	2	1	122186272	122206397	DE
ENSMUSG00000067212	-1.21807	4.80001	40.8525	1.64166e-10	1.42664e-07	H2-T23	17	-1	36029773	36032855	DE
ENSMUSG00000033834	-1.22093	14.927	35.6477	2.36431e-09	9.95634e-07	Tpbpa	13	-1	60938492	60941984	DE
ENSMUSG00000046899	-1.22164	13.0631	28.8742	7.72344e-08	1.36531e-05	Prl7a2	13	-1	27658584	27668036	DE
ENSMUSG00000073386	-1.22532	1.49737	23.1095	1.53033e-06	0.000122271	9830107B12Rik	17	-1	48125605	48146268	DE
ENSMUSG00000056071	-1.22872	2.85843	11.1501	0.000840265	0.00896833	S100a9	3	-1	90692632	90695721	DE
ENSMUSG00000100215	-1.23159	1.64191	16.841	4.06461e-05	0.00124539	Gm8292	1	1	55335401	55335796	DE
ENSMUSG00000034783	-1.23229	0.504504	40.5498	1.91671e-10	1.42664e-07	Cd207	6	-1	83671215	83677857	DE
ENSMUSG00000029322	-1.23433	9.55439	9.70531	0.00183736	0.0150109	Plac8	5	-1	100553725	100572245	DE
ENSMUSG00000074578	-1.23524	4.87385	18.5527	1.65275e-05	0.000685429	Zfas1	2	1	167062934	167065862	DE
ENSMUSG00000056498	-1.23728	1.04256	18.3551	1.83323e-05	0.000747134	Tmem154	3	1	84666192	84704575	DE
ENSMUSG00000097113	-1.23864	1.66075	27.1455	1.88701e-07	2.83091e-05	Gm19705	1	1	136670769	136690804	DE
ENSMUSG00000058838	-1.23892	6.39452	10.409	0.00125406	0.0117139	Rps27a-ps2	9	1	83409660	83410126	DE
ENSMUSG00000078974	-1.24486	7.26448	24.1262	9.0225e-07	8.33962e-05	Sec61g	11	-1	16500530	16508484	DE
ENSMUSG00000003355	-1.24658	5.72071	39.5191	3.24873e-10	2.18779e-07	Fkbp11	15	-1	98724366	98728198	DE
ENSMUSG00000038543	-1.24792	3.03559	17.2438	3.28767e-05	0.00110437	BC028528	3	-1	95883954	95892005	DE
ENSMUSG00000081810	-1.25376	4.14005	17.629	2.68462e-05	0.000966053	Gm11878	4	1	22519628	22520027	DE
ENSMUSG00000090266	-1.25569	4.63189	25.1865	5.20465e-07	5.62781e-05	Mettl23	11	1	116843278	116854263	DE
ENSMUSG00000098181	-1.25594	1.44248	14.9349	0.000111288	0.00228755	Rps12-ps24	8	1	36025753	36026133	DE
ENSMUSG00000026208	-1.25703	3.56161	6.94144	0.00842211	0.0410517	Des	1	1	75360329	75368579	DE
ENSMUSG00000087165	-1.25794	1.90322	25.8455	3.69866e-07	4.28741e-05	2010001A14Rik	11	-1	57795499	57801417	DE
ENSMUSG00000070692	-1.26119	6.02035	21.6641	3.24808e-06	0.000223209	Rps12-ps10	2	1	122219993	122220391	DE
ENSMUSG00000025290	-1.26148	10.1406	20.7953	5.11085e-06	0.000307238	Rps24	14	1	24487125	24496959	DE
ENSMUSG00000060967	-1.26704	4.02867	23.3988	1.31664e-06	0.000109077	Etd	X	1	53434918	53443576	DE
ENSMUSG00000064373	-1.26801	8.62372	20.2074	6.94846e-06	0.000379402	Selenop	15	1	3268547	3280508	DE
ENSMUSG00000061983	-1.27012	8.50194	22.0327	2.68048e-06	0.000194466	Rps12	10	-1	23785183	23787275	DE
ENSMUSG00000029102	-1.27411	-0.108834	12.0384	0.000521151	0.00656579	Hgfac	5	1	35041509	35048461	DE
ENSMUSG00000079018	-1.27419	3.20906	16.4907	4.88881e-05	0.00136635	Ly6c1	15	-1	75044018	75048830	DE
ENSMUSG00000085457	-1.27589	0.410187	20.1431	7.18586e-06	0.000388662	1110046J04Rik	13	1	33935567	33960181	DE
ENSMUSG00000067038	-1.28343	4.38324	20.5051	5.94714e-06	0.000340882	Rps12-ps3	19	1	59322290	59322783	DE
ENSMUSG00000062705	-1.28472	13.649	45.1227	1.85071e-11	3.27158e-08	Tpbpb	13	-1	60901188	60904880	DE
ENSMUSG00000052217	-1.28605	0.958874	16.3543	5.25362e-05	0.00142878	Hbb-bh1	7	-1	103841637	103843164	DE
ENSMUSG00000109509	-1.29756	3.52604	20.6734	5.44677e-06	0.000320951	Rps12-ps4	7	-1	30484701	30485097	DE
ENSMUSG00000086567	-1.3003	2.57688	14.7448	0.000123088	0.00242651	Gm2830	13	-1	54499705	54500089	DE
ENSMUSG00000032554	-1.30678	2.33449	42.7321	6.27736e-11	7.39787e-08	Trf	9	-1	103204001	103230444	DE
ENSMUSG00000107546	-1.30683	0.515984	25.9092	3.57868e-07	4.18262e-05	Gm20560	6	1	73012043	73020360	DE
ENSMUSG00000027199	-1.31334	3.60136	11.3518	0.000753762	0.00840008	Gatm	2	-1	122594467	122611303	DE
ENSMUSG00000094344	-1.31376	3.08835	8.02006	0.00462621	0.0273969	Gm11942	4	1	32964888	32965232	DE
ENSMUSG00000097503	-1.31437	1.5322	15.0674	0.000103739	0.00222285	3110045C21Rik	1	1	169969409	169972396	DE
ENSMUSG00000083344	-1.31605	1.23643	9.58168	0.00196528	0.015611	Gm7363	7	-1	3983787	3984185	DE
ENSMUSG00000082035	-1.31647	1.63565	8.07681	0.00448353	0.0268685	Rpl17-ps8	X	1	96484859	96485479	DE
ENSMUSG00000018339	-1.32075	6.30936	15.4438	8.49955e-05	0.00197307	Gpx3	11	1	54902453	54910377	DE
ENSMUSG00000044734	-1.3264	0.66558	19.4084	1.0554e-05	0.000494222	Serpinb1a	13	-1	32842092	32851185	DE
ENSMUSG00000031757	-1.33237	0.140668	23.2155	1.44824e-06	0.000117707	Mt4	8	1	94137197	94139031	DE
ENSMUSG00000020698	-1.33449	2.70653	40.2476	2.23725e-10	1.58196e-07	Cct6b	11	-1	82719250	82764321	DE
ENSMUSG00000015441	-1.34036	5.56529	26.3289	2.87942e-07	3.55912e-05	Gzmf	14	-1	56205263	56211417	DE
ENSMUSG00000081049	-1.34142	6.11248	20.8017	5.09373e-06	0.000307238	Rps24-ps3	X	1	79195047	79195448	DE
ENSMUSG00000068396	-1.34473	6.31258	13.7041	0.00021399	0.00353582	Rpl34-ps1	6	1	71124610	71124963	DE
ENSMUSG00000030218	-1.34687	1.3286	7.46521	0.00629026	0.0333922	Mgp	6	-1	136872435	136875823	DE
ENSMUSG00000044424	-1.34824	4.90614	11.6841	0.000630351	0.00747227	Gm9493	19	1	23619749	23620319	DE
ENSMUSG00000030366	-1.35255	11.8804	44.3641	2.7264e-11	4.28408e-08	Ceacam12	7	1	18065929	18077986	DE
ENSMUSG00000114502	-1.35456	2.67896	12.1751	0.000484317	0.00624358	Gm40975	13	1	60955219	60959948	DE
ENSMUSG00000022875	-1.36032	3.57474	24.0386	9.4425e-07	8.61522e-05	Kng1	16	1	23057865	23082078	DE
ENSMUSG00000098234	-1.3634	4.52613	19.6795	9.15772e-06	0.00045337	Snhg6	1	-1	9941959	9944118	DE
ENSMUSG00000064358	-1.36746	3.72161	11.4169	0.000727778	0.00820313	mt-Co3	MT	1	8607	9390	DE
ENSMUSG00000081565	-1.37911	0.363311	11.415	0.000728548	0.00820313	Rps12-ps5	7	1	30263263	30263651	DE
ENSMUSG00000100862	-1.38335	3.72096	11.2592	0.00079228	0.00866544	Gm10925	1	-1	24613974	24614651	DE
ENSMUSG00000042485	-1.39	1.03973	19.0373	1.28188e-05	0.000570957	Mustn1	14	1	30879200	30881610	DE
ENSMUSG00000055093	-1.40349	4.0429	14.887	0.000114147	0.00232938	Gm8430	6	1	122456904	122457374	DE
ENSMUSG00000100865	-1.40447	2.22873	19.4999	1.00603e-05	0.000479035	Gm9320	17	1	70853767	70876312	DE
ENSMUSG00000109745	-1.41095	1.67939	35.6236	2.39369e-09	9.95634e-07	1700018G05Rik	X	1	102928372	102929094	DE
ENSMUSG00000019929	-1.41337	5.61595	10.0174	0.00155068	0.0134621	Dcn	10	1	97479609	97518143	DE
ENSMUSG00000034353	-1.43305	2.6384	30.3477	3.61133e-08	7.62259e-06	Ramp1	1	1	91179822	91225196	DE
ENSMUSG00000040314	-1.43996	0.15277	37.3707	9.7678e-10	5.54546e-07	Ctsg	14	-1	56099881	56102574	DE
ENSMUSG00000021345	-1.48851	7.67016	50.0976	1.46283e-12	3.44789e-09	Prl8a6	13	-1	27432681	27438688	DE
ENSMUSG00000038352	-1.52047	2.02675	27.1363	1.89603e-07	2.83091e-05	Arl5c	11	-1	97989578	97996181	DE
ENSMUSG00000065037	-1.539	0.962141	27.3516	1.69621e-07	2.63603e-05	Rn7sk	9	-1	78175303	78175633	DE
ENSMUSG00000084235	-1.54376	1.92522	19.857	8.3458e-06	0.000427631	Gm15421	5	-1	22528321	22529244	DE
ENSMUSG00000109209	-1.54522	-0.0573223	31.2531	2.26485e-08	5.61921e-06	Gm45104	7	-1	18396516	18400865	DE
ENSMUSG00000022868	-1.56341	0.228304	15.2645	9.34541e-05	0.00208788	Ahsg	16	1	22891277	22899449	DE
ENSMUSG00000053062	-1.57133	1.42513	16.2974	5.41368e-05	0.00146107	Jam2	16	1	84774123	84825928	DE
ENSMUSG00000026228	-1.57826	1.37	17.4274	2.98484e-05	0.00105237	Htr2b	1	-1	86099026	86111970	DE
ENSMUSG00000067219	-1.59121	0.646211	10.4753	0.00120983	0.0114309	Nipal1	5	1	72647795	72671078	DE
ENSMUSG00000062551	-1.59258	3.81863	22.4344	2.17443e-06	0.000162702	Prl2c1	13	1	27849342	27857788	DE
ENSMUSG00000050074	-1.6344	2.3604	10.4954	0.00119674	0.0113358	Spink8	9	1	109812280	109826633	DE
ENSMUSG00000037852	-1.66696	3.10013	11.0946	0.000865809	0.0091171	Cpe	8	-1	64592542	64693054	DE
ENSMUSG00000029082	-1.66812	0.778744	23.9418	9.92941e-07	8.88745e-05	Bst1	5	1	43818885	43843986	DE
ENSMUSG00000069862	-1.67602	0.963802	19.632	9.38841e-06	0.000456257	Rps12-ps9	8	1	123206623	123207021	DE
ENSMUSG00000056116	-1.67905	2.34276	40.6538	1.8173e-10	1.42664e-07	H2-T22	17	-1	36037128	36042747	DE
ENSMUSG00000029664	-1.67941	2.7095	12.3389	0.00044361	0.00585368	Tfpi2	6	-1	3962595	3988919	DE
ENSMUSG00000029811	-1.70665	1.67428	8.7103	0.00316417	0.021034	Aoc1	6	1	48872896	48909188	DE
ENSMUSG00000024653	-1.70734	0.799204	30.4834	3.36729e-08	7.51228e-06	Scgb1a1	19	-1	9083636	9087958	DE
ENSMUSG00000091705	-1.78544	1.16763	27.4228	1.63491e-07	2.59515e-05	H2-Q2	17	1	35342242	35346762	DE
ENSMUSG00000057657	-1.7987	2.14992	26.3574	2.83729e-07	3.55912e-05	Rps18-ps3	8	-1	107262793	107263248	DE
ENSMUSG00000022766	-1.84276	1.64482	30.5755	3.21118e-08	7.44468e-06	Serpind1	16	1	17331371	17343575	DE
ENSMUSG00000044258	-1.86518	7.7934	43.5414	4.1508e-11	5.33642e-08	Ctla2a	13	-1	60934155	60936625	DE
ENSMUSG00000035105	-1.86568	1.21797	7.12475	0.00760272	0.038181	Egln3	12	-1	54178981	54203860	DE
ENSMUSG00000049723	-1.87043	1.04143	34.1826	5.01767e-09	1.81949e-06	Mmp12	9	1	7344381	7369499	DE
ENSMUSG00000029096	-1.95131	3.14035	7.37691	0.00660667	0.0345276	Htra3	5	-1	35652023	35679782	DE
ENSMUSG00000021278	-1.9979	1.00114	16.8892	3.96257e-05	0.00122089	Amn	12	1	111271095	111276426	DE
ENSMUSG00000029816	-2.12477	1.17362	11.3167	0.000768131	0.00849993	Gpnmb	6	1	49036546	49070929	DE
ENSMUSG00000024391	-2.15413	2.70545	28.3121	1.03247e-07	1.79129e-05	Apom	17	-1	35128997	35132050	DE
ENSMUSG00000040147	-2.22604	1.32443	24.9231	5.9664e-07	6.07027e-05	Maob	X	-1	16709282	16817366	DE
ENSMUSG00000030111	-2.26245	2.36946	9.11824	0.00253073	0.0182228	A2m	6	1	121635376	121679227	DE
ENSMUSG00000038883	-2.26571	4.16575	41.5352	1.1577e-10	1.2594e-07	Prl3a1	13	1	27259436	27276667	DE
ENSMUSG00000028111	-2.29352	3.85821	7.82076	0.00516496	0.0294647	Ctsk	3	1	95499256	95509362	DE
ENSMUSG00000056054	-2.46134	3.93488	33.2377	8.1556e-09	2.81309e-06	S100a8	3	1	90668978	90670035	DE
ENSMUSG00000030116	-2.56728	0.835688	14.7882	0.000120285	0.00239251	Mfap5	6	1	122505845	122529290	DE
ENSMUSG00000020609	-2.57067	4.31577	24.6617	6.83295e-07	6.77277e-05	Apob	12	1	7977648	8016835	DE
ENSMUSG00000059412	-2.57928	0.367098	21.5566	3.43536e-06	0.00023025	Fxyd2	9	1	45399669	45410278	DE
ENSMUSG00000063727	-2.66069	2.79042	7.56841	0.00594002	0.032177	Tnfrsf11b	15	-1	54250619	54278484	DE
ENSMUSG00000005681	-2.86809	3.40605	26.7757	2.28489e-07	3.13717e-05	Apoa2	1	1	171225054	171226379	DE
ENSMUSG00000035540	-3.6554	1.48506	36.75	1.34289e-09	7.03073e-07	Gc	5	-1	89417522	89457898	DE
ENSMUSG00000024990	-3.67784	2.8658	30.0616	4.18535e-08	8.33651e-06	Rbp4	19	-1	38116629	38125281	DE
ENSMUSG00000028001	-3.7726	1.05712	27.8753	1.29388e-07	2.17835e-05	Fga	3	1	83026076	83033627	DE
ENSMUSG00000061808	-3.93204	4.43649	32.0797	1.47974e-08	4.45243e-06	Ttr	18	1	20665280	20674321	DE
ENSMUSG00000031980	-4.12695	0.345275	33.6364	6.6439e-09	2.34895e-06	Agt	8	-1	124556534	124569706	DE
ENSMUSG00000033831	-4.14077	1.11433	24.9838	5.78155e-07	5.97749e-05	Fgb	3	-1	83040141	83049863	DE
ENSMUSG00000032080	-4.25886	3.36388	41.3618	1.26507e-10	1.2779e-07	Apoa4	9	1	46240696	46243459	DE
ENSMUSG00000028307	-4.67417	0.891886	30.4649	3.3997e-08	7.51228e-06	Aldob	4	-1	49535995	49549546	DE
ENSMUSG00000032083	-4.76564	5.25791	24.6573	6.84844e-07	6.77277e-05	Apoa1	9	1	46228580	46230466	DE
ENSMUSG00000033860	-4.84191	1.57813	31.7776	1.72877e-08	4.88966e-06	Fgg	3	1	83007724	83015049	DE
ENSMUSG00000029368	-4.88977	1.66064	27.0581	1.97429e-07	2.83091e-05	Alb	5	1	90460897	90476602	DE
ENSMUSG00000058952	-4.95399	1.02661	31.4743	2.02095e-08	5.29266e-06	Cfi	3	1	129835884	129875332	DE
ENSMUSG00000054932	-5.07575	8.97786	26.7121	2.36141e-07	3.21106e-05	Afp	5	1	90490737	90508907	DE
ENSMUSG00000024503	-5.09292	1.80246	32.9121	9.64232e-09	3.23877e-06	Spink1	18	-1	43728082	43737557	DE
ENSMUSG00000026295	-5.13134	3.66039	31.8579	1.65875e-08	4.82797e-06	Spp2	1	1	88406961	88426438	DE
ENSMUSG00000050197	1.45424	0.636688	2.2312	0.135249	0.251108	Rhox13	X	1	38121219	38129967	non-DE
ENSMUSG00000042386	1.32329	0.982385	4.45695	0.0347594	0.102538	Tex13b	X	-1	140808307	140813433	non-DE
ENSMUSG00000039518	0.973054	0.0658211	13.7308	0.000210961	0.00351817	Cdsn	17	1	35552128	35557180	non-DE
ENSMUSG00000025185	0.958955	0.672566	15.0809	0.000102998	0.00221368	Loxl4	19	-1	42593982	42612813	non-DE
ENSMUSG00000042489	0.943175	1.89738	27.4324	1.62682e-07	2.59515e-05	Clspn	4	1	126556935	126593903	non-DE
ENSMUSG00000075707	0.940592	4.4715	14.1917	0.0001651	0.00296675	Dio3	12	1	110279068	110281097	non-DE
ENSMUSG00000029090	0.923857	7.19588	36.3864	1.61828e-09	7.62858e-07	Adgra3	5	-1	49959956	50059006	non-DE
ENSMUSG00000031391	0.917319	0.203375	7.80338	0.00521485	0.0296416	L1cam	X	-1	73853778	73896105	non-DE
ENSMUSG00000052133	0.916255	0.907199	15.1273	0.000100498	0.00218685	Sema5b	16	1	35541145	35664732	non-DE
ENSMUSG00000024008	0.901255	3.16253	11.8008	0.000592051	0.00717462	Cpne5	17	-1	29155556	29238167	non-DE
ENSMUSG00000046618	0.878575	1.11153	4.00435	0.0453829	0.122039	Olfml2a	2	1	38931978	38963753	non-DE
ENSMUSG00000002100	0.877855	2.06673	24.5962	7.06913e-07	6.94247e-05	Mybpc3	2	1	91118144	91136516	non-DE
ENSMUSG00000041805	0.871969	0.668261	10.2134	0.00139422	0.0125711	Pramel1	4	1	143394428	143400160	non-DE
ENSMUSG00000017499	0.865031	1.92934	30.997	2.58428e-08	6.3012e-06	Cdc6	11	1	98907801	98923940	non-DE
ENSMUSG00000070526	0.862677	1.4977	35.8782	2.10048e-09	9.58224e-07	Peg12	7	-1	62461871	62464510	non-DE
ENSMUSG00000034330	0.861536	5.14441	31.3636	2.1395e-08	5.49281e-06	Plcg2	8	1	117498291	117635142	non-DE
ENSMUSG00000030867	0.858007	2.31898	29.9094	4.52701e-08	8.65149e-06	Plk1	7	1	122159439	122169873	non-DE
ENSMUSG00000020701	0.856005	4.17825	4.67862	0.0305403	0.0943841	Tmem132e	11	1	82388900	82446332	non-DE
ENSMUSG00000062007	0.853302	-0.240372	14.5077	0.000139591	0.00262932	Hsh2d	8	1	72189638	72201527	non-DE
ENSMUSG00000034773	0.828553	0.396214	16.3324	5.31472e-05	0.00143986	BC030867	11	1	102248882	102265187	non-DE
ENSMUSG00000029999	0.823469	5.38766	52.5111	4.27832e-13	1.21008e-09	Tgfa	6	1	86195223	86275719	non-DE
ENSMUSG00000041859	0.813054	4.11584	36.586	1.46074e-09	7.12335e-07	Mcm3	1	-1	20802968	20820312	non-DE
ENSMUSG00000029813	0.80983	3.98284	7.82785	0.00514474	0.0294	1600015I10Rik	6	1	48929895	48933687	non-DE
ENSMUSG00000068373	0.809248	1.07791	15.7646	7.17319e-05	0.00174902	D430041D05Rik	2	-1	104143073	104411013	non-DE
ENSMUSG00000048142	0.798522	1.19664	20.3899	6.31628e-06	0.000354463	Nat8l	5	1	33995984	34005916	non-DE
ENSMUSG00000087086	0.794324	0.995072	17.9123	2.31315e-05	0.000871326	Gm13269	2	-1	14740372	14767024	non-DE
ENSMUSG00000069793	0.790951	1.47485	21.9459	2.80448e-06	0.000202352	Slfn9	11	-1	82978390	82991830	non-DE
ENSMUSG00000020914	0.790244	4.64058	67.3441	2.28027e-16	1.64855e-12	Top2a	11	-1	98992943	99024189	non-DE
ENSMUSG00000057606	0.789598	-0.0332577	11.2076	0.000814635	0.00881072	Colq	14	-1	31523082	31591343	non-DE
ENSMUSG00000055409	0.784872	-0.319988	14.5264	0.000138207	0.00261651	Nell1	7	1	49974864	50866608	non-DE
ENSMUSG00000102748	0.775996	0.0887139	20.0822	7.41835e-06	0.000397387	Pcdhgb2	18	1	37689828	37841873	non-DE
ENSMUSG00000028678	0.774	2.44178	37.3637	9.80318e-10	5.54546e-07	Kif2c	4	-1	117159639	117182639	non-DE
ENSMUSG00000041073	0.773184	3.34554	8.96352	0.00275424	0.019292	Nacad	11	-1	6597823	6606053	non-DE
ENSMUSG00000022385	0.772519	1.79837	22.3865	2.22938e-06	0.000164208	Gtse1	15	1	85859745	85876573	non-DE
ENSMUSG00000036718	0.765143	0.0944272	16.6044	4.60443e-05	0.00132225	Micall2	5	-1	139706696	139736336	non-DE
ENSMUSG00000030484	0.764221	0.86241	16.533	4.78105e-05	0.0013484	Lypd5	7	1	24349196	24355109	non-DE
ENSMUSG00000048538	0.762092	-0.076419	3.58942	0.0581485	0.143727	Gm9826	1	1	7177739	7179037	non-DE
ENSMUSG00000060044	0.761964	0.0872963	14.5047	0.000139814	0.00262932	Tmem26	10	1	68723646	68782650	non-DE
ENSMUSG00000005410	0.761002	4.53793	46.1454	1.09795e-11	2.21817e-08	Mcm5	8	1	75109569	75128439	non-DE
ENSMUSG00000045328	0.760556	2.89278	26.4181	2.74951e-07	3.50302e-05	Cenpe	3	1	135212537	135273611	non-DE
ENSMUSG00000032783	0.755264	0.717339	14.4811	0.000141571	0.00264957	Troap	15	1	99074575	99083409	non-DE
ENSMUSG00000023087	0.753144	5.06781	2.23917	0.134553	0.250178	Noct	3	1	51224447	51251644	non-DE
ENSMUSG00000002057	0.743823	0.193318	11.4459	0.000716537	0.0081392	Foxn1	11	-1	78357577	78386558	non-DE
ENSMUSG00000111942	0.743798	1.3137	12.5015	0.000406634	0.00551354	Gm5182	12	1	10152142	10158233	non-DE
ENSMUSG00000082674	0.739952	1.85854	11.2469	0.000797557	0.00869626	Gm11914	4	-1	27867149	27867655	non-DE
ENSMUSG00000037649	0.736092	2.40498	25.1579	5.28227e-07	5.65923e-05	H2-DMa	17	1	34119541	34139101	non-DE
ENSMUSG00000021175	0.733045	2.72894	29.3105	6.16606e-08	1.13218e-05	Cdca7l	12	1	117804289	117878706	non-DE
ENSMUSG00000024590	0.732778	5.77963	38.3714	5.84827e-10	3.7255e-07	Lmnb1	18	1	56707813	56753424	non-DE
ENSMUSG00000027547	0.73121	1.93293	12.6279	0.000380025	0.00525348	Sall4	2	-1	168748332	168767943	non-DE
ENSMUSG00000015599	0.729227	2.66891	15.9815	6.39651e-05	0.00162405	Ttbk1	17	-1	46442448	46487675	non-DE
ENSMUSG00000040084	0.728442	3.11334	31.8415	1.67282e-08	4.82797e-06	Bub1b	2	1	118598211	118641591	non-DE
ENSMUSG00000071192	0.728395	1.71893	12.386	0.000432576	0.00577122	Wfikkn1	17	-1	25877628	25880858	non-DE
ENSMUSG00000055368	0.720505	7.89315	27.1216	1.91049e-07	2.83091e-05	Slc6a2	8	1	92960079	93001667	non-DE
ENSMUSG00000017861	0.719006	2.91609	43.9034	3.44993e-11	4.87889e-08	Mybl2	2	1	163054687	163084688	non-DE
ENSMUSG00000079445	0.718113	6.90904	35.2416	2.91233e-09	1.17675e-06	B3gnt7	1	1	86302832	86307305	non-DE
ENSMUSG00000021464	0.717596	0.198746	14.951	0.000110342	0.00227781	Ror2	13	-1	53109312	53286124	non-DE
ENSMUSG00000029188	0.714908	5.44152	30.3532	3.60114e-08	7.62259e-06	Slc34a2	5	1	53038081	53071664	non-DE
ENSMUSG00000113581	0.714082	1.58092	12.7014	0.000365381	0.0051313	Dio3os	12	-1	110275385	110278172	non-DE
ENSMUSG00000007097	0.711159	2.05544	5.10184	0.0239004	0.0802438	Atp1a2	1	-1	172271709	172298064	non-DE
ENSMUSG00000000555	0.706517	8.06053	13.3325	0.000260839	0.00410208	Itga5	15	-1	103344286	103366763	non-DE
ENSMUSG00000029414	0.705793	1.91838	19.8305	8.46229e-06	0.000430029	Kntc1	5	1	123749716	123821593	non-DE
ENSMUSG00000057615	0.705764	5.7658	23.5618	1.20966e-06	0.000101827	Ldoc1	X	1	61709497	61710955	non-DE
ENSMUSG00000096225	0.704616	0.00485201	9.46181	0.00209794	0.016263	Lhx8	3	-1	154306294	154330659	non-DE
ENSMUSG00000062591	0.704114	6.33103	19.4482	1.03365e-05	0.000485642	Tubb4a	17	-1	57080066	57087782	non-DE
ENSMUSG00000048922	0.702959	2.195	29.7383	4.94492e-08	9.25611e-06	Cdca2	14	-1	67676331	67715841	non-DE
ENSMUSG00000020532	0.702354	3.19617	12.9248	0.000324252	0.00471766	Acaca	11	1	84129672	84401651	non-DE
ENSMUSG00000028873	0.700302	3.13712	30.1332	4.03357e-08	8.14897e-06	Cdca8	4	-1	124918465	124939311	non-DE
ENSMUSG00000032254	0.691878	2.69801	27.0299	2.00337e-07	2.83091e-05	Kif23	9	-1	61915905	61946774	non-DE
ENSMUSG00000026669	0.689414	2.40481	24.9536	5.87254e-07	6.01807e-05	Mcm10	2	-1	4989714	5012791	non-DE
ENSMUSG00000004552	0.687191	0.176413	7.77853	0.00528708	0.0299473	Ctse	1	1	131638306	131675505	non-DE
ENSMUSG00000020788	0.687047	4.26785	14.7011	0.000125976	0.00245393	Atp2a3	11	1	72961169	72993044	non-DE
ENSMUSG00000002835	0.686617	3.07212	21.2769	3.97503e-06	0.000256689	Chaf1a	17	1	56040439	56072289	non-DE
ENSMUSG00000032796	0.68625	6.08307	6.94751	0.0083936	0.0410136	Lama1	17	1	67697259	67822647	non-DE
ENSMUSG00000041923	0.685892	-0.352519	2.77633	0.0956671	0.198804	Nol4	18	-1	22693181	23041653	non-DE
ENSMUSG00000059022	0.683801	1.42327	10.5909	0.00113645	0.0109308	Kcp	6	-1	29473162	29507952	non-DE
ENSMUSG00000048126	0.67629	3.21204	5.08518	0.0241312	0.0807533	Col6a3	1	-1	90765923	90843971	non-DE
ENSMUSG00000038600	0.675391	4.72221	41.102	1.44489e-10	1.36224e-07	Atp6v0a4	6	-1	38048483	38124586	non-DE
ENSMUSG00000033227	0.675308	0.592088	7.71791	0.00546755	0.0305742	Wnt6	1	1	74771892	74785322	non-DE
ENSMUSG00000075592	0.672976	2.60325	8.29913	0.0039664	0.0246887	Nynrin	14	1	55854010	55874736	non-DE
ENSMUSG00000027878	0.670469	5.96311	10.7179	0.00106105	0.010508	Notch2	3	1	98013527	98150361	non-DE
ENSMUSG00000041372	0.669794	1.00985	6.73603	0.00944848	0.0442013	B4galnt3	6	-1	120203073	120294559	non-DE
ENSMUSG00000027469	0.669719	3.87614	26.2746	2.96157e-07	3.61056e-05	Tpx2	2	1	152847964	152895321	non-DE
ENSMUSG00000001517	0.668194	2.39258	19.7393	8.87577e-06	0.00044511	Foxm1	6	1	128362967	128376146	non-DE
ENSMUSG00000026185	0.666286	2.25275	6.20987	0.012704	0.0535659	Igfbp5	1	-1	72857932	72874884	non-DE
ENSMUSG00000058099	0.661174	2.22249	27.0285	2.00474e-07	2.83091e-05	Nfam1	15	-1	82992973	83033306	non-DE
ENSMUSG00000060470	0.661044	5.46184	18.1203	2.07376e-05	0.000808087	Adgrg3	8	1	95017692	95045250	non-DE
ENSMUSG00000051378	0.660871	1.39503	14.9627	0.000109656	0.00227781	Kif18b	11	-1	102905529	102925124	non-DE
ENSMUSG00000032744	0.660183	1.79209	12.1785	0.000483422	0.00623773	Heyl	4	1	123233556	123249875	non-DE
ENSMUSG00000027435	0.65941	5.91423	15.3917	8.73696e-05	0.00199287	Cd93	2	-1	148436640	148443563	non-DE
ENSMUSG00000031871	0.655625	8.90644	9.97119	0.00159009	0.0136444	Cdh5	8	1	104101625	104144511	non-DE
ENSMUSG00000020475	0.654687	3.95985	14.1706	0.000166957	0.0029841	Pgam2	11	-1	5801640	5803733	non-DE
ENSMUSG00000041245	0.654675	5.82216	21.1324	4.28617e-06	0.000272302	Wnk3	X	1	151198078	151320152	non-DE
ENSMUSG00000047534	0.653257	1.90968	20.105	7.33031e-06	0.000394164	Mis18bp1	12	-1	65132734	65172604	non-DE
ENSMUSG00000096403	0.65281	2.42344	2.10801	0.14653	0.265568	Gm9825	6	-1	7982541	7983383	non-DE
ENSMUSG00000049488	0.651284	2.81503	16.4929	4.88316e-05	0.00136635	Tmem67	4	-1	12039355	12090020	non-DE
ENSMUSG00000041481	0.650739	0.279584	11.5687	0.000670707	0.00780028	Serpina3g	12	1	104236245	104241939	non-DE
ENSMUSG00000031245	0.649588	6.00082	13.9399	0.000188748	0.00326566	Hmgn5	X	-1	109004534	109013404	non-DE
ENSMUSG00000103050	0.648708	2.73142	23.657	1.15126e-06	9.81785e-05	Gm38273	2	-1	14735546	14737927	non-DE
ENSMUSG00000064325	0.646695	-0.124748	7.26322	0.0070381	0.0360808	Hhip	8	-1	79965851	80058006	non-DE
ENSMUSG00000021087	0.646416	4.36115	15.2361	9.48717e-05	0.00210429	Rtn1	12	-1	72211752	72409054	non-DE
ENSMUSG00000045983	0.646193	9.18936	10.9422	0.000939977	0.00966775	Eif4g1	16	1	20668313	20692884	non-DE
ENSMUSG00000002870	0.644714	4.19043	26.6687	2.41496e-07	3.22193e-05	Mcm2	6	-1	88883474	88898780	non-DE
ENSMUSG00000033965	0.64413	0.440856	11.1252	0.000851641	0.00902916	Slc16a2	X	-1	103697414	103821983	non-DE
ENSMUSG00000085957	0.639928	6.85405	10.8168	0.00100585	0.010145	Syna	5	-1	134558146	134560171	non-DE
ENSMUSG00000041734	0.639198	5.80601	9.22577	0.00238633	0.0176596	Kirrel	3	-1	87078593	87174747	non-DE
ENSMUSG00000040728	0.637461	5.97175	24.7983	6.36536e-07	6.42993e-05	Esrp1	4	-1	11331933	11386783	non-DE
ENSMUSG00000001228	0.637037	4.57556	24.3406	8.07212e-07	7.66147e-05	Uhrf1	17	1	56303321	56323486	non-DE
ENSMUSG00000031004	0.636913	3.88286	15.3176	9.08677e-05	0.00205938	Mki67	7	-1	135689784	135716361	non-DE
ENSMUSG00000021823	0.635694	7.00127	5.69371	0.0170258	0.0645695	Vcl	14	1	20929398	21033676	non-DE
ENSMUSG00000027715	0.635632	4.11802	31.3316	2.17506e-08	5.49281e-06	Ccna2	3	-1	36564865	36572150	non-DE
ENSMUSG00000032327	0.634052	7.8416	13.291	0.000266677	0.00415804	Stra6	9	1	58063788	58153996	non-DE
ENSMUSG00000022346	0.633639	3.39215	15.4413	8.51061e-05	0.00197307	Myc	15	1	61985391	61990374	non-DE
ENSMUSG00000025608	0.632693	8.34246	20.8596	4.94197e-06	0.000302324	Podxl	6	-1	31519488	31563981	non-DE
ENSMUSG00000061833	0.632286	0.650318	1.61019	0.204465	0.335718	Gm6311	13	1	75954136	75955013	non-DE
ENSMUSG00000032221	0.632109	0.159383	14.5656	0.00013536	0.00258947	Mns1	9	1	72438011	72462025	non-DE
ENSMUSG00000026837	0.631645	4.65647	5.36401	0.0205564	0.0725683	Col5a1	2	1	27886425	28039514	non-DE
ENSMUSG00000038463	0.631399	1.92294	10.5985	0.00113177	0.0109029	Olfml2b	1	1	170644532	170682789	non-DE
ENSMUSG00000005397	0.630279	9.48997	7.04469	0.00795004	0.0394213	Nid1	13	1	13437551	13512269	non-DE
ENSMUSG00000028718	0.630136	1.97114	23.9702	9.78391e-07	8.81299e-05	Stil	4	1	115000159	115043196	non-DE
ENSMUSG00000028337	0.628715	3.68383	3.34247	0.067513	0.158389	Coro2a	4	-1	46536937	46602202	non-DE
ENSMUSG00000006403	0.628641	4.58307	11.451	0.000714571	0.0081299	Adamts4	1	1	171250421	171260637	non-DE
ENSMUSG00000051375	0.628173	4.48557	10.5367	0.00117029	0.01116	Pcdh1	18	-1	38185914	38212053	non-DE
ENSMUSG00000035112	0.627991	3.94181	17.3923	3.04057e-05	0.00105392	Wnk4	11	1	101260567	101277409	non-DE
ENSMUSG00000020435	0.627772	3.7524	13.9343	0.00018931	0.00326803	Osbp2	11	-1	3703731	3863903	non-DE
ENSMUSG00000020241	0.627004	3.67122	10.1198	0.00146682	0.0129567	Col6a2	10	-1	76595762	76623630	non-DE
ENSMUSG00000041577	0.626709	3.0625	15.8928	6.70335e-05	0.00167785	Prelp	1	-1	133910304	133921414	non-DE
ENSMUSG00000054446	0.624981	0.819283	9.12237	0.00252502	0.0181909	Cpa1	6	1	30639218	30645363	non-DE
ENSMUSG00000038943	0.623426	3.30978	34.3883	4.51431e-09	1.68004e-06	Prc1	7	1	80294450	80316259	non-DE
ENSMUSG00000003779	0.621168	3.11319	32.1388	1.43542e-08	4.41297e-06	Kif20a	18	1	34624613	34633277	non-DE
ENSMUSG00000039994	0.621073	3.48259	25.2884	4.93672e-07	5.4543e-05	Timeless	10	1	128232065	128252941	non-DE
ENSMUSG00000027219	0.620617	3.60654	26.9039	2.13828e-07	2.96467e-05	Slc28a2	2	1	122426477	122461137	non-DE
ENSMUSG00000046312	0.62044	4.427	18.0599	2.14061e-05	0.000827119	AI464131	4	-1	41495604	41503076	non-DE
ENSMUSG00000038214	0.62036	4.29016	16.5846	4.65268e-05	0.00132391	Bend3	10	1	43478831	43515396	non-DE
ENSMUSG00000054640	0.620288	-0.148981	9.36113	0.00221635	0.0168605	Slc8a1	17	-1	81373105	81738377	non-DE
ENSMUSG00000032338	0.619112	-0.270873	8.15795	0.00428727	0.0260105	Hcn4	9	1	58823412	58863175	non-DE
ENSMUSG00000039262	0.617962	6.83039	6.28246	0.0121939	0.0521141	Prrc2b	2	1	32151082	32234537	non-DE
ENSMUSG00000038252	0.617833	3.94217	21.8524	2.94447e-06	0.000211374	Ncapd2	6	-1	125168007	125191701	non-DE
ENSMUSG00000034224	0.615619	-0.137878	5.22375	0.0222804	0.0765338	Slc38a8	8	-1	119479602	119501698	non-DE
ENSMUSG00000021614	0.615509	0.693851	6.11555	0.0133998	0.0555067	Vcan	13	-1	89655312	89742509	non-DE
ENSMUSG00000066440	0.615164	6.37805	10.7161	0.00106208	0.0105108	Zfyve26	12	-1	79232346	79296304	non-DE
ENSMUSG00000015880	0.615063	2.57064	21.2633	4.00333e-06	0.000257341	Ncapg	5	1	45669919	45700546	non-DE
ENSMUSG00000052302	0.61452	3.27969	15.0376	0.00010539	0.00224063	Tbc1d30	10	-1	121263820	121351278	non-DE
ENSMUSG00000056394	0.611419	4.11614	40.672	1.80046e-10	1.42664e-07	Lig1	7	1	13277283	13311433	non-DE
ENSMUSG00000020897	0.611397	2.68432	26.1727	3.12198e-07	3.71017e-05	Aurkb	11	1	69045647	69051664	non-DE
ENSMUSG00000020105	0.611201	1.61003	13.1421	0.000288728	0.00438943	Lrig3	10	1	125966168	126015359	non-DE
ENSMUSG00000026407	0.60921	0.200013	8.031	0.00459834	0.0272776	Cacna1s	1	1	136052750	136119822	non-DE
ENSMUSG00000061048	0.608933	8.03263	12.5929	0.00038722	0.00532259	Cdh3	8	1	106510891	106557297	non-DE
ENSMUSG00000001119	0.606707	3.12937	5.97769	0.014488	0.0582898	Col6a1	10	-1	76708792	76726168	non-DE
ENSMUSG00000029673	0.606514	3.50727	13.4215	0.000248754	0.0039795	Auts2	5	-1	131437333	132543344	non-DE
ENSMUSG00000024873	0.604471	0.744555	11.3038	0.000773477	0.00853012	Cnih2	19	-1	5092868	5098521	non-DE
ENSMUSG00000044338	0.602856	5.00753	35.0273	3.25121e-09	1.27718e-06	Aplnr	2	1	85136225	85139923	non-DE
ENSMUSG00000024042	0.597316	4.533	9.80524	0.00174015	0.0145187	Sik1	17	-1	31844250	31855804	non-DE
ENSMUSG00000087036	0.596366	1.29071	11.9576	0.000544241	0.00678717	Gm11748	11	-1	118476470	118479458	non-DE
ENSMUSG00000031375	0.5962	5.21113	12.9403	0.00032158	0.00469826	Bgn	X	1	73483602	73495933	non-DE
ENSMUSG00000041498	0.594899	0.877082	20.4812	6.02203e-06	0.000342315	Kif14	1	1	136466343	136531511	non-DE
ENSMUSG00000030091	0.594735	4.13816	7.27283	0.00700055	0.0359223	Nup210	6	-1	91013068	91116829	non-DE
ENSMUSG00000033871	0.592327	2.76226	10.3248	0.00131253	0.0120532	Ppargc1b	18	-1	61298136	61400431	non-DE
ENSMUSG00000032193	0.591889	6.81557	7.35321	0.00669432	0.0348568	Ldlr	9	1	21723483	21749919	non-DE
ENSMUSG00000020122	0.591209	4.6605	10.4503	0.00122629	0.0115161	Egfr	11	1	16752203	16918158	non-DE
ENSMUSG00000012443	0.590794	3.12474	25.029	5.64754e-07	5.97749e-05	Kif11	19	1	37376403	37421859	non-DE
ENSMUSG00000024660	0.590771	3.59479	24.412	7.77832e-07	7.48306e-05	Incenp	19	-1	9872296	9899551	non-DE
ENSMUSG00000040896	0.585874	1.92648	9.33412	0.00224926	0.0169716	Kcnd3	3	1	105452330	105674002	non-DE
ENSMUSG00000020080	0.583138	2.45061	9.91702	0.00163757	0.0139258	Hkdc1	10	-1	62383137	62422491	non-DE
ENSMUSG00000005198	0.582383	6.13439	6.40385	0.0113873	0.0498265	Polr2a	11	-1	69733997	69758637	non-DE
ENSMUSG00000039055	0.581578	1.40412	14.1399	0.000169705	0.00301882	Eme1	11	-1	94644996	94653964	non-DE
ENSMUSG00000022443	0.580936	8.84339	5.3766	0.0204086	0.0722777	Myh9	15	-1	77760587	77842175	non-DE
ENSMUSG00000063531	0.579253	5.07466	13.1419	0.000288758	0.00438943	Sema3e	5	1	14025276	14256689	non-DE
ENSMUSG00000030513	0.578249	4.27714	2.48757	0.114749	0.224544	Pcsk6	7	1	65861734	66050386	non-DE
ENSMUSG00000026196	0.577029	0.472518	13.4088	0.00025045	0.00399308	Bard1	1	-1	71027498	71103146	non-DE
ENSMUSG00000023015	0.576786	3.70612	29.2449	6.37834e-08	1.1418e-05	Racgap1	15	-1	99620496	99651656	non-DE
ENSMUSG00000001870	0.576746	3.00614	7.48899	0.00620773	0.0330907	Ltbp1	17	1	75005568	75392512	non-DE
ENSMUSG00000014361	0.576372	5.69361	17.1844	3.39215e-05	0.00112847	Mertk	2	1	128698956	128802894	non-DE
ENSMUSG00000005237	0.576185	0.807234	2.72044	0.0990708	0.203601	Dnah2	11	-1	69420809	69549110	non-DE
ENSMUSG00000021779	0.575999	3.29749	15.8418	6.88648e-05	0.00171158	Thrb	14	1	17660261	18038090	non-DE
ENSMUSG00000047751	0.575881	1.55979	11.5648	0.000672137	0.00781049	Utf1	7	1	139943789	139945112	non-DE
ENSMUSG00000006464	0.575719	1.24076	14.9505	0.000110368	0.00227781	Bbs1	19	-1	4886878	4906628	non-DE
ENSMUSG00000021223	0.575255	2.64458	8.53651	0.00348092	0.0225139	Papln	12	1	83763634	83792382	non-DE
ENSMUSG00000048327	0.575054	2.62823	21.7167	3.16024e-06	0.000221248	Ckap2l	2	-1	129268210	129297212	non-DE
ENSMUSG00000037544	0.573964	2.92927	23.1365	1.50901e-06	0.000121252	Dlgap5	14	-1	47387779	47418407	non-DE
ENSMUSG00000085666	0.573004	2.06439	1.32497	0.249701	0.386777	Gm9855	10	-1	42054113	42055306	non-DE
ENSMUSG00000050069	0.572467	4.00509	9.12918	0.00251564	0.0181779	Grem2	1	-1	174833785	174921819	non-DE
ENSMUSG00000030319	0.570158	5.11208	11.0195	0.000901589	0.00939335	Cand2	6	1	115774538	115805557	non-DE
ENSMUSG00000002489	0.569555	4.06443	4.21727	0.0400145	0.11196	Tiam1	16	-1	89787111	90143769	non-DE
ENSMUSG00000028184	0.569292	6.35784	11.0686	0.000878039	0.00921843	Adgrl2	3	-1	148815583	148990555	non-DE
ENSMUSG00000009654	0.568197	2.47001	13.929	0.000189843	0.00327011	Oit3	10	-1	59422958	59441778	non-DE
ENSMUSG00000005089	0.56772	1.88774	12.5879	0.000388248	0.00533069	Slc1a2	2	1	102658659	102790784	non-DE
ENSMUSG00000030677	0.567423	2.8939	18.6452	1.5744e-05	0.000656788	Kif22	7	-1	127027729	127042471	non-DE
ENSMUSG00000020185	0.567304	3.89732	14.252	0.00015989	0.00289151	E2f7	10	1	110745439	110787384	non-DE
ENSMUSG00000027848	0.567233	2.44829	16.1417	5.87745e-05	0.00152584	Olfml3	3	-1	103722222	103738001	non-DE
ENSMUSG00000049550	0.566939	6.69163	21.0071	4.57587e-06	0.000287037	Clip1	5	-1	123577795	123684618	non-DE
ENSMUSG00000075254	0.566143	5.5422	11.6317	0.000648374	0.00762837	Heg1	16	1	33684370	33771576	non-DE
ENSMUSG00000054256	0.566045	-0.135002	5.84764	0.015598	0.0610368	Msi1	5	1	115429599	115455698	non-DE
ENSMUSG00000009248	0.565888	3.65192	4.74594	0.0293675	0.0920165	Ascl2	7	-1	142966829	142969264	non-DE
ENSMUSG00000001095	0.562647	0.0701705	6.3244	0.0119088	0.051377	Slc13a2	11	-1	78397087	78422217	non-DE
ENSMUSG00000057193	0.562559	6.46353	9.10163	0.00255382	0.0182959	Slc44a2	9	1	21320698	21355028	non-DE
ENSMUSG00000037032	0.562049	4.92108	32.8711	9.84778e-09	3.23877e-06	Apbb1	7	-1	105558483	105581653	non-DE
ENSMUSG00000020826	0.562026	6.61304	17.912	2.31356e-05	0.000871326	Nos2	11	1	78920787	78960254	non-DE
ENSMUSG00000004231	0.561583	3.56824	7.91924	0.00489119	0.0284538	Pax2	19	1	44756045	44837871	non-DE
ENSMUSG00000001506	0.560909	6.17384	2.5867	0.107765	0.215104	Col1a1	11	1	94936224	94953042	non-DE
ENSMUSG00000019899	0.560423	1.64857	9.59474	0.00195136	0.0155998	Lama2	10	-1	26980036	27619758	non-DE
ENSMUSG00000052632	0.559782	3.95574	10.5655	0.00115215	0.0110391	Asap2	12	1	20990459	21270171	non-DE
ENSMUSG00000020654	0.559184	1.73471	6.5482	0.010499	0.0473478	Adcy3	12	1	4133103	4213525	non-DE
ENSMUSG00000041133	0.558223	4.82124	8.68578	0.00320703	0.021233	Smc1a	X	1	152016428	152062694	non-DE
ENSMUSG00000031785	0.558165	8.29849	10.7037	0.00106919	0.0105577	Adgrg1	8	1	94974751	95014217	non-DE
ENSMUSG00000031506	0.557526	0.831397	10.1722	0.00142577	0.0127294	Ptpn7	1	1	135132700	135145317	non-DE
ENSMUSG00000002227	0.556247	5.92562	8.59325	0.00337411	0.0219893	Mov10	3	-1	104794836	104818563	non-DE
ENSMUSG00000049414	0.555649	1.69178	3.83427	0.0502147	0.130157	Gm5417	15	-1	83405626	83406063	non-DE
ENSMUSG00000087166	0.555638	5.10855	10.6729	0.00108718	0.0106475	L1td1	4	1	98726734	98738480	non-DE
ENSMUSG00000069910	0.555161	1.54558	13.9487	0.000187865	0.0032627	Spdl1	11	-1	34809190	34833641	non-DE
ENSMUSG00000015766	0.553685	5.30459	22.1885	2.47145e-06	0.000181094	Eps8	6	-1	137477245	137654876	non-DE
ENSMUSG00000051243	0.553622	4.34622	11.5126	0.000691272	0.0079869	Islr2	9	-1	58196297	58204319	non-DE
ENSMUSG00000036030	0.552333	1.17426	9.56946	0.00197841	0.0157007	Prtg	9	1	72806874	72917291	non-DE
ENSMUSG00000026827	0.551569	6.36212	15.3031	9.15666e-05	0.00206529	Gpd2	2	1	57237635	57370719	non-DE
ENSMUSG00000022883	0.551469	1.92908	6.25619	0.012376	0.0526851	Robo1	16	1	72308306	73046095	non-DE
ENSMUSG00000026605	0.551008	2.46898	15.726	7.32121e-05	0.00177932	Cenpf	1	-1	189640606	189688086	non-DE
ENSMUSG00000022221	0.550729	1.92044	16.6888	4.40407e-05	0.00129935	Ripk3	14	-1	55784995	55788865	non-DE
ENSMUSG00000030123	0.55049	6.03949	4.96075	0.0259289	0.0844512	Plxnd1	6	-1	115954811	115995005	non-DE
ENSMUSG00000024421	0.549898	0.953486	4.79231	0.0285871	0.0901602	Lama3	18	1	12333819	12583013	non-DE
ENSMUSG00000105987	0.549883	2.1705	2.33609	0.126406	0.23963	AI506816	5	-1	23698296	23712667	non-DE
ENSMUSG00000025810	0.54913	3.72873	7.27589	0.00698863	0.0359002	Nrp1	8	1	128358604	128503363	non-DE
ENSMUSG00000034206	0.547775	1.35468	11.4683	0.000707921	0.00811256	Polq	16	1	37011786	37095417	non-DE
ENSMUSG00000090958	0.547623	3.55024	6.19664	0.0127993	0.0537912	Lrrc32	7	1	98489283	98502181	non-DE
ENSMUSG00000051043	0.547326	7.57881	16.167	5.79961e-05	0.00152111	Gprc5c	11	1	114851152	114872617	non-DE
ENSMUSG00000032243	0.54672	0.572312	1.74713	0.186238	0.314101	Itga11	9	1	62677826	62783982	non-DE
ENSMUSG00000041757	0.546048	7.11078	14.8656	0.000115451	0.00233577	Plekha6	1	1	133164210	133303435	non-DE
ENSMUSG00000025969	0.545864	3.83824	10.3157	0.001319	0.0120968	Nrp2	1	1	62703285	62818695	non-DE
ENSMUSG00000048012	0.54523	1.15322	14.1452	0.00016923	0.00301417	Zfp473	7	-1	44731480	44751050	non-DE
ENSMUSG00000022892	0.544816	8.50305	12.8353	0.00034014	0.00487447	App	16	-1	84949685	85173766	non-DE
ENSMUSG00000027323	0.543764	3.2468	10.6367	0.00110865	0.0107904	Rad51	2	1	119112793	119147445	non-DE
ENSMUSG00000020900	0.543552	5.95275	7.70518	0.00550626	0.0306854	Myh10	11	1	68691559	68816632	non-DE
ENSMUSG00000021708	0.543287	0.85587	8.06885	0.00450327	0.0269525	Rasgrf2	13	-1	91880400	92131656	non-DE
ENSMUSG00000064043	0.542717	3.22854	10.5265	0.00117678	0.0111947	Trerf1	17	1	47140875	47361958	non-DE
ENSMUSG00000055799	0.542423	3.78243	9.41371	0.00215369	0.01658	Tcf7l1	6	-1	72626378	72789254	non-DE
ENSMUSG00000040225	0.542014	6.20624	6.94705	0.00839574	0.0410136	Prrc2c	1	-1	162670725	162740556	non-DE
ENSMUSG00000006678	0.54163	2.34114	19.1876	1.18481e-05	0.000540502	Pola1	X	-1	93304767	93632155	non-DE
ENSMUSG00000033585	0.541515	5.74007	19.7178	8.97624e-06	0.000448558	Ndn	7	1	62346569	62350262	non-DE
ENSMUSG00000021136	0.540298	5.8574	9.08279	0.00258026	0.0183922	Smoc1	12	1	81026808	81186414	non-DE
ENSMUSG00000004098	0.538577	1.82435	2.79848	0.0943539	0.196978	Col5a3	9	-1	20770050	20815067	non-DE
ENSMUSG00000062760	0.538385	1.02284	8.89175	0.00286462	0.0197328	Shisal1	15	-1	84379203	84447097	non-DE
ENSMUSG00000020758	0.537866	4.29524	8.60336	0.00335543	0.0219355	Itgb4	11	1	115974709	116008412	non-DE
ENSMUSG00000090399	0.537523	0.206795	3.04335	0.0810686	0.178291	Gm38399	1	-1	135606447	135688105	non-DE
ENSMUSG00000027186	0.537068	0.652462	7.19455	0.00731252	0.0371858	Elf5	2	1	103411688	103450989	non-DE
ENSMUSG00000053414	0.536135	4.35707	7.72647	0.00544172	0.0304779	Hunk	16	1	90386013	90499553	non-DE
ENSMUSG00000058729	0.535979	3.36592	22.7345	1.85998e-06	0.000142955	Lin9	1	1	180641150	180690694	non-DE
ENSMUSG00000085272	0.535878	0.075244	8.22943	0.00412164	0.0253461	Sbk3	7	-1	4965260	4971168	non-DE
ENSMUSG00000029309	0.535784	5.47176	13.0057	0.000310541	0.00461506	Sparcl1	5	-1	104079111	104113733	non-DE
ENSMUSG00000024795	0.534794	2.88786	18.8358	1.42471e-05	0.00060871	Kif20b	19	1	34922361	34975745	non-DE
ENSMUSG00000042638	0.533594	0.0735237	4.42237	0.0354708	0.103599	Gucy2c	6	-1	136697284	136781765	non-DE
ENSMUSG00000030411	0.532956	0.812507	4.90585	0.0267659	0.0861454	Nova2	7	1	18925888	18965319	non-DE
ENSMUSG00000039748	0.532879	2.27856	15.3426	8.96735e-05	0.00203885	Exo1	1	1	175880581	175913489	non-DE
ENSMUSG00000032187	0.532116	6.4471	7.74831	0.00537628	0.0302489	Smarca4	9	1	21616169	21704230	non-DE
ENSMUSG00000062157	0.532065	4.32151	23.7728	1.08402e-06	9.46306e-05	Ifnlr1	4	1	135686287	135708181	non-DE
ENSMUSG00000002799	0.531932	5.27393	9.06469	0.00260593	0.0185127	Jag2	12	-1	112907819	112929776	non-DE
ENSMUSG00000042699	0.531583	6.52234	7.5909	0.00586636	0.0319454	Dhx9	1	-1	153455758	153487660	non-DE
ENSMUSG00000054753	0.531567	6.98942	10.2699	0.0013522	0.0123293	AU018091	7	-1	3154658	3169203	non-DE
ENSMUSG00000070780	0.531337	5.32465	12.0018	0.000531503	0.00665179	Rbm47	5	-1	66016549	66173118	non-DE
ENSMUSG00000024526	0.531174	0.977233	7.05334	0.00791178	0.0393143	Cidea	18	1	67343604	67367785	non-DE
ENSMUSG00000047730	0.530271	-0.172924	3.06443	0.080023	0.176866	Fcgbp	7	1	28071236	28120862	non-DE
ENSMUSG00000028766	0.530174	7.59969	11.4665	0.000708615	0.00811256	Alpl	4	-1	137741733	137796384	non-DE
ENSMUSG00000030811	0.52965	7.54402	15.3983	8.70675e-05	0.00199287	Fbxl19	7	1	127744543	127769483	non-DE
ENSMUSG00000020850	0.529576	6.752	5.81496	0.0158904	0.0617199	Prpf8	11	1	75486816	75509449	non-DE
ENSMUSG00000001802	0.529297	0.404128	7.67264	0.00560643	0.0310804	Lrp3	7	-1	35200027	35215498	non-DE
ENSMUSG00000038013	0.529231	4.23044	9.27998	0.00231672	0.0172736	Wipf2	11	1	98863638	98905040	non-DE
ENSMUSG00000029875	0.527721	1.04031	11.6296	0.000649103	0.00762888	Ccdc184	15	1	98167158	98170134	non-DE
ENSMUSG00000052533	0.527298	4.92664	6.31809	0.0119512	0.0514817	Nup188	2	1	30286397	30344266	non-DE
ENSMUSG00000052949	0.527254	5.34297	10.243	0.00137208	0.0124305	Rnf157	11	-1	116336353	116413032	non-DE
ENSMUSG00000108367	0.527174	1.44704	12.4319	0.000422062	0.00567917	Gm4881	7	-1	24927445	24944494	non-DE
ENSMUSG00000007080	0.527147	1.94974	10.953	0.00093451	0.00963254	Pole	5	1	110286306	110337474	non-DE
ENSMUSG00000037474	0.527023	2.77111	15.0353	0.00010552	0.00224063	Dtl	1	-1	191537356	191575544	non-DE
ENSMUSG00000031486	0.526611	4.09615	7.45616	0.00632198	0.0334977	Adgra2	8	1	27085583	27123436	non-DE
ENSMUSG00000003660	0.526137	5.97703	6.89317	0.00865256	0.0418054	Snrnp200	2	1	127208386	127240451	non-DE
ENSMUSG00000013236	0.525902	3.20605	11.556	0.00067531	0.00782985	Ptprs	17	-1	56412426	56476483	non-DE
ENSMUSG00000043987	0.524878	5.6985	10.4028	0.00125823	0.0117339	Cep164	9	-1	45766946	45828691	non-DE
ENSMUSG00000034311	0.524068	2.32204	15.7715	7.14716e-05	0.00174902	Kif4	X	1	100625737	100727214	non-DE
ENSMUSG00000049553	0.524018	4.68908	7.3853	0.00657591	0.0344559	Polr1a	6	1	71909053	71984935	non-DE
ENSMUSG00000035842	0.523395	1.25589	12.0197	0.000526417	0.00661154	Ddx11	17	1	66123520	66152174	non-DE
ENSMUSG00000024304	0.523016	0.838165	6.93004	0.00847597	0.0411915	Cdh2	18	-1	16588877	16809246	non-DE
ENSMUSG00000032280	0.522022	6.702	6.42107	0.0112774	0.0495605	Tle3	9	1	61372366	61418497	non-DE
ENSMUSG00000036862	0.521469	2.0525	4.65659	0.0309346	0.0950604	Dchs1	7	-1	105752990	105787654	non-DE
ENSMUSG00000035314	0.521409	5.59345	9.00467	0.00269291	0.0190289	Gdpd5	7	1	99381414	99461877	non-DE
ENSMUSG00000037016	0.520886	3.43859	6.91021	0.00857051	0.0415367	Frem2	3	-1	53513938	53657355	non-DE
ENSMUSG00000026478	0.520376	8.19855	3.52847	0.0603235	0.147147	Lamc1	1	-1	153218922	153332786	non-DE
ENSMUSG00000039477	0.52014	7.05512	4.16343	0.0413056	0.114493	Tnrc18	5	-1	142724661	142817662	non-DE
ENSMUSG00000034023	0.520133	1.70584	14.0234	0.000180548	0.00316004	Fancd2	6	1	113531682	113597017	non-DE
ENSMUSG00000032481	0.519579	5.7646	8.91862	0.00282277	0.0196097	Smarcc1	9	1	110117708	110240178	non-DE
ENSMUSG00000041794	0.519482	0.116102	1.96429	0.161056	0.28336	Myrip	9	1	120301513	120474841	non-DE
ENSMUSG00000022191	0.519455	5.54226	13.188	0.000281743	0.00431213	Drosha	15	1	12824815	12935291	non-DE
ENSMUSG00000036768	0.519062	1.51117	11.108	0.000859542	0.00907138	Kif15	9	1	122951046	123018733	non-DE
ENSMUSG00000028532	0.518612	2.63487	6.54792	0.0105007	0.0473478	Cachd1	4	1	100776675	101029220	non-DE
ENSMUSG00000037455	0.518373	1.31726	9.45513	0.00210559	0.0162984	Slc18b1	10	1	23796986	23827968	non-DE
ENSMUSG00000076435	0.518014	3.40663	16.1658	5.80333e-05	0.00152111	Acsf2	11	-1	94557102	94601871	non-DE
ENSMUSG00000024393	0.517806	7.33792	5.12566	0.0235745	0.0794545	Prrc2a	17	-1	35149076	35164897	non-DE
ENSMUSG00000030732	0.517558	3.74384	1.00019	0.317264	0.455507	Chrdl2	7	1	100006172	100034728	non-DE
ENSMUSG00000025153	0.5175	4.83492	4.33722	0.0372878	0.106844	Fasn	11	-1	120805846	120824547	non-DE
ENSMUSG00000034906	0.517438	3.20294	23.8741	1.02848e-06	9.14764e-05	Ncaph	2	-1	127103809	127133954	non-DE
ENSMUSG00000040296	0.517015	5.04287	10.9662	0.000927891	0.00958527	Ddx58	4	-1	40203773	40239828	non-DE
ENSMUSG00000042606	0.516623	2.22294	12.7289	0.000360057	0.00508176	Hirip3	7	1	126861972	126865377	non-DE
ENSMUSG00000035049	0.516192	3.94688	8.98124	0.00272766	0.0191661	Rrp12	19	-1	41862851	41896173	non-DE
ENSMUSG00000074802	0.514851	2.21012	11.2049	0.000815826	0.00881072	Gas2l3	10	-1	89408823	89443967	non-DE
ENSMUSG00000057706	0.514544	4.20782	12.9202	0.000325048	0.00472439	Mex3b	7	1	82867333	82871515	non-DE
ENSMUSG00000028519	0.514522	5.01759	20.1528	7.14954e-06	0.000388662	Dab1	4	1	103619359	104744844	non-DE
ENSMUSG00000029516	0.514345	1.14381	5.92099	0.0149616	0.0596187	Cit	5	1	115845278	116008947	non-DE
ENSMUSG00000028465	0.513817	7.95926	6.22864	0.01257	0.0531912	Tln1	4	-1	43531519	43562691	non-DE
ENSMUSG00000032898	0.512482	7.55156	15.0237	0.00010617	0.00224785	Fbxo21	5	1	117976730	118010201	non-DE
ENSMUSG00000028364	0.512244	1.19922	2.76751	0.0961955	0.199463	Tnc	4	-1	63959785	64047015	non-DE
ENSMUSG00000015243	0.512215	6.62965	5.78886	0.016128	0.0623687	Abca1	4	-1	53030787	53159895	non-DE
ENSMUSG00000051457	0.512105	4.31997	30.6734	3.05323e-08	7.19647e-06	Spn	7	-1	127132232	127137823	non-DE
ENSMUSG00000084616	0.512091	0.98104	4.4187	0.0355471	0.103735	Gm25047	X	1	36363899	36364002	non-DE
ENSMUSG00000021375	0.511947	5.91115	8.61985	0.00332519	0.0218011	Kif13a	13	-1	46749087	46929867	non-DE
ENSMUSG00000074283	0.51187	0.537779	10.7622	0.00103592	0.0103173	Zfp109	7	-1	24227572	24237560	non-DE
ENSMUSG00000042029	0.511774	3.1596	17.0806	3.58273e-05	0.00115027	Ncapg2	12	1	116405402	116463731	non-DE
ENSMUSG00000069729	0.511689	6.78503	7.56993	0.00593502	0.032177	Arid1b	17	1	4994332	5347656	non-DE
ENSMUSG00000001750	0.511042	5.21229	18.2462	1.94109e-05	0.000773265	Tcirg1	19	-1	3896050	3907133	non-DE
ENSMUSG00000039835	0.510655	4.58332	12.4463	0.000418827	0.00565176	Nhsl1	10	1	18318985	18533892	non-DE
ENSMUSG00000005148	0.51012	3.68479	8.86124	0.0029129	0.0199778	Klf5	14	1	99298691	99315036	non-DE
ENSMUSG00000038094	0.508724	0.0712324	6.09361	0.0135672	0.0559379	Atp13a4	16	-1	29395853	29544864	non-DE
ENSMUSG00000038379	0.508348	1.58971	12.934	0.000322675	0.00469955	Ttk	9	1	83834689	83872389	non-DE
ENSMUSG00000046179	0.508279	5.66323	11.4639	0.000709602	0.00811256	E2f8	7	-1	48866429	48881596	non-DE
ENSMUSG00000019189	0.507821	6.55712	11.4587	0.000711582	0.00811548	Rnf145	11	1	44518964	44565520	non-DE
ENSMUSG00000038729	0.507435	-0.0798778	5.1197	0.0236557	0.0796711	Akap2	4	1	57717657	57896984	non-DE
ENSMUSG00000036777	0.507327	3.50787	20.5119	5.92602e-06	0.000340882	Anln	9	-1	22332012	22389188	non-DE
ENSMUSG00000019326	0.506479	2.20488	5.58681	0.0180962	0.0670816	Aoc3	11	1	101330605	101341938	non-DE
ENSMUSG00000029189	0.506425	3.94259	10.9095	0.000956741	0.00977618	Sel1l3	5	-1	53107083	53213927	non-DE
ENSMUSG00000025780	0.506204	5.2331	11.1263	0.000851109	0.00902916	Itih5	2	1	10153571	10256529	non-DE
ENSMUSG00000071226	0.506043	4.56405	14.3896	0.000148624	0.00274033	Cecr2	6	1	120666369	120771190	non-DE
ENSMUSG00000022673	0.505902	4.27229	17.2475	3.28125e-05	0.00110437	Mcm4	16	-1	15623897	15637400	non-DE
ENSMUSG00000058392	0.505221	6.07104	11.3577	0.000751351	0.00838643	Rrp1b	17	1	32036100	32062865	non-DE
ENSMUSG00000039782	0.505154	5.27716	7.5685	0.00593973	0.032177	Cpeb2	5	1	43233170	43289724	non-DE
ENSMUSG00000014444	0.504578	5.78478	4.44668	0.0349692	0.102878	Piezo1	8	-1	122481698	122551329	non-DE
ENSMUSG00000026923	0.504356	2.63118	3.66987	0.0554045	0.138973	Notch1	2	-1	26457903	26516663	non-DE
ENSMUSG00000044646	0.504082	3.49515	9.77809	0.00176603	0.0146654	Zbtb7c	18	1	75820178	76148564	non-DE
ENSMUSG00000031558	0.504011	1.5531	5.16248	0.0230799	0.0781404	Slit2	5	1	47983138	48307733	non-DE
ENSMUSG00000053128	0.50279	-0.274704	1.0751	0.299795	0.437941	Rnf26	9	-1	44095631	44113517	non-DE
ENSMUSG00000007279	0.502203	1.17966	6.02964	0.0140676	0.0572008	Scube2	7	-1	109798676	109865679	non-DE
ENSMUSG00000031665	0.501868	4.71188	11.5556	0.000675465	0.00782985	Sall1	8	-1	89027235	89044162	non-DE
ENSMUSG00000040007	0.500525	7.31428	8.13136	0.00435061	0.0263045	Bahd1	2	1	118900377	118924528	non-DE
ENSMUSG00000066554	0.500362	1.02769	6.33136	0.0118621	0.0512555	Gm10167	5	-1	148182899	148184377	non-DE
ENSMUSG00000019302	0.50025	6.7679	9.08721	0.00257403	0.0183755	Atp6v0a1	11	1	101009452	101063719	non-DE
ENSMUSG00000018507	0.500085	7.37308	16.3331	5.31265e-05	0.00143986	Trpv2	11	1	62574486	62600515	non-DE
ENSMUSG00000021318	0.499573	0.915286	4.66489	0.0307854	0.0948321	Gli3	13	1	15463235	15730026	non-DE
ENSMUSG00000017756	0.499315	6.90444	5.55596	0.0184179	0.0679004	Slc12a7	13	1	73733094	73816754	non-DE
ENSMUSG00000031386	0.499253	6.42925	6.14443	0.0131827	0.0548644	Hcfc1	X	-1	73942792	73966357	non-DE
ENSMUSG00000038146	0.499139	3.01579	4.52529	0.0333975	0.0999961	Notch3	17	-1	32120820	32166852	non-DE
ENSMUSG00000019214	0.498251	1.7832	14.2161	0.000162972	0.00293598	Chtf18	17	-1	25718926	25727419	non-DE
ENSMUSG00000004356	0.498187	4.10284	7.55958	0.00596918	0.0322568	Utp20	10	-1	88746607	88826804	non-DE
ENSMUSG00000055717	0.497892	0.428994	4.67427	0.0306177	0.0944992	Slain1	14	1	103650228	103704907	non-DE
ENSMUSG00000059401	0.497712	1.32548	6.08204	0.0136563	0.0561513	Mamld1	X	1	71050256	71156056	non-DE
ENSMUSG00000041729	0.497465	2.65924	10.3493	0.00129526	0.0119801	Coro2b	9	-1	62419492	62537044	non-DE
ENSMUSG00000020898	0.497195	3.9328	10.6229	0.00111696	0.0108349	Ctc1	11	1	69015911	69036473	non-DE
ENSMUSG00000040711	0.496779	3.26564	5.03445	0.0248479	0.0821474	Sh3pxd2b	11	1	32347820	32428173	non-DE
ENSMUSG00000042784	0.496607	7.38041	10.5642	0.00115299	0.0110397	Muc1	3	1	89229057	89233381	non-DE
ENSMUSG00000027242	0.496506	3.04294	18.2496	1.93762e-05	0.000773265	Wdr76	2	1	121506723	121544860	non-DE
ENSMUSG00000041362	0.496503	5.01222	17.8035	2.44934e-05	0.000904403	Shtn1	19	-1	58973356	59076100	non-DE
ENSMUSG00000040035	0.496197	1.16684	5.45564	0.0195053	0.0701715	Disp2	2	1	118779719	118811293	non-DE
ENSMUSG00000056380	0.495842	6.48576	13.477	0.000241499	0.00389873	Gpr50	X	1	71663667	71669257	non-DE
ENSMUSG00000040383	0.495563	4.94581	6.70887	0.00959347	0.0445988	Aqr	2	-1	114101170	114187024	non-DE
ENSMUSG00000056492	0.495404	8.87912	11.2491	0.000796608	0.00869262	Adgrf5	17	1	43360451	43459557	non-DE
ENSMUSG00000046574	0.495395	5.06762	5.96071	0.0146281	0.0586662	Prr12	7	-1	45027563	45052881	non-DE
ENSMUSG00000019947	0.495182	5.93252	6.54533	0.010516	0.0473478	Arid5b	10	-1	68092520	68278740	non-DE
ENSMUSG00000027784	0.495042	2.59356	12.2474	0.000465894	0.00605021	Ppm1l	3	1	69316861	69560802	non-DE
ENSMUSG00000017550	0.494635	2.90937	13.5381	0.000233769	0.00378257	Atad5	11	1	80089400	80135794	non-DE
ENSMUSG00000079260	0.494198	3.61766	5.79794	0.0160449	0.0621131	Tmppe	9	1	114401105	114407276	non-DE
ENSMUSG00000034282	0.494196	3.51392	1.87664	0.170716	0.295975	Evpl	11	-1	116220559	116238077	non-DE
ENSMUSG00000004099	0.493631	6.05983	4.90131	0.0268363	0.0862739	Dnmt1	9	-1	20907209	20959888	non-DE
ENSMUSG00000032068	0.493626	7.46802	21.129	4.29383e-06	0.000272302	Plet1	9	1	50494525	50505482	non-DE
ENSMUSG00000018417	0.49347	7.17704	16.5905	4.63828e-05	0.00132391	Myo1b	1	-1	51749765	51916071	non-DE
ENSMUSG00000058325	0.493319	4.86021	7.32188	0.006812	0.0353006	Dock1	7	1	134670654	135173639	non-DE
ENSMUSG00000024620	0.492503	6.87894	5.46142	0.0194408	0.0700757	Pdgfrb	18	1	61045150	61085061	non-DE
ENSMUSG00000040488	0.491841	2.41246	2.31867	0.127829	0.24155	Ltbp4	7	-1	27305136	27337692	non-DE
ENSMUSG00000024891	0.491834	3.0441	13.0912	0.00029669	0.0044709	Slc29a2	19	1	5023860	5031972	non-DE
ENSMUSG00000048911	0.491727	3.51639	7.44572	0.00635875	0.0336421	Rnf24	2	-1	131298064	131352892	non-DE
ENSMUSG00000079575	0.491639	-0.124532	5.30068	0.0213171	0.0742893	Rbpj-ps3	6	-1	46529354	46530794	non-DE
ENSMUSG00000031538	0.491624	7.1747	21.1807	4.17947e-06	0.000267448	Plat	8	1	22757727	22782844	non-DE
ENSMUSG00000045333	0.491449	3.37959	10.1602	0.00143506	0.0127909	Zfp423	8	-1	87661810	87959595	non-DE
ENSMUSG00000028312	0.491116	4.05818	27.4032	1.65156e-07	2.59515e-05	Smc2	4	1	52439243	52488260	non-DE
ENSMUSG00000072934	0.49083	1.56855	11.4853	0.000701502	0.00807213	Trpc5os	X	1	144456581	144477066	non-DE
ENSMUSG00000037111	0.490719	5.67917	4.93083	0.0263817	0.0854535	Setd7	3	-1	51515319	51560879	non-DE
ENSMUSG00000034342	0.490427	5.17005	5.17513	0.0229125	0.0777607	Cbl	9	-1	44142976	44234049	non-DE
ENSMUSG00000031503	0.490249	9.24166	1.96266	0.161229	0.283559	Col4a2	8	1	11312805	11449287	non-DE
ENSMUSG00000063060	0.489674	3.10374	9.66535	0.00187776	0.0152159	Sox7	14	1	63943673	63950732	non-DE
ENSMUSG00000001930	0.489648	3.45589	5.55327	0.0184462	0.0679869	Vwf	6	1	125546774	125686679	non-DE
ENSMUSG00000006134	0.489511	5.45125	13.2567	0.000271602	0.00421624	Crkl	16	1	17451987	17487434	non-DE
ENSMUSG00000028799	0.4892	4.94558	7.52683	0.00607869	0.0326175	Zfp362	4	-1	128773088	128806045	non-DE
ENSMUSG00000020067	0.488819	1.36485	5.34205	0.020817	0.0732142	Mypn	10	-1	63115795	63203952	non-DE
ENSMUSG00000058290	0.488783	2.07736	7.52995	0.00606816	0.0325801	Espl1	15	1	102296266	102324357	non-DE
ENSMUSG00000040549	0.488742	5.05236	8.5165	0.00351941	0.0226486	Ckap5	2	1	91526762	91620664	non-DE
ENSMUSG00000101439	0.488335	0.147345	3.35535	0.0669871	0.157553	Gm336	19	-1	11090598	11092077	non-DE
ENSMUSG00000025047	0.488197	4.4416	5.31203	0.0211786	0.0740441	Pdcd11	19	1	47090768	47131865	non-DE
ENSMUSG00000039410	0.487411	1.56317	6.64259	0.00995691	0.0457772	Prdm16	4	-1	154316125	154636873	non-DE
ENSMUSG00000091957	0.487319	3.38496	1.55549	0.212327	0.34505	Rps2-ps10	18	-1	61259008	61259972	non-DE
ENSMUSG00000026620	0.487233	3.06888	13.8851	0.000194333	0.00331913	Mark1	1	-1	184896789	184999570	non-DE
ENSMUSG00000020357	0.486286	4.33352	2.78389	0.0952165	0.198197	Flt4	11	1	49609263	49652739	non-DE
ENSMUSG00000028433	0.486241	6.51097	5.60158	0.0179443	0.066711	Ubap2	4	-1	41194313	41275144	non-DE
ENSMUSG00000056174	0.485836	1.71897	5.48113	0.0192229	0.0695446	Col8a2	4	1	126286793	126314330	non-DE
ENSMUSG00000020899	0.485801	3.20717	9.89766	0.00165489	0.0140068	Pfas	11	-1	68985697	69008460	non-DE
ENSMUSG00000006056	0.483781	0.0200585	1.88483	0.169786	0.294658	Calcoco2	11	-1	96099326	96111964	non-DE
ENSMUSG00000034394	0.483731	0.897563	9.56668	0.00198141	0.0157157	Lif	11	1	4257557	4272514	non-DE
ENSMUSG00000031520	0.483135	0.386971	7.82963	0.00513966	0.0294	Vegfc	8	1	54077606	54187096	non-DE
ENSMUSG00000031502	0.482621	10.1883	2.04789	0.152417	0.272604	Col4a1	8	-1	11198423	11312826	non-DE
ENSMUSG00000034480	0.482505	4.71766	9.59245	0.00195379	0.0156105	Diaph2	X	1	129749742	130465834	non-DE
ENSMUSG00000061013	0.482476	0.518497	9.22026	0.00239352	0.0176737	Mkx	18	-1	6934518	7004780	non-DE
ENSMUSG00000001510	0.482446	6.64347	14.0652	0.000176578	0.0031068	Dlx3	11	1	95120119	95125296	non-DE
ENSMUSG00000039116	0.482364	7.16543	9.25929	0.00234304	0.0174213	Adgrg6	10	-1	14402583	14545659	non-DE
ENSMUSG00000038178	0.482271	5.68364	7.60852	0.00580933	0.0317571	Slc43a2	11	1	75531694	75577575	non-DE
ENSMUSG00000053646	0.481281	7.20929	8.97565	0.00273601	0.0191928	Plxnb1	9	1	109095389	109119917	non-DE
ENSMUSG00000026116	0.481109	5.03587	4.48891	0.0341155	0.101297	Tmem131	1	-1	36792191	36943666	non-DE
ENSMUSG00000039087	0.480583	5.77924	4.94004	0.0262415	0.0851897	Rreb1	13	1	37778400	37952005	non-DE
ENSMUSG00000059179	0.479742	0.864417	1.88729	0.169507	0.294457	Gm8991	5	-1	16729996	16731070	non-DE
ENSMUSG00000002900	0.479717	7.60042	2.96111	0.0852893	0.184324	Lamb1	12	1	31265234	31329644	non-DE
ENSMUSG00000028587	0.479493	1.69409	7.34268	0.00673362	0.0350099	Orc1	4	1	108579423	108614833	non-DE
ENSMUSG00000031111	0.4793	4.47995	8.30229	0.00395951	0.0246617	Igsf1	X	-1	49782536	49797749	non-DE
ENSMUSG00000035726	0.479126	4.9484	8.10545	0.00441324	0.0265695	Supt16	14	-1	52160414	52197416	non-DE
ENSMUSG00000035284	0.478558	4.21917	4.01851	0.0450035	0.121365	Vps13c	9	1	67840396	67995638	non-DE
ENSMUSG00000073408	0.478518	2.20069	4.58636	0.0322275	0.0976834	Mucl3	17	-1	35635752	35643695	non-DE
ENSMUSG00000059336	0.477845	2.62225	6.53829	0.0105577	0.0474441	Slc14a1	18	-1	78100091	78142119	non-DE
ENSMUSG00000042520	0.47782	6.84267	7.88196	0.00499304	0.0288211	Ubap2l	3	-1	90000140	90052628	non-DE
ENSMUSG00000027200	0.477102	4.51986	3.55166	0.0594861	0.145838	Sema6d	2	1	124089969	124667770	non-DE
ENSMUSG00000001507	0.476972	7.47521	5.82555	0.015795	0.0614627	Itga3	11	-1	95044474	95076801	non-DE
ENSMUSG00000041147	0.476758	2.05118	8.27027	0.00402995	0.0249416	Brca2	5	1	150522630	150570329	non-DE
ENSMUSG00000038759	0.476725	5.2796	12.5182	0.000402998	0.00547999	Nup205	6	1	35177421	35247596	non-DE
ENSMUSG00000024731	0.476449	1.25717	1.79781	0.179978	0.307063	Ms4a10	19	-1	10962293	10974670	non-DE
ENSMUSG00000074818	0.475302	0.840073	8.4938	0.00356359	0.0228866	Pdzd7	19	-1	45026906	45045717	non-DE
ENSMUSG00000061186	0.475001	7.47403	5.32557	0.0210147	0.0736714	Sfmbt2	2	1	10370510	10595253	non-DE
ENSMUSG00000070733	0.474968	4.66787	3.3681	0.0664705	0.156828	Fryl	5	-1	73019987	73256619	non-DE
ENSMUSG00000017639	0.474345	6.09197	8.90452	0.00284465	0.0196815	Rab11fip4	11	1	79591212	79698023	non-DE
ENSMUSG00000034112	0.473355	1.84961	7.70424	0.00550914	0.0306854	Atp2c2	8	1	119700009	119757717	non-DE
ENSMUSG00000026622	0.473353	2.66649	14.9749	0.000108953	0.00227594	Nek2	1	1	191821444	191833050	non-DE
ENSMUSG00000027340	0.473242	5.57375	6.33131	0.0118625	0.0512555	Slc23a2	2	-1	132052496	132145108	non-DE
ENSMUSG00000024613	0.472289	3.84319	6.10679	0.0134663	0.0556357	Tcof1	18	-1	60813755	60848971	non-DE
ENSMUSG00000066878	0.472037	0.54669	7.30725	0.00686768	0.03555	Gm10184	17	-1	89908462	89910449	non-DE
ENSMUSG00000020902	0.471895	4.85234	4.85222	0.0276105	0.0879036	Ntn1	11	-1	68209364	68400823	non-DE
ENSMUSG00000034303	0.471874	0.424132	6.94104	0.008424	0.0410517	Ccdc15	9	-1	37275835	37348432	non-DE
ENSMUSG00000053063	0.471646	1.80625	0.678399	0.410139	0.545951	Clec12a	6	1	129342691	129365303	non-DE
ENSMUSG00000078141	0.471567	2.52457	9.32878	0.00225583	0.0169889	Gm2399	13	1	12702362	12702586	non-DE
ENSMUSG00000032220	0.471509	5.96516	4.99867	0.0253667	0.0831756	Myo1e	9	1	70207350	70399766	non-DE
ENSMUSG00000040524	0.470882	5.10823	5.18205	0.0228214	0.0776377	Zfp609	9	-1	65692391	65827564	non-DE
ENSMUSG00000023927	0.470822	2.51701	10.005	0.00156114	0.013497	Satb1	17	-1	51736187	51833290	non-DE
ENSMUSG00000035356	0.470273	4.21096	19.4598	1.02738e-05	0.000484309	Nfkbiz	16	-1	55811375	55838899	non-DE
ENSMUSG00000030279	0.469216	5.21731	17.4487	2.95165e-05	0.00105144	C2cd5	6	-1	143010920	143100141	non-DE
ENSMUSG00000032300	0.467828	5.90054	9.81172	0.00173403	0.0144907	1700017B05Rik	9	-1	57253117	57262612	non-DE
ENSMUSG00000063354	0.467678	5.21654	15.2018	9.66097e-05	0.00213144	Slc39a4	15	-1	76612383	76617384	non-DE
ENSMUSG00000038025	0.467488	6.03517	5.92261	0.0149478	0.0595806	Phf2	13	-1	48801750	48871119	non-DE
ENSMUSG00000042116	0.46662	0.711877	7.71416	0.00547892	0.0306086	Vwa1	4	-1	155768149	155774698	non-DE
ENSMUSG00000100514	0.466313	4.0243	4.95087	0.0260776	0.0847791	Gm12960	4	-1	111807358	111808423	non-DE
ENSMUSG00000054720	0.465898	4.99809	9.97495	0.00158684	0.013642	Lrrc8c	5	1	105519388	105613018	non-DE
ENSMUSG00000052911	0.465871	7.21174	5.50028	0.0190134	0.0691726	Lamb2	9	1	108479736	108490530	non-DE
ENSMUSG00000020272	0.465389	4.98656	4.46457	0.0346047	0.102188	Stk10	11	1	32533305	32624587	non-DE
ENSMUSG00000026355	0.465207	5.00337	23.6551	1.15243e-06	9.81785e-05	Mcm6	1	-1	128331590	128359664	non-DE
ENSMUSG00000025001	0.465192	3.14982	16.937	3.86402e-05	0.00119573	Hells	19	1	38930915	38971051	non-DE
ENSMUSG00000090673	0.464737	3.72751	6.67749	0.0097638	0.0451683	Gm340	19	1	41582370	41586536	non-DE
ENSMUSG00000037572	0.464736	3.30047	16.6106	4.58927e-05	0.00132225	Wdhd1	14	-1	47240944	47276857	non-DE
ENSMUSG00000030766	0.464734	5.57288	9.22599	0.00238604	0.0176596	Arhgap17	7	-1	123279218	123369915	non-DE
ENSMUSG00000035247	0.464598	6.30842	4.85671	0.0275388	0.0877545	Hectd1	12	-1	51743722	51829536	non-DE
ENSMUSG00000029094	0.463938	6.69167	6.09743	0.0135379	0.0558822	Afap1	5	1	35893319	36003923	non-DE
ENSMUSG00000001552	0.463717	8.63452	5.84584	0.0156139	0.0610651	Jup	11	-1	100368958	100397763	non-DE
ENSMUSG00000001855	0.462954	4.41927	4.90928	0.0267128	0.0860724	Nup214	2	1	31974436	32053975	non-DE
ENSMUSG00000030681	0.462445	7.28585	5.28815	0.021471	0.0745309	Mvp	7	-1	126986860	127014621	non-DE
ENSMUSG00000013629	0.462291	3.71883	5.50456	0.018967	0.0690783	Cad	5	1	31054780	31078479	non-DE
ENSMUSG00000040918	0.462282	6.28368	16.729	4.31169e-05	0.00129201	Slc19a2	1	1	164249046	164265385	non-DE
ENSMUSG00000034187	0.461961	6.79835	9.12976	0.00251484	0.0181779	Nsf	11	-1	103821782	103954056	non-DE
ENSMUSG00000071369	0.461658	3.41902	7.16008	0.00745441	0.0377039	Map3k5	10	1	19934472	20142753	non-DE
ENSMUSG00000059273	0.461565	5.26908	6.28864	0.0121515	0.0520272	Zc3h4	7	1	16400910	16437696	non-DE
ENSMUSG00000051817	0.461467	1.95938	9.35784	0.00222033	0.0168726	Sox12	2	-1	152393611	152398063	non-DE
ENSMUSG00000025558	0.461455	6.50815	9.54592	0.00200394	0.0158009	Dock9	14	-1	121542046	121797837	non-DE
ENSMUSG00000040183	0.461153	3.36199	15.4201	8.60694e-05	0.0019825	Ankrd6	4	-1	32804035	32950841	non-DE
ENSMUSG00000007817	0.460943	7.07135	4.9218	0.0265199	0.085744	Zmiz1	14	1	25459185	25666743	non-DE
ENSMUSG00000027322	0.460886	1.03751	4.54973	0.032924	0.0991505	Siglec1	2	-1	131069220	131086765	non-DE
ENSMUSG00000025203	0.460181	7.24018	4.90996	0.0267022	0.086063	Scd2	19	1	44293674	44306864	non-DE
ENSMUSG00000024222	0.460152	5.12098	11.6643	0.000637103	0.00753968	Fkbp5	17	-1	28399094	28517527	non-DE
ENSMUSG00000031781	0.459976	6.26605	6.3843	0.0115134	0.050275	Ciapin1	8	-1	94819804	94838358	non-DE
ENSMUSG00000039738	0.459971	4.76616	7.21366	0.00723508	0.0368582	Slx4	16	-1	3979105	4003770	non-DE
ENSMUSG00000044835	0.458557	2.77213	7.05209	0.00791727	0.0393277	Ankrd45	1	1	161142691	161170498	non-DE
ENSMUSG00000031758	0.458246	2.21045	7.63164	0.00573531	0.0315101	Cdyl2	8	-1	116574400	116732991	non-DE
ENSMUSG00000026024	0.458086	5.73755	6.19485	0.0128123	0.0538137	Als2	1	-1	59162926	59237231	non-DE
ENSMUSG00000021066	0.457766	2.9277	12.3207	0.000447973	0.00589324	Atl1	12	1	69892614	69966417	non-DE
ENSMUSG00000034601	0.457587	2.59554	9.2797	0.00231707	0.0172736	2700049A03Rik	12	1	71136848	71243303	non-DE
ENSMUSG00000057914	0.457421	1.70483	11.7432	0.000610653	0.00733095	Cacnb2	2	1	14603088	14987908	non-DE
ENSMUSG00000005370	0.457318	4.31398	13.6509	0.00022013	0.00361565	Msh6	17	1	87975062	87990892	non-DE
ENSMUSG00000039414	0.457181	4.06553	4.19204	0.0406142	0.113198	Heatr5b	17	-1	78752898	78835364	non-DE
ENSMUSG00000033732	0.4568	6.16951	9.58513	0.0019616	0.015611	Sf3b3	8	-1	110810239	110846787	non-DE
ENSMUSG00000040697	0.456022	5.19875	6.59264	0.0102401	0.0466492	Dnajc16	4	-1	141760189	141790931	non-DE
ENSMUSG00000071176	0.455406	4.79971	7.37911	0.00659859	0.0345276	Arhgef10	8	1	14911663	15001085	non-DE
ENSMUSG00000006398	0.455402	3.6577	17.2602	3.25948e-05	0.00110277	Cdc20	4	-1	118432901	118437352	non-DE
ENSMUSG00000037025	0.45507	1.69567	6.55339	0.0104685	0.0472932	Foxa2	2	-1	148042877	148046969	non-DE
ENSMUSG00000047497	0.454977	0.734073	3.85203	0.0496858	0.129308	Adamts12	15	1	11064790	11349231	non-DE
ENSMUSG00000022391	0.45491	6.3688	15.1259	0.000100576	0.00218685	Rangap1	15	-1	81704248	81745530	non-DE
ENSMUSG00000024002	0.454887	6.42389	5.30609	0.0212511	0.074205	Brd4	17	-1	32196274	32284722	non-DE
ENSMUSG00000048537	0.454865	6.29052	9.09473	0.00256346	0.0183186	Phldb1	9	-1	44686304	44735198	non-DE
ENSMUSG00000060012	0.454766	6.08985	6.83457	0.00894103	0.0426599	Kif13b	14	1	64647265	64809617	non-DE
ENSMUSG00000030739	0.454652	2.00479	2.03137	0.154082	0.274424	Myh14	7	-1	44605803	44670843	non-DE
ENSMUSG00000085860	0.454542	2.49154	5.62826	0.0176731	0.0661383	2410003L11Rik	11	1	97598511	97622893	non-DE
ENSMUSG00000030207	0.454346	2.28741	5.42919	0.0198028	0.070776	Fam234b	6	1	135197977	135244955	non-DE
ENSMUSG00000005836	0.45393	2.7	7.75873	0.00534535	0.0301652	Gata6	18	1	11052064	11085635	non-DE
ENSMUSG00000003534	0.453779	8.03721	6.41687	0.0113041	0.049616	Ddr1	17	-1	35681567	35704621	non-DE
ENSMUSG00000024727	0.453772	4.80562	10.6682	0.0010899	0.0106651	Trpm6	19	1	18749983	18892511	non-DE
ENSMUSG00000015133	0.453494	3.01755	6.45111	0.0110883	0.0489574	Lrrk1	7	-1	66226912	66388350	non-DE
ENSMUSG00000032842	0.452993	3.82023	7.87412	0.00501474	0.0289093	Abcc10	17	-1	46303221	46328352	non-DE
ENSMUSG00000022463	0.452941	5.85122	5.3183	0.0211026	0.073906	Srebf2	15	1	82147181	82205379	non-DE
ENSMUSG00000041445	0.452845	3.61453	8.22112	0.00414056	0.025412	Mmrn2	14	1	34375465	34404287	non-DE
ENSMUSG00000050138	0.452702	-0.00575347	1.8008	0.179616	0.306688	Kcnk12	17	-1	87745801	87797994	non-DE
ENSMUSG00000032571	0.452449	4.71742	6.41744	0.0113005	0.0496155	Pik3r4	9	1	105642978	105687657	non-DE
ENSMUSG00000042605	0.452373	5.62849	6.03464	0.0140278	0.0570718	Atxn2	5	1	121711337	121816493	non-DE
ENSMUSG00000060445	0.452244	0.379446	3.60457	0.057621	0.142806	Sycp2	2	-1	178345293	178407685	non-DE
ENSMUSG00000031996	0.452144	9.05024	8.34416	0.00386929	0.0242229	Aplp2	9	-1	31149557	31211815	non-DE
ENSMUSG00000068566	0.452131	7.05346	5.88306	0.0152872	0.0604564	Myadm	7	1	3289080	3300442	non-DE
ENSMUSG00000040033	0.45187	5.16479	16.0766	6.0832e-05	0.00156416	Stat2	10	1	128270559	128292849	non-DE
ENSMUSG00000064302	0.451743	5.11757	6.88012	0.00871598	0.0419685	Clasp1	1	1	118389058	118612678	non-DE
ENSMUSG00000057530	0.451552	5.19132	5.82472	0.0158025	0.0614627	Ece1	4	1	137862237	137965229	non-DE
ENSMUSG00000071669	0.451535	2.58049	6.29137	0.0121327	0.0520099	Snx29	16	1	11322908	11755472	non-DE
ENSMUSG00000075415	0.451479	5.5461	12.9403	0.000321589	0.00469826	Fnbp1	2	-1	31026206	31142008	non-DE
ENSMUSG00000007034	0.45111	3.9039	8.7579	0.00308264	0.0207189	Slc44a4	17	1	34914466	34930436	non-DE
ENSMUSG00000047248	0.450971	3.64241	4.43568	0.0351952	0.103195	C2cd3	7	1	100372233	100470152	non-DE
ENSMUSG00000039501	0.450667	5.16897	5.65762	0.0173797	0.0654616	Znfx1	2	-1	167035793	167063015	non-DE
ENSMUSG00000006005	0.450381	6.45406	6.17903	0.0129273	0.0541203	Tpr	1	1	150392838	150449935	non-DE
ENSMUSG00000013584	0.450134	2.84464	6.00534	0.0142627	0.0576594	Aldh1a2	9	1	71215789	71296243	non-DE
ENSMUSG00000027422	0.45	8.4676	4.93637	0.0262971	0.0852968	Rrbp1	2	-1	143947395	144011263	non-DE
ENSMUSG00000029070	0.449959	4.38528	13.7053	0.000213854	0.00353582	Mxra8	4	1	155839680	155844088	non-DE
ENSMUSG00000020075	0.449797	5.60853	8.60212	0.00335771	0.0219355	Ddx21	10	-1	62580251	62602281	non-DE
ENSMUSG00000029167	0.44941	1.04883	4.41732	0.0355759	0.103735	Ppargc1a	5	-1	51454250	51567726	non-DE
ENSMUSG00000021594	0.449172	5.35936	5.18362	0.0228008	0.0776377	Srd5a1	13	-1	69573449	69611442	non-DE
ENSMUSG00000038267	0.448956	7.01251	6.27926	0.0122159	0.0521768	Slc22a23	13	-1	34179158	34345182	non-DE
ENSMUSG00000038545	0.448873	7.33667	5.66641	0.0172928	0.0653019	Cul7	17	1	46650337	46664364	non-DE
ENSMUSG00000052040	0.448695	7.05839	6.50341	0.0107668	0.0480783	Klf13	7	-1	63886351	63938915	non-DE
ENSMUSG00000070047	0.448404	5.05995	3.41077	0.0647721	0.154214	Fat1	8	1	44935447	45052257	non-DE
ENSMUSG00000041773	0.447941	5.57609	11.924	0.000554141	0.00685023	Enc1	13	1	97241105	97253034	non-DE
ENSMUSG00000019849	0.447771	6.56705	14.2462	0.000160386	0.00289678	Prep	10	1	45067203	45167198	non-DE
ENSMUSG00000034349	0.447631	5.44451	23.1794	1.47572e-06	0.000119255	Smc4	3	1	69004738	69034623	non-DE
ENSMUSG00000026235	0.447511	2.65072	7.77702	0.0052915	0.0299569	Epha4	1	-1	77367185	77515088	non-DE
ENSMUSG00000023828	0.447425	6.82077	9.5472	0.00200255	0.0158009	Slc22a3	17	-1	12418960	12507704	non-DE
ENSMUSG00000037313	0.447321	4.0914	16.2853	5.44837e-05	0.00146207	Tacc3	5	1	33658128	33678995	non-DE
ENSMUSG00000061731	0.447115	6.41658	17.0985	3.54902e-05	0.00115027	Ext1	15	-1	53064038	53346159	non-DE
ENSMUSG00000026062	0.446957	4.02595	19.8188	8.51422e-06	0.000430029	Slc9a2	1	1	40680574	40769273	non-DE
ENSMUSG00000023991	0.446854	5.94535	7.94651	0.00481802	0.0281357	Foxp4	17	-1	47867133	47924645	non-DE
ENSMUSG00000003051	0.44674	5.46385	11.3358	0.000760277	0.0084527	Elf3	1	-1	135253575	135258568	non-DE
ENSMUSG00000042292	0.446706	4.788	5.64313	0.0175239	0.0658052	Mrtfa	15	-1	81012281	81190757	non-DE
ENSMUSG00000016256	0.446564	6.81008	10.6052	0.00112772	0.0108838	Ctsz	2	-1	174427493	174439039	non-DE
ENSMUSG00000029661	0.446157	6.57844	3.1693	0.0750345	0.16943	Col1a2	6	1	4504814	4541544	non-DE
ENSMUSG00000034413	0.445921	2.5952	2.08767	0.148493	0.267719	Neurl1b	17	1	26414829	26446349	non-DE
ENSMUSG00000042190	0.445876	4.49568	4.92046	0.0265405	0.0857524	Cmklr1	5	-1	113612354	113650426	non-DE
ENSMUSG00000000317	0.445861	2.09563	10.187	0.00141433	0.0126784	Bcl6b	11	-1	70224128	70229798	non-DE
ENSMUSG00000050107	0.445661	0.457625	7.46745	0.00628244	0.0333883	Haspin	11	-1	73135485	73138294	non-DE
ENSMUSG00000036959	0.44547	4.37292	3.96942	0.0463337	0.123632	Bcorl1	X	1	48341358	48408049	non-DE
ENSMUSG00000035390	0.445393	0.7165	4.10117	0.0428536	0.117449	Brsk1	7	1	4690604	4715997	non-DE
ENSMUSG00000026234	0.445299	8.11156	7.70426	0.00550907	0.0306854	Ncl	1	-1	86344719	86359400	non-DE
ENSMUSG00000042453	0.445253	1.02441	7.18844	0.00733746	0.037259	Reln	5	-1	21884454	22344702	non-DE
ENSMUSG00000025555	0.445117	5.80242	10.8915	0.000966073	0.00985018	Farp1	14	1	121035200	121283744	non-DE
ENSMUSG00000024301	0.444834	1.44139	9.22786	0.0023836	0.0176578	Kifc5b	17	1	26917091	26932583	non-DE
ENSMUSG00000020183	0.444778	4.89876	15.1192	0.000100933	0.00218685	Cpm	10	1	117629500	117687352	non-DE
ENSMUSG00000029561	0.444674	4.56495	7.63098	0.00573741	0.0315101	Oasl2	5	1	114896936	114912234	non-DE
ENSMUSG00000105692	0.444596	2.2261	6.80861	0.00907194	0.0429888	Gm43737	3	1	89210425	89213164	non-DE
ENSMUSG00000084183	0.444502	0.297141	4.05935	0.0439273	0.119493	Gm12009	11	1	15049158	15050257	non-DE
ENSMUSG00000001473	0.444053	4.48043	11.2002	0.000817906	0.00881618	Tubb6	18	1	67390717	67402749	non-DE
ENSMUSG00000026782	0.443992	5.65557	20.7237	5.30552e-06	0.000315944	Abi2	1	1	60409619	60481158	non-DE
ENSMUSG00000031227	0.443877	1.0907	9.49075	0.00206511	0.0160819	Magee1	X	1	105120378	105123927	non-DE
ENSMUSG00000030527	0.443326	4.75646	4.67339	0.0306333	0.0945268	Crtc3	7	-1	80586627	80688877	non-DE
ENSMUSG00000000693	0.443301	0.934316	8.20652	0.00417401	0.0255647	Loxl3	6	1	83034173	83052562	non-DE
ENSMUSG00000034645	0.442948	1.82788	7.41307	0.00647519	0.0340872	Zyg11a	4	-1	108181738	108218048	non-DE
ENSMUSG00000040363	0.442864	5.38453	4.46266	0.0346435	0.10226	Bcor	X	-1	12036740	12160355	non-DE
ENSMUSG00000047888	0.442674	3.42523	3.98582	0.0458848	0.122875	Tnrc6b	15	1	80711313	80941085	non-DE
ENSMUSG00000048120	0.442569	7.52669	15.0236	0.000106178	0.00224785	Entpd1	19	1	40612366	40741602	non-DE
ENSMUSG00000025154	0.442069	2.78625	13.7147	0.000212784	0.00353582	Arhgap19	19	-1	41766588	41802047	non-DE
ENSMUSG00000000276	0.441315	4.78614	12.5424	0.000397817	0.00544093	Dgke	11	-1	89035179	89066850	non-DE
ENSMUSG00000024206	0.441273	0.552374	4.54484	0.0330182	0.0992862	Rfx2	17	-1	56775897	56831013	non-DE
ENSMUSG00000003233	0.441144	5.83436	5.75645	0.0164282	0.0631325	Dvl3	16	1	20516982	20534010	non-DE
ENSMUSG00000082791	0.440857	1.72633	6.44065	0.0111538	0.0491851	Gm4875	6	1	117997207	117997992	non-DE
ENSMUSG00000025812	0.440739	6.575	7.98666	0.00471232	0.0276866	Pard3	8	1	127063893	127612286	non-DE
ENSMUSG00000032911	0.440591	1.55582	4.29665	0.0381875	0.108618	Cspg4	9	1	56865033	56899870	non-DE
ENSMUSG00000020747	0.440555	6.61798	6.8306	0.00896094	0.0427117	Tmem94	11	1	115765433	115799366	non-DE
ENSMUSG00000062444	0.440339	3.51987	8.18383	0.00422653	0.0257747	Ap3b2	7	-1	81460399	81493925	non-DE
ENSMUSG00000022094	0.440332	8.62679	16.1408	5.88022e-05	0.00152584	Slc39a14	14	-1	70303469	70351425	non-DE
ENSMUSG00000074738	0.440181	2.58427	7.81482	0.00518194	0.0295258	Fndc10	4	1	155694342	155696481	non-DE
ENSMUSG00000073405	0.440131	1.57622	3.79781	0.0513198	0.132005	H2-T-ps	17	-1	36109234	36111658	non-DE
ENSMUSG00000022335	0.439968	3.89036	10.3275	0.00131061	0.0120466	Zfat	15	-1	68083764	68258856	non-DE
ENSMUSG00000020099	0.439776	7.03541	5.04743	0.0246625	0.0818535	Unc5b	10	-1	60762593	60831581	non-DE
ENSMUSG00000000787	0.439257	8.41526	7.30545	0.00687459	0.0355728	Ddx3x	X	1	13280970	13294052	non-DE
ENSMUSG00000021965	0.4391	1.83819	5.87092	0.015393	0.0606712	Ska3	14	-1	57806561	57826185	non-DE
ENSMUSG00000021277	0.439098	4.94149	7.52382	0.00608883	0.0326422	Traf3	12	1	111166370	111267153	non-DE
ENSMUSG00000028435	0.438988	7.25088	20.6588	5.48839e-06	0.000322061	Aqp3	4	-1	41092722	41098183	non-DE
ENSMUSG00000062044	0.438563	1.02317	7.38354	0.00658236	0.0344769	Lmtk3	7	1	45783738	45804144	non-DE
ENSMUSG00000097245	0.438267	1.08047	7.33528	0.00676143	0.0351028	Gm5421	10	1	22343439	22345792	non-DE
ENSMUSG00000027326	0.438002	1.95422	8.98118	0.00272775	0.0191661	Knl1	2	1	119047119	119105501	non-DE
ENSMUSG00000024241	0.437892	5.99409	7.94629	0.0048186	0.0281357	Sos1	17	-1	80393751	80480453	non-DE
ENSMUSG00000004730	0.437757	0.321414	5.24428	0.022019	0.0758754	Adgre1	17	1	57358691	57483527	non-DE
ENSMUSG00000029710	0.437753	6.25734	9.34522	0.00223568	0.0169325	Ephb4	5	1	137350109	137378669	non-DE
ENSMUSG00000028854	0.437628	4.84227	4.37294	0.0365139	0.105513	Slc9a1	4	1	133369706	133423702	non-DE
ENSMUSG00000020331	0.437149	4.68028	7.14798	0.00750486	0.0378238	Hcn2	10	1	79716634	79736108	non-DE
ENSMUSG00000024812	0.436861	6.46081	5.24592	0.0219983	0.0758596	Tjp2	19	-1	24094505	24225030	non-DE
ENSMUSG00000030592	0.436832	-0.0386217	3.74801	0.0528703	0.134671	Ryr1	7	-1	29003344	29125179	non-DE
ENSMUSG00000024077	0.436748	5.6474	8.03734	0.00458227	0.0272508	Strn	17	-1	78649913	78737196	non-DE
ENSMUSG00000026556	0.436412	0.729232	6.57697	0.0103306	0.0469309	Vangl2	1	-1	172000960	172028444	non-DE
ENSMUSG00000039202	0.435383	7.47616	5.1807	0.0228392	0.0776422	Abhd2	7	1	79273199	79365508	non-DE
ENSMUSG00000030978	0.435271	5.56707	17.0139	3.7107e-05	0.00117398	Rrm1	7	1	102441695	102469771	non-DE
ENSMUSG00000096606	0.434812	1.34481	3.50997	0.0610006	0.1482	Tpbgl	7	-1	99624082	99627103	non-DE
ENSMUSG00000007880	0.434726	5.8227	3.45348	0.0631188	0.151654	Arid1a	4	-1	133679008	133756769	non-DE
ENSMUSG00000019734	0.434708	6.29286	11.7106	0.000621438	0.00739837	Tmc4	7	-1	3665790	3677553	non-DE
ENSMUSG00000037408	0.4346	3.38977	5.60766	0.0178821	0.0665915	Cnnm4	1	1	36471620	36508764	non-DE
ENSMUSG00000028405	0.434515	7.40314	12.2885	0.000455752	0.00595129	Aco1	4	1	40143081	40198338	non-DE
ENSMUSG00000041779	0.434192	6.30828	3.67952	0.0550846	0.13849	Tram2	1	-1	20996299	21079229	non-DE
ENSMUSG00000034382	0.433959	6.83103	5.77741	0.0162335	0.062688	AI661453	17	1	47436615	47470638	non-DE
ENSMUSG00000046139	0.433863	5.61825	8.89939	0.00285266	0.019708	Patl1	19	1	11912399	11945091	non-DE
ENSMUSG00000022387	0.433561	6.88092	6.04049	0.0139814	0.0569649	Brd1	15	-1	88687034	88734233	non-DE
ENSMUSG00000026768	0.433438	0.202916	4.97046	0.0257837	0.0840944	Itga8	2	-1	12106632	12301922	non-DE
ENSMUSG00000042207	0.433406	6.47287	6.44583	0.0111213	0.0490726	Kdm5b	1	1	134560171	134635285	non-DE
ENSMUSG00000019889	0.433283	5.26421	9.562	0.00198647	0.0157382	Ptprk	10	1	28074820	28597397	non-DE
ENSMUSG00000056481	0.432539	2.73123	5.46851	0.0193622	0.0698876	Cd248	19	1	5068078	5070682	non-DE
ENSMUSG00000022801	0.432416	5.34152	9.29621	0.00229629	0.0171912	Lrch3	16	1	32914100	33015647	non-DE
ENSMUSG00000025332	0.43217	6.96144	5.61061	0.0178521	0.066543	Kdm5c	X	1	152233020	152274535	non-DE
ENSMUSG00000033268	0.432074	-0.185042	2.83812	0.0920519	0.193873	Duox1	2	1	122315672	122347972	non-DE
ENSMUSG00000052212	0.431931	-0.0399887	6.47715	0.010927	0.0485333	Cd177	7	-1	24743983	24760311	non-DE
ENSMUSG00000023830	0.431901	7.53545	4.73723	0.0295166	0.0923503	Igf2r	17	-1	12682406	12769664	non-DE
ENSMUSG00000021944	0.43161	3.20294	5.74011	0.0165817	0.0634467	Gata4	14	-1	63198922	63271692	non-DE
ENSMUSG00000056310	0.431533	4.57557	11.433	0.000721521	0.00816432	Tyw1	5	1	130255619	130341563	non-DE
ENSMUSG00000026083	0.431297	7.34042	6.71996	0.009534	0.0444337	Eif5b	1	1	37998010	38055579	non-DE
ENSMUSG00000009621	0.431275	6.21214	7.84707	0.00509031	0.0291977	Vav2	2	-1	27262104	27427033	non-DE
ENSMUSG00000052353	0.431221	2.88535	3.64122	0.0563657	0.140751	Cemip	7	-1	83932857	84086502	non-DE
ENSMUSG00000035704	0.431181	4.04511	14.825	0.000117961	0.00237248	Alg8	7	1	97371606	97392185	non-DE
ENSMUSG00000028960	0.430732	5.59616	6.13531	0.0132508	0.055067	Ube4b	4	-1	149328416	149426749	non-DE
ENSMUSG00000021699	0.430585	2.13116	4.85292	0.0275993	0.0879036	Pde4d	13	1	108449948	109953461	non-DE
ENSMUSG00000091562	0.430583	3.37049	2.99027	0.0837661	0.182193	NA	NA	NA	NA	NA	non-DE
ENSMUSG00000033952	0.430486	1.56372	5.46238	0.0194302	0.0700757	Aspm	1	1	139454772	139494091	non-DE
ENSMUSG00000006498	0.430375	6.84882	9.31084	0.00227803	0.0170635	Ptbp1	10	1	79854427	79864771	non-DE
ENSMUSG00000041431	0.430332	3.74848	8.70466	0.00317398	0.0210806	Ccnb1	13	-1	100778650	100786570	non-DE
ENSMUSG00000041075	0.430183	5.2585	14.6175	0.000131688	0.00254062	Fzd7	1	1	59482424	59486955	non-DE
ENSMUSG00000027951	0.429996	5.19613	8.86243	0.00291099	0.0199744	Adar	3	1	89715022	89753446	non-DE
ENSMUSG00000026532	0.42978	0.261745	2.06465	0.150749	0.270511	Spta1	1	1	174172776	174248450	non-DE
ENSMUSG00000056014	0.429707	1.95021	12.4241	0.000423828	0.00569751	A430033K04Rik	5	1	138622859	138652414	non-DE
ENSMUSG00000039194	0.429581	0.533848	3.05851	0.0803153	0.177195	Rlbp1	7	-1	79374870	79387048	non-DE
ENSMUSG00000029231	0.429523	6.87187	6.88481	0.00869313	0.041908	Pdgfra	5	1	75152292	75198215	non-DE
ENSMUSG00000039481	0.429249	1.78804	4.33684	0.0372961	0.106844	Nrtn	17	-1	56751325	56757530	non-DE
ENSMUSG00000032010	0.429076	3.49016	6.9769	0.00825686	0.0404884	Usp2	9	1	44067021	44095627	non-DE
ENSMUSG00000002699	0.428609	0.366267	6.5473	0.0105043	0.0473478	Lcp2	11	1	34046920	34092295	non-DE
ENSMUSG00000015053	0.428591	7.35521	9.46113	0.00209872	0.016263	Gata2	6	1	88193891	88207032	non-DE
ENSMUSG00000042429	0.428584	2.14115	4.13983	0.0418853	0.115466	Adora1	1	-1	134199223	134235431	non-DE
ENSMUSG00000006574	0.428575	2.8809	5.72334	0.0167408	0.0638481	Slc4a1	11	-1	102348824	102366203	non-DE
ENSMUSG00000063952	0.428327	6.36544	7.52651	0.00607974	0.0326175	Brpf3	17	1	28801090	28839949	non-DE
ENSMUSG00000026483	0.428207	5.30639	6.64693	0.00993267	0.0457355	Fam129a	1	1	151571186	151721939	non-DE
ENSMUSG00000042496	0.428202	3.64706	8.67509	0.00322589	0.021318	Prdm10	9	1	31280538	31381723	non-DE
ENSMUSG00000063317	0.427974	5.72767	7.10348	0.00769346	0.0385	Usp31	7	-1	121642021	121707253	non-DE
ENSMUSG00000053754	0.427961	5.89945	6.41273	0.0113305	0.0496856	Chd8	14	-1	52198151	52257780	non-DE
ENSMUSG00000063455	0.427935	2.68271	3.16067	0.0754323	0.170138	D630045J12Rik	6	-1	38123174	38254009	non-DE
ENSMUSG00000036698	0.427576	6.5084	3.63118	0.0567065	0.141287	Ago2	15	-1	73095844	73184935	non-DE
ENSMUSG00000063550	0.427189	5.73677	6.49495	0.0108181	0.0482619	Nup98	7	-1	102119398	102210176	non-DE
ENSMUSG00000041229	0.426919	7.23507	7.03344	0.00800017	0.0395727	Phf8	X	1	151520672	151633859	non-DE
ENSMUSG00000020811	0.426789	2.53962	8.12474	0.00436653	0.0263557	Wscd1	11	1	71749920	71789647	non-DE
ENSMUSG00000089764	0.426759	0.476444	1.7601	0.184613	0.312632	Gm16580	17	1	26269337	26270384	non-DE
ENSMUSG00000031740	0.426636	2.3309	4.30141	0.0380807	0.108467	Mmp2	8	1	92827291	92853420	non-DE
ENSMUSG00000038970	0.426471	5.74629	3.88338	0.0487662	0.127722	Lmtk2	5	1	144100436	144188204	non-DE
ENSMUSG00000025278	0.426444	8.65886	4.33685	0.0372959	0.106844	Flnb	14	1	7817957	7951588	non-DE
ENSMUSG00000108352	0.426322	0.552184	1.67647	0.195394	0.325396	Usf2-ps1	7	-1	30926668	30927147	non-DE
ENSMUSG00000029772	0.426221	6.8584	9.37117	0.00220425	0.0168137	Ahcyl2	6	1	29768011	29912310	non-DE
ENSMUSG00000029330	0.425759	7.53921	22.032	2.68144e-06	0.000194466	Cds1	5	1	101765130	101823858	non-DE
ENSMUSG00000024593	0.425511	-0.0303797	5.18092	0.0228362	0.0776422	Megf10	18	1	57133090	57297467	non-DE
ENSMUSG00000039254	0.425334	4.38332	9.58734	0.00195924	0.015611	Pomt1	2	1	32236590	32255005	non-DE
ENSMUSG00000033768	0.42505	1.82876	8.62415	0.00331736	0.021775	Nrxn2	19	1	6418731	6544169	non-DE
ENSMUSG00000029581	0.424909	7.59577	5.26744	0.021728	0.075184	Fscn1	5	1	142960343	142973185	non-DE
ENSMUSG00000005871	0.424605	6.17337	6.3073	0.0120242	0.0517172	Apc	18	1	34220924	34322552	non-DE
ENSMUSG00000070348	0.424502	4.74295	10.4728	0.00121147	0.011437	Ccnd1	7	-1	144929931	144939925	non-DE
ENSMUSG00000020380	0.424202	3.37534	8.93216	0.00280193	0.0195197	Rad50	11	-1	53649519	53707319	non-DE
ENSMUSG00000015647	0.423962	7.52271	2.52366	0.11215	0.220896	Lama5	2	-1	180176373	180225859	non-DE
ENSMUSG00000026211	0.423895	7.31448	5.41	0.0200218	0.0711964	Obsl1	1	-1	75479310	75506452	non-DE
ENSMUSG00000044447	0.423686	6.8987	4.64404	0.0311615	0.0955314	Dock5	14	-1	67752135	67933442	non-DE
ENSMUSG00000066306	0.423584	6.79475	4.65071	0.0310407	0.0952649	Numa1	7	1	101934111	102014964	non-DE
ENSMUSG00000027194	0.422822	5.22771	5.05723	0.0245234	0.0815447	Ttc17	2	-1	94300767	94406689	non-DE
ENSMUSG00000055491	0.422632	5.21655	3.90534	0.0481328	0.12657	Pprc1	19	1	46044886	46072915	non-DE
ENSMUSG00000026779	0.422159	2.11689	11.2034	0.000816477	0.00881072	Mastl	2	-1	23115606	23156024	non-DE
ENSMUSG00000046470	0.422021	3.46305	9.36287	0.00221425	0.0168605	Sox18	2	-1	181669836	181671640	non-DE
ENSMUSG00000026657	0.421356	6.06417	2.78856	0.0949397	0.197883	Frmd4a	2	1	4017717	4614043	non-DE
ENSMUSG00000041064	0.421144	0.181272	4.54617	0.0329924	0.0992862	Pif1	9	1	65587160	65595967	non-DE
ENSMUSG00000035929	0.420822	2.72063	3.52696	0.0603785	0.147169	H2-Q4	17	1	35379617	35385290	non-DE
ENSMUSG00000020961	0.420805	6.11338	7.52378	0.00608897	0.0326422	Ston2	12	-1	91633009	91788387	non-DE
ENSMUSG00000015846	0.420732	7.7696	6.99248	0.00818527	0.040235	Rxra	2	1	27676440	27762957	non-DE
ENSMUSG00000013415	0.420586	6.40101	11.8104	0.000589	0.00714991	Igf2bp1	11	-1	95957163	96005940	non-DE
ENSMUSG00000051339	0.420409	6.71317	6.89091	0.00866353	0.0418442	2900026A02Rik	5	-1	113086323	113221236	non-DE
ENSMUSG00000048485	0.420345	4.51469	11.2647	0.000789933	0.00865987	Zbtb8b	4	-1	129425765	129440853	non-DE
ENSMUSG00000072082	0.420222	5.27378	17.8537	2.38549e-05	0.000890123	Ccnf	17	-1	24222198	24251484	non-DE
ENSMUSG00000026565	0.420214	2.86368	5.22737	0.0222342	0.0764309	Pou2f1	1	-1	165865154	166002678	non-DE
ENSMUSG00000021782	0.42016	7.41835	4.99868	0.0253667	0.0831756	Dlg5	14	-1	24133953	24245920	non-DE
ENSMUSG00000040552	0.420123	0.174637	5.64744	0.0174809	0.0657038	C3ar1	6	-1	122847138	122856161	non-DE
ENSMUSG00000085795	0.420073	4.02637	6.25187	0.0124062	0.0527665	Zfp703	8	1	26977325	26981461	non-DE
ENSMUSG00000042961	0.419834	2.32396	8.65329	0.00326472	0.0215266	Egflam	15	-1	7206120	7398395	non-DE
ENSMUSG00000033396	0.419796	4.57442	5.74078	0.0165754	0.0634395	Spg11	2	-1	122053520	122118386	non-DE
ENSMUSG00000045625	0.419554	1.7165	7.24229	0.00712059	0.0364325	Pigz	16	1	31933851	31946046	non-DE
ENSMUSG00000055485	0.418985	4.76153	1.716	0.190209	0.319356	Soga1	2	-1	157015799	157079254	non-DE
ENSMUSG00000027959	0.418725	0.751532	8.29302	0.00397978	0.0247502	Sass6	3	1	116594982	116631004	non-DE
ENSMUSG00000021952	0.418385	4.1455	9.75479	0.00178856	0.0147744	Xpo4	14	-1	57577521	57665430	non-DE
ENSMUSG00000036990	0.418341	7.22909	9.42964	0.00213506	0.0164815	Otud4	8	1	79639618	79677724	non-DE
ENSMUSG00000039840	0.417451	4.2317	3.3121	0.0687716	0.160275	Epg5	18	1	77938465	78035013	non-DE
ENSMUSG00000022394	0.417389	4.77291	9.96594	0.00159462	0.0136591	L3mbtl2	15	1	81663889	81688315	non-DE
ENSMUSG00000024913	0.417354	5.7986	3.63877	0.0564487	0.140843	Lrp5	19	-1	3584828	3686564	non-DE
ENSMUSG00000063146	0.417213	7.56051	7.12635	0.00759593	0.0381604	Clip2	5	-1	134489383	134552434	non-DE
ENSMUSG00000038909	0.41721	7.43121	7.62941	0.00574242	0.0315131	Kat7	11	-1	95274259	95310246	non-DE
ENSMUSG00000016942	0.417189	0.434993	3.02387	0.0820477	0.179678	Tmprss6	15	-1	78439667	78468634	non-DE
ENSMUSG00000020456	0.417103	7.43563	5.76416	0.0163563	0.0629702	Ogdh	11	1	6291633	6356642	non-DE
ENSMUSG00000020439	0.41687	6.8603	7.81997	0.00516722	0.0294656	Smtn	11	-1	3517523	3540612	non-DE
ENSMUSG00000036086	0.416825	1.60341	9.40996	0.0021581	0.016605	Zranb3	1	-1	127954184	128103047	non-DE
ENSMUSG00000095105	0.416154	1.23309	6.88452	0.00869454	0.041908	Edaradd	13	-1	12472632	12520438	non-DE
ENSMUSG00000022895	0.415983	8.19782	6.35791	0.0116859	0.0507242	Ets2	16	1	95702075	95721051	non-DE
ENSMUSG00000038331	0.415716	2.36278	3.36124	0.0667476	0.157272	Satb2	1	-1	56793981	56978650	non-DE
ENSMUSG00000038644	0.415152	3.83493	10.327	0.00131097	0.0120466	Pold1	7	-1	44532746	44548849	non-DE
ENSMUSG00000019982	0.414942	0.159288	3.63774	0.0564835	0.140905	Myb	10	-1	21124935	21160984	non-DE
ENSMUSG00000007670	0.414905	5.38459	5.21993	0.0223294	0.0766462	Khsrp	17	-1	57021051	57031522	non-DE
ENSMUSG00000028702	0.414823	1.75299	11.3238	0.00076521	0.00848753	Rad54l	4	-1	116094264	116123690	non-DE
ENSMUSG00000034573	0.41441	5.92162	6.9826	0.00823059	0.0404156	Ptpn13	5	1	103425192	103598303	non-DE
ENSMUSG00000024151	0.414302	4.3149	11.443	0.000717637	0.00814512	Msh2	17	1	87672330	87723713	non-DE
ENSMUSG00000015143	0.41425	6.62944	3.79886	0.0512876	0.131946	Actn1	12	-1	80167547	80260371	non-DE
ENSMUSG00000025236	0.413761	4.91561	13.5486	0.000232463	0.00377873	Adpgk	9	1	59291558	59324052	non-DE
ENSMUSG00000040856	0.413727	7.54406	9.24296	0.00236403	0.0175588	Dlk1	12	1	109452823	109463336	non-DE
ENSMUSG00000038604	0.413653	7.30781	10.1109	0.00147391	0.0130032	Ripor1	8	1	105605255	105622219	non-DE
ENSMUSG00000040463	0.413483	6.37202	10.1448	0.00144705	0.0128141	Mybbp1a	11	1	72441355	72451768	non-DE
ENSMUSG00000030800	0.413459	7.82294	14.583	0.000134119	0.00257356	Prss8	7	-1	127925716	127930104	non-DE
ENSMUSG00000023868	0.413396	7.02746	6.82751	0.00897645	0.0427712	Pde10a	17	1	8525372	8986648	non-DE
ENSMUSG00000029547	0.412895	4.78618	3.35529	0.0669895	0.157553	Ints1	5	-1	139751282	139775674	non-DE
ENSMUSG00000041235	0.412883	5.63748	4.1776	0.0409618	0.11383	Chd7	4	1	8690406	8867659	non-DE
ENSMUSG00000023990	0.412573	6.34284	17.1254	3.49908e-05	0.00114546	Tfeb	17	1	47737030	47792419	non-DE
ENSMUSG00000031010	0.412293	7.56219	4.40863	0.0357576	0.103979	Usp9x	X	1	13071498	13173328	non-DE
ENSMUSG00000033788	0.412062	6.82683	5.38431	0.0203186	0.0720344	Dysf	6	1	84008590	84211060	non-DE
ENSMUSG00000020196	0.411908	5.26796	4.51038	0.0336898	0.100536	Cabin1	10	-1	75646112	75764341	non-DE
ENSMUSG00000022272	0.411813	6.40643	4.18062	0.0408888	0.113694	Myo10	15	1	25622525	25813673	non-DE
ENSMUSG00000018921	0.411781	4.90565	6.32822	0.0118832	0.0513119	Pelp1	11	-1	70392883	70410031	non-DE
ENSMUSG00000022438	0.411664	5.89239	9.55667	0.00199224	0.0157574	Parvb	15	1	84232043	84315688	non-DE
ENSMUSG00000050132	0.411563	2.91467	9.58394	0.00196286	0.015611	Sarm1	11	-1	78472330	78497754	non-DE
ENSMUSG00000016520	0.411471	6.50704	8.63799	0.00329225	0.0216755	Lnx2	5	-1	147016655	147076586	non-DE
ENSMUSG00000021763	0.411467	3.35471	4.15297	0.0415617	0.114978	BC067074	13	1	113293159	113379711	non-DE
ENSMUSG00000066406	0.411216	6.19973	3.12155	0.0772632	0.172624	Akap13	7	1	75455534	75754609	non-DE
ENSMUSG00000033581	0.410982	6.61181	10.5836	0.00114098	0.0109469	Igf2bp2	16	-1	22059009	22163299	non-DE
ENSMUSG00000027217	0.410703	3.97417	7.15356	0.00748152	0.03776	Tspan18	2	-1	93201760	93334505	non-DE
ENSMUSG00000079685	0.410636	2.5447	9.17178	0.00245775	0.0178999	Ulbp1	10	-1	7440362	7473638	non-DE
ENSMUSG00000030110	0.410587	2.0014	2.82768	0.0926522	0.194722	Ret	6	-1	118151745	118197718	non-DE
ENSMUSG00000063810	0.410533	1.87142	5.24788	0.0219735	0.075848	Alms1	6	1	85587531	85702753	non-DE
ENSMUSG00000042195	0.410518	5.94536	12.6419	0.000377196	0.00524513	Slc35f2	9	1	53771538	53818154	non-DE
ENSMUSG00000024507	0.410518	7.7801	14.0684	0.000176276	0.0031068	Hsd17b4	18	1	50128201	50196269	non-DE
ENSMUSG00000056133	0.410187	-0.0176807	2.73996	0.0978673	0.201906	Unc93a2	17	-1	7362815	7385464	non-DE
ENSMUSG00000019943	0.410021	7.31094	5.73365	0.0166429	0.0635899	Atp2b1	10	1	98914406	99026143	non-DE
ENSMUSG00000045482	0.409816	6.93065	4.09282	0.0430657	0.117916	Trrap	5	1	144767732	144859778	non-DE
ENSMUSG00000024420	0.409763	0.99509	5.3213	0.0210663	0.0738139	Zfp521	18	-1	13687013	13972787	non-DE
ENSMUSG00000027074	0.409583	5.34646	15.4437	8.49986e-05	0.00197307	Slc43a3	2	1	84936579	84958509	non-DE
ENSMUSG00000000303	0.409385	7.50297	7.11033	0.00766412	0.0384075	Cdh1	8	1	106603351	106670246	non-DE
ENSMUSG00000020802	0.408971	7.00441	4.98354	0.0255896	0.0836443	Ube2o	11	-1	116537740	116581447	non-DE
ENSMUSG00000079470	0.408856	4.05118	9.97004	0.00159108	0.0136444	Utp14b	1	1	78658038	78671512	non-DE
ENSMUSG00000015176	0.408664	5.12206	6.99769	0.00816149	0.04016	Nolc1	19	1	46075863	46085530	non-DE
ENSMUSG00000001424	0.40849	7.42066	7.18761	0.00734087	0.0372629	Snd1	6	1	28475139	28935162	non-DE
ENSMUSG00000041842	0.407308	6.53954	9.1275	0.00251796	0.0181779	Fhdc1	3	-1	84442198	84480429	non-DE
ENSMUSG00000054555	0.407267	3.96949	6.70302	0.00962498	0.044687	Adam12	7	-1	133883199	134232146	non-DE
ENSMUSG00000022799	0.4072	6.79205	4.40215	0.0358936	0.104241	Arhgap31	16	-1	38598340	38713274	non-DE
ENSMUSG00000024935	0.407049	5.15597	8.42852	0.0036938	0.0235124	Slc1a1	19	1	28835049	28913960	non-DE
ENSMUSG00000015619	0.406817	5.33531	10.4012	0.00125935	0.0117339	Gata3	2	-1	9857078	9890034	non-DE
ENSMUSG00000031189	0.406816	0.395663	5.11	0.0237883	0.0799844	Aff2	X	1	69360294	69868037	non-DE
ENSMUSG00000020261	0.406809	4.24894	6.32799	0.0118847	0.0513119	Slc36a1	11	1	55204350	55236330	non-DE
ENSMUSG00000037815	0.406738	8.83134	5.03069	0.024902	0.0822238	Ctnna1	18	1	35118859	35254779	non-DE
ENSMUSG00000049532	0.406721	0.715594	7.29398	0.00691861	0.0356961	Sall2	14	-1	52311172	52328762	non-DE
ENSMUSG00000018126	0.40636	0.487323	2.72014	0.0990894	0.203601	Baiap2l2	15	-1	79258195	79285537	non-DE
ENSMUSG00000025006	0.406221	5.56082	5.80113	0.0160159	0.062054	Sorbs1	19	-1	40294753	40513779	non-DE
ENSMUSG00000024991	0.406185	7.66448	4.86023	0.0274827	0.0876348	Eif3a	19	-1	60761117	60790658	non-DE
ENSMUSG00000025060	0.406168	6.63646	6.92086	0.00851962	0.0413042	Slk	19	1	47579678	47645246	non-DE
ENSMUSG00000040481	0.406163	5.80743	3.28252	0.0700215	0.162362	Bptf	11	-1	107033081	107132127	non-DE
ENSMUSG00000042734	0.406017	0.917932	6.48037	0.0109072	0.0484758	Ttc9	12	1	81631249	81667557	non-DE
ENSMUSG00000040661	0.405522	4.52777	5.4856	0.0191738	0.0694381	Rad54l2	9	-1	106688082	106789194	non-DE
ENSMUSG00000031732	0.405374	6.33946	5.43102	0.0197821	0.0707354	Phlpp2	8	1	109868542	109944671	non-DE
ENSMUSG00000050271	0.405334	2.56303	4.1838	0.0408122	0.113593	Prag1	8	1	36094828	36147787	non-DE
ENSMUSG00000021754	0.40512	4.94167	4.72824	0.0296713	0.0926888	Map3k1	13	-1	111746428	111808993	non-DE
ENSMUSG00000029461	0.405015	6.54767	5.85758	0.0155101	0.0608977	Fam168a	7	1	100706635	100841656	non-DE
ENSMUSG00000031304	0.404868	5.01885	4.5905	0.0321496	0.0976294	Il2rg	X	-1	101264378	101268255	non-DE
ENSMUSG00000090021	0.404744	0.0411857	4.65473	0.0309682	0.0951243	Gm6493	16	-1	23014208	23017038	non-DE
ENSMUSG00000030103	0.40466	6.74543	12.3957	0.000430319	0.00575733	Bhlhe40	6	1	108660629	108666925	non-DE
ENSMUSG00000035168	0.404632	5.74434	6.45017	0.0110942	0.0489681	Tanc1	2	1	59612042	59846149	non-DE
ENSMUSG00000072825	0.404556	6.39815	4.50917	0.0337135	0.100565	Cep170b	12	1	112720455	112746592	non-DE
ENSMUSG00000102252	0.40417	5.44767	9.67895	0.00186391	0.0151752	Snrpn	7	-1	59982495	60140219	non-DE
ENSMUSG00000037432	0.403767	0.751156	4.57896	0.0323668	0.098019	Fer1l5	1	1	36372291	36422110	non-DE
ENSMUSG00000025727	0.403739	2.22477	5.88353	0.0152831	0.0604564	A930017K11Rik	17	-1	25946387	25952565	non-DE
ENSMUSG00000027654	0.403562	5.97272	11.9368	0.000550369	0.0068275	Fam83d	2	1	158768093	158786637	non-DE
ENSMUSG00000028460	0.403261	0.0117088	2.93772	0.0865329	0.185824	Sit1	4	-1	43482081	43483734	non-DE
ENSMUSG00000073678	0.403029	2.74736	8.16417	0.0042726	0.0259773	Pgap1	1	-1	54472994	54557684	non-DE
ENSMUSG00000018983	0.402923	2.03621	10.3476	0.00129645	0.0119833	E2f2	4	1	136172394	136196057	non-DE
ENSMUSG00000032902	0.402914	9.04888	12.8927	0.000329866	0.00478458	Slc16a1	3	1	104638668	104658462	non-DE
ENSMUSG00000025876	0.402793	3.83331	3.01279	0.08261	0.180378	Unc5a	13	1	54949411	55006018	non-DE
ENSMUSG00000052488	0.402726	5.15808	6.20347	0.01275	0.0536797	Cherp	8	-1	72460489	72475226	non-DE
ENSMUSG00000027678	0.402088	5.96077	5.0324	0.0248774	0.0821972	Ncoa3	2	1	165992636	166073242	non-DE
ENSMUSG00000107145	0.401928	0.869734	7.07685	0.00780863	0.0389111	Gm43442	6	1	35926711	35927124	non-DE
ENSMUSG00000033597	0.401889	7.36328	7.88332	0.00498928	0.0288111	Caskin1	17	1	24488601	24508671	non-DE
ENSMUSG00000070509	0.401882	3.79453	2.21601	0.136586	0.252826	Rgma	7	1	73375509	73419899	non-DE
ENSMUSG00000015869	0.40169	5.67679	11.8818	0.000566863	0.00697094	Prpsap1	11	-1	116470845	116494202	non-DE
ENSMUSG00000036550	0.401664	7.08148	6.00912	0.0142321	0.0575883	Cnot1	8	-1	95719451	95807464	non-DE
ENSMUSG00000068614	0.401543	0.344343	4.95925	0.0259515	0.0844858	Actc1	2	-1	114047282	114053548	non-DE
ENSMUSG00000038949	0.401383	4.67712	8.27104	0.00402825	0.0249416	Cnst	1	1	179546370	179627478	non-DE
ENSMUSG00000028452	0.400877	7.13819	5.09549	0.0239881	0.0803695	Vcp	4	-1	42979963	43000507	non-DE
ENSMUSG00000022021	0.400867	2.37182	12.4002	0.000429296	0.0057546	Diaph3	14	-1	86655367	87141235	non-DE
ENSMUSG00000033065	0.40077	3.72952	5.13801	0.0234075	0.0789856	Pfkm	15	1	98092589	98132451	non-DE
ENSMUSG00000021451	0.400671	6.55572	3.99486	0.0456392	0.122385	Sema4d	13	-1	51685529	51793747	non-DE
ENSMUSG00000062232	0.400547	5.65013	4.34105	0.0372039	0.106722	Rapgef2	3	-1	79062516	79286517	non-DE
ENSMUSG00000005609	0.399999	7.7522	7.96553	0.00476765	0.0279536	Ctr9	7	1	111028951	111056377	non-DE
ENSMUSG00000063870	0.399965	6.58942	3.51762	0.0607196	0.147771	Chd4	6	1	125095981	125130591	non-DE
ENSMUSG00000009090	0.399907	6.83433	7.37027	0.00663112	0.0346041	Ap1b1	11	1	4986824	5042791	non-DE
ENSMUSG00000029782	0.399799	5.1367	11.8677	0.000571173	0.00699353	Tmem209	6	-1	30479053	30509783	non-DE
ENSMUSG00000063445	0.399725	1.46945	5.25159	0.0219267	0.0757419	Nmral1	16	-1	4710059	4719356	non-DE
ENSMUSG00000030257	0.399403	6.30242	5.84493	0.015622	0.0610801	Srgap3	6	-1	112717971	112947266	non-DE
ENSMUSG00000044707	0.399143	4.88955	8.75963	0.00307971	0.0207101	Ccnjl	11	1	43528784	43586997	non-DE
ENSMUSG00000038279	0.399105	5.39242	10.8805	0.000971825	0.00988745	Nop2	6	1	125131909	125144753	non-DE
ENSMUSG00000033191	0.399076	5.36596	7.65189	0.00567129	0.0312783	Tie1	4	-1	118471191	118490061	non-DE
ENSMUSG00000021686	0.398849	6.38277	11.2201	0.000809174	0.0087823	Ap3b1	13	1	94358960	94566317	non-DE
ENSMUSG00000027938	0.398799	-0.00361807	4.42245	0.0354691	0.103599	Creb3l4	3	-1	90237500	90243512	non-DE
ENSMUSG00000068270	0.398693	7.02418	5.02799	0.0249408	0.0823134	Shroom4	X	1	6399854	6637448	non-DE
ENSMUSG00000047747	0.398567	0.183034	4.32469	0.0375632	0.10745	Rnf150	8	1	82863356	83091268	non-DE
ENSMUSG00000026519	0.398566	4.52857	6.49209	0.0108356	0.048304	Tmem63a	1	1	180942344	180975112	non-DE
ENSMUSG00000020493	0.397708	1.88229	6.98741	0.0082085	0.0403352	Prr11	11	-1	87089153	87108708	non-DE
ENSMUSG00000041638	0.397526	5.41118	3.26906	0.0705979	0.163203	Gcn1l1	5	1	115565254	115622654	non-DE
ENSMUSG00000034157	0.397442	4.72897	13.3045	0.000264776	0.00413754	Cipc	12	1	86947043	86965362	non-DE
ENSMUSG00000028962	0.397277	7.45065	6.8851	0.00869172	0.041908	Slc4a2	5	1	24423837	24440950	non-DE
ENSMUSG00000027353	0.397152	2.24534	12.6196	0.00038173	0.00526676	Mcm8	2	1	132816141	132844197	non-DE
ENSMUSG00000041763	0.396918	6.72647	9.98729	0.00157625	0.0136005	Tpp2	1	1	43933647	44003000	non-DE
ENSMUSG00000001555	0.396679	3.66362	6.73402	0.0094591	0.044223	Fkbp10	11	1	100415697	100424824	non-DE
ENSMUSG00000031691	0.396466	6.45169	9.73708	0.00180587	0.0148576	Tnpo2	8	1	85036915	85057583	non-DE
ENSMUSG00000038963	0.396418	7.5609	6.3574	0.0116893	0.0507242	Slco4a1	2	1	180456245	180474867	non-DE
ENSMUSG00000029122	0.395889	-0.0606341	4.47835	0.0343268	0.101643	Evc	5	-1	37289098	37336894	non-DE
ENSMUSG00000059326	0.395635	4.07702	7.08444	0.00777561	0.0388286	Csf2ra	19	-1	61223957	61228429	non-DE
ENSMUSG00000056758	0.395612	-0.120327	5.20058	0.0225793	0.0771296	Hmga2	10	-1	120361275	120476469	non-DE
ENSMUSG00000024140	0.395518	8.74427	4.08564	0.043249	0.118257	Epas1	17	1	86753700	86833410	non-DE
ENSMUSG00000068196	0.395436	0.638622	2.9272	0.0870983	0.186769	Col8a1	16	-1	57624258	57754737	non-DE
ENSMUSG00000033763	0.395281	5.4231	6.82231	0.00900259	0.0427948	Mtss1l	8	1	110721476	110741400	non-DE
ENSMUSG00000063972	0.395217	5.14824	13.0978	0.00029565	0.0044622	Nr6a1	2	-1	38723370	38927688	non-DE
ENSMUSG00000040761	0.395172	6.45227	3.27324	0.0704185	0.162962	Spen	4	-1	141467890	141538597	non-DE
ENSMUSG00000036833	0.395172	3.35479	9.09697	0.00256033	0.0183147	Pnpla7	2	1	24976033	25054057	non-DE
ENSMUSG00000020674	0.395056	5.6679	7.45137	0.00633883	0.0335619	Pxdn	12	1	29937608	30017658	non-DE
ENSMUSG00000044864	0.395043	5.76259	6.07636	0.0137003	0.0562406	Ankrd50	3	-1	38449259	38484844	non-DE
ENSMUSG00000004113	0.394941	3.17389	2.95072	0.0858391	0.18491	Cacna1b	2	-1	24603887	24763152	non-DE
ENSMUSG00000027339	0.394925	2.18848	9.21192	0.00240444	0.0176886	Rassf2	2	-1	131989415	132030258	non-DE
ENSMUSG00000071037	0.39469	1.77818	10.0676	0.00150899	0.013243	Camkmt	17	1	85090552	85458588	non-DE
ENSMUSG00000083902	0.394239	0.117536	2.85099	0.0913174	0.192777	Gm15975	5	1	55624190	55625591	non-DE
ENSMUSG00000037991	0.39417	0.111321	4.09817	0.0429297	0.117635	Rmi2	16	1	10835059	10892966	non-DE
ENSMUSG00000048163	0.393834	0.267001	4.02388	0.0448603	0.121117	Selplg	5	-1	113818536	113832644	non-DE
ENSMUSG00000067586	0.393798	2.27975	6.32773	0.0118864	0.0513119	S1pr3	13	1	51408639	51422797	non-DE
ENSMUSG00000036395	0.393736	0.491913	5.80906	0.0159438	0.0618425	Glb1l2	9	-1	26763044	26806468	non-DE
ENSMUSG00000051220	0.393526	2.25849	10.7816	0.00102513	0.0102528	Ercc6l	X	-1	102141716	102157091	non-DE
ENSMUSG00000000028	0.393517	2.89493	13.1671	0.000284905	0.00434174	Cdc45	16	-1	18780447	18811987	non-DE
ENSMUSG00000001151	0.393407	3.72038	3.6118	0.0573708	0.14244	Pcnt	10	-1	76351263	76442786	non-DE
ENSMUSG00000034522	0.393407	5.8603	6.2372	0.0125094	0.0531081	Zfp395	14	1	65358389	65398930	non-DE
ENSMUSG00000091387	0.39301	3.68749	4.08094	0.0433696	0.118447	Gcnt4	13	1	96924689	96950906	non-DE
ENSMUSG00000030494	0.392984	5.9791	14.8699	0.000115185	0.00233401	Rhpn2	7	1	35334170	35392289	non-DE
ENSMUSG00000026447	0.392906	3.88671	8.22215	0.00413822	0.0254115	Pik3c2b	1	1	133045667	133108687	non-DE
ENSMUSG00000068040	0.392784	6.48355	5.60702	0.0178886	0.0665915	Tm9sf4	2	1	153161303	153210466	non-DE
ENSMUSG00000034101	0.392499	5.43647	6.40448	0.0113833	0.0498244	Ctnnd1	2	-1	84600071	84650765	non-DE
ENSMUSG00000030249	0.392477	0.734356	3.30677	0.0689949	0.160559	Abcc9	6	-1	142587862	142702315	non-DE
ENSMUSG00000033863	0.392363	5.13094	7.0485	0.00793315	0.0393789	Klf9	19	1	23141226	23168134	non-DE
ENSMUSG00000037210	0.391889	5.29303	4.08033	0.0433852	0.118447	Fam193a	5	1	34369933	34486456	non-DE
ENSMUSG00000034430	0.391823	6.68386	9.83151	0.00171548	0.0143807	Zxdc	6	1	90369492	90403490	non-DE
ENSMUSG00000024120	0.391821	4.82475	7.41554	0.00646629	0.0340872	Lrpprc	17	-1	84705247	84790789	non-DE
ENSMUSG00000024483	0.391416	5.25027	5.49909	0.0190264	0.0691856	Ankhd1	18	1	36559987	36658913	non-DE
ENSMUSG00000037692	0.391285	5.89147	3.19359	0.0739277	0.167842	Ahdc1	4	1	133011260	133078110	non-DE
ENSMUSG00000021338	0.391261	6.30776	8.936	0.00279605	0.0195171	Carmil1	13	-1	24012344	24280795	non-DE
ENSMUSG00000035493	0.391213	3.86131	7.40886	0.00649035	0.0341239	Tgfbi	13	1	56609523	56639562	non-DE
ENSMUSG00000031540	0.391121	5.30758	3.3379	0.0677011	0.158672	Kat6a	8	1	22859535	22943259	non-DE
ENSMUSG00000034032	0.390982	4.35193	6.03113	0.0140558	0.057169	Rpap1	2	-1	119763304	119787537	non-DE
ENSMUSG00000028584	0.390965	1.0317	3.47771	0.0622009	0.150008	Lrrc38	4	1	143349757	143371032	non-DE
ENSMUSG00000051149	0.390951	1.00891	3.32337	0.0683016	0.159604	Adnp	2	-1	168180986	168207112	non-DE
ENSMUSG00000020810	0.390847	1.82809	8.55795	0.00344016	0.0223169	Cygb	11	-1	116645595	116654313	non-DE
ENSMUSG00000063808	0.390687	4.33325	8.5354	0.00348304	0.0225139	Gpatch1	7	-1	35276536	35318440	non-DE
ENSMUSG00000041870	0.390501	8.19966	11.0172	0.000902725	0.00939392	Ankrd13a	5	1	114774677	114806200	non-DE
ENSMUSG00000096980	0.390379	3.10323	7.33018	0.00678061	0.0351637	Gm26526	7	-1	39588518	39591679	non-DE
ENSMUSG00000033216	0.38992	3.73692	10.0408	0.0015311	0.0133841	Eefsec	6	-1	88257334	88446539	non-DE
ENSMUSG00000027646	0.389898	7.07184	4.6261	0.031489	0.0962849	Src	2	1	157418444	157471862	non-DE
ENSMUSG00000079487	0.389846	4.6644	5.11644	0.0237002	0.0797686	Med12	X	1	101274030	101297465	non-DE
ENSMUSG00000053293	0.389802	5.16	4.06214	0.0438549	0.119406	Pom121	5	-1	135376141	135394546	non-DE
ENSMUSG00000081111	0.389797	0.537578	6.94394	0.00841036	0.0410136	Gm5913	8	-1	97427712	97429110	non-DE
ENSMUSG00000021257	0.389736	2.12385	6.30821	0.012018	0.0517065	Angel1	12	-1	86700502	86726460	non-DE
ENSMUSG00000025224	0.38971	5.62296	2.96124	0.0852825	0.184324	Gbf1	19	1	46152509	46286510	non-DE
ENSMUSG00000040097	0.389702	4.10473	5.8888	0.0152375	0.060344	Flywch1	17	-1	23752793	23771602	non-DE
ENSMUSG00000073411	0.389526	7.8692	3.01114	0.0826943	0.180473	H2-D1	17	1	35262730	35267499	non-DE
ENSMUSG00000045010	0.389504	-0.0872051	2.23261	0.135125	0.250968	Gm4779	X	-1	101790053	101794423	non-DE
ENSMUSG00000029191	0.389503	4.95663	6.43914	0.0111632	0.0492115	Rfc1	5	-1	65261850	65335670	non-DE
ENSMUSG00000037851	0.389256	5.97432	7.12638	0.00759578	0.0381604	Iars	13	1	49682100	49734267	non-DE
ENSMUSG00000001525	0.389128	8.32308	11.7556	0.000606596	0.00730084	Tubb5	17	-1	35833921	35838306	non-DE
ENSMUSG00000036864	0.389114	1.17397	7.64208	0.00570222	0.0313777	Proser3	7	-1	30539134	30552299	non-DE
ENSMUSG00000023066	0.388992	1.91662	5.90939	0.0150604	0.0599111	Rttn	18	1	88971790	89131016	non-DE
ENSMUSG00000022614	0.38884	5.12743	4.4757	0.0343801	0.101753	Lmf2	15	-1	89351004	89355659	non-DE
ENSMUSG00000001435	0.388834	4.85016	4.26107	0.0389954	0.110161	Col18a1	10	-1	77052178	77166548	non-DE
ENSMUSG00000039671	0.388761	5.45066	5.0392	0.0247799	0.0820696	Zmynd8	2	-1	165784152	165899016	non-DE
ENSMUSG00000020143	0.388745	-0.0147033	2.998	0.0833675	0.181522	Dock2	11	-1	34226815	34783892	non-DE
ENSMUSG00000020689	0.388676	7.62723	3.26894	0.0706034	0.163203	Itgb3	11	1	104608000	104670476	non-DE
ENSMUSG00000024251	0.388415	2.99991	5.11378	0.0237365	0.0798672	Thada	17	-1	84190076	84466205	non-DE
ENSMUSG00000038855	0.388327	6.66628	12.1185	0.00049923	0.00637769	Itpkb	1	1	180330485	180424802	non-DE
ENSMUSG00000034329	0.388302	1.83874	8.80632	0.00300189	0.0204002	Brip1	11	-1	86058138	86201193	non-DE
ENSMUSG00000044562	0.388086	3.44732	5.57988	0.0181679	0.0672732	Rasip1	7	1	45627488	45639093	non-DE
ENSMUSG00000038034	0.388041	6.00999	3.35901	0.0668381	0.157406	Igsf8	1	1	172261641	172319841	non-DE
ENSMUSG00000038902	0.387922	4.22707	5.60622	0.0178969	0.0666046	Pogz	3	1	94837567	94882326	non-DE
ENSMUSG00000023034	0.387751	2.57667	5.56619	0.0183106	0.0676009	Nr4a1	15	1	101254269	101274795	non-DE
ENSMUSG00000052707	0.387623	6.39786	4.92334	0.0264963	0.0856922	Tnrc6a	7	1	123123885	123195296	non-DE
ENSMUSG00000054509	0.387368	6.20457	5.81429	0.0158965	0.0617266	Parp4	14	1	56575619	56659794	non-DE
ENSMUSG00000031161	0.387333	5.28834	7.01711	0.00807344	0.0398376	Hdac6	X	-1	7930120	7947889	non-DE
ENSMUSG00000091971	0.387307	1.03676	1.77527	0.182731	0.310637	Hspa1a	17	-1	34969190	34972156	non-DE
ENSMUSG00000024791	0.387267	2.148	5.41623	0.0199504	0.0710327	Cdca5	19	1	6084983	6091777	non-DE
ENSMUSG00000024073	0.386991	5.95256	5.05659	0.0245324	0.0815518	Birc6	17	1	74528295	74703356	non-DE
ENSMUSG00000055204	0.386981	7.67995	3.46216	0.0627884	0.151084	Ankrd17	5	-1	90227166	90366577	non-DE
ENSMUSG00000024043	0.386777	5.73935	12.4409	0.000420033	0.00566264	Arhgap28	17	-1	67842713	68004120	non-DE
ENSMUSG00000054404	0.386616	3.00912	4.19247	0.0406038	0.113191	Slfn5	11	1	82951349	82964840	non-DE
ENSMUSG00000024085	0.386593	7.34101	3.55591	0.0593336	0.145683	Man2a1	17	1	64600736	64755110	non-DE
ENSMUSG00000039630	0.386387	8.00937	8.20965	0.00416681	0.0255316	Hnrnpu	1	-1	178321108	178337797	non-DE
ENSMUSG00000002319	0.386301	6.32481	9.39059	0.00218102	0.0167145	Ipo4	14	-1	55625400	55635957	non-DE
ENSMUSG00000025019	0.386227	4.54086	4.89325	0.0269619	0.086481	Lcor	19	1	41482637	41562261	non-DE
ENSMUSG00000048490	0.386143	6.10824	7.59278	0.00586024	0.0319454	Nrip1	16	-1	76287400	76373827	non-DE
ENSMUSG00000037979	0.386121	3.63019	9.34014	0.00224189	0.0169494	Ccdc92	5	-1	124834418	124862424	non-DE
ENSMUSG00000028991	0.385916	5.80089	6.89501	0.00864365	0.0417909	Mtor	4	1	148448611	148557683	non-DE
ENSMUSG00000009418	0.385889	5.52433	2.60658	0.106421	0.213265	Nav1	1	-1	135434580	135607295	non-DE
ENSMUSG00000034297	0.385844	6.53489	6.82279	0.00900021	0.0427948	Med13	11	-1	86267033	86357602	non-DE
ENSMUSG00000059456	0.385766	3.30813	2.287	0.130462	0.245051	Ptk2b	14	-1	66153257	66281052	non-DE
ENSMUSG00000078202	0.385649	1.64483	5.52234	0.0187752	0.0687688	Nrarp	2	1	25180758	25183339	non-DE
ENSMUSG00000030447	0.385626	6.24388	8.06875	0.00450352	0.0269525	Cyfip1	7	1	55841745	55932602	non-DE
ENSMUSG00000023845	0.385504	6.41095	6.55587	0.0104539	0.0472628	Lnpep	17	-1	17521410	17625050	non-DE
ENSMUSG00000032216	0.385417	8.65627	6.49511	0.0108172	0.0482619	Nedd4	9	1	72662346	72749852	non-DE
ENSMUSG00000057738	0.385395	7.35268	3.75548	0.0526346	0.134269	Sptan1	2	1	29965560	30031451	non-DE
ENSMUSG00000061410	0.385111	6.08378	4.54279	0.0330577	0.0993014	Zcchc14	8	-1	121598703	121652901	non-DE
ENSMUSG00000036565	0.385022	5.64052	5.74903	0.0164977	0.0632705	Ttyh3	5	-1	140620578	140649031	non-DE
ENSMUSG00000024949	0.385011	6.71446	7.18885	0.00733581	0.037259	Sf1	19	1	6363690	6378030	non-DE
ENSMUSG00000058396	0.384996	2.60532	7.99153	0.00469966	0.0276352	Gpr182	10	-1	127747276	127751732	non-DE
ENSMUSG00000059495	0.384734	6.84223	5.06703	0.0243852	0.0812763	Arhgef12	9	-1	42963842	43107239	non-DE
ENSMUSG00000032479	0.384716	7.07099	5.60914	0.017867	0.0665637	Map4	9	1	109931460	110083955	non-DE
ENSMUSG00000029163	0.384608	7.35446	2.68061	0.101577	0.206691	Emilin1	5	1	30913402	30921277	non-DE
ENSMUSG00000027035	0.384501	5.84416	6.01629	0.0141744	0.0574369	Cers6	2	1	68861441	69114282	non-DE
ENSMUSG00000021279	0.384486	7.05251	3.13611	0.0765764	0.171732	Cdc42bpb	12	-1	111292976	111377718	non-DE
ENSMUSG00000058301	0.38444	5.49249	4.30558	0.0379876	0.108289	Upf1	8	-1	70331525	70353278	non-DE
ENSMUSG00000028164	0.384343	5.88335	8.83037	0.00296258	0.0201718	Manba	3	1	135485611	135571404	non-DE
ENSMUSG00000034205	0.384273	4.35507	4.15502	0.0415113	0.114928	Loxl2	14	1	69609068	69695834	non-DE
ENSMUSG00000028459	0.384252	-0.0398119	3.39761	0.0652908	0.155099	Cd72	4	-1	43446462	43454628	non-DE
ENSMUSG00000029478	0.384176	6.42251	2.50493	0.113491	0.222853	Ncor2	5	-1	125017153	125179219	non-DE
ENSMUSG00000020100	0.384099	4.41496	3.63055	0.056728	0.141315	Slc29a3	10	-1	60712072	60752794	non-DE
ENSMUSG00000020422	0.383189	7.40602	4.93506	0.0263172	0.0853227	Tns3	11	-1	8431652	8664535	non-DE
ENSMUSG00000005312	0.383188	7.64061	11.0873	0.000869195	0.00914595	Ubqln1	13	-1	58176156	58215653	non-DE
ENSMUSG00000023118	0.382884	6.13554	4.88577	0.027079	0.0867582	Sympk	7	1	19024377	19054618	non-DE
ENSMUSG00000032122	0.382881	1.10605	5.70811	0.0168867	0.0641966	Slc37a2	9	-1	37227585	37255738	non-DE
ENSMUSG00000055296	0.382817	5.56517	5.35185	0.0207003	0.0729489	Tmem245	4	-1	56866923	56947437	non-DE
ENSMUSG00000032135	0.382774	5.70621	12.7706	0.000352106	0.00499835	Mcam	9	1	44134469	44142727	non-DE
ENSMUSG00000027221	0.382717	1.97192	6.19721	0.0127952	0.0537901	Chst1	2	1	92599707	92615250	non-DE
ENSMUSG00000026425	0.382471	5.14297	5.77095	0.0162932	0.0627902	Srgap2	1	-1	131285251	131527352	non-DE
ENSMUSG00000047181	0.382462	1.79482	6.08643	0.0136224	0.0561001	Samd14	11	1	95009879	95026087	non-DE
ENSMUSG00000006676	0.382412	6.61026	5.84035	0.0156627	0.0610949	Usp19	9	1	108490602	108502337	non-DE
ENSMUSG00000021294	0.38226	5.32313	5.31696	0.0211189	0.0739355	Kif26a	12	1	112146208	112181747	non-DE
ENSMUSG00000033228	0.382249	7.28373	6.63304	0.0100104	0.0459037	Scaf11	15	-1	96411699	96460843	non-DE
ENSMUSG00000032555	0.382174	5.43406	21.7825	3.05378e-06	0.000214858	Topbp1	9	1	103305215	103350428	non-DE
ENSMUSG00000061589	0.382127	5.99797	4.42625	0.0353901	0.103492	Dot1l	10	1	80755206	80795461	non-DE
ENSMUSG00000049939	0.382086	0.810735	3.88965	0.0485846	0.127455	Lrrc4	6	-1	28661831	28831747	non-DE
ENSMUSG00000034685	0.382063	2.00387	3.35204	0.0671218	0.157759	Fam171a2	11	-1	102436981	102447682	non-DE
ENSMUSG00000030138	0.382013	4.93714	5.43318	0.0197577	0.0706659	Bms1	6	-1	118383381	118419474	non-DE
ENSMUSG00000039542	0.381963	5.10854	1.21977	0.269405	0.407392	Ncam1	9	-1	49502136	49798925	non-DE
ENSMUSG00000032834	0.381874	4.39931	10.4132	0.00125118	0.0116974	Pwp2	10	-1	78170909	78185149	non-DE
ENSMUSG00000040054	0.381786	7.16732	4.04723	0.0442439	0.120075	Baz2a	10	1	128091577	128129303	non-DE
ENSMUSG00000038384	0.381682	5.10853	2.3927	0.121903	0.23381	Setd1b	5	1	123142193	123168629	non-DE
ENSMUSG00000062960	0.381617	5.28701	5.30913	0.0212139	0.0741492	Kdr	5	-1	75932827	75978458	non-DE
ENSMUSG00000032849	0.381494	2.5838	7.75339	0.00536119	0.0302184	Abcc4	14	-1	118482692	118706219	non-DE
ENSMUSG00000022218	0.381458	6.82755	8.07541	0.00448699	0.0268763	Tgm1	14	-1	55700009	55713926	non-DE
ENSMUSG00000026077	0.381447	2.17906	3.2889	0.0697496	0.161912	Npas2	1	1	39193731	39363236	non-DE
ENSMUSG00000032531	0.381414	7.20438	4.38484	0.03626	0.104972	Amotl2	9	1	102716672	102733418	non-DE
ENSMUSG00000040537	0.381012	0.921082	6.15455	0.0131074	0.0546478	Adam22	5	-1	8072352	8368160	non-DE
ENSMUSG00000027395	0.38087	3.44344	7.55245	0.00599284	0.032323	Polr1b	2	1	129100995	129126594	non-DE
ENSMUSG00000022098	0.380731	6.33797	5.03635	0.0248208	0.0821217	Bmp1	14	-1	70474558	70520234	non-DE
ENSMUSG00000000631	0.380652	7.13302	4.77574	0.0288634	0.0907759	Myo18a	11	1	77763246	77865980	non-DE
ENSMUSG00000069892	0.380633	0.371005	4.27242	0.0387358	0.109649	9930111J21Rik2	11	-1	49015874	49051242	non-DE
ENSMUSG00000025764	0.380605	7.97006	11.3121	0.000770021	0.00850089	Jade1	3	1	41555731	41616864	non-DE
ENSMUSG00000031827	0.380521	5.86849	13.5402	0.000233505	0.00378257	Cotl1	8	-1	119809222	119840544	non-DE
ENSMUSG00000024521	0.380492	2.66836	4.36954	0.0365869	0.105616	Pmaip1	18	1	66458533	66465565	non-DE
ENSMUSG00000001082	0.380386	4.99662	7.84671	0.00509132	0.0291977	Mfsd10	5	-1	34633642	34637212	non-DE
ENSMUSG00000046572	0.380161	3.81206	5.9839	0.0144371	0.0581346	Zfp518b	5	-1	38668484	38684826	non-DE
ENSMUSG00000069083	0.380002	0.971063	6.75476	0.00934978	0.0438357	Gm10259	3	-1	25211016	25212605	non-DE
ENSMUSG00000026193	0.379986	11.3437	1.5829	0.208343	0.340347	Fn1	1	-1	71585520	71653200	non-DE
ENSMUSG00000028214	0.379754	1.26374	4.10531	0.0427489	0.117344	Gem	4	1	11704457	11714752	non-DE
ENSMUSG00000042446	0.379656	5.3859	8.84101	0.00294536	0.0201029	Zmym4	4	-1	126861939	126968135	non-DE
ENSMUSG00000112252	0.379508	0.358317	3.73016	0.0534382	0.135604	Gm32802	10	1	118258688	118261096	non-DE
ENSMUSG00000048612	0.37946	7.3145	3.35317	0.0670755	0.157727	Myof	19	-1	37899036	38043577	non-DE
ENSMUSG00000041406	0.378861	3.10124	10.2563	0.00136218	0.0123884	BC055324	1	-1	163945993	163994796	non-DE
ENSMUSG00000028580	0.37877	6.16132	6.10981	0.0134433	0.0555882	Pum1	4	1	130663321	130781564	non-DE
ENSMUSG00000086040	0.378553	3.66179	6.79582	0.00913714	0.0431877	Wipf3	6	1	54429603	54503768	non-DE
ENSMUSG00000079020	0.378542	8.09401	8.92758	0.00280896	0.0195493	Slc45a4	15	-1	73577424	73645762	non-DE
ENSMUSG00000018377	0.378392	5.53725	13.369	0.000255815	0.00405122	Vezf1	11	1	88068279	88084729	non-DE
ENSMUSG00000020453	0.378368	4.07083	8.96887	0.00274618	0.0192546	Patz1	11	1	3288874	3309083	non-DE
ENSMUSG00000031642	0.378287	2.7062	4.74574	0.0293708	0.0920165	Sh3rf1	8	1	61223872	61396071	non-DE
ENSMUSG00000002297	0.378058	4.85114	14.9507	0.000110356	0.00227781	Dbf4	5	-1	8396973	8422716	non-DE
ENSMUSG00000075591	0.377983	3.35958	10.1875	0.00141397	0.0126784	Gm10874	5	1	138363719	138388287	non-DE
ENSMUSG00000023169	0.377918	9.06392	4.84457	0.0277334	0.088136	Slc38a1	15	-1	96571418	96642913	non-DE
ENSMUSG00000071650	0.377906	7.67482	6.83777	0.00892503	0.042598	Ganab	19	1	8898071	8916672	non-DE
ENSMUSG00000041879	0.377889	5.79117	7.76658	0.00532218	0.0301186	Ipo9	1	-1	135382312	135430499	non-DE
ENSMUSG00000051675	0.377775	3.90119	5.52218	0.0187768	0.0687688	Trim32	4	1	65604986	65616238	non-DE
ENSMUSG00000033792	0.377768	4.75622	7.18424	0.00735468	0.0373197	Atp7a	X	1	106027276	106124926	non-DE
ENSMUSG00000106239	0.377649	1.5253	3.25929	0.0710199	0.163737	Gm9260	12	-1	115982263	115993370	non-DE
ENSMUSG00000044393	0.377477	7.20298	3.3188	0.0684916	0.159863	Dsg2	18	1	20558074	20604521	non-DE
ENSMUSG00000019647	0.377473	5.08269	2.50617	0.113401	0.222764	Sema6a	18	-1	47235598	47368870	non-DE
ENSMUSG00000020325	0.377176	6.50641	9.70954	0.00183314	0.0149938	Fstl3	10	1	79777272	79782630	non-DE
ENSMUSG00000049807	0.37712	6.36315	3.75253	0.0527276	0.134477	Arhgap23	11	1	97415533	97502402	non-DE
ENSMUSG00000004565	0.376932	5.94051	10.5476	0.00116337	0.0111165	Pnpla6	8	1	3515384	3544267	non-DE
ENSMUSG00000034255	0.376918	4.79752	6.44236	0.0111431	0.0491533	Arhgap27	11	-1	103331497	103363692	non-DE
ENSMUSG00000018974	0.376772	4.24975	5.5959	0.0180026	0.0668572	Sart3	5	-1	113742446	113772510	non-DE
ENSMUSG00000022508	0.376528	4.63376	10.4711	0.00121255	0.0114395	Bcl6	16	-1	23965052	23988852	non-DE
ENSMUSG00000020706	0.376298	5.16997	7.94969	0.00480955	0.0281061	Ftsj3	11	-1	106249142	106256079	non-DE
ENSMUSG00000026219	0.376238	8.85725	6.25251	0.0124017	0.0527634	Trip12	1	-1	84721189	84840516	non-DE
ENSMUSG00000044791	0.376176	6.18533	4.42368	0.0354435	0.103584	Setd2	9	1	110532597	110618633	non-DE
ENSMUSG00000037552	0.376141	6.4913	3.76706	0.0522713	0.133771	Plekhg2	7	-1	28359604	28372599	non-DE
ENSMUSG00000023345	0.375989	2.18696	9.72338	0.00181939	0.0149245	Poc1a	9	1	106281061	106350521	non-DE
ENSMUSG00000029550	0.375971	6.59678	7.8006	0.0052229	0.0296636	Sppl3	5	1	115011137	115098790	non-DE
ENSMUSG00000074486	0.375277	0.118685	1.56875	0.210389	0.342877	Bglap2	3	-1	88377736	88378699	non-DE
ENSMUSG00000047003	0.37504	3.10759	7.79061	0.00525184	0.0297833	Zfp41	15	1	75616679	75629827	non-DE
ENSMUSG00000060969	0.374941	0.233265	5.01095	0.0251875	0.0828375	Irx1	13	-1	71957921	71963723	non-DE
ENSMUSG00000024036	0.374832	4.74601	6.17787	0.0129358	0.0541373	Slc37a1	17	1	31286792	31350739	non-DE
ENSMUSG00000001150	0.374717	4.88321	6.55055	0.0104852	0.0473288	Mcm3ap	10	1	76468927	76515857	non-DE
ENSMUSG00000059334	0.374272	8.10427	6.19933	0.0127799	0.0537599	Zfp36l3	X	-1	53774048	53776394	non-DE
ENSMUSG00000042390	0.374263	5.37559	5.69002	0.0170617	0.0646706	Gatad2b	3	1	90293178	90363407	non-DE
ENSMUSG00000022945	0.374236	2.47474	9.90712	0.0016464	0.0139756	Chaf1b	16	1	93883901	93906115	non-DE
ENSMUSG00000041417	0.374126	5.67111	6.21862	0.0126414	0.0533496	Pik3r1	13	-1	101680563	101768217	non-DE
ENSMUSG00000070939	0.374032	5.31699	6.9495	0.00838429	0.0410136	Tgfbrap1	1	-1	43047200	43098637	non-DE
ENSMUSG00000019984	0.373999	4.64173	6.45377	0.0110717	0.0488994	Med23	10	1	24869986	24913681	non-DE
ENSMUSG00000001419	0.373918	6.90738	5.11634	0.0237016	0.0797686	Mef2d	3	1	88142372	88172086	non-DE
ENSMUSG00000034998	0.373878	4.91075	11.9319	0.000551809	0.00683074	Foxn2	17	1	88440711	88490533	non-DE
ENSMUSG00000026180	0.373751	5.49661	8.1068	0.00440996	0.0265612	Cxcr2	1	1	74153989	74161246	non-DE
ENSMUSG00000045624	0.373611	4.99131	7.8705	0.00502478	0.0289452	Esf1	2	-1	140119883	140170564	non-DE
ENSMUSG00000027111	0.373567	6.28725	7.34464	0.00672632	0.0349848	Itga6	2	1	71745616	71858416	non-DE
ENSMUSG00000083327	0.373564	6.4737	4.51909	0.0335186	0.100152	Vcp-rs	X	-1	104345829	104348234	non-DE
ENSMUSG00000030530	0.373556	7.48332	4.02075	0.0449437	0.121227	Furin	7	-1	80388585	80405436	non-DE
ENSMUSG00000068036	0.373551	6.62234	5.55184	0.0184612	0.068006	Afdn	17	1	13760539	13906150	non-DE
ENSMUSG00000006456	0.373443	4.35907	7.98873	0.00470694	0.0276665	Rbm14	19	-1	4800569	4811634	non-DE
ENSMUSG00000037820	0.373256	9.01804	5.25066	0.0219384	0.075764	Tgm2	2	-1	158116402	158146436	non-DE
ENSMUSG00000032177	0.373028	2.85202	4.56547	0.0326227	0.0984958	Pde4a	9	1	21165714	21213248	non-DE
ENSMUSG00000020721	0.372812	7.17866	4.03157	0.0446563	0.120774	Helz	11	1	107547930	107693826	non-DE
ENSMUSG00000020592	0.372733	8.46933	14.1901	0.000165237	0.00296675	Sdc1	12	1	8771323	8793715	non-DE
ENSMUSG00000027276	0.372704	3.71048	9.86012	0.001689	0.0142263	Jag1	2	-1	137081456	137116644	non-DE
ENSMUSG00000039220	0.372682	5.05436	5.45163	0.0195501	0.070242	Ppp1r10	17	1	35916434	35932283	non-DE
ENSMUSG00000028080	0.372625	4.64783	6.40941	0.0113517	0.0497168	Lrba	3	1	86224680	86782692	non-DE
ENSMUSG00000001403	0.372367	3.49958	10.7139	0.00106331	0.0105156	Ube2c	2	1	164769898	164778822	non-DE
ENSMUSG00000025017	0.372242	2.98878	3.73921	0.0531496	0.135022	Pik3ap1	19	-1	41272377	41385102	non-DE
ENSMUSG00000046079	0.372085	5.07313	4.34288	0.037164	0.10665	Lrrc8d	5	1	105699969	105832436	non-DE
ENSMUSG00000030539	0.371912	5.5981	3.55966	0.0592	0.145475	Sema4b	7	1	80186841	80226527	non-DE
ENSMUSG00000018209	0.371898	6.80674	12.3126	0.000449915	0.00591328	Stk4	2	1	164070322	164155524	non-DE
ENSMUSG00000038534	0.371792	2.0657	3.20731	0.0733098	0.166839	Osbpl7	11	1	97050628	97068904	non-DE
ENSMUSG00000030852	0.371757	7.1963	5.4816	0.0192177	0.0695436	Tacc2	7	1	130577438	130764785	non-DE
ENSMUSG00000070639	0.371625	4.92434	3.92577	0.0475515	0.12565	Lrrc8b	5	1	105415775	105490074	non-DE
ENSMUSG00000020723	0.371468	1.14348	1.71576	0.19024	0.319357	Cacng4	11	-1	107732357	107794557	non-DE
ENSMUSG00000027778	0.371418	2.6158	9.48607	0.00207038	0.0161112	Ift80	3	-1	68892499	69004570	non-DE
ENSMUSG00000052539	0.371417	6.05815	7.71854	0.00546565	0.0305742	Magi3	3	-1	104013259	104220374	non-DE
ENSMUSG00000074796	0.371345	2.4568	5.86144	0.0154761	0.0608391	Slc4a11	2	-1	130684113	130697519	non-DE
ENSMUSG00000023940	0.371106	2.42978	5.52954	0.018698	0.0686308	Sgo1	17	-1	53674786	53689333	non-DE
ENSMUSG00000089809	0.370793	4.96858	9.34447	0.0022366	0.0169325	Rasgef1b	5	-1	99217426	99729065	non-DE
ENSMUSG00000032777	0.37075	4.96569	3.43615	0.0637841	0.152654	Gtf3c1	7	-1	125640954	125707780	non-DE
ENSMUSG00000066571	0.370737	6.12866	5.7149	0.0168215	0.064082	4931406P16Rik	7	-1	34236707	34313551	non-DE
ENSMUSG00000022912	0.370352	6.56381	4.62764	0.0314609	0.0962196	Pros1	16	1	62854307	62929346	non-DE
ENSMUSG00000005886	0.3703	6.38658	3.86391	0.0493351	0.128631	Ncoa2	1	-1	13139105	13374083	non-DE
ENSMUSG00000027889	0.370199	5.0178	4.35726	0.0368516	0.106034	Ampd2	3	-1	108074062	108086651	non-DE
ENSMUSG00000030096	0.370193	7.4595	4.482	0.0342536	0.101576	Slc6a6	6	1	91684053	91759066	non-DE
ENSMUSG00000028820	0.369878	6.68794	6.46465	0.0110041	0.0487227	Sfpq	4	1	127021324	127037013	non-DE
ENSMUSG00000031311	0.369726	7.13048	9.5233	0.00202879	0.015913	Nono	X	1	101429318	101448591	non-DE
ENSMUSG00000032218	0.369714	3.23526	6.07402	0.0137184	0.0562543	Ccnb2	9	-1	70407692	70421547	non-DE
ENSMUSG00000021374	0.369514	6.51063	7.99213	0.0046981	0.0276352	Nup153	13	-1	46679905	46727940	non-DE
ENSMUSG00000006800	0.369493	6.49732	1.72641	0.188871	0.317826	Sulf2	2	-1	166073089	166155663	non-DE
ENSMUSG00000038366	0.369466	8.82552	5.05563	0.0245461	0.0815627	Lasp1	11	1	97799000	97838764	non-DE
ENSMUSG00000029426	0.369346	6.88695	13.1108	0.000293603	0.00445508	Scarb2	5	-1	92441314	92506833	non-DE
ENSMUSG00000029651	0.369228	1.69821	0.992621	0.319103	0.457264	Mtus2	5	1	147957320	148316065	non-DE
ENSMUSG00000001440	0.369213	7.42201	5.55141	0.0184658	0.068006	Kpnb1	11	-1	97159714	97187881	non-DE
ENSMUSG00000031865	0.368833	6.38924	4.54057	0.0331005	0.0993648	Dctn1	6	1	83165920	83200117	non-DE
ENSMUSG00000030956	0.368754	4.70734	6.4254	0.01125	0.0494705	Fam53b	7	-1	132712082	132813886	non-DE
ENSMUSG00000028977	0.36874	2.68998	3.01273	0.0826129	0.180378	Casz1	4	1	148804429	148954889	non-DE
ENSMUSG00000032400	0.368731	2.64817	8.72842	0.00313289	0.0209136	Zwilch	9	-1	64137144	64173104	non-DE
ENSMUSG00000028836	0.368665	7.07905	16.73	4.30945e-05	0.00129201	Slc30a2	4	1	134343181	134354484	non-DE
ENSMUSG00000040964	0.368601	4.94649	7.01177	0.00809757	0.0399288	Arhgef10l	4	-1	140514485	140666012	non-DE
ENSMUSG00000005142	0.368531	5.0588	7.09821	0.00771608	0.0385995	Man2b1	8	1	85083270	85098282	non-DE
ENSMUSG00000054843	0.368406	5.59077	6.87135	0.00875886	0.0420176	Atrnl1	19	1	57611034	58133343	non-DE
ENSMUSG00000027551	0.368294	5.77221	7.6298	0.00574118	0.0315131	Zfp64	2	-1	168893331	168955587	non-DE
ENSMUSG00000002052	0.368265	6.4406	3.02755	0.0818618	0.179487	Supt6	11	-1	78206746	78245987	non-DE
ENSMUSG00000018604	0.368211	4.8581	5.08267	0.0241661	0.080832	Tbx3	5	1	119670669	119684724	non-DE
ENSMUSG00000038369	0.368169	5.62518	3.17297	0.074866	0.16913	Ncoa6	2	-1	155390656	155473894	non-DE
ENSMUSG00000018678	0.368002	4.54359	5.44401	0.0196355	0.0703818	Sp2	11	-1	96953341	96982959	non-DE
ENSMUSG00000059439	0.367851	3.99951	5.48245	0.0192083	0.0695275	Bcas3	11	1	85353167	85826058	non-DE
ENSMUSG00000044433	0.367811	5.59986	3.99263	0.0456998	0.122496	Camsap3	8	1	3587293	3609075	non-DE
ENSMUSG00000055817	0.367777	7.17886	8.25925	0.00405449	0.0250496	Mta3	17	1	83706163	83821516	non-DE
ENSMUSG00000041945	0.36767	1.63068	4.21642	0.0400344	0.11196	Mfsd9	1	-1	40772038	40790687	non-DE
ENSMUSG00000025931	0.367632	3.50011	7.80935	0.00519766	0.0295915	Paqr8	1	1	20890606	20939650	non-DE
ENSMUSG00000038780	0.367403	5.72416	3.93212	0.0473721	0.125409	Smurf1	5	-1	144876495	144965847	non-DE
ENSMUSG00000031971	0.367335	2.26956	12.1104	0.000501426	0.00638843	Ccsap	8	-1	123840831	123860209	non-DE
ENSMUSG00000022831	0.367231	3.13744	1.83204	0.175886	0.302087	Hcls1	16	1	36934983	36963212	non-DE
ENSMUSG00000040560	0.36722	4.52911	6.75439	0.00935175	0.0438357	Wdr7	18	1	63708685	63989776	non-DE
ENSMUSG00000039159	0.367192	7.2065	6.8659	0.00878561	0.0420654	Ube2h	6	-1	30211289	30304539	non-DE
ENSMUSG00000038611	0.367137	6.17371	3.95649	0.046691	0.124187	Phrf1	7	1	141228784	141262750	non-DE
ENSMUSG00000032737	0.367013	6.30499	9.14506	0.0024939	0.0180588	Inppl1	7	-1	101822632	101838229	non-DE
ENSMUSG00000021244	0.366839	4.60905	4.30013	0.0381095	0.108484	Ylpm1	12	1	84996321	85070515	non-DE
ENSMUSG00000057230	0.366475	5.30112	4.28907	0.038358	0.108949	Aak1	6	1	86849517	87003223	non-DE
ENSMUSG00000022802	0.366411	2.69667	5.15235	0.0232149	0.0784857	Lmln	16	1	33062521	33127695	non-DE
ENSMUSG00000040712	0.366325	4.59969	6.56911	0.0103764	0.0470564	Camta2	11	-1	70669463	70688105	non-DE
ENSMUSG00000035311	0.366294	5.04666	13.2248	0.000276268	0.00426062	Gnptab	10	1	88379132	88447329	non-DE
ENSMUSG00000039852	0.366282	6.24529	3.25884	0.0710393	0.163755	Rere	4	1	150281646	150621966	non-DE
ENSMUSG00000035566	0.36624	1.39846	3.59107	0.0580908	0.143698	Pcdh17	14	1	84443563	84539002	non-DE
ENSMUSG00000039377	0.366021	3.27853	6.46085	0.0110277	0.0487659	Hlx	1	-1	184727140	184732619	non-DE
ENSMUSG00000022587	0.365935	7.83452	12.6594	0.000373692	0.00521693	Ly6e	15	1	74955051	74959905	non-DE
ENSMUSG00000036502	0.365415	1.56883	5.82981	0.0157568	0.0613695	Tmem255a	X	-1	38196573	38252439	non-DE
ENSMUSG00000059430	0.36524	2.74529	5.2908	0.0214383	0.0744916	Actg2	6	-1	83512905	83536265	non-DE
ENSMUSG00000110744	0.365045	0.0876872	3.49099	0.0617037	0.149314	Gm5171	10	-1	30780857	30782271	non-DE
ENSMUSG00000026074	0.364724	8.00055	7.47033	0.00627241	0.0333577	Map4k4	1	1	39900913	40026310	non-DE
ENSMUSG00000047388	0.364442	6.3158	8.40721	0.00373736	0.0237119	Atmin	8	1	116943393	116960445	non-DE
ENSMUSG00000025813	0.364316	5.93677	12.6283	0.000379943	0.00525348	Homer2	7	-1	81600481	81707527	non-DE
ENSMUSG00000026918	0.364303	7.38684	9.67257	0.00187039	0.0152018	Brd3	2	-1	27445579	27507662	non-DE
ENSMUSG00000056643	0.363855	4.19369	7.66867	0.00561879	0.0311245	Chst13	6	-1	90308349	90325185	non-DE
ENSMUSG00000020717	0.363848	7.17518	7.04617	0.0079435	0.039407	Pecam1	11	-1	106654217	106750628	non-DE
ENSMUSG00000015968	0.363249	1.43476	3.7629	0.0524017	0.133958	Cacna1d	14	-1	30039939	30491455	non-DE
ENSMUSG00000049230	0.36321	1.30687	7.58883	0.0058731	0.0319532	Gm9833	3	1	10088110	10092565	non-DE
ENSMUSG00000002812	0.363154	6.68389	4.59565	0.0320533	0.0974414	Flii	11	-1	60714123	60727263	non-DE
ENSMUSG00000038116	0.363075	5.94192	10.7408	0.001048	0.0104079	Phf20	2	1	156196466	156309952	non-DE
ENSMUSG00000038047	0.363037	3.52173	13.3884	0.000253185	0.00402761	Haus6	4	-1	86578855	86612055	non-DE
ENSMUSG00000002365	0.362911	7.58097	9.37493	0.00219973	0.0168055	Snx9	17	1	5841329	5931954	non-DE
ENSMUSG00000027650	0.362906	4.33799	7.43542	0.00639525	0.0337595	Tti1	2	-1	157981803	158028433	non-DE
ENSMUSG00000033364	0.362885	4.24374	6.26522	0.0123131	0.052465	Usp37	1	-1	74435511	74544284	non-DE
ENSMUSG00000025227	0.362866	2.23017	3.33241	0.0679272	0.159044	Mfsd13a	19	1	46341121	46375252	non-DE
ENSMUSG00000030935	0.362471	1.75916	5.76289	0.0163681	0.0629702	Acsm3	7	1	119760923	119787513	non-DE
ENSMUSG00000016757	0.36242	5.74767	6.28488	0.0121772	0.0520746	Ttll12	15	-1	83575090	83595157	non-DE
ENSMUSG00000005087	0.362293	3.65786	10.7724	0.00103027	0.010276	Cd44	2	-1	102811141	102901665	non-DE
ENSMUSG00000026187	0.362158	3.64511	11.9194	0.000555526	0.00686135	Xrcc5	1	1	72307421	72394952	non-DE
ENSMUSG00000029016	0.362124	4.95022	5.84032	0.0156629	0.0610949	Clcn6	4	-1	148004259	148038821	non-DE
ENSMUSG00000042507	0.362117	5.73003	3.91586	0.0478326	0.126062	Elmsan1	12	-1	84149176	84218881	non-DE
ENSMUSG00000042700	0.362067	6.23584	8.70979	0.00316506	0.021034	Sipa1l1	12	1	82169320	82451786	non-DE
ENSMUSG00000021957	0.362045	5.76114	9.3885	0.00218351	0.0167185	Tkt	14	1	30548359	30574720	non-DE
ENSMUSG00000034762	0.361966	5.06214	3.74405	0.0529958	0.134821	Glis1	4	1	107434591	107635061	non-DE
ENSMUSG00000052504	0.361965	0.0353896	2.4094	0.120609	0.232282	Epha3	16	-1	63543534	63864175	non-DE
ENSMUSG00000001924	0.361946	7.22641	9.91141	0.00164257	0.0139515	Uba1	X	1	20658326	20683179	non-DE
ENSMUSG00000056904	0.361815	2.73248	2.75529	0.096933	0.200472	Gm5620	9	1	91097149	91098496	non-DE
ENSMUSG00000022807	0.361577	5.55083	7.45686	0.0063195	0.0334971	Osbpl11	16	1	33185071	33243312	non-DE
ENSMUSG00000061175	0.361426	4.80766	4.44131	0.0350793	0.103056	Fnip2	3	-1	79455974	79567796	non-DE
ENSMUSG00000032477	0.361419	3.23003	9.42056	0.00214566	0.0165362	Cdc25a	9	1	109875579	109893895	non-DE
ENSMUSG00000036957	0.36137	0.564317	2.55087	0.110233	0.218326	Lrfn3	7	-1	30355489	30362772	non-DE
ENSMUSG00000026814	0.361334	5.55203	4.35672	0.0368632	0.106045	Eng	2	1	32646595	32682669	non-DE
ENSMUSG00000041559	0.361284	2.60685	4.74201	0.0294347	0.0921337	Fmod	1	1	134037254	134048277	non-DE
ENSMUSG00000036534	0.361277	6.33485	9.54444	0.00200556	0.0158009	Slc38a7	8	-1	95835920	95853539	non-DE
ENSMUSG00000018395	0.36108	4.85204	5.63785	0.0175767	0.0659463	Kif3a	11	1	53567379	53601967	non-DE
ENSMUSG00000041329	0.360998	0.637525	3.25442	0.0712313	0.163957	Atp1b2	11	-1	69599736	69605942	non-DE
ENSMUSG00000035095	0.360986	1.84626	3.9245	0.0475873	0.125673	Fam167a	14	1	63436394	63465498	non-DE
ENSMUSG00000037519	0.360929	7.37432	7.93492	0.00484897	0.0282581	Ppfia1	7	-1	144476758	144553729	non-DE
ENSMUSG00000048895	0.360927	2.92923	5.58516	0.0181132	0.0671096	Cdk5r1	11	1	80477023	80481184	non-DE
ENSMUSG00000040865	0.360824	4.65462	4.28952	0.0383479	0.108943	Ino80d	1	-1	62958418	63114667	non-DE
ENSMUSG00000028868	0.360798	6.61739	4.32934	0.0374608	0.107219	Wasf2	4	1	133130505	133199756	non-DE
ENSMUSG00000022141	0.36076	5.44247	3.7937	0.0514457	0.132209	Nipbl	15	-1	8290617	8444463	non-DE
ENSMUSG00000020671	0.360753	7.43889	10.8132	0.00100779	0.0101511	Rab10	12	-1	3247428	3309969	non-DE
ENSMUSG00000029467	0.360623	6.42342	3.21841	0.0728143	0.166114	Atp2a2	5	-1	122453513	122502225	non-DE
ENSMUSG00000037490	0.360604	4.41718	11.4563	0.000712511	0.00811952	Slc2a12	10	1	22645011	22704285	non-DE
ENSMUSG00000030199	0.360531	4.64375	7.0551	0.00790399	0.0392893	Etv6	6	1	134035700	134270158	non-DE
ENSMUSG00000025792	0.360431	5.46806	14.4783	0.000141781	0.00264957	Slc25a10	11	1	120491840	120499187	non-DE
ENSMUSG00000023088	0.360286	4.87921	4.67593	0.0305882	0.0944908	Abcc1	16	1	14361558	14475737	non-DE
ENSMUSG00000060716	0.360184	7.50279	3.47866	0.0621651	0.149947	Plekhh1	12	1	79029163	79081655	non-DE
ENSMUSG00000102918	0.360112	2.02578	2.53918	0.111053	0.219498	Pcdhgc3	18	1	37806364	37841873	non-DE
ENSMUSG00000064210	0.360007	6.02367	3.12935	0.0768943	0.172235	Ano6	15	1	95790843	95974751	non-DE
ENSMUSG00000022833	0.359939	2.20093	8.32323	0.00391413	0.0244387	Ccdc14	16	1	34690616	34725202	non-DE
ENSMUSG00000025207	0.359856	4.60371	5.86242	0.0154675	0.0608291	Sema4g	19	1	44989101	45003397	non-DE
ENSMUSG00000020642	0.3598	4.31958	8.08399	0.0044658	0.0268062	Rnf144a	12	-1	26300964	26415254	non-DE
ENSMUSG00000031951	0.359793	2.281	5.34901	0.020734	0.0730133	Tmem231	8	-1	111912011	111933881	non-DE
ENSMUSG00000026039	0.359783	1.09868	6.22921	0.012566	0.0531901	Sgo2a	1	1	57995971	58025899	non-DE
ENSMUSG00000020782	0.359682	7.15604	3.68775	0.0548136	0.138061	Llgl2	11	1	115824049	115855780	non-DE
ENSMUSG00000042744	0.359438	5.37953	3.76011	0.0524892	0.134062	Hectd4	5	1	121220219	121368577	non-DE
ENSMUSG00000021373	0.359384	-0.165402	3.22713	0.0724276	0.165673	Cap2	13	1	46501848	46650281	non-DE
ENSMUSG00000036676	0.359321	4.83078	7.21602	0.00722559	0.0368412	Tmtc3	10	-1	100443902	100487350	non-DE
ENSMUSG00000078945	0.359229	-0.00573421	3.8882	0.0486266	0.127527	Naip2	13	-1	100144063	100202092	non-DE
ENSMUSG00000020178	0.35904	0.886095	2.53302	0.111486	0.220109	Adora2a	10	1	75316877	75334784	non-DE
ENSMUSG00000035873	0.359025	6.03624	16.8528	4.03936e-05	0.00124184	Pawr	10	1	108332121	108414240	non-DE
ENSMUSG00000006386	0.358963	4.82761	7.29267	0.00692365	0.0357091	Tek	4	1	94739289	94874976	non-DE
ENSMUSG00000027379	0.358897	2.83364	4.56395	0.0326517	0.0985193	Bub1	2	-1	127801122	127831865	non-DE
ENSMUSG00000074607	0.35867	4.85165	4.21643	0.0400344	0.11196	Tox2	2	1	163203125	163324170	non-DE
ENSMUSG00000042719	0.358646	4.62252	8.85449	0.00292369	0.0200227	Naa25	5	1	121397936	121444378	non-DE
ENSMUSG00000051177	0.358613	0.468325	4.73055	0.0296313	0.0925897	Plcb1	2	1	134786067	135475258	non-DE
ENSMUSG00000039684	0.358586	2.64912	8.5628	0.00343102	0.0222678	Gm5422	10	1	31248023	31251043	non-DE
ENSMUSG00000005566	0.358574	6.923	8.0043	0.00466664	0.0275734	Trim28	7	1	12999114	13031035	non-DE
ENSMUSG00000001089	0.358548	7.0158	4.54428	0.0330289	0.0992972	Luzp1	4	1	136469761	136554780	non-DE
ENSMUSG00000035900	0.358531	5.48484	8.37285	0.00380867	0.0240028	Gramd4	15	1	86057695	86137634	non-DE
ENSMUSG00000020549	0.358422	3.67656	5.75534	0.0164386	0.0631529	Elac2	11	1	64979038	65002069	non-DE
ENSMUSG00000026615	0.358343	6.30781	4.00718	0.0453069	0.121951	Eprs	1	1	185363044	185428360	non-DE
ENSMUSG00000111521	0.358177	0.170767	4.15726	0.0414563	0.11483	Gm48529	9	1	45930112	45933738	non-DE
ENSMUSG00000032340	0.358109	4.39807	3.94903	0.0468983	0.124551	Neo1	9	-1	58874687	59036441	non-DE
ENSMUSG00000049354	0.358024	6.10649	5.67138	0.0172439	0.0652042	Dcaf7	11	1	106036872	106059324	non-DE
ENSMUSG00000028763	0.357765	8.45075	1.26932	0.259894	0.397343	Hspg2	4	1	137468769	137570630	non-DE
ENSMUSG00000059208	0.357761	6.59095	6.92531	0.00849841	0.0412297	Hnrnpm	17	-1	33646233	33686860	non-DE
ENSMUSG00000056427	0.357751	3.37452	1.9984	0.157465	0.278533	Slit3	11	1	35121224	35708507	non-DE
ENSMUSG00000021506	0.357694	3.52601	3.35907	0.0668358	0.157406	Pitx1	13	-1	55825051	55836192	non-DE
ENSMUSG00000029763	0.357641	5.14697	8.74025	0.00311261	0.0208126	Exoc4	6	1	33249085	33973979	non-DE
ENSMUSG00000041000	0.357435	4.07781	3.82449	0.0505087	0.130727	Trim62	4	1	128883580	128911328	non-DE
ENSMUSG00000015755	0.357431	7.59179	10.5541	0.00115929	0.011085	Tab2	10	-1	7905653	7956230	non-DE
ENSMUSG00000048701	0.357424	6.5434	3.16373	0.0752908	0.1699	Ccdc6	10	1	70097121	70193200	non-DE
ENSMUSG00000030172	0.357345	5.48898	4.56101	0.0327078	0.0986467	Erc1	6	-1	119570796	119848167	non-DE
ENSMUSG00000037993	0.357334	5.13433	3.32474	0.0682446	0.159497	Dhx38	8	-1	109548011	109565861	non-DE
ENSMUSG00000036896	0.357264	1.30203	5.30176	0.0213039	0.0742893	C1qc	4	-1	136889804	136893065	non-DE
ENSMUSG00000002771	0.357142	1.09248	2.26857	0.132022	0.247002	Grin2d	7	-1	45831883	45878378	non-DE
ENSMUSG00000000957	0.357134	5.69829	3.96207	0.0465365	0.12394	Mmp14	14	1	54431612	54445364	non-DE
ENSMUSG00000112980	0.357035	1.30217	3.97542	0.0461688	0.123309	D430020J02Rik	12	-1	116401947	116405210	non-DE
ENSMUSG00000033966	0.356905	0.414963	3.87348	0.0490547	0.128184	Cdkl4	17	-1	80523550	80577813	non-DE
ENSMUSG00000026491	0.356889	6.29218	4.19965	0.0404324	0.112758	Ahctf1	1	-1	179744894	179803680	non-DE
ENSMUSG00000033306	0.356714	5.94422	4.24966	0.0392582	0.110573	Lpp	16	1	24393507	24992578	non-DE
ENSMUSG00000051235	0.356639	1.96613	5.61626	0.0177946	0.0664446	Gen1	12	-1	11238920	11265801	non-DE
ENSMUSG00000045751	0.356457	2.43239	9.85221	0.00169628	0.0142791	Mms22l	4	1	24496451	24602950	non-DE
ENSMUSG00000022371	0.35641	3.38905	3.83627	0.0501551	0.130074	Col14a1	15	1	55307750	55520803	non-DE
ENSMUSG00000031292	0.356215	1.10978	7.10917	0.00766908	0.0384188	Cdkl5	X	-1	160771923	160994704	non-DE
ENSMUSG00000038368	0.356214	2.83999	5.24429	0.022019	0.0758754	Focad	4	1	88094629	88411011	non-DE
ENSMUSG00000031480	0.356176	3.20597	9.58607	0.0019606	0.015611	Thsd1	8	1	22227313	22261334	non-DE
ENSMUSG00000058809	0.356169	3.34382	4.9813	0.0256228	0.0836776	Hspd1-ps3	11	1	41498737	41500458	non-DE
ENSMUSG00000025504	0.355891	7.55608	6.53521	0.0105759	0.0475111	Eps8l2	7	1	141338880	141363020	non-DE
ENSMUSG00000029869	0.355857	1.87104	5.24645	0.0219916	0.0758596	Ephb6	6	1	41605482	41620509	non-DE
ENSMUSG00000038774	0.355783	5.0137	4.87293	0.0272812	0.0872283	Ascc3	10	1	50592669	50851485	non-DE
ENSMUSG00000021488	0.355698	7.26048	4.6077	0.0318286	0.0970715	Nsd1	13	1	55209782	55318325	non-DE
ENSMUSG00000041890	0.355634	7.61095	12.4765	0.000412102	0.00558088	Git2	5	-1	114727407	114775517	non-DE
ENSMUSG00000034258	0.35555	7.00708	5.9762	0.0145002	0.0583059	Flvcr2	12	1	85746539	85813585	non-DE
ENSMUSG00000045962	0.355341	8.20988	3.00799	0.0828551	0.180684	Wnk1	6	-1	119923969	120038672	non-DE
ENSMUSG00000000901	0.355305	4.93289	9.97362	0.00158799	0.0136436	Mmp11	10	-1	75923222	75936496	non-DE
ENSMUSG00000024542	0.355156	4.4877	4.68284	0.0304654	0.0942555	Cep192	18	1	67800107	67885170	non-DE
ENSMUSG00000001227	0.355117	2.1986	3.78002	0.051868	0.133004	Sema6b	17	-1	56123085	56140343	non-DE
ENSMUSG00000033713	0.3551	5.54363	4.52362	0.0334301	0.100014	Foxn3	12	-1	99190078	99563582	non-DE
ENSMUSG00000020211	0.355092	4.43029	4.52035	0.0334939	0.100099	Sf3a2	10	1	80798198	80804924	non-DE
ENSMUSG00000033684	0.354717	7.0997	8.71464	0.00315664	0.0210116	Qsox1	1	-1	155776029	155812889	non-DE
ENSMUSG00000035683	0.354458	2.75254	7.68741	0.00556074	0.0308755	Melk	4	1	44300876	44364675	non-DE
ENSMUSG00000029878	0.35445	2.20259	8.75508	0.0030874	0.0207224	Dbpht2	12	1	74296668	74302008	non-DE
ENSMUSG00000020935	0.354078	6.91494	10.303	0.00132814	0.012157	Dcakd	11	-1	102994047	103028333	non-DE
ENSMUSG00000041297	0.354012	6.16689	6.02404	0.0141123	0.0573142	Cdk13	13	-1	17710315	17805097	non-DE
ENSMUSG00000024271	0.353899	5.80485	7.45241	0.00633517	0.033555	Elp2	18	1	24602866	24639507	non-DE
ENSMUSG00000040093	0.353777	4.19988	14.3335	0.000153113	0.00280119	Bmf	2	-1	118528757	118549687	non-DE
ENSMUSG00000005107	0.353738	2.66061	6.78665	0.00918423	0.0433555	Slc2a9	5	-1	38349273	38503143	non-DE
ENSMUSG00000024754	0.353533	3.59062	3.67654	0.0551832	0.138634	Cemip2	19	1	21778342	21858360	non-DE
ENSMUSG00000034610	0.353501	6.64589	5.8394	0.0156712	0.0611034	Tut4	4	1	108459426	108559421	non-DE
ENSMUSG00000031441	0.35329	8.5033	4.79504	0.0285419	0.0900578	Atp11a	8	1	12757014	12868728	non-DE
ENSMUSG00000027171	0.353232	5.349	5.64191	0.0175361	0.0658337	Prrg4	2	-1	104830741	104849876	non-DE
ENSMUSG00000031434	0.353076	7.01044	7.81289	0.00518748	0.0295455	Morc4	X	-1	139821632	139871677	non-DE
ENSMUSG00000042608	0.353074	6.72631	6.62392	0.0100618	0.0460947	Stk40	4	1	126103957	126141029	non-DE
ENSMUSG00000021978	0.353064	5.61163	6.36958	0.0116093	0.0505166	Extl3	14	-1	65052060	65149855	non-DE
ENSMUSG00000033222	0.35305	3.7048	15.0942	0.000102277	0.00220152	Ttf2	3	-1	100938860	100969663	non-DE
ENSMUSG00000004044	0.353018	6.03982	6.11395	0.0134119	0.0555244	Cavin1	11	-1	100956733	100970887	non-DE
ENSMUSG00000027067	0.352898	6.65396	11.9329	0.000551525	0.00683074	Ssrp1	2	1	85037234	85047109	non-DE
ENSMUSG00000027895	0.352526	4.20854	4.40301	0.0358755	0.104241	Kcnc4	3	-1	107438303	107459552	non-DE
ENSMUSG00000061436	0.352453	3.40958	1.85132	0.17363	0.299412	Hipk2	6	-1	38694390	38876165	non-DE
ENSMUSG00000035441	0.352351	6.16206	3.38343	0.0658548	0.156052	Myo1d	11	-1	80482126	80780025	non-DE
ENSMUSG00000037335	0.35223	7.77803	4.3038	0.0380274	0.108358	Hand1	11	-1	57828705	57832818	non-DE
ENSMUSG00000014778	0.352151	5.75722	8.93254	0.00280134	0.0195197	Fhod1	8	-1	105329163	105347953	non-DE
ENSMUSG00000021806	0.352088	6.89267	3.3102	0.0688513	0.160358	Nid2	14	1	19751265	19811787	non-DE
ENSMUSG00000025261	0.351905	7.20943	3.5823	0.0583983	0.144103	Huwe1	X	1	151800807	151935417	non-DE
ENSMUSG00000003119	0.351904	4.80637	2.97603	0.0845066	0.183275	Cdk12	11	1	98203059	98278504	non-DE
ENSMUSG00000035632	0.351754	4.96702	3.74819	0.0528646	0.134671	Cnot3	7	1	3645268	3661109	non-DE
ENSMUSG00000027253	0.35172	1.68896	1.81218	0.178247	0.30492	Lrp4	2	1	91457511	91513779	non-DE
ENSMUSG00000039328	0.351696	1.14093	3.77818	0.051925	0.133102	Rnf122	8	1	31111820	31131482	non-DE
ENSMUSG00000024498	0.351611	5.3863	7.55283	0.00599159	0.032323	Tcerg1	18	1	42511487	42575793	non-DE
ENSMUSG00000034154	0.351504	4.7643	4.20186	0.0403797	0.1127	Ino80	2	-1	119373042	119477687	non-DE
ENSMUSG00000090877	0.351503	3.19443	2.43509	0.118647	0.229723	Hspa1b	17	-1	34956436	34959238	non-DE
ENSMUSG00000030738	0.351324	7.57169	5.48657	0.0191631	0.0694351	Eif3c	7	-1	126546455	126566411	non-DE
ENSMUSG00000037003	0.351246	6.41968	4.27198	0.0387457	0.109649	Tns2	15	1	102100413	102116401	non-DE
ENSMUSG00000000751	0.351157	5.16784	19.4725	1.02057e-05	0.000484309	Rpa1	11	-1	75298166	75348324	non-DE
ENSMUSG00000026135	0.350794	2.92249	2.93718	0.0865619	0.185824	Zfp142	1	-1	74565127	74588246	non-DE
ENSMUSG00000074916	0.350537	3.84544	6.55828	0.0104397	0.0472141	Chst14	2	1	118926496	118928585	non-DE
ENSMUSG00000032582	0.350517	5.61561	4.80275	0.0284143	0.0898155	Rbm6	9	-1	107773559	107873237	non-DE
ENSMUSG00000020679	0.350446	1.70805	4.4895	0.0341036	0.101297	Hnf1b	11	1	83850063	83905819	non-DE
ENSMUSG00000075296	0.350383	4.35365	10.3565	0.00129021	0.0119569	Aldh3b2	19	1	3972328	3981646	non-DE
ENSMUSG00000023079	0.350317	3.03153	5.18786	0.0227452	0.0776023	Gtf2ird1	5	-1	134357656	134456716	non-DE
ENSMUSG00000028430	0.35028	5.68309	3.12882	0.0769195	0.172235	Nol6	4	-1	41114427	41124455	non-DE
ENSMUSG00000032883	0.350235	6.96955	13.8935	0.00019347	0.0033084	Acsl3	1	1	78657825	78707743	non-DE
ENSMUSG00000005580	0.350235	3.76737	2.84991	0.0913792	0.192841	Adcy9	16	-1	4287529	4420498	non-DE
ENSMUSG00000025195	0.350108	5.4103	4.6151	0.0316916	0.096758	Dnmbp	19	-1	43846821	43940191	non-DE
ENSMUSG00000033335	0.349827	7.36969	5.68464	0.0171141	0.0648172	Dnm2	9	1	21424908	21507759	non-DE
ENSMUSG00000039509	0.349804	4.45005	11.1282	0.000850249	0.00902916	Nup133	8	-1	123897123	123949265	non-DE
ENSMUSG00000073295	0.349734	-0.162394	1.31306	0.251842	0.38883	Nudt11	X	1	6047453	6055110	non-DE
ENSMUSG00000063382	0.349391	5.1802	2.23968	0.134509	0.250129	Bcl9l	9	1	44482825	44511896	non-DE
ENSMUSG00000031976	0.349214	4.28264	4.67268	0.0306461	0.0945455	Urb2	8	1	124021508	124048505	non-DE
ENSMUSG00000101523	0.349168	4.48355	10.3121	0.00132161	0.0121053	Gm10031	1	1	156524012	156526664	non-DE
ENSMUSG00000005583	0.349082	2.5337	8.06028	0.00452462	0.027033	Mef2c	13	1	83504034	83667080	non-DE
ENSMUSG00000045252	0.349077	5.24733	4.49271	0.0340398	0.101154	Zfp574	7	1	25072567	25083492	non-DE
ENSMUSG00000037784	0.349058	0.18561	3.99828	0.0455466	0.12227	Dzip1l	9	1	99629496	99669256	non-DE
ENSMUSG00000061755	0.348999	5.6735	3.2776	0.0702315	0.162689	Bod1l	5	-1	41787538	41844315	non-DE
ENSMUSG00000027978	0.348916	2.5735	3.99479	0.0456412	0.122385	Prss12	3	1	123446913	123506597	non-DE
ENSMUSG00000084128	0.348903	5.8708	7.8288	0.00514202	0.0294	Esrp2	8	-1	106130319	106136974	non-DE
ENSMUSG00000054611	0.348852	5.62854	3.32507	0.0682312	0.159497	Kdm2a	19	-1	4314419	4398285	non-DE
ENSMUSG00000109325	0.348642	5.92093	5.1342	0.0234589	0.0791024	Krt8-ps	7	1	23357125	23358069	non-DE
ENSMUSG00000034247	0.348365	6.04509	5.45497	0.0195127	0.0701803	Plekhm1	11	-1	103364275	103412687	non-DE
ENSMUSG00000066026	0.348215	5.5461	17.0725	3.59802e-05	0.00115027	Dhrs3	4	1	144892827	144928209	non-DE
ENSMUSG00000028152	0.348114	3.85309	7.66193	0.0056398	0.0311844	Tspan5	3	1	138742195	138907905	non-DE
ENSMUSG00000106990	0.348102	1.47202	3.3565	0.0669402	0.157516	Gm42547	6	-1	28211008	28214805	non-DE
ENSMUSG00000032727	0.348021	5.02652	8.10079	0.0044246	0.0266154	Mier3	13	1	111680979	111718596	non-DE
ENSMUSG00000045877	0.347932	1.15052	4.17255	0.0410839	0.114102	4933415A04Rik	11	1	43587040	43589048	non-DE
ENSMUSG00000053716	0.347879	3.16558	4.18582	0.0407636	0.113525	Dusp7	9	1	106368632	106375724	non-DE
ENSMUSG00000067150	0.347878	4.31496	4.355	0.0369005	0.10611	Xpo5	17	1	46202782	46243598	non-DE
ENSMUSG00000036693	0.347859	4.62954	6.45841	0.0110429	0.0488025	Nop14	5	-1	34638536	34660148	non-DE
ENSMUSG00000044700	0.347749	4.43719	4.43479	0.0352136	0.103195	Tmem201	4	-1	149715375	149738044	non-DE
ENSMUSG00000051278	0.347665	1.6914	6.31283	0.0119868	0.051619	Zgrf1	3	1	127553489	127618023	non-DE
ENSMUSG00000034037	0.347294	4.03894	5.50997	0.0189084	0.0689714	Fgd5	6	1	91978878	92076004	non-DE
ENSMUSG00000003435	0.347103	7.44983	5.28775	0.021476	0.0745309	Supt5	7	-1	28314891	28338746	non-DE
ENSMUSG00000038894	0.346899	5.29555	2.68861	0.101068	0.205921	Irs2	8	-1	10984681	11008458	non-DE
ENSMUSG00000036057	0.346896	5.77745	3.92469	0.0475819	0.125673	Ptpn23	9	-1	110385082	110408213	non-DE
ENSMUSG00000079173	0.346793	0.871142	3.22499	0.0725224	0.165742	Zan	5	-1	137378637	137477064	non-DE
ENSMUSG00000020777	0.346744	6.66942	6.88192	0.0087072	0.0419405	Acox1	11	-1	116171888	116199045	non-DE
ENSMUSG00000039943	0.346709	4.84745	8.3798	0.00379414	0.0239252	Plcb4	2	1	135659011	136014593	non-DE
ENSMUSG00000025184	0.346659	4.18444	8.54246	0.00346956	0.0224663	R3hcc1l	19	1	42518759	42592343	non-DE
ENSMUSG00000033161	0.346565	9.10776	3.91541	0.0478455	0.126072	Atp1a1	3	-1	101576219	101604684	non-DE
ENSMUSG00000024104	0.346539	5.13366	5.29466	0.0213909	0.0744477	Washc2	6	1	116208038	116262686	non-DE
ENSMUSG00000112550	0.346386	0.361107	3.18633	0.0742566	0.16827	Gm6627	10	-1	52341272	52343657	non-DE
ENSMUSG00000039952	0.346236	7.70423	2.82244	0.0929549	0.195156	Dag1	9	-1	108204634	108263958	non-DE
ENSMUSG00000030055	0.346196	1.60617	3.78432	0.051735	0.132807	Rab43	6	-1	87788853	87812164	non-DE
ENSMUSG00000056919	0.346167	2.39875	3.89951	0.0483001	0.126845	Cep162	9	-1	87189577	87255536	non-DE
ENSMUSG00000055452	0.346101	0.897863	2.8088	0.0937482	0.196209	Gm7353	7	-1	3109020	3111963	non-DE
ENSMUSG00000043439	0.346053	6.88504	9.65206	0.00189139	0.0152846	Epop	11	-1	97627389	97629702	non-DE
ENSMUSG00000041298	0.346023	3.03061	6.48518	0.0108777	0.0483903	Katnal1	5	-1	148871584	148929320	non-DE
ENSMUSG00000002129	0.345957	5.94704	6.59332	0.0102362	0.0466492	Sf3a1	11	1	4160350	4182541	non-DE
ENSMUSG00000035064	0.345849	5.95833	3.79942	0.0512704	0.131926	Eef2k	7	1	120842831	120907450	non-DE
ENSMUSG00000070576	0.345753	2.77848	1.30635	0.253056	0.390221	Mn1	5	1	111417362	111457033	non-DE
ENSMUSG00000038244	0.34557	5.73845	2.97433	0.0845952	0.183376	Mical2	7	1	112225856	112413106	non-DE
ENSMUSG00000051379	0.345566	4.19893	9.83837	0.00170909	0.0143522	Flrt3	2	-1	140650914	140671469	non-DE
ENSMUSG00000055024	0.345526	5.70047	2.73095	0.098421	0.202749	Ep300	15	1	81585351	81652077	non-DE
ENSMUSG00000000568	0.34524	6.17612	5.77228	0.0162809	0.0627902	Hnrnpd	5	-1	99955935	99978938	non-DE
ENSMUSG00000071054	0.345193	5.66318	4.30679	0.0379606	0.108246	Safb	17	1	56584825	56606294	non-DE
ENSMUSG00000022983	0.345063	5.15136	5.15375	0.0231963	0.07846	Scaf4	16	-1	90225680	90284503	non-DE
ENSMUSG00000027933	0.345026	6.47747	7.75138	0.00536714	0.0302399	Ints3	3	-1	90391388	90433622	non-DE
ENSMUSG00000052854	0.344957	9.3721	2.8493	0.0914139	0.192841	Nrk	X	1	138914430	139010532	non-DE
ENSMUSG00000054115	0.344827	3.76155	8.13458	0.0043429	0.0262793	Skp2	15	-1	9111985	9155425	non-DE
ENSMUSG00000057637	0.344794	6.17615	4.78456	0.0287159	0.090433	Prdm2	4	-1	143107391	143212995	non-DE
ENSMUSG00000028032	0.344745	5.998	11.6984	0.000625537	0.0074322	Papss1	3	1	131564768	131643671	non-DE
ENSMUSG00000031826	0.344707	5.33831	7.82374	0.00515645	0.029428	Usp10	8	1	119910360	119957560	non-DE
ENSMUSG00000050148	0.344701	5.46908	5.93353	0.0148554	0.0592793	Ubqln2	X	1	153498227	153501570	non-DE
ENSMUSG00000031756	0.344451	2.35422	8.44125	0.00366803	0.0233874	Cenpn	8	1	116921730	116941507	non-DE
ENSMUSG00000042506	0.344366	6.88582	5.54273	0.0185576	0.0682382	Usp22	11	-1	61151785	61175055	non-DE
ENSMUSG00000020787	0.344354	2.11944	6.47836	0.0109196	0.0485154	P2rx1	11	1	72999103	73015200	non-DE
ENSMUSG00000005907	0.344321	4.91856	7.60211	0.00583002	0.0317964	Pex1	5	1	3596066	3637232	non-DE
ENSMUSG00000031790	0.344242	7.9781	2.47689	0.11553	0.225449	Mmp15	8	1	95352268	95375080	non-DE
ENSMUSG00000000168	0.344221	5.68559	10.131	0.00145795	0.0128945	Dlat	9	-1	50634633	50659780	non-DE
ENSMUSG00000037275	0.344084	3.93516	6.03608	0.0140164	0.0570581	Gemin5	11	-1	58120002	58168539	non-DE
ENSMUSG00000050410	0.344056	2.19291	6.86571	0.00878653	0.0420654	Tcf19	17	-1	35512734	35516824	non-DE
ENSMUSG00000037139	0.343836	4.53885	9.39602	0.00217457	0.0166772	Myom3	4	1	135759715	135815564	non-DE
ENSMUSG00000047090	0.343671	1.18933	6.1171	0.013388	0.0554995	Tmem198b	10	-1	128800036	128804370	non-DE
ENSMUSG00000051391	0.343651	7.94052	6.23359	0.0125349	0.0531559	Ywhag	5	-1	135908409	135934616	non-DE
ENSMUSG00000036403	0.34359	2.39534	5.36792	0.0205105	0.0724444	Cep135	5	1	76588698	76646466	non-DE
ENSMUSG00000030683	0.343494	0.473799	1.80044	0.179659	0.306688	Sez6l2	7	1	126950563	126970606	non-DE
ENSMUSG00000025083	0.343474	8.00341	8.02681	0.00460899	0.0273226	Afap1l2	19	-1	56912361	57008228	non-DE
ENSMUSG00000078676	0.343448	5.95785	7.04026	0.00796976	0.0394914	Casc3	11	1	98804905	98833814	non-DE
ENSMUSG00000035914	0.343395	2.62733	1.70425	0.191733	0.321038	Cd276	9	-1	58524298	58555437	non-DE
ENSMUSG00000028677	0.343392	6.20028	8.38565	0.00378196	0.023877	Rnf220	4	-1	117271463	117497052	non-DE
ENSMUSG00000038866	0.34338	4.66046	3.05487	0.0804952	0.177429	Zcchc2	1	1	105990406	106034074	non-DE
ENSMUSG00000038418	0.343346	1.24908	2.03047	0.154173	0.27446	Egr1	18	1	34859823	34864984	non-DE
ENSMUSG00000031906	0.343172	0.0723479	3.48465	0.0619406	0.149635	Smpd3	8	-1	106252548	106337988	non-DE
ENSMUSG00000031822	0.343046	5.28064	1.98188	0.159192	0.280781	Gse1	8	1	120228456	120581390	non-DE
ENSMUSG00000031862	0.343015	5.80492	5.34589	0.0207711	0.0730892	Atp13a1	8	1	69791163	69807749	non-DE
ENSMUSG00000035021	0.342977	3.47495	3.26381	0.0708244	0.163504	Baz1a	12	-1	54892989	55014348	non-DE
ENSMUSG00000102976	0.342907	3.0542	3.48713	0.0618478	0.149513	Zc3h11a	1	-1	133619862	133661380	non-DE
ENSMUSG00000037890	0.342774	2.7811	6.86087	0.00881039	0.0421646	Wdr19	5	1	65199696	65260415	non-DE
ENSMUSG00000026842	0.342758	6.00695	3.96826	0.0463657	0.123694	Abl1	2	1	31688376	31804227	non-DE
ENSMUSG00000066438	0.34266	4.64898	5.21254	0.0224245	0.0768346	Plekhd1	12	1	80692591	80724214	non-DE
ENSMUSG00000030551	0.342646	4.54034	6.54073	0.0105432	0.0474138	Nr2f2	7	-1	70351944	70366735	non-DE
ENSMUSG00000002250	0.34263	4.86412	5.07197	0.0243157	0.0811021	Ppard	17	1	28232700	28301474	non-DE
ENSMUSG00000032485	0.342467	6.31827	6.74203	0.00941672	0.0440819	Scap	9	1	110333288	110384950	non-DE
ENSMUSG00000048756	0.342411	5.40572	2.97883	0.0843604	0.183148	Foxo3	10	-1	42181841	42276755	non-DE
ENSMUSG00000022377	0.342251	5.90651	3.55922	0.0592155	0.145487	Asap1	15	-1	64086857	64382919	non-DE
ENSMUSG00000030691	0.342133	6.62116	10.4257	0.00124272	0.0116311	Fchsd2	7	1	101092863	101284405	non-DE
ENSMUSG00000026646	0.342132	2.01566	2.94727	0.0860229	0.185222	Suv39h2	2	-1	3455815	3475031	non-DE
ENSMUSG00000054889	0.34206	8.0454	3.67967	0.0550798	0.13849	Dsp	13	1	38151294	38198577	non-DE
ENSMUSG00000019979	0.342051	4.08701	5.44499	0.0196245	0.0703675	Apaf1	10	-1	90989311	91082770	non-DE
ENSMUSG00000037426	0.342	4.5679	5.49992	0.0190173	0.0691726	Depdc5	5	1	32863701	32994236	non-DE
ENSMUSG00000029246	0.341577	4.25949	9.27308	0.00232547	0.0173271	Ppat	5	-1	76913249	76951578	non-DE
ENSMUSG00000030275	0.341465	6.95824	4.60442	0.0318896	0.0970899	Etnk1	6	1	143167221	143232307	non-DE
ENSMUSG00000030835	0.341393	6.91097	3.70092	0.0543825	0.137237	Nomo1	7	1	46033698	46084212	non-DE
ENSMUSG00000004263	0.341344	1.00208	3.01513	0.0824909	0.180251	Atn1	6	-1	124742544	124756524	non-DE
ENSMUSG00000002257	0.341319	0.500322	4.05664	0.0439979	0.119657	Def6	17	1	28207778	28228608	non-DE
ENSMUSG00000041977	0.341287	6.40143	3.75111	0.0527725	0.134543	Arhgef11	3	1	87617559	87738034	non-DE
ENSMUSG00000032313	0.341104	0.751938	5.07558	0.0242652	0.0810291	Tmem266	9	1	55326913	55438345	non-DE
ENSMUSG00000046591	0.341034	2.38851	2.84193	0.091834	0.193578	Ticrr	7	1	79660196	79698148	non-DE
ENSMUSG00000058571	0.340974	2.21004	2.31592	0.128055	0.241825	Gpc6	14	1	116925315	117976544	non-DE
ENSMUSG00000082988	0.340949	1.75496	5.40234	0.0201097	0.0714553	Gm5903	7	-1	130352038	130354362	non-DE
ENSMUSG00000043279	0.34088	4.2116	3.53645	0.0600338	0.146591	Trim56	5	-1	137105644	137116209	non-DE
ENSMUSG00000079184	0.340817	4.98061	6.65858	0.00986797	0.0455257	Mphosph8	14	1	56668248	56697430	non-DE
ENSMUSG00000028826	0.340797	5.27775	7.5675	0.00594302	0.032177	Maco1	4	-1	134802759	134853345	non-DE
ENSMUSG00000020387	0.340725	2.66256	3.53634	0.0600379	0.146591	Jade2	11	-1	51813455	51857653	non-DE
ENSMUSG00000040820	0.3407	4.88098	4.69818	0.0301946	0.0936429	Hlcs	16	-1	94128882	94313571	non-DE
ENSMUSG00000021256	0.340492	1.41806	3.72825	0.0534995	0.135638	Vash1	12	1	86678700	86692091	non-DE
ENSMUSG00000027966	0.340383	0.127511	1.40947	0.235145	0.370975	Col11a1	3	1	114030540	114220718	non-DE
ENSMUSG00000032624	0.340362	6.08846	7.06095	0.0078782	0.0391887	Eml4	17	1	83350931	83480361	non-DE
ENSMUSG00000030315	0.340253	5.54298	9.88365	0.00166754	0.0140874	Vgll4	6	-1	114860628	114969994	non-DE
ENSMUSG00000024079	0.340206	4.77071	6.22415	0.0126019	0.0532703	Eif2ak2	17	-1	78852564	78882573	non-DE
ENSMUSG00000050931	0.340184	5.05171	6.31893	0.0119456	0.051473	Sgms2	3	-1	131318985	131491411	non-DE
ENSMUSG00000082195	0.339874	0.0414757	3.13808	0.076484	0.171648	Gm13034	4	1	146067752	146070928	non-DE
ENSMUSG00000021975	0.339756	4.18163	5.63685	0.0175868	0.0659463	Ints9	14	1	64950045	65039832	non-DE
ENSMUSG00000017478	0.339527	5.81417	5.73306	0.0166484	0.0635899	Zc3h18	8	1	122376609	122417360	non-DE
ENSMUSG00000044948	0.339525	5.51001	3.11529	0.0775607	0.173007	Cfap43	19	-1	47736857	47919287	non-DE
ENSMUSG00000017119	0.3395	7.02283	3.34554	0.0673872	0.158172	Nbr1	11	1	101552149	101581951	non-DE
ENSMUSG00000079598	0.339032	0.336845	2.52896	0.111774	0.220277	Clec2l	6	1	38663069	38680864	non-DE
ENSMUSG00000074364	0.339017	5.34188	6.03723	0.0140073	0.0570378	Ehd2	7	-1	15946958	15967567	non-DE
ENSMUSG00000037071	0.338978	5.51247	7.21417	0.00723304	0.0368582	Scd1	19	-1	44394455	44407879	non-DE
ENSMUSG00000032637	0.33887	6.31205	3.85858	0.0494923	0.12888	Atxn2l	7	-1	126491708	126503437	non-DE
ENSMUSG00000010554	0.338781	5.2425	12.1351	0.000494813	0.00632698	Mettl16	11	1	74770830	74828525	non-DE
ENSMUSG00000032440	0.338682	6.23326	6.98485	0.00822027	0.040379	Tgfbr2	9	-1	116084293	116175360	non-DE
ENSMUSG00000046138	0.33859	4.50758	3.51958	0.0606479	0.147622	9930021J03Rik	19	-1	29714402	29805989	non-DE
ENSMUSG00000038039	0.338584	4.5884	4.55421	0.0328378	0.0989965	Gcc2	10	1	58255497	58305599	non-DE
ENSMUSG00000005442	0.338577	5.09113	2.67613	0.101863	0.206947	Cic	7	1	25267704	25294159	non-DE
ENSMUSG00000039148	0.338562	5.2909	3.90699	0.0480857	0.126493	Sart1	19	-1	5377523	5388703	non-DE
ENSMUSG00000037379	0.338555	3.4337	8.53511	0.0034836	0.0225139	Spon2	5	-1	33198184	33218455	non-DE
ENSMUSG00000022488	0.338465	4.76029	9.75903	0.00178444	0.014749	Nckap1l	15	1	103453794	103498810	non-DE
ENSMUSG00000023923	0.338309	3.74766	3.49482	0.0615611	0.1491	Tbc1d5	17	-1	50733124	51179352	non-DE
ENSMUSG00000026430	0.33804	5.09932	6.37872	0.0115497	0.0503499	Rassf5	1	-1	131176410	131245258	non-DE
ENSMUSG00000032109	0.337937	3.57368	2.78499	0.0951515	0.198167	Nlrx1	9	-1	44252717	44268599	non-DE
ENSMUSG00000078671	0.337831	5.24094	3.53869	0.0599527	0.146484	Chd2	7	-1	73426638	73541830	non-DE
ENSMUSG00000004040	0.337626	6.10571	4.38319	0.0362949	0.105009	Stat3	11	-1	100885098	100939540	non-DE
ENSMUSG00000004846	0.337595	7.23459	2.66058	0.102863	0.208169	Plod3	5	1	136987019	136996648	non-DE
ENSMUSG00000040565	0.337595	5.60406	4.6307	0.0314048	0.0960897	Btaf1	19	1	36926079	37012752	non-DE
ENSMUSG00000034751	0.33757	3.56632	2.57125	0.108822	0.216541	Mast4	13	-1	102732486	103334497	non-DE
ENSMUSG00000065954	0.337515	6.0531	5.6554	0.0174017	0.0654895	Tacc1	8	-1	25154552	25256588	non-DE
ENSMUSG00000024413	0.33751	6.26752	2.68893	0.101048	0.205921	Npc1	18	-1	12189692	12236400	non-DE
ENSMUSG00000020790	0.337488	6.25038	6.04872	0.0139164	0.0567981	Ankfy1	11	1	72690006	72772146	non-DE
ENSMUSG00000042121	0.337304	5.43711	3.0813	0.0791972	0.17555	Ssh1	5	-1	113937094	113993894	non-DE
ENSMUSG00000033075	0.337296	5.08538	8.30193	0.0039603	0.0246617	Senp1	15	-1	98038744	98093744	non-DE
ENSMUSG00000028194	0.337281	3.59759	6.23843	0.0125008	0.0531047	Ddah1	3	1	145758675	145894277	non-DE
ENSMUSG00000062510	0.336978	1.72959	3.04243	0.0811145	0.178291	Nsl1	1	1	191063012	191086474	non-DE
ENSMUSG00000037331	0.33695	6.04758	2.67552	0.101902	0.206966	Larp1	11	1	58009064	58062034	non-DE
ENSMUSG00000033326	0.336834	5.46604	4.52387	0.0334251	0.100014	Kdm4a	4	-1	118136957	118180043	non-DE
ENSMUSG00000031133	0.336831	9.39748	5.92435	0.0149331	0.0595587	Arhgef6	X	-1	57231485	57338729	non-DE
ENSMUSG00000025579	0.336729	7.55325	2.06589	0.150627	0.270431	Gaa	11	1	119267887	119285454	non-DE
ENSMUSG00000049521	0.336652	4.03317	4.53707	0.0331684	0.0995051	Cdc42ep1	15	1	78842624	78850897	non-DE
ENSMUSG00000034422	0.336606	4.31755	2.98776	0.0838964	0.182435	Parp14	16	-1	35832874	35871544	non-DE
ENSMUSG00000042988	0.336597	1.6072	5.30448	0.0212706	0.0742188	Notum	11	-1	120653788	120661175	non-DE
ENSMUSG00000048826	0.336584	1.33975	4.95658	0.0259916	0.0845967	Dact2	17	-1	14195052	14204304	non-DE
ENSMUSG00000029684	0.336533	4.84737	6.35961	0.0116747	0.050692	Wasl	6	-1	24613805	24665009	non-DE
ENSMUSG00000026873	0.336514	3.12325	7.94462	0.00482306	0.0281501	Phf19	2	-1	34893757	34914026	non-DE
ENSMUSG00000022325	0.336486	2.65651	7.13312	0.00756728	0.0380824	Pop1	15	1	34495304	34530648	non-DE
ENSMUSG00000020883	0.33641	5.08031	9.96904	0.00159194	0.0136444	Fbxl20	11	-1	98082556	98150403	non-DE
ENSMUSG00000024134	0.336336	2.73849	4.45101	0.0348806	0.102767	Six2	17	-1	85684277	85688274	non-DE
ENSMUSG00000034903	0.336297	6.11584	4.90383	0.0267971	0.0861872	Cobll1	2	-1	65088339	65239403	non-DE
ENSMUSG00000026933	0.33606	4.3592	3.26377	0.0708263	0.163504	Camsap1	2	-1	25926838	25983282	non-DE
ENSMUSG00000020841	0.336052	6.62907	2.42354	0.119524	0.231015	Cpd	11	-1	76778424	76847018	non-DE
ENSMUSG00000005514	0.336038	7.07013	3.67391	0.0552705	0.138711	Por	5	1	135670033	135735326	non-DE
ENSMUSG00000040669	0.336018	5.2003	5.64665	0.0174887	0.0657038	Phc1	6	-1	122317731	122340561	non-DE
ENSMUSG00000031994	0.335933	0.704085	3.37428	0.0662215	0.156449	Adamts8	9	1	30942562	30963838	non-DE
ENSMUSG00000030213	0.33591	5.39013	3.35999	0.0667986	0.157366	Atf7ip	6	1	136506167	136610862	non-DE
ENSMUSG00000002455	0.335833	5.69729	5.36915	0.020496	0.0724272	Prpf6	2	1	181591868	181655660	non-DE
ENSMUSG00000031066	0.335825	3.62904	5.45421	0.0195212	0.0701929	Usp11	X	1	20703906	20720539	non-DE
ENSMUSG00000048170	0.335676	5.29762	11.3521	0.00075361	0.00840008	Mcmbp	7	-1	128696441	128740495	non-DE
ENSMUSG00000020661	0.335598	7.2242	3.0252	0.0819802	0.179663	Dnmt3a	12	1	3806007	3914443	non-DE
ENSMUSG00000074743	0.335543	7.59708	15.5466	8.04968e-05	0.00191325	Thbd	2	-1	148404466	148408188	non-DE
ENSMUSG00000034881	0.335486	1.53264	6.04365	0.0139564	0.0569121	Tbxa2r	10	1	81328731	81335172	non-DE
ENSMUSG00000028886	0.335336	5.7682	6.61604	0.0101064	0.0462318	Eya3	4	1	132638987	132724765	non-DE
ENSMUSG00000031659	0.335278	7.78738	5.2689	0.0217098	0.0751544	Adcy7	8	1	88272403	88329962	non-DE
ENSMUSG00000026469	0.335203	5.41076	5.10083	0.0239144	0.0802438	Xpr1	1	-1	155275701	155417415	non-DE
ENSMUSG00000021109	0.33512	7.26491	9.64054	0.00190329	0.0153282	Hif1a	12	1	73901375	73947530	non-DE
ENSMUSG00000024853	0.335055	6.71186	6.33168	0.01186	0.0512555	Sf3b2	19	-1	5273932	5295455	non-DE
ENSMUSG00000048616	0.334942	1.63465	2.95046	0.085853	0.184912	Nog	11	-1	89300638	89302332	non-DE
ENSMUSG00000086606	0.334921	3.54503	9.0412	0.00263962	0.0186928	Gm13205	4	-1	148947492	148948914	non-DE
ENSMUSG00000026471	0.334827	1.71825	4.83793	0.0278403	0.0883965	Mr1	1	-1	155127277	155146814	non-DE
ENSMUSG00000033809	0.334822	3.45536	4.1177	0.0424366	0.116736	Alg3	16	-1	20605374	20611735	non-DE
ENSMUSG00000031672	0.334801	6.71426	10.6664	0.00109098	0.0106651	Got2	8	-1	95864134	95888547	non-DE
ENSMUSG00000055932	0.334592	5.76526	6.56822	0.0103816	0.0470564	Fto	8	1	91313525	91668439	non-DE
ENSMUSG00000034022	0.334527	4.77453	5.00892	0.0252171	0.082877	Cpsf1	15	-1	76595803	76607591	non-DE
ENSMUSG00000027869	0.334333	2.29313	6.84483	0.00888982	0.0424729	Hsd3b6	3	-1	98805504	98814443	non-DE
ENSMUSG00000028108	0.334115	3.76672	3.0088	0.0828133	0.180649	Ecm1	3	-1	95734147	95739569	non-DE
ENSMUSG00000036667	0.334086	3.18997	5.04563	0.0246881	0.081919	Tcaf1	6	-1	42668002	42710088	non-DE
ENSMUSG00000018362	0.334001	5.31469	12.667	0.000372158	0.00520066	Kpna2	11	-1	106988629	106999541	non-DE
ENSMUSG00000032185	0.33388	6.00111	5.01792	0.0250863	0.0826268	Carm1	9	1	21546894	21592623	non-DE
ENSMUSG00000029505	0.333873	5.68655	2.86356	0.0906069	0.192004	Ep400	5	-1	110664373	110770717	non-DE
ENSMUSG00000079481	0.333863	1.99039	1.88859	0.169361	0.294305	Nhsl2	X	1	101849385	102092055	non-DE
ENSMUSG00000025790	0.333725	3.71941	2.50599	0.113414	0.222764	Slco3a1	7	-1	74275419	74554780	non-DE
ENSMUSG00000030847	0.333697	5.75344	5.47597	0.0192797	0.069692	Bag3	7	1	128523616	128546981	non-DE
ENSMUSG00000066543	0.33363	1.52833	0.157336	0.691622	0.78335	Rpl17-ps9	7	1	36118274	36118828	non-DE
ENSMUSG00000061533	0.333373	1.62921	5.46135	0.0194416	0.0700757	Cep128	12	-1	90998492	91384409	non-DE
ENSMUSG00000021359	0.333298	3.75686	5.89413	0.0151914	0.0602643	Tfap2a	13	-1	40715302	40738376	non-DE
ENSMUSG00000031731	0.333238	6.70749	7.01482	0.00808379	0.0398748	Ap1g1	8	1	109778554	109864204	non-DE
ENSMUSG00000025980	0.333105	7.87862	6.64176	0.00996157	0.0457837	Hspd1	1	-1	55077835	55088243	non-DE
ENSMUSG00000029361	0.333053	4.67153	2.03146	0.154072	0.274424	Nos1	5	1	117781032	117958840	non-DE
ENSMUSG00000018707	0.333013	7.1432	2.70794	0.0998501	0.204471	Dync1h1	12	1	110601452	110666945	non-DE
ENSMUSG00000031592	0.333011	5.38456	4.98885	0.0255111	0.0835134	Pcm1	8	1	41239752	41332344	non-DE
ENSMUSG00000037286	0.333004	6.87475	8.9945	0.00270794	0.019081	Stag1	9	1	100597798	100959375	non-DE
ENSMUSG00000040725	0.332919	6.23968	4.15157	0.0415959	0.114979	Hnrnpul1	7	-1	25721165	25754757	non-DE
ENSMUSG00000038014	0.3329	8.45521	7.89235	0.00496444	0.0287263	Fam120a	13	-1	48879219	48968017	non-DE
ENSMUSG00000032718	0.332777	1.94646	4.56954	0.0325452	0.098324	Mansc1	6	-1	134609207	134632488	non-DE
ENSMUSG00000020190	0.332729	6.73499	4.4399	0.0351082	0.103094	Mknk2	10	-1	80665327	80678112	non-DE
ENSMUSG00000026496	0.332613	5.65137	4.91861	0.026569	0.0858046	Parp1	1	1	180568924	180601254	non-DE
ENSMUSG00000038784	0.332563	4.19849	5.51979	0.0188025	0.0687982	Cnot4	6	-1	35022065	35133724	non-DE
ENSMUSG00000018765	0.332464	5.92929	4.55178	0.0328846	0.0990617	Fxr2	11	1	69632990	69653297	non-DE
ENSMUSG00000045659	0.332442	7.23428	5.14734	0.0232821	0.0786159	Plekha7	7	-1	116123485	116308376	non-DE
ENSMUSG00000031103	0.332393	3.48675	1.58356	0.208249	0.340306	Elf4	X	-1	48411046	48463132	non-DE
ENSMUSG00000087179	0.332383	0.814879	3.64103	0.0563719	0.140751	Gm14230	2	-1	156833049	156839892	non-DE
ENSMUSG00000022197	0.332218	5.18686	1.89835	0.168263	0.292907	Pdzd2	15	-1	12359711	12739924	non-DE
ENSMUSG00000009681	0.332172	5.80578	3.86819	0.0492095	0.128406	Bcr	10	1	75060592	75184921	non-DE
ENSMUSG00000005621	0.332147	5.14343	3.26431	0.0708028	0.163503	Zfp592	7	1	80993681	81045164	non-DE
ENSMUSG00000035325	0.332082	6.84603	4.09759	0.0429444	0.117652	Sec31a	5	-1	100361649	100416234	non-DE
ENSMUSG00000020682	0.332065	5.40393	2.64443	0.103913	0.209606	Mmp28	11	-1	83440768	83463071	non-DE
ENSMUSG00000001995	0.332054	6.16097	2.53247	0.111526	0.220118	Sipa1l2	8	-1	125418063	125569808	non-DE
ENSMUSG00000041852	0.331839	7.10758	9.37588	0.00219859	0.0168055	Tcf20	15	-1	82808436	82987872	non-DE
ENSMUSG00000039585	0.331683	4.48405	3.07615	0.0794481	0.175996	Myo9a	9	1	59750896	59928866	non-DE
ENSMUSG00000024579	0.331677	1.51433	5.85153	0.0155636	0.0610165	Pcyox1l	18	-1	61696837	61707635	non-DE
ENSMUSG00000023915	0.33113	5.54358	6.56171	0.0104196	0.0471684	Tnfrsf21	17	1	43016555	43089189	non-DE
ENSMUSG00000001052	0.331065	6.19279	4.66347	0.0308108	0.0948804	Sec24b	3	-1	129982759	130061553	non-DE
ENSMUSG00000040282	0.331029	4.1332	8.30755	0.00394807	0.0246265	BC052040	2	1	115581716	115778768	non-DE
ENSMUSG00000038170	0.330999	6.83948	3.29012	0.069698	0.161838	Pde4dip	3	-1	97689824	97888707	non-DE
ENSMUSG00000028517	0.330641	6.88931	7.56795	0.00594153	0.032177	Plpp3	4	1	105157347	105232764	non-DE
ENSMUSG00000105787	0.330627	0.237013	3.10995	0.0778152	0.173492	Gm8099	5	1	137928275	137929016	non-DE
ENSMUSG00000074527	0.330582	0.138847	0.996345	0.318196	0.456278	Gm14296	2	-1	176892509	176927809	non-DE
ENSMUSG00000025085	0.330552	4.99093	6.06036	0.0138249	0.0565064	Ablim1	19	-1	57032733	57314919	non-DE
ENSMUSG00000079259	0.33055	4.47535	4.96217	0.0259077	0.0844014	Trim71	9	-1	114507133	114564369	non-DE
ENSMUSG00000028838	0.330483	5.7413	9.50286	0.00205152	0.0160479	Extl1	4	-1	134356372	134383850	non-DE
ENSMUSG00000024331	0.330452	7.92801	10.3209	0.00131532	0.0120709	Dsc2	18	-1	20030633	20059554	non-DE
ENSMUSG00000030662	0.330179	5.46537	6.85995	0.00881492	0.0421721	Ipo5	14	1	120911224	120947999	non-DE
ENSMUSG00000022364	0.330126	1.9125	6.4181	0.0112963	0.0496155	Tbc1d31	15	1	57912199	57970067	non-DE
ENSMUSG00000025266	0.33004	5.16328	14.5392	0.000137271	0.00260926	Gnl3l	X	-1	150983141	151017322	non-DE
ENSMUSG00000042426	0.330006	4.31003	7.27286	0.00700042	0.0359223	Dhx29	13	1	112927454	112969432	non-DE
ENSMUSG00000039079	0.329904	2.34119	7.65472	0.00566239	0.0312559	Trhr2	8	-1	122356967	122360746	non-DE
ENSMUSG00000025262	0.329842	1.63099	3.49716	0.0614743	0.148992	Fam120c	X	1	151344175	151471842	non-DE
ENSMUSG00000033016	0.329792	2.89465	2.53779	0.11115	0.21966	Nfatc1	18	-1	80606205	80713071	non-DE
ENSMUSG00000033767	0.329778	4.24988	2.694	0.100726	0.205611	Tmem131l	3	-1	83897655	84040175	non-DE
ENSMUSG00000009569	0.329517	5.37011	2.86307	0.0906346	0.192004	Mrtfb	16	1	13256481	13417529	non-DE
ENSMUSG00000080935	0.329469	2.67536	6.58432	0.0102881	0.0467976	Got2-ps1	5	-1	138364260	138365552	non-DE
ENSMUSG00000038024	0.32941	5.46585	3.34111	0.0675691	0.158455	Dennd4c	4	1	86748555	86850603	non-DE
ENSMUSG00000013787	0.328926	6.55296	8.16194	0.00427785	0.025998	Ehmt2	17	1	34898469	34914052	non-DE
ENSMUSG00000040506	0.328864	5.18176	3.86683	0.0492494	0.128455	Ambra1	2	1	91730134	91918849	non-DE
ENSMUSG00000058922	0.328816	3.17933	8.47396	0.00360266	0.0230811	Gm10052	9	-1	123689233	123690192	non-DE
ENSMUSG00000092086	0.328801	4.55599	8.16484	0.00427102	0.0259773	Gm6793	8	-1	112013433	112015036	non-DE
ENSMUSG00000018412	0.328757	5.8927	5.87332	0.015372	0.0606421	Kansl1	11	-1	104333229	104468861	non-DE
ENSMUSG00000061393	0.328724	5.70407	4.24594	0.0393442	0.110712	Acvr2b	9	1	119402118	119434995	non-DE
ENSMUSG00000056476	0.328697	4.91951	4.03166	0.044654	0.120774	Med12l	3	1	59005825	59318682	non-DE
ENSMUSG00000036270	0.328593	5.47182	5.45006	0.0195677	0.0702655	Edc4	8	1	105880881	105894908	non-DE
ENSMUSG00000023972	0.328398	3.33274	4.60592	0.0318618	0.0970899	Ptk7	17	-1	46564471	46629504	non-DE
ENSMUSG00000001173	0.3283	3.24831	4.99068	0.0254842	0.0834985	Ocrl	X	1	47912387	47965868	non-DE
ENSMUSG00000052512	0.327943	3.86051	1.74088	0.187028	0.31525	Nav2	7	1	48908716	49610090	non-DE
ENSMUSG00000074221	0.327781	7.43959	5.51038	0.018904	0.0689714	Zfp568	7	1	29983955	30028282	non-DE
ENSMUSG00000043154	0.327737	6.945	4.02312	0.0448805	0.121117	Ppp2r3a	9	-1	101105084	101251795	non-DE
ENSMUSG00000043099	0.327696	5.30786	1.2696	0.259842	0.397306	Hic1	11	-1	75164565	75169519	non-DE
ENSMUSG00000031224	0.327663	0.162515	2.40551	0.120909	0.232604	Magee2	X	-1	104854952	104857267	non-DE
ENSMUSG00000078952	0.327643	2.36729	5.39649	0.0201773	0.0716593	Lncenc1	13	1	97434970	97497007	non-DE
ENSMUSG00000024598	0.327613	1.26949	1.3064	0.253047	0.390221	Fbn2	18	-1	58008623	58210487	non-DE
ENSMUSG00000034485	0.32743	7.5648	6.16581	0.0130243	0.0544134	Uaca	9	1	60794542	60880370	non-DE
ENSMUSG00000020681	0.327379	4.76391	2.55122	0.110209	0.218318	Ace	11	1	105967945	105989964	non-DE
ENSMUSG00000038764	0.327273	5.86463	7.73633	0.00541207	0.0303446	Ptpn3	4	-1	57190841	57301837	non-DE
ENSMUSG00000069114	0.327273	6.83243	4.73638	0.0295312	0.0923551	Zbtb10	3	1	9250602	9285333	non-DE
ENSMUSG00000029147	0.327124	5.9833	8.09424	0.00444061	0.026689	Ppm1g	5	-1	31202664	31220687	non-DE
ENSMUSG00000022641	0.327084	8.05393	5.21095	0.0224451	0.0768346	Bbx	16	-1	50191844	50432390	non-DE
ENSMUSG00000050965	0.326891	2.5719	4.57241	0.0324909	0.0982492	Prkca	11	-1	107933387	108343928	non-DE
ENSMUSG00000018583	0.326643	6.75759	14.5637	0.000135498	0.00258947	G3bp1	11	1	55469685	55504838	non-DE
ENSMUSG00000022442	0.326503	2.75465	8.90694	0.00284088	0.0196651	Ttll1	15	-1	83483769	83510893	non-DE
ENSMUSG00000084342	0.326462	0.125711	2.32139	0.127606	0.241225	Gm11224	4	-1	69954166	69955276	non-DE
ENSMUSG00000037795	0.326314	7.27457	7.12889	0.00758515	0.0381334	N4bp2	5	1	65763521	65830108	non-DE
ENSMUSG00000021908	0.326305	4.03724	7.08118	0.00778978	0.0388719	Gm6768	12	1	119260978	119262855	non-DE
ENSMUSG00000041949	0.326286	2.13535	5.56598	0.0183128	0.0676009	Tango6	8	1	106683068	106851439	non-DE
ENSMUSG00000034931	0.326277	5.43944	3.09308	0.0786258	0.174584	Dhx8	11	1	101732919	101767358	non-DE
ENSMUSG00000039801	0.326191	3.55228	4.26911	0.0388112	0.109729	Cplane1	15	1	8169106	8271158	non-DE
ENSMUSG00000034165	0.326146	5.87886	10.475	0.00121001	0.0114309	Ccnd3	17	1	47505051	47599691	non-DE
ENSMUSG00000032035	0.326138	4.6407	7.36713	0.00664268	0.0346262	Ets1	9	1	32636221	32757820	non-DE
ENSMUSG00000029480	0.325985	3.9755	3.49411	0.0615874	0.149138	Dhx37	5	-1	125413858	125434121	non-DE
ENSMUSG00000031574	0.325855	5.24435	3.12571	0.0770664	0.172431	Star	8	1	25806555	25815982	non-DE
ENSMUSG00000036473	0.325591	5.21211	6.57024	0.0103698	0.0470564	Tbc1d24	17	-1	24175431	24205562	non-DE
ENSMUSG00000024999	0.325425	3.99845	8.52714	0.00349889	0.0225851	Noc3l	19	-1	38788128	38819237	non-DE
ENSMUSG00000004897	0.32532	7.23415	11.8016	0.000591788	0.00717462	Hdgf	3	1	87906321	87916132	non-DE
ENSMUSG00000024985	0.325301	3.57214	5.31258	0.021172	0.0740392	Tcf7l2	19	1	55741820	55933654	non-DE
ENSMUSG00000017670	0.325249	5.68103	7.99502	0.00469061	0.0276164	Elmo2	2	-1	165288031	165326479	non-DE
ENSMUSG00000095440	0.325187	6.05167	6.13973	0.0132178	0.0549621	Fignl2	15	-1	101050194	101078567	non-DE
ENSMUSG00000035085	0.325084	2.90465	2.47294	0.115821	0.225798	1700020L24Rik	11	1	83437677	83441233	non-DE
ENSMUSG00000029826	0.32481	6.47248	7.40017	0.00652176	0.0342483	Zc3hav1	6	-1	38305286	38354603	non-DE
ENSMUSG00000023963	0.324705	1.44157	6.60658	0.0101602	0.0463953	Cyp39a1	17	1	43667425	43751431	non-DE
ENSMUSG00000045180	0.324649	4.6766	5.23524	0.0221337	0.0761779	Shroom2	X	-1	152609509	152769465	non-DE
ENSMUSG00000023994	0.324645	6.03042	9.10776	0.00254527	0.0182717	Nfya	17	-1	48386885	48409906	non-DE
ENSMUSG00000051344	0.324586	3.06836	3.01426	0.0825351	0.180292	Plekhm3	1	-1	64785983	64956824	non-DE
ENSMUSG00000024486	0.324564	6.04486	9.06272	0.00260874	0.0185127	Hbegf	18	-1	36504927	36515805	non-DE
ENSMUSG00000036968	0.324555	4.79196	11.72	0.000618323	0.00739165	Cnpy4	5	1	138187485	138193918	non-DE
ENSMUSG00000037344	0.3245	4.46558	7.56362	0.00595581	0.0322215	Slc12a9	5	-1	137314558	137333597	non-DE
ENSMUSG00000035392	0.324318	5.67199	4.43167	0.0352781	0.103292	Dennd1a	2	-1	37798991	38287390	non-DE
ENSMUSG00000034621	0.324167	4.95244	5.38302	0.0203337	0.0720698	Gpatch8	11	-1	102475915	102556392	non-DE
ENSMUSG00000028978	0.324099	1.36109	3.41217	0.0647172	0.154183	Nos3	5	1	24364810	24384474	non-DE
ENSMUSG00000071745	0.323999	1.4251	6.0964	0.0135458	0.0558822	DXBay18	X	-1	73137232	73149450	non-DE
ENSMUSG00000001138	0.323906	4.80142	5.45592	0.0195022	0.0701715	Cnnm3	1	1	36511867	36528237	non-DE
ENSMUSG00000042492	0.323889	6.9457	4.69874	0.0301848	0.0936409	Tbc1d10b	7	-1	127197459	127208468	non-DE
ENSMUSG00000028655	0.323885	7.35456	10.0578	0.00151707	0.0132927	Mfsd2a	4	-1	122946850	122961188	non-DE
ENSMUSG00000028693	0.323757	5.48115	11.4316	0.000722041	0.00816432	Nasp	4	-1	116601052	116627941	non-DE
ENSMUSG00000031523	0.323715	6.51793	3.95325	0.0467808	0.124344	Dlc1	8	-1	36567751	36953143	non-DE
ENSMUSG00000034981	0.323444	7.70449	4.96472	0.0258695	0.0843158	Parm1	5	1	91517615	91626894	non-DE
ENSMUSG00000048442	0.323404	1.71372	1.00467	0.316182	0.454495	Smim5	11	1	115899966	115906269	non-DE
ENSMUSG00000005672	0.323381	6.79918	4.12056	0.042365	0.116584	Kit	5	1	75574916	75656722	non-DE
ENSMUSG00000096929	0.323224	1.90477	1.49502	0.221439	0.355337	A330023F24Rik	1	1	194976375	195037904	non-DE
ENSMUSG00000024056	0.323147	3.03381	5.33737	0.020873	0.0733017	Ndc80	17	-1	71496100	71526857	non-DE
ENSMUSG00000020429	0.323109	0.628741	1.43507	0.230939	0.36606	Igfbp1	11	1	7197782	7202546	non-DE
ENSMUSG00000020262	0.323035	4.65865	5.00188	0.0253198	0.0831179	Adarb1	10	-1	77290726	77418270	non-DE
ENSMUSG00000025647	0.322958	7.95476	7.33368	0.00676742	0.035121	Shisa5	9	1	109038565	109057777	non-DE
ENSMUSG00000046556	0.322874	4.67189	3.52191	0.0605627	0.14749	Zfp319	8	-1	95323011	95331950	non-DE
ENSMUSG00000045005	0.322822	5.20194	4.40632	0.0358061	0.104084	Fzd5	1	-1	64730558	64737751	non-DE
ENSMUSG00000028402	0.322591	3.83692	3.10843	0.077888	0.173627	Mpdz	4	-1	81278500	81442815	non-DE
ENSMUSG00000037487	0.322509	7.07381	2.26031	0.132727	0.247793	Ubr5	15	-1	37967328	38078854	non-DE
ENSMUSG00000000282	0.322485	5.34189	3.22123	0.0726888	0.165988	Mnt	11	1	74830920	74845725	non-DE
ENSMUSG00000041215	0.322482	4.91422	6.3263	0.011896	0.0513376	Yeats2	16	1	20141063	20232573	non-DE
ENSMUSG00000055675	0.322251	1.06618	3.2034	0.0734851	0.167132	Kbtbd11	8	1	15011025	15033333	non-DE
ENSMUSG00000031639	0.322144	3.09742	6.68554	0.00971981	0.0450238	Tlr3	8	-1	45395665	45411080	non-DE
ENSMUSG00000084891	0.321956	0.110214	0.636223	0.425082	0.560044	Gm12958	4	1	128637471	128638447	non-DE
ENSMUSG00000058761	0.321955	3.17788	2.48389	0.115018	0.224666	Rnf169	7	-1	99920254	99980448	non-DE
ENSMUSG00000028521	0.321932	4.89352	11.4639	0.000709605	0.00811256	Slc35d1	4	-1	103170649	103215164	non-DE
ENSMUSG00000030605	0.321867	8.71934	6.92678	0.00849142	0.0412297	Mfge8	7	-1	79133768	79149060	non-DE
ENSMUSG00000027306	0.321735	3.23968	5.70986	0.0168699	0.0641846	Nusap1	2	1	119618298	119651244	non-DE
ENSMUSG00000032480	0.321644	5.65322	4.53528	0.033203	0.0995877	Dhx30	9	-1	110084320	110117830	non-DE
ENSMUSG00000027358	0.321618	1.94715	4.58815	0.0321938	0.0976796	Bmp2	2	1	133552159	133562885	non-DE
ENSMUSG00000039126	0.321484	4.06883	1.66533	0.196885	0.327189	Prune2	19	1	16956118	17223932	non-DE
ENSMUSG00000047143	0.321436	0.714497	1.52511	0.216848	0.350156	Dmrta2	4	1	109978053	109983687	non-DE
ENSMUSG00000063077	0.32143	5.53231	4.00552	0.0453516	0.122002	Kif1b	4	-1	149176319	149307693	non-DE
ENSMUSG00000024622	0.321349	5.36619	3.54332	0.0597858	0.146176	Hmgxb3	18	-1	61131277	61177050	non-DE
ENSMUSG00000066607	0.321335	1.86199	0.86554	0.352193	0.489938	Insyn1	9	1	58488603	58499780	non-DE
ENSMUSG00000037533	0.321209	5.13646	6.04613	0.0139368	0.0568488	Rapgef6	11	1	54522847	54699285	non-DE
ENSMUSG00000021843	0.321089	6.66732	6.21586	0.0126611	0.0534169	Ktn1	14	1	47648448	47739894	non-DE
ENSMUSG00000023110	0.321003	5.67236	15.1845	9.74982e-05	0.00214102	Prmt5	14	-1	54507187	54517525	non-DE
ENSMUSG00000000792	0.321003	4.35137	5.22279	0.0222927	0.0765575	Slc5a5	8	-1	70882889	70892757	non-DE
ENSMUSG00000040380	0.320958	1.75899	5.63054	0.0176501	0.0660864	Cbln3	14	-1	55878913	55884392	non-DE
ENSMUSG00000020538	0.320945	6.27321	2.61343	0.105963	0.212647	Srebf1	11	-1	60199089	60222581	non-DE
ENSMUSG00000051427	0.320875	3.07046	4.40958	0.0357377	0.103971	Ccdc157	11	-1	4141123	4160293	non-DE
ENSMUSG00000024491	0.32082	5.58021	5.86853	0.0154139	0.0606859	Rbm27	18	1	42275353	42341542	non-DE
ENSMUSG00000019831	0.320635	3.66197	6.33511	0.0118371	0.0511928	Wasf1	10	1	40883475	40938570	non-DE
ENSMUSG00000029250	0.320481	5.98102	5.4829	0.0192033	0.0695273	Polr2b	5	1	77310147	77349324	non-DE
ENSMUSG00000026490	0.320474	5.7863	2.96815	0.0849191	0.183825	Cdc42bpa	1	1	179960472	180165603	non-DE
ENSMUSG00000039318	0.32043	5.23793	3.15298	0.0757884	0.170536	Rab3gap2	1	1	185204117	185286759	non-DE
ENSMUSG00000051495	0.320426	4.38726	4.23185	0.0396721	0.111318	Irf2bp2	8	-1	126588296	126593986	non-DE
ENSMUSG00000041187	0.320393	4.26548	12.5334	0.000399737	0.00546191	Prkd2	7	1	16842902	16870464	non-DE
ENSMUSG00000021466	0.320388	4.08167	3.56458	0.0590247	0.145145	Ptch1	13	-1	63508328	63573598	non-DE
ENSMUSG00000029512	0.320363	5.59185	3.91292	0.0479163	0.126235	Ulk1	5	-1	110784488	110810097	non-DE
ENSMUSG00000021553	0.320192	4.26643	3.95774	0.0466562	0.124163	Slc28a3	13	-1	58545399	58610877	non-DE
ENSMUSG00000027580	0.32018	3.63988	3.20706	0.0733211	0.166839	Helz2	2	-1	181227615	181242027	non-DE
ENSMUSG00000035062	0.320152	1.40077	2.75359	0.0970361	0.200656	Zc4h2	X	-1	95639193	95658509	non-DE
ENSMUSG00000019907	0.320104	5.59449	4.28643	0.0384177	0.109031	Ppp1r12a	10	1	108162193	108284475	non-DE
ENSMUSG00000031283	0.320043	4.33387	4.43941	0.0351183	0.103102	Chrdl1	X	-1	143285674	143394262	non-DE
ENSMUSG00000046201	0.319975	5.97694	6.82635	0.00898227	0.0427845	Scaf8	17	1	3114972	3198859	non-DE
ENSMUSG00000006585	0.319952	4.12132	7.02523	0.00803691	0.0396989	Cdt1	8	1	122568015	122573554	non-DE
ENSMUSG00000047193	0.319844	3.00711	3.05372	0.0805525	0.177518	Dync2h1	9	-1	6928503	7184446	non-DE
ENSMUSG00000025194	0.319816	1.89072	3.39668	0.0653278	0.155115	Abcc2	19	1	43782192	43840740	non-DE
ENSMUSG00000048661	0.31978	5.07839	6.54229	0.010534	0.0474083	Lemd3	10	-1	120923413	120979332	non-DE
ENSMUSG00000024118	0.319691	5.09065	5.73283	0.0166506	0.0635899	Tedc2	17	-1	24215054	24220851	non-DE
ENSMUSG00000048874	0.319642	6.26865	5.21225	0.0224283	0.0768346	Phf3	1	-1	30802339	30873921	non-DE
ENSMUSG00000031715	0.319635	6.09984	8.15125	0.00430314	0.0260956	Smarca5	8	-1	80698507	80739497	non-DE
ENSMUSG00000036098	0.319361	1.25183	2.13861	0.143632	0.261791	Myrf	19	-1	10208272	10240748	non-DE
ENSMUSG00000026192	0.319243	5.25926	7.47567	0.00625384	0.0333114	Atic	1	1	71557150	71579631	non-DE
ENSMUSG00000017830	0.31915	1.65983	6.83094	0.0089592	0.0427117	Dhx58	11	-1	100694884	100704271	non-DE
[truncated: 12,237 more rows]

## Sheet: matdel_E14.5pl_Zp3_totDE
Supplementary file 2c. Differential expression (non-split counts) in male E14.5 B6Cast embryonic placentae, Smchd1 matΔ vs wt (Zp3-Cre). A gene is called differentially expressed if the q-value is below 0.05 and the fold change is greater than 2.
[truncated: 14,262 more rows]

[truncated: 2 more sheets: patdel_E14.5pl_male_DE_results, matdel_E2.75e_DE_results]
