# Supplementary material for: Smchd1 is a maternal effect gene required for genomic imprinting
Source: eLife. 2020 Nov 13;9:e55529. doi: 10.7554/eLife.55529 (PMC7665889; doi:10.7554/eLife.55529)
Supplement: Supplementary file 3. — (a) Differential imprinted methylation in E14.5 B6Cast male placentae, Smchd1 matΔ versus wt. A methylated allele is called differentially methylated if the multiple-testing corrected p-value is below 0.05. (b) Differential imprinted methylation in E2.75 B6Cast male embryos, Smchd1 matΔ versus wt. A methylated allele is called differentially methylated if the multiple-testing corrected p-value is below 0.05. (c) Differential imprinted methylation in E2.75 B6Cast male embryos, Smchd1 matΔ versus wt. A methylated allele is called differentially methylated if the multiple-testing corrected p-value is below 0.05. [file elife-55529-supp3.xlsx]

## Sheet: E14.5_mat_RRBS_methallele
Supplementary file 3a. Differential imprinted methylation in E14.5 B6Cast male placentae, Smchd1 matΔ vs wt. A methylated allele is called differentially methylated if the multiple-testing corrected p-value is below 0.05.
name	chr	start	end	meth_allele	primary	nearest_gene	testable	oo_minus_wt	padj	diff_imprinted
JADE1	3	41555359	41556940	m	FALSE	Jade1	TRUE	-0.454376	1.5092e-10	TRUE
CD81	7	143052956	143053090	p	FALSE	Cd81,R74862	TRUE	-0.132415	0.680652	FALSE
IGF2R/AIR	17	12741160	12742949	m	TRUE	Igf2r,Airn	TRUE	0.0640432	0.680652	FALSE
GPR1-ZDBF2	1	63257407	63264876	p	FALSE	Zdbf2,Gpr1	TRUE	0.00994832	0.995511	FALSE
GPR1-PLATR12/LIZ	1	63200250	63200470	m	TRUE	Zdbf2,Gpr1	TRUE	0.107382	0.995511	FALSE
SFMBT2	2	10371327	10371731	m	FALSE	Sfmbt2,Gm13261	TRUE	0.0218801	0.995511	FALSE
MCTS2	2	152686261	152687856	m	TRUE	Mcts2	TRUE	0.0298337	0.995511	FALSE
NESP	2	174283034	174287439	p	TRUE	Nespas	TRUE	-0.013963	0.995511	FALSE
NESPAS	2	174294696	174300693	m	TRUE	Gnas	TRUE	0.0211735	0.995511	FALSE
MEST	6	30735330	30739552	m	TRUE	Mest	TRUE	-0.0159578	0.995511	FALSE
ZIM2	7	6727344	6732116	m	TRUE	Peg3	TRUE	-0.0121526	0.995511	FALSE
SNURF/SNRPN	7	60003140	60005415	m	TRUE	Snrpn,Snurf	TRUE	-0.028991	0.995511	FALSE
INPP5F_V2	7	128688274	128688642	m	TRUE	Inpp5f	TRUE	-0.0204945	0.995511	FALSE
H19/IGF2	7	142575503	142582140	p	FALSE	H19	TRUE	0.0137276	0.995511	FALSE
IGF2-DMR0	7	142669246	142670067	m	FALSE	Igf2,Igf2os,Gm49394	TRUE	-0.0121717	0.995511	FALSE
KCNQ1OT1	7	143294879	143296757	m	TRUE	Kcnq1ot1	TRUE	-0.000466427	0.995511	FALSE
KCNQ1-INTERGENIC1	7	143438058	143438341	p	FALSE	NA	TRUE	-0.0655136	0.995511	FALSE
KCNQ1-INTERGENIC2	7	143445526	143445944	p	FALSE	Gm27901	TRUE	0.00921055	0.995511	FALSE
ZAC1	10	13090313	13092161	m	TRUE	Plagl1	TRUE	0.00010041	0.995511	FALSE
U2AF1-RS1	11	22971545	22973999	m	TRUE	Zrsr1	TRUE	-0.024237	0.995511	FALSE
GRB10	11	12025482	12026332	m	TRUE	Grb10	TRUE	0.00326651	0.995511	FALSE
MEG3	12	109540792	109541676	p	FALSE	Meg3,Mir1906-1,Gm27300,Gm27596	TRUE	0.0574074	0.995511	FALSE
PEG13	15	72806335	72811649	m	TRUE	Peg13	TRUE	0.00242527	0.995511	FALSE
AC158554.1	15	97166956	97167257	m	FALSE	AC158554.1	TRUE	-0.0465677	0.995511	FALSE
SLC22A2	17	12607783	12608088	m	FALSE	Slc22a2	TRUE	0.0580808	0.995511	FALSE
IGF2R-TSS	17	12769605	12770120	p	FALSE	Igf2r,Airn,Gm23833	TRUE	-0.096149	0.995511	FALSE
IMPACT	18	12972182	12974748	m	TRUE	Impact	TRUE	0.0338551	0.995511	FALSE
NNAT	2	157559825	157561802	m	TRUE	Nnat	FALSE	NA	NA	NA
GNAS-EXON1A	2	174326930	174329007	m	TRUE	Gnas	FALSE	NA	NA	NA
PEG10	6	4746012	4749480	m	TRUE	Peg10	FALSE	NA	NA	NA
NAP1L5	6	58906696	58907095	m	TRUE	Nap1l5,Herc3	FALSE	NA	NA	NA
NDN	7	62348214	62348695	m	TRUE	Ndn	FALSE	NA	NA	NA
PEG12	7	62463291	62464790	m	FALSE	Peg12	FALSE	NA	NA	NA
ASCL2	7	142968946	142969300	p	FALSE	Ascl2	FALSE	NA	NA	NA
TSSC4	7	143068896	143069197	p	TRUE	Tssc4,Trpm5,Cd81	FALSE	NA	NA	NA
CDKN1C	7	143459775	143459891	p	FALSE	Cdkn1c,Gm4732	FALSE	NA	NA	NA
GAB1	8	80859569	80859745	m	FALSE	Gab1	FALSE	NA	NA	NA
RASGRF1	9	89879568	89880045	p	TRUE	Rasgrf	FALSE	NA	NA	NA
GTL2/DLK1	12	109526740	109528845	p	TRUE	Gm27528,Gm27528	FALSE	NA	NA	NA
MEG3-INTRON	12	109556071	109556162	m	FALSE	Meg3	FALSE	NA	NA	NA
RIAN	12	109612804	109612962	m	FALSE	Rian,Mir1188,Mir341	FALSE	NA	NA	NA
SLC38A4	15	97053880	97056427	m	FALSE	Slc38a4	FALSE	NA	NA	NA
PDE10A	17	8772760	8773118	m	FALSE	Pde10a	FALSE	NA	NA	NA
PARK2	17	11123807	11124219	m	FALSE	Park2	FALSE	NA	NA	NA
SMOC2-INTERGENIC	17	14590437	14590640	m	FALSE	Smoc2, Thbs2	FALSE	NA	NA	NA

## Sheet: E2.75_mat_WGBS_methallele
Supplementary file 3b. Differential imprinted methylation in E2.75 B6Cast male emybryos, Smchd1 matΔ vs wt. A methylated allele is called differentially methylated if the multiple-testing corrected p-value is below 0.05.
name	chr	start	end	meth_allele	primary	nearest_gene	testable	oo_minus_wt	padj	diff_imprinted
GNAS-EXON1A	2	174326930	174329007	m	TRUE	Gnas	TRUE	-0.266916	0.442282	FALSE
U2AF1-RS1	11	22971545	22973999	m	TRUE	Zrsr1	TRUE	0.116653	0.442282	FALSE
ZAC1	10	13090313	13092161	m	TRUE	Plagl1	TRUE	0.0957583	0.49851	FALSE
GRB10	11	12025482	12026332	m	TRUE	Grb10	TRUE	0.105303	0.749332	FALSE
SLC38A4	15	97053880	97056427	m	FALSE	Slc38a4	TRUE	0.0666018	0.749332	FALSE
GPR1-PLATR12/LIZ	1	63200250	63200470	m	TRUE	Zdbf2,Gpr1	TRUE	-0.0488095	0.902112	FALSE
PEG10	6	4746012	4749480	m	TRUE	Peg10	TRUE	0.191058	0.902112	FALSE
SNURF/SNRPN	7	60003140	60005415	m	TRUE	Snrpn,Snurf	TRUE	-0.0663339	0.902112	FALSE
IGF2-DMR0	7	142669246	142670067	m	FALSE	Igf2,Igf2os,Gm49394	TRUE	-0.226455	0.902112	FALSE
RASGRF1	9	89879568	89880045	p	TRUE	Rasgrf	TRUE	0.0920273	0.902112	FALSE
H19/IGF2	7	142575503	142582140	p	FALSE	H19	TRUE	0.0458291	0.97205	FALSE
KCNQ1OT1	7	143294879	143296757	m	TRUE	Kcnq1ot1	TRUE	-0.0457434	0.97205	FALSE
GTL2/DLK1	12	109526740	109528845	p	TRUE	Gm27528,Gm27528	TRUE	0.0209961	0.97205	FALSE
PEG13	15	72806335	72811649	m	TRUE	Peg13	TRUE	-0.0593947	0.97205	FALSE
MCTS2	2	152686261	152687856	m	TRUE	Mcts2	TRUE	-0.00489384	0.994496	FALSE
NESPAS	2	174294696	174300693	m	TRUE	Gnas	TRUE	0.0188399	0.994496	FALSE
MEST	6	30735330	30739552	m	TRUE	Mest	TRUE	-0.0268756	0.994496	FALSE
ZIM2	7	6727344	6732116	m	TRUE	Peg3	TRUE	-0.0354652	0.994496	FALSE
INPP5F_V2	7	128688274	128688642	m	TRUE	Inpp5f	TRUE	0.0155844	0.994496	FALSE
IGF2R/AIR	17	12741160	12742949	m	TRUE	Igf2r,Airn	TRUE	-0.0470342	0.994496	FALSE
IMPACT	18	12972182	12974748	m	TRUE	Impact	TRUE	0.0288186	0.994496	FALSE
NESP	2	174283034	174287439	p	TRUE	Nespas	TRUE	0.00322167	NA	FALSE
JADE1	3	41555359	41556940	m	FALSE	Jade1	TRUE	-0.0558579	NA	FALSE
NDN	7	62348214	62348695	m	TRUE	Ndn	TRUE	-0.0205108	NA	FALSE
PEG12	7	62463291	62464790	m	FALSE	Peg12	TRUE	-0.00402184	NA	FALSE
CD81	7	143052956	143053090	p	FALSE	Cd81,R74862	TRUE	0	NA	FALSE
TSSC4	7	143068896	143069197	p	TRUE	Tssc4,Trpm5,Cd81	TRUE	0	NA	FALSE
KCNQ1-INTERGENIC2	7	143445526	143445944	p	FALSE	Gm27901	TRUE	0	NA	FALSE
GAB1	8	80859569	80859745	m	FALSE	Gab1	TRUE	0	NA	FALSE
MEG3	12	109540792	109541676	p	FALSE	Meg3,Mir1906-1,Gm27300,Gm27596	TRUE	0	NA	FALSE
MEG3-INTRON	12	109556071	109556162	m	FALSE	Meg3	TRUE	-0.0833333	NA	FALSE
AC158554.1	15	97166956	97167257	m	FALSE	AC158554.1	TRUE	0	NA	FALSE
IGF2R-TSS	17	12769605	12770120	p	FALSE	Igf2r,Airn,Gm23833	TRUE	-0.0145998	NA	FALSE
SMOC2-INTERGENIC	17	14590437	14590640	m	FALSE	Smoc2, Thbs2	TRUE	0	NA	FALSE
GPR1-ZDBF2	1	63257407	63264876	p	FALSE	Zdbf2,Gpr1	TRUE	0.125717	NA	NA
SFMBT2	2	10371327	10371731	m	FALSE	Sfmbt2,Gm13261	TRUE	-0.146429	NA	NA
NNAT	2	157559825	157561802	m	TRUE	Nnat	TRUE	NA	NA	NA
NAP1L5	6	58906696	58907095	m	TRUE	Nap1l5,Herc3	TRUE	NA	NA	NA
ASCL2	7	142968946	142969300	p	FALSE	Ascl2	TRUE	-0.333333	NA	NA
KCNQ1-INTERGENIC1	7	143438058	143438341	p	FALSE	NA	TRUE	NA	NA	NA
CDKN1C	7	143459775	143459891	p	FALSE	Cdkn1c,Gm4732	TRUE	NA	NA	NA
RIAN	12	109612804	109612962	m	FALSE	Rian,Mir1188,Mir341	TRUE	0.318182	NA	NA
PDE10A	17	8772760	8773118	m	FALSE	Pde10a	TRUE	0.515385	NA	NA
PARK2	17	11123807	11124219	m	FALSE	Park2	TRUE	0.666667	NA	NA
SLC22A2	17	12607783	12608088	m	FALSE	Slc22a2	TRUE	NA	NA	NA

## Sheet: E2.75_mat_WGBS_mixedalleles
Supplementary file 3c. Differential imprinted methylation in E2.75 B6Cast male emybryos, Smchd1 matΔ vs wt. A methylated allele is called differentially methylated if the multiple-testing corrected p-value is below 0.05.
name	chr	start	end	meth_allele	primary	nearest_gene	testable	oo_minus_wt	padj	diff_imprinted
INPP5F_V2	7	128688274	128688642	m	TRUE	Inpp5f	TRUE	-0.329042	0.0974007	FALSE
GNAS-EXON1A	2	174326930	174329007	m	TRUE	Gnas	TRUE	-0.102942	0.981551	FALSE
PEG10	6	4746012	4749480	m	TRUE	Peg10	TRUE	-0.131656	0.981551	FALSE
GRB10	11	12025482	12026332	m	TRUE	Grb10	TRUE	0.12297	0.981551	FALSE
GPR1-PLATR12/LIZ	1	63200250	63200470	m	TRUE	Zdbf2,Gpr1	TRUE	0.119588	0.999334	FALSE
MCTS2	2	152686261	152687856	m	TRUE	Mcts2	TRUE	-0.0337277	0.999334	FALSE
NESPAS	2	174294696	174300693	m	TRUE	Gnas	TRUE	-0.0214371	0.999334	FALSE
MEST	6	30735330	30739552	m	TRUE	Mest	TRUE	0.0275911	0.999334	FALSE
ZIM2	7	6727344	6732116	m	TRUE	Peg3	TRUE	-0.000193312	0.999334	FALSE
SNURF/SNRPN	7	60003140	60005415	m	TRUE	Snrpn,Snurf	TRUE	0.0367418	0.999334	FALSE
H19/IGF2	7	142575503	142582140	p	FALSE	H19	TRUE	-0.0306092	0.999334	FALSE
IGF2-DMR0	7	142669246	142670067	m	FALSE	Igf2,Igf2os,Gm49394	TRUE	-0.0887462	0.999334	FALSE
KCNQ1OT1	7	143294879	143296757	m	TRUE	Kcnq1ot1	TRUE	0.0280714	0.999334	FALSE
RASGRF1	9	89879568	89880045	p	TRUE	Rasgrf	TRUE	0.0680766	0.999334	FALSE
ZAC1	10	13090313	13092161	m	TRUE	Plagl1	TRUE	0.0389388	0.999334	FALSE
U2AF1-RS1	11	22971545	22973999	m	TRUE	Zrsr1	TRUE	-0.00334384	0.999334	FALSE
GTL2/DLK1	12	109526740	109528845	p	TRUE	Gm27528,Gm27528	TRUE	-0.104298	0.999334	FALSE
PEG13	15	72806335	72811649	m	TRUE	Peg13	TRUE	-0.105162	0.999334	FALSE
SLC38A4	15	97053880	97056427	m	FALSE	Slc38a4	TRUE	0.0207827	0.999334	FALSE
IGF2R/AIR	17	12741160	12742949	m	TRUE	Igf2r,Airn	TRUE	0.0174824	0.999334	FALSE
IMPACT	18	12972182	12974748	m	TRUE	Impact	TRUE	-0.00185643	0.999334	FALSE
GPR1-ZDBF2	1	63257407	63264876	p	FALSE	Zdbf2,Gpr1	FALSE	NA	NA	NA
SFMBT2	2	10371327	10371731	m	FALSE	Sfmbt2,Gm13261	FALSE	NA	NA	NA
NNAT	2	157559825	157561802	m	TRUE	Nnat	FALSE	NA	NA	NA
NESP	2	174283034	174287439	p	TRUE	Nespas	FALSE	NA	NA	NA
JADE1	3	41555359	41556940	m	FALSE	Jade1	FALSE	NA	NA	NA
NAP1L5	6	58906696	58907095	m	TRUE	Nap1l5,Herc3	FALSE	NA	NA	NA
NDN	7	62348214	62348695	m	TRUE	Ndn	FALSE	NA	NA	NA
PEG12	7	62463291	62464790	m	FALSE	Peg12	FALSE	NA	NA	NA
ASCL2	7	142968946	142969300	p	FALSE	Ascl2	FALSE	NA	NA	NA
CD81	7	143052956	143053090	p	FALSE	Cd81,R74862	FALSE	NA	NA	NA
TSSC4	7	143068896	143069197	p	TRUE	Tssc4,Trpm5,Cd81	FALSE	NA	NA	NA
KCNQ1-INTERGENIC1	7	143438058	143438341	p	FALSE	NA	FALSE	NA	NA	NA
KCNQ1-INTERGENIC2	7	143445526	143445944	p	FALSE	Gm27901	FALSE	NA	NA	NA
CDKN1C	7	143459775	143459891	p	FALSE	Cdkn1c,Gm4732	FALSE	NA	NA	NA
GAB1	8	80859569	80859745	m	FALSE	Gab1	FALSE	NA	NA	NA
MEG3	12	109540792	109541676	p	FALSE	Meg3,Mir1906-1,Gm27300,Gm27596	FALSE	NA	NA	NA
MEG3-INTRON	12	109556071	109556162	m	FALSE	Meg3	FALSE	NA	NA	NA
RIAN	12	109612804	109612962	m	FALSE	Rian,Mir1188,Mir341	FALSE	NA	NA	NA
AC158554.1	15	97166956	97167257	m	FALSE	AC158554.1	FALSE	NA	NA	NA
PDE10A	17	8772760	8773118	m	FALSE	Pde10a	FALSE	NA	NA	NA
PARK2	17	11123807	11124219	m	FALSE	Park2	FALSE	NA	NA	NA
SLC22A2	17	12607783	12608088	m	FALSE	Slc22a2	FALSE	NA	NA	NA
IGF2R-TSS	17	12769605	12770120	p	FALSE	Igf2r,Airn,Gm23833	FALSE	NA	NA	NA
SMOC2-INTERGENIC	17	14590437	14590640	m	FALSE	Smoc2, Thbs2	FALSE	NA	NA	NA
