# Supplementary material for: Smchd1 is a maternal effect gene required for genomic imprinting
Source: eLife. 2020 Nov 13;9:e55529. doi: 10.7554/eLife.55529 (PMC7665889; doi:10.7554/eLife.55529)
Supplement: Supplementary file 4. — (a) Differentially methylated CGIs in E14.5 B6Cast male placentae, Smchd1 matΔ versus wt. A CGI is called differentially methylated if the multiple-testing corrected p-value is below 0.05 and the absolute difference in methylation level between the two conditions is at least 10%. (b) Differentially methylated CGIs in E2.75 B6Cast male embryos, Smchd1 matΔ versus wt. A CGI is called differentially methylated if the multiple-testing corrected p-value is below 0.05 and the absolute difference in methylation level between the two conditions is at least 10%. (c) Differentially methylated promoters (−3 to +1 kb) in E2.75 B6Cast male embryos, Smchd1 matΔ versus wt. A CGI is called differentially methylated if the multiple-testing corrected p-value is below 0.05 and the absolute difference in methylation level between the two conditions is at least 10%. (d) Differentially methylated bins (10 kb, tiling the genome without overlaps) in E2.75 B6Cast male embryos, Smchd1 matΔ versus wt. A CGI is called differentially methylated if the multiple-testing corrected p-value is below 0.05 and the absolute difference in methylation level between the two conditions is at least 10%. [file elife-55529-supp4.xlsx]

## Sheet: E14.5_mat_CGI_RRBS
Supplementary file 4a. Differentially methylated CGIs in E14.5 B6Cast male placentae, Smchd1 matΔ vs wt. A CGI is called differentially methylated if the multiple-testing corrected p-value is below 0.05 and the absolute difference in methylation level between the two conditions is at least 10%.
Chromosome	Start	End	Type	Feature	ID	Description	Feature Strand	Type	Feature Orientation	Distance	matdel - wt	162_5_wt	162_6_wt	162_8_wt	163_6_wt	131_2_oodel	131_4_oodel	131_5_oodel	131_7_oodel
1	21201576	21202106	hyperDMR	null					Not found	0	10.6598	42.0999	40.5603	34.158	22.1071	47.0964	42.3287	44.2215	47.9181
1	115447365	115447895	hyperDMR	null					Not found	0	17.2604	32.5505	30.0761	27.4261	49.3965	55.8548	46.9562	58.5368	47.1429
1	131308188	131308927	hyperDMR	Srgap2	ENSMUSG00000026425	SLIT-ROBO Rho GTPase activating protein 2 [Source:MGI Symbol;Acc:MGI:109605]	-	gene	overlapping	0	28.6234	7.14286	70	70	51.8519	82.3529	69.2308	95.2381	66.6667
1	158879587	158880280	hyperDMR	Pappa2	ENSMUSG00000073530	pappalysin 2 [Source:MGI Symbol;Acc:MGI:3051647]	-	gene	overlapping	0	10.383	35.9023	55.4252	45.0376	58	56.0256	70.6433	37.8947	71.3333
2	14124936	14125444	hyperDMR	Stam	ENSMUSG00000026718	signal transducing adaptor molecule (SH3 domain and ITAM motif) 1 [Source:MGI Symbol;Acc:MGI:1329014]	+	gene	overlapping	0	17.4884	63.3333	74.2424	83.3333	79.1667	91.6667	97.2222	81.1403	100
2	16381429	16382171	hyperDMR	Plxdc2	ENSMUSG00000026748	plexin domain containing 2 [Source:MGI Symbol;Acc:MGI:1914698]	+	gene	overlapping	0	18.4896	36.1111	29.7821	41.3263	56.25	63.4163	55.211	55.8405	62.9599
2	124255321	124255851	hyperDMR	Sema6d	ENSMUSG00000027200	sema domain, transmembrane domain (TM), and cytoplasmic domain, (semaphorin) 6D [Source:MGI Symbol;Acc:MGI:2387661]	+	gene	overlapping	0	17.3497	39.697	25	44.4444	50	55.5992	72.9412	40.7407	59.2593
2	141103262	141103783	hyperDMR	Macrod2	ENSMUSG00000068205	MACRO domain containing 2 [Source:MGI Symbol;Acc:MGI:1920149]	+	gene	overlapping	0	13.5024	42.7746	41.473	35.9346	38.0309	38.6507	66.1539	50.0904	57.3275
3	62206030	62206560	hyperDMR	null					Not found	0	13.166	68.75	20	53.3333	22.2222	80	43.3333	63.6364	30
3	109618950	109619462	hyperDMR	Vav3	ENSMUSG00000033721	vav 3 oncogene [Source:MGI Symbol;Acc:MGI:1888518]	+	gene	overlapping	0	22.1577	85.7143	66.4286	78.5714	28.5714	83.3333	97.6191	82.4405	84.5238
3	140156626	140157316	hyperDMR	null					Not found	0	12.6324	41.9444	52.4974	28.1319	33.0799	43.5897	48.6618	57.6587	56.2728
4	20504156	20504860	hyperDMR	Nkain3	ENSMUSG00000055761	Na+/K+ transporting ATPase interacting 3 [Source:MGI Symbol;Acc:MGI:2444830]	-	gene	overlapping	0	12.6168	48.9553	51.244	47.4365	35.795	61.1456	60.9025	63.9666	47.8834
4	94891236	94892180	hyperDMR	null					Not found	0	10.9209	44.1026	44.4444	66.6667	44.4444	53.7415	76.2542	47.6316	65.7143
4	107666810	107667238	hyperDMR	null					Not found	0	51.0624	49.776	16.8702	12.6312	23.9126	74.3355	77.9856	74.6442	80.4743
5	17244462	17247112	hyperDMR	null					Not found	0	17.8266	22.5	30.2326	27.6042	27.5862	44.5035	51.5385	41	42.1875
6	10690612	10691115	hyperDMR	null					Not found	0	13.1926	61.1269	81.5127	3.75	8.33473	59.0246	60.7143	19.2972	68.4588
6	45485727	45486349	hyperDMR	Cntnap2	ENSMUSG00000039419	contactin associated protein-like 2 [Source:MGI Symbol;Acc:MGI:1914047]	+	gene	overlapping	0	17.6615	47.1154	61.4583	12.5	38.8889	74.8677	53.1481	56.6667	45.9259
6	70053045	70053569	hyperDMR	null					Not found	0	12.5387	58.8095	42.6407	52.0768	60.4167	66.0967	63.8636	62.2151	71.9231
7	18402703	18403107	hyperDMR	Gm45104	ENSMUSG00000109209	predicted gene 45104 [Source:MGI Symbol;Acc:MGI:5753680]	-	gene	downstream	1838	35.5964	47.4359	0	28.5714	31.4286	78.5714	81.25	40	50
7	78416106	78416627	hyperDMR	Ntrk3	ENSMUSG00000059146	neurotrophic tyrosine kinase, receptor, type 3 [Source:MGI Symbol;Acc:MGI:97385]	-	gene	overlapping	0	23.2604	35.2611	32.0513	34.7222	46.5993	57.9331	71.3869	48.7614	63.5941
8	39246719	39247216	hyperDMR	null					Not found	0	13.971	46.8167	60.4396	71.1933	26.186	76.3343	72.583	40.5872	71.0152
8	43791716	43792265	hyperDMR	null					Not found	0	18.7654	27.381	56.9805	38.75	16.6667	62.2092	61.5686	38.3492	52.7126
9	88672188	88672653	hyperDMR	null					Not found	0	11.8863	60.4651	42.2076	46.3796	34.8329	39.4505	50.3423	66.1164	75.5212
10	4911406	4912524	hyperDMR	Esr1	ENSMUSG00000019768	estrogen receptor 1 (alpha) [Source:MGI Symbol;Acc:MGI:1352467]	+	gene	overlapping	0	10.7376	18.2737	31.9853	17.2549	32.4101	47.091	40.4993	24.8233	30.4605
11	41111262	41111783	hyperDMR	null					Not found	0	26.0532	7.5	31.25	17.4603	37.5	51.6667	46.3636	44.8927	55
12	55632617	55633493	hyperDMR	Ralgapa1	ENSMUSG00000021027	Ral GTPase activating protein, alpha subunit 1 [Source:MGI Symbol;Acc:MGI:1931050]	-	gene	overlapping	0	14.2476	40.1199	51.8695	53.8146	46.3657	59.8762	63.484	71.8977	53.902
12	101142308	101143232	hyperDMR	null					Not found	0	14.9109	51.7544	42.0227	30.6667	17.9048	43.1818	50.1781	43.8597	64.7727
12	114634423	114634950	hyperDMR	null					Not found	0	23.2757	54.5455	75	58.3333	54.5455	83.8095	72.9082	91.6667	87.1429
14	38542121	38543248	hyperDMR	Nrg3	ENSMUSG00000041014	neuregulin 3 [Source:MGI Symbol;Acc:MGI:1097165]	-	gene	overlapping	0	11.8737	56.4815	50.3333	57.4315	49.2683	64.7299	49.6581	76.1084	70.5128
15	30042446	30043302	hyperDMR	null					Not found	0	18.8483	68.0556	62.987	69.4444	18.4615	47.0588	90.3846	75.6482	81.25
15	52844414	52845330	hyperDMR	null					Not found	0	13.3757	35.1042	50.2795	49.6795	37.3016	58.1161	48.8572	57.4442	61.4499
15	65272838	65273571	hyperDMR	null					Not found	0	13.7302	26.2808	23.5632	37.906	16.2021	39.5928	41.2714	38.5956	39.413
15	72094479	72095221	hyperDMR	null					Not found	0	10.2938	36.4974	31.6587	38.9246	30.1178	45.6449	30.361	44.1586	58.2093
16	16507128	16508285	hyperDMR	Fgd4	ENSMUSG00000022788	FYVE, RhoGEF and PH domain containing 4 [Source:MGI Symbol;Acc:MGI:2183747]	-	gene	overlapping	0	15.2523	46.2963	13.3333	28.4722	5.55556	38.6	31.0667	51.6667	33.3333
16	60747514	60748256	hyperDMR	null					Not found	0	17.0817	52.5049	22.9529	21.2769	34.0909	41.4035	48.7981	68.8399	40.1109
18	90373858	90374591	hyperDMR	null					Not found	0	13.4192	40.6729	23.3231	27.4123	45.9395	60.4642	25.0554	49.9206	55.5844
19	35904068	35905225	hyperDMR	A830019P07Rik	ENSMUSG00000094707	RIKEN cDNA A830019P07 gene [Source:MGI Symbol;Acc:MGI:3028035]	-	gene	overlapping	0	11.1549	44.878	32.9407	34.1893	23.3144	39.3507	60.6503	56.6861	23.2549
X	41180329	41180849	hyperDMR	null					Not found	0	20.3098	79.7674	27.9915	30.4348	75.1226	76.1194	77.1795	50.2564	91
X	72578116	72578858	hyperDMR	Gabra3	ENSMUSG00000031343	gamma-aminobutyric acid (GABA) A receptor, subunit alpha 3 [Source:MGI Symbol;Acc:MGI:95615]	-	gene	overlapping	0	12.0665	43.1073	25.8354	48.7074	40.4258	60.4496	40.2092	47.9634	57.7199
X	150656187	150656749	hyperDMR	Tro	ENSMUSG00000025272	trophinin [Source:MGI Symbol;Acc:MGI:1928994]	-	gene	overlapping	0	13.1463	9.42308	1.20181	5.13834	3.83598	9.05836	29.1667	5.83002	28.1293
X	169996955	169998334	hyperDMR	Mid1	ENSMUSG00000035299	midline 1 [Source:MGI Symbol;Acc:MGI:1100537]	+	gene	overlapping	0	12.0961	0	0	5.26316	8.33333	0	36.7125	3.04622	22.2222
Y	10708893	10709340	hyperDMR	null					Not found	0	14.6144	57.8283	55.7145	57.5838	48.3392	71.4029	68.8804	63.8117	73.8284
2	56068811	56069244	hypoDMR	null					Not found	0	-11.4192	48.8462	82.5893	52.7875	55.9756	58.0894	40.1361	66.6667	29.6296
2	62826643	62827067	hypoDMR	Kcnh7	ENSMUSG00000059742	potassium voltage-gated channel, subfamily H (eag-related), member 7 [Source:MGI Symbol;Acc:MGI:2159566]	-	gene	overlapping	0	-10.9269	56.0082	59.3897	68.8027	57.8847	32.1941	62.461	67.7863	35.9361
2	67089662	67090608	hypoDMR	null					Not found	0	-10.4165	77.5214	72.3333	79.1667	69.7368	58.1624	70.4195	60.2564	68.254
2	162146144	162146814	hypoDMR	Ptprt	ENSMUSG00000053141	protein tyrosine phosphatase, receptor type, T [Source:MGI Symbol;Acc:MGI:1321152]	-	gene	overlapping	0	-22.482	63.7255	80.4301	61.3636	80.3205	55.0414	53.0637	55.4196	32.387
4	144652482	144653159	hypoDMR	null					Not found	0	-11.9528	53.9687	68.1551	65.8657	73.1388	48.2556	63.7049	48.2861	53.0704
5	7621413	7622567	hypoDMR	null					Not found	0	-13.7796	56.6668	59.1138	40.6432	39.505	26.1617	41.8425	39.7689	33.0374
5	50318337	50319213	hypoDMR	Gm7205	ENSMUSG00000105020	predicted gene 7205 [Source:MGI Symbol;Acc:MGI:3643966]	+	gene	overlapping	0	-12.5482	59.652	47.3214	35.9375	43.1373	57.5397	27	25	26.3158
6	41879179	41881291	hypoDMR	null					Not found	0	-13.5121	81.4674	84.1561	83.4468	81.0783	66.0422	77.1598	63.1838	69.7143
6	90309077	90309823	hypoDMR	Chst13	ENSMUSG00000056643	carbohydrate (chondroitin 4) sulfotransferase 13 [Source:MGI Symbol;Acc:MGI:1919047]	-	gene	overlapping	0	-10.4962	69.4353	69.8924	62.6906	75.7064	60.2897	49.6199	65.2448	60.5854
8	48228508	48229133	hypoDMR	Tenm3	ENSMUSG00000031561	teneurin transmembrane protein 3 [Source:MGI Symbol;Acc:MGI:1345183]	-	gene	overlapping	0	-10.8389	55.8495	61.9261	47.6959	35.5348	44.1097	33.4436	51.8427	28.2548
8	49072783	49073431	hypoDMR	Gm45829	ENSMUSG00000110606	predicted gene 45829 [Source:MGI Symbol;Acc:MGI:5804944]	+	gene	upstream	924	-10.5941	84.4653	73.6788	84.8514	78.2708	67.6923	66.184	71.1004	73.913
9	19868589	19869041	hypoDMR	Gm45699	ENSMUSG00000110511	predicted gene 45699 [Source:MGI Symbol;Acc:MGI:5804814]	+	gene	overlapping	0	-36.3989	77.2358	72.2059	72.5	77.9279	21.8261	12.7273	46.9136	72.807
9	24147355	24148991	hypoDMR	Npsr1	ENSMUSG00000043659	neuropeptide S receptor 1 [Source:MGI Symbol;Acc:MGI:2441738]	+	gene	overlapping	0	-19.9098	90.625	83.9286	27.7778	32.5	37.5661	40.2345	26.6667	50.7246
9	81936384	81937117	hypoDMR	Mei4	ENSMUSG00000043289	meiotic double-stranded break formation protein 4 [Source:MGI Symbol;Acc:MGI:1922283]	+	gene	overlapping	0	-10.5332	40	28.3747	5	60	50.7407	37.7232	0	2.77778
9	93019325	93021252	hypoDMR	null					Not found	0	-10.9939	35	65.2174	71.2276	29.6842	54.7101	36.505	29.249	36.6895
9	93323536	93323989	hypoDMR	null					Not found	0	-17.5196	54.0186	50.0703	70.773	60.2504	40.6991	40.3164	47.3589	36.6597
10	51132295	51132953	hypoDMR	null					Not found	0	-12.4731	62.782	75.7755	58.5378	57.0906	51.2188	61.435	48.2526	43.387
12	25591940	25592404	hypoDMR	null					Not found	0	-14.7942	88	80	79.2	88.6667	42.0635	87.5	67.2414	79.8851
12	58156213	58156869	hypoDMR	null					Not found	0	-10.3881	81.4734	69.2051	66.1606	81.25	59.1868	71.9178	64.7941	60.6378
12	93542282	93542734	hypoDMR	null					Not found	0	-13.5645	64.0625	77.907	78.125	57.7161	37.5	51.938	73.9583	60.1562
14	19470012	19470489	hypoDMR	null					Not found	0	-12.0032	73.7401	80.6506	79.9515	81.6879	74.4975	58.8492	69.3564	65.3142
14	35205679	35206516	hypoDMR	Grid1	ENSMUSG00000041078	glutamate receptor, ionotropic, delta 1 [Source:MGI Symbol;Acc:MGI:95812]	+	gene	overlapping	0	-12.1239	69.7647	60.1416	80.4696	86.1578	59.306	80.3666	70.3125	38.053
14	54296698	54297556	hypoDMR	Gm43305	ENSMUSG00000105703	predicted gene 43305 [Source:MGI Symbol;Acc:MGI:5663442]	-	gene	overlapping	0	-14.0234	53.8329	17.0443	57.8713	36.0414	53.0754	20.8485	23.8346	10.9379
14	72915351	72916720	hypoDMR	null					Not found	0	-18.9794	36.8421	51.7869	44.4444	52.8862	28.7302	22.1239	17.6547	41.5335
14	89898191	89899068	hypoDMR	Gm10110	ENSMUSG00000062093	predicted gene 10110 [Source:MGI Symbol;Acc:MGI:3641718]	-	gene	overlapping	0	-11.1177	40.305	45.1669	44.0053	50	32.4148	31.5195	42.4258	28.6463
17	47922203	47922748	hypoDMR	Foxp4	ENSMUSG00000023991	forkhead box P4 [Source:MGI Symbol;Acc:MGI:1921373]	-	gene	overlapping	0	-11.6156	24.802	31.7495	26.6683	33.3604	15.6132	18.1885	20.6551	15.6608
18	43002959	43003955	hypoDMR	Ppp2r2b	ENSMUSG00000024500	protein phosphatase 2, regulatory subunit B, beta [Source:MGI Symbol;Acc:MGI:1920180]	-	gene	overlapping	0	-16.1168	74.1379	53.5714	64.7059	53.0702	39.3398	53.6325	51.3793	36.6667
18	47188402	47188838	hypoDMR	null					Not found	0	-11.8496	74.8302	79.6941	81.8028	85.8429	79.1429	66.4712	54.1402	75.0173
18	89615943	89616413	hypoDMR	Dok6	ENSMUSG00000073514	docking protein 6 [Source:MGI Symbol;Acc:MGI:3639495]	-	gene	overlapping	0	-17.2214	85.0505	93.5897	95	88.6667	50	69.1358	89.2857	85
X	77315302	77316093	hypoDMR	null					Not found	0	-11.618	48.5425	60.5395	28.3522	51.1009	38.0437	32.9862	34.4352	36.5979
X	78230861	78231374	hypoDMR	null					Not found	0	-21.739	64.652	52.4008	60.6743	59.159	39.3452	34.4649	31.6468	44.4733
X	94773747	94774247	hypoDMR	Gm7061	ENSMUSG00000082776	predicted gene 7061 [Source:MGI Symbol;Acc:MGI:3648315]	-	gene	overlapping	0	-11.3043	84.5238	78.5714	76.7857	89.5623	75.5102	69.3452	75.5952	63.7755
Y	90761350	90762300	hypoDMR	Mid1-ps1	ENSMUSG00000095134	midline 1, pseudogene 1 [Source:MGI Symbol;Acc:MGI:5780070]	+	gene	overlapping	0	-30.2581	70.0904	48.5095	47.8973	35.5933	13.5221	30.4056	33.1016	4.02893

## Sheet: E2.75_mat_CGIs_WGBS
Supplementary file 4b. Differentially methylated CGIs in E2.75 B6Cast male embryos, Smchd1 matΔ vs wt. A CGI is called differentially methylated if the multiple-testing corrected p-value is below 0.05 and the absolute difference in methylation level between the two conditions is at least 10%.
chromosome	start	end	mean_wt	mean_oodel	oo_minus_wt	logFC	logCPM	LR	PValue	padj	diff_meth	status
2	85694589	85695019	0.554708	1	0.445292	-6.02989	16.3762	26.7818	2.27772e-07	0.00149806	TRUE	hyper
2	118554972	118555400	0.0358852	0.71117	0.675285	-6.3767	16.9014	29.3197	6.13686e-08	0.000807242	TRUE	hyper
8	48228508	48229133	0.0116588	0.2738	0.262142	-4.78343	19.5558	18.2567	1.93043e-05	0.0362756	TRUE	hyper
11	5861774	5862357	0.337361	0.0721137	-0.265248	5.53045	18.7834	19.9949	7.7647e-06	0.032461	TRUE	hypo
15	72809538	72810123	0.8335	0.333491	-0.500009	3.4793	18.4026	19.3487	1.08895e-05	0.032461	TRUE	hypo
15	75566465	75567062	0.166741	0.0254913	-0.14125	2.72266	18.9611	17.5794	2.75564e-05	0.0453097	TRUE	hypo
18	63449148	63449659	0.137346	0	-0.137346	4.92687	17.4133	18.5693	1.63841e-05	0.0359194	TRUE	hypo
X	87838511	87839040	0.517689	0.026026	-0.491663	5.44328	16.8616	19.1101	1.23388e-05	0.032461	TRUE	hypo

## Sheet: E2.75_mat_promoters_WGBS
Supplementary file 4c. Differentially methylated promoters (-3 to +1 kb) in E2.75 B6Cast male embryos, Smchd1 matΔ vs wt. A CGI is called differentially methylated if the multiple-testing corrected p-value is below 0.05 and the absolute difference in methylation level between the two conditions is at least 10%.
probe	chromosome	start	end	probe_strand	feature	id	description	feature_strand	type	feature_orientation	distance	mean_wt	mean_oodel	oo_minus_wt	logFC	logCPM	LR	PValue	padj	diff_meth	status
Gm37283_upstream	1	130469743	130474743	+	Gm37283	ENSMUSG00000103751	predicted gene, 37283 [Source:MGI Symbol;Acc:MGI:5610511]	+	gene	Name match	0	0.0263883	0.224985	0.198596	-3.17838	18.0679	20.3939	6.30319e-06	0.0255858	TRUE	hyper
Rab7b_upstream	1	131684695	131689695	+	Rab7b	ENSMUSG00000052688	RAB7B, member RAS oncogene family [Source:MGI Symbol;Acc:MGI:2442295]	+	gene	Name match	0	0.0265363	0.234482	0.207946	-3.28942	17.6128	19.3961	1.06223e-05	0.0255858	TRUE	hyper
Neurod1_upstream	2	79455751	79460751	-	Neurod1	ENSMUSG00000034701	neurogenic differentiation 1 [Source:MGI Symbol;Acc:MGI:1339708]	-	gene	Name match	0	0.173779	0.0248734	-0.148905	2.9293	19.8056	30.3466	3.61346e-08	0.000592443	TRUE	hypo
Cerkl_upstream	2	79455785	79460785	-	Cerkl	ENSMUSG00000075256	ceramide kinase-like [Source:MGI Symbol;Acc:MGI:3037816]	-	gene	Name match	0	0.173779	0.0249575	-0.148821	2.92385	19.8022	30.2403	3.81688e-08	0.000592443	TRUE	hypo
Tgm3_upstream	2	130008349	130013349	+	Tgm3	ENSMUSG00000027401	transglutaminase 3, E polypeptide [Source:MGI Symbol;Acc:MGI:98732]	+	gene	Name match	0	0.00944882	0.147843	0.138394	-3.7076	18.5669	19.6464	9.31775e-06	0.0255858	TRUE	hyper
Gm23484_upstream	3	69961445	69966445	-	Gm23484	ENSMUSG00000077366	predicted gene, 23484 [Source:MGI Symbol;Acc:MGI:5453261]	-	gene	Name match	0	0.126028	0.431616	0.305588	-2.81807	18.3604	18.9119	1.36899e-05	0.0265612	TRUE	hyper
Gm43065_upstream	3	103860706	103865706	+	Gm43065	ENSMUSG00000105986	predicted gene 43065 [Source:MGI Symbol;Acc:MGI:5663202]	+	gene	Name match	0	0.0311218	0.216461	0.18534	-2.91585	17.7377	19.2464	1.14884e-05	0.0255858	TRUE	hyper
Gm43322_upstream	3	126974867	126979867	-	Gm43322	ENSMUSG00000105939	predicted gene 43322 [Source:MGI Symbol;Acc:MGI:5663459]	-	gene	Name match	0	0.0556577	0.352633	0.296975	-2.89547	18.3364	26.1241	3.20164e-07	0.00298168	TRUE	hyper
Gm11225_upstream	4	70043157	70048157	+	Gm11225	ENSMUSG00000082368	predicted gene 11225 [Source:MGI Symbol;Acc:MGI:3651505]	+	gene	Name match	0	0.0842465	0.494871	0.410625	-3.37491	17.4164	19.732	8.90987e-06	0.0255858	TRUE	hyper
Tie1_upstream	4	118489061	118494061	-	Tie1	ENSMUSG00000033191	tyrosine kinase with immunoglobulin-like and EGF-like domains 1 [Source:MGI Symbol;Acc:MGI:99906]	-	gene	Name match	0	0.0955314	0.543426	0.447894	-3.65559	17.4965	27.1856	1.8483e-07	0.00215166	TRUE	hyper
Gm44483_upstream	5	4798457	4803457	+	Gm44483	ENSMUSG00000104656	predicted gene, 44483 [Source:MGI Symbol;Acc:MGI:5690875]	+	gene	Name match	0	0.069336	0.340746	0.27141	-2.6827	18.1362	19.2877	1.12425e-05	0.0255858	TRUE	hyper
Gm8861_upstream	5	10953406	10958406	+	Gm8861	ENSMUSG00000104834	predicted gene 8861 [Source:MGI Symbol;Acc:MGI:3648005]	+	gene	Name match	0	0.319002	0.0192833	-0.299719	3.73097	17.066	18.0443	2.15822e-05	0.0321968	TRUE	hypo
Tmem214_upstream	5	30864012	30869012	+	Tmem214	ENSMUSG00000038828	transmembrane protein 214 [Source:MGI Symbol;Acc:MGI:1916046]	+	gene	Name match	0	0.0470307	0.298869	0.251838	-3.09076	18.9241	19.5706	9.69478e-06	0.0255858	TRUE	hyper
Gm13821_upstream	5	114841075	114846075	-	Gm13821	ENSMUSG00000107256	predicted gene 13821 [Source:MGI Symbol;Acc:MGI:3652003]	-	gene	Name match	0	0.0678805	0.309135	0.241254	-2.73662	19.2207	19.7935	8.62763e-06	0.0255858	TRUE	hyper
Gm43479_upstream	6	39236114	39241114	+	Gm43479	ENSMUSG00000107365	predicted gene 43479 [Source:MGI Symbol;Acc:MGI:5663616]	+	gene	Name match	0	0.0299543	0.215783	0.185829	-3.02521	18.3038	24.1423	8.94731e-07	0.00694385	TRUE	hyper
Gm25373_upstream	6	145460189	145465189	+	Gm25373	ENSMUSG00000088781	predicted gene, 25373 [Source:MGI Symbol;Acc:MGI:5455150]	+	gene	Name match	0	0.096855	0.361882	0.265027	-2.58139	18.9778	18.5182	1.68287e-05	0.0301395	TRUE	hyper
Sdr42e1_upstream	8	117672689	117677689	-	Sdr42e1	ENSMUSG00000034308	short chain dehydrogenase/reductase family 42E, member 1 [Source:MGI Symbol;Acc:MGI:1921282]	-	gene	Name match	0	0.0766388	0.261631	0.184993	-2.22751	18.8717	16.7976	4.1586e-05	0.0442335	TRUE	hyper
Gm17571_upstream	9	13445753	13450753	-	Gm17571	ENSMUSG00000090592	predicted gene, 17571 [Source:MGI Symbol;Acc:MGI:4937205]	-	gene	Name match	0	0.0542175	0.319455	0.265237	-2.81516	17.2207	16.7247	4.3214e-05	0.0442335	TRUE	hyper
AC140448.1_upstream	9	35184663	35189663	+	AC140448.1	ENSMUSG00000110774	No description	+	gene	Name match	0	0.0952755	0.361467	0.266192	-2.36209	19.3995	16.4947	4.87853e-05	0.0455246	TRUE	hyper
Gm44311_upstream	9	42438852	42443852	+	Gm44311	ENSMUSG00000104589	predicted gene, 44311 [Source:MGI Symbol;Acc:MGI:5690703]	+	gene	Name match	0	0.018966	0.14457	0.125604	-3.0352	18.091	18.2006	1.98814e-05	0.0319233	TRUE	hyper
AC134859.2_upstream	9	46504073	46509073	-	AC134859.2	ENSMUSG00000111115	No description	-	gene	Name match	0	0.200747	0.533091	0.332344	-2.13521	17.9101	17.02	3.69886e-05	0.0410089	TRUE	hyper
n-R5s92_upstream	9	115625718	115630718	-	n-R5s92	ENSMUSG00000094630	nuclear encoded rRNA 5S 92 [Source:MGI Symbol;Acc:MGI:4421940]	-	gene	Name match	0	0.0627089	0.35165	0.288941	-2.8523	18.909	17.9969	2.2126e-05	0.0321968	TRUE	hyper
AC107851.1_upstream	9	115676743	115681743	+	AC107851.1	ENSMUSG00000110905	No description	+	gene	Name match	0	0.0300672	0.380691	0.350624	-4.04553	18.0265	37.4781	9.24457e-10	4.30474e-05	TRUE	hyper
Gm16142_upstream	9	116000788	116005788	-	Gm16142	ENSMUSG00000087469	predicted gene 16142 [Source:MGI Symbol;Acc:MGI:3802121]	-	gene	Name match	0	0.265582	0.634455	0.368873	-2.35967	18.1399	19.3808	1.07079e-05	0.0255858	TRUE	hyper
AC168222.3_upstream	10	3172020	3177020	+	AC168222.3	ENSMUSG00000111625	No description	+	gene	Name match	0	0.0572796	0.358931	0.301652	-3.1425	16.7786	17.6901	2.5998e-05	0.0352424	TRUE	hyper
CAAA01090905.1_upstream	10	67442429	67447429	-	CAAA01090905.1	ENSMUSG00000112726	No description	-	gene	Name match	0	0.179473	0.542971	0.363498	-2.56814	17.7426	17.3044	3.18446e-05	0.0400769	TRUE	hyper
AC099715.1_upstream	10	97710772	97715772	+	AC099715.1	ENSMUSG00000112497	No description	+	gene	Name match	0	0.171269	0.554861	0.383592	-2.5518	17.2755	16.528	4.79371e-05	0.0455246	TRUE	hyper
Cd300lb_upstream	11	114933386	114938386	-	Cd300lb	ENSMUSG00000063193	CD300 molecule like family member B [Source:MGI Symbol;Acc:MGI:2685099]	-	gene	Name match	0	0.0311604	0.192797	0.161637	-2.83142	18.2066	17.2288	3.31372e-05	0.0406062	TRUE	hyper
Ighv5-8_upstream	12	113650967	113655967	+	Ighv5-8	ENSMUSG00000103262	immunoglobulin heavy variable V5-8 [Source:MGI Symbol;Acc:MGI:5009890]	-	gene	Name match	0	0.130196	0.654274	0.524077	-3.87494	16.0929	18.7045	1.52626e-05	0.0284281	TRUE	hyper
Ighv5-8_upstream	12	113654424	113659424	-	Ighv5-8	ENSMUSG00000103262	immunoglobulin heavy variable V5-8 [Source:MGI Symbol;Acc:MGI:5009890]	-	gene	Name match	0	0.0689076	0.560268	0.49136	-3.87494	16.0929	18.7045	1.52626e-05	0.0284281	TRUE	hyper
Hist1h2bq_upstream	13	21809197	21814197	-	Hist1h2bq	ENSMUSG00000069307	histone cluster 1, H2bq [Source:MGI Symbol;Acc:MGI:3702051]	-	gene	Name match	0	0	0.113473	0.113473	-5.74413	17.8481	19.2194	1.16522e-05	0.0255858	TRUE	hyper
Gm18711_upstream	14	53462079	53467079	+	Gm18711	ENSMUSG00000105666	predicted gene, 18711 [Source:MGI Symbol;Acc:MGI:5010896]	+	gene	Name match	0	0.461658	0.0650099	-0.396648	3.50594	16.5968	19.3538	1.08604e-05	0.0255858	TRUE	hypo
Gm25130_upstream	14	99359827	99364827	-	Gm25130	ENSMUSG00000064584	predicted gene, 25130 [Source:MGI Symbol;Acc:MGI:5454907]	-	gene	Name match	0	0.0906436	0.390037	0.299394	-2.64153	17.7056	21.2173	4.10047e-06	0.0238673	TRUE	hyper
Krt86_upstream	15	101469478	101474478	+	Krt86	ENSMUSG00000067614	keratin 86 [Source:MGI Symbol;Acc:MGI:109362]	+	gene	Name match	0	0.0270203	0.171821	0.144801	-2.79587	18.8627	20.0271	7.63517e-06	0.0255858	TRUE	hyper
1700010I14Rik_upstream	17	8984333	8989333	+	1700010I14Rik	ENSMUSG00000023873	RIKEN cDNA 1700010I14 gene [Source:MGI Symbol;Acc:MGI:1914181]	+	gene	Name match	0	0.0254923	0.169874	0.144382	-3.01978	18.6035	17.0356	3.66848e-05	0.0410089	TRUE	hyper
Slc9a3r2_upstream	17	24649305	24654305	-	Slc9a3r2	ENSMUSG00000002504	solute carrier family 9 (sodium/hydrogen exchanger), member 3 regulator 2 [Source:MGI Symbol;Acc:MGI:1890662]	-	gene	Name match	0	0.138235	0.017129	-0.121106	3.11817	20.2075	22.2547	2.38778e-06	0.0158839	TRUE	hypo
Prelid2_upstream	18	41950194	41955194	-	Prelid2	ENSMUSG00000056671	PRELI domain containing 2 [Source:MGI Symbol;Acc:MGI:1924869]	-	gene	Name match	0	0.0886524	0.35446	0.265807	-2.56603	18.9736	19.0702	1.25999e-05	0.0255858	TRUE	hyper
Gm21542_upstream	19	23662591	23667591	+	Gm21542	ENSMUSG00000098010	predicted gene, 21542 [Source:MGI Symbol;Acc:MGI:5434897]	+	gene	Name match	0	0.0157438	0.145433	0.129689	-3.22106	17.5503	16.491	4.88828e-05	0.0455246	TRUE	hyper
Gm5380_upstream	X	13298285	13303285	+	Gm5380	ENSMUSG00000081255	predicted gene 5380 [Source:MGI Symbol;Acc:MGI:3643773]	+	gene	Name match	0	0.0190883	0.307947	0.288859	-4.46596	16.7928	18.0549	2.14624e-05	0.0321968	TRUE	hyper
Cypt1_upstream	X	16518869	16523869	+	Cypt1	ENSMUSG00000023257	cysteine-rich perinuclear theca 1 [Source:MGI Symbol;Acc:MGI:3616441]	+	gene	Name match	0	0.0156923	0.24113	0.225438	-3.57853	16.9485	16.5007	4.86327e-05	0.0455246	TRUE	hyper
Rhox12_upstream	X	38109907	38114907	-	Rhox12	ENSMUSG00000071766	reproductive homeobox 12 [Source:MGI Symbol;Acc:MGI:2685994]	-	gene	Name match	0	0.308519	0.758756	0.450237	-2.91749	17.2066	19.189	1.18395e-05	0.0255858	TRUE	hyper
1110012L19Rik_upstream	X	70381877	70386877	+	1110012L19Rik	ENSMUSG00000045237	RIKEN cDNA 1110012L19 gene [Source:MGI Symbol;Acc:MGI:1915868]	+	gene	Name match	0	0.0332678	0.246417	0.213149	-2.9623	17.781	16.7037	4.36967e-05	0.0442335	TRUE	hyper
Gm17267_upstream	X	126013557	126018557	+	Gm17267	ENSMUSG00000094203	predicted gene, 17267 [Source:MGI Symbol;Acc:MGI:4936901]	+	gene	Name match	0	0.481061	0.0448495	-0.436211	4.35085	16.5194	17.0385	3.66296e-05	0.0410089	TRUE	hypo
Gm23786_upstream	X	162744554	162749554	+	Gm23786	ENSMUSG00000080394	predicted gene, 23786 [Source:MGI Symbol;Acc:MGI:5453563]	+	gene	Name match	0	0.118337	0.00235849	-0.115979	3.91013	17.2518	17.6009	2.72464e-05	0.0352424	TRUE	hypo
Gm23786_upstream	X	162744556	162749556	+	Gm23786	ENSMUSG00000080394	predicted gene, 23786 [Source:MGI Symbol;Acc:MGI:5453563]	+	gene	Name match	0	0.118337	0.00235849	-0.115979	3.91013	17.2518	17.6009	2.72464e-05	0.0352424	TRUE	hypo

## Sheet: E2.75_mat_10kb_bins_WGBS
Supplementary file 4d. Differentially methylated bins (10 kb, tiling the genome without overlaps) in E2.75 B6Cast male embryos, Smchd1 matΔ vs wt. A CGI is called differentially methylated if the multiple-testing corrected p-value is below 0.05 and the absolute difference in methylation level between the two conditions is at least 10%.
chromosome	start	end	mean_wt	mean_oodel	oo_minus_wt	logFC	logCPM	LR	PValue	padj	diff_meth	status
1	6200001	6210000	0.049072	0.258845	0.209773	-2.59638	18.0044	21.275	3.97881e-06	0.0068624	TRUE	hyper
1	11530001	11540000	0.0675869	0.245983	0.178396	-2.02685	18.8849	18.0898	2.10727e-05	0.0170551	TRUE	hyper
1	13200001	13210000	0.181604	0.417196	0.235591	-1.78837	19.2997	14.0674	0.000176375	0.0472767	TRUE	hyper
1	15630001	15640000	0.0371212	0.191936	0.154815	-2.55558	18.2398	14.4065	0.000147294	0.0447042	TRUE	hyper
1	18980001	18990000	0.13813	0.377344	0.239214	-1.86546	17.7426	16.2623	5.51511e-05	0.0286794	TRUE	hyper
1	21030001	21040000	0.0794912	0.224674	0.145183	-1.75121	18.9262	14.1655	0.000167414	0.0468025	TRUE	hyper
1	37230001	37240000	0.0537744	0.177301	0.123526	-1.87761	19.5356	19.1888	1.18406e-05	0.0123383	TRUE	hyper
1	43260001	43270000	0.300993	0.597138	0.296145	-1.82276	19.2501	16.9752	3.78717e-05	0.0235018	TRUE	hyper
1	51100001	51110000	0.232427	0.611491	0.379064	-2.30362	17.6075	16.9819	3.77369e-05	0.0234764	TRUE	hyper
1	56900001	56910000	0.332587	0.587081	0.254494	-1.5353	17.9036	14.2613	0.000159107	0.0463003	TRUE	hyper
1	58980001	58990000	0.358099	0.620741	0.262642	-1.55901	18.6561	16.7315	4.30597e-05	0.0249997	TRUE	hyper
1	59070001	59080000	0.0324843	0.146073	0.113588	-2.16013	18.5236	14.1251	0.000171047	0.0470816	TRUE	hyper
1	60030001	60040000	0.102491	0.338899	0.236408	-2.10277	18.4026	21.1837	4.17295e-06	0.00698947	TRUE	hyper
1	62070001	62080000	0.163039	0.443044	0.280006	-1.9401	17.7474	15.9376	6.54645e-05	0.0308321	TRUE	hyper
1	62200001	62210000	0.169217	0.543714	0.374497	-2.59038	17.1157	19.9792	7.82874e-06	0.0097797	TRUE	hyper
1	73270001	73280000	0.302188	0.580602	0.278414	-1.6328	18.4011	14.3973	0.000148018	0.0447609	TRUE	hyper
1	75600001	75610000	0.0746424	0.202196	0.127553	-1.81861	19.5398	13.9585	0.000186886	0.0486345	TRUE	hyper
1	75610001	75620000	0.0429536	0.145057	0.102104	-1.90607	19.0977	15.0915	0.000102425	0.0382038	TRUE	hyper
1	81250001	81260000	0.132902	0.426806	0.293905	-2.53723	17.8992	17.1011	3.54418e-05	0.0224469	TRUE	hyper
1	84630001	84640000	0.0197962	0.127569	0.107773	-2.80822	18.7365	20.5982	5.66504e-06	0.00795259	TRUE	hyper
1	84640001	84650000	0.0809973	0.264876	0.183879	-2.03611	18.6918	17.9105	2.31534e-05	0.0175466	TRUE	hyper
1	86690001	86700000	0.0267435	0.147614	0.12087	-2.67053	17.986	16.062	6.13034e-05	0.0299484	TRUE	hyper
1	88470001	88480000	0.0835145	0.298041	0.214526	-2.41914	19.1844	21.6613	3.2529e-06	0.00621305	TRUE	hyper
1	88480001	88490000	0.0722741	0.27751	0.205236	-2.36777	19.0395	24.4534	7.61295e-07	0.00235545	TRUE	hyper
1	89370001	89380000	0.0533881	0.234945	0.181557	-2.35887	17.9922	16.0238	6.25499e-05	0.0302305	TRUE	hyper
1	90090001	90100000	0.0397554	0.155067	0.115311	-1.98565	19.6095	13.9928	0.00018351	0.0483193	TRUE	hyper
1	90430001	90440000	0.0754783	0.250729	0.17525	-2.11199	18.6792	18.3817	1.80782e-05	0.0156133	TRUE	hyper
1	91210001	91220000	0.0456596	0.258254	0.212595	-2.81514	19.1325	20.7015	5.36738e-06	0.00773995	TRUE	hyper
1	93250001	93260000	0.24769	0.495533	0.247843	-1.60272	19.5792	19.6166	9.46432e-06	0.0107941	TRUE	hyper
1	114100001	114110000	0.216808	0.547649	0.330841	-2.19424	17.3541	16.7375	4.29231e-05	0.0249997	TRUE	hyper
1	116040001	116050000	0.127331	0.366049	0.238719	-1.98565	17.7106	15.801	7.03665e-05	0.0314808	TRUE	hyper
1	116470001	116480000	0.194597	0.490161	0.295565	-1.99369	17.2449	15.3485	8.93904e-05	0.0353165	TRUE	hyper
1	117250001	117260000	0.0874359	0.456396	0.36896	-2.93097	16.7401	17.2426	3.28973e-05	0.0214809	TRUE	hyper
1	117470001	117480000	0.123564	0.41138	0.287815	-2.31623	17.525	15.9058	6.65729e-05	0.0308732	TRUE	hyper
1	120100001	120110000	0.135107	0.355582	0.220475	-1.8427	19.3636	14.2919	0.000156535	0.045865	TRUE	hyper
1	120200001	120210000	0.0921236	0.266343	0.17422	-1.85918	19.3145	15.6883	7.46832e-05	0.0322666	TRUE	hyper
1	127170001	127180000	0.10869	0.41623	0.30754	-2.43859	18.2772	21.5727	3.40658e-06	0.00631535	TRUE	hyper
1	127490001	127500000	0.165416	0.465811	0.300395	-2.16263	19.1352	16.0318	6.22869e-05	0.0302305	TRUE	hyper
1	127550001	127560000	0.268432	0.53711	0.268677	-1.73548	18.5008	15.9794	6.40341e-05	0.030503	TRUE	hyper
1	128310001	128320000	0.420205	0.144627	-0.275579	2.95395	19.3754	14.4618	0.000143033	0.044247	TRUE	hypo
1	130470001	130480000	0.0920208	0.340683	0.248662	-2.29622	18.6075	19.8525	8.36544e-06	0.01001	TRUE	hyper
1	130670001	130680000	0.199211	0.487077	0.287866	-2.11621	18.647	18.5028	1.69652e-05	0.0150988	TRUE	hyper
1	134200001	134210000	0.28272	0.493707	0.210988	-1.30584	20.1876	14.2311	0.000161674	0.0465838	TRUE	hyper
1	134590001	134600000	0.159178	0.500211	0.341033	-2.39316	18.6753	21.0642	4.4415e-06	0.00707492	TRUE	hyper
1	135220001	135230000	0.0777215	0.293179	0.215458	-2.24679	19.6899	15.3962	8.71639e-05	0.0347111	TRUE	hyper
1	138610001	138620000	0.0256791	0.132327	0.106648	-2.39209	20.1081	17.4958	2.87947e-05	0.0197293	TRUE	hyper
1	139920001	139930000	0.451411	0.127267	-0.324144	2.80501	18.5503	23.6957	1.12834e-06	0.00310093	TRUE	hypo
1	143710001	143720000	0.0896673	0.341582	0.251914	-2.29902	17.8661	15.2066	9.63676e-05	0.036907	TRUE	hyper
1	143720001	143730000	0.109609	0.479137	0.369528	-2.94183	18.5669	45.5615	1.47924e-11	6.16564e-07	TRUE	hyper
1	143730001	143740000	0.0390454	0.211679	0.172633	-2.68807	19.7168	16.6982	4.38228e-05	0.0251365	TRUE	hyper
1	143740001	143750000	0.0694175	0.325981	0.256564	-2.67113	19.1389	27.291	1.75021e-07	0.000931289	TRUE	hyper
1	148830001	148840000	0.210437	0.607988	0.397551	-2.56093	16.6496	17.5701	2.76904e-05	0.0193871	TRUE	hyper
1	150930001	150940000	0.144441	0.404584	0.260143	-2.06318	18.1491	15.879	6.75224e-05	0.0308732	TRUE	hyper
1	151070001	151080000	0.0345922	0.135618	0.101026	-2.12305	19.3104	17.5084	2.8604e-05	0.0196524	TRUE	hyper
1	151930001	151940000	0.0710311	0.257577	0.186546	-2.61643	19.7928	24.9587	5.85706e-07	0.00197942	TRUE	hyper
1	151950001	151960000	0.142412	0.373287	0.230875	-2.03147	18.9273	18.2148	1.97341e-05	0.0165058	TRUE	hyper
1	152050001	152060000	0.0364351	0.140978	0.104543	-2.21207	19.4194	15.4677	8.39276e-05	0.0341288	TRUE	hyper
1	152220001	152230000	0.151371	0.452332	0.300961	-2.27469	19.1925	27.4597	1.60403e-07	0.000872061	TRUE	hyper
1	152360001	152370000	0.095724	0.344892	0.249168	-2.24259	18.4979	22.9691	1.64625e-06	0.00406549	TRUE	hyper
1	152490001	152500000	0.522796	0.206157	-0.316639	2.17714	18.7438	21.3659	3.79452e-06	0.00673022	TRUE	hypo
1	152810001	152820000	0.0457533	0.307974	0.262221	-3.18371	19.1546	31.9969	1.54416e-08	0.000167902	TRUE	hyper
1	157380001	157390000	0.259339	0.591334	0.331995	-2.09122	17.8882	20.5647	5.7648e-06	0.00800946	TRUE	hyper
1	163290001	163300000	0.0994021	0.393783	0.294381	-2.47788	18.2552	30.0747	4.15724e-08	0.000335378	TRUE	hyper
1	167850001	167860000	0.0775738	0.315081	0.237507	-2.52333	17.8138	18.8632	1.40437e-05	0.0134565	TRUE	hyper
1	173230001	173240000	0.175495	0.493986	0.318491	-2.15796	17.9464	20.1276	7.24439e-06	0.00929091	TRUE	hyper
1	176050001	176060000	0.0222234	0.145023	0.1228	-2.85972	18.1231	16.9248	3.88894e-05	0.023881	TRUE	hyper
1	178460001	178470000	0.0982716	0.292841	0.19457	-1.85755	17.8838	14.1208	0.000171441	0.0470816	TRUE	hyper
1	178700001	178710000	0.208724	0.506285	0.297561	-1.96389	18.718	20.9627	4.68324e-06	0.00714157	TRUE	hyper
1	178840001	178850000	0.0506916	0.211034	0.160342	-2.20764	18.6195	19.8694	8.29162e-06	0.0100051	TRUE	hyper
1	178860001	178870000	0.0508739	0.194058	0.143184	-2.07601	19.3356	21.6045	3.35069e-06	0.00630048	TRUE	hyper
1	178880001	178890000	0.230562	0.48517	0.254608	-1.70291	19.2458	18.3023	1.88475e-05	0.0160324	TRUE	hyper
1	178890001	178900000	0.148708	0.444629	0.295921	-2.3729	18.808	18.4594	1.73561e-05	0.0153679	TRUE	hyper
1	179640001	179650000	0.0648878	0.198675	0.133787	-1.88519	18.987	16.6489	4.49773e-05	0.0255375	TRUE	hyper
1	182100001	182110000	0.0382432	0.145677	0.107434	-1.95984	19.5833	14.431	0.000145389	0.044483	TRUE	hyper
1	184900001	184910000	0.0768408	0.301399	0.224558	-2.41663	19.7224	14.3998	0.00014782	0.0447609	TRUE	hyper
1	185020001	185030000	0.0413353	0.169664	0.128328	-2.31216	19.6516	19.9499	7.9497e-06	0.00984216	TRUE	hyper
1	185050001	185060000	0.0947476	0.255143	0.160395	-1.7187	19.2058	14.6	0.000132917	0.0428913	TRUE	hyper
1	185610001	185620000	0.120833	0.34365	0.222818	-2.07064	18.7279	14.1717	0.000166859	0.0468025	TRUE	hyper
1	190720001	190730000	0.0305184	0.151744	0.121226	-2.37005	19.2119	19.3453	1.09085e-05	0.0118099	TRUE	hyper
1	190780001	190790000	0.146182	0.366007	0.219825	-1.87227	19.0543	14.0639	0.000176703	0.0473137	TRUE	hyper
2	4610001	4620000	0.120708	0.325335	0.204627	-1.98007	19.4622	18.6444	1.57512e-05	0.0143243	TRUE	hyper
2	11420001	11430000	0.0608282	0.203665	0.142837	-1.85184	18.8705	13.8791	0.00019495	0.049994	TRUE	hyper
2	20460001	20470000	0.0603335	0.237447	0.177113	-2.14301	17.8683	16.2099	5.6697e-05	0.0289957	TRUE	hyper
2	20630001	20640000	0.255424	0.547533	0.292109	-1.9674	17.7304	14.3829	0.000149151	0.0448948	TRUE	hyper
2	25890001	25900000	0.0477883	0.183127	0.135339	-2.2821	19.6353	15.099	0.000102016	0.038193	TRUE	hyper
2	25900001	25910000	0.116637	0.292396	0.175759	-1.70012	20.3793	14.1056	0.00017283	0.0471862	TRUE	hyper
2	39240001	39250000	0.348889	0.0885045	-0.260384	2.71156	16.5363	15.8231	6.95497e-05	0.0313396	TRUE	hypo
2	52560001	52570000	0.278001	0.524567	0.246566	-1.56894	18.3088	14.5226	0.000138489	0.0435426	TRUE	hyper
2	67170001	67180000	0.188484	0.572255	0.383771	-2.46472	16.9443	14.6774	0.000127569	0.0420963	TRUE	hyper
2	69570001	69580000	0.121364	0.375839	0.254475	-2.31149	17.9401	17.9918	2.21859e-05	0.0174478	TRUE	hyper
2	80110001	80120000	0.213662	0.577508	0.363847	-2.43572	17.7006	18.8053	1.44762e-05	0.0136102	TRUE	hyper
2	80370001	80380000	0.0926724	0.269717	0.177045	-1.8319	18.6715	15.8596	6.82188e-05	0.0310758	TRUE	hyper
2	82970001	82980000	0.181675	0.503948	0.322274	-2.08242	17.2922	15.1318	0.000100263	0.0378393	TRUE	hyper
2	90830001	90840000	0.0520298	0.211564	0.159534	-2.16007	18.3667	14.9613	0.000109739	0.0394881	TRUE	hyper
2	100170001	100180000	0.152222	0.53635	0.384128	-2.58878	16.8661	17.2446	3.28631e-05	0.0214809	TRUE	hyper
2	102160001	102170000	0.0915244	0.334548	0.243023	-2.35555	19.2242	14.739	0.000123464	0.0414453	TRUE	hyper
2	102170001	102180000	0.20863	0.459082	0.250452	-1.80545	19.1871	14.8475	0.000116562	0.0408782	TRUE	hyper
2	111620001	111630000	0.0642698	0.359692	0.295422	-2.83003	16.7643	18.73	1.50593e-05	0.0140005	TRUE	hyper
2	115390001	115400000	0.18433	0.469009	0.284679	-2.04236	18.5391	15.9293	6.57541e-05	0.0308732	TRUE	hyper
2	128570001	128580000	0.0449722	0.16507	0.120098	-1.97482	19.0958	14.6829	0.000127195	0.0420766	TRUE	hyper
2	130010001	130020000	0.0410793	0.188483	0.147404	-2.3513	19.1371	16.1811	5.75659e-05	0.0292018	TRUE	hyper
2	130850001	130860000	0.115505	0.31836	0.202856	-1.95436	17.7975	14.2571	0.000159461	0.0463173	TRUE	hyper
2	132710001	132720000	0.101657	0.238071	0.136414	-1.5206	19.2198	14.4443	0.000144368	0.0443544	TRUE	hyper
2	136760001	136770000	0.141024	0.446848	0.305825	-2.23123	17.1925	15.3178	9.08549e-05	0.0357252	TRUE	hyper
2	143790001	143800000	0.152152	0.431192	0.27904	-2.03538	18.0757	14.8215	0.000118179	0.0408782	TRUE	hyper
2	147960001	147970000	0.0608316	0.242906	0.182074	-2.39517	18.5037	14.8555	0.000116068	0.0408216	TRUE	hyper
2	151530001	151540000	0.0103448	0.115262	0.104918	-3.41916	18.0464	18.0309	2.17344e-05	0.0173658	TRUE	hyper
2	155260001	155270000	0.0232026	0.145661	0.122459	-2.7546	18.8219	15.7407	7.26424e-05	0.0319737	TRUE	hyper
2	158330001	158340000	0.136024	0.32417	0.188146	-1.52536	19.3887	14.9333	0.000111377	0.0397347	TRUE	hyper
2	169310001	169320000	0.105194	0.268695	0.163501	-1.60466	18.8728	14.2629	0.000158965	0.0463003	TRUE	hyper
2	169390001	169400000	0.0558082	0.18277	0.126962	-1.84386	19.1655	14.2236	0.000162319	0.0465838	TRUE	hyper
2	170640001	170650000	0.070965	0.253024	0.182059	-2.2033	19.0708	15.8899	6.71358e-05	0.0308732	TRUE	hyper
2	170910001	170920000	0.110336	0.302822	0.192486	-1.97741	19.4263	14.7241	0.000124446	0.0416005	TRUE	hyper
2	171020001	171030000	0.18268	0.532874	0.350194	-2.37268	18.7751	25.2904	4.93155e-07	0.0018137	TRUE	hyper
2	171040001	171050000	0.189959	0.479414	0.289456	-1.9412	18.7631	21.1357	4.27874e-06	0.00698947	TRUE	hyper
2	171050001	171060000	0.151054	0.357977	0.206923	-1.64059	18.8739	16.0218	6.26157e-05	0.0302305	TRUE	hyper
2	171060001	171070000	0.163324	0.429433	0.266108	-1.98664	18.1745	16.152	5.84555e-05	0.0294635	TRUE	hyper
2	171370001	171380000	0.112796	0.30955	0.196754	-2.07819	18.3202	14.6992	0.000126102	0.0419367	TRUE	hyper
2	171900001	171910000	0.181885	0.397562	0.215677	-1.75202	18.2922	14.8644	0.000115524	0.0407492	TRUE	hyper
2	174600001	174610000	0.0691738	0.247449	0.178276	-2.06349	19.3809	19.2509	1.14618e-05	0.012146	TRUE	hyper
2	174620001	174630000	0.0761437	0.263877	0.187733	-2.08464	19.6418	15.5589	7.99722e-05	0.0331126	TRUE	hyper
2	174930001	174940000	0.173339	0.375613	0.202274	-1.51167	19.2066	16.3891	5.15822e-05	0.0279475	TRUE	hyper
2	178050001	178060000	0.244862	0.470504	0.225642	-1.46854	18.2972	14.5873	0.000133815	0.0430052	TRUE	hyper
2	179400001	179410000	0.0491756	0.191771	0.142595	-2.06694	18.9695	14.9301	0.000111566	0.0397453	TRUE	hyper
3	8460001	8470000	0.0559544	0.278496	0.222541	-2.89108	19.7075	17.6765	2.61835e-05	0.0188166	TRUE	hyper
3	10840001	10850000	0.102282	0.360008	0.257726	-2.22315	17.9036	14.6363	0.000130381	0.0425119	TRUE	hyper
3	12250001	12260000	0.0908332	0.32389	0.233057	-2.12248	17.2277	14.5441	0.000136915	0.0435078	TRUE	hyper
3	15960001	15970000	0.18451	0.459499	0.274989	-2.20073	17.3856	14.151	0.000168707	0.0468025	TRUE	hyper
3	20970001	20980000	0.0999984	0.345812	0.245814	-2.13087	18.1306	18.239	1.94852e-05	0.0163523	TRUE	hyper
3	21540001	21550000	0.0278889	0.313567	0.285678	-3.91882	17.9632	35.1233	3.09482e-09	4.55279e-05	TRUE	hyper
3	22080001	22090000	0.111249	0.319173	0.207924	-2.25192	19.3014	17.7812	2.47823e-05	0.0181752	TRUE	hyper
3	22090001	22100000	0.0930164	0.35236	0.259344	-2.48267	18.4087	29.3932	5.90853e-08	0.000447771	TRUE	hyper
3	24990001	25000000	0.267674	0.635315	0.367641	-2.24166	17.3949	17.9131	2.31227e-05	0.0175466	TRUE	hyper
3	25000001	25010000	0.243797	0.552272	0.308475	-2.07925	18.11	16.7766	4.2048e-05	0.0247816	TRUE	hyper
3	25480001	25490000	0.353361	0.63725	0.283889	-1.74604	17.6418	13.8746	0.000195426	0.049994	TRUE	hyper
3	26830001	26840000	0.0482007	0.248025	0.199825	-2.69522	19.2722	25.8219	3.74423e-07	0.00161445	TRUE	hyper
3	27610001	27620000	0.0869557	0.204362	0.117407	-1.45857	19.7839	14.3725	0.000149973	0.0448948	TRUE	hyper
3	28750001	28760000	0.297462	0.567704	0.270242	-1.60766	18.1655	16.7198	4.33256e-05	0.0250814	TRUE	hyper
3	28760001	28770000	0.0978524	0.304932	0.20708	-2.06324	18.6261	17.6429	2.66504e-05	0.0189672	TRUE	hyper
3	29950001	29960000	0.193711	0.53406	0.340349	-2.23986	17.9506	18.3142	1.87301e-05	0.0159869	TRUE	hyper
3	29960001	29970000	0.192052	0.439502	0.24745	-1.82496	18.4921	14.5392	0.000137271	0.0435265	TRUE	hyper
3	30680001	30690000	0.0377889	0.232008	0.194219	-2.89961	19.0235	26.0811	3.27373e-07	0.00148858	TRUE	hyper
3	31260001	31270000	0.139573	0.315387	0.175814	-1.55469	18.9643	15.2171	9.58304e-05	0.0368123	TRUE	hyper
3	32870001	32880000	0.0438273	0.220645	0.176817	-2.49149	18.7006	20.4084	6.25562e-06	0.00851742	TRUE	hyper
3	33570001	33580000	0.249165	0.616007	0.366842	-2.09085	17.3793	14.3599	0.000150983	0.0450886	TRUE	hyper
3	33690001	33700000	0.175179	0.482612	0.307434	-2.10375	17.3022	15.9565	6.48144e-05	0.0305835	TRUE	hyper
3	34390001	34400000	0.243232	0.571682	0.328449	-2.18102	19.1343	16.687	4.40815e-05	0.025227	TRUE	hyper
3	38590001	38600000	0.102778	0.322006	0.219228	-2.14292	17.3153	13.979	0.000184867	0.0483607	TRUE	hyper
3	49660001	49670000	0.158005	0.572617	0.414612	-2.68993	17.647	21.2167	4.10175e-06	0.00698947	TRUE	hyper
3	52210001	52220000	0.0231508	0.169914	0.146763	-3.16411	19.4562	25.9425	3.51732e-07	0.00155411	TRUE	hyper
3	53350001	53360000	0.255197	0.489389	0.234193	-1.49257	18.2259	14.2054	0.000163903	0.0467389	TRUE	hyper
3	53370001	53380000	0.10332	0.384048	0.280728	-2.94386	19.0434	23.3619	1.34207e-06	0.0034962	TRUE	hyper
3	53390001	53400000	0.0160948	0.119204	0.103109	-2.79651	18.4331	19.459	1.02781e-05	0.0112246	TRUE	hyper
3	54070001	54080000	0.357745	0.671739	0.313993	-1.95935	17.4791	15.0655	0.000103844	0.0383604	TRUE	hyper
3	54500001	54510000	0.230344	0.580713	0.350369	-2.22643	18.1081	22.9113	1.69648e-06	0.00411911	TRUE	hyper
3	55970001	55980000	0.211246	0.511408	0.300162	-2.00698	18.6366	18.1126	2.08217e-05	0.0170171	TRUE	hyper
3	57630001	57640000	0.22494	0.454363	0.229423	-1.5347	18.6142	14.4206	0.000146192	0.0445862	TRUE	hyper
3	57900001	57910000	0.0605664	0.351257	0.29069	-2.6003	16.8068	15.6801	7.50095e-05	0.0322873	TRUE	hyper
3	59250001	59260000	0.265006	0.518057	0.25305	-1.59294	18.9241	16.8998	3.94062e-05	0.0239781	TRUE	hyper
3	65110001	65120000	0.123307	0.325501	0.202194	-1.71446	18.8959	14.9768	0.000108844	0.0392225	TRUE	hyper
3	65180001	65190000	0.145322	0.396806	0.251484	-1.96197	18.2207	16.3598	5.23858e-05	0.0280811	TRUE	hyper
3	65720001	65730000	0.0758572	0.286805	0.210948	-2.31792	17.9819	16.3684	5.21468e-05	0.0280811	TRUE	hyper
3	66040001	66050000	0.146664	0.383848	0.237184	-1.80666	18.1889	18.2452	1.94212e-05	0.0163523	TRUE	hyper
3	68540001	68550000	0.0431448	0.155035	0.11189	-2.05366	19.2914	14.5653	0.000135384	0.0431859	TRUE	hyper
3	68980001	68990000	0.278914	0.587456	0.308542	-1.80914	18.0621	15.6971	7.43383e-05	0.0322666	TRUE	hyper
3	69200001	69210000	0.0820878	0.274546	0.192458	-2.11326	18.7739	16.213	5.66029e-05	0.0289957	TRUE	hyper
3	69960001	69970000	0.147964	0.413364	0.2654	-2.23404	18.7715	17.9619	2.25376e-05	0.017522	TRUE	hyper
3	69970001	69980000	0.256169	0.557032	0.300863	-1.89346	17.6496	17.0909	3.56334e-05	0.0224469	TRUE	hyper
3	71440001	71450000	0.126891	0.314517	0.187626	-1.93556	18.0325	15.0804	0.000103027	0.0382839	TRUE	hyper
3	72150001	72160000	0.228965	0.530238	0.301273	-1.94945	18.3284	16.4985	4.8689e-05	0.0269391	TRUE	hyper
3	78910001	78920000	0.17554	0.372257	0.196717	-1.45725	19.2207	14.8531	0.00011622	0.0408216	TRUE	hyper
3	78920001	78930000	0.0908074	0.315963	0.225156	-2.1369	18.3933	18.9765	1.32339e-05	0.0130043	TRUE	hyper
3	84880001	84890000	0.0644607	0.211529	0.147068	-2.0294	18.6048	14.4068	0.000147272	0.0447042	TRUE	hyper
3	88540001	88550000	0.127966	0.316812	0.188846	-1.78702	19.9374	14.3789	0.000149464	0.0448948	TRUE	hyper
3	88830001	88840000	0.0429193	0.15678	0.11386	-2.03851	19.7922	17.5243	2.83657e-05	0.0196524	TRUE	hyper
3	98340001	98350000	0.0198834	0.123587	0.103703	-2.65614	18.9932	20.9468	4.72205e-06	0.00715711	TRUE	hyper
3	101870001	101880000	0.0504348	0.274518	0.224083	-2.70629	19.2722	13.9308	0.000189665	0.0490513	TRUE	hyper
3	101890001	101900000	0.103448	0.405326	0.301878	-2.61596	18.8571	24.384	7.89198e-07	0.00239812	TRUE	hyper
3	107680001	107690000	0.140599	0.424758	0.284159	-2.16425	18.1978	22.691	1.90257e-06	0.00441977	TRUE	hyper
3	108140001	108150000	0.0470848	0.158551	0.111466	-1.80075	20.165	15.2598	9.36909e-05	0.0362707	TRUE	hyper
3	120090001	120100000	0.32644	0.640607	0.314167	-1.86706	18.1024	18.9568	1.33709e-05	0.0130043	TRUE	hyper
3	121210001	121220000	0.062294	0.21211	0.149816	-1.98548	18.8033	14.9063	0.000112982	0.0401722	TRUE	hyper
3	121770001	121780000	0.391534	0.651322	0.259788	-1.5525	19.3429	18.8201	1.43649e-05	0.0135565	TRUE	hyper
3	122060001	122070000	0.105796	0.25782	0.152024	-1.60919	19.4361	15.8849	6.73145e-05	0.0308732	TRUE	hyper
3	126920001	126930000	0.105363	0.539512	0.434149	-3.35661	18.5405	48.1544	3.93936e-12	1.97037e-07	TRUE	hyper
3	126930001	126940000	0.0691396	0.45783	0.38869	-3.50953	18.9155	61.9332	3.55311e-15	4.44294e-10	TRUE	hyper
3	126940001	126950000	0.0454187	0.193754	0.148335	-2.22411	20.2877	20.6231	5.59172e-06	0.00791754	TRUE	hyper
3	126950001	126960000	0.132577	0.425166	0.29259	-2.29379	18.4164	27.0364	1.9966e-07	0.00101903	TRUE	hyper
3	126960001	126970000	0.116269	0.343036	0.226767	-2.03638	19.1213	17.3871	3.04881e-05	0.0205976	TRUE	hyper
3	126970001	126980000	0.117214	0.42791	0.310696	-2.23508	18.8739	25.929	3.54213e-07	0.00155411	TRUE	hyper
3	127530001	127540000	0.149296	0.379357	0.230061	-1.72786	18.7869	15.8099	7.00356e-05	0.0314808	TRUE	hyper
3	129790001	129800000	0.119675	0.324614	0.20494	-1.87496	19.278	14.9474	0.000110552	0.0396113	TRUE	hyper
3	130220001	130230000	0.266923	0.522269	0.255346	-1.55166	18.0776	14.2958	0.000156213	0.045853	TRUE	hyper
3	131330001	131340000	0.0523423	0.302442	0.250099	-3.09612	19.8167	22.7644	1.83129e-06	0.00436172	TRUE	hyper
3	135790001	135800000	0.081698	0.257867	0.176169	-1.91079	18.2518	13.9135	0.000191415	0.0493539	TRUE	hyper
3	136830001	136840000	0.0378041	0.156602	0.118797	-2.69903	19.0698	27.1673	1.86589e-07	0.000972154	TRUE	hyper
3	141630001	141640000	0.250895	0.667361	0.416466	-2.46779	16.3186	15.5737	7.93506e-05	0.0331126	TRUE	hyper
3	146090001	146100000	0.0739469	0.224656	0.150709	-1.82814	20.3789	18.5659	1.64134e-05	0.0148724	TRUE	hyper
3	149390001	149400000	0.202689	0.521948	0.319259	-2.17153	18.586	19.7941	8.62479e-06	0.0101505	TRUE	hyper
3	149400001	149410000	0.0937789	0.350823	0.257045	-2.37375	19.0474	18.4308	1.7619e-05	0.0154606	TRUE	hyper
3	153450001	153460000	0.103213	0.350788	0.247575	-2.2457	18.9716	19.0986	1.24135e-05	0.0128283	TRUE	hyper
3	153460001	153470000	0.0641819	0.363318	0.299136	-2.97305	18.2259	31.7558	1.74828e-08	0.000168162	TRUE	hyper
3	153810001	153820000	0.0414082	0.170845	0.129437	-2.23466	19.3469	21.6729	3.2333e-06	0.00621305	TRUE	hyper
4	12310001	12320000	0.384426	0.712562	0.328137	-1.89935	17.634	17.0658	3.61071e-05	0.0226882	TRUE	hyper
4	14830001	14840000	0.0155922	0.16222	0.146627	-3.0584	17.688	16.3248	5.33604e-05	0.0283928	TRUE	hyper
4	18590001	18600000	0.179861	0.539202	0.359341	-2.41354	17.0185	16.1177	5.95251e-05	0.0295953	TRUE	hyper
4	19860001	19870000	0.100497	0.294384	0.193887	-1.99434	17.9653	16.139	5.88588e-05	0.0294635	TRUE	hyper
4	25310001	25320000	0.0672794	0.284218	0.216939	-2.25057	17.2449	14.2464	0.000160367	0.0464725	TRUE	hyper
4	30890001	30900000	0.0938846	0.356467	0.262582	-2.33679	17.2277	16.308	5.38367e-05	0.0283928	TRUE	hyper
4	31340001	31350000	0.296003	0.624337	0.328334	-2.03749	17.8345	14.6083	0.000132327	0.0428115	TRUE	hyper
4	31560001	31570000	0.203297	0.422386	0.219089	-1.5159	18.6248	15.0752	0.000103312	0.0382839	TRUE	hyper
4	33220001	33230000	0.0425671	0.144488	0.101921	-2.04408	19.3161	15.4741	8.36425e-05	0.0340683	TRUE	hyper
4	33300001	33310000	0.116434	0.277046	0.160612	-1.60136	19.1436	14.7281	0.000124182	0.0416005	TRUE	hyper
4	39840001	39850000	0.262667	0.61947	0.356803	-2.34632	16.8022	14.2088	0.000163602	0.0467389	TRUE	hyper
4	41100001	41110000	0.0325206	0.163129	0.130608	-2.35947	18.8717	17.3463	3.11511e-05	0.0207746	TRUE	hyper
4	43700001	43710000	0.0329119	0.146156	0.113244	-2.49997	19.9998	18.7581	1.48393e-05	0.0138993	TRUE	hyper
4	45260001	45270000	0.0416317	0.168362	0.12673	-2.107	19.4548	15.0102	0.000106934	0.0388109	TRUE	hyper
4	45730001	45740000	0.0253643	0.16743	0.142066	-2.57155	19.6022	16.5488	4.74147e-05	0.026587	TRUE	hyper
4	46690001	46700000	0.0524613	0.156372	0.103911	-1.67751	20.1334	14.1538	0.000168458	0.0468025	TRUE	hyper
4	47890001	47900000	0.0710937	0.227151	0.156057	-1.90269	18.0064	14.041	0.000178872	0.0475858	TRUE	hyper
4	48390001	48400000	0.346607	0.589535	0.242928	-1.48763	19.3941	13.8949	0.000193327	0.0497926	TRUE	hyper
4	48510001	48520000	0.0754653	0.271887	0.196422	-2.28163	18.1763	16.704	4.3689e-05	0.0251174	TRUE	hyper
4	54000001	54010000	0.298337	0.605339	0.307001	-1.95969	18.1399	14.2599	0.000159217	0.0463003	TRUE	hyper
4	63590001	63600000	0.0707681	0.227506	0.156738	-2.00523	18.9911	20.6496	5.51474e-06	0.00788094	TRUE	hyper
4	63980001	63990000	0.107617	0.461478	0.353861	-2.76341	17.8436	17.6175	2.70086e-05	0.0190285	TRUE	hyper
4	70040001	70050000	0.114686	0.428367	0.313681	-2.4909	18.1325	16.8184	4.11328e-05	0.0243186	TRUE	hyper
4	70720001	70730000	0.058432	0.260897	0.202465	-2.40215	17.4761	15.2626	9.35485e-05	0.0362707	TRUE	hyper
4	72530001	72540000	0.152174	0.553092	0.400918	-2.73651	16.3887	17.5163	2.84856e-05	0.0196524	TRUE	hyper
4	74060001	74070000	0.0607546	0.26885	0.208096	-2.27987	17.4255	14.4735	0.000142147	0.0441603	TRUE	hyper
4	81070001	81080000	0.0792758	0.258563	0.179287	-1.98261	18.3856	14.429	0.000145545	0.044483	TRUE	hyper
4	82050001	82060000	0.158796	0.498865	0.340069	-2.36503	17.5279	17.6253	2.68979e-05	0.0190285	TRUE	hyper
4	82110001	82120000	0.208694	0.612678	0.403984	-2.61989	17.2789	22.4973	2.10435e-06	0.00474119	TRUE	hyper
4	83150001	83160000	0.236596	0.533135	0.296538	-1.88259	18.1709	17.1666	3.42402e-05	0.0220697	TRUE	hyper
4	84430001	84440000	0.29924	0.620084	0.320844	-1.9785	17.6855	16.8211	4.10737e-05	0.0243186	TRUE	hyper
4	86880001	86890000	0.103367	0.317992	0.214625	-2.16193	19.1951	18.0085	2.19917e-05	0.0173888	TRUE	hyper
4	87020001	87030000	0.204463	0.496457	0.291994	-2.0872	18.8838	14.1142	0.00017204	0.0471249	TRUE	hyper
4	87030001	87040000	0.0629569	0.237721	0.174764	-2.50045	19.3699	21.6603	3.25451e-06	0.00621305	TRUE	hyper
4	87900001	87910000	0.26628	0.591643	0.325363	-2.10354	18.0776	16.4651	4.95545e-05	0.0272972	TRUE	hyper
4	92400001	92410000	0.288277	0.61049	0.322213	-2.04374	18.8772	25.1889	5.19797e-07	0.00185706	TRUE	hyper
4	100680001	100690000	0.123576	0.347342	0.223766	-1.90449	18.1835	17.9002	2.32795e-05	0.0175833	TRUE	hyper
4	104680001	104690000	0.0594621	0.186329	0.126867	-1.8517	19.3137	14.0375	0.0001792	0.0475858	TRUE	hyper
4	104690001	104700000	0.195363	0.444167	0.248803	-1.71776	19.1222	16.0885	6.04507e-05	0.0298184	TRUE	hyper
4	107720001	107730000	0.200202	0.421458	0.221255	-1.51559	19.3413	14.2435	0.00016061	0.0464891	TRUE	hyper
4	108970001	108980000	0.0962339	0.256007	0.159773	-1.68381	18.8436	15.1915	9.71385e-05	0.0370887	TRUE	hyper
4	111700001	111710000	0.0258343	0.184432	0.158598	-2.77499	17.5475	16.7524	4.25892e-05	0.0249438	TRUE	hyper
4	112240001	112250000	0.546622	0.17911	-0.367512	2.33253	17.0621	14.7393	0.000123447	0.0414453	TRUE	hypo
4	113070001	113080000	0.0322222	0.339611	0.307389	-3.49263	16.4072	16.9427	3.85262e-05	0.0237899	TRUE	hyper
4	114580001	114590000	0.0294095	0.137612	0.108203	-2.2156	18.5363	14.6033	0.000132681	0.0428706	TRUE	hyper
4	118490001	118500000	0.0103073	0.209147	0.19884	-4.25652	18.9716	33.3079	7.86618e-09	9.36776e-05	TRUE	hyper
4	118610001	118620000	0.044692	0.203332	0.15864	-2.31289	19.6221	20.5891	5.69207e-06	0.00795259	TRUE	hyper
4	118680001	118690000	0.04296	0.181502	0.138542	-2.21612	18.3809	15.1127	0.000101278	0.0380306	TRUE	hyper
4	120700001	120710000	0.215638	0.450245	0.234608	-1.60185	20.0547	17.37	3.07637e-05	0.0206263	TRUE	hyper
4	124080001	124090000	0.219598	0.468564	0.248966	-1.73722	19.1352	14.1102	0.000172411	0.0471747	TRUE	hyper
4	126510001	126520000	0.0234957	0.154472	0.130977	-2.56027	18.6741	14.6126	0.000132026	0.0427859	TRUE	hyper
4	127290001	127300000	0.288469	0.528536	0.240068	-1.45015	18.8717	14.1308	0.000170528	0.0470197	TRUE	hyper
4	129830001	129840000	0.173481	0.423015	0.249534	-1.84715	18.5461	21.5091	3.52154e-06	0.00638183	TRUE	hyper
4	130020001	130030000	0.22841	0.436491	0.208081	-1.42167	20.0853	14.7462	0.000122997	0.0413996	TRUE	hyper
4	131070001	131080000	0.017498	0.130719	0.113221	-2.87356	18.8594	22.4269	2.18291e-06	0.00485207	TRUE	hyper
4	131450001	131460000	0.0595547	0.249198	0.189643	-2.83304	19.6645	24.2942	8.26883e-07	0.00245157	TRUE	hyper
4	133120001	133130000	0.0860382	0.270132	0.184094	-1.94472	19.4878	21.0899	4.38226e-06	0.00707062	TRUE	hyper
4	137060001	137070000	0.0296751	0.140774	0.111099	-2.31845	19.6529	16.5063	4.84898e-05	0.0269391	TRUE	hyper
4	137140001	137150000	0.119493	0.282566	0.163073	-1.55154	19.7267	17.2624	3.25558e-05	0.0214757	TRUE	hyper
4	142030001	142040000	0.173068	0.426267	0.253199	-2.22184	20.3149	15.0726	0.000103457	0.0382839	TRUE	hyper
4	145120001	145130000	0.374524	0.668276	0.293752	-1.70814	18.2346	17.8517	2.38802e-05	0.0178272	TRUE	hyper
4	145480001	145490000	0.0318883	0.142005	0.110117	-2.2509	18.7583	19.0693	1.26054e-05	0.0128706	TRUE	hyper
4	151550001	151560000	0.0643832	0.205268	0.140884	-2.02262	19.7	14.7962	0.000119778	0.0410897	TRUE	hyper
4	152650001	152660000	0.163983	0.359259	0.195276	-1.48683	19.17	15.5157	8.18221e-05	0.0335453	TRUE	hyper
4	152900001	152910000	0.054714	0.184647	0.129933	-2.07096	19.7679	17.1063	3.53447e-05	0.0224469	TRUE	hyper
4	153030001	153040000	0.0911094	0.303003	0.211893	-2.30195	19.1978	14.219	0.000162723	0.0465838	TRUE	hyper
4	153940001	153950000	0.118692	0.271372	0.15268	-1.51452	19.5579	14.7902	0.000120159	0.0410897	TRUE	hyper
5	3370001	3380000	0.0999947	0.309991	0.209997	-1.97982	18.5887	13.9629	0.000186452	0.0486228	TRUE	hyper
5	3440001	3450000	0.15996	0.376051	0.216092	-1.6024	18.723	16.058	6.14326e-05	0.0299484	TRUE	hyper
5	4530001	4540000	0.167371	0.45937	0.291998	-2.30517	18.8091	14.7777	0.000120956	0.0410897	TRUE	hyper
5	4800001	4810000	0.11608	0.34051	0.22443	-1.88276	18.7069	16.4169	5.0831e-05	0.0279389	TRUE	hyper
5	5270001	5280000	0.0805743	0.269783	0.189208	-2.06708	18.8424	21.829	2.98067e-06	0.00605125	TRUE	hyper
5	9840001	9850000	0.381715	0.674704	0.292989	-2.04632	18.4255	15.1944	9.69911e-05	0.0370887	TRUE	hyper
5	10950001	10960000	0.328254	0.0257586	-0.302495	3.40193	17.3219	21.5685	3.4142e-06	0.00631535	TRUE	hypo
5	12570001	12580000	0.273653	0.535381	0.261728	-1.65536	17.7667	14.0014	0.000182677	0.0482929	TRUE	hyper
5	19370001	19380000	0.122105	0.471098	0.348993	-2.46638	16.9316	15.2988	9.17734e-05	0.0358614	TRUE	hyper
5	20810001	20820000	0.289767	0.536701	0.246933	-1.5665	18.6677	14.8125	0.000118743	0.0409036	TRUE	hyper
5	23620001	23630000	0.16485	0.367091	0.202241	-1.65466	18.7619	15.8908	6.71046e-05	0.0308732	TRUE	hyper
5	30820001	30830000	0.0474444	0.249936	0.202491	-2.79169	19.5634	17.0989	3.54838e-05	0.0224469	TRUE	hyper
5	30860001	30870000	0.0284671	0.138743	0.110276	-2.30262	20.5927	18.2067	1.98184e-05	0.0165211	TRUE	hyper
5	31630001	31640000	0.11075	0.311008	0.200259	-1.82237	19.238	18.5166	1.68433e-05	0.0150978	TRUE	hyper
5	32050001	32060000	0.071269	0.278598	0.207329	-2.13903	18.4747	19.8626	8.32136e-06	0.0100051	TRUE	hyper
5	46710001	46720000	0.0788889	0.450957	0.372068	-2.90868	16.16	14.5315	0.000137834	0.0435265	TRUE	hyper
5	54250001	54260000	0.196602	0.433865	0.237263	-1.61711	18.1081	15.8609	6.81711e-05	0.0310758	TRUE	hyper
5	57150001	57160000	0.418413	0.139516	-0.278897	2.60239	17.0503	18.4544	1.74017e-05	0.0153679	TRUE	hypo
5	65800001	65810000	0.284262	0.565312	0.281051	-1.76159	19.3324	18.041	2.16201e-05	0.0173298	TRUE	hyper
5	66640001	66650000	0.15192	0.369705	0.217785	-1.73631	19.1399	21.8117	3.00764e-06	0.00605125	TRUE	hyper
5	67050001	67060000	0.0844094	0.271941	0.187531	-2.08439	19.6728	14.1352	0.000170126	0.0469606	TRUE	hyper
5	72210001	72220000	0.107491	0.260277	0.152786	-1.57066	19.4958	15.6738	7.52602e-05	0.0323145	TRUE	hyper
5	90770001	90780000	0.0236916	0.189605	0.165914	-2.79127	18.9747	14.946	0.00011063	0.0396113	TRUE	hyper
5	99740001	99750000	0.0489681	0.242259	0.193291	-2.84644	19.5087	18.7307	1.5054e-05	0.0140005	TRUE	hyper
5	100890001	100900000	0.00743023	0.110886	0.103455	-3.51001	18.6221	20.3472	6.45888e-06	0.00863787	TRUE	hyper
5	106500001	106510000	0.0555044	0.267716	0.212211	-2.71518	19.4156	16.1049	5.99291e-05	0.0296313	TRUE	hyper
5	107170001	107180000	0.0484233	0.236765	0.188342	-2.54796	18.8672	28.8444	7.8432e-08	0.000544856	TRUE	hyper
5	108850001	108860000	0.0978187	0.330908	0.233089	-2.0584	17.9798	16.1198	5.94592e-05	0.0295953	TRUE	hyper
5	110530001	110540000	0.264946	0.486746	0.2218	-1.40724	19.4095	14.085	0.000174735	0.0472674	TRUE	hyper
5	114840001	114850000	0.0972517	0.323638	0.226386	-2.49313	20.179	18.4198	1.77208e-05	0.0154956	TRUE	hyper
5	116650001	116660000	0.194302	0.432651	0.238348	-1.86153	19.1826	14.3586	0.000151084	0.0450886	TRUE	hyper
5	124500001	124510000	0.0695641	0.200588	0.131023	-1.71246	19.9674	14.8944	0.000113699	0.0401722	TRUE	hyper
5	126840001	126850000	0.169697	0.521741	0.352044	-2.21374	17.7998	16.5277	4.79453e-05	0.0267704	TRUE	hyper
5	135520001	135530000	0.0926236	0.223588	0.130964	-1.44974	19.6477	13.9924	0.000183549	0.0483193	TRUE	hyper
5	136260001	136270000	0.0488149	0.208334	0.15952	-2.29522	19.6651	18.8321	1.42746e-05	0.0135565	TRUE	hyper
5	136800001	136810000	0.0243243	0.148618	0.124294	-2.44737	19.9876	17.0299	3.67965e-05	0.0230058	TRUE	hyper
5	137090001	137100000	0.0353559	0.149186	0.11383	-2.13012	19.5524	16.3976	5.13495e-05	0.0279475	TRUE	hyper
5	147580001	147590000	0.143759	0.382168	0.238409	-2.32542	19.812	18.7027	1.52767e-05	0.0140978	TRUE	hyper
5	147600001	147610000	0.177503	0.49982	0.322316	-2.62355	19.5751	21.0102	4.56834e-06	0.00713967	TRUE	hyper
6	4020001	4030000	0.072518	0.263652	0.191134	-2.08397	17.8794	15.5445	8.05845e-05	0.0332079	TRUE	hyper
6	5010001	5020000	0.135324	0.452363	0.317039	-2.42048	19.3284	32.88	9.80267e-09	0.000111433	TRUE	hyper
6	5400001	5410000	0.0733431	0.269899	0.196556	-2.17033	18.7822	15.4353	8.53773e-05	0.0344565	TRUE	hyper
6	15790001	15800000	0.116999	0.304116	0.187118	-1.75644	18.6366	14.0793	0.000175265	0.0472674	TRUE	hyper
6	15920001	15930000	0.17933	0.527048	0.347718	-2.37297	17.6728	16.7605	4.24072e-05	0.0248955	TRUE	hyper
6	23220001	23230000	0.186227	0.517952	0.331725	-2.40314	18.1491	14.3483	0.00015192	0.0452301	TRUE	hyper
6	28870001	28880000	0.120797	0.284591	0.163795	-1.6101	19.3145	14.6497	0.000129456	0.0423206	TRUE	hyper
6	32400001	32410000	0.165661	0.415965	0.250304	-2.0068	19.1185	14.5698	0.000135061	0.0431379	TRUE	hyper
6	37030001	37040000	0.073744	0.275761	0.202017	-2.16238	18.9079	15.7419	7.25995e-05	0.0319737	TRUE	hyper
6	42850001	42860000	0.0675885	0.266964	0.199376	-2.61542	17.4285	14.6855	0.000127022	0.0420766	TRUE	hyper
6	46930001	46940000	0.118519	0.456913	0.338394	-2.33624	16.8115	15.8458	6.87201e-05	0.0311906	TRUE	hyper
6	53350001	53360000	0.0705449	0.311676	0.241131	-2.55909	18.1194	21.6876	3.20856e-06	0.00621305	TRUE	hyper
6	55470001	55480000	0.194704	0.423588	0.228885	-1.57743	19.6333	14.2373	0.000161148	0.0465838	TRUE	hyper
6	58740001	58750000	0.0365418	0.220967	0.184425	-2.81923	17.4585	16.2057	5.68214e-05	0.0289957	TRUE	hyper
6	67320001	67330000	0.30792	0.603903	0.295983	-1.845	18.3995	14.5181	0.000138816	0.0435585	TRUE	hyper
6	68780001	68790000	0.362251	0.0936417	-0.268609	2.5477	17.3413	15.4343	8.54223e-05	0.0344565	TRUE	hypo
6	78480001	78490000	0.38107	0.730283	0.349213	-2.15913	18.8761	25.5403	4.3323e-07	0.00173547	TRUE	hyper
6	87240001	87250000	0.0416281	0.239763	0.198134	-2.82749	19.1889	26.2213	3.04442e-07	0.00140994	TRUE	hyper
6	87250001	87260000	0.0448941	0.212585	0.167691	-2.44912	19.3137	18.3156	1.87171e-05	0.0159869	TRUE	hyper
6	90720001	90730000	0.0541367	0.176603	0.122466	-1.82598	18.7205	14.1025	0.000173118	0.0472133	TRUE	hyper
6	91270001	91280000	0.055364	0.191106	0.135742	-1.93232	19.4118	13.8794	0.000194927	0.049994	TRUE	hyper
6	98320001	98330000	0.245609	0.604566	0.358957	-2.3159	17.6625	18.946	1.34474e-05	0.0130043	TRUE	hyper
6	100900001	100910000	0.152562	0.391152	0.238589	-2.04495	19.3022	16.5005	4.86376e-05	0.0269391	TRUE	hyper
6	104380001	104390000	0.371212	0.112765	-0.258448	2.93052	16.9443	14.6694	0.000128109	0.0421557	TRUE	hypo
6	113910001	113920000	0.0685707	0.236277	0.167707	-2.04339	19.6379	14.5819	0.000134195	0.0430052	TRUE	hyper
6	114100001	114110000	0.0418989	0.212187	0.170288	-2.63082	19.6555	43.2707	4.76666e-11	1.70297e-06	TRUE	hyper
6	114110001	114120000	0.146202	0.365236	0.219034	-1.92675	18.3683	14.2769	0.000157786	0.0460984	TRUE	hyper
6	117740001	117750000	0.141377	0.393267	0.25189	-1.98924	18.3088	17.0229	3.69323e-05	0.0230331	TRUE	hyper
6	118730001	118740000	0.107789	0.449151	0.341362	-2.72796	18.9454	31.8582	1.65845e-08	0.000168162	TRUE	hyper
6	118740001	118750000	0.0625818	0.258726	0.196144	-2.59432	18.8515	28.691	8.4896e-08	0.000573821	TRUE	hyper
6	119180001	119190000	0.113179	0.288084	0.174904	-1.7703	19.15	14.167	0.00016728	0.0468025	TRUE	hyper
6	121100001	121110000	0.0468733	0.15188	0.105006	-1.94576	20.7112	19.376	1.07347e-05	0.0116723	TRUE	hyper
6	126120001	126130000	0.15546	0.440491	0.285032	-2.31416	19.0679	17.1926	3.37757e-05	0.0218265	TRUE	hyper
6	126560001	126570000	0.132132	0.381666	0.249535	-2.2384	19.2561	17.9265	2.29599e-05	0.0175466	TRUE	hyper
6	126600001	126610000	0.140396	0.313006	0.17261	-1.67828	19.4072	14.8128	0.000118728	0.0409036	TRUE	hyper
6	135020001	135030000	0.265799	0.511764	0.245966	-1.55788	19.6431	19.1946	1.18049e-05	0.0123383	TRUE	hyper
6	135510001	135520000	0.137276	0.362242	0.224966	-1.75659	18.0105	13.9535	0.000187388	0.0486491	TRUE	hyper
6	142310001	142320000	0.0537703	0.282159	0.228388	-3.00001	18.4688	24.7793	6.4285e-07	0.00206113	TRUE	hyper
6	142830001	142840000	0.128326	0.336238	0.207912	-1.84231	19.3824	14.0515	0.000177868	0.0474539	TRUE	hyper
6	142970001	142980000	0.119649	0.286943	0.167293	-1.54435	19.0785	14.9576	0.000109956	0.0395096	TRUE	hyper
6	143830001	143840000	0.22497	0.526343	0.301373	-2.03445	19.6483	15.644	7.64546e-05	0.0325771	TRUE	hyper
6	145460001	145470000	0.114723	0.30754	0.192817	-1.853	19.4921	15.7889	7.08163e-05	0.0316254	TRUE	hyper
6	147740001	147750000	0.209258	0.530678	0.321419	-2.11193	17.9422	17.253	3.27176e-05	0.0214757	TRUE	hyper
7	3350001	3360000	0.148054	0.392188	0.244133	-1.98358	19.495	15.8825	6.73986e-05	0.0308732	TRUE	hyper
7	14940001	14950000	0.0905987	0.24912	0.158521	-1.68104	18.5293	13.9726	0.000185499	0.0484753	TRUE	hyper
7	17610001	17620000	0.0863761	0.285764	0.199388	-1.98528	18.7254	14.0841	0.000174813	0.0472674	TRUE	hyper
7	17940001	17950000	0.327781	0.647379	0.319598	-1.89044	17.3762	16.8318	4.0843e-05	0.0243186	TRUE	hyper
7	26950001	26960000	0.261634	0.506925	0.245291	-1.55371	18.6969	15.0075	0.000107086	0.0388109	TRUE	hyper
7	30750001	30760000	0.263053	0.474993	0.21194	-1.31343	19.1835	15.672	7.53311e-05	0.0323145	TRUE	hyper
7	36080001	36090000	0.0316158	0.211849	0.180233	-2.85194	19.1808	23.5885	1.19298e-06	0.00320804	TRUE	hyper
7	36100001	36110000	0.146176	0.395247	0.249071	-1.91648	19.1043	15.3804	8.7896e-05	0.0348759	TRUE	hyper
7	36120001	36130000	0.0596073	0.193384	0.133777	-1.83938	19.0285	14.1866	0.000165543	0.0468025	TRUE	hyper
7	36130001	36140000	0.0736607	0.223166	0.149506	-1.93862	19.3227	14.775	0.000121133	0.0410897	TRUE	hyper
7	36170001	36180000	0.121701	0.346009	0.224307	-1.90848	18.5696	19.2251	1.16173e-05	0.0122588	TRUE	hyper
7	36190001	36200000	0.138628	0.364193	0.225565	-1.81336	19.5101	20.0373	7.59465e-06	0.00959255	TRUE	hyper
7	36200001	36210000	0.212948	0.529625	0.316677	-2.10698	18.6444	19.2624	1.1393e-05	0.0121244	TRUE	hyper
7	36210001	36220000	0.159091	0.442421	0.28333	-2.10408	17.6444	15.7248	7.32583e-05	0.0319737	TRUE	hyper
7	37070001	37080000	0.072704	0.219088	0.146384	-1.75177	18.5108	14.5345	0.000137617	0.0435265	TRUE	hyper
7	39760001	39770000	0.174975	0.41236	0.237385	-1.69068	18.5433	18.4489	1.74519e-05	0.0153679	TRUE	hyper
7	43730001	43740000	0.077317	0.253149	0.175832	-2.00551	18.2654	14.4148	0.000146641	0.0446688	TRUE	hyper
7	44960001	44970000	0.247131	0.417291	0.17016	-1.13368	20.3288	14.4614	0.000143062	0.044247	TRUE	hyper
7	47760001	47770000	0.396826	0.148745	-0.248081	1.96153	17.8794	14.4871	0.000141122	0.0439512	TRUE	hypo
7	56550001	56560000	0.048929	0.211288	0.162359	-2.34064	18.3364	20.3513	6.44499e-06	0.00863787	TRUE	hyper
7	64840001	64850000	0.132753	0.329256	0.196503	-1.69936	19.2285	16.5929	4.63252e-05	0.026152	TRUE	hyper
7	65200001	65210000	0.23062	0.489405	0.258785	-1.75207	19.5579	15.1251	0.000100617	0.0378393	TRUE	hyper
7	65210001	65220000	0.178181	0.456499	0.278318	-2.1156	19.2163	20.405	6.26664e-06	0.00851742	TRUE	hyper
7	71270001	71280000	0.208408	0.51533	0.306922	-2.03027	18.0064	17.4685	2.92103e-05	0.0199593	TRUE	hyper
7	77850001	77860000	0.189495	0.494128	0.304633	-2.03981	17.5586	14.1477	0.000169007	0.0468067	TRUE	hyper
7	91200001	91210000	0.0816017	0.394402	0.312801	-2.80143	16.7595	18.1658	2.02485e-05	0.0168235	TRUE	hyper
7	96970001	96980000	0.266745	0.527095	0.26035	-1.64975	18.9273	15.2424	9.45563e-05	0.0365491	TRUE	hyper
7	100560001	100570000	0.188961	0.384405	0.195443	-1.43158	18.781	14.2821	0.000157353	0.0460258	TRUE	hyper
7	101600001	101610000	0.0785694	0.297936	0.219367	-2.27473	18.2084	21.0426	4.49182e-06	0.00710979	TRUE	hyper
7	101960001	101970000	0.0750923	0.200579	0.125487	-1.61019	19.0805	14.8023	0.00011939	0.0410137	TRUE	hyper
7	112560001	112570000	0.0274915	0.168226	0.140734	-2.6976	18.8356	22.4186	2.19237e-06	0.00485207	TRUE	hyper
7	112660001	112670000	0.155888	0.36568	0.209793	-1.70455	18.7643	14.8371	0.000117207	0.0408782	TRUE	hyper
7	112810001	112820000	0.0190027	0.128015	0.109012	-2.43195	19.0395	14.168	0.000167187	0.0468025	TRUE	hyper
7	114770001	114780000	0.0441195	0.165529	0.121409	-2.06658	18.586	15.3656	8.85855e-05	0.0350539	TRUE	hyper
7	122370001	122380000	0.150221	0.395384	0.245163	-1.88848	18.8161	16.0795	6.07378e-05	0.0299011	TRUE	hyper
7	122420001	122430000	0.207307	0.473191	0.265884	-1.82199	18.856	19.9783	7.83254e-06	0.0097797	TRUE	hyper
7	122450001	122460000	0.184127	0.487413	0.303286	-2.34362	19.427	18.1234	2.07043e-05	0.017014	TRUE	hyper
7	130250001	130260000	0.14929	0.353726	0.204436	-1.56847	19.1546	14.0749	0.000175675	0.0472674	TRUE	hyper
7	130550001	130560000	0.0693314	0.194351	0.125019	-2.0105	19.1454	14.3139	0.000154717	0.045682	TRUE	hyper
7	131670001	131680000	0.055569	0.186832	0.131263	-2.04066	18.9716	15.0109	0.000106893	0.0388109	TRUE	hyper
7	133360001	133370000	0.148237	0.36482	0.216583	-1.81189	19.179	14.8156	0.000118549	0.0409036	TRUE	hyper
7	140990001	141000000	0.0610388	0.211227	0.150188	-1.95288	19.3071	15.0195	0.000106409	0.0387357	TRUE	hyper
7	144260001	144270000	0.253522	0.489987	0.236465	-1.52335	19.0853	16.8303	4.0876e-05	0.0243186	TRUE	hyper
8	9130001	9140000	0.0337866	0.148304	0.114518	-2.16567	18.6483	14.0221	0.000180673	0.0478643	TRUE	hyper
8	12500001	12510000	0.026	0.153691	0.127691	-2.57572	20.1902	17.8883	2.34259e-05	0.0175833	TRUE	hyper
8	12770001	12780000	0.128276	0.294059	0.165783	-1.4953	19.5087	14.0782	0.00017536	0.0472674	TRUE	hyper
8	12990001	13000000	0.0388906	0.283453	0.244562	-3.30517	20.0708	30.9072	2.70666e-08	0.00024175	TRUE	hyper
8	16870001	16880000	0.202999	0.534305	0.331306	-2.16105	17.6048	15.5592	7.9961e-05	0.0331126	TRUE	hyper
8	20420001	20430000	0.100623	0.238031	0.137408	-1.6791	21.1479	14.0708	0.000176053	0.0472702	TRUE	hyper
8	24580001	24590000	0.319997	0.605626	0.285629	-1.70601	18.7822	14.2235	0.00016233	0.0465838	TRUE	hyper
8	34100001	34110000	0.0769343	0.215663	0.138729	-1.85351	20.16	17.796	2.45901e-05	0.0181752	TRUE	hyper
8	39520001	39530000	0.302895	0.707287	0.404392	-2.47711	17.8458	25.4471	4.54692e-07	0.00174942	TRUE	hyper
8	40180001	40190000	0.220703	0.499295	0.278592	-1.87822	18.2154	13.8755	0.000195327	0.049994	TRUE	hyper
8	45310001	45320000	0.147695	0.401209	0.253514	-1.97202	18.2484	19.3103	1.11104e-05	0.0119252	TRUE	hyper
8	46790001	46800000	0.0415954	0.186472	0.144876	-2.46538	18.7156	22.055	2.64954e-06	0.00567779	TRUE	hyper
8	48220001	48230000	0.0294698	0.177644	0.148174	-2.72226	20.9147	28.0108	1.20643e-07	0.00074613	TRUE	hyper
8	48230001	48240000	0.0869223	0.372473	0.28555	-2.66783	20.4076	19.0226	1.29176e-05	0.0128706	TRUE	hyper
8	57770001	57780000	0.0346074	0.17187	0.137262	-2.47908	18.6804	20.8146	5.05947e-06	0.00748703	TRUE	hyper
8	63370001	63380000	0.0725199	0.278361	0.205842	-2.1838	17.7619	14.9006	0.00011333	0.0401722	TRUE	hyper
8	77150001	77160000	0.0942165	0.284205	0.189988	-2.03739	18.7205	14.6273	0.000131005	0.0426597	TRUE	hyper
8	78170001	78180000	0.0518886	0.294989	0.2431	-2.73825	18.4376	25.4169	4.61846e-07	0.00175002	TRUE	hyper
8	83130001	83140000	0.0505381	0.186425	0.135887	-1.99748	18.3219	14.0818	0.000175031	0.0472674	TRUE	hyper
8	83210001	83220000	0.0652765	0.222684	0.157408	-2.08692	19.1889	14.8247	0.00011798	0.0408782	TRUE	hyper
8	86490001	86500000	0.0283381	0.142352	0.114014	-2.43574	18.6168	16.5273	4.79558e-05	0.0267704	TRUE	hyper
8	92540001	92550000	0.0585728	0.186658	0.128085	-1.80018	18.518	14.6375	0.000130293	0.0425119	TRUE	hyper
8	99230001	99240000	0.206448	0.609699	0.403251	-2.44545	17.3153	16.2435	5.56998e-05	0.0287806	TRUE	hyper
8	99750001	99760000	0.262083	0.643222	0.381139	-2.28028	17.0853	19.7854	8.66433e-06	0.0101505	TRUE	hyper
8	102020001	102030000	0.253922	0.61047	0.356549	-2.14406	16.8161	14.8047	0.000119241	0.0410137	TRUE	hyper
8	104200001	104210000	0.0232207	0.149819	0.126598	-2.69557	18.8794	15.8312	6.92504e-05	0.0313241	TRUE	hyper
8	109200001	109210000	0.350106	0.609063	0.258956	-1.54957	18.9611	15.0323	0.000105688	0.0386516	TRUE	hyper
8	112150001	112160000	0.24403	0.524021	0.279992	-1.78925	18.6353	21.5572	3.43435e-06	0.00631535	TRUE	hyper
8	112170001	112180000	0.191381	0.46903	0.277649	-1.94724	19.3348	19.8679	8.29833e-06	0.0100051	TRUE	hyper
8	112180001	112190000	0.191244	0.567782	0.376538	-2.49385	17.7377	24.9092	6.00935e-07	0.00200381	TRUE	hyper
8	112190001	112200000	0.103029	0.377379	0.27435	-2.43201	18.9549	16.7087	4.35813e-05	0.0251132	TRUE	hyper
8	117140001	117150000	0.0854705	0.252667	0.167196	-1.79774	19.3022	20.7289	5.29112e-06	0.00769326	TRUE	hyper
8	117670001	117680000	0.0701759	0.203009	0.132833	-1.84792	19.4986	18.5457	1.65882e-05	0.0149226	TRUE	hyper
8	119990001	120000000	0.0760509	0.27629	0.200239	-2.75932	20.4536	15.2763	9.2875e-05	0.0361226	TRUE	hyper
8	123380001	123390000	0.294901	0.489325	0.194424	-1.19401	20.0963	16.2538	5.53997e-05	0.0287443	TRUE	hyper
9	5570001	5580000	0.117212	0.380959	0.263747	-2.37032	17.7304	21.1281	4.2958e-06	0.00698947	TRUE	hyper
9	7450001	7460000	0.032816	0.189326	0.15651	-3.08604	17.7499	21.8942	2.881e-06	0.00600417	TRUE	hyper
9	7500001	7510000	0.0419399	0.175234	0.133294	-2.16949	18.3005	15.055	0.000104422	0.0384526	TRUE	hyper
9	11490001	11500000	0.252187	0.669714	0.417528	-2.55791	17.373	21.5225	3.49701e-06	0.00638183	TRUE	hyper
9	11900001	11910000	0.139741	0.494665	0.354923	-2.45918	16.8616	15.3086	9.12984e-05	0.0357877	TRUE	hyper
9	13440001	13450000	0.074969	0.287889	0.21292	-2.3061	18.5489	19.8751	8.26683e-06	0.0100051	TRUE	hyper
9	14390001	14400000	0.0404689	0.141905	0.101436	-1.92555	18.5887	14.118	0.000171694	0.0470816	TRUE	hyper
9	14490001	14500000	0.0894184	0.291983	0.202565	-2.05005	18.1709	13.9428	0.000188459	0.04879	TRUE	hyper
9	15560001	15570000	0.0857528	0.272546	0.186793	-2.13492	18.5641	15.7144	7.3661e-05	0.0320935	TRUE	hyper
9	25020001	25030000	0.160968	0.406837	0.245869	-1.82843	18.2119	17.7581	2.50845e-05	0.0182363	TRUE	hyper
9	27250001	27260000	0.0811158	0.251973	0.170858	-1.90183	18.688	16.1391	5.88548e-05	0.0294635	TRUE	hyper
9	31070001	31080000	0.183688	0.441416	0.257728	-1.98438	18.8492	16.0265	6.24616e-05	0.0302305	TRUE	hyper
9	32320001	32330000	0.131193	0.39007	0.258878	-2.17276	19.2931	24.9791	5.79566e-07	0.00197942	TRUE	hyper
9	32610001	32620000	0.0748631	0.325879	0.251016	-2.52805	19.3055	25.3346	4.81978e-07	0.00179905	TRUE	hyper
9	32630001	32640000	0.0465501	0.220023	0.173473	-2.59953	18.7205	23.3944	1.31965e-06	0.00347396	TRUE	hyper
9	32650001	32660000	0.076433	0.266008	0.189575	-2.04785	18.4225	15.3297	9.02862e-05	0.0356142	TRUE	hyper
9	32660001	32670000	0.0446604	0.152342	0.107682	-1.84895	18.8219	14.4916	0.000140789	0.043902	TRUE	hyper
9	32730001	32740000	0.052468	0.270721	0.218253	-2.59012	19.632	15.5753	7.92822e-05	0.0331126	TRUE	hyper
9	32740001	32750000	0.0850014	0.293149	0.208147	-2.04149	19.5123	15.7317	7.29921e-05	0.0319737	TRUE	hyper
9	35180001	35190000	0.0957654	0.27672	0.180954	-1.78722	19.8373	17.6669	2.63163e-05	0.0188288	TRUE	hyper
9	35450001	35460000	0.172763	0.384855	0.212092	-1.66409	19.2329	14.8339	0.000117408	0.0408782	TRUE	hyper
9	41590001	41600000	0.208718	0.480409	0.271691	-1.91164	18.7389	14.1211	0.000171412	0.0470816	TRUE	hyper
9	42580001	42590000	0.23743	0.518212	0.280782	-1.98126	19.384	17.3732	3.0713e-05	0.0206263	TRUE	hyper
9	43930001	43940000	0.0324385	0.143799	0.11136	-2.24335	19.6274	17.8446	2.39693e-05	0.0178405	TRUE	hyper
9	45600001	45610000	0.0358567	0.144997	0.10914	-2.08732	19.1826	16.3986	5.1322e-05	0.0279475	TRUE	hyper
9	47230001	47240000	0.122145	0.314418	0.192273	-1.72328	18.8515	13.9901	0.00018378	0.048323	TRUE	hyper
9	50300001	50310000	0.0335745	0.179901	0.146326	-2.5042	18.5517	14.1757	0.000166505	0.0468025	TRUE	hyper
9	51060001	51070000	0.085631	0.256867	0.171236	-1.83235	18.5363	13.9696	0.000185789	0.0485004	TRUE	hyper
9	56490001	56500000	0.0791903	0.217422	0.138231	-1.69645	18.9942	14.7773	0.000120985	0.0410897	TRUE	hyper
9	58380001	58390000	0.0325072	0.155046	0.122539	-2.23193	18.8161	16.5174	4.82055e-05	0.0268498	TRUE	hyper
9	68660001	68670000	0.203579	0.47718	0.273601	-1.91048	19.0454	16.8599	4.02438e-05	0.0241552	TRUE	hyper
9	75420001	75430000	0.110545	0.292873	0.182328	-1.79026	19.1213	16.5745	4.6776e-05	0.0262878	TRUE	hyper
9	87700001	87710000	0.114496	0.362306	0.247811	-2.1093	18.1835	17.3007	3.19063e-05	0.021117	TRUE	hyper
9	94910001	94920000	0.127162	0.550818	0.423656	-3.06606	17.8549	37.3215	1.00175e-09	1.78946e-05	TRUE	hyper
9	94930001	94940000	0.164069	0.516721	0.352653	-2.4757	18.3202	17.972	2.24177e-05	0.017522	TRUE	hyper
9	94990001	95000000	0.284735	0.626254	0.341519	-2.08519	18.11	15.489	8.2988e-05	0.0339121	TRUE	hyper
9	95610001	95620000	0.3232	0.103191	-0.22001	2.1003	19.0843	19.0293	1.2873e-05	0.0128706	TRUE	hypo
9	102180001	102190000	0.0124902	0.192589	0.180099	-3.82276	19.0996	28.205	1.09124e-07	0.000699758	TRUE	hyper
9	102190001	102200000	0.0263147	0.292171	0.265856	-3.66833	19.5771	28.4285	9.7222e-08	0.000639841	TRUE	hyper
9	102220001	102230000	0.221205	0.508965	0.28776	-1.86403	18.7595	16.065	6.12033e-05	0.0299484	TRUE	hyper
9	102240001	102250000	0.0918176	0.431966	0.340148	-3.09763	19.5194	34.9384	3.40302e-09	4.72807e-05	TRUE	hyper
9	102250001	102260000	0.178283	0.464624	0.286342	-2.01641	19.6587	24.1291	9.00896e-07	0.00261979	TRUE	hyper
9	102260001	102270000	0.0369987	0.168451	0.131452	-2.27153	19.6048	17.5101	2.85788e-05	0.0196524	TRUE	hyper
9	105370001	105380000	0.210716	0.445058	0.234342	-1.65633	18.8526	14.0946	0.000173842	0.0472674	TRUE	hyper
9	106270001	106280000	0.0957235	0.257515	0.161791	-1.68312	19.1426	14.0867	0.000174571	0.0472674	TRUE	hyper
9	108450001	108460000	0.0628686	0.181642	0.118774	-1.70898	20.2658	18.2712	1.91583e-05	0.0161866	TRUE	hyper
9	110870001	110880000	0.236428	0.0876406	-0.148788	1.6881	20.2198	18.6521	1.56878e-05	0.0143186	TRUE	hypo
9	111300001	111310000	0.0458448	0.155219	0.109374	-2.04373	18.6234	13.9879	0.000183991	0.048323	TRUE	hyper
9	111570001	111580000	0.0354386	0.226345	0.190906	-2.76786	18.6753	15.1445	9.95864e-05	0.0377353	TRUE	hyper
9	114540001	114550000	0.068523	0.221768	0.153245	-2.05907	19.7383	18.9614	1.33388e-05	0.0130043	TRUE	hyper
9	115620001	115630000	0.0790784	0.262499	0.183421	-1.96979	19.7254	15.9138	6.62952e-05	0.0308732	TRUE	hyper
9	115630001	115640000	0.075248	0.432538	0.35729	-3.19738	19.2475	50.559	1.15633e-12	7.22956e-08	TRUE	hyper
9	115640001	115650000	0.118493	0.398448	0.279955	-2.25276	19.4769	23.8641	1.03382e-06	0.00290501	TRUE	hyper
9	115650001	115660000	0.138804	0.38372	0.244916	-1.91624	19.1472	16.3873	5.16291e-05	0.0279475	TRUE	hyper
9	115660001	115670000	0.16065	0.428348	0.267698	-2.02039	18.3995	21.2864	3.95534e-06	0.0068624	TRUE	hyper
9	115670001	115680000	0.188852	0.47779	0.288938	-2.00307	18.9198	20.797	5.10625e-06	0.0075118	TRUE	hyper
9	115680001	115690000	0.051086	0.328637	0.277551	-3.05208	19.0405	40.8545	1.63995e-10	4.04934e-06	TRUE	hyper
9	115940001	115950000	0.0537993	0.445592	0.391792	-3.80422	19.2578	66.7166	3.13483e-16	7.83981e-11	TRUE	hyper
9	115950001	115960000	0.0825818	0.410421	0.327839	-3.05874	19.5551	40.9205	1.58549e-10	4.04934e-06	TRUE	hyper
9	115960001	115970000	0.0998425	0.537443	0.4376	-3.45661	18.938	54.9197	1.25558e-13	1.04668e-08	TRUE	hyper
9	115970001	115980000	0.192381	0.435038	0.242657	-1.68646	19.421	19.4917	1.01037e-05	0.0110825	TRUE	hyper
9	115980001	115990000	0.28651	0.646457	0.359948	-2.27766	19.2119	27.9374	1.25306e-07	0.00074613	TRUE	hyper
9	115990001	116000000	0.212223	0.543447	0.331224	-2.26278	19.5489	30.4285	3.46399e-08	0.000288766	TRUE	hyper
9	116000001	116010000	0.236861	0.619673	0.382812	-2.44342	18.8368	35.8633	2.11662e-09	3.52893e-05	TRUE	hyper
9	116010001	116020000	0.184451	0.639174	0.454723	-3.12419	18.8728	40.6932	1.78109e-10	4.04934e-06	TRUE	hyper
9	116030001	116040000	0.137547	0.492113	0.354566	-2.72421	18.8627	38.2079	6.35946e-10	1.2234e-05	TRUE	hyper
9	116040001	116050000	0.222251	0.502463	0.280212	-1.84681	18.3793	15.0456	0.000104945	0.0385394	TRUE	hyper
9	116050001	116060000	0.208049	0.527073	0.319024	-2.24113	19.0552	17.9133	2.31196e-05	0.0175466	TRUE	hyper
9	116060001	116070000	0.205162	0.4455	0.240338	-1.76154	19.6638	14.8364	0.000117251	0.0408782	TRUE	hyper
9	120140001	120150000	0.0838744	0.249309	0.165435	-1.93733	18.9176	18.3723	1.81676e-05	0.0156133	TRUE	hyper
9	120480001	120490000	0.108728	0.303742	0.195014	-2.08398	19.8045	14.2008	0.000164303	0.0467996	TRUE	hyper
10	7840001	7850000	0.0305721	0.132904	0.102332	-2.27962	19.4087	15.1814	9.76632e-05	0.0372321	TRUE	hyper
10	8380001	8390000	0.0900238	0.329937	0.239913	-2.18799	18.6155	16.123	5.936e-05	0.0295953	TRUE	hyper
10	11990001	12000000	0.173638	0.5714	0.397762	-2.59258	17.2518	20.2496	6.79672e-06	0.00894617	TRUE	hyper
10	13210001	13220000	0.0903787	0.334967	0.244588	-2.77483	19.2688	20.2639	6.74622e-06	0.00892668	TRUE	hyper
10	16140001	16150000	0.222944	0.0423328	-0.180611	2.51667	17.3572	14.2211	0.00016254	0.0465838	TRUE	hypo
10	20160001	20170000	0.273839	0.514094	0.240255	-1.50227	19.2612	16.0492	6.17169e-05	0.0300284	TRUE	hyper
10	34340001	34350000	0.338156	0.714962	0.376806	-2.2222	17.8022	21.2899	3.94806e-06	0.0068624	TRUE	hyper
10	41940001	41950000	0.20921	0.466149	0.256939	-1.87649	19.298	14.6885	0.000126817	0.0420766	TRUE	hyper
10	41960001	41970000	0.0811982	0.264518	0.183319	-2.23609	19.3628	14.1403	0.00016967	0.0469384	TRUE	hyper
10	44930001	44940000	0.0134576	0.146903	0.133445	-3.31295	18.0105	18.667	1.55653e-05	0.0143113	TRUE	hyper
10	53120001	53130000	0.18881	0.516441	0.327631	-2.2872	16.8926	14.7575	0.000122263	0.0412081	TRUE	hyper
10	53730001	53740000	0.131796	0.409433	0.277637	-2.16646	18.7951	20.1108	7.30831e-06	0.00932507	TRUE	hyper
10	59550001	59560000	0.106196	0.283495	0.177298	-1.96122	19.0747	14.9777	0.000108791	0.0392225	TRUE	hyper
10	59560001	59570000	0.100408	0.357076	0.256668	-2.36282	19.1399	30.7004	3.01103e-08	0.000259662	TRUE	hyper
10	59590001	59600000	0.117989	0.351341	0.233351	-2.01932	19.7529	16.6465	4.50324e-05	0.0255375	TRUE	hyper
10	59600001	59610000	0.0870698	0.273802	0.186732	-1.86037	19.4398	15.5629	7.98064e-05	0.0331126	TRUE	hyper
10	61730001	61740000	0.0507577	0.21026	0.159502	-2.3311	20.1623	21.2896	3.94866e-06	0.0068624	TRUE	hyper
10	63690001	63700000	0.235185	0.492547	0.257362	-1.6285	18.1024	14.333	0.000153154	0.0453692	TRUE	hyper
10	64060001	64070000	0.33368	0.61915	0.28547	-1.76688	18.5391	13.9808	0.000184691	0.0483607	TRUE	hyper
10	67320001	67330000	0.0364628	0.158664	0.122201	-2.09043	19.9252	14.1897	0.000165274	0.0468025	TRUE	hyper
10	67440001	67450000	0.258479	0.509363	0.250884	-1.58698	18.5349	14.4466	0.000144188	0.0443544	TRUE	hyper
10	69760001	69770000	0.131355	0.291951	0.160596	-1.42378	18.9464	14.7654	0.000121748	0.041201	TRUE	hyper
10	70910001	70920000	0.0516847	0.228281	0.176596	-2.43763	18.3777	17.6174	2.7011e-05	0.0190285	TRUE	hyper
10	71260001	71270000	0.0747361	0.226475	0.151738	-2.08239	19.6188	15.804	7.0255e-05	0.0314808	TRUE	hyper
10	71390001	71400000	0.0595949	0.228878	0.169284	-2.15758	18.7727	19.4954	1.0084e-05	0.0110825	TRUE	hyper
10	71820001	71830000	0.347264	0.701386	0.354122	-2.22109	18.3604	21.1448	4.25859e-06	0.00698947	TRUE	hyper
10	72030001	72040000	0.274157	0.599545	0.325388	-2.21118	17.7499	16.2084	5.67414e-05	0.0289957	TRUE	hyper
10	72090001	72100000	0.252565	0.576512	0.323947	-2.05032	17.8882	16.3579	5.24372e-05	0.0280811	TRUE	hyper
10	75570001	75580000	0.0849263	0.233609	0.148682	-1.69043	19.812	17.4262	2.98684e-05	0.02025	TRUE	hyper
10	75810001	75820000	0.186118	0.446446	0.260327	-1.99929	19.0345	15.9982	6.34035e-05	0.0304292	TRUE	hyper
10	82030001	82040000	0.202898	0.472963	0.270066	-1.76237	18.0795	14.6505	0.0001294	0.0423206	TRUE	hyper
10	83530001	83540000	0.0521128	0.2169	0.164787	-2.25825	19.8855	18.4066	1.78441e-05	0.0155491	TRUE	hyper
10	89570001	89580000	0.213124	0.45556	0.242436	-1.67583	18.6522	15.4012	8.69324e-05	0.0347087	TRUE	hyper
10	89580001	89590000	0.206527	0.505523	0.298996	-2.23772	18.6115	16.8911	3.95868e-05	0.023981	TRUE	hyper
10	93660001	93670000	0.310213	0.535022	0.224808	-1.41564	18.8056	14.0785	0.000175338	0.0472674	TRUE	hyper
10	95700001	95710000	0.101162	0.312851	0.211688	-2.20308	19.5799	15.5675	7.961e-05	0.0331126	TRUE	hyper
10	95790001	95800000	0.37296	0.629488	0.256528	-1.50157	19.0728	15.9821	6.39454e-05	0.030503	TRUE	hyper
10	97390001	97400000	0.0803117	0.32974	0.249428	-2.30555	16.9316	13.9217	0.000190583	0.049238	TRUE	hyper
10	97710001	97720000	0.221409	0.560801	0.339392	-2.23044	18.0814	19.8341	8.44627e-06	0.0100586	TRUE	hyper
10	98640001	98650000	0.219409	0.644913	0.425503	-2.53346	17.7904	22.5337	2.06489e-06	0.00469456	TRUE	hyper
10	105400001	105410000	0.309771	0.676234	0.366464	-2.44792	18.398	16.262	5.516e-05	0.0286794	TRUE	hyper
10	105450001	105460000	0.389879	0.700139	0.31026	-1.89213	17.8794	14.1732	0.000166728	0.0468025	TRUE	hyper
10	105510001	105520000	0.310847	0.623609	0.312762	-1.84978	18.2956	15.1001	0.000101956	0.038193	TRUE	hyper
10	108360001	108370000	0.151177	0.364647	0.213471	-1.69711	19.4118	15.2269	9.53345e-05	0.0367364	TRUE	hyper
10	108480001	108490000	0.216388	0.471919	0.255531	-1.74705	19.391	18.0042	2.20413e-05	0.0173888	TRUE	hyper
10	108490001	108500000	0.110289	0.278306	0.168017	-1.79644	19.2475	13.9598	0.000186765	0.0486345	TRUE	hyper
10	111750001	111760000	0.284654	0.536542	0.251888	-1.55515	18.9632	19.7806	8.68579e-06	0.0101505	TRUE	hyper
10	114150001	114160000	0.16561	0.520029	0.354419	-2.37297	17.2789	16.4075	5.10836e-05	0.0279475	TRUE	hyper
10	115060001	115070000	0.120442	0.341274	0.220832	-1.83567	18.5022	16.2958	5.41833e-05	0.0284079	TRUE	hyper
10	115780001	115790000	0.140711	0.35472	0.21401	-1.98128	18.9798	16.2031	5.69009e-05	0.0289957	TRUE	hyper
10	116760001	116770000	0.0484257	0.203159	0.154733	-2.404	19.6842	16.0085	6.3058e-05	0.0303447	TRUE	hyper
10	116790001	116800000	0.0786571	0.30118	0.222522	-2.49624	18.986	17.0992	3.5478e-05	0.0224469	TRUE	hyper
10	118190001	118200000	0.0902927	0.28172	0.191428	-1.96049	19.2629	15.6666	7.5546e-05	0.0323511	TRUE	hyper
10	118540001	118550000	0.136197	0.366198	0.230001	-1.88702	18.1889	15.62	7.74314e-05	0.0327105	TRUE	hyper
10	119050001	119060000	0.13371	0.339393	0.205684	-2.05957	19.7928	15.0938	0.000102297	0.0382038	TRUE	hyper
11	6980001	6990000	0.221053	0.565557	0.344504	-2.39732	18.5293	21.387	3.75305e-06	0.0067042	TRUE	hyper
11	6990001	7000000	0.0932351	0.399802	0.306567	-3.68077	19.3824	29.487	5.62938e-08	0.000439949	TRUE	hyper
11	7000001	7010000	0.186741	0.439281	0.25254	-1.89152	18.734	15.4567	8.44187e-05	0.0342728	TRUE	hyper
11	12400001	12410000	0.221612	0.610391	0.388779	-2.52676	18.2049	27.5832	1.50484e-07	0.000836313	TRUE	hyper
11	12410001	12420000	0.219696	0.519773	0.300077	-2.04437	17.3572	14.339	0.000152668	0.0453446	TRUE	hyper
11	12420001	12430000	0.264038	0.585177	0.321139	-2.14422	18.4805	20.4832	6.01585e-06	0.00831208	TRUE	hyper
11	12430001	12440000	0.151863	0.477411	0.325547	-2.60003	18.4164	22.7758	1.82042e-06	0.00436172	TRUE	hyper
11	12440001	12450000	0.21675	0.548861	0.332111	-2.29166	18.3153	23.0815	1.5528e-06	0.00388336	TRUE	hyper
11	16530001	16540000	0.0153846	0.181626	0.166241	-3.25535	17.0891	15.0048	0.000107236	0.0388109	TRUE	hyper
11	20490001	20500000	0.0907056	0.251716	0.161011	-1.7205	18.4761	14.152	0.000168619	0.0468025	TRUE	hyper
11	22010001	22020000	0.32117	0.588143	0.266972	-1.60922	18.0044	14.9446	0.000110715	0.0396113	TRUE	hyper
11	22810001	22820000	0.0796901	0.238592	0.158902	-1.89462	18.3824	14.372	0.000150015	0.0448948	TRUE	hyper
11	23490001	23500000	0.0443966	0.145696	0.1013	-1.80333	20.3902	19.7893	8.64654e-06	0.0101505	TRUE	hyper
11	23790001	23800000	0.0510865	0.233174	0.182088	-2.53504	18.0601	20.8996	4.84001e-06	0.00727999	TRUE	hyper
11	24460001	24470000	0.236318	0.537274	0.300956	-2.20861	18.3348	15.0317	0.000105718	0.0386516	TRUE	hyper
11	29620001	29630000	0.0874433	0.286945	0.199501	-2.07319	18.5307	19.5469	9.81613e-06	0.0109593	TRUE	hyper
11	29650001	29660000	0.092538	0.330382	0.237844	-2.11707	18.066	18.3784	1.81096e-05	0.0156133	TRUE	hyper
11	30050001	30060000	0.0718685	0.225875	0.154007	-1.83267	19.5551	18.1192	2.07499e-05	0.017014	TRUE	hyper
11	31640001	31650000	0.0633735	0.229303	0.165929	-2.20668	18.8627	15.5705	7.94871e-05	0.0331126	TRUE	hyper
11	44630001	44640000	0.0662717	0.231711	0.165439	-2.03967	18.6741	15.2898	9.22138e-05	0.0359773	TRUE	hyper
11	46590001	46600000	0.052633	0.232796	0.180163	-2.34754	17.897	17.7692	2.49389e-05	0.0182363	TRUE	hyper
11	54410001	54420000	0.306993	0.595243	0.28825	-1.72518	17.6522	13.9134	0.000191427	0.0493539	TRUE	hyper
11	62200001	62210000	0.0727198	0.219145	0.146425	-1.85588	18.6379	15.8308	6.92649e-05	0.0313241	TRUE	hyper
11	63310001	63320000	0.0726727	0.202571	0.129898	-1.62464	19.0958	15.2853	9.24325e-05	0.0360065	TRUE	hyper
11	63460001	63470000	0.112911	0.363168	0.250256	-2.18015	18.939	25.5385	4.33652e-07	0.00173547	TRUE	hyper
11	63700001	63710000	0.0375184	0.154596	0.117078	-2.15863	18.7118	16.1041	5.99529e-05	0.0296313	TRUE	hyper
11	65190001	65200000	0.0345145	0.195049	0.160534	-2.57208	18.2207	17.2076	3.35087e-05	0.0217101	TRUE	hyper
11	67660001	67670000	0.0432458	0.235348	0.192102	-2.67484	19.321	27.9799	1.22581e-07	0.00074613	TRUE	hyper
11	67680001	67690000	0.0661502	0.232852	0.166702	-2.18528	19.3588	15.9945	6.35259e-05	0.0304292	TRUE	hyper
11	69960001	69970000	0.182178	0.0470502	-0.135127	2.79778	20.7754	19.9253	8.05292e-06	0.00987221	TRUE	hypo
11	74700001	74710000	0.227351	0.517753	0.290403	-1.95291	17.586	14.5212	0.000138591	0.0435426	TRUE	hyper
11	79300001	79310000	0.072019	0.251558	0.179539	-2.14364	19.5356	19.0693	1.26054e-05	0.0128706	TRUE	hyper
11	82730001	82740000	0.0652245	0.286083	0.220858	-2.51172	18.8849	19.005	1.30376e-05	0.0129387	TRUE	hyper
11	82740001	82750000	0.0544085	0.190654	0.136246	-2.02021	18.886	14.3821	0.000149216	0.0448948	TRUE	hyper
11	82750001	82760000	0.0552138	0.207269	0.152055	-1.99136	18.8616	14.4382	0.000144836	0.0444435	TRUE	hyper
11	84410001	84420000	0.0786488	0.233424	0.154775	-1.85828	19.9528	17.3625	3.08854e-05	0.0206525	TRUE	hyper
11	87790001	87800000	0.103607	0.320052	0.216445	-2.22102	19.718	18.5059	1.69382e-05	0.0150988	TRUE	hyper
11	89250001	89260000	0.161916	0.425246	0.263329	-2.53658	19.3477	20.7448	5.24749e-06	0.00767444	TRUE	hyper
11	89260001	89270000	0.111054	0.392636	0.281582	-2.40012	19.211	24.8006	6.35767e-07	0.00206113	TRUE	hyper
11	89270001	89280000	0.103944	0.351574	0.24763	-2.43341	19.3596	25.2484	5.04006e-07	0.00182674	TRUE	hyper
11	89280001	89290000	0.184453	0.520902	0.33645	-2.42302	18.4747	25.7416	3.90318e-07	0.00165447	TRUE	hyper
11	89290001	89300000	0.0583957	0.251838	0.193442	-2.35499	19.8419	25.6516	4.08949e-07	0.00170455	TRUE	hyper
11	89310001	89320000	0.029079	0.15435	0.125271	-2.69822	19.1591	21.8666	2.92282e-06	0.00603382	TRUE	hyper
11	89870001	89880000	0.236928	0.566213	0.329286	-2.23842	17.9881	15.3152	9.09805e-05	0.0357252	TRUE	hyper
11	90040001	90050000	0.0791489	0.233224	0.154075	-1.86228	18.5461	15.4304	8.55991e-05	0.0344722	TRUE	hyper
11	90260001	90270000	0.133678	0.311703	0.178025	-1.62514	19.586	14.987	0.000108255	0.0391229	TRUE	hyper
11	99390001	99400000	0.037325	0.156683	0.119358	-2.38098	19.4651	19.6016	9.53871e-06	0.0107941	TRUE	hyper
11	104720001	104730000	0.0969382	0.312187	0.215248	-2.00513	18.4346	14.3531	0.000151528	0.045167	TRUE	hyper
11	113900001	113910000	0.0635223	0.17938	0.115857	-1.65845	19.7112	15.135	0.00010009	0.0378393	TRUE	hyper
11	114880001	114890000	0.0864624	0.263969	0.177507	-2.02514	18.9166	20.3836	6.33715e-06	0.00856669	TRUE	hyper
11	114890001	114900000	0.0598954	0.166036	0.10614	-1.64434	19.1109	14.4918	0.000140774	0.043902	TRUE	hyper
11	119570001	119580000	0.0279665	0.176149	0.148183	-2.77827	19.225	23.5892	1.19258e-06	0.00320804	TRUE	hyper
11	121120001	121130000	0.037	0.194242	0.157242	-2.57344	18.0679	16.8903	3.96029e-05	0.023981	TRUE	hyper
12	3970001	3980000	0.265834	0.480399	0.214565	-1.36981	19.7963	14.1756	0.00016652	0.0468025	TRUE	hyper
12	7580001	7590000	0.196136	0.572167	0.376032	-2.32715	16.8345	16.3746	5.19768e-05	0.028075	TRUE	hyper
12	17030001	17040000	0.14445	0.388264	0.243813	-1.99335	19.7432	16.9121	3.91511e-05	0.023881	TRUE	hyper
12	17560001	17570000	0.135281	0.363609	0.228328	-1.90399	19.1072	20.6952	5.38513e-06	0.00773995	TRUE	hyper
12	21260001	21270000	0.296348	0.518105	0.221757	-1.36956	19.7963	16.1697	5.79141e-05	0.029319	TRUE	hyper
12	25070001	25080000	0.0838671	0.19065	0.106783	-1.36364	19.8683	16.1915	5.72514e-05	0.0291013	TRUE	hyper
12	36330001	36340000	0.245021	0.0696194	-0.175401	2.12685	18.0503	19.525	9.92895e-06	0.0109976	TRUE	hypo
12	37070001	37080000	0.162864	0.460761	0.297897	-2.10682	17.1194	14.3313	0.000153295	0.0453692	TRUE	hyper
12	52480001	52490000	0.0715493	0.283974	0.212425	-2.54999	18.9496	17.4255	2.98787e-05	0.02025	TRUE	hyper
12	52690001	52700000	0.115402	0.393594	0.278192	-2.78381	18.6906	15.6216	7.73661e-05	0.0327105	TRUE	hyper
12	53650001	53660000	0.235437	0.535161	0.299724	-1.94483	18.2207	15.9189	6.61148e-05	0.0308732	TRUE	hyper
12	53670001	53680000	0.169556	0.462506	0.29295	-2.30938	18.4451	16.8583	4.02768e-05	0.0241552	TRUE	hyper
12	53690001	53700000	0.251637	0.568662	0.317025	-2.06017	18.3397	15.8789	6.75272e-05	0.0308732	TRUE	hyper
12	53710001	53720000	0.175694	0.490677	0.314982	-2.52458	17.9549	15.8968	6.68916e-05	0.0308732	TRUE	hyper
12	53750001	53760000	0.124485	0.415919	0.291434	-2.69888	18.959	19.67	9.20358e-06	0.0106069	TRUE	hyper
12	53790001	53800000	0.14021	0.515918	0.375708	-2.77691	19.0115	38.7777	4.74919e-10	9.89759e-06	TRUE	hyper
12	53820001	53830000	0.182208	0.484511	0.302303	-2.22272	18.3887	15.4824	8.32789e-05	0.0339755	TRUE	hyper
12	53940001	53950000	0.132603	0.522493	0.38989	-2.97244	18.4481	31.133	2.40945e-08	0.000223175	TRUE	hyper
12	55580001	55590000	0.0817076	0.256815	0.175108	-2.01835	18.5137	15.7756	7.13172e-05	0.0317923	TRUE	hyper
12	56090001	56100000	0.193445	0.50945	0.316005	-2.24188	17.9881	18.707	1.52425e-05	0.0140978	TRUE	hyper
12	57370001	57380000	0.0590913	0.21086	0.151769	-1.97384	18.2839	15.4036	8.68231e-05	0.0347087	TRUE	hyper
12	57780001	57790000	0.0888446	0.277989	0.189145	-2.07163	18.7607	17.9463	2.27227e-05	0.0175466	TRUE	hyper
12	67410001	67420000	0.203573	0.597151	0.393578	-2.5367	16.9653	19.0522	1.27189e-05	0.0128706	TRUE	hyper
12	70740001	70750000	0.0565683	0.264019	0.207451	-2.4557	18.0948	17.7037	2.58127e-05	0.0186573	TRUE	hyper
12	80290001	80300000	0.0456357	0.170781	0.125145	-1.92494	19.4133	18.15	2.04165e-05	0.0169069	TRUE	hyper
12	87600001	87610000	0.0530727	0.245318	0.192245	-2.53801	17.3604	15.2143	9.59731e-05	0.0368123	TRUE	hyper
12	99160001	99170000	0.0707787	0.198301	0.127522	-1.62449	19.1763	15.8244	6.95022e-05	0.0313396	TRUE	hyper
12	99590001	99600000	0.116634	0.318551	0.201918	-1.83849	18.6804	17.8836	2.34831e-05	0.0175833	TRUE	hyper
12	103130001	103140000	0.122828	0.350658	0.227829	-2.06457	19.179	16.713	4.34826e-05	0.0251132	TRUE	hyper
12	107090001	107100000	0.24791	0.552565	0.304655	-1.89089	18.6994	15.6137	7.76899e-05	0.0327643	TRUE	hyper
12	113650001	113660000	0.117136	0.597555	0.480419	-3.64253	16.4907	24.0031	9.61791e-07	0.00273331	TRUE	hyper
12	113680001	113690000	0.0729573	0.35621	0.283253	-2.68571	16.9819	14.529	0.000138018	0.0435265	TRUE	hyper
12	113690001	113700000	0.135778	0.530463	0.394685	-2.89193	16.923	21.9121	2.85424e-06	0.00600417	TRUE	hyper
12	114590001	114600000	0.148247	0.370588	0.222341	-1.69905	18.8103	17.1253	3.49929e-05	0.0224373	TRUE	hyper
12	115610001	115620000	0.227454	0.0527597	-0.174695	2.69527	16.7834	14.1936	0.000164931	0.0468025	TRUE	hypo
12	116110001	116120000	0.08392	0.265102	0.181183	-1.96975	18.2432	15.0526	0.000104555	0.0384526	TRUE	hyper
12	116120001	116130000	0.164741	0.419225	0.254484	-2.09217	17.9187	18.6536	1.56748e-05	0.0143186	TRUE	hyper
12	116130001	116140000	0.104766	0.427398	0.322632	-2.6694	19.2189	34.2099	4.94767e-09	6.18674e-05	TRUE	hyper
13	3800001	3810000	0.246877	0.510183	0.263306	-1.72459	19.1754	19.7196	8.96764e-06	0.0104311	TRUE	hyper
13	13890001	13900000	0.187169	0.424059	0.23689	-1.87526	18.9528	14.7074	0.000125555	0.0418231	TRUE	hyper
13	15520001	15530000	0.132068	0.488461	0.356393	-2.75222	17.8481	17.6644	2.63512e-05	0.0188288	TRUE	hyper
13	15710001	15720000	0.160029	0.497856	0.337827	-2.44837	17.9942	14.5041	0.000139854	0.0438291	TRUE	hyper
13	20490001	20500000	0.20253	0.484387	0.281857	-1.87425	17.8481	15.8972	6.68772e-05	0.0308732	TRUE	hyper
13	21630001	21640000	0.303946	0.616257	0.312311	-1.92986	18.2031	17.7634	2.50151e-05	0.0182363	TRUE	hyper
13	24400001	24410000	0.109955	0.290379	0.180424	-1.86076	18.3636	14.7227	0.000124535	0.0416005	TRUE	hyper
13	29540001	29550000	0.363435	0.619402	0.255967	-1.53078	18.1343	14.8584	0.000115893	0.0408216	TRUE	hyper
13	30240001	30250000	0.0374711	0.170372	0.132901	-2.30894	19.1278	15.7522	7.22052e-05	0.0319737	TRUE	hyper
13	32840001	32850000	0.0586416	0.263451	0.20481	-2.26219	17.723	14.0483	0.000178175	0.0474539	TRUE	hyper
13	39000001	39010000	0.0137228	0.132362	0.11864	-3.12713	18.2956	21.7606	3.08886e-06	0.00613082	TRUE	hyper
13	40780001	40790000	0.260004	0.516129	0.256125	-1.596	18.5968	16.7737	4.2114e-05	0.0247816	TRUE	hyper
13	41960001	41970000	0.160295	0.0428038	-0.117491	2.21823	18.7069	16.1508	5.84943e-05	0.0294635	TRUE	hypo
13	42290001	42300000	0.211068	0.482426	0.271358	-1.93627	19.0003	19.5232	9.93841e-06	0.0109976	TRUE	hyper
13	44400001	44410000	0.13507	0.353391	0.218321	-2.00716	19.6008	14.5298	0.000137962	0.0435265	TRUE	hyper
13	54190001	54200000	0.0651529	0.22198	0.156827	-1.89871	19.9829	14.7068	0.000125593	0.0418231	TRUE	hyper
13	58690001	58700000	0.0194356	0.133237	0.113802	-2.75553	19.066	15.09	0.000102503	0.0382038	TRUE	hyper
13	59560001	59570000	0.0590718	0.219783	0.160711	-2.11361	19.3421	17.5089	2.85963e-05	0.0196524	TRUE	hyper
13	66370001	66380000	0.180609	0.413959	0.23335	-1.69562	18.7056	15.9613	6.46499e-05	0.0305723	TRUE	hyper
13	67680001	67690000	0.0431412	0.192433	0.149292	-2.22165	18.938	14.1353	0.000170122	0.0469606	TRUE	hyper
13	74620001	74630000	0.0268659	0.141689	0.114823	-2.43293	18.3038	15.7643	7.17435e-05	0.0319255	TRUE	hyper
13	97380001	97390000	0.0374269	0.181157	0.14373	-2.36842	19.2679	17.5596	2.78448e-05	0.0193973	TRUE	hyper
13	97950001	97960000	0.0937167	0.329079	0.235362	-3.69685	19.4747	23.206	1.45546e-06	0.00375249	TRUE	hyper
13	104870001	104880000	0.0223361	0.152902	0.130566	-2.60531	18.1709	14.6535	0.000129198	0.0423206	TRUE	hyper
13	105100001	105110000	0.244322	0.543208	0.298887	-1.82793	18.1582	18.0579	2.14289e-05	0.017267	TRUE	hyper
13	106460001	106470000	0.291801	0.602731	0.31093	-1.95436	17.4525	14.3326	0.00015319	0.0453692	TRUE	hyper
13	106470001	106480000	0.316602	0.63158	0.314978	-1.99672	17.4732	13.9473	0.000188008	0.0487236	TRUE	hyper
13	107940001	107950000	0.107435	0.26418	0.156745	-1.62921	19.4849	14.4303	0.000145443	0.044483	TRUE	hyper
13	111930001	111940000	0.0702454	0.234174	0.163929	-2.05616	19.1799	21.8009	3.02457e-06	0.00605125	TRUE	hyper
13	119390001	119400000	0.0529156	0.173468	0.120553	-1.8585	18.9653	14.3061	0.000155358	0.0457281	TRUE	hyper
14	6220001	6230000	0.132135	0.461129	0.328994	-2.35861	17.6753	14.3451	0.000152174	0.0452516	TRUE	hyper
14	10800001	10810000	0.18128	0.446364	0.265083	-1.89363	17.781	15.5625	7.98214e-05	0.0331126	TRUE	hyper
14	10830001	10840000	0.386884	0.674917	0.288033	-1.68801	17.7353	14.1183	0.000171661	0.0470816	TRUE	hyper
14	12700001	12710000	0.0877951	0.36175	0.273955	-2.56218	17.8594	22.7144	1.8795e-06	0.00441977	TRUE	hyper
14	20430001	20440000	0.0507412	0.214888	0.164146	-2.27779	18.7511	19.6319	9.38895e-06	0.0107709	TRUE	hyper
14	24910001	24920000	0.158975	0.371213	0.212238	-1.7487	19.0225	15.9107	6.64016e-05	0.0308732	TRUE	hyper
14	27600001	27610000	0.0585043	0.182049	0.123544	-1.84511	18.8661	14.585	0.000133979	0.0430052	TRUE	hyper
14	29850001	29860000	0.291711	0.585123	0.293412	-1.83459	18.6248	16.8754	3.99161e-05	0.0241123	TRUE	hyper
14	29870001	29880000	0.120946	0.315156	0.19421	-1.94965	19.2688	14.6769	0.000127602	0.0420963	TRUE	hyper
14	32310001	32320000	0.0802042	0.263855	0.183651	-2.11666	18.8827	16.68	4.42456e-05	0.0252632	TRUE	hyper
14	43120001	43130000	0.160643	0.311199	0.150556	-1.21153	20.7813	14.7747	0.000121148	0.0410897	TRUE	hyper
14	45790001	45800000	0.0815853	0.268652	0.187066	-2.25831	18.8904	21.2085	4.11943e-06	0.00698947	TRUE	hyper
14	45800001	45810000	0.0939244	0.33579	0.241865	-2.5132	19.1325	26.5558	2.56034e-07	0.0012555	TRUE	hyper
14	45820001	45830000	0.0805376	0.346889	0.266351	-2.61427	18.3137	15.5516	8.02821e-05	0.033186	TRUE	hyper
14	45940001	45950000	0.0710268	0.268839	0.197812	-2.1582	18.3995	17.6766	2.61825e-05	0.0188166	TRUE	hyper
14	46170001	46180000	0.0636664	0.218934	0.155268	-1.98922	18.7474	15.9608	6.46685e-05	0.0305723	TRUE	hyper
14	47870001	47880000	0.0440999	0.199884	0.155784	-2.34226	18.5051	15.2718	9.30955e-05	0.0361521	TRUE	hyper
14	48060001	48070000	0.15614	0.40582	0.24968	-1.96188	18.9496	15.4427	8.50434e-05	0.0344565	TRUE	hyper
14	48080001	48090000	0.173084	0.399131	0.226047	-1.68176	18.9983	18.3807	1.80882e-05	0.0156133	TRUE	hyper
14	48200001	48210000	0.0862851	0.33994	0.253655	-3.3701	19.9834	24.9887	5.76687e-07	0.00197942	TRUE	hyper
14	48240001	48250000	0.176344	0.43219	0.255846	-2.02933	19.6861	17.3062	3.18153e-05	0.021117	TRUE	hyper
14	48250001	48260000	0.140492	0.394351	0.253859	-2.53093	20.2658	20.9642	4.67949e-06	0.00714157	TRUE	hyper
14	66130001	66140000	0.0356002	0.137107	0.101507	-2.07884	19.4026	15.4353	8.5377e-05	0.0344565	TRUE	hyper
14	68660001	68670000	0.0799727	0.284581	0.204608	-2.21807	17.9736	14.159	0.000167995	0.0468025	TRUE	hyper
14	69010001	69020000	0.111717	0.40343	0.291713	-2.48917	17.7499	26.403	2.77111e-07	0.00133273	TRUE	hyper
14	76880001	76890000	0.254662	0.51625	0.261588	-1.66497	18.5941	15.7452	7.24734e-05	0.0319737	TRUE	hyper
14	79440001	79450000	0.0240687	0.149898	0.125829	-2.60727	19.0095	17.3829	3.05563e-05	0.0205976	TRUE	hyper
14	87910001	87920000	0.626502	0.250958	-0.375543	2.40167	18.7118	18.8998	1.37768e-05	0.0132515	TRUE	hypo
14	99170001	99180000	0.212441	0.465271	0.25283	-1.69997	18.8161	18.5557	1.65008e-05	0.0148976	TRUE	hyper
14	116260001	116270000	0.538335	0.178655	-0.35968	2.49333	17.3856	20.1634	7.11016e-06	0.00916576	TRUE	hypo
14	116880001	116890000	0.413252	0.17926	-0.233992	1.93294	17.7401	14.7871	0.000120357	0.0410897	TRUE	hypo
14	124700001	124710000	0.459085	0.182911	-0.276174	1.97992	17.9549	18.2797	1.90729e-05	0.0161691	TRUE	hypo
15	25370001	25380000	0.0329877	0.157854	0.124866	-2.33842	18.8436	14.3746	0.000149808	0.0448948	TRUE	hyper
15	25400001	25410000	0.0317879	0.239393	0.207605	-2.98504	19.0405	21.7137	3.16518e-06	0.00621305	TRUE	hyper
15	25820001	25830000	0.239743	0.0719095	-0.167834	2.16776	18.7951	16.822	4.10553e-05	0.0243186	TRUE	hypo
15	30880001	30890000	0.208681	0.468405	0.259724	-1.79285	19.2285	13.8842	0.000194427	0.049973	TRUE	hyper
15	31440001	31450000	0.051646	0.252108	0.200462	-2.53106	19.6804	14.4273	0.000145676	0.044483	TRUE	hyper
15	32780001	32790000	0.199894	0.543123	0.343228	-2.33076	18.4164	23.5424	1.22194e-06	0.00325096	TRUE	hyper
15	36750001	36760000	0.0322946	0.148049	0.115754	-2.20362	19.2922	17.9113	2.31448e-05	0.0175466	TRUE	hyper
15	53350001	53360000	0.0410584	0.196374	0.155316	-2.34884	17.7786	14.4629	0.000142946	0.044247	TRUE	hyper
15	61670001	61680000	0.374958	0.68065	0.305693	-1.84269	17.2137	14.1543	0.000168415	0.0468025	TRUE	hyper
15	75530001	75540000	0.0950282	0.259661	0.164633	-1.74975	18.5208	16.9536	3.83045e-05	0.0237115	TRUE	hyper
15	75560001	75570000	0.185273	0.0614262	-0.123847	1.79667	20.6849	19.0511	1.27267e-05	0.0128706	TRUE	hypo
15	82150001	82160000	0.038888	0.216735	0.177847	-2.73286	19.7762	29.3042	6.18624e-08	0.000455029	TRUE	hyper
15	82250001	82260000	0.0402389	0.230203	0.189964	-2.82611	20.0562	41.4353	1.21836e-10	3.8087e-06	TRUE	hyper
15	82880001	82890000	0.149769	0.45314	0.303371	-2.2252	17.9528	22.5591	2.03774e-06	0.00467533	TRUE	hyper
15	86540001	86550000	0.100468	0.290808	0.19034	-1.75388	18.8739	14.0908	0.000174193	0.0472674	TRUE	hyper
15	86880001	86890000	0.148501	0.479247	0.330746	-2.39801	19.0034	25.4548	4.52868e-07	0.00174942	TRUE	hyper
15	87860001	87870000	0.0964093	0.291921	0.195511	-1.87583	19.0215	17.1206	3.50797e-05	0.0224373	TRUE	hyper
15	89500001	89510000	0.0568277	0.160922	0.104095	-1.65707	20.8984	14.0278	0.000180126	0.04777	TRUE	hyper
15	89770001	89780000	0.152897	0.426817	0.273921	-2.1105	18.1005	20.06	7.5052e-06	0.00952768	TRUE	hyper
15	91200001	91210000	0.150774	0.500539	0.349765	-2.59445	17.7547	22.083	2.61112e-06	0.00567779	TRUE	hyper
15	91220001	91230000	0.213679	0.519824	0.306145	-1.92501	17.7857	14.2262	0.000162102	0.0465838	TRUE	hyper
15	91250001	91260000	0.176672	0.473634	0.296962	-2.13287	19.1509	20.9993	4.59453e-06	0.00713967	TRUE	hyper
15	93190001	93200000	0.103653	0.349284	0.245631	-2.2033	19.3356	16.0706	6.10233e-05	0.0299484	TRUE	hyper
15	93200001	93210000	0.0482252	0.263108	0.214883	-2.69763	19.2216	16.0074	6.3095e-05	0.0303447	TRUE	hyper
15	94080001	94090000	0.0329635	0.249916	0.216952	-2.77116	17.9358	15.7296	7.30735e-05	0.0319737	TRUE	hyper
15	95300001	95310000	0.0599613	0.224128	0.164167	-2.12216	18.6366	15.6902	7.46115e-05	0.0322666	TRUE	hyper
16	6150001	6160000	0.216442	0.499581	0.283139	-1.91572	18.8492	15.6442	7.64465e-05	0.0325771	TRUE	hyper
16	8840001	8850000	0.292684	0.566558	0.273874	-1.67245	17.8904	14.5832	0.000134106	0.0430052	TRUE	hyper
16	15840001	15850000	0.270411	0.519357	0.248946	-1.53466	19.3227	16.3048	5.39275e-05	0.0283928	TRUE	hyper
16	23140001	23150000	0.0778336	0.202085	0.124251	-1.57034	19.2914	14.0697	0.000176162	0.0472702	TRUE	hyper
16	23390001	23400000	0.0332723	0.160422	0.12715	-2.39859	18.0986	15.0319	0.000105709	0.0386516	TRUE	hyper
16	28910001	28920000	0.0434766	0.156364	0.112888	-1.9652	19.4936	17.0951	3.55547e-05	0.0224469	TRUE	hyper
16	37600001	37610000	0.0311455	0.135074	0.103929	-2.43283	18.0444	14.3995	0.00014784	0.0447609	TRUE	hyper
16	39250001	39260000	0.182182	0.452791	0.270609	-1.84312	18.0795	16.2022	5.69277e-05	0.0289957	TRUE	hyper
16	46240001	46250000	0.0599717	0.256691	0.196719	-2.41825	17.7715	16.9146	3.91e-05	0.023881	TRUE	hyper
16	46640001	46650000	0.338889	0.100329	-0.23856	3.09567	16.66	14.1511	0.000168697	0.0468025	TRUE	hypo
16	50900001	50910000	0.134746	0.402762	0.268016	-2.16778	17.6931	15.0224	0.000106242	0.0387315	TRUE	hyper
16	52150001	52160000	0.112983	0.323269	0.210287	-1.92484	18.2013	14.6644	0.000128453	0.0422134	TRUE	hyper
16	56680001	56690000	0.392733	0.619704	0.226971	-1.34294	18.451	14.2181	0.0001628	0.0465838	TRUE	hyper
16	57900001	57910000	0.160568	0.462968	0.3024	-2.18163	17.3887	13.9813	0.00018464	0.0483607	TRUE	hyper
16	73070001	73080000	0.0341543	0.216874	0.18272	-2.85023	18.5022	19.671	9.19847e-06	0.0106069	TRUE	hyper
16	92130001	92140000	0.308358	0.568439	0.260081	-1.60058	19.4812	16.2701	5.49232e-05	0.0286755	TRUE	hyper
17	4250001	4260000	0.227253	0.611021	0.383768	-2.2831	17.5995	24.2794	8.33245e-07	0.00245157	TRUE	hyper
17	7440001	7450000	0.198523	0.415957	0.217434	-1.54718	18.801	14.7842	0.000120544	0.0410897	TRUE	hyper
17	9170001	9180000	0.196238	0.446946	0.250708	-1.7248	18.4673	15.2368	9.48369e-05	0.036601	TRUE	hyper
17	14470001	14480000	0.0451822	0.200072	0.15489	-2.41138	19.1343	24.3678	7.959e-07	0.00239812	TRUE	hyper
17	15170001	15180000	0.0716828	0.274959	0.203276	-2.28196	19.4255	26.2853	2.94515e-07	0.00138971	TRUE	hyper
17	24390001	24400000	0.207097	0.405223	0.198127	-1.36219	19.7816	15.6332	7.68927e-05	0.032593	TRUE	hyper
17	26640001	26650000	0.0464948	0.155604	0.109109	-2.15352	20.1189	14.6565	0.000128992	0.0423206	TRUE	hyper
17	29630001	29640000	0.220891	0.418694	0.197803	-1.34104	20.2518	13.9947	0.000183327	0.0483193	TRUE	hyper
17	36900001	36910000	0.16337	0.399487	0.236117	-1.81875	18.987	13.9863	0.000184143	0.048323	TRUE	hyper
17	53630001	53640000	0.181008	0.432001	0.250993	-1.81279	18.4659	18.8216	1.43531e-05	0.0135565	TRUE	hyper
17	53650001	53660000	0.166233	0.384392	0.218159	-1.61607	19.1736	15.7258	7.32179e-05	0.0319737	TRUE	hyper
17	56290001	56300000	0.0837961	0.22062	0.136824	-1.57673	19.7945	14.6745	0.00012776	0.0420963	TRUE	hyper
17	61370001	61380000	0.498382	0.15333	-0.345052	2.45782	17.2654	18.9431	1.34677e-05	0.0130043	TRUE	hypo
17	63050001	63060000	0.150739	0.360633	0.209894	-1.69953	18.5614	14.0502	0.000177999	0.0474539	TRUE	hyper
17	64940001	64950000	0.259988	0.532975	0.272987	-1.70747	17.9528	14.9007	0.000113323	0.0401722	TRUE	hyper
17	69260001	69270000	0.151908	0.443231	0.291322	-2.38596	19.6709	21.1738	4.19467e-06	0.00698947	TRUE	hyper
17	70100001	70110000	0.124198	0.392462	0.268264	-2.15325	17.8504	14.5534	0.00013624	0.0434035	TRUE	hyper
17	70940001	70950000	0.403421	0.696905	0.293484	-1.72299	18.586	15.1486	9.93745e-05	0.0377121	TRUE	hyper
17	77080001	77090000	0.065	0.393522	0.328522	-3.40936	16.0543	17.4631	2.92942e-05	0.0199621	TRUE	hyper
17	80810001	80820000	0.0838425	0.241741	0.157899	-1.78716	19.0424	17.9177	2.30668e-05	0.0175466	TRUE	hyper
17	83650001	83660000	0.056378	0.217536	0.161158	-2.11564	19.0424	14.899	0.000113422	0.0401722	TRUE	hyper
17	84770001	84780000	0.436471	0.682091	0.24562	-1.45643	19.2561	16.4743	4.93146e-05	0.0272251	TRUE	hyper
17	88910001	88920000	0.0932262	0.385611	0.292385	-2.69406	18.2066	20.9985	4.59635e-06	0.00713967	TRUE	hyper
18	12560001	12570000	0.0966978	0.28811	0.191412	-2.11485	18.7168	14.8311	0.000117579	0.0408782	TRUE	hyper
18	23570001	23580000	0.220265	0.522193	0.301928	-1.8774	17.6392	14.1676	0.000167226	0.0468025	TRUE	hyper
18	23580001	23590000	0.25957	0.522825	0.263255	-1.66282	18.0795	16.9136	3.91211e-05	0.023881	TRUE	hyper
18	23620001	23630000	0.287425	0.560449	0.273023	-1.6442	18.4285	18.8549	1.41047e-05	0.0134633	TRUE	hyper
18	35510001	35520000	0.0320581	0.220094	0.188036	-2.97687	18.9747	20.1969	6.98669e-06	0.00910042	TRUE	hyper
18	41930001	41940000	0.29233	0.609005	0.316675	-2.0028	18.454	17.2236	3.32289e-05	0.021641	TRUE	hyper
18	41940001	41950000	0.054359	0.295701	0.241342	-3.05324	19.091	22.109	2.57601e-06	0.00565112	TRUE	hyper
18	41950001	41960000	0.0810298	0.335772	0.254742	-2.57127	19.3194	26.7515	2.31369e-07	0.00115725	TRUE	hyper
18	42020001	42030000	0.145238	0.371102	0.225864	-2.02248	18.8739	15.4018	8.69033e-05	0.0347087	TRUE	hyper
18	52070001	52080000	0.186394	0.566539	0.380145	-2.50902	16.8661	16.7304	4.30844e-05	0.0249997	TRUE	hyper
18	60280001	60290000	0.141534	0.0185528	-0.122981	2.63593	17.6931	15.1266	0.000100539	0.0378393	TRUE	hypo
18	62790001	62800000	0.0594877	0.272919	0.213431	-2.45091	18.2922	17.5659	2.77527e-05	0.0193871	TRUE	hyper
18	69410001	69420000	0.169253	0.427717	0.258464	-1.86521	19.11	18.1019	2.09394e-05	0.0170405	TRUE	hyper
18	69420001	69430000	0.113824	0.377765	0.263941	-2.38956	19.1691	18.0076	2.20029e-05	0.0173888	TRUE	hyper
18	69430001	69440000	0.110568	0.344172	0.233604	-2.15493	19.2058	14.3031	0.000155604	0.0457281	TRUE	hyper
18	69440001	69450000	0.0857029	0.37611	0.290407	-2.64007	19.5921	34.5095	4.24168e-09	5.5831e-05	TRUE	hyper
18	69450001	69460000	0.0913445	0.3134	0.222056	-2.092	19.3005	21.9032	2.86762e-06	0.00600417	TRUE	hyper
18	69460001	69470000	0.144758	0.359123	0.214365	-1.75151	18.9819	14.5804	0.000134301	0.0430052	TRUE	hyper
18	69530001	69540000	0.238311	0.548275	0.309965	-2.01748	18.6943	19.9331	8.01993e-06	0.00987221	TRUE	hyper
18	69540001	69550000	0.288032	0.566948	0.278916	-1.75189	18.5995	14.2291	0.000161849	0.0465838	TRUE	hyper
18	69670001	69680000	0.0944349	0.370723	0.276288	-2.58968	19.4607	28.9683	7.35736e-08	0.000525709	TRUE	hyper
19	3590001	3600000	0.190765	0.388077	0.197312	-1.53007	19.7224	14.6131	0.000131992	0.0427859	TRUE	hyper
19	3640001	3650000	0.246551	0.520524	0.273973	-1.74406	19.7839	15.1594	9.88063e-05	0.0376106	TRUE	hyper
19	6580001	6590000	0.0828277	0.249595	0.166767	-1.80784	19.1005	16.2969	5.41517e-05	0.0284079	TRUE	hyper
19	9020001	9030000	0.0361259	0.139942	0.103816	-2.38339	18.7643	14.499	0.000140236	0.0438938	TRUE	hyper
19	9050001	9060000	0.031111	0.173784	0.142673	-2.78821	18.6931	24.8553	6.17986e-07	0.00203356	TRUE	hyper
19	9060001	9070000	0.0128123	0.113474	0.100662	-2.7395	18.723	14.0371	0.000179241	0.0475858	TRUE	hyper
19	9920001	9930000	0.065136	0.191198	0.126062	-1.82226	19.2233	18.0976	2.09866e-05	0.0170405	TRUE	hyper
19	16570001	16580000	0.372463	0.669108	0.296645	-1.79107	18.6208	19.6026	9.53413e-06	0.0107941	TRUE	hyper
19	22790001	22800000	0.286892	0.552366	0.265474	-1.64563	18.0205	14.596	0.000133196	0.042926	TRUE	hyper
19	22950001	22960000	0.117799	0.31548	0.197681	-1.76547	18.7857	14.5335	0.000137687	0.0435265	TRUE	hyper
19	24590001	24600000	0.224062	0.549865	0.325802	-2.06303	17.6022	19.9716	7.86015e-06	0.0097797	TRUE	hyper
19	28850001	28860000	0.128518	0.370441	0.241923	-1.94152	18.6035	14.6238	0.000131247	0.042683	TRUE	hyper
19	28860001	28870000	0.0698332	0.280793	0.21096	-2.45525	19.457	24.5126	7.3827e-07	0.00233711	TRUE	hyper
19	28870001	28880000	0.135695	0.441049	0.305354	-3.14179	19.0054	24.0647	9.31506e-07	0.00267767	TRUE	hyper
19	32470001	32480000	0.0234212	0.129492	0.106071	-2.40751	19.2501	16.1418	5.87732e-05	0.0294635	TRUE	hyper
19	34690001	34700000	0.182674	0.497643	0.31497	-2.14341	17.7619	22.6848	1.90868e-06	0.00441977	TRUE	hyper
19	36610001	36620000	0.331977	0.629827	0.297849	-1.77273	18.2066	16.3415	5.28929e-05	0.0282043	TRUE	hyper
19	37830001	37840000	0.0405709	0.158618	0.118047	-2.71676	18.9664	17.9599	2.25605e-05	0.017522	TRUE	hyper
19	38190001	38200000	0.172736	0.404569	0.231833	-1.69328	18.6195	15.0721	0.000103484	0.0382839	TRUE	hyper
19	41990001	42000000	0.173548	0.37512	0.201573	-1.60838	19.6798	17.7452	2.52556e-05	0.0183076	TRUE	hyper
19	47030001	47040000	0.0482606	0.227035	0.178775	-2.39431	18.7869	19.0242	1.2907e-05	0.0128706	TRUE	hyper
19	47560001	47570000	0.113034	0.260834	0.147801	-1.47238	19.4849	16.6723	4.44251e-05	0.0253079	TRUE	hyper
19	47800001	47810000	0.0297744	0.160889	0.131115	-2.6873	18.8149	17.6396	2.66965e-05	0.0189672	TRUE	hyper
19	59890001	59900000	0.186305	0.472642	0.286337	-2.05784	17.4011	14.8239	0.000118033	0.0408782	TRUE	hyper
19	59900001	59910000	0.279952	0.635704	0.355751	-2.15977	17.8705	17.7825	2.47655e-05	0.0181752	TRUE	hyper
X	7090001	7100000	0.117836	0.00691451	-0.110921	3.42599	17.3251	15.3041	9.15156e-05	0.0358167	TRUE	hypo
X	8940001	8950000	0.126167	0.00735871	-0.118808	3.46398	17.6625	18.1277	2.0657e-05	0.017014	TRUE	hypo
X	10710001	10720000	0.211224	0.621771	0.410547	-3.12442	19.4338	16.926	3.88659e-05	0.023881	TRUE	hyper
X	10860001	10870000	0.0299465	0.292545	0.262599	-3.31406	16.6128	15.3149	9.09961e-05	0.0357252	TRUE	hyper
X	12830001	12840000	0.0538291	0.284743	0.230914	-2.75754	17.7279	20.8912	4.86134e-06	0.00727999	TRUE	hyper
X	13300001	13310000	0.161159	0.537048	0.375888	-2.91617	17.957	25.1505	5.30258e-07	0.00186775	TRUE	hyper
X	14480001	14490000	0.345909	0.708071	0.362162	-2.16489	17.1306	14.8279	0.000117778	0.0408782	TRUE	hyper
X	25500001	25510000	0.173968	0.526544	0.352576	-2.37524	17.3604	16.6233	4.55887e-05	0.0257944	TRUE	hyper
X	35990001	36000000	0.110911	0.351057	0.240145	-2.10302	17.9057	14.0513	0.000177889	0.0474539	TRUE	hyper
X	36490001	36500000	0.102991	0.357026	0.254036	-1.96533	17.8571	14.7731	0.000121255	0.0410897	TRUE	hyper
X	36800001	36810000	0.0465158	0.27047	0.223954	-2.9804	19.0747	21.0767	4.4127e-06	0.00707409	TRUE	hyper
X	37930001	37940000	0.123504	0.01	-0.113504	3.46118	17.0424	15.8063	7.01696e-05	0.0314808	TRUE	hypo
X	38110001	38120000	0.305241	0.63279	0.327549	-2.14723	17.7426	13.8738	0.000195508	0.049994	TRUE	hyper
X	39100001	39110000	0.00645161	0.385097	0.378646	-5.40745	16.839	31.7746	1.73138e-08	0.000168162	TRUE	hyper
X	39170001	39180000	0.297553	0.576387	0.278833	-1.73007	18.7547	17.8319	2.41303e-05	0.0179071	TRUE	hyper
X	43050001	43060000	0.02	0.473601	0.453601	-4.68171	16.0621	25.5228	4.37187e-07	0.00173547	TRUE	hyper
X	44240001	44250000	0.0740658	0.321631	0.247565	-2.73628	17.9252	15.7549	7.21013e-05	0.0319737	TRUE	hyper
X	49510001	49520000	0.4981	0.164175	-0.333924	2.40623	16.5307	15.7036	7.40849e-05	0.032222	TRUE	hypo
X	51410001	51420000	0.272949	0.0664164	-0.206532	2.70404	16.8207	15.7292	7.30884e-05	0.0319737	TRUE	hypo
X	51890001	51900000	0.134257	0.0321918	-0.102065	2.59573	18.1231	15.0616	0.000104058	0.0383827	TRUE	hypo
X	57780001	57790000	0.239367	0.0206148	-0.218752	3.15816	17.3088	16.2216	5.63476e-05	0.0289957	TRUE	hypo
X	59610001	59620000	0.0587302	0.322396	0.263666	-2.99711	16.3445	14.0753	0.000175639	0.0472674	TRUE	hyper
X	61290001	61300000	0.372688	0.0928598	-0.279829	2.57197	17.3604	22.9553	1.65814e-06	0.00406549	TRUE	hypo
X	62680001	62690000	0.371474	0.120592	-0.250883	2.64594	16.4376	14.7612	0.000122019	0.0412081	TRUE	hypo
X	64330001	64340000	0.609524	0.196635	-0.412889	2.49492	16.2449	14.3237	0.000153911	0.0454978	TRUE	hypo
X	68880001	68890000	0.284896	0.0455853	-0.23931	3.57799	16.5194	19.0531	1.27131e-05	0.0128706	TRUE	hypo
X	69590001	69600000	0	0.182601	0.182601	-4.55668	16.138	15.0291	0.000105869	0.0386516	TRUE	hyper
X	71460001	71470000	0.420601	0.800207	0.379606	-2.45983	17.3604	23.1393	1.50676e-06	0.00384511	TRUE	hyper
X	73680001	73690000	0.41885	0.737368	0.318518	-1.93095	17.6931	14.8939	0.000113728	0.0401722	TRUE	hyper
X	73800001	73810000	0.0706127	0.386845	0.316232	-2.8849	17.3284	21.8531	2.94348e-06	0.00603382	TRUE	hyper
X	81230001	81240000	0.533886	0.185167	-0.34872	2.1997	16.8436	16.4059	5.11269e-05	0.0279475	TRUE	hypo
X	87830001	87840000	0.530014	0.100113	-0.429901	3.68814	17.1889	19.1616	1.20103e-05	0.0124632	TRUE	hypo
X	89810001	89820000	0.0422222	0.390254	0.348032	-3.36812	16.2518	16.3608	5.23564e-05	0.0280811	TRUE	hyper
X	100080001	100090000	0.255433	0.710654	0.45522	-2.77939	16.1527	18.0137	2.19326e-05	0.0173888	TRUE	hyper
X	100990001	101000000	0.275253	0.021875	-0.253378	3.29619	16.1889	14.934	0.000111339	0.0397347	TRUE	hypo
X	102280001	102290000	0.189568	0.528836	0.339268	-2.22146	17.5641	20.619	5.60367e-06	0.00791754	TRUE	hyper
X	102990001	103000000	0.232581	0.0191761	-0.213405	3.47405	16.2242	15.4149	8.63053e-05	0.0347007	TRUE	hypo
X	108820001	108830000	0.062961	0.334653	0.271692	-2.63896	17.1005	14.194	0.000164895	0.0468025	TRUE	hyper
X	113950001	113960000	0.347296	0.60116	0.253863	-1.51301	18.8537	16.2455	5.56425e-05	0.0287806	TRUE	hyper
X	128770001	128780000	0.462149	0.104153	-0.357996	2.67325	16.4555	15.9913	6.36358e-05	0.0304292	TRUE	hypo
X	132500001	132510000	0.373889	0.10496	-0.268929	2.77257	16.5531	14.1844	0.000165737	0.0468025	TRUE	hypo
X	139420001	139430000	0.154762	0.573825	0.419063	-2.87933	16.0929	14.4123	0.000146842	0.0446754	TRUE	hyper
X	143090001	143100000	0.130186	0.00977828	-0.120407	3.45965	18.1062	23.8232	1.05603e-06	0.00293445	TRUE	hypo
X	147460001	147470000	0.124048	0.475449	0.351401	-2.70297	16.4849	14.7591	0.000122156	0.0412081	TRUE	hyper
X	150490001	150500000	0.37784	0.694031	0.31619	-1.82277	17.3186	14.6829	0.000127195	0.0420766	TRUE	hyper
X	151960001	151970000	0.396808	0.70642	0.309613	-2.01414	17.3667	15.6364	7.67611e-05	0.0325924	TRUE	hyper
X	162920001	162930000	0.171307	0.445413	0.274106	-2.1449	17.923	16.3094	5.37966e-05	0.0283928	TRUE	hyper
X	166770001	166780000	0.216268	0.0433949	-0.172873	2.94927	17.0024	17.9694	2.2448e-05	0.017522	TRUE	hypo
X	167010001	167020000	0.15896	0.543894	0.384934	-2.9183	16.8571	20.3352	6.49931e-06	0.00864571	TRUE	hyper
X	167060001	167070000	0.120063	0.364284	0.244221	-1.99835	17.3604	14.5767	0.00013457	0.043036	TRUE	hyper
X	167120001	167130000	0.468321	0.129438	-0.338883	2.40205	16.6906	15.4041	8.67986e-05	0.0347087	TRUE	hypo
Y	40580001	40590000	0.151101	0.487904	0.336803	-2.83041	17.0105	15.9012	6.67352e-05	0.0308732	TRUE	hyper
